# Supplementary material for: A new class of extracellular vesicles, Motile Vesicles (“MoVes”), carry whole genome DNA and are emitted during active cancer cell migration
Source: Research Square preprint supplement (doi:10.21203/rs.3.rs-7054528/v1), 2025-07-21
Supplement: Supplementary file 1 [file 0a1bb1435f6bf33aa3e73f4d.xlsx]

## Sheet: Supplementary table 3
Supplementary Table 3: Volcano plot raw data of Fig. 4b
Protein name	sEVs1	sEVs2	sEVs3	MoVes1	MoVes2	MoVes3	std_all	sEV_mean	MoVes_mean	log2FC	p_value	- LOG10( p_ value)
Fn1	565	591	288	55	62	6	264.237	481.333	41	-3.52157	0.0413837	1.38317
Hspg2	248	260	108	23	27	0	116.705	205.333	16.6667	-3.54588	0.0570078	1.24407
Hspa8	115	140	119	79	72	42	36.3139	124.667	64.3333	-0.943711	0.0154798	1.81024
Actg1	55	69	32	27	32	35	16.561	52	31.3333	-0.71297	0.19102	0.718922
Itgb1	97	104	102	161	200	44	54.6663	101	135	0.415037	0.543712	0.264631
Eno1	39	29	41	6	13	3	16.7143	36.3333	7.33333	-2.1635	0.00425021	2.37159
Msn	55	70	81	8	13	22	31.2074	68.6667	14.3333	-2.1838	0.00729632	2.1369
Eef2	39	43	36	35	45	20	8.89194	39.3333	33.3333	-0.232363	0.499865	0.301147
Hsp90ab1	35	39	34	7	16	4	15.3981	36	9	-1.88753	0.00874535	2.05822
Pdcd6ip	147	177	164	1	1	0	89.2405	162.667	0.666667	-6.61765	0.00282842	2.54846
Flna	16	22	4	92	99	12	42.8038	14	67.6667	2.19465	0.190841	0.719327
Itga3	82	91	90	130	148	44	36.8985	87.6667	107.333	0.289013	0.602842	0.219796
Myh9	28	27	32	13	16	3	11.0529	29	10.6667	-1.36257	0.0301513	1.52069
Myof	35	44	49	88	89	17	29.1044	42.6667	64.6667	0.588629	0.45438	0.342581
Cltc	78	102	41	6	12	0	42.021	73.6667	6	-3.41504	0.0575472	1.23998
Hsp90aa1	27	27	23	5	11	3	11.0091	25.6667	6.33333	-1.8625	0.00516291	2.28711
Pkm	37	39	60	6	17	5	21.7133	45.3333	9.33333	-2.16474	0.0223589	1.65055
Anxa1	40	46	41	4	6	5	20.5589	42.3333	5	-2.85244	0.0011395	2.94328
Dync1h1	23	21	104	0	0	0	40.3369	49.3333	0	-5.65344	0.212922	0.67178
Fasn	29	29	76	5	4	2	28.2801	44.6667	3.66667	-3.29068	0.119784	0.921602
Tuba1b	36	37	38	12	20	2	15.1844	37	11.3333	-1.62344	0.037356	1.42764
Actn1	14	14	3	85	86	18	38.1558	10.3333	63	2.4975	0.140745	0.851567
Tubb5	26	34	34	9	26	0	13.9392	31.3333	11.6667	-1.35199	0.11071	0.955813
Plec	0	2	0	1	1	0	0.816497	0.666667	0.666667	0	1	0
Hspa5	16	15	20	60	65	27	22.6576	17	50.6667	1.52124	0.103532	0.984927
H4c1	109	117	198	12	8	3	79.6109	141.333	7.66667	-4.03765	0.0413614	1.38341
Eef1a1	29	34	25	12	16	5	11.0167	29.3333	11	-1.33787	0.0125398	1.90171
Gapdh	35	35	28	5	7	1	15.8461	32.6667	4.33333	-2.65821	0.000897064	3.04718
Tln1	37	42	31	3	3	2	18.9491	36.6667	2.66667	-3.36075	0.00809246	2.09192
Iqgap1	19	24	10	36	48	4	16.3677	17.6667	29.3333	0.70044	0.472927	0.325206
Ptgfrn	142	154	137	11	9	2	75.3005	144.333	7.33333	-4.12433	0.000134752	3.87046
Rps27a	63	76	83	36	42	10	27.4858	74	29.3333	-1.30599	0.0255576	1.59248
H2bc7	123	127	160	4	3	1	74.5162	136.667	2.66667	-5.23057	0.0073081	2.1362
Itga2	54	61	48	76	78	20	21.3206	54.3333	58	0.0925661	0.866244	0.0623598
Tubb4b	22	28	28	6	18	0	11.6447	26	8	-1.58496	0.0621469	1.20658
Anxa2	31	36	28	6	11	7	13.3179	31.6667	8	-1.85982	0.00198557	2.70212
Actn4	8	9	3	67	77	21	32.5848	6.66667	55	2.86876	0.105546	0.976557
Hspd1	3	1	0	1	9	4	3.28634	1.33333	4.66667	1.28011	0.287804	0.540903
Atp1a1	34	38	54	16	16	10	16.876	42	14	-1.51937	0.0341954	1.46603
Anxa5	24	32	32	26	39	8	10.6286	29.3333	24.3333	-0.259867	0.640018	0.193808
Aldoa	11	11	13	23	33	8	9.58645	11.6667	21.3333	0.818162	0.314423	0.502485
Ctnna1	49	56	54	17	18	5	22.3196	53	13.3333	-1.91359	0.00371026	2.4306
Ehd1	71	83	64	0	0	0	40.2625	72.6667	0	-6.20294	0.00577816	2.23821
Mfge8	75	67	48	24	35	1	27.5802	63.3333	20	-1.61518	0.0299115	1.52416
Plxnb2	34	40	26	82	102	11	35.1478	33.3333	65	0.942856	0.370009	0.431788
Flnb	4	5	0	57	61	4	28.8681	3	40.6667	3.38082	0.175978	0.754542
Ywhaz	29	27	24	12	17	9	8.23812	26.6667	12.6667	-1.01749	0.011142	1.95304
Ezr	23	29	39	7	9	11	12.8167	30.3333	9	-1.6477	0.0380787	1.41932
Rdx	20	25	30	5	0	11	11.7544	25	5.33333	-2.03747	0.0104127	1.98244
KRT1	0	0	0	94	105	0	51.4992	0	66.3333	6.07325	0.184748	0.73342
Itgav	57	53	57	51	65	5	21.6056	55.6667	40.3333	-0.455195	0.4868	0.312649
Pgk1	16	18	19	3	7	5	7.11805	17.6667	5	-1.63743	0.00128298	2.89178
Vcp	17	22	36	0	9	0	13.9571	25	3	-2.70044	0.0410841	1.38633
Anxa6	34	44	37	9	7	5	17.5119	38.3333	7	-2.29768	0.00399894	2.39806
Slc3a2	28	33	33	49	54	25	11.7473	31.3333	42.6667	0.43351	0.332268	0.478512
KRT10	31	44	0	68	83	0	34.3434	25	50.3333	0.981384	0.442528	0.354059
Ywhae	21	22	18	11	15	9	5.2915	20.3333	11.6667	-0.752072	0.0196946	1.70565
Sdcbp	85	100	86	5	13	2	46.272	90.3333	6.66667	-3.57447	0.000304687	3.51615
Myh10	14	14	15	15	15	0	5.98052	14.3333	10	-0.479168	0.477635	0.320904
Mdh2	3	0	5	76	79	36	36.7337	2.66667	63.6667	4.14048	0.0465649	1.33194
H2ac20	42	45	69	7	5	1	27.8023	52	4.33333	-3.31288	0.0265811	1.57543
Anxa3	25	21	27	29	27	13	5.88784	24.3333	23	-0.0780025	0.821793	0.0852375
Vcl	18	23	17	22	27	8	6.5549	19.3333	19	-0.0238467	0.959826	0.0178075
KRT9	20	31	0	61	66	0	28.8352	17	42.3333	1.26748	0.360187	0.443472
Thbs1	107	75	77	6	6	1	46.358	86.3333	4.33333	-4.03342	0.0137778	1.86082
Vars1	10	13	52	0	0	0	20.1767	25	0	-4.70044	0.205849	0.686452
Ppia	23	21	14	10	14	7	6.17792	19.3333	10.3333	-0.843274	0.0620587	1.2072
Lama5	68	69	115	22	31	1	41.1096	84	18	-2.16146	0.0310874	1.50742
Ywhaq	23	22	17	7	10	5	7.74597	20.6667	7.33333	-1.37851	0.00568593	2.2452
Cct2	25	19	31	0	2	1	13.6967	25	1	-3.70044	0.0179878	1.74502
Eno3	9	0	10	0	0	0	4.91596	6.33333	0	-2.87447	0.184632	0.733693
Flnc	0	5	0	39	44	3	20.5467	1.66667	28.6667	3.47573	0.169733	0.770234
Uba1	13	16	25	1	3	1	9.80646	18	1.66667	-2.83289	0.0414656	1.38231
Ldha	19	21	12	2	3	0	9.13783	17.3333	1.66667	-2.78136	0.0207501	1.68298
Itgb4	30	36	24	34	37	5	12.0775	30	25.3333	-0.235378	0.700109	0.154834
Sptan1	0	0	0	29	28	0	14.7207	0	19	4.32193	0.183629	0.736059
Ctnnd1	36	42	39	0	1	0	21.2666	39	0.333333	-4.90689	0.00145132	2.83824
Hspa9	0	0	1	24	23	15	11.5715	0.333333	20.6667	4.02237	0.0179571	1.74576
Gcn1	1	2	2	0	0	0	0.983192	1.66667	0	-1.41504	0.0377496	1.42309
Hsp90b1	11	10	7	0	8	5	3.97073	9.33333	4.33333	-0.954196	0.153139	0.814913
Ctnnb1	28	36	28	1	1	4	16.0083	30.6667	2	-3.39993	0.00403963	2.39366
Myo1c	32	37	21	4	3	0	16.0676	30	2.33333	-3.21723	0.0223924	1.6499
Pabpc1	28	36	19	0	0	0	16.08	27.6667	0	-4.8413	0.0300852	1.52165
Igf2r	6	8	1	79	90	11	40.5598	5	60	3.34577	0.15499	0.809697
Cct4	19	18	26	0	2	0	11.4964	21	0.666667	-3.72247	0.0108608	1.96414
Gnai2	32	39	27	3	6	2	16.388	32.6667	3.66667	-2.85086	0.00826419	2.0828
Atic	14	14	11	3	3	1	5.98888	13	2.33333	-2.07039	0.00163641	2.78611
Ywhag	16	16	12	7	9	9	3.83406	14.6667	8.33333	-0.747234	0.0248543	1.6046
Ywhab	16	15	11	0	0	4	7.28469	14	1.33333	-2.6845	0.00355441	2.44923
Ywhah	16	15	11	0	0	6	7.12741	14	2	-2.32193	0.0104288	1.98176
Krt18	5	3	0	8	9	6	3.3116	2.66667	7.66667	1.24101	0.0537522	1.2696
Lmna	6	7	2	4	13	0	4.54606	5	5.66667	0.152003	0.883586	0.0537512
Got2	0	0	0	49	44	42	24.7528	0	45	5.52356	0.00213307	2.67099
Lgals1	12	10	8	11	12	9	1.63299	10	10.6667	0.0848889	0.671737	0.172801
Cct6a	9	12	19	0	0	0	7.99166	13.3333	0	-3.8413	0.0459952	1.33729
Tkt	5	6	9	4	3	2	2.48328	6.66667	3	-0.938599	0.0741435	1.12993
Tubb6	10	11	13	0	0	0	6.28225	11.3333	0	-3.62449	0.00600091	2.22178
Htra1	60	68	52	1	1	1	32.7093	60	1	-4.93074	0.00607274	2.21662
Ncl	13	13	5	0	3	0	5.98888	10.3333	1	-2.5025	0.0585841	1.23222
Ehd4	43	43	41	0	1	0	23.0188	42.3333	0.333333	-5.02237	1.48001e-05	4.82973
Pdia3	2	3	1	16	20	15	8.40833	2	17	2.58496	0.00501594	2.29965
Cad	15	15	35	0	0	0	13.9344	21.6667	0	-4.5025	0.0830507	1.08066
Cct3	9	11	25	0	2	0	9.62116	15	0.666667	-3.26303	0.101894	0.991851
Gpd2	0	0	0	60	65	25	30.6594	0	50	5.67243	0.0578886	1.23741
Tpi1	7	5	8	7	11	4	2.44949	6.66667	7.33333	0.120294	0.784506	0.105403
Lamb1	38	38	70	18	24	0	23.653	48.6667	14	-1.72732	0.062649	1.20309
Alb	20	17	0	0	0	109	42.4672	12.3333	36.3333	1.48543	0.578559	0.237652
Itga6	29	29	24	16	19	4	9.49561	27.3333	13	-1.01707	0.074966	1.12514
Pls3	5	4	3	28	24	6	11.219	4	19.3333	2.02385	0.150677	0.821952
Hspa1b	23	25	25	6	6	0	11.3739	24.3333	4	-2.34104	0.0053179	2.27426
Cct8	11	11	22	0	0	0	8.98146	14.6667	0	-3.96963	0.057191	1.24267
Pfn1	11	11	8	17	19	3	5.85662	10	13	0.347923	0.614144	0.21173
Eif4a1	11	11	10	2	5	0	4.84768	10.6667	2.33333	-1.80735	0.0243062	1.61428
Cfl1	14	15	11	3	3	0	6.43946	13.3333	2	-2.25634	0.00217687	2.66217
Krt7	3	7	2	9	10	2	3.61939	4	7	0.678072	0.377023	0.423632
Krt8	4	4	6	10	14	3	4.30891	4.66667	9	0.819428	0.308773	0.510361
Cdc42	22	27	27	3	12	5	10.8074	25.3333	6.66667	-1.78022	0.00757385	2.12068
Atp5f1b	1	0	1	1	5	0	1.8619	0.666667	2	0.847997	0.476793	0.32167
Phgdh	12	11	17	1	1	0	7.23878	13.3333	0.666667	-3.10434	0.0182177	1.73951
Kpnb1	5	9	6	1	0	0	3.72827	6.66667	0.333333	-2.52356	0.027086	1.56726
Tcp1	15	14	25	0	0	0	10.583	18	0	-4.24793	0.0360216	1.44344
Ipo5	7	6	2	0	0	0	3.20936	5	0	-2.58496	0.0820149	1.08611
Fv4	24	28	18	20	20	8	6.7429	23.3333	16	-0.517399	0.218722	0.660108
Wdr1	7	11	5	23	26	1	10.1275	7.66667	16.6667	1.02748	0.37197	0.429492
H1-3	21	30	71	5	5	0	26.5631	40.6667	3.33333	-3.26534	0.134467	0.871383
Cct7	10	7	11	0	0	0	5.27889	9.33333	0	-3.36923	0.0161803	1.79101
Hspa4	7	7	11	0	1	0	4.63321	8.33333	0.333333	-2.80735	0.0213939	1.66971
Bsg	13	12	19	39	44	16	13.9917	14.6667	33	1.11784	0.160763	0.793814
Prdx1	8	8	6	12	20	11	4.99667	7.33333	14.3333	0.879706	0.126656	0.897373
Gdi2	8	14	6	1	2	0	5.30723	9.33333	1	-2.36923	0.0668677	1.17478
Cct5	10	9	20	0	0	0	8.09321	13	0	-3.80735	0.0658515	1.18143
Eef1g	6	5	10	5	5	1	2.87518	7	3.66667	-0.777608	0.176822	0.752464
KRT1	0	0	55	0	0	38	24.6069	18.3333	12.6667	-0.500429	0.813284	0.0897579
ALB	0	0	45	0	0	35	20.8966	15	11.6667	-0.337035	0.869767	0.0605969
Krt19	4	3	1	8	8	4	2.80476	2.66667	6.66667	1.06413	0.076178	1.11817
Sfn	11	10	6	0	0	5	4.71876	9	1.66667	-1.90689	0.0319086	1.49609
Lamc1	34	33	65	20	22	0	21.4849	44	14	-1.58496	0.0859424	1.06579
P4hb	2	1	0	12	19	6	7.4744	1	12.3333	2.73697	0.0912585	1.03973
Fbln2	56	56	27	2	5	0	26.3717	46.3333	2.33333	-3.82782	0.0423378	1.37327
H3c2	19	17	31	0	0	0	13.1365	22.3333	0	-4.54432	0.0362455	1.44075
Mybbp1a	4	4	3	0	0	0	2.04124	3.66667	0	-2.22239	0.0081634	2.08813
Pgam1	5	6	4	11	13	6	3.61939	5	10	0.874469	0.129767	0.886837
Tfrc	22	26	17	1	1	5	11.0635	21.6667	2.33333	-2.76553	0.00718648	2.14348
Epha2	36	39	28	7	7	5	15.7692	34.3333	6.33333	-2.26849	0.0110047	1.95842
Mvp	40	43	79	0	0	0	32.6067	54	0	-5.78136	0.0498493	1.30234
Eprs1	3	4	17	0	0	0	6.60303	8	0	-3.16993	0.218038	0.661468
Tinagl1	37	39	22	1	4	0	18.0157	32.6667	1.66667	-3.65821	0.0241149	1.61771
Tmprss11e	25	28	22	29	29	9	7.68548	25	22.3333	-0.156119	0.731994	0.135493
Igsf8	53	63	41	0	0	0	29.4986	52.3333	0	-5.73697	0.0144481	1.84019
Clic1	12	12	6	2	5	1	4.76095	10	2.66667	-1.58496	0.0456862	1.34022
Gnas	25	26	15	6	7	4	9.78604	22	5.66667	-1.7866	0.0365804	1.43675
Gnb2	19	24	16	4	5	7	8.31264	19.6667	5.33333	-1.70627	0.0159369	1.7976
Fscn1	5	7	10	8	5	18	4.87511	7.33333	10.3333	0.443607	0.534201	0.272296
Ppp2r1a	9	12	3	0	0	0	5.25357	8	0	-3.16993	0.0941784	1.02605
Eif3a	5	5	8	0	0	0	3.4641	6	0	-2.80735	0.0266715	1.57395
Atp5f1a	1	1	0	2	4	0	1.50555	0.666667	2	0.847997	0.368501	0.433561
Jup	27	25	17	3	3	0	12.0291	23	2	-3	0.0136088	1.86618
Ptgs2	22	21	16	27	31	9	7.82304	19.6667	22.3333	0.175087	0.736167	0.133024
Rps3	10	8	20	0	3	0	7.65289	12.6667	1	-2.77259	0.0791946	1.1013
Acly	7	6	20	0	0	0	7.79102	11	0	-3.58496	0.134868	0.870092
Smpdl3b	10	17	11	36	45	4	16.2819	12.6667	28.3333	1.10188	0.334376	0.475765
Tagln2	4	6	6	12	15	2	4.96991	5.33333	9.66667	0.752072	0.385246	0.414262
Adam10	48	49	42	6	5	2	23.1661	46.3333	4.33333	-3.14975	0.000371035	3.43059
Cs	1	1	1	30	29	18	14.1516	1	25.6667	3.73697	0.0234373	1.63009
Col18a1	32	32	15	4	5	0	14.3062	26.3333	3	-2.77259	0.0460951	1.33635
Ap2b1	9	13	5	4	6	0	4.44597	9	3.33333	-1.20645	0.127853	0.89329
Rps2	9	10	11	0	2	0	5.20256	10	0.666667	-2.72247	0.000501071	3.3001
Eif5a	5	8	4	3	5	4	1.7224	5.66667	4	-0.415037	0.303342	0.518068
Rap1b	20	30	16	3	5	4	10.8812	22	4	-2.20163	0.047162	1.32641
Vdac1	0	0	1	33	22	27	15.1976	0.333333	27.3333	4.40939	0.0128602	1.89075
Cand1	3	5	0	0	0	0	2.16025	2.66667	0	-1.87447	0.207882	0.682183
Gnai3	19	26	16	2	3	0	10.7703	20.3333	1.66667	-3	0.0176521	1.7532
Gnb1	13	20	15	11	12	7	4.3359	16	10	-0.628031	0.0867172	1.06189
Ehd2	34	42	18	0	0	0	18.822	31.3333	0	-5.01495	0.047145	1.32656
Psmd2	8	9	11	0	0	0	5.20256	9.33333	0	-3.36923	0.00881074	2.05499
Rps4x	6	6	6	0	3	0	2.94958	6	1	-1.80735	0.0377496	1.42309
Gpi	0	2	3	9	11	2	4.41588	1.66667	7.33333	1.64386	0.164492	0.783855
Vim	4	6	0	4	10	0	3.79473	3.33333	4.66667	0.387023	0.718882	0.143343
Mthfd1	4	5	10	0	0	0	4.02078	6.33333	0	-2.87447	0.0761884	1.11811
Atp1b3	8	6	7	18	21	6	6.69328	7	15	1	0.221542	0.654543
Gart	2	4	4	0	0	0	1.96638	3.33333	0	-2.11548	0.0377496	1.42309
Rack1	5	6	16	1	0	0	6.121	9	0.333333	-2.90689	0.131128	0.882303
Tpm4	1	1	1	16	14	3	7.04273	1	11	2.58496	0.131801	0.88008
Anxa4	14	14	18	1	1	1	7.9854	15.3333	1	-3.02975	0.0085426	2.06841
Epcam	22	21	33	9	15	0	11.431	25.3333	8	-1.54889	0.0414468	1.38251
Nme2	4	2	3	13	15	9	5.50151	3	12.3333	1.73697	0.0247943	1.60565
Sptbn1	0	0	0	6	6	0	3.09839	0	4	2.32193	0.183503	0.736356
Arrdc1	45	54	42	0	1	0	25.8663	47	0.333333	-5.16993	0.00558998	2.25259
Myh14	0	0	10	0	0	0	4.08248	3.33333	0	-2.11548	0.42265	0.374019
Nt5e	15	18	22	23	24	2	8.23812	18.3333	16.3333	-0.157541	0.810484	0.0912558
Niban2	7	8	6	0	0	0	3.88587	7	0	-3	0.00673408	2.17172
Loxl4	36	38	13	0	0	0	18.1521	29	0	-4.90689	0.0687061	1.163
Aldh2	0	0	3	4	5	8	3.07679	1	5.66667	1.73697	0.0422506	1.37417
Basp1	7	9	34	0	0	7	12.5976	16.6667	2.33333	-2.40599	0.236432	0.626294
Ahcy	10	8	12	2	3	0	4.83391	10	1.66667	-2.04439	0.00560173	2.25168
Hnrnpk	6	4	3	0	3	0	2.33809	4.33333	1	-1.41504	0.067738	1.16917
KRT14	8	8	0	31	31	0	14.3944	5.33333	20.6667	1.77444	0.27341	0.563185
Agrn	37	38	71	5	9	0	27.1784	48.6667	4.66667	-3.13171	0.0523065	1.28144
Calm1	6	10	8	25	24	9	8.50098	8	19.3333	1.17585	0.154389	0.811383
Cpne8	33	36	45	3	3	1	19.9441	38	2.33333	-3.54844	0.00834142	2.07876
Baiap2	15	13	30	1	0	1	11.7983	19.3333	0.666667	-3.60881	0.0730361	1.13646
Mov10	20	27	12	0	0	0	11.7714	19.6667	0	-4.36923	0.0452774	1.34412
Stip1	3	4	4	0	0	0	2.04124	3.66667	0	-2.22239	0.0081634	2.08813
Psat1	7	9	6	3	4	1	2.89828	7.33333	2.66667	-1.18442	0.0200921	1.69697
Impdh2	1	1	3	2	2	0	1.04881	1.66667	1.33333	-0.192645	0.741521	0.129877
Anxa11	17	18	21	4	0	0	9.69536	18.6667	1.33333	-3.07529	0.000677674	3.16898
Vps35	7	6	9	0	0	0	4.13118	7.33333	0	-3.05889	0.0141564	1.84905
H1-5	17	22	54	2	0	0	20.9229	31	0.666667	-4.26303	0.119754	0.921709
Cyfip1	19	27	18	0	0	0	12.0941	21.3333	0	-4.48113	0.0173595	1.76046
KRT5	12	9	0	31	43	0	17.4976	7	24.6667	1.68182	0.300087	0.522753
Prdx6	5	5	4	0	1	1	2.25093	4.66667	0.666667	-1.76553	0.00105756	2.97569
Npm1	5	4	3	4	6	0	2.06559	4	3.33333	-0.206451	0.74838	0.125878
Tpm1	2	1	1	11	14	1	5.89915	1.33333	8.66667	2.05063	0.202268	0.694072
Rab7a	16	19	16	0	0	0	9.3755	17	0	-4.16993	0.00344235	2.46314
Cse1l	3	1	2	0	0	0	1.26491	2	0	-1.58496	0.0741799	1.12971
Aars1	3	3	17	1	4	0	6.21825	7.66667	1.66667	-1.70044	0.326467	0.48616
Rpl4	8	8	11	0	1	0	4.88535	9	0.333333	-2.90689	0.00777851	2.1091
Prep	3	1	3	2	5	0	1.75119	2.33333	2.33333	0	1	0
Ddx3x	6	6	9	0	0	0	3.98748	7	0	-3	0.0198039	1.70325
Hnrnpu	5	6	4	0	0	0	2.81069	5	0	-2.58496	0.0130725	1.88364
Ncstn	7	8	5	37	44	2	18.3239	6.66667	27.6667	1.9027	0.247014	0.607279
Slc44a2	23	20	22	14	16	4	7.03562	21.6667	11.3333	-0.878009	0.101331	0.994257
Cap1	3	1	2	9	11	1	4.37035	2	7	1.41504	0.240837	0.618277
Rac1	13	17	16	11	10	5	4.38178	15.3333	8.66667	-0.756729	0.0480342	1.31845
Epb41l2	10	10	7	3	2	0	4.27395	9	1.66667	-1.90689	0.00557388	2.25384
Calr	0	0	0	3	4	3	1.8619	0	3.33333	2.11548	0.00985246	2.00646
Nme1	2	4	1	13	13	9	5.4037	2.33333	11.6667	1.926	0.00660546	2.1801
Rab1A	9	11	14	3	3	0	5.46504	11.3333	2	-2.03953	0.00850605	2.07027
Prdx2	6	4	3	6	6	8	1.76068	4.33333	6.66667	0.523562	0.107562	0.968342
Col4a2	24	24	8	8	7	0	9.8877	18.6667	5	-1.71272	0.10798	0.966656
Vdac2	0	0	0	31	37	17	16.8216	0	28.3333	4.87447	0.041062	1.38656
Pcbp2	16	16	6	1	2	0	7.38693	12.6667	1	-2.77259	0.0688175	1.1623
Esd	3	3	9	0	0	0	3.50714	5	0	-2.58496	0.129612	0.887356
Eif4g1	2	1	1	0	0	0	0.816497	1.33333	0	-1.22239	0.057191	1.24267
Mtap	8	3	6	5	7	1	2.60768	5.66667	4.33333	-0.321928	0.591981	0.227693
Gsn	5	7	5	1	1	1	2.65832	5.66667	1	-1.73697	0.0198039	1.70325
Rps3a	7	5	6	0	0	0	3.34664	6	0	-2.80735	0.00913261	2.03941
Gars1	5	3	11	0	0	0	4.35507	6.33333	0	-2.87447	0.118896	0.924832
Krt14	0	0	0	18	15	0	8.57321	0	11	3.58496	0.186857	0.728492
Ppp1ca	7	9	5	4	4	1	2.75681	7	3	-1	0.0601021	1.22111
Iars1	4	5	17	0	0	0	6.59293	8.66667	0	-3.27302	0.173666	0.760286
Rars1	2	1	0	0	0	0	0.83666	1	0	-1	0.225403	0.64704
Ptbp1	3	2	0	0	0	0	1.32916	1.66667	0	-1.41504	0.199359	0.700364
Glud1	0	0	0	22	14	10	9.24482	0	15.3333	4.02975	0.049067	1.30921
Rpl7	8	7	9	0	0	0	4.42719	8	0	-3.16993	0.00516799	2.28668
Rpl6	8	8	10	0	0	0	4.80278	8.66667	0	-3.27302	0.00586515	2.23172
Aco2	0	0	0	1	0	0	0.408248	0	0.333333	0.415037	0.42265	0.374019
Gpa33	10	12	14	20	18	5	5.45588	12	14.3333	0.23816	0.672896	0.172052
Rab10	9	13	14	3	3	0	5.83095	12	2	-2.11548	0.00823192	2.0845
Cdcp1	14	11	15	26	23	7	7.2111	13.3333	18.6667	0.456378	0.46279	0.334616
Ddx5	2	4	5	0	0	0	2.2286	3.66667	0	-2.22239	0.0532707	1.27351
Paics	5	9	1	1	0	0	3.61478	5	0.333333	-2.16993	0.178383	0.748647
KRT2	0	0	33	0	0	15	13.6382	11	5	-1	0.655931	0.183142
Rpl5	9	9	8	0	1	0	4.59347	8.66667	0.333333	-2.85798	6.0151e-05	4.22076
Xpo1	0	2	0	0	0	0	0.816497	0.666667	0	-0.736966	0.42265	0.374019
Tsg101	29	33	23	2	2	1	14.9533	28.3333	1.66667	-3.45943	0.0108825	1.96327
Septin7	3	3	5	1	1	0	1.83485	3.66667	0.666667	-1.48543	0.0285958	1.5437
Atp2b1	9	12	9	0	0	0	5.5857	10	0	-3.45943	0.00985246	2.00646
Rpl7a	7	6	8	0	2	0	3.60093	7	0.666667	-2.26303	0.00215026	2.66751
Lgals3bp	37	40	44	2	3	0	21.3167	40.3333	1.66667	-3.9542	0.000696446	3.15711
Ppib	3	1	1	17	15	8	7.09225	1.66667	13.3333	2.42626	0.0438325	1.3582
Gja1	29	31	10	0	0	2	14.4361	23.3333	0.666667	-3.8679	0.075788	1.1204
Slc1a5	17	15	20	9	8	5	5.85377	17.3333	7.33333	-1.1375	0.006687	2.17477
Slc25a5	3	2	0	1	3	1	1.21106	1.66667	1.66667	0	1	0
Arf3	13	14	9	1	3	0	6.15359	12	1.33333	-2.47805	0.00751564	2.12403
Pcbp1	8	9	4	1	1	0	3.86868	7	0.666667	-2.26303	0.0478908	1.31975
Ddb1	0	0	0	7	7	0	3.61478	0	4.66667	2.5025	0.183503	0.736356
Upf1	3	3	4	4	4	0	1.54919	3.33333	2.66667	-0.241008	0.670813	0.173398
Rpsa	3	4	14	1	2	0	5.09902	7	1	-2	0.227462	0.643091
Cxadr	8	9	14	25	33	6	10.8336	10.3333	21.3333	0.978626	0.301629	0.520527
Glg1	7	7	3	21	23	6	8.54205	5.66667	16.6667	1.40599	0.17072	0.767716
Cd44	15	14	20	1	1	1	8.64099	16.3333	1	-3.11548	0.014336	1.84357
Abce1	4	4	8	0	0	0	3.26599	5.33333	0	-2.66297	0.057191	1.24267
Dip2b	29	32	31	5	5	0	15.1129	30.6667	3.33333	-2.86942	0.000664751	3.17734
Slc25a4	3	0	0	3	4	2	1.67332	1	3	1	0.175936	0.754644
Pfkl	1	3	5	0	0	0	2.07364	3	0	-2	0.12169	0.914745
Capn5	26	35	25	0	0	0	16.0831	28.6667	0	-4.89077	0.0120814	1.91788
Pgd	4	5	3	0	0	1	2.13698	4	0.333333	-1.90689	0.00996386	2.00157
Pxdn	35	36	12	1	1	0	17.1046	27.6667	0.666667	-4.10434	0.0746739	1.12683
Tars1	0	2	3	4	4	0	1.83485	1.66667	2.66667	0.459432	0.570384	0.243833
Rps9	6	5	9	0	3	0	3.54495	6.66667	1	-1.9386	0.0235436	1.62813
Eif3l	3	4	13	0	0	0	5.04645	6.66667	0	-2.9386	0.170973	0.767072
Rpl3	7	8	7	0	0	0	4.0332	7.33333	0	-3.05889	0.00205973	2.68619
Psmc2	4	4	7	0	0	0	2.94958	5	0	-2.58496	0.0377496	1.42309
Kif5b	3	4	1	0	0	0	1.75119	2.66667	0	-1.87447	0.0941784	1.02605
Pa2g4	4	2	5	0	0	0	2.2286	3.66667	0	-2.22239	0.0532707	1.27351
Aprt	8	6	11	0	0	0	4.83391	8.33333	0	-3.22239	0.0290805	1.5364
Pdia6	1	2	1	0	1	1	0.632456	1.33333	0.666667	-0.485427	0.2302	0.637895
Syncrip	3	4	2	1	2	0	1.41421	3	1	-1	0.070484	1.15191
Col7a1	14	19	7	1	1	0	7.92465	13.3333	0.666667	-3.10434	0.0666112	1.17645
Septin2	4	3	10	3	3	1	3.09839	5.66667	2.33333	-1	0.263296	0.579556
Rhoa	9	10	14	2	2	0	5.6006	11	1.33333	-2.36257	0.0131009	1.8827
Ppid	2	1	0	0	0	0	0.83666	1	0	-1	0.225403	0.64704
Gpc1	17	20	39	0	0	0	15.7945	25.3333	0	-4.71882	0.0666236	1.17637
Kars1	0	1	7	0	1	0	2.73861	2.66667	0.333333	-1.45943	0.397729	0.400413
Canx	0	1	0	2	3	1	1.16905	0.333333	2	1.16993	0.0824417	1.08385
Nckap1	12	16	13	0	0	0	7.60044	13.6667	0	-3.87447	0.00764492	2.11663
Fkbp4	1	0	1	1	4	0	1.47196	0.666667	1.66667	0.678072	0.496958	0.303681
Eftud2	4	4	5	0	0	0	2.40139	4.33333	0	-2.41504	0.00586515	2.23172
Cdk1	4	5	3	0	0	0	2.28035	4	0	-2.32193	0.0202041	1.69456
	14	15	0	14	25	0	9.7091	9.66667	13	0.392317	0.723922	0.140308
Lcp1	0	0	0	14	13	0	6.97854	0	9	3.32193	0.184063	0.735034
Hsph1	3	3	3	0	0	0	1.64317	3	0	-2	0	inf
Rps7	2	4	1	0	1	0	1.50555	2.33333	0.333333	-1.32193	0.139435	0.855628
Fdps	3	3	3	0	0	0	1.64317	3	0	-2	0	inf
Sars1	2	1	11	0	0	0	4.32049	4.66667	0	-2.5025	0.279918	0.55297
Shmt2	0	0	3	1	1	1	1.09545	1	1	0	1	0
Ralb	11	12	13	4	4	0	5.35413	12	2.66667	-1.82597	0.0101744	1.99249
Kif23	5	10	1	3	3	0	3.55903	5.33333	2	-1.078	0.330315	0.481071
Ipo7	2	2	3	0	0	0	1.32916	2.33333	0	-1.73697	0.0198039	1.70325
Ganab	0	0	1	0	0	0	0.408248	0.333333	0	-0.415037	0.42265	0.374019
Prom2	27	25	40	0	0	0	17.5689	30.6667	0	-4.98489	0.0227134	1.64372
Vat1	6	5	2	14	13	2	5.2915	4.33333	9.66667	1	0.297958	0.525844
Arhgdia	2	3	0	7	7	1	3.01109	1.66667	5	1.16993	0.232673	0.633254
Rplp0	4	4	4	0	2	0	1.96638	4	0.666667	-1.58496	0.0377496	1.42309
Actr3	2	3	2	0	0	1	1.21106	2.33333	0.333333	-1.32193	0.0132356	1.87826
Rab14	8	11	9	0	0	0	5.20256	9.33333	0	-3.36923	0.00881074	2.05499
Prpf8	5	7	6	0	0	0	3.34664	6	0	-2.80735	0.00913261	2.03941
Dstn	1	2	5	1	1	1	1.60208	2.66667	1	-0.874469	0.29986	0.523082
Copg1	2	1	3	0	0	0	1.26491	2	0	-1.58496	0.0741799	1.12971
Mthfd1l	0	0	0	0	1	0	0.408248	0	0.333333	0.415037	0.42265	0.374019
Rps8	12	11	9	0	1	0	5.75326	10.6667	0.333333	-3.12928	0.0032196	2.4922
Eif3c	5	4	8	0	0	0	3.37145	5.66667	0	-2.73697	0.0421585	1.37511
Copa	1	0	8	0	0	0	3.20936	3	0	-2	0.355497	0.449165
Snrnp200	2	1	15	0	0	0	5.93296	6	0	-2.80735	0.314752	0.502032
Dnaja2	9	12	6	2	2	0	4.66548	9	1.33333	-2.09954	0.0342489	1.46535
Ruvbl1	6	6	8	0	0	0	3.7238	6.66667	0	-2.9386	0.00985246	2.00646
G6pdx	1	1	3	0	0	0	1.16905	1.66667	0	-1.41504	0.129612	0.887356
H2-D1	7	8	9	18	17	5	5.46504	8	13.3333	0.671377	0.329328	0.482371
Rab11b	10	10	11	0	1	0	5.50151	10.3333	0.333333	-3.08746	2.91957e-05	4.53468
Rtn4	3	3	4	0	0	0	1.8619	3.33333	0	-2.11548	0.00985246	2.00646
Yes1	14	17	10	3	6	2	6.0553	13.6667	3.66667	-1.65208	0.0203964	1.69045
Septin11	3	3	2	1	2	0	1.16905	2.66667	1	-0.874469	0.0824417	1.08385
Kpna2	3	2	0	0	0	0	1.32916	1.66667	0	-1.41504	0.199359	0.700364
KRT17	0	0	0	18	14	0	8.35863	0	10.6667	3.54432	0.189809	0.721684
Slc16a1	8	9	11	5	4	2	3.39116	9.33333	3.66667	-1.14684	0.0104697	1.98007
Itgb5	16	22	18	4	9	0	8.57321	18.6667	4.33333	-1.88264	0.0139275	1.85613
Prdx3	0	0	0	22	27	10	12.1065	0	19.6667	4.36923	0.0599325	1.22234
Trap1	0	0	2	0	3	0	1.32916	0.666667	1	0.263034	0.797171	0.0984485
Hbb-b1	0	0	0	0	0	53	21.6372	0	17.6667	4.22239	0.42265	0.374019
Rps18	7	6	6	0	4	0	3.12517	6.33333	1.33333	-1.65208	0.0568154	1.24553
Tjp2	2	6	3	0	0	1	2.28035	3.66667	0.333333	-1.80735	0.0999741	1.00011
Sdha	0	0	0	10	17	1	7.20185	0	9.33333	3.36923	0.181413	0.741333
Ran	6	5	10	0	2	0	3.92003	7	0.666667	-2.26303	0.03755	1.42539
Lap3	0	0	0	6	6	5	3.12517	0	5.66667	2.73697	0.00344235	2.46314
H2-K1	6	9	7	15	11	1	4.75044	7.33333	9	0.263034	0.730346	0.136471
Gstp1	3	3	2	1	1	1	0.983192	2.66667	1	-0.874469	0.0377496	1.42309
Stom	7	6	4	19	25	3	9.09212	5.66667	15.6667	1.32193	0.266069	0.575006
Rps16	5	5	7	0	2	0	2.92689	5.66667	0.666667	-2	0.00607361	2.21655
Kirrel1	19	23	15	11	14	1	7.54763	19	8.66667	-1.04891	0.101812	0.992199
Dhx15	1	2	8	0	0	0	3.12517	3.66667	0	-2.22239	0.235447	0.628107
Afdn	4	4	5	3	3	1	1.36626	4.33333	2.33333	-0.678072	0.0764504	1.11662
Nedd4	6	9	1	0	1	0	3.76386	5.33333	0.333333	-2.24793	0.162936	0.787984
Got1	1	0	0	9	11	0	5.0892	0.333333	6.66667	2.52356	0.20106	0.696675
Dars1	5	4	16	0	0	0	6.21021	8.33333	0	-3.22239	0.162468	0.789231
Ap2a1	9	9	4	0	0	0	4.4121	7.33333	0	-3.05889	0.0479669	1.31906
Gmps	1	1	5	0	0	0	1.94079	2.33333	0	-1.73697	0.222222	0.653213
Psmd11	5	3	3	0	0	0	2.13698	3.66667	0	-2.22239	0.031504	1.50163
Lars1	2	1	7	0	0	0	2.73252	3.33333	0	-2.11548	0.214326	0.668926
Ide	0	0	1	0	0	0	0.408248	0.333333	0	-0.415037	0.42265	0.374019
Acaca	0	0	22	0	0	0	8.98146	7.33333	0	-3.05889	0.42265	0.374019
Atp1b1	5	3	7	16	20	5	6.94742	5	13.6667	1.28951	0.187151	0.727807
Cdh1	17	18	23	0	1	0	10.6097	19.3333	0.333333	-3.93074	0.00784362	2.10548
Asns	4	5	10	0	0	0	4.02078	6.33333	0	-2.87447	0.0761884	1.11811
Hnrnpf	4	4	1	0	0	0	1.97484	3	0	-2	0.095466	1.02015
Eif2s3x	1	0	3	1	1	0	1.09545	1.33333	0.666667	-0.485427	0.538386	0.268906
Wwp2	17	22	18	0	0	0	10.5404	19	0	-4.32193	0.00640153	2.19372
Hadha	0	0	0	1	0	0	0.408248	0	0.333333	0.415037	0.42265	0.374019
Ftl1	6	3	6	14	16	0	6.253	5	10	0.874469	0.426147	0.37044
Eif3b	2	3	5	0	0	0	2.06559	3.33333	0	-2.11548	0.0634142	1.19781
Ppa1	0	0	2	0	0	0	0.816497	0.666667	0	-0.736966	0.42265	0.374019
Arpc2	0	0	2	0	0	0	0.816497	0.666667	0	-0.736966	0.42265	0.374019
Ly75	7	15	5	9	7	1	4.63321	9	5.66667	-0.584963	0.442003	0.354575
Ybx1	4	5	7	0	1	0	2.92689	5.33333	0.333333	-2.24793	0.0193257	1.71386
Mars1	1	2	8	0	0	0	3.12517	3.66667	0	-2.22239	0.235447	0.628107
Rnh1	1	1	0	0	0	0	0.516398	0.666667	0	-0.736966	0.183503	0.736356
NARS1	0	1	8	0	0	0	3.20936	3	0	-2	0.355497	0.449165
Ddx1	0	1	0	0	0	0	0.408248	0.333333	0	-0.415037	0.42265	0.374019
Plcb3	4	5	4	1	0	1	2.07364	4.33333	0.666667	-1.67807	0.00147312	2.83176
Gsr	1	1	1	16	17	2	7.89092	1	11.6667	2.66297	0.158477	0.800033
Txnrd1	1	1	1	7	12	1	4.66548	1	6.66667	1.9386	0.216681	0.664178
Rab5c	10	11	11	0	0	0	5.85377	10.6667	0	-3.54432	0.000975134	3.01094
Rab8a	7	9	14	0	0	0	5.93296	10	0	-3.45943	0.0407058	1.39034
Eif2s1	1	1	2	0	1	0	0.752773	1.33333	0.333333	-0.807355	0.101192	0.994856
Lrp1	2	2	8	26	34	0	14.4222	4	20	2.07039	0.257062	0.589962
Ap2a2	9	10	2	1	1	0	4.44597	7	0.666667	-2.26303	0.125841	0.900177
Anxa7	7	9	11	0	0	0	5.0892	9	0	-3.32193	0.0160653	1.79411
Dock9	20	20	8	0	0	0	9.79796	16	0	-4.08746	0.057191	1.24267
Sf3b1	4	3	6	0	0	0	2.56255	4.33333	0	-2.41504	0.0390123	1.4088
Tspan14	28	27	20	0	0	1	13.7937	25	0.333333	-4.2854	0.00930195	2.03143
Prdx5	0	0	1	9	13	5	5.39135	0.333333	9	2.90689	0.0614588	1.21142
Rps5	3	3	6	0	0	0	2.44949	4	0	-2.32193	0.057191	1.24267
Itch	18	22	15	0	0	0	10.2843	18.3333	0	-4.27302	0.0120115	1.9204
Adss2	2	1	0	0	0	0	0.83666	1	0	-1	0.225403	0.64704
Capn2	0	1	1	0	0	0	0.516398	0.666667	0	-0.736966	0.183503	0.736356
Vdac3	0	0	0	17	16	11	8.28654	0	14.6667	3.96963	0.0156378	1.80582
Atp2a2	0	0	0	3	2	1	1.26491	0	2	1.58496	0.0741799	1.12971
Ist1	13	13	17	0	0	0	7.9854	14.3333	0	-3.9386	0.0085426	2.06841
Top1	12	12	17	0	0	0	7.70498	13.6667	0	-3.87447	0.0145483	1.83719
Pcna	1	2	1	0	0	0	0.816497	1.33333	0	-1.22239	0.057191	1.24267
Hnrnph1	5	4	0	0	1	0	2.25093	3	0.333333	-1.58496	0.219259	0.659043
Ogdh	0	0	0	2	3	4	1.76068	0	3	2	0.0350987	1.45471
Prdx4	0	0	0	10	13	6	5.74166	0	9.66667	3.41504	0.0412896	1.38416
Lamp1	7	9	6	17	21	6	6.41872	7.33333	14.6667	0.910733	0.240951	0.618071
Ptk7	19	20	12	4	4	0	8.44788	17	2.66667	-2.29546	0.0146351	1.8346
Psmc3	3	3	4	1	1	0	1.54919	3.33333	0.666667	-1.37851	0.00481268	2.31761
Cyrib	3	4	4	0	0	0	2.04124	3.66667	0	-2.22239	0.0081634	2.08813
Ctps1	1	0	10	0	0	0	4.02078	3.66667	0	-2.22239	0.368067	0.434074
Hars1	0	0	0	5	8	0	3.48807	0	4.33333	2.41504	0.204413	0.689492
Pgls	1	2	0	0	0	0	0.83666	1	0	-1	0.225403	0.64704
Dnm1l	1	1	0	0	0	0	0.516398	0.666667	0	-0.736966	0.183503	0.736356
Cpne3	7	7	6	3	2	1	2.65832	6.66667	2	-1.35364	0.00483389	2.3157
Asah1	1	1	1	21	24	5	10.7409	1	16.6667	3.14296	0.117283	0.930764
Gsto1	1	2	3	0	0	1	1.16905	2	0.333333	-1.16993	0.0824417	1.08385
Serpinh1	2	3	1	0	0	0	1.26491	2	0	-1.58496	0.0741799	1.12971
Gusb	0	0	0	26	29	0	14.2326	0	18.3333	4.27302	0.184715	0.733497
Tjp1	6	4	3	2	2	1	1.78885	4.33333	1.66667	-1	0.0796756	1.09867
Mdh1	0	1	1	8	10	1	4.32435	0.666667	6.33333	2.1375	0.171672	0.7653
Serpinb6	1	0	2	4	6	1	2.25093	1	3.66667	1.22239	0.199844	0.699309
Eef1d	1	1	4	1	1	0	1.36626	2	0.666667	-0.847997	0.313273	0.504078
Ola1	4	2	2	0	0	0	1.63299	2.66667	0	-1.87447	0.057191	1.24267
Dpysl2	1	1	5	0	0	0	1.94079	2.33333	0	-1.73697	0.222222	0.653213
Myl6	2	2	1	0	2	3	1.0328	1.66667	1.66667	0	1	0
Hnrnpa2b1	2	3	1	0	2	0	1.21106	2	0.666667	-0.847997	0.206526	0.685026
Ddx39a	0	0	3	0	0	0	1.22474	1	0	-1	0.42265	0.374019
Dld	0	0	0	10	10	9	5.30723	0	9.66667	3.41504	0.00118694	2.92557
Ddx17	2	3	6	0	0	0	2.40139	3.66667	0	-2.22239	0.0927353	1.03275
Top2a	5	7	2	0	0	0	3.01109	4.66667	0	-2.5025	0.0847914	1.07165
Mcm2	1	0	1	0	0	0	0.516398	0.666667	0	-0.736966	0.183503	0.736356
Psma7	2	1	1	4	4	1	1.47196	1.33333	3	0.777608	0.232151	0.63423
Eps8l2	2	4	8	0	0	0	3.20416	4.66667	0	-2.5025	0.118083	0.927813
Rpl9	2	3	2	0	0	0	1.32916	2.33333	0	-1.73697	0.0198039	1.70325
Pdia4	0	0	0	1	2	0	0.83666	0	1	1	0.225403	0.64704
Sec31a	0	0	1	0	0	0	0.408248	0.333333	0	-0.415037	0.42265	0.374019
Tf	1	0	0	0	0	64	26.0493	0.333333	21.3333	4.06609	0.428715	0.367832
Pacsin2	9	9	5	1	1	2	3.78153	7.66667	1.33333	-1.89308	0.0350585	1.45521
Akr1b1	1	2	4	4	6	1	2	2.33333	3.66667	0.485427	0.485249	0.314035
H2-L	7	7	8	11	11	0	4.0332	7.33333	7.33333	0	1	0
Itga5	9	11	12	6	7	1	3.9833	10.6667	4.66667	-1.04182	0.0652057	1.18571
Capg	2	2	1	0	1	0	0.894427	1.66667	0.333333	-1	0.0474207	1.32403
Myo1b	2	6	3	1	1	0	2.13698	3.66667	0.666667	-1.48543	0.121203	0.916486
Pkp3	11	10	9	0	0	0	5.51362	10	0	-3.45943	0.00331676	2.47929
Nap1l1	1	1	3	0	0	0	1.16905	1.66667	0	-1.41504	0.129612	0.887356
Ddx39b	1	1	2	0	1	0	0.752773	1.33333	0.333333	-0.807355	0.101192	0.994856
Npepps	0	1	1	0	0	0	0.516398	0.666667	0	-0.736966	0.183503	0.736356
Ecpas	0	0	1	0	0	0	0.408248	0.333333	0	-0.415037	0.42265	0.374019
Aldh18a1	1	0	0	0	1	0	0.516398	0.333333	0.333333	0	1	0
Fermt1	13	18	11	5	4	0	6.65582	14	3	-1.90689	0.0156734	1.80484
Slc44a1	13	12	11	9	12	0	4.84768	12	7	-0.70044	0.298811	0.524604
Pak2	2	1	1	0	0	0	0.816497	1.33333	0	-1.22239	0.057191	1.24267
Rpl10a	11	10	5	0	0	0	5.16398	8.66667	0	-3.27302	0.0429268	1.36727
Psmd3	1	2	2	0	0	0	0.983192	1.66667	0	-1.41504	0.0377496	1.42309
Dhx9	2	5	6	0	0	0	2.71416	4.33333	0	-2.41504	0.0690507	1.16083
Psmd1	0	0	3	0	0	0	1.22474	1	0	-1	0.42265	0.374019
Pebp1	3	3	3	2	0	3	1.21106	3	1.66667	-0.584963	0.269703	0.569114
Cd9	14	19	12	0	0	0	8.52643	15	0	-4	0.0187202	1.72769
Nrp2	15	20	10	2	2	0	8.15884	15	1.33333	-2.77761	0.0361281	1.44216
Hnrnpab	4	6	0	0	0	0	2.65832	3.33333	0	-2.11548	0.199359	0.700364
Sh3gl1	7	10	6	0	0	0	4.40076	7.66667	0	-3.11548	0.0237044	1.62517
Etf1	0	1	0	1	1	0	0.547723	0.333333	0.666667	0.321928	0.518519	0.285236
Ephb2	10	12	5	10	10	2	3.81663	9	7.33333	-0.263034	0.649503	0.187419
Psmd12	3	3	3	0	0	0	1.64317	3	0	-2	0	inf
Dnm2	0	0	2	0	0	0	0.816497	0.666667	0	-0.736966	0.42265	0.374019
Src	8	12	12	2	2	2	4.96655	10.6667	2	-1.95936	0.0228602	1.64092
Dnaja1	8	10	9	1	1	0	4.62241	9	0.666667	-2.58496	0.000799245	3.09732
Rplp2	2	2	0	0	4	0	1.63299	1.33333	1.33333	0	1	0
Pgm1	0	2	0	0	1	0	0.83666	0.666667	0.333333	-0.321928	0.685598	0.16393
Hnrnpa1	1	1	0	0	1	0	0.547723	0.666667	0.333333	-0.321928	0.518519	0.285236
Hmgb1	2	2	1	0	0	0	0.983192	1.66667	0	-1.41504	0.0377496	1.42309
Lamp2	3	4	6	16	21	5	7.46771	4.33333	14	1.49185	0.173687	0.760233
Rpl17	3	6	7	0	0	0	3.20416	5.33333	0	-2.66297	0.0472139	1.32593
Psme1	1	0	0	0	0	0	0.408248	0.333333	0	-0.415037	0.42265	0.374019
Uggt1	0	0	0	6	8	0	3.6697	0	4.66667	2.5025	0.19171	0.717356
Ddx21	1	0	0	0	0	0	0.408248	0.333333	0	-0.415037	0.42265	0.374019
Rab2a	4	5	7	0	0	0	3.07679	5.33333	0	-2.66297	0.026271	1.58052
Rps11	5	6	7	0	1	0	3.18852	6	0.333333	-2.39232	0.00266492	2.57432
Ssb	2	3	3	0	0	0	1.50555	2.66667	0	-1.87447	0.0152681	1.81622
Tnpo1	0	3	1	0	0	0	1.21106	1.33333	0	-1.22239	0.269703	0.569114
Eef1b	1	1	0	0	0	0	0.516398	0.666667	0	-0.736966	0.183503	0.736356
Rcc2	0	1	6	0	0	0	2.40139	2.33333	0	-1.73697	0.335589	0.474192
Igsf3	24	23	14	0	0	0	11.669	20.3333	0	-4.41504	0.0235937	1.6272
Tpt1	1	2	1	1	2	1	0.516398	1.33333	1.33333	0	1	0
Clic4	2	1	3	1	1	0	1.0328	2	0.666667	-0.847997	0.133583	0.874248
Cnn3	2	3	1	0	1	0	1.16905	2	0.333333	-1.16993	0.0824417	1.08385
Rps13	3	3	1	0	1	0	1.36626	2.33333	0.333333	-1.32193	0.0764504	1.11662
Acsl4	4	7	3	0	1	0	2.73861	4.66667	0.333333	-2.08746	0.060003	1.22183
Dlst	0	0	0	10	14	3	6.05805	0	9	3.32193	0.107408	0.968965
Psmc1	3	4	5	0	0	0	2.28035	4	0	-2.32193	0.0202041	1.69456
Xpnpep1	2	3	2	0	0	0	1.32916	2.33333	0	-1.73697	0.0198039	1.70325
Hnrnpa3	4	3	0	0	0	0	1.83485	2.33333	0	-1.73697	0.19171	0.717356
Hmgb2	0	1	2	0	0	0	0.83666	1	0	-1	0.225403	0.64704
Psma6	1	2	4	4	4	0	1.76068	2.33333	2.66667	0.137504	0.846485	0.0723807
Slc9a3r1	2	5	16	1	1	0	6.04704	7.66667	0.666667	-2.37851	0.241227	0.617575
Plscr3	12	10	8	6	7	2	3.44964	10	5	-0.874469	0.0638112	1.1951
Rpl18	6	4	9	0	0	0	3.81663	6.33333	0	-2.87447	0.0488103	1.31149
Prmt1	1	1	6	0	0	0	2.33809	2.66667	0	-1.87447	0.250731	0.600791
Umps	1	0	1	0	0	0	0.516398	0.666667	0	-0.736966	0.183503	0.736356
Ppp2ca	1	2	6	3	2	0	2.06559	3	1.66667	-0.584963	0.501471	0.299754
Rps6	3	5	8	0	1	0	3.18852	5.33333	0.333333	-2.24793	0.0683885	1.16502
Cep55	11	11	6	0	0	0	5.42832	9.33333	0	-3.36923	0.0304393	1.51657
Ruvbl2	5	2	4	0	0	0	2.2286	3.66667	0	-2.22239	0.0532707	1.27351
Eif3e	0	0	4	0	0	0	1.63299	1.33333	0	-1.22239	0.42265	0.374019
Psmd6	3	2	2	0	0	0	1.32916	2.33333	0	-1.73697	0.0198039	1.70325
Strap	0	0	2	1	3	0	1.26491	0.666667	1.33333	0.485427	0.581288	0.235609
Atp6v1a	0	1	1	0	0	0	0.516398	0.666667	0	-0.736966	0.183503	0.736356
Rangap1	0	1	0	0	1	0	0.516398	0.333333	0.333333	0	1	0
Rps25	3	4	4	0	1	0	1.89737	3.66667	0.333333	-1.80735	0.00211065	2.67558
Rras2	9	12	8	0	0	0	5.45588	9.66667	0	-3.41504	0.0151084	1.82078
Racgap1	2	5	0	5	4	2	2	2.33333	3.66667	0.485427	0.485249	0.314035
Psmc5	2	2	5	0	0	0	1.97484	3	0	-2	0.095466	1.02015
Mmp9	10	12	3	1	0	0	5.31664	8.33333	0.333333	-2.80735	0.0971766	1.01244
Ube2l3	2	3	1	1	0	1	1.0328	2	0.666667	-0.847997	0.133583	0.874248
Rras	11	10	10	1	1	0	5.31977	10.3333	0.666667	-2.76553	3.34014e-05	4.47623
Gna11	7	8	5	1	1	0	3.4448	6.66667	0.666667	-2.20163	0.0124364	1.90531
Arpc1b	1	1	3	0	0	0	1.16905	1.66667	0	-1.41504	0.129612	0.887356
C3	0	6	5	4	6	15	4.93964	3.66667	8.33333	1	0.310499	0.50794
Ccn1	18	20	6	3	3	0	8.50098	14.6667	2	-2.38466	0.0946137	1.02405
Psmd13	1	1	5	0	0	0	1.94079	2.33333	0	-1.73697	0.222222	0.653213
Galnt7	0	0	0	25	17	6	10.6395	0	16	4.08746	0.100878	0.996205
Usp14	1	2	0	1	1	0	0.752773	1	0.666667	-0.263034	0.64945	0.187454
Cfl2	2	3	4	0	0	0	1.76068	3	0	-2	0.0350987	1.45471
Rpl12	2	2	1	0	0	0	0.983192	1.66667	0	-1.41504	0.0377496	1.42309
Flot2	14	12	9	0	1	0	6.41872	11.6667	0.333333	-3.24793	0.0126451	1.89808
Slc25a3	2	1	0	1	2	0	0.894427	1	1	0	1	0
Ugdh	0	0	1	0	0	0	0.408248	0.333333	0	-0.415037	0.42265	0.374019
Ephb4	14	18	9	0	2	0	7.70498	13.6667	0.666667	-3.1375	0.031324	1.50412
Glb1	0	0	1	21	30	0	13.3517	0.333333	17	3.75489	0.201456	0.69582
F11r	8	8	7	11	14	1	4.35507	7.66667	8.66667	0.157541	0.823232	0.084478
Cd151	7	7	17	3	4	3	5.30723	10.3333	3.33333	-1.38702	0.169337	0.771249
Bmp1	17	13	15	2	2	0	7.62671	15	1.33333	-2.77761	0.00148939	2.82699
Fmnl2	11	11	9	0	0	0	5.70672	10.3333	0	-3.5025	0.00413652	2.38336
Nedd4l	16	19	14	0	0	0	9.08662	16.3333	0	-4.11548	0.00782066	2.10676
Naa15	0	0	3	0	0	0	1.22474	1	0	-1	0.42265	0.374019
Lgals3	0	1	1	6	6	1	2.73861	0.666667	4.33333	1.67807	0.154202	0.811911
Nudc	1	0	0	2	2	0	0.983192	0.333333	1.33333	0.807355	0.273893	0.562419
St14	13	13	9	3	4	0	5.47723	11.6667	2.33333	-1.926	0.00671095	2.17322
Dnmt1	0	1	0	0	0	0	0.408248	0.333333	0	-0.415037	0.42265	0.374019
Psmc6	4	4	4	1	1	0	1.8619	4	0.666667	-1.58496	0.00985246	2.00646
Gna13	6	8	6	0	0	0	3.7238	6.66667	0	-2.9386	0.00985246	2.00646
Slk	0	0	1	0	0	0	0.408248	0.333333	0	-0.415037	0.42265	0.374019
Psma2	2	2	2	1	1	0	0.816497	2	0.666667	-0.847997	0.057191	1.24267
Set	2	2	0	2	2	0	1.0328	1.33333	1.33333	0	1	0
Hspe1	0	0	0	2	2	7	2.71416	0	3.66667	2.22239	0.158809	0.799125
Stxbp2	3	6	1	0	0	0	2.42212	3.33333	0	-2.11548	0.148743	0.827562
Nt5c2	0	1	2	0	0	0	0.83666	1	0	-1	0.225403	0.64704
Sf3b3	2	0	3	0	0	0	1.32916	1.66667	0	-1.41504	0.199359	0.700364
Tacstd2	5	6	7	9	12	3	3.16228	6	8	0.36257	0.53122	0.274726
Dlat	2	1	1	4	4	3	1.3784	1.33333	3.66667	1	0.0077626	2.10999
Vps4b	6	8	8	0	0	0	4.08248	7.33333	0	-3.05889	0.0081634	2.08813
Isyna1	0	0	0	5	4	1	2.25093	0	3.33333	2.11548	0.109129	0.962059
Lsr	11	12	15	1	2	1	6.3561	12.6667	1.33333	-2.5502	0.00745455	2.12758
Itgb6	6	6	12	8	12	1	4.1833	8	7	-0.169925	0.807121	0.0930614
Alcam	5	7	4	6	10	0	3.32666	5.33333	5.33333	0	1	0
Psma1	0	0	3	2	2	0	1.32916	1	1.33333	0.222392	0.797171	0.0984485
Ttyh3	14	15	24	0	0	0	10.2843	17.6667	0	-4.22239	0.0309021	1.51001
Plau	15	14	17	0	0	0	8.4538	15.3333	0	-4.02975	0.0032918	2.48257
Prpf19	0	0	4	0	0	0	1.63299	1.33333	0	-1.22239	0.42265	0.374019
Casp3	2	0	1	3	3	1	1.21106	1	2.33333	0.736966	0.206526	0.685026
Psma4	1	1	2	6	6	0	2.65832	1.33333	4	1.09954	0.313111	0.504302
Sod1	1	0	0	10	11	2	5.09902	0.333333	7.66667	2.70044	0.121602	0.915058
Otub1	5	4	2	0	0	0	2.2286	3.66667	0	-2.22239	0.0532707	1.27351
Cd82	8	9	13	11	10	1	4.13118	10	7.33333	-0.400538	0.506783	0.295178
Uqcrc1	0	0	0	1	1	1	0.547723	0	1	1	0	inf
Prps1	0	1	2	0	0	0	0.83666	1	0	-1	0.225403	0.64704
Uba2	2	2	3	0	0	0	1.32916	2.33333	0	-1.73697	0.0198039	1.70325
Entpd3	7	8	0	15	14	0	6.50128	5	9.66667	0.830075	0.455175	0.341821
Xpo5	1	0	0	0	0	0	0.408248	0.333333	0	-0.415037	0.42265	0.374019
Gfm1	0	0	0	14	15	5	7.11805	0	11.3333	3.62449	0.0704969	1.15183
Lyn	11	10	6	0	0	0	5.20577	9	0	-3.32193	0.0276188	1.5588
Qars1	0	0	3	0	0	0	1.22474	1	0	-1	0.42265	0.374019
Pfas	0	0	1	0	0	0	0.408248	0.333333	0	-0.415037	0.42265	0.374019
Fabp5	1	2	3	3	4	1	1.21106	2	2.66667	0.289507	0.566567	0.246749
Ube2n	1	1	2	0	1	0	0.752773	1.33333	0.333333	-0.807355	0.101192	0.994856
Adgrl2	7	6	4	7	8	0	2.94392	5.66667	5	-0.152003	0.821793	0.0852375
Capza1	3	4	0	0	0	0	1.83485	2.33333	0	-1.73697	0.19171	0.717356
Plxna1	11	11	8	1	1	0	5.24087	10	0.666667	-2.72247	0.00652191	2.18563
Capza2	2	2	0	0	0	0	1.0328	1.33333	0	-1.22239	0.183503	0.736356
Vcam1	4	6	8	7	8	0	3.08221	6	5	-0.222392	0.743441	0.128753
Eif4a3	3	2	4	0	0	0	1.76068	3	0	-2	0.0350987	1.45471
Copb1	0	0	2	0	0	0	0.816497	0.666667	0	-0.736966	0.42265	0.374019
Ubr4	0	0	8	0	0	0	3.26599	2.66667	0	-1.87447	0.42265	0.374019
Ldlr	5	6	2	11	13	2	4.59347	4.33333	8.66667	0.857981	0.329266	0.482454
Capzb	1	1	0	0	2	0	0.816497	0.666667	0.666667	0	1	0
Nampt	0	0	0	0	2	0	0.816497	0	0.666667	0.736966	0.42265	0.374019
Clu	13	12	22	0	0	0	9.26103	15.6667	0	-4.05889	0.0388126	1.41103
Rps17	0	0	1	0	0	0	0.408248	0.333333	0	-0.415037	0.42265	0.374019
Vps37b	12	17	16	0	0	0	8.38451	15	0	-4	0.0102118	1.9909
Mapk1	0	1	2	1	3	0	1.16905	1	1.33333	0.222392	0.770026	0.113495
Pafah1b1	0	0	1	0	1	0	0.516398	0.333333	0.333333	0	1	0
Rhog	8	7	8	0	0	0	4.21505	7.66667	0	-3.11548	0.00188502	2.72469
Ddost	0	0	0	3	3	3	1.64317	0	3	2	0	inf
Vps37c	17	19	15	0	0	0	9.39681	17	0	-4.16993	0.00458193	2.33895
Txnl1	0	1	0	0	0	0	0.408248	0.333333	0	-0.415037	0.42265	0.374019
Eps8	8	7	21	0	0	0	8.22192	12	0	-3.70044	0.116947	0.932013
Septin9	0	0	2	0	0	0	0.816497	0.666667	0	-0.736966	0.42265	0.374019
Slc2a1	7	7	7	2	2	2	2.73861	7	2	-1.41504	0	inf
Farp1	10	11	3	0	0	0	5.17687	8	0	-3.16993	0.0863356	1.06381
Slc1a4	9	8	12	2	2	0	4.80625	9.66667	1.33333	-2.19265	0.00800096	2.09686
Cyb5r3	1	1	1	2	1	0	0.632456	1	1	0	1	0
Cpd	1	0	0	15	18	4	8.06639	0.333333	12.3333	3.32193	0.105236	0.977835
Srsf1	2	1	0	0	0	0	0.83666	1	0	-1	0.225403	0.64704
Cd2ap	5	6	7	0	0	0	3.34664	6	0	-2.80735	0.00913261	2.03941
Sod2	0	0	0	13	17	3	7.55645	0	11	3.58496	0.118353	0.926822
Lrrc59	0	0	1	0	1	0	0.516398	0.333333	0.333333	0	1	0
Farsb	1	0	6	0	0	0	2.40139	2.33333	0	-1.73697	0.335589	0.474192
Fam3c	0	0	0	19	24	8	10.6536	0	17	4.16993	0.0693369	1.15904
Uba6	0	0	3	0	0	0	1.22474	1	0	-1	0.42265	0.374019
Ptpn23	5	4	1	0	0	0	2.25093	3.33333	0	-2.11548	0.109129	0.962059
Tardbp	1	2	1	0	0	0	0.816497	1.33333	0	-1.22239	0.057191	1.24267
Map2k1	1	0	1	0	0	0	0.516398	0.666667	0	-0.736966	0.183503	0.736356
Mvb12b	13	16	13	0	0	0	7.74597	14	0	-3.90689	0.00506332	2.29556
Hk2	0	0	1	0	0	0	0.408248	0.333333	0	-0.415037	0.42265	0.374019
Eif5b	1	0	0	0	0	0	0.408248	0.333333	0	-0.415037	0.42265	0.374019
Arpc4	2	3	3	0	1	0	1.3784	2.66667	0.333333	-1.45943	0.0077626	2.10999
Pdcd6	11	10	9	0	0	0	5.51362	10	0	-3.45943	0.00331676	2.47929
Bst1	7	9	6	6	6	0	3.01109	7.33333	4	-0.736966	0.232673	0.633254
Ilf2	2	5	0	0	0	0	2.04124	2.33333	0	-1.73697	0.249521	0.602893
Vps28	15	20	15	0	0	0	9.30949	16.6667	0	-4.14296	0.00985246	2.00646
Mvb12a	12	11	14	0	0	0	6.82398	12.3333	0	-3.73697	0.00507434	2.29462
Stoml2	0	0	0	9	14	1	6.03324	0	8	3.16993	0.168948	0.772247
Ak2	0	0	0	0	1	0	0.408248	0	0.333333	0.415037	0.42265	0.374019
Ttll12	0	0	2	0	0	0	0.816497	0.666667	0	-0.736966	0.42265	0.374019
Flii	0	0	1	0	0	0	0.408248	0.333333	0	-0.415037	0.42265	0.374019
Glo1	1	1	1	2	4	0	1.3784	1	2	0.584963	0.477767	0.320784
Coro1c	1	1	0	6	5	0	2.63944	0.666667	3.66667	1.48543	0.245148	0.610572
Rpl15	1	1	3	0	1	0	1.09545	1.66667	0.333333	-1	0.17342	0.7609
Rpl14	3	5	3	0	1	0	2	3.66667	0.333333	-1.80735	0.0217245	1.66305
Tm9sf3	1	1	0	14	15	7	6.80196	0.666667	12	2.96347	0.0438019	1.35851
Abcc1	4	4	3	0	0	0	2.04124	3.66667	0	-2.22239	0.0081634	2.08813
Ilf3	3	2	0	0	0	0	1.32916	1.66667	0	-1.41504	0.199359	0.700364
Rps19	1	0	0	0	1	0	0.516398	0.333333	0.333333	0	1	0
Cemip2	3	2	3	15	16	0	7.06399	2.66667	10.3333	1.62803	0.276385	0.558486
Psmd7	0	1	3	0	0	0	1.21106	1.33333	0	-1.22239	0.269703	0.569114
Sdcbp2	17	15	11	0	0	0	8.08497	14.3333	0	-3.9386	0.0148078	1.82951
Bzw1	0	1	0	0	0	0	0.408248	0.333333	0	-0.415037	0.42265	0.374019
Hnrnpd	3	3	0	0	2	0	1.50555	2	0.666667	-0.847997	0.337895	0.471219
Ctsb	1	0	1	9	11	0	4.96655	0.666667	6.66667	2.20163	0.217205	0.663131
Pfkp	0	2	0	0	0	0	0.816497	0.666667	0	-0.736966	0.42265	0.374019
Rtcb	0	0	1	0	0	0	0.408248	0.333333	0	-0.415037	0.42265	0.374019
Psmd5	0	1	0	0	0	0	0.408248	0.333333	0	-0.415037	0.42265	0.374019
Nectin2	7	8	4	10	9	1	3.39116	6.33333	6.66667	0.0641303	0.921657	0.0354305
Slc4a7	8	5	3	0	0	1	3.18852	5.33333	0.333333	-2.24793	0.0683885	1.16502
Eif6	1	2	1	2	3	0	1.04881	1.33333	1.66667	0.192645	0.750738	0.124512
Myo1e	3	2	2	0	0	0	1.32916	2.33333	0	-1.73697	0.0198039	1.70325
Rps12	1	0	1	0	2	0	0.816497	0.666667	0.666667	0	1	0
Uso1	1	1	1	0	0	0	0.547723	1	0	-1	0	inf
Fth1	0	1	4	5	6	2	2.36643	1.66667	4.33333	1	0.191744	0.717277
Lamb3	8	7	5	4	7	0	2.92689	6.66667	3.66667	-0.716207	0.276105	0.558926
Rpl13	0	1	1	0	1	0	0.547723	0.666667	0.333333	-0.321928	0.518519	0.285236
Psmb2	1	1	1	0	1	0	0.516398	1	0.333333	-0.584963	0.183503	0.736356
Cdc37	1	1	1	0	0	0	0.547723	1	0	-1	0	inf
Hs2st1	0	0	0	16	15	1	7.89092	0	10.6667	3.54432	0.158477	0.800033
Thop1	0	0	0	0	1	0	0.408248	0	0.333333	0.415037	0.42265	0.374019
Cnp	6	4	5	6	4	0	2.2286	5	3.33333	-0.469485	0.449312	0.347452
Tmem30a	1	1	0	14	18	1	7.9854	0.666667	11	2.848	0.181158	0.741942
Csnk2a1	3	2	6	1	0	0	2.28035	3.66667	0.333333	-1.80735	0.0999741	1.00011
Psma5	0	0	2	2	3	0	1.32916	0.666667	1.66667	0.678072	0.420396	0.376341
Lnpep	3	8	5	0	0	0	3.32666	5.33333	0	-2.66297	0.0668611	1.17483
