# Supplementary material for: A new class of extracellular vesicles, Motile Vesicles (“MoVes”), carry whole genome DNA and are emitted during active cancer cell migration
Source: Research Square preprint supplement (doi:10.21203/rs.3.rs-7054528/v1), 2025-07-21
Supplement: Supplementary file 2 [file a85725cbbc5a0ae3ed6c523d.docx]

**Extended Data Fig. 1: Induction of *HRAS* oncogene in MCF10AT cells results in increased cell migration and MoVes emission.** (**a,b**) Analysis of cells with different migration tracks and velocities by Migration and Chemotaxis tool. Migration of MCF10A and MCF10AT. 10 cells were tracked, and trajectory plots were plotted using Fiji plug in Migration and Chemotaxis tool. MCF10A show restricted movement, suggesting minimal motility. MCF10AT plots display progressively more extended tracks, indicating increased cell migration. (**c**) Velocity of cells (µm/min) are plotted for MCF10A *vs.* MCF10AT cells. Data points are from three independent experiments and plotted as mean ± sem**.** The P values displayed in the graphs were derived from a two-tailed Student’s t-test. The experiments were repeated independently with similar results.

**Extended Data Fig. 2: Cancer cell lines show higher percentage of MoVes compared to non-transformed cells.** SEM images showing MoVes emission in (**a**) 92.1, (**b**) MP41 and (**c**) CaSki cells. No MoVes were seen in (**e**) IHH, (**f**) IEC18 (normal) and (**g**) NCM (normal) primary cells and (**d**) RAS3 (cancer). (**h,i**) Colon cancer cell lines SW620 and HT29 have lower MoVes emission. (**j**) Graph showing the percentage of MoVes in cancer cells and normal cells (calculated using the SEM images). A minimum of 50 cells were imaged per experiments and repeated three times.

**Extended Data Fig. 3: Antibodies are highly specific and did not show non-specific labelling.**TEM immunogold labeling of (**a**) BrdU, (**b**) histones and (**c**) dsDNA in nuclei to assess antibody specificity. BrdU and histones (10nm gold), dsDNA (20nm gold) are observed in the nucleus.

**Extended Data Fig. 4:** **Characterization of sEVs, MVs and MoVes.** (**a- b**) Schematic protocol of isolation and enrichment of sEVs, MVs and MoVes. (**c**) Characterization of distinct EVs phenotype. TEM images of sEVs, MVs and MoVes (**d**) Western blot of cell lysate, sEVs, MVs and MoVes. (**e**) NTA of sEVs and MVs. (**f**) A representative Cryo-TEM image of MoVes . (**g**) Size of sEVs, MVs and MoVes measured using Spectradyne with 150, 2000 and 10k cartridges respectively.

**Extended Data Fig. 5: Distinct proteomic profile of MoVes.**

(**a-c**) Gene Set Enrichment Analysis (GSEA) identifies top gene sets enriched in MoVes. Proteins are ranked by GSEA based on differential expression levels. Enrichment scores (green line) indicate whether pre-specified pathways are significantly overrepresented at the top or bottom of the ranked gene list. Vertical black lines highlight positions of specific pathway members in the ranked gene list. Example pathways include oxidative phosphorylation, adipogenesis, and reactive oxygen species (ROS) pathways. (**d**) Gene ontology (GO) analysis of MoVes proteins using DAVID functional annotation. Top enriched biological processes (i), cellular components (ii), and KEGG pathways (iii) are reported. Percentages represent the proportion of genes encoding proteins associated with each GO biological process (GOBPs), cellular components (GOCCs), and KEGG pathways. (**e**) 4T1 MoVes stained positive for mitochondrial cytochrome c oxidase subunit IV (Cox IV) and double-stranded DNA (dsDNA). Scale bar = 10 µm. (**f**) Gene ontology analysis of proteins enriched in sEVs using DAVID functional annotation. Top enriched biological processes (i), cellular components (ii), molecular functions (iii), and KEGG pathways (iv) are shown.

**Extended Data Fig. 6: Immunofluorescence analysis of epithelial-to-mesenchymal transition (EMT) markers in 4T1, MDA-MB-231, MCF10A.** Micrographs using the confocal microscope showing the (**a**) mesenchymal markers N-cadherin and vimentin (red) and (**b**) epithelial marker E-cadherin in cells grown in 2Dmonolayers. Original magnification: 40×. Bar: 20 µm. Blue: DAPI. (**c-d**) SEM images of MDA-MB-231 and MCF10A. Confirmation of (**e**) mesenchymal (vimentin, laminin) and epithelial (E-cadherin, EpCAM) expression by Western blot in 4T1, MDAMB231 and MCF10A cells. Stain free gels were used as а loading control.

**Extended Data Fig. 7: Bolus dosage of MoVes results in leads to asphyxiation of mice and distinct biodistribution.**  IVIS imaging of biodistribution of (**a**) MoVes, (**c**) sEVs, (**e**) MVs labeled with CellVue Burgendy (**b,d, f**) free CellVue Burgendy dye in mice NSG model. Preferential accumulation sites are denoted by blue arrows. (**a**) Higher doses (>) of CellVue Burgendy-labelled MoVes at the lungs and (b) sEVs accumulated at the liver respectively 6 hours after intravenous (IV) injection. No accumulation was observed in any organs for mice injected with free dye.

**Extended Data Fig. 8: Schematic diagram of MoVes emission during EMT.**

Immunofluorescence analysis of fibronectins and integrin alpha v in 4T1.

Micrographs using the confocal microscope showing the (**a**) fibronectin and (**b**) integrin alpha v. Original magnification: 40×. Bar: 20 µm. Blue: DAPI, Green: WGA and Yellow: Fibronectin or Integrin alpha V. (**c**) During EMT, epithelial tumour cells loosen their cell–cell junction proteins (EpCAM, E-Cadherin) to become motile (step 1) and that they degrade extracellular matrix (ECM); breakdown of these physical barriers allows cells to migrate (step 2). During cancer cell migration, the leading edge (lamellipodium extends) attached to the new substrate, whereas the trailing edge forms a tension on the actin filament when cells move forward, leaving behind the Motile Vesicles (Step 3)
