# Supplementary material for: A new class of extracellular vesicles, Motile Vesicles (“MoVes”), carry whole genome DNA and are emitted during active cancer cell migration
Source: Research Square preprint supplement (doi:10.21203/rs.3.rs-7054528/v1), 2025-07-21
Supplement: Supplementary file 3 [file c144b43bc69567468204cbee.docx]

**Supplementary Video 1a**

MoVes forming from the retraction end of MCF-10AT cell in a field. The black arrow denotes MoVes biogenesis. WGA (Green) Scale: 20 μm. Video length, 25h.

**Supplementary Video 1b**

Mutiple MoVes forming from the retraction end of 4T1 cells. The black arrowheads denote MoVes biogenesis. Note the MoVes interacting with the neighbouring surrounding cells. WGA (Green) Scale: 20 μm. Video length, 15h.

**Supplementary Video 1c**

MoVes forming from the retraction end of 4T1 cells in a field. Note the MoVes interacting with the neighbouring surrounding cells. WGA (Green) Scale: 20 μm. Video length, 21h.

**Supplementary Video 1d**

1-2 MoVes forming from the retraction end from MDA-MB-231 cells in a field. Note the MoVes interacting with the neighbouring surrounding cells. WGA (Green) Scale: 20 μm. Video length, 22h.

**Supplementary Video 1e**

MoVes forming from the retraction end from MDA-MB-231 cells in a field. Note the MoVes interacting with the neighbouring surrounding cells. WGA (Green), Hoechst (Blue) Scale: 20 μm. Video length, 11h.

**Supplementary Video 2**

No MoVes emission from normal choroidal melanocytes. WGA (Green). Scale: 20 μm. Video length, 14h.

**Supplementary Video 3a**

4T1 cells treated with 150nM TGFβ receptor type I (TGFβR1) inhibitor (LY-364947). The treatment resulted in restricted movement and no MoVes biogenesis. WGA (Green). Scale: 20 μm. Video length, 15:30h.

**Supplementary Video 3b**

MDA-MB-231 cells treated with 150nM TGFβ receptor type I (TGFβR1) inhibitor (LY-364947). The treatment resulted in restricted movement and no MoVes biogenesis. WGA (Green), scale: 20 μm. Video length, 13h.

**Supplementary Video 4**

MCF10A cells treated with StemXVivo®EMT Inducing Media Supplement for 10 days at 1x concentration. The treatment resulted in increased migration speed and MoVes biogenesis. WGA (Green), scale: 20 μm. Video length, 18h.
