# Supplementary material for: A new class of extracellular vesicles, Motile Vesicles (“MoVes”), carry whole genome DNA and are emitted during active cancer cell migration
Source: Research Square preprint supplement (doi:10.21203/rs.3.rs-7054528/v1), 2025-07-21
Supplement: Supplementary file 4 [file c35224b025512bc55466017c.xlsx]

## Sheet: Supplementary table 2
Supplementary table 2: Spectral counts of identified proteins across experimental conditions exported from Scaffold.
#	Identified Proteins (1613/1676)	Accession Number	Alternate ID	Molecular Weight	Protein Grouping Ambiguity	ANOVA Test (p-value): (p < 0.05)	Quantitative Profile	1_4T1_cell_1	1_4T1_cell_2	1_4T1_cell_3	4T1_MoVes1	4T1_MoVes2	4T1_MoVes3	4T1_MV1	4T1_MV2	4T1_MV3	4T1_sEV_1	4T1_sEV_2	4T1_sEV_3
1	Fibronectin OS=Mus musculus OX=10090 GN=Fn1 PE=1 SV=4	P11276	Fn1	273 kDa		0.00012	1_4T1_cell low, 4T1_MV high, 4T1_sEV high	2	0	4	55	62	6	750	511	423	565	591	288
2	Basement membrane-specific heparan sulfate proteoglycan core protein OS=Mus musculus OX=10090 GN=Hspg2 PE=1 SV=1	Q05793	Hspg2	398 kDa		0.0031	1_4T1_cell low, 4T1_MV high, 4T1_sEV high	0	0	0	23	27	0	328	129	169	248	260	108
3	Heat shock cognate 71 kDa protein OS=Mus musculus OX=10090 GN=Hspa8 PE=1 SV=1	P63017	Hspa8	71 kDa	TRUE	0.15	[]	123	116	183	79	72	42	96	90	106	115	140	119
4	Actin, cytoplasmic 2 OS=Mus musculus OX=10090 GN=Actg1 PE=1 SV=1	P63260	Actg1	42 kDa	TRUE	0.011	1_4T1_cell low, 4T1_MV high, 4T1_sEV low	126	129	104	27	32	35	219	226	115	55	69	32
5	Integrin beta-1 OS=Mus musculus OX=10090 GN=Itgb1 PE=1 SV=1	P09055	Itgb1	88 kDa		< 0.00010	1_4T1_cell low, 4T1_MV high, 4T1_sEV high	26	30	34	161	200	44	67	75	81	97	104	102
6	Alpha-enolase OS=Mus musculus OX=10090 GN=Eno1 PE=1 SV=3	P17182	Eno1	47 kDa	TRUE	< 0.00010	1_4T1_cell high, 4T1_MV low, 4T1_sEV low	208	203	213	6	13	3	60	65	38	39	29	41
7	Moesin OS=Mus musculus OX=10090 GN=Msn PE=1 SV=3	P26041	Msn	68 kDa	TRUE	0.18	[]	82	87	104	8	13	22	92	116	101	55	70	81
8	Elongation factor 2 OS=Mus musculus OX=10090 GN=Eef2 PE=1 SV=2	P58252	Eef2	95 kDa	TRUE	0.022	1_4T1_cell high, 4T1_MV low, 4T1_sEV low	138	148	212	35	45	20	71	61	35	39	43	36
9	Heat shock protein HSP 90-beta OS=Mus musculus OX=10090 GN=Hsp90ab1 PE=1 SV=3	P11499	Hsp90ab1	83 kDa	TRUE	< 0.00010	1_4T1_cell high, 4T1_MV low, 4T1_sEV low	159	167	212	7	16	4	60	61	35	35	39	34
10	Programmed cell death 6-interacting protein OS=Mus musculus OX=10090 GN=Pdcd6ip PE=1 SV=3	Q9WU78	Pdcd6ip	96 kDa		0.00059	1_4T1_cell low, 4T1_MV low, 4T1_sEV high	43	50	47	1	1	0	58	64	84	147	177	164
11	Filamin-A OS=Mus musculus OX=10090 GN=Flna PE=1 SV=5	Q8BTM8	Flna	281 kDa	TRUE	0.022	1_4T1_cell high, 4T1_MV high, 4T1_sEV low	46	51	247	92	99	12	102	87	51	16	22	4
12	Integrin alpha-3 OS=Mus musculus OX=10090 GN=Itga3 PE=1 SV=1	Q62470	Itga3	117 kDa		< 0.00010	1_4T1_cell low, 4T1_MV high, 4T1_sEV high	21	23	30	130	148	44	45	54	72	82	91	90
13	Myosin-9 OS=Mus musculus OX=10090 GN=Myh9 PE=1 SV=4	Q8VDD5	Myh9	226 kDa	TRUE	0.0048	1_4T1_cell high, 4T1_MV high, 4T1_sEV low	157	165	163	13	16	3	89	100	20	28	27	32
14	Myoferlin OS=Mus musculus OX=10090 GN=Myof PE=1 SV=2	Q69ZN7	Myof	233 kDa		0.001	1_4T1_cell low, 4T1_MV high, 4T1_sEV low	62	64	91	88	89	17	74	77	50	35	44	49
15	Clathrin heavy chain 1 OS=Mus musculus OX=10090 GN=Cltc PE=1 SV=3	Q68FD5	Cltc	192 kDa		0.0029	1_4T1_cell low, 4T1_MV high, 4T1_sEV high	70	82	100	6	12	0	82	97	73	78	102	41
16	Heat shock protein HSP 90-alpha OS=Mus musculus OX=10090 GN=Hsp90aa1 PE=1 SV=4	P07901	Hsp90aa1	85 kDa	TRUE	< 0.00010	1_4T1_cell high, 4T1_MV low, 4T1_sEV low	148	153	186	5	11	3	50	49	26	27	27	23
17	Pyruvate kinase PKM OS=Mus musculus OX=10090 GN=Pkm PE=1 SV=4	P52480	Pkm	58 kDa		0.011	1_4T1_cell high, 4T1_MV high, 4T1_sEV low	129	130	136	6	17	5	62	64	40	37	39	60
18	Annexin A1 OS=Mus musculus OX=10090 GN=Anxa1 PE=1 SV=2	P10107	Anxa1	39 kDa		0.0017	1_4T1_cell low, 4T1_MV high, 4T1_sEV low	99	109	84	4	6	5	81	77	59	40	46	41
19	Cytoplasmic dynein 1 heavy chain 1 OS=Mus musculus OX=10090 GN=Dync1h1 PE=1 SV=2	Q9JHU4	Dync1h1	532 kDa		0.12	[]	145	143	130	0	0	0	39	49	0	23	21	104
20	Fatty acid synthase OS=Mus musculus OX=10090 GN=Fasn PE=1 SV=2	P19096	Fasn	272 kDa		0.039	1_4T1_cell high, 4T1_MV low, 4T1_sEV high	124	134	157	5	4	2	41	48	5	29	29	76
21	Tubulin alpha-1B chain OS=Mus musculus OX=10090 GN=Tuba1b PE=1 SV=2	P05213	Tuba1b	50 kDa	TRUE	0.0048	1_4T1_cell high, 4T1_MV low, 4T1_sEV low	121	124	137	12	20	2	46	52	11	36	37	38
22	Alpha-actinin-1 OS=Mus musculus OX=10090 GN=Actn1 PE=1 SV=1	Q7TPR4	Actn1	103 kDa	TRUE	< 0.00010	1_4T1_cell low, 4T1_MV high, 4T1_sEV low	51	55	69	85	86	18	95	108	54	14	14	3
23	Tubulin beta-5 chain OS=Mus musculus OX=10090 GN=Tubb5 PE=1 SV=1	P99024	Tubb5	50 kDa	TRUE	0.043	1_4T1_cell high, 4T1_MV low, 4T1_sEV low	136	144	129	9	26	0	53	56	4	26	34	34
24	Plectin OS=Mus musculus OX=10090 GN=Plec PE=1 SV=3	Q9QXS1	Plec	534 kDa	TRUE	< 0.00010	1_4T1_cell high, 4T1_MV low, 4T1_sEV low	126	141	206	1	1	0	51	55	10	0	2	0
25	Endoplasmic reticulum chaperone BiP OS=Mus musculus OX=10090 GN=Hspa5 PE=1 SV=3	P20029	Hspa5	72 kDa	TRUE	0.00011	1_4T1_cell high, 4T1_MV low, 4T1_sEV low	97	104	134	60	65	27	36	45	19	16	15	20
26	Histone H4 OS=Mus musculus OX=10090 GN=H4c1 PE=1 SV=2	P62806	H4c1	11 kDa		0.0058	1_4T1_cell low, 4T1_MV low, 4T1_sEV high	5	5	42	12	8	3	45	59	25	109	117	198
27	Elongation factor 1-alpha 1 OS=Mus musculus OX=10090 GN=Eef1a1 PE=1 SV=3	P10126	Eef1a1	50 kDa	TRUE	0.0024	1_4T1_cell high, 4T1_MV high, 4T1_sEV low	91	101	129	12	16	5	46	43	34	29	34	25
28	Glyceraldehyde-3-phosphate dehydrogenase OS=Mus musculus OX=10090 GN=Gapdh PE=1 SV=2	P16858	Gapdh	36 kDa	TRUE	< 0.00010	1_4T1_cell high, 4T1_MV high, 4T1_sEV low	110	117	115	5	7	1	54	53	25	35	35	28
29	Talin-1 OS=Mus musculus OX=10090 GN=Tln1 PE=1 SV=2	P26039	Tln1	270 kDa	TRUE	< 0.00010	1_4T1_cell high, 4T1_MV low, 4T1_sEV low	99	101	150	3	3	2	53	52	21	37	42	31
30	Ras GTPase-activating-like protein IQGAP1 OS=Mus musculus OX=10090 GN=Iqgap1 PE=1 SV=2	Q9JKF1	Iqgap1	189 kDa	TRUE	0.0082	1_4T1_cell low, 4T1_MV high, 4T1_sEV low	68	77	62	36	48	4	82	100	39	19	24	10
31	Prostaglandin F2 receptor negative regulator OS=Mus musculus OX=10090 GN=Ptgfrn PE=1 SV=2	Q9WV91	Ptgfrn	99 kDa		< 0.00010	1_4T1_cell low, 4T1_MV low, 4T1_sEV high	2	1	2	11	9	2	37	33	53	142	154	137
32	Ubiquitin-40S ribosomal protein S27a OS=Mus musculus OX=10090 GN=Rps27a PE=1 SV=2	P62983	Rps27a	18 kDa		0.057	[]	22	25	52	36	42	10	30	35	57	63	76	83
33	Histone H2B type 1-F/J/L OS=Mus musculus OX=10090 GN=H2bc7 PE=1 SV=2	P10853	H2bc7	14 kDa	TRUE	0.00021	1_4T1_cell low, 4T1_MV low, 4T1_sEV high	4	4	49	4	3	1	35	55	12	123	127	160
34	Integrin alpha-2 OS=Mus musculus OX=10090 GN=Itga2 PE=1 SV=2	Q62469	Itga2	129 kDa		0.00078	1_4T1_cell low, 4T1_MV high, 4T1_sEV high	7	4	14	76	78	20	48	56	64	54	61	48
35	Tubulin beta-4B chain OS=Mus musculus OX=10090 GN=Tubb4b PE=1 SV=1	P68372	Tubb4b	50 kDa	TRUE	0.012	1_4T1_cell high, 4T1_MV low, 4T1_sEV low	124	133	114	6	18	0	43	45	4	22	28	28
36	Annexin A2 OS=Mus musculus OX=10090 GN=Anxa2 PE=1 SV=2	P07356	Anxa2	39 kDa		0.0034	1_4T1_cell low, 4T1_MV high, 4T1_sEV low	71	63	70	6	11	7	76	68	54	31	36	28
37	Alpha-actinin-4 OS=Mus musculus OX=10090 GN=Actn4 PE=1 SV=1	P57780	Actn4	105 kDa	TRUE	< 0.00010	1_4T1_cell low, 4T1_MV high, 4T1_sEV low	34	37	49	67	77	21	71	92	58	8	9	3
38	60 kDa heat shock protein, mitochondrial OS=Mus musculus OX=10090 GN=Hspd1 PE=1 SV=1	P63038	Hspd1	61 kDa		< 0.00010	1_4T1_cell high, 4T1_MV low, 4T1_sEV low	146	156	157	1	9	4	25	27	5	3	1	0
39	Sodium/potassium-transporting ATPase subunit alpha-1 OS=Mus musculus OX=10090 GN=Atp1a1 PE=1 SV=1	Q8VDN2	Atp1a1	113 kDa		0.048	1_4T1_cell low, 4T1_MV high, 4T1_sEV low	28	29	35	16	16	10	75	70	87	34	38	54
40	Annexin A5 OS=Mus musculus OX=10090 GN=Anxa5 PE=1 SV=1	P48036	Anxa5	36 kDa		0.01	1_4T1_cell low, 4T1_MV high, 4T1_sEV low	64	60	55	26	39	8	49	55	35	24	32	32
41	Fructose-bisphosphate aldolase A OS=Mus musculus OX=10090 GN=Aldoa PE=1 SV=2	P05064	Aldoa	39 kDa	TRUE	0.00034	1_4T1_cell high, 4T1_MV high, 4T1_sEV low	100	100	91	23	33	8	27	34	22	11	11	13
42	Catenin alpha-1 OS=Mus musculus OX=10090 GN=Ctnna1 PE=1 SV=1	P26231	Ctnna1	100 kDa	TRUE	0.00034	1_4T1_cell low, 4T1_MV high, 4T1_sEV high	35	40	29	17	18	5	53	56	37	49	56	54
43	EH domain-containing protein 1 OS=Mus musculus OX=10090 GN=Ehd1 PE=1 SV=1	Q9WVK4	Ehd1	61 kDa	TRUE	0.00019	1_4T1_cell low, 4T1_MV high, 4T1_sEV high	23	23	25	0	0	0	55	61	54	71	83	64
44	Lactadherin OS=Mus musculus OX=10090 GN=Mfge8 PE=1 SV=3	P21956	Mfge8	51 kDa		0.0048	1_4T1_cell low, 4T1_MV high, 4T1_sEV high	2	2	0	24	35	1	67	67	58	75	67	48
45	Plexin-B2 OS=Mus musculus OX=10090 GN=Plxnb2 PE=1 SV=1	B2RXS4	Plxnb2	206 kDa	TRUE	0.0034	1_4T1_cell low, 4T1_MV high, 4T1_sEV high	11	8	12	82	102	11	37	36	25	34	40	26
46	Filamin-B OS=Mus musculus OX=10090 GN=Flnb PE=1 SV=3	Q80X90	Flnb	278 kDa	TRUE	0.048	1_4T1_cell high, 4T1_MV high, 4T1_sEV low	21	19	122	57	61	4	63	48	21	4	5	0
47	14-3-3 protein zeta/delta OS=Mus musculus OX=10090 GN=Ywhaz PE=1 SV=1	P63101	Ywhaz	28 kDa	TRUE	0.14	[]	71	74	74	12	17	9	47	48	31	29	27	24
48	Ezrin OS=Mus musculus OX=10090 GN=Ezr PE=1 SV=3	P26040	Ezr	69 kDa	TRUE	0.3	[]	39	42	52	7	9	11	43	46	45	23	29	39
49	Radixin OS=Mus musculus OX=10090 GN=Rdx PE=1 SV=3	P26043	Rdx	69 kDa	TRUE	0.36	[]	42	52	56	5	0	11	38	47	45	20	25	30
50	Keratin, type II cytoskeletal 1 OS=Homo sapiens OX=9606 GN=KRT1 PE=1 SV=6	P04264	KRT1	66 kDa	TRUE	0.095	[]	22	0	0	94	105	0	61	75	0	0	0	0
51	Integrin alpha-V OS=Mus musculus OX=10090 GN=Itgav PE=1 SV=2	P43406	Itgav	115 kDa		0.022	1_4T1_cell low, 4T1_MV high, 4T1_sEV high	6	8	5	51	65	5	35	34	33	57	53	57
52	Phosphoglycerate kinase 1 OS=Mus musculus OX=10090 GN=Pgk1 PE=1 SV=4	P09411	Pgk1	45 kDa	TRUE	0.015	1_4T1_cell high, 4T1_MV high, 4T1_sEV low	88	87	83	3	7	5	35	30	27	16	18	19
53	Transitional endoplasmic reticulum ATPase OS=Mus musculus OX=10090 GN=Vcp PE=1 SV=4	Q01853	Vcp	89 kDa		0.0096	1_4T1_cell high, 4T1_MV low, 4T1_sEV low	83	89	76	0	9	0	38	29	13	17	22	36
54	Annexin A6 OS=Mus musculus OX=10090 GN=Anxa6 PE=1 SV=3	P14824	Anxa6	76 kDa		0.0057	1_4T1_cell low, 4T1_MV high, 4T1_sEV high	41	41	50	9	7	5	49	49	39	34	44	37
55	4F2 cell-surface antigen heavy chain OS=Mus musculus OX=10090 GN=Slc3a2 PE=1 SV=1	P10852	Slc3a2	58 kDa		0.0033	1_4T1_cell low, 4T1_MV high, 4T1_sEV high	13	14	14	49	54	25	30	31	44	28	33	33
56	Keratin, type I cytoskeletal 10 OS=Homo sapiens OX=9606 GN=KRT10 PE=1 SV=6	P13645	KRT10	59 kDa	TRUE	0.19	[]	18	24	0	68	83	0	51	55	0	31	44	0
57	14-3-3 protein epsilon OS=Mus musculus OX=10090 GN=Ywhae PE=1 SV=1	P62259	Ywhae	29 kDa	TRUE	0.1	[]	62	64	50	11	15	9	44	45	32	21	22	18
58	Syntenin-1 OS=Mus musculus OX=10090 GN=Sdcbp PE=1 SV=1	O08992	Sdcbp	32 kDa		< 0.00010	1_4T1_cell low, 4T1_MV low, 4T1_sEV high	0	0	1	5	13	2	31	31	27	85	100	86
59	Myosin-10 OS=Mus musculus OX=10090 GN=Myh10 PE=1 SV=2	Q61879	Myh10	229 kDa	TRUE	0.18	[]	67	73	50	15	15	0	56	57	8	14	14	15
60	Malate dehydrogenase, mitochondrial OS=Mus musculus OX=10090 GN=Mdh2 PE=1 SV=3	P08249	Mdh2	36 kDa		< 0.00010	1_4T1_cell high, 4T1_MV low, 4T1_sEV low	47	47	44	76	79	36	16	19	1	3	0	5
61	Histone H2A type 2-C OS=Mus musculus OX=10090 GN=H2ac20 PE=1 SV=3	Q64523 (+1)	H2ac20	14 kDa	TRUE	0.0042	1_4T1_cell low, 4T1_MV low, 4T1_sEV high	6	7	22	7	5	1	15	26	12	42	45	69
62	Annexin A3 OS=Mus musculus OX=10090 GN=Anxa3 PE=1 SV=4	O35639	Anxa3	36 kDa		0.0047	1_4T1_cell low, 4T1_MV high, 4T1_sEV low	41	43	47	29	27	13	35	35	17	25	21	27
63	Vinculin OS=Mus musculus OX=10090 GN=Vcl PE=1 SV=4	Q64727	Vcl	117 kDa		< 0.00010	1_4T1_cell low, 4T1_MV high, 4T1_sEV low	46	47	49	22	27	8	40	43	26	18	23	17
64	Trypsin OS=Sus scrofa OX=9823 PE=1 SV=1	P00761		24 kDa	FALSE	0.057	[]	4	4	0	153	199	0	7	8	0	8	6	0
65	Keratin, type I cytoskeletal 9 OS=Homo sapiens OX=9606 GN=KRT9 PE=1 SV=3	P35527	KRT9	62 kDa	TRUE	0.19	[]	20	25	0	61	66	0	41	56	0	20	31	0
66	Thrombospondin-1 OS=Mus musculus OX=10090 GN=Thbs1 PE=1 SV=1	P35441	Thbs1	130 kDa	TRUE	< 0.00010	1_4T1_cell low, 4T1_MV low, 4T1_sEV high	3	2	3	6	6	1	22	19	12	107	75	77
67	Valine--tRNA ligase OS=Mus musculus OX=10090 GN=Vars1 PE=1 SV=1	Q9Z1Q9	Vars1	140 kDa		0.078	[]	70	64	76	0	0	0	15	13	4	10	13	52
68	Peptidyl-prolyl cis-trans isomerase A OS=Mus musculus OX=10090 GN=Ppia PE=1 SV=2	P17742	Ppia	18 kDa		0.6	[]	51	55	48	10	14	7	28	31	12	23	21	14
69	Laminin subunit alpha-5 OS=Mus musculus OX=10090 GN=Lama5 PE=1 SV=4	Q61001	Lama5	404 kDa		0.0058	1_4T1_cell low, 4T1_MV low, 4T1_sEV high	0	1	0	22	31	1	5	6	0	68	69	115
70	14-3-3 protein theta OS=Mus musculus OX=10090 GN=Ywhaq PE=1 SV=1	P68254	Ywhaq	28 kDa	TRUE	0.031	1_4T1_cell low, 4T1_MV high, 4T1_sEV low	58	56	49	7	10	5	37	35	22	23	22	17
71	T-complex protein 1 subunit beta OS=Mus musculus OX=10090 GN=Cct2 PE=1 SV=4	P80314	Cct2	57 kDa		0.0019	1_4T1_cell high, 4T1_MV low, 4T1_sEV high	58	63	77	0	2	1	21	24	5	25	19	31
72	Beta-enolase OS=Mus musculus OX=10090 GN=Eno3 PE=1 SV=3	P21550	Eno3	47 kDa	TRUE	< 0.00010	1_4T1_cell high, 4T1_MV low, 4T1_sEV low	77	87	95	0	0	0	0	15	7	9	0	10
73	Filamin-C OS=Mus musculus OX=10090 GN=Flnc PE=1 SV=3	Q8VHX6	Flnc	291 kDa	TRUE	0.041	1_4T1_cell high, 4T1_MV high, 4T1_sEV low	24	24	81	39	44	3	32	36	8	0	5	0
74	Ubiquitin-like modifier-activating enzyme 1 OS=Mus musculus OX=10090 GN=Uba1 PE=1 SV=1	Q02053	Uba1	118 kDa		0.0016	1_4T1_cell high, 4T1_MV low, 4T1_sEV low	60	74	76	1	3	1	21	18	4	13	16	25
75	L-lactate dehydrogenase A chain OS=Mus musculus OX=10090 GN=Ldha PE=1 SV=3	P06151	Ldha	36 kDa	TRUE	< 0.00010	1_4T1_cell high, 4T1_MV high, 4T1_sEV low	59	60	59	2	3	0	25	26	17	19	21	12
76	Integrin beta-4 OS=Mus musculus OX=10090 GN=Itgb4 PE=1 SV=1	A2A863	Itgb4	202 kDa		0.015	1_4T1_cell low, 4T1_MV high, 4T1_sEV high	11	12	16	34	37	5	29	28	29	30	36	24
77	Spectrin alpha chain, non-erythrocytic 1 OS=Mus musculus OX=10090 GN=Sptan1 PE=1 SV=4	P16546	Sptan1	285 kDa	TRUE	0.13	[]	39	44	71	29	28	0	40	44	8	0	0	0
78	Catenin delta-1 OS=Mus musculus OX=10090 GN=Ctnnd1 PE=1 SV=2	P30999	Ctnnd1	105 kDa		< 0.00010	1_4T1_cell low, 4T1_MV low, 4T1_sEV high	25	25	20	0	1	0	32	31	12	36	42	39
79	Stress-70 protein, mitochondrial OS=Mus musculus OX=10090 GN=Hspa9 PE=1 SV=3	P38647	Hspa9	73 kDa	TRUE	0.0042	1_4T1_cell high, 4T1_MV low, 4T1_sEV low	57	61	76	24	23	15	9	14	0	0	0	1
80	eIF-2-alpha kinase activator GCN1 OS=Mus musculus OX=10090 GN=Gcn1 PE=1 SV=1	E9PVA8	Gcn1	293 kDa		< 0.00010	1_4T1_cell high, 4T1_MV low, 4T1_sEV low	61	65	77	0	0	0	1	2	0	1	2	2
81	Endoplasmin OS=Mus musculus OX=10090 GN=Hsp90b1 PE=1 SV=2	P08113	Hsp90b1	92 kDa	TRUE	0.044	1_4T1_cell high, 4T1_MV low, 4T1_sEV low	60	63	65	0	8	5	16	25	7	11	10	7
82	Catenin beta-1 OS=Mus musculus OX=10090 GN=Ctnnb1 PE=1 SV=1	Q02248	Ctnnb1	85 kDa	TRUE	0.0078	1_4T1_cell low, 4T1_MV high, 4T1_sEV high	20	22	15	1	1	4	37	31	29	28	36	28
83	Unconventional myosin-Ic OS=Mus musculus OX=10090 GN=Myo1c PE=1 SV=2	Q9WTI7	Myo1c	122 kDa		< 0.00010	1_4T1_cell low, 4T1_MV high, 4T1_sEV high	4	5	20	4	3	0	56	51	18	32	37	21
84	Polyadenylate-binding protein 1 OS=Mus musculus OX=10090 GN=Pabpc1 PE=1 SV=2	P29341	Pabpc1	71 kDa		0.0058	1_4T1_cell low, 4T1_MV high, 4T1_sEV low	28	32	39	0	0	0	32	36	36	28	36	19
85	Cation-independent mannose-6-phosphate receptor OS=Mus musculus OX=10090 GN=Igf2r PE=1 SV=1	Q07113	Igf2r	274 kDa		0.00077	1_4T1_cell high, 4T1_MV low, 4T1_sEV high	14	17	13	79	90	11	2	2	0	6	8	1
86	T-complex protein 1 subunit delta OS=Mus musculus OX=10090 GN=Cct4 PE=1 SV=3	P80315	Cct4	58 kDa		0.00068	1_4T1_cell high, 4T1_MV low, 4T1_sEV high	45	49	60	0	2	0	19	19	6	19	18	26
87	Guanine nucleotide-binding protein G(i) subunit alpha-2 OS=Mus musculus OX=10090 GN=Gnai2 PE=1 SV=5	P08752	Gnai2	40 kDa	TRUE	< 0.00010	1_4T1_cell low, 4T1_MV high, 4T1_sEV high	15	18	20	3	6	2	49	40	24	32	39	27
88	Bifunctional purine biosynthesis protein ATIC OS=Mus musculus OX=10090 GN=Atic PE=1 SV=2	Q9CWJ9	Atic	64 kDa		0.00078	1_4T1_cell high, 4T1_MV low, 4T1_sEV low	44	46	60	3	3	1	23	22	5	14	14	11
89	14-3-3 protein gamma OS=Mus musculus OX=10090 GN=Ywhag PE=1 SV=2	P61982	Ywhag	28 kDa	TRUE	0.44	[]	41	37	42	7	9	9	28	29	23	16	16	12
90	14-3-3 protein beta/alpha OS=Mus musculus OX=10090 GN=Ywhab PE=1 SV=3	Q9CQV8	Ywhab	28 kDa	TRUE	0.041	1_4T1_cell high, 4T1_MV high, 4T1_sEV low	51	46	40	0	0	4	29	28	19	16	15	11
91	14-3-3 protein eta OS=Mus musculus OX=10090 GN=Ywhah PE=1 SV=2	P68510	Ywhah	28 kDa	TRUE	0.22	[]	45	43	37	0	0	6	32	28	20	16	15	11
92	Keratin, type I cytoskeletal 18 OS=Mus musculus OX=10090 GN=Krt18 PE=1 SV=5	P05784	Krt18	48 kDa	TRUE	0.041	1_4T1_cell high, 4T1_MV low, 4T1_sEV low	68	70	29	8	9	6	16	15	7	5	3	0
93	Prelamin-A/C OS=Mus musculus OX=10090 GN=Lmna PE=1 SV=2	P48678	Lmna	74 kDa	TRUE	0.0021	1_4T1_cell high, 4T1_MV low, 4T1_sEV low	53	59	99	4	13	0	10	11	5	6	7	2
94	Aspartate aminotransferase, mitochondrial OS=Mus musculus OX=10090 GN=Got2 PE=1 SV=1	P05202	Got2	47 kDa		0.023	1_4T1_cell high, 4T1_MV low, 4T1_sEV low	30	31	32	49	44	42	8	6	1	0	0	0
95	Galectin-1 OS=Mus musculus OX=10090 GN=Lgals1 PE=1 SV=3	P16045	Lgals1	15 kDa		0.16	[]	38	48	66	11	12	9	17	18	14	12	10	8
96	T-complex protein 1 subunit zeta OS=Mus musculus OX=10090 GN=Cct6a PE=1 SV=3	P80317	Cct6a	58 kDa		0.00068	1_4T1_cell high, 4T1_MV low, 4T1_sEV low	50	54	57	0	0	0	16	17	4	9	12	19
97	Transketolase OS=Mus musculus OX=10090 GN=Tkt PE=1 SV=1	P40142	Tkt	68 kDa		< 0.00010	1_4T1_cell high, 4T1_MV low, 4T1_sEV low	64	61	61	4	3	2	10	13	6	5	6	9
98	Tubulin beta-6 chain OS=Mus musculus OX=10090 GN=Tubb6 PE=1 SV=1	Q922F4	Tubb6	50 kDa	TRUE	0.0026	1_4T1_cell high, 4T1_MV low, 4T1_sEV low	55	60	49	0	0	0	19	17	0	10	11	13
99	Serine protease HTRA1 OS=Mus musculus OX=10090 GN=Htra1 PE=1 SV=2	Q9R118	Htra1	51 kDa		< 0.00010	1_4T1_cell low, 4T1_MV low, 4T1_sEV high	0	0	0	1	1	1	26	26	10	60	68	52
100	Nucleolin OS=Mus musculus OX=10090 GN=Ncl PE=1 SV=2	P09405	Ncl	77 kDa		< 0.00010	1_4T1_cell high, 4T1_MV low, 4T1_sEV low	52	56	91	0	3	0	10	6	2	13	13	5
101	EH domain-containing protein 4 OS=Mus musculus OX=10090 GN=Ehd4 PE=1 SV=1	Q9EQP2	Ehd4	61 kDa	TRUE	< 0.00010	1_4T1_cell low, 4T1_MV high, 4T1_sEV high	11	12	10	0	1	0	25	32	22	43	43	41
102	Protein disulfide-isomerase A3 OS=Mus musculus OX=10090 GN=Pdia3 PE=1 SV=2	P27773	Pdia3	57 kDa		0.031	1_4T1_cell high, 4T1_MV low, 4T1_sEV low	50	51	58	16	20	15	11	15	4	2	3	1
103	CAD protein OS=Mus musculus OX=10090 GN=Cad PE=1 SV=1	B2RQC6	Cad	243 kDa	TRUE	0.013	1_4T1_cell high, 4T1_MV low, 4T1_sEV high	47	48	61	0	0	0	7	11	0	15	15	35
104	T-complex protein 1 subunit gamma OS=Mus musculus OX=10090 GN=Cct3 PE=1 SV=1	P80318	Cct3	61 kDa		0.019	1_4T1_cell high, 4T1_MV low, 4T1_sEV low	43	46	54	0	2	0	15	18	3	9	11	25
105	Glycerol-3-phosphate dehydrogenase, mitochondrial OS=Mus musculus OX=10090 GN=Gpd2 PE=1 SV=2	Q64521	Gpd2	81 kDa		< 0.00010	1_4T1_cell high, 4T1_MV low, 4T1_sEV low	24	23	26	60	65	25	1	1	6	0	0	0
106	Triosephosphate isomerase OS=Mus musculus OX=10090 GN=Tpi1 PE=1 SV=5	P17751	Tpi1	27 kDa		0.004	1_4T1_cell high, 4T1_MV low, 4T1_sEV low	45	47	54	7	11	4	11	13	11	7	5	8
107	Laminin subunit beta-1 OS=Mus musculus OX=10090 GN=Lamb1 PE=1 SV=3	P02469	Lamb1	197 kDa		0.029	1_4T1_cell low, 4T1_MV low, 4T1_sEV high	7	12	16	18	24	0	7	7	0	38	38	70
108	Albumin OS=Mus musculus OX=10090 GN=Alb PE=1 SV=3	P07724	Alb	69 kDa	TRUE	0.46	[]	0	0	0	0	0	109	0	0	0	20	17	0
109	Integrin alpha-6 OS=Mus musculus OX=10090 GN=Itga6 PE=1 SV=3	Q61739	Itga6	122 kDa		0.025	1_4T1_cell low, 4T1_MV high, 4T1_sEV high	6	6	5	16	19	4	25	29	34	29	29	24
110	Plastin-3 OS=Mus musculus OX=10090 GN=Pls3 PE=1 SV=3	Q99K51	Pls3	71 kDa	TRUE	0.00037	1_4T1_cell low, 4T1_MV high, 4T1_sEV low	30	30	29	28	24	6	27	35	22	5	4	3
111	Heat shock 70 kDa protein 1B OS=Mus musculus OX=10090 GN=Hspa1b PE=1 SV=3	P17879	Hspa1b	70 kDa	TRUE	0.0038	1_4T1_cell low, 4T1_MV low, 4T1_sEV high	27	27	21	6	6	0	16	17	11	23	25	25
112	T-complex protein 1 subunit theta OS=Mus musculus OX=10090 GN=Cct8 PE=1 SV=3	P42932	Cct8	60 kDa		0.00089	1_4T1_cell high, 4T1_MV low, 4T1_sEV low	52	49	70	0	0	0	12	14	4	11	11	22
113	Profilin-1 OS=Mus musculus OX=10090 GN=Pfn1 PE=1 SV=2	P62962	Pfn1	15 kDa	TRUE	0.0084	1_4T1_cell high, 4T1_MV high, 4T1_sEV low	36	42	56	17	19	3	18	20	9	11	11	8
114	Eukaryotic initiation factor 4A-I OS=Mus musculus OX=10090 GN=Eif4a1 PE=1 SV=1	P60843	Eif4a1	46 kDa	TRUE	< 0.00010	1_4T1_cell high, 4T1_MV low, 4T1_sEV low	42	44	58	2	5	0	13	16	5	11	11	10
115	Cofilin-1 OS=Mus musculus OX=10090 GN=Cfl1 PE=1 SV=3	P18760	Cfl1	19 kDa	TRUE	0.00032	1_4T1_cell low, 4T1_MV high, 4T1_sEV low	29	28	44	3	3	0	35	33	26	14	15	11
116	Keratin, type II cytoskeletal 7 OS=Mus musculus OX=10090 GN=Krt7 PE=1 SV=1	Q9DCV7	Krt7	51 kDa	TRUE	0.014	1_4T1_cell high, 4T1_MV high, 4T1_sEV low	47	53	29	9	10	2	17	23	16	3	7	2
117	Keratin, type II cytoskeletal 8 OS=Mus musculus OX=10090 GN=Krt8 PE=1 SV=4	P11679	Krt8	55 kDa	TRUE	0.008	1_4T1_cell high, 4T1_MV high, 4T1_sEV low	48	49	28	10	14	3	18	20	12	4	4	6
118	Cell division control protein 42 homolog OS=Mus musculus OX=10090 GN=Cdc42 PE=1 SV=2	P60766	Cdc42	21 kDa	TRUE	0.13	[]	22	21	29	3	12	5	25	27	27	22	27	27
119	ATP synthase subunit beta, mitochondrial OS=Mus musculus OX=10090 GN=Atp5f1b PE=1 SV=2	P56480	Atp5f1b	56 kDa		0.00016	1_4T1_cell high, 4T1_MV low, 4T1_sEV low	76	72	60	1	5	0	9	11	0	1	0	1
120	D-3-phosphoglycerate dehydrogenase OS=Mus musculus OX=10090 GN=Phgdh PE=1 SV=3	Q61753	Phgdh	57 kDa		< 0.00010	1_4T1_cell high, 4T1_MV low, 4T1_sEV low	49	46	61	1	1	0	20	19	8	12	11	17
121	Importin subunit beta-1 OS=Mus musculus OX=10090 GN=Kpnb1 PE=1 SV=2	P70168	Kpnb1	97 kDa		< 0.00010	1_4T1_cell high, 4T1_MV high, 4T1_sEV low	42	44	67	1	0	0	24	21	10	5	9	6
122	T-complex protein 1 subunit alpha OS=Mus musculus OX=10090 GN=Tcp1 PE=1 SV=3	P11983	Tcp1	60 kDa		0.0026	1_4T1_cell high, 4T1_MV low, 4T1_sEV high	44	48	54	0	0	0	17	13	3	15	14	25
123	Importin-5 OS=Mus musculus OX=10090 GN=Ipo5 PE=1 SV=3	Q8BKC5	Ipo5	124 kDa	TRUE	0.00012	1_4T1_cell high, 4T1_MV low, 4T1_sEV low	56	59	62	0	0	0	16	13	0	7	6	2
124	Retrovirus-related Env polyprotein from Fv-4 locus OS=Mus musculus OX=10090 GN=Fv4 PE=1 SV=2	P11370	Fv4	74 kDa	TRUE	0.051	[]	4	4	6	20	20	8	23	29	41	24	28	18
125	WD repeat-containing protein 1 OS=Mus musculus OX=10090 GN=Wdr1 PE=1 SV=3	O88342	Wdr1	66 kDa		0.1	[]	22	20	34	23	26	1	27	26	17	7	11	5
126	Histone H1.3 OS=Mus musculus OX=10090 GN=H1-3 PE=1 SV=2	P43277	H1-3	22 kDa	TRUE	0.096	[]	17	21	37	5	5	0	7	15	5	21	30	71
127	T-complex protein 1 subunit eta OS=Mus musculus OX=10090 GN=Cct7 PE=1 SV=1	P80313	Cct7	60 kDa		< 0.00010	1_4T1_cell high, 4T1_MV low, 4T1_sEV low	40	41	48	0	0	0	15	13	6	10	7	11
128	Heat shock 70 kDa protein 4 OS=Mus musculus OX=10090 GN=Hspa4 PE=1 SV=1	Q61316	Hspa4	94 kDa	TRUE	< 0.00010	1_4T1_cell high, 4T1_MV low, 4T1_sEV low	42	45	55	0	1	0	15	16	6	7	7	11
129	Basigin OS=Mus musculus OX=10090 GN=Bsg PE=1 SV=2	P18572	Bsg	42 kDa		0.00021	1_4T1_cell low, 4T1_MV high, 4T1_sEV high	8	7	6	39	44	16	16	14	25	13	12	19
130	Peroxiredoxin-1 OS=Mus musculus OX=10090 GN=Prdx1 PE=1 SV=1	P35700	Prdx1	22 kDa	TRUE	0.032	1_4T1_cell high, 4T1_MV high, 4T1_sEV low	27	27	34	12	20	11	18	16	9	8	8	6
131	Rab GDP dissociation inhibitor beta OS=Mus musculus OX=10090 GN=Gdi2 PE=1 SV=1	Q61598	Gdi2	51 kDa	TRUE	< 0.00010	1_4T1_cell high, 4T1_MV high, 4T1_sEV low	40	38	40	1	2	0	25	21	10	8	14	6
132	T-complex protein 1 subunit epsilon OS=Mus musculus OX=10090 GN=Cct5 PE=1 SV=1	P80316	Cct5	60 kDa		0.0068	1_4T1_cell high, 4T1_MV low, 4T1_sEV low	44	46	44	0	0	0	14	16	2	10	9	20
133	Elongation factor 1-gamma OS=Mus musculus OX=10090 GN=Eef1g PE=1 SV=3	Q9D8N0	Eef1g	50 kDa		0.002	1_4T1_cell high, 4T1_MV low, 4T1_sEV low	40	32	56	5	5	1	13	14	8	6	5	10
134	Keratin, type II cytoskeletal 1 OS=Homo sapiens OX=9606 GN=KRT1 PE=1 SV=6	cRAP054	KRT1	66 kDa	TRUE	0.73	[]	0	0	31	0	0	38	0	0	83	0	0	55
135	Albumin OS=Homo sapiens OX=9606 GN=ALB PE=1 SV=2	cRAP002	ALB	69 kDa	TRUE	0.7	[]	0	0	12	0	0	35	0	0	74	0	0	45
136	Keratin, type I cytoskeletal 19 OS=Mus musculus OX=10090 GN=Krt19 PE=1 SV=1	P19001	Krt19	45 kDa	TRUE	0.05	1_4T1_cell high, 4T1_MV low, 4T1_sEV low	49	56	15	8	8	4	12	11	5	4	3	1
137	14-3-3 protein sigma OS=Mus musculus OX=10090 GN=Sfn PE=1 SV=2	O70456	Sfn	28 kDa	TRUE	0.29	[]	32	34	35	0	0	5	23	24	12	11	10	6
138	Laminin subunit gamma-1 OS=Mus musculus OX=10090 GN=Lamc1 PE=1 SV=2	P02468	Lamc1	177 kDa		0.026	1_4T1_cell low, 4T1_MV low, 4T1_sEV high	0	1	1	20	22	0	0	3	0	34	33	65
139	Protein disulfide-isomerase OS=Mus musculus OX=10090 GN=P4hb PE=1 SV=2	P09103	P4hb	57 kDa		< 0.00010	1_4T1_cell high, 4T1_MV low, 4T1_sEV low	36	43	49	12	19	6	5	7	2	2	1	0
140	Fibulin-2 OS=Mus musculus OX=10090 GN=Fbln2 PE=1 SV=2	P37889	Fbln2	132 kDa		0.0011	1_4T1_cell low, 4T1_MV high, 4T1_sEV high	0	0	0	2	5	0	31	11	21	56	56	27
141	Histone H3.2 OS=Mus musculus OX=10090 GN=H3c2 PE=1 SV=2	P84228	H3c2	15 kDa	TRUE	0.0056	1_4T1_cell low, 4T1_MV low, 4T1_sEV high	0	0	4	0	0	0	6	12	0	19	17	31
142	Myb-binding protein 1A OS=Mus musculus OX=10090 GN=Mybbp1a PE=1 SV=2	Q7TPV4	Mybbp1a	152 kDa		< 0.00010	1_4T1_cell high, 4T1_MV low, 4T1_sEV low	57	60	74	0	0	0	3	0	0	4	4	3
143	Phosphoglycerate mutase 1 OS=Mus musculus OX=10090 GN=Pgam1 PE=1 SV=3	Q9DBJ1	Pgam1	29 kDa		0.0027	1_4T1_cell high, 4T1_MV low, 4T1_sEV low	43	43	39	11	13	6	16	13	6	5	6	4
144	Transferrin receptor protein 1 OS=Mus musculus OX=10090 GN=Tfrc PE=1 SV=1	Q62351	Tfrc	86 kDa		0.046	1_4T1_cell low, 4T1_MV high, 4T1_sEV high	6	7	19	1	1	5	31	26	29	22	26	17
145	Ephrin type-A receptor 2 OS=Mus musculus OX=10090 GN=Epha2 PE=1 SV=3	Q03145	Epha2	109 kDa	TRUE	0.00063	1_4T1_cell low, 4T1_MV high, 4T1_sEV high	2	2	6	7	7	5	23	19	16	36	39	28
146	Major vault protein OS=Mus musculus OX=10090 GN=Mvp PE=1 SV=4	Q9EQK5	Mvp	96 kDa		0.0058	1_4T1_cell low, 4T1_MV low, 4T1_sEV high	7	11	11	0	0	0	2	7	0	40	43	79
147	Bifunctional glutamate/proline--tRNA ligase OS=Mus musculus OX=10090 GN=Eprs1 PE=1 SV=4	Q8CGC7	Eprs1	170 kDa	TRUE	0.0015	1_4T1_cell high, 4T1_MV low, 4T1_sEV low	45	49	54	0	0	0	3	4	0	3	4	17
148	Tubulointerstitial nephritis antigen-like OS=Mus musculus OX=10090 GN=Tinagl1 PE=1 SV=1	Q99JR5	Tinagl1	53 kDa		0.0027	1_4T1_cell low, 4T1_MV high, 4T1_sEV high	0	0	1	1	4	0	50	17	28	37	39	22
149	Transmembrane protease serine 11E OS=Mus musculus OX=10090 GN=Tmprss11e PE=1 SV=2	Q5S248	Tmprss11e	48 kDa		< 0.00010	1_4T1_cell low, 4T1_MV high, 4T1_sEV high	2	2	3	29	29	9	13	16	15	25	28	22
150	Immunoglobulin superfamily member 8 OS=Mus musculus OX=10090 GN=Igsf8 PE=1 SV=2	Q8R366	Igsf8	65 kDa		< 0.00010	1_4T1_cell low, 4T1_MV low, 4T1_sEV high	0	1	0	0	0	0	12	10	17	53	63	41
151	Chloride intracellular channel protein 1 OS=Mus musculus OX=10090 GN=Clic1 PE=1 SV=3	Q9Z1Q5	Clic1	27 kDa		0.00069	1_4T1_cell low, 4T1_MV high, 4T1_sEV low	27	28	29	2	5	1	31	30	10	12	12	6
152	Guanine nucleotide-binding protein G(s) subunit alpha isoforms short OS=Mus musculus OX=10090 GN=Gnas PE=1 SV=1	P63094	Gnas	46 kDa	TRUE	0.0015	1_4T1_cell low, 4T1_MV high, 4T1_sEV high	10	14	11	6	7	4	31	26	14	25	26	15
153	Guanine nucleotide-binding protein G(I)/G(S)/G(T) subunit beta-2 OS=Mus musculus OX=10090 GN=Gnb2 PE=1 SV=3	P62880	Gnb2	37 kDa	TRUE	0.24	[]	14	12	12	4	5	7	25	24	12	19	24	16
154	Fascin OS=Mus musculus OX=10090 GN=Fscn1 PE=1 SV=4	Q61553	Fscn1	55 kDa		0.47	[]	23	26	40	8	5	18	21	19	10	5	7	10
155	Serine/threonine-protein phosphatase 2A 65 kDa regulatory subunit A alpha isoform OS=Mus musculus OX=10090 GN=Ppp2r1a PE=1 SV=3	Q76MZ3	Ppp2r1a	65 kDa	TRUE	0.00017	1_4T1_cell high, 4T1_MV low, 4T1_sEV low	43	44	44	0	0	0	16	15	4	9	12	3
156	Eukaryotic translation initiation factor 3 subunit A OS=Mus musculus OX=10090 GN=Eif3a PE=1 SV=5	P23116	Eif3a	162 kDa		< 0.00010	1_4T1_cell high, 4T1_MV low, 4T1_sEV low	43	43	50	0	0	0	6	7	1	5	5	8
157	ATP synthase subunit alpha, mitochondrial OS=Mus musculus OX=10090 GN=Atp5f1a PE=1 SV=1	Q03265	Atp5f1a	60 kDa		0.00028	1_4T1_cell high, 4T1_MV low, 4T1_sEV low	48	45	52	2	4	0	12	13	0	1	1	0
158	Junction plakoglobin OS=Mus musculus OX=10090 GN=Jup PE=1 SV=3	Q02257	Jup	82 kDa	TRUE	< 0.00010	1_4T1_cell low, 4T1_MV high, 4T1_sEV high	14	15	11	3	3	0	27	24	10	27	25	17
159	Prostaglandin G/H synthase 2 OS=Mus musculus OX=10090 GN=Ptgs2 PE=1 SV=1	Q05769	Ptgs2	69 kDa	TRUE	< 0.00010	1_4T1_cell low, 4T1_MV low, 4T1_sEV high	10	9	20	27	31	9	6	9	7	22	21	16
160	40S ribosomal protein S3 OS=Mus musculus OX=10090 GN=Rps3 PE=1 SV=1	P62908	Rps3	27 kDa		0.011	1_4T1_cell high, 4T1_MV low, 4T1_sEV low	37	35	45	0	3	0	12	11	5	10	8	20
161	ATP-citrate synthase OS=Mus musculus OX=10090 GN=Acly PE=1 SV=1	Q91V92	Acly	120 kDa		0.021	1_4T1_cell high, 4T1_MV low, 4T1_sEV low	36	33	47	0	0	0	9	11	0	7	6	20
162	Acid sphingomyelinase-like phosphodiesterase 3b OS=Mus musculus OX=10090 GN=Smpdl3b PE=1 SV=1	P58242	Smpdl3b	52 kDa		0.0078	1_4T1_cell low, 4T1_MV high, 4T1_sEV high	1	1	2	36	45	4	9	11	12	10	17	11
163	Transgelin-2 OS=Mus musculus OX=10090 GN=Tagln2 PE=1 SV=4	Q9WVA4	Tagln2	22 kDa		0.025	1_4T1_cell high, 4T1_MV high, 4T1_sEV low	24	24	40	12	15	2	14	20	13	4	6	6
164	Disintegrin and metalloproteinase domain-containing protein 10 OS=Mus musculus OX=10090 GN=Adam10 PE=1 SV=2	O35598	Adam10	84 kDa		< 0.00010	1_4T1_cell low, 4T1_MV low, 4T1_sEV high	0	0	0	6	5	2	2	2	4	48	49	42
165	Citrate synthase, mitochondrial OS=Mus musculus OX=10090 GN=Cs PE=1 SV=1	Q9CZU6	Cs	52 kDa		0.0021	1_4T1_cell high, 4T1_MV low, 4T1_sEV low	21	21	19	30	29	18	6	7	2	1	1	1
166	Collagen alpha-1(XVIII) chain OS=Mus musculus OX=10090 GN=Col18a1 PE=1 SV=4	P39061	Col18a1	182 kDa		0.0068	1_4T1_cell low, 4T1_MV high, 4T1_sEV high	0	0	1	4	5	0	37	17	27	32	32	15
167	AP-2 complex subunit beta OS=Mus musculus OX=10090 GN=Ap2b1 PE=1 SV=1	Q9DBG3	Ap2b1	105 kDa	TRUE	0.015	1_4T1_cell high, 4T1_MV low, 4T1_sEV low	30	34	35	4	6	0	13	11	6	9	13	5
168	40S ribosomal protein S2 OS=Mus musculus OX=10090 GN=Rps2 PE=1 SV=3	P25444	Rps2	31 kDa		0.00011	1_4T1_cell high, 4T1_MV low, 4T1_sEV low	25	28	39	0	2	0	9	11	4	9	10	11
169	Eukaryotic translation initiation factor 5A-1 OS=Mus musculus OX=10090 GN=Eif5a PE=1 SV=2	P63242	Eif5a	17 kDa		0.17	[]	29	32	35	3	5	4	10	9	7	5	8	4
170	Ras-related protein Rap-1b OS=Mus musculus OX=10090 GN=Rap1b PE=1 SV=2	Q99JI6	Rap1b	21 kDa	TRUE	0.024	1_4T1_cell low, 4T1_MV high, 4T1_sEV high	11	11	10	3	5	4	22	19	16	20	30	16
171	Voltage-dependent anion-selective channel protein 1 OS=Mus musculus OX=10090 GN=Vdac1 PE=1 SV=3	Q60932	Vdac1	32 kDa		0.043	1_4T1_cell high, 4T1_MV high, 4T1_sEV low	9	10	40	33	22	27	11	11	12	0	0	1
172	Cullin-associated NEDD8-dissociated protein 1 OS=Mus musculus OX=10090 GN=Cand1 PE=1 SV=2	Q6ZQ38	Cand1	136 kDa		0.0004	1_4T1_cell high, 4T1_MV low, 4T1_sEV low	39	48	43	0	0	0	10	13	0	3	5	0
173	Guanine nucleotide-binding protein G(i) subunit alpha OS=Mus musculus OX=10090 GN=Gnai3 PE=1 SV=3	Q9DC51	Gnai3	41 kDa	TRUE	< 0.00010	1_4T1_cell low, 4T1_MV high, 4T1_sEV high	7	10	11	2	3	0	32	24	16	19	26	16
174	Guanine nucleotide-binding protein G(I)/G(S)/G(T) subunit beta-1 OS=Mus musculus OX=10090 GN=Gnb1 PE=1 SV=3	P62874	Gnb1	37 kDa	TRUE	0.023	1_4T1_cell low, 4T1_MV high, 4T1_sEV high	10	10	11	11	12	7	19	17	13	13	20	15
175	EH domain-containing protein 2 OS=Mus musculus OX=10090 GN=Ehd2 PE=1 SV=1	Q8BH64	Ehd2	61 kDa	TRUE	0.00012	1_4T1_cell low, 4T1_MV low, 4T1_sEV high	4	4	8	0	0	0	19	14	9	34	42	18
176	26S proteasome non-ATPase regulatory subunit 2 OS=Mus musculus OX=10090 GN=Psmd2 PE=1 SV=1	Q8VDM4	Psmd2	100 kDa		0.00012	1_4T1_cell high, 4T1_MV low, 4T1_sEV low	32	38	41	0	0	0	10	8	1	8	9	11
177	40S ribosomal protein S4, X isoform OS=Mus musculus OX=10090 GN=Rps4x PE=1 SV=2	P62702	Rps4x	30 kDa		0.0032	1_4T1_cell high, 4T1_MV low, 4T1_sEV low	26	27	38	0	3	0	10	12	1	6	6	6
178	Glucose-6-phosphate isomerase OS=Mus musculus OX=10090 GN=Gpi PE=1 SV=4	P06745	Gpi	63 kDa		0.0011	1_4T1_cell high, 4T1_MV low, 4T1_sEV low	38	41	27	9	11	2	7	6	4	0	2	3
179	Vimentin OS=Mus musculus OX=10090 GN=Vim PE=1 SV=3	P20152	Vim	54 kDa	TRUE	0.029	1_4T1_cell low, 4T1_MV high, 4T1_sEV low	13	11	49	4	10	0	26	20	14	4	6	0
180	C-1-tetrahydrofolate synthase, cytoplasmic OS=Mus musculus OX=10090 GN=Mthfd1 PE=1 SV=4	Q922D8	Mthfd1	101 kDa	TRUE	0.012	1_4T1_cell high, 4T1_MV low, 4T1_sEV low	31	35	40	0	0	0	14	17	0	4	5	10
181	Sodium/potassium-transporting ATPase subunit beta-3 OS=Mus musculus OX=10090 GN=Atp1b3 PE=1 SV=1	P97370	Atp1b3	32 kDa		0.00021	1_4T1_cell low, 4T1_MV high, 4T1_sEV low	4	7	8	18	21	6	14	8	14	8	6	7
182	Trifunctional purine biosynthetic protein adenosine-3 OS=Mus musculus OX=10090 GN=Gart PE=1 SV=3	Q64737	Gart	108 kDa		< 0.00010	1_4T1_cell high, 4T1_MV low, 4T1_sEV low	40	47	46	0	0	0	8	10	0	2	4	4
183	Receptor of activated protein C kinase 1 OS=Mus musculus OX=10090 GN=Rack1 PE=1 SV=3	P68040	Rack1	35 kDa		0.013	1_4T1_cell high, 4T1_MV low, 4T1_sEV low	28	32	46	1	0	0	10	10	2	5	6	16
184	Tropomyosin alpha-4 chain OS=Mus musculus OX=10090 GN=Tpm4 PE=1 SV=3	Q6IRU2	Tpm4	28 kDa	TRUE	0.0049	1_4T1_cell high, 4T1_MV high, 4T1_sEV low	25	21	32	16	14	3	12	19	15	1	1	1
185	Annexin A4 OS=Mus musculus OX=10090 GN=Anxa4 PE=1 SV=4	P97429	Anxa4	36 kDa		0.005	1_4T1_cell low, 4T1_MV high, 4T1_sEV high	17	15	15	1	1	1	18	17	15	14	14	18
186	Epithelial cell adhesion molecule OS=Mus musculus OX=10090 GN=Epcam PE=1 SV=1	Q99JW5	Epcam	35 kDa		0.06	[]	10	10	4	9	15	0	15	17	12	22	21	33
187	Nucleoside diphosphate kinase B OS=Mus musculus OX=10090 GN=Nme2 PE=1 SV=1	Q01768	Nme2	17 kDa	TRUE	0.015	1_4T1_cell high, 4T1_MV high, 4T1_sEV low	19	19	27	13	15	9	9	9	11	4	2	3
188	Spectrin beta chain, non-erythrocytic 1 OS=Mus musculus OX=10090 GN=Sptbn1 PE=1 SV=2	Q62261	Sptbn1	274 kDa	TRUE	0.0084	1_4T1_cell high, 4T1_MV high, 4T1_sEV low	14	18	36	6	6	0	24	30	7	0	0	0
189	Arrestin domain-containing protein 1 OS=Mus musculus OX=10090 GN=Arrdc1 PE=1 SV=2	Q99KN1	Arrdc1	46 kDa		< 0.00010	1_4T1_cell low, 4T1_MV low, 4T1_sEV high	0	0	0	0	1	0	5	4	5	45	54	42
190	Myosin-14 OS=Mus musculus OX=10090 GN=Myh14 PE=1 SV=1	Q6URW6	Myh14	229 kDa	TRUE	0.054	[]	45	44	17	0	0	0	8	15	0	0	0	10
191	5'-nucleotidase OS=Mus musculus OX=10090 GN=Nt5e PE=1 SV=2	Q61503	Nt5e	64 kDa		0.026	1_4T1_cell low, 4T1_MV high, 4T1_sEV high	0	0	0	23	24	2	17	18	15	15	18	22
192	Protein Niban 2 OS=Mus musculus OX=10090 GN=Niban2 PE=1 SV=2	Q8R1F1	Niban2	85 kDa		< 0.00010	1_4T1_cell low, 4T1_MV high, 4T1_sEV low	20	18	20	0	0	0	19	26	12	7	8	6
193	Lysyl oxidase homolog 4 OS=Mus musculus OX=10090 GN=Loxl4 PE=2 SV=2	Q924C6	Loxl4	85 kDa		0.0055	1_4T1_cell low, 4T1_MV high, 4T1_sEV high	0	0	0	0	0	0	36	11	20	36	38	13
194	Aldehyde dehydrogenase, mitochondrial OS=Mus musculus OX=10090 GN=Aldh2 PE=1 SV=1	P47738	Aldh2	57 kDa	TRUE	0.2	[]	39	39	33	4	5	8	6	13	0	0	0	3
195	Brain acid soluble protein 1 OS=Mus musculus OX=10090 GN=Basp1 PE=1 SV=3	Q91XV3	Basp1	22 kDa		0.7	[]	8	9	28	0	0	7	11	13	32	7	9	34
196	Adenosylhomocysteinase OS=Mus musculus OX=10090 GN=Ahcy PE=1 SV=3	P50247	Ahcy	48 kDa		0.0028	1_4T1_cell high, 4T1_MV low, 4T1_sEV low	26	29	33	2	3	0	15	10	8	10	8	12
197	Heterogeneous nuclear ribonucleoprotein K OS=Mus musculus OX=10090 GN=Hnrnpk PE=1 SV=1	P61979	Hnrnpk	51 kDa		< 0.00010	1_4T1_cell high, 4T1_MV low, 4T1_sEV low	40	42	54	0	3	0	3	4	1	6	4	3
198	Keratin, type I cytoskeletal 14 OS=Homo sapiens OX=9606 GN=KRT14 PE=1 SV=4	P02533	KRT14	52 kDa	TRUE	0.14	[]	9	10	0	31	31	0	20	17	0	8	8	0
199	Agrin OS=Mus musculus OX=10090 GN=Agrn PE=1 SV=1	A2ASQ1	Agrn	208 kDa		0.0069	1_4T1_cell low, 4T1_MV low, 4T1_sEV high	0	0	0	5	9	0	2	3	0	37	38	71
200	Calmodulin-1 OS=Mus musculus OX=10090 GN=Calm1 PE=1 SV=1	P0DP26 (+2)	Calm1	17 kDa		< 0.00010	1_4T1_cell low, 4T1_MV high, 4T1_sEV low	8	8	8	25	24	9	14	16	12	6	10	8
201	Copine-8 OS=Mus musculus OX=10090 GN=Cpne8 PE=2 SV=3	Q9DC53	Cpne8	65 kDa	TRUE	0.0011	1_4T1_cell low, 4T1_MV low, 4T1_sEV high	1	2	3	3	3	1	9	9	14	33	36	45
202	Brain-specific angiogenesis inhibitor 1-associated protein 2 OS=Mus musculus OX=10090 GN=Baiap2 PE=1 SV=2	Q8BKX1	Baiap2	59 kDa		0.053	[]	10	9	6	1	0	1	13	18	18	15	13	30
203	Putative helicase MOV-10 OS=Mus musculus OX=10090 GN=Mov10 PE=1 SV=2	P23249	Mov10	114 kDa		0.0015	1_4T1_cell low, 4T1_MV high, 4T1_sEV high	7	9	10	0	0	0	13	20	15	20	27	12
204	Stress-induced-phosphoprotein 1 OS=Mus musculus OX=10090 GN=Stip1 PE=1 SV=1	Q60864	Stip1	63 kDa		< 0.00010	1_4T1_cell high, 4T1_MV low, 4T1_sEV low	34	35	44	0	0	0	7	10	3	3	4	4
205	Phosphoserine aminotransferase OS=Mus musculus OX=10090 GN=Psat1 PE=1 SV=1	Q99K85	Psat1	40 kDa		0.00014	1_4T1_cell high, 4T1_MV high, 4T1_sEV low	28	27	35	3	4	1	13	15	5	7	9	6
206	Inosine-5'-monophosphate dehydrogenase 2 OS=Mus musculus OX=10090 GN=Impdh2 PE=1 SV=2	P24547	Impdh2	56 kDa		< 0.00010	1_4T1_cell high, 4T1_MV low, 4T1_sEV low	40	40	56	2	2	0	8	6	0	1	1	3
207	Annexin A11 OS=Mus musculus OX=10090 GN=Anxa11 PE=1 SV=2	P97384	Anxa11	54 kDa		0.015	1_4T1_cell low, 4T1_MV high, 4T1_sEV high	16	17	14	4	0	0	14	11	14	17	18	21
208	Vacuolar protein sorting-associated protein 35 OS=Mus musculus OX=10090 GN=Vps35 PE=1 SV=1	Q9EQH3	Vps35	92 kDa		0.013	1_4T1_cell high, 4T1_MV low, 4T1_sEV low	32	31	32	0	0	0	17	18	1	7	6	9
209	Histone H1.5 OS=Mus musculus OX=10090 GN=H1-5 PE=1 SV=2	P43276	H1-5	23 kDa	TRUE	0.064	[]	10	10	26	2	0	0	5	9	2	17	22	54
210	Cytoplasmic FMR1-interacting protein 1 OS=Mus musculus OX=10090 GN=Cyfip1 PE=1 SV=1	Q7TMB8	Cyfip1	145 kDa		< 0.00010	1_4T1_cell low, 4T1_MV high, 4T1_sEV high	9	7	16	0	0	0	20	23	10	19	27	18
211	Keratin, type II cytoskeletal 5 OS=Homo sapiens OX=9606 GN=KRT5 PE=1 SV=3	P13647	KRT5	62 kDa	TRUE	0.11	[]	4	0	0	31	43	0	19	19	0	12	9	0
212	Peroxiredoxin-6 OS=Mus musculus OX=10090 GN=Prdx6 PE=1 SV=3	O08709	Prdx6	25 kDa		0.00032	1_4T1_cell high, 4T1_MV high, 4T1_sEV low	26	31	33	0	1	1	13	13	4	5	5	4
213	Nucleophosmin OS=Mus musculus OX=10090 GN=Npm1 PE=1 SV=1	Q61937	Npm1	33 kDa		0.00045	1_4T1_cell high, 4T1_MV low, 4T1_sEV low	33	39	44	4	6	0	6	8	2	5	4	3
214	Tropomyosin alpha-1 chain OS=Mus musculus OX=10090 GN=Tpm1 PE=1 SV=1	P58771	Tpm1	33 kDa	TRUE	0.041	1_4T1_cell high, 4T1_MV high, 4T1_sEV low	20	18	41	11	14	1	12	17	12	2	1	1
215	Ras-related protein Rab-7a OS=Mus musculus OX=10090 GN=Rab7a PE=1 SV=2	P51150	Rab7a	23 kDa		< 0.00010	1_4T1_cell low, 4T1_MV high, 4T1_sEV high	15	15	15	0	0	0	21	21	14	16	19	16
216	Exportin-2 OS=Mus musculus OX=10090 GN=Cse1l PE=1 SV=1	Q9ERK4	Cse1l	110 kDa		< 0.00010	1_4T1_cell high, 4T1_MV low, 4T1_sEV low	37	41	41	0	0	0	6	6	0	3	1	2
217	Alanine--tRNA ligase, cytoplasmic OS=Mus musculus OX=10090 GN=Aars1 PE=1 SV=1	Q8BGQ7	Aars1	107 kDa		0.044	1_4T1_cell high, 4T1_MV low, 4T1_sEV low	33	40	34	1	4	0	6	6	0	3	3	17
218	60S ribosomal protein L4 OS=Mus musculus OX=10090 GN=Rpl4 PE=1 SV=3	Q9D8E6	Rpl4	47 kDa		0.00017	1_4T1_cell high, 4T1_MV low, 4T1_sEV low	29	31	39	0	1	0	7	5	0	8	8	11
219	Prolyl endopeptidase OS=Mus musculus OX=10090 GN=Prep PE=1 SV=1	Q9QUR6	Prep	81 kDa		0.00035	1_4T1_cell high, 4T1_MV low, 4T1_sEV low	34	39	43	2	5	0	8	10	1	3	1	3
220	ATP-dependent RNA helicase DDX3X OS=Mus musculus OX=10090 GN=Ddx3x PE=1 SV=3	Q62167	Ddx3x	73 kDa	TRUE	< 0.00010	1_4T1_cell high, 4T1_MV low, 4T1_sEV low	32	32	41	0	0	0	7	8	3	6	6	9
221	Heterogeneous nuclear ribonucleoprotein U OS=Mus musculus OX=10090 GN=Hnrnpu PE=1 SV=1	Q8VEK3	Hnrnpu	88 kDa		0.00057	1_4T1_cell high, 4T1_MV low, 4T1_sEV low	20	26	46	0	0	0	5	4	0	5	6	4
222	Nicastrin OS=Mus musculus OX=10090 GN=Ncstn PE=1 SV=3	P57716	Ncstn	78 kDa		0.025	1_4T1_cell low, 4T1_MV high, 4T1_sEV high	3	2	1	37	44	2	10	8	5	7	8	5
223	Choline transporter-like protein 2 OS=Mus musculus OX=10090 GN=Slc44a2 PE=1 SV=2	Q8BY89	Slc44a2	80 kDa		< 0.00010	1_4T1_cell low, 4T1_MV low, 4T1_sEV high	0	1	0	14	16	4	7	8	5	23	20	22
224	Adenylyl cyclase-associated protein 1 OS=Mus musculus OX=10090 GN=Cap1 PE=1 SV=4	P40124	Cap1	52 kDa		0.012	1_4T1_cell high, 4T1_MV high, 4T1_sEV low	21	25	29	9	11	1	12	15	8	3	1	2
225	Ras-related C3 botulinum toxin substrate 1 OS=Mus musculus OX=10090 GN=Rac1 PE=1 SV=1	P63001	Rac1	21 kDa	TRUE	0.095	[]	8	8	12	11	10	5	12	11	18	13	17	16
226	Band 4.1-like protein 2 OS=Mus musculus OX=10090 GN=Epb41l2 PE=1 SV=2	O70318	Epb41l2	110 kDa		0.064	[]	16	15	16	3	2	0	18	22	3	10	10	7
227	Calreticulin OS=Mus musculus OX=10090 GN=Calr PE=1 SV=1	P14211	Calr	48 kDa		0.00056	1_4T1_cell high, 4T1_MV low, 4T1_sEV low	33	33	42	3	4	3	1	2	1	0	0	0
228	Nucleoside diphosphate kinase A OS=Mus musculus OX=10090 GN=Nme1 PE=1 SV=1	P15532	Nme1	17 kDa	TRUE	0.012	1_4T1_cell high, 4T1_MV high, 4T1_sEV low	17	18	28	13	13	9	8	7	5	2	4	1
229	Ras-related protein Rab-1A OS=Mus musculus OX=10090 GN=Rab1A PE=1 SV=3	P62821	Rab1A	23 kDa	TRUE	0.037	1_4T1_cell low, 4T1_MV high, 4T1_sEV high	12	14	19	3	3	0	14	13	14	9	11	14
230	Peroxiredoxin-2 OS=Mus musculus OX=10090 GN=Prdx2 PE=1 SV=3	Q61171	Prdx2	22 kDa		0.27	[]	21	22	25	6	6	8	10	10	6	6	4	3
231	Collagen alpha-2(IV) chain OS=Mus musculus OX=10090 GN=Col4a2 PE=1 SV=4	P08122	Col4a2	167 kDa		0.008	1_4T1_cell low, 4T1_MV high, 4T1_sEV high	0	0	0	8	7	0	34	18	17	24	24	8
232	Voltage-dependent anion-selective channel protein 2 OS=Mus musculus OX=10090 GN=Vdac2 PE=1 SV=2	Q60930	Vdac2	32 kDa		0.00026	1_4T1_cell high, 4T1_MV high, 4T1_sEV low	5	5	21	31	37	17	4	5	9	0	0	0
233	Poly(rC)-binding protein 2 OS=Mus musculus OX=10090 GN=Pcbp2 PE=1 SV=1	Q61990	Pcbp2	38 kDa	TRUE	0.011	1_4T1_cell low, 4T1_MV high, 4T1_sEV high	19	19	21	1	2	0	12	13	11	16	16	6
234	S-formylglutathione hydrolase OS=Mus musculus OX=10090 GN=Esd PE=1 SV=1	Q9R0P3	Esd	31 kDa		0.0021	1_4T1_cell high, 4T1_MV low, 4T1_sEV low	21	30	36	0	0	0	9	8	2	3	3	9
235	Eukaryotic translation initiation factor 4 gamma 1 OS=Mus musculus OX=10090 GN=Eif4g1 PE=1 SV=1	Q6NZJ6	Eif4g1	176 kDa	TRUE	< 0.00010	1_4T1_cell high, 4T1_MV low, 4T1_sEV low	29	33	43	0	0	0	3	5	1	2	1	1
236	S-methyl-5'-thioadenosine phosphorylase OS=Mus musculus OX=10090 GN=Mtap PE=1 SV=1	Q9CQ65	Mtap	31 kDa		0.11	[]	27	29	20	5	7	1	10	11	3	8	3	6
237	Gelsolin OS=Mus musculus OX=10090 GN=Gsn PE=1 SV=3	P13020	Gsn	86 kDa	TRUE	0.0004	1_4T1_cell high, 4T1_MV high, 4T1_sEV low	22	20	27	1	1	1	11	11	7	5	7	5
238	40S ribosomal protein S3a OS=Mus musculus OX=10090 GN=Rps3a PE=1 SV=3	P97351	Rps3a	30 kDa		0.0005	1_4T1_cell high, 4T1_MV low, 4T1_sEV low	21	24	36	0	0	0	6	5	6	7	5	6
239	Glycine--tRNA ligase OS=Mus musculus OX=10090 GN=Gars1 PE=1 SV=1	Q9CZD3	Gars1	82 kDa		0.0047	1_4T1_cell high, 4T1_MV low, 4T1_sEV low	26	33	34	0	0	0	6	9	0	5	3	11
240	Keratin, type I cytoskeletal 14 OS=Mus musculus OX=10090 GN=Krt14 PE=1 SV=2	Q61781	Krt14	53 kDa	TRUE	0.086	[]	14	14	6	18	15	0	0	0	0	0	0	0
241	Serine/threonine-protein phosphatase PP1-alpha catalytic subunit OS=Mus musculus OX=10090 GN=Ppp1ca PE=1 SV=1	P62137	Ppp1ca	38 kDa	TRUE	0.0092	1_4T1_cell high, 4T1_MV high, 4T1_sEV low	22	23	26	4	4	1	13	13	4	7	9	5
242	Isoleucine--tRNA ligase, cytoplasmic OS=Mus musculus OX=10090 GN=Iars1 PE=1 SV=2	Q8BU30	Iars1	144 kDa		0.056	[]	21	22	35	0	0	0	6	6	0	4	5	17
243	Eukaryotic initiation factor 4A-II OS=Mus musculus OX=10090 GN=Eif4a2 PE=1 SV=2	P10630	Eif4a2	46 kDa	TRUE	< 0.00010	1_4T1_cell high, 4T1_MV low, 4T1_sEV low	20	18	30	0	0	0	0	0	0	0	0	0
244	Arginine--tRNA ligase, cytoplasmic OS=Mus musculus OX=10090 GN=Rars1 PE=1 SV=2	Q9D0I9	Rars1	76 kDa		0.00014	1_4T1_cell high, 4T1_MV low, 4T1_sEV low	31	34	35	0	0	0	9	9	0	2	1	0
245	Polypyrimidine tract-binding protein 1 OS=Mus musculus OX=10090 GN=Ptbp1 PE=1 SV=2	P17225	Ptbp1	56 kDa	TRUE	< 0.00010	1_4T1_cell high, 4T1_MV low, 4T1_sEV low	33	36	46	0	0	0	1	3	0	3	2	0
246	Glutamate dehydrogenase 1, mitochondrial OS=Mus musculus OX=10090 GN=Glud1 PE=1 SV=1	P26443	Glud1	61 kDa		0.0019	1_4T1_cell high, 4T1_MV low, 4T1_sEV low	21	23	28	22	14	10	3	3	0	0	0	0
247	60S ribosomal protein L7 OS=Mus musculus OX=10090 GN=Rpl7 PE=1 SV=2	P14148	Rpl7	31 kDa		0.0079	1_4T1_cell high, 4T1_MV low, 4T1_sEV low	19	18	43	0	0	0	9	8	1	8	7	9
248	60S ribosomal protein L6 OS=Mus musculus OX=10090 GN=Rpl6 PE=1 SV=3	P47911	Rpl6	34 kDa		0.0001	1_4T1_cell high, 4T1_MV low, 4T1_sEV low	25	22	33	0	0	0	8	7	2	8	8	10
249	Aconitate hydratase, mitochondrial OS=Mus musculus OX=10090 GN=Aco2 PE=1 SV=1	Q99KI0	Aco2	85 kDa		< 0.00010	1_4T1_cell high, 4T1_MV low, 4T1_sEV low	36	37	36	1	0	0	3	9	0	0	0	0
250	Cell surface A33 antigen OS=Mus musculus OX=10090 GN=Gpa33 PE=2 SV=2	Q9JKA5	Gpa33	36 kDa		< 0.00010	1_4T1_cell low, 4T1_MV high, 4T1_sEV high	4	4	3	20	18	5	9	8	7	10	12	14
251	Ras-related protein Rab-10 OS=Mus musculus OX=10090 GN=Rab10 PE=1 SV=1	P61027	Rab10	23 kDa	TRUE	0.015	1_4T1_cell low, 4T1_MV high, 4T1_sEV high	8	10	11	3	3	0	10	11	9	9	13	14
252	CUB domain-containing protein 1 OS=Mus musculus OX=10090 GN=Cdcp1 PE=2 SV=1	Q5U462	Cdcp1	93 kDa		< 0.00010	1_4T1_cell low, 4T1_MV low, 4T1_sEV high	0	0	2	26	23	7	3	3	1	14	11	15
253	Probable ATP-dependent RNA helicase DDX5 OS=Mus musculus OX=10090 GN=Ddx5 PE=1 SV=2	Q61656	Ddx5	69 kDa	TRUE	< 0.00010	1_4T1_cell high, 4T1_MV low, 4T1_sEV low	33	30	46	0	0	0	1	1	0	2	4	5
254	Multifunctional protein ADE2 OS=Mus musculus OX=10090 GN=Paics PE=1 SV=4	Q9DCL9	Paics	47 kDa		0.0044	1_4T1_cell high, 4T1_MV low, 4T1_sEV low	28	26	35	1	0	0	9	13	1	5	9	1
255	Keratin, type II cytoskeletal 2 epidermal OS=Homo sapiens OX=9606 GN=KRT2 PE=1 SV=2	cRAP053	KRT2	65 kDa	TRUE	0.78	[]	0	0	20	0	0	15	0	0	52	0	0	33
256	60S ribosomal protein L5 OS=Mus musculus OX=10090 GN=Rpl5 PE=1 SV=3	P47962	Rpl5	34 kDa		0.00046	1_4T1_cell high, 4T1_MV low, 4T1_sEV high	22	18	31	0	1	0	6	6	0	9	9	8
257	Exportin-1 OS=Mus musculus OX=10090 GN=Xpo1 PE=1 SV=1	Q6P5F9	Xpo1	123 kDa		< 0.00010	1_4T1_cell high, 4T1_MV low, 4T1_sEV low	32	37	28	0	0	0	4	5	0	0	2	0
258	Tumor susceptibility gene 101 protein OS=Mus musculus OX=10090 GN=Tsg101 PE=1 SV=2	Q61187	Tsg101	44 kDa		< 0.00010	1_4T1_cell low, 4T1_MV low, 4T1_sEV high	3	5	3	2	2	1	7	9	8	29	33	23
259	Septin-7 OS=Mus musculus OX=10090 GN=Septin7 PE=1 SV=1	O55131	Septin7	51 kDa	TRUE	< 0.00010	1_4T1_cell high, 4T1_MV high, 4T1_sEV low	26	23	27	1	1	0	13	15	8	3	3	5
260	Plasma membrane calcium-transporting ATPase 1 OS=Mus musculus OX=10090 GN=Atp2b1 PE=1 SV=1	G5E829	Atp2b1	135 kDa		< 0.00010	1_4T1_cell low, 4T1_MV high, 4T1_sEV low	10	8	7	0	0	0	21	17	14	9	12	9
261	Leucine-rich PPR motif-containing protein, mitochondrial OS=Mus musculus OX=10090 GN=Lrpprc PE=1 SV=2	Q6PB66	Lrpprc	157 kDa		< 0.00010	1_4T1_cell high, 4T1_MV low, 4T1_sEV low	33	35	38	0	0	0	0	1	0	0	0	0
262	60S ribosomal protein L7a OS=Mus musculus OX=10090 GN=Rpl7a PE=1 SV=2	P12970	Rpl7a	30 kDa		0.00014	1_4T1_cell high, 4T1_MV low, 4T1_sEV low	24	26	38	0	2	0	6	5	1	7	6	8
263	Galectin-3-binding protein OS=Mus musculus OX=10090 GN=Lgals3bp PE=1 SV=1	Q07797	Lgals3bp	64 kDa		< 0.00010	1_4T1_cell low, 4T1_MV low, 4T1_sEV high	0	0	0	2	3	0	0	0	0	37	40	44
264	Peptidyl-prolyl cis-trans isomerase B OS=Mus musculus OX=10090 GN=Ppib PE=1 SV=2	P24369	Ppib	24 kDa		0.00062	1_4T1_cell high, 4T1_MV high, 4T1_sEV low	10	14	22	17	15	8	6	5	5	3	1	1
265	Gap junction alpha-1 protein OS=Mus musculus OX=10090 GN=Gja1 PE=1 SV=2	P23242	Gja1	43 kDa		0.015	1_4T1_cell low, 4T1_MV high, 4T1_sEV high	0	1	1	0	0	2	14	16	17	29	31	10
266	Neutral amino acid transporter B(0) OS=Mus musculus OX=10090 GN=Slc1a5 PE=1 SV=2	P51912	Slc1a5	58 kDa		0.13	[]	2	2	3	9	8	5	10	8	20	17	15	20
267	ADP/ATP translocase 2 OS=Mus musculus OX=10090 GN=Slc25a5 PE=1 SV=3	P51881	Slc25a5	33 kDa	TRUE	0.00018	1_4T1_cell high, 4T1_MV high, 4T1_sEV low	27	27	31	1	3	1	8	10	7	3	2	0
268	ADP-ribosylation factor 3 OS=Mus musculus OX=10090 GN=Arf3 PE=2 SV=2	P61205 (+1)	Arf3	21 kDa	TRUE	< 0.00010	1_4T1_cell low, 4T1_MV high, 4T1_sEV high	12	13	17	1	3	0	17	15	9	13	14	9
269	Poly(rC)-binding protein 1 OS=Mus musculus OX=10090 GN=Pcbp1 PE=1 SV=1	P60335	Pcbp1	37 kDa	TRUE	0.0072	1_4T1_cell high, 4T1_MV high, 4T1_sEV low	23	25	22	1	1	0	7	12	9	8	9	4
270	DNA damage-binding protein 1 OS=Mus musculus OX=10090 GN=Ddb1 PE=1 SV=2	Q3U1J4	Ddb1	127 kDa		0.012	1_4T1_cell high, 4T1_MV low, 4T1_sEV low	20	25	41	7	7	0	3	4	0	0	0	0
271	Regulator of nonsense transcripts 1 OS=Mus musculus OX=10090 GN=Upf1 PE=1 SV=2	Q9EPU0	Upf1	124 kDa		0.0012	1_4T1_cell high, 4T1_MV low, 4T1_sEV low	29	25	33	4	4	0	4	4	0	3	3	4
272	40S ribosomal protein SA OS=Mus musculus OX=10090 GN=Rpsa PE=1 SV=4	P14206	Rpsa	33 kDa		0.059	[]	25	24	29	1	2	0	9	8	3	3	4	14
273	Coxsackievirus and adenovirus receptor homolog OS=Mus musculus OX=10090 GN=Cxadr PE=1 SV=1	P97792	Cxadr	40 kDa		0.00012	1_4T1_cell low, 4T1_MV high, 4T1_sEV high	0	0	5	25	33	6	4	5	9	8	9	14
274	Golgi apparatus protein 1 OS=Mus musculus OX=10090 GN=Glg1 PE=1 SV=1	Q61543	Glg1	134 kDa		< 0.00010	1_4T1_cell high, 4T1_MV low, 4T1_sEV high	7	12	14	21	23	6	0	0	0	7	7	3
275	CD44 antigen OS=Mus musculus OX=10090 GN=Cd44 PE=1 SV=3	P15379	Cd44	86 kDa		0.1	[]	3	2	6	1	1	1	15	12	28	15	14	20
276	ATP-binding cassette sub-family E member 1 OS=Mus musculus OX=10090 GN=Abce1 PE=1 SV=1	P61222	Abce1	67 kDa		0.013	1_4T1_cell high, 4T1_MV low, 4T1_sEV low	18	22	29	0	0	0	8	10	0	4	4	8
277	Disco-interacting protein 2 homolog B OS=Mus musculus OX=10090 GN=Dip2b PE=1 SV=1	Q3UH60	Dip2b	171 kDa	TRUE	< 0.00010	1_4T1_cell low, 4T1_MV low, 4T1_sEV high	0	0	0	5	5	0	2	2	2	29	32	31
278	ADP/ATP translocase 1 OS=Mus musculus OX=10090 GN=Slc25a4 PE=1 SV=4	P48962	Slc25a4	33 kDa	TRUE	0.0063	1_4T1_cell high, 4T1_MV high, 4T1_sEV low	24	25	33	3	4	2	8	9	9	3	0	0
279	ATP-dependent 6-phosphofructokinase, liver type OS=Mus musculus OX=10090 GN=Pfkl PE=1 SV=4	P12382	Pfkl	85 kDa	TRUE	0.0022	1_4T1_cell high, 4T1_MV low, 4T1_sEV low	30	30	26	0	0	0	7	10	0	1	3	5
280	Calpain-5 OS=Mus musculus OX=10090 GN=Capn5 PE=1 SV=1	O08688	Capn5	73 kDa		< 0.00010	1_4T1_cell low, 4T1_MV low, 4T1_sEV high	1	2	0	0	0	0	6	10	2	26	35	25
281	6-phosphogluconate dehydrogenase, decarboxylating OS=Mus musculus OX=10090 GN=Pgd PE=1 SV=3	Q9DCD0	Pgd	53 kDa		0.0023	1_4T1_cell high, 4T1_MV high, 4T1_sEV low	24	22	22	0	0	1	10	12	4	4	5	3
282	Peroxidasin homolog OS=Mus musculus OX=10090 GN=Pxdn PE=1 SV=2	Q3UQ28	Pxdn	165 kDa		0.0013	1_4T1_cell low, 4T1_MV low, 4T1_sEV high	0	0	0	1	1	0	8	2	1	35	36	12
283	Threonine--tRNA ligase 1, cytoplasmic OS=Mus musculus OX=10090 GN=Tars1 PE=1 SV=2	Q9D0R2	Tars1	83 kDa	TRUE	0.0028	1_4T1_cell high, 4T1_MV low, 4T1_sEV low	26	25	31	4	4	0	5	6	0	0	2	3
284	40S ribosomal protein S9 OS=Mus musculus OX=10090 GN=Rps9 PE=1 SV=3	Q6ZWN5	Rps9	23 kDa		0.017	1_4T1_cell high, 4T1_MV low, 4T1_sEV high	14	14	22	0	3	0	3	4	1	6	5	9
285	Eukaryotic translation initiation factor 3 subunit L OS=Mus musculus OX=10090 GN=Eif3l PE=1 SV=1	Q8QZY1	Eif3l	67 kDa		0.021	1_4T1_cell high, 4T1_MV low, 4T1_sEV high	21	22	28	0	0	0	5	4	1	3	4	13
286	60S ribosomal protein L3 OS=Mus musculus OX=10090 GN=Rpl3 PE=1 SV=3	P27659	Rpl3	46 kDa		< 0.00010	1_4T1_cell high, 4T1_MV low, 4T1_sEV high	21	21	27	0	0	0	3	3	1	7	8	7
287	26S proteasome regulatory subunit 7 OS=Mus musculus OX=10090 GN=Psmc2 PE=1 SV=5	P46471	Psmc2	49 kDa		0.00029	1_4T1_cell high, 4T1_MV low, 4T1_sEV low	22	23	36	0	0	0	4	5	0	4	4	7
288	Kinesin-1 heavy chain OS=Mus musculus OX=10090 GN=Kif5b PE=1 SV=3	Q61768	Kif5b	110 kDa		0.0054	1_4T1_cell high, 4T1_MV low, 4T1_sEV low	24	26	31	0	0	0	14	10	0	3	4	1
289	Proliferation-associated protein 2G4 OS=Mus musculus OX=10090 GN=Pa2g4 PE=1 SV=3	P50580	Pa2g4	44 kDa		< 0.00010	1_4T1_cell high, 4T1_MV low, 4T1_sEV low	28	26	34	0	0	0	7	6	2	4	2	5
290	Adenine phosphoribosyltransferase OS=Mus musculus OX=10090 GN=Aprt PE=1 SV=2	P08030 (+1)	Aprt	20 kDa		0.0027	1_4T1_cell high, 4T1_MV low, 4T1_sEV high	18	20	27	0	0	0	8	9	2	8	6	11
291	Protein disulfide-isomerase A6 OS=Mus musculus OX=10090 GN=Pdia6 PE=1 SV=3	Q922R8	Pdia6	48 kDa		< 0.00010	1_4T1_cell high, 4T1_MV low, 4T1_sEV low	27	31	34	0	1	1	7	8	2	1	2	1
292	Heterogeneous nuclear ribonucleoprotein Q OS=Mus musculus OX=10090 GN=Syncrip PE=1 SV=2	Q7TMK9	Syncrip	70 kDa		0.00088	1_4T1_cell high, 4T1_MV low, 4T1_sEV low	20	25	43	1	2	0	5	7	1	3	4	2
293	Collagen alpha-1(VII) chain OS=Mus musculus OX=10090 GN=Col7a1 PE=1 SV=3	Q63870	Col7a1	295 kDa		0.17	[]	0	0	1	1	1	0	45	12	1	14	19	7
294	Septin-2 OS=Mus musculus OX=10090 GN=Septin2 PE=1 SV=2	P42208	Septin2	42 kDa		0.084	[]	15	15	17	3	3	1	13	13	6	4	3	10
295	Transforming protein RhoA OS=Mus musculus OX=10090 GN=Rhoa PE=1 SV=1	Q9QUI0	Rhoa	22 kDa	TRUE	0.062	[]	10	10	18	2	2	0	12	11	15	9	10	14
296	Peptidyl-prolyl cis-trans isomerase D OS=Mus musculus OX=10090 GN=Ppid PE=1 SV=3	Q9CR16	Ppid	41 kDa	TRUE	< 0.00010	1_4T1_cell high, 4T1_MV low, 4T1_sEV low	31	33	32	0	0	0	6	6	2	2	1	0
297	Glypican-1 OS=Mus musculus OX=10090 GN=Gpc1 PE=1 SV=1	Q9QZF2	Gpc1	61 kDa		0.016	1_4T1_cell low, 4T1_MV low, 4T1_sEV high	0	0	0	0	0	0	9	10	10	17	20	39
298	Lysine--tRNA ligase OS=Mus musculus OX=10090 GN=Kars1 PE=1 SV=1	Q99MN1	Kars1	68 kDa		0.0036	1_4T1_cell high, 4T1_MV low, 4T1_sEV low	21	21	32	0	1	0	2	5	0	0	1	7
299	Calnexin OS=Mus musculus OX=10090 GN=Canx PE=1 SV=1	P35564	Canx	67 kDa		0.0057	1_4T1_cell high, 4T1_MV high, 4T1_sEV low	18	20	41	2	3	1	6	7	7	0	1	0
300	Nck-associated protein 1 OS=Mus musculus OX=10090 GN=Nckap1 PE=1 SV=2	P28660	Nckap1	129 kDa		< 0.00010	1_4T1_cell low, 4T1_MV high, 4T1_sEV high	7	8	7	0	0	0	15	17	8	12	16	13
301	Peptidyl-prolyl cis-trans isomerase FKBP4 OS=Mus musculus OX=10090 GN=Fkbp4 PE=1 SV=5	P30416	Fkbp4	52 kDa		0.0015	1_4T1_cell high, 4T1_MV low, 4T1_sEV low	26	27	22	1	4	0	5	7	1	1	0	1
302	116 kDa U5 small nuclear ribonucleoprotein component OS=Mus musculus OX=10090 GN=Eftud2 PE=1 SV=1	O08810	Eftud2	109 kDa	TRUE	< 0.00010	1_4T1_cell high, 4T1_MV low, 4T1_sEV low	21	22	38	0	0	0	2	0	0	4	4	5
303	Cyclin-dependent kinase 1 OS=Mus musculus OX=10090 GN=Cdk1 PE=1 SV=3	P11440	Cdk1	34 kDa	TRUE	< 0.00010	1_4T1_cell high, 4T1_MV low, 4T1_sEV low	25	23	26	0	0	0	9	6	2	4	5	3
304	Streptavidin OS=Streptomyces avidinii OX=1895 PE=1 SV=1	P22629		19 kDa		0.32	[]	8	10	0	14	25	0	15	16	0	14	15	0
305	Plastin-2 OS=Mus musculus OX=10090 GN=Lcp1 PE=1 SV=4	Q61233	Lcp1	70 kDa	TRUE	0.13	[]	15	22	11	14	13	0	10	12	7	0	0	0
306	Heat shock protein 105 kDa OS=Mus musculus OX=10090 GN=Hsph1 PE=1 SV=2	Q61699	Hsph1	96 kDa	TRUE	0.0015	1_4T1_cell high, 4T1_MV low, 4T1_sEV low	21	22	36	0	0	0	10	4	0	3	3	3
307	40S ribosomal protein S7 OS=Mus musculus OX=10090 GN=Rps7 PE=2 SV=1	P62082	Rps7	22 kDa		< 0.00010	1_4T1_cell high, 4T1_MV low, 4T1_sEV low	22	26	30	0	1	0	8	6	3	2	4	1
308	Farnesyl pyrophosphate synthase OS=Mus musculus OX=10090 GN=Fdps PE=1 SV=1	Q920E5	Fdps	41 kDa		< 0.00010	1_4T1_cell high, 4T1_MV low, 4T1_sEV low	26	25	28	0	0	0	9	7	3	3	3	3
309	Serine--tRNA ligase, cytoplasmic OS=Mus musculus OX=10090 GN=Sars1 PE=1 SV=3	P26638	Sars1	58 kDa		0.023	1_4T1_cell high, 4T1_MV low, 4T1_sEV low	23	24	26	0	0	0	8	8	2	2	1	11
310	Serine hydroxymethyltransferase, mitochondrial OS=Mus musculus OX=10090 GN=Shmt2 PE=1 SV=1	Q9CZN7	Shmt2	56 kDa	TRUE	0.00015	1_4T1_cell high, 4T1_MV low, 4T1_sEV low	28	24	30	1	1	1	3	3	0	0	0	3
311	Ras-related protein Ral-B OS=Mus musculus OX=10090 GN=Ralb PE=1 SV=1	Q9JIW9	Ralb	23 kDa	TRUE	0.0074	1_4T1_cell low, 4T1_MV high, 4T1_sEV high	7	7	5	4	4	0	11	9	7	11	12	13
312	Kinesin-like protein KIF23 OS=Mus musculus OX=10090 GN=Kif23 PE=1 SV=1	E9Q5G3	Kif23	109 kDa		0.15	[]	1	2	2	3	3	0	25	40	0	5	10	1
313	Importin-7 OS=Mus musculus OX=10090 GN=Ipo7 PE=1 SV=2	Q9EPL8	Ipo7	119 kDa	TRUE	< 0.00010	1_4T1_cell high, 4T1_MV low, 4T1_sEV low	25	26	30	0	0	0	5	5	1	2	2	3
314	Neutral alpha-glucosidase AB OS=Mus musculus OX=10090 GN=Ganab PE=1 SV=1	Q8BHN3	Ganab	107 kDa		< 0.00010	1_4T1_cell high, 4T1_MV low, 4T1_sEV low	29	27	35	0	0	0	0	4	1	0	0	1
315	Prominin-2 OS=Mus musculus OX=10090 GN=Prom2 PE=1 SV=1	Q3UUY6	Prom2	93 kDa		0.001	1_4T1_cell low, 4T1_MV low, 4T1_sEV high	0	0	0	0	0	0	5	7	5	27	25	40
316	Synaptic vesicle membrane protein VAT-1 homolog OS=Mus musculus OX=10090 GN=Vat1 PE=1 SV=3	Q62465	Vat1	43 kDa		0.004	1_4T1_cell low, 4T1_MV high, 4T1_sEV low	9	8	7	14	13	2	17	12	8	6	5	2
317	Rho GDP-dissociation inhibitor 1 OS=Mus musculus OX=10090 GN=Arhgdia PE=1 SV=3	Q99PT1	Arhgdia	23 kDa		0.0043	1_4T1_cell high, 4T1_MV high, 4T1_sEV low	21	20	22	7	7	1	9	8	3	2	3	0
318	60S acidic ribosomal protein P0 OS=Mus musculus OX=10090 GN=Rplp0 PE=1 SV=3	P14869	Rplp0	34 kDa		< 0.00010	1_4T1_cell high, 4T1_MV low, 4T1_sEV low	23	20	30	0	2	0	5	4	2	4	4	4
319	Actin-related protein 3 OS=Mus musculus OX=10090 GN=Actr3 PE=1 SV=3	Q99JY9	Actr3	47 kDa		0.0002	1_4T1_cell low, 4T1_MV high, 4T1_sEV low	18	18	17	0	0	1	15	19	11	2	3	2
320	Ras-related protein Rab-14 OS=Mus musculus OX=10090 GN=Rab14 PE=1 SV=3	Q91V41	Rab14	24 kDa	TRUE	< 0.00010	1_4T1_cell low, 4T1_MV high, 4T1_sEV low	12	12	15	0	0	0	19	13	9	8	11	9
321	Pre-mRNA-processing-splicing factor 8 OS=Mus musculus OX=10090 GN=Prpf8 PE=1 SV=2	Q99PV0	Prpf8	274 kDa		0.0031	1_4T1_cell high, 4T1_MV low, 4T1_sEV high	11	17	37	0	0	0	0	0	0	5	7	6
322	Destrin OS=Mus musculus OX=10090 GN=Dstn PE=1 SV=3	Q9R0P5	Dstn	19 kDa	TRUE	0.00088	1_4T1_cell high, 4T1_MV high, 4T1_sEV low	14	16	21	1	1	1	16	15	6	1	2	5
323	Coatomer subunit gamma-1 OS=Mus musculus OX=10090 GN=Copg1 PE=1 SV=1	Q9QZE5	Copg1	98 kDa	TRUE	< 0.00010	1_4T1_cell high, 4T1_MV low, 4T1_sEV low	31	32	29	0	0	0	2	2	0	2	1	3
324	Monofunctional C1-tetrahydrofolate synthase, mitochondrial OS=Mus musculus OX=10090 GN=Mthfd1l PE=1 SV=2	Q3V3R1	Mthfd1l	106 kDa	TRUE	< 0.00010	1_4T1_cell high, 4T1_MV low, 4T1_sEV low	28	35	36	0	1	0	0	2	0	0	0	0
325	40S ribosomal protein S8 OS=Mus musculus OX=10090 GN=Rps8 PE=1 SV=2	P62242	Rps8	24 kDa		0.00019	1_4T1_cell high, 4T1_MV low, 4T1_sEV high	14	12	26	0	1	0	7	5	2	12	11	9
326	Eukaryotic translation initiation factor 3 subunit C OS=Mus musculus OX=10090 GN=Eif3c PE=1 SV=1	Q8R1B4	Eif3c	106 kDa		0.00034	1_4T1_cell high, 4T1_MV low, 4T1_sEV low	22	28	27	0	0	0	5	6	1	5	4	8
327	Coatomer subunit alpha OS=Mus musculus OX=10090 GN=Copa PE=1 SV=2	Q8CIE6	Copa	138 kDa		0.0033	1_4T1_cell high, 4T1_MV low, 4T1_sEV low	24	22	29	0	0	0	2	4	0	1	0	8
328	U5 small nuclear ribonucleoprotein 200 kDa helicase OS=Mus musculus OX=10090 GN=Snrnp200 PE=1 SV=1	Q6P4T2	Snrnp200	245 kDa		0.074	[]	15	19	44	0	0	0	0	0	0	2	1	15
329	DnaJ homolog subfamily A member 2 OS=Mus musculus OX=10090 GN=Dnaja2 PE=1 SV=1	Q9QYJ0	Dnaja2	46 kDa		0.059	[]	13	13	13	2	2	0	9	7	0	9	12	6
330	RuvB-like 1 OS=Mus musculus OX=10090 GN=Ruvbl1 PE=1 SV=1	P60122	Ruvbl1	50 kDa		0.0042	1_4T1_cell high, 4T1_MV low, 4T1_sEV low	22	21	23	0	0	0	7	9	0	6	6	8
331	Vigilin OS=Mus musculus OX=10090 GN=Hdlbp PE=1 SV=1	Q8VDJ3	Hdlbp	142 kDa		< 0.00010	1_4T1_cell high, 4T1_MV low, 4T1_sEV low	26	25	39	0	0	0	0	1	0	0	0	0
332	AP-1 complex subunit beta-1 OS=Mus musculus OX=10090 GN=Ap1b1 PE=1 SV=2	O35643	Ap1b1	104 kDa	TRUE	< 0.00010	1_4T1_cell high, 4T1_MV low, 4T1_sEV low	23	26	23	0	0	0	0	3	0	0	0	0
333	Glucose-6-phosphate 1-dehydrogenase X OS=Mus musculus OX=10090 GN=G6pdx PE=1 SV=3	Q00612	G6pdx	59 kDa		0.00013	1_4T1_cell high, 4T1_MV low, 4T1_sEV low	19	20	19	0	0	0	4	6	1	1	1	3
334	H-2 class I histocompatibility antigen, D-D alpha chain OS=Mus musculus OX=10090 GN=H2-D1 PE=1 SV=1	P01900	H2-D1	41 kDa	TRUE	< 0.00010	1_4T1_cell low, 4T1_MV high, 4T1_sEV high	3	3	4	18	17	5	7	5	9	7	8	9
335	Ras-related protein Rab-11B OS=Mus musculus OX=10090 GN=Rab11b PE=1 SV=3	P46638	Rab11b	24 kDa	TRUE	0.012	1_4T1_cell low, 4T1_MV high, 4T1_sEV high	11	14	12	0	1	0	11	10	12	10	10	11
336	Reticulon-4 OS=Mus musculus OX=10090 GN=Rtn4 PE=1 SV=2	Q99P72	Rtn4	127 kDa		0.0002	1_4T1_cell high, 4T1_MV high, 4T1_sEV low	16	17	32	0	0	0	8	9	5	3	3	4
337	Tyrosine-protein kinase Yes OS=Mus musculus OX=10090 GN=Yes1 PE=1 SV=3	Q04736	Yes1	61 kDa	TRUE	0.00057	1_4T1_cell low, 4T1_MV high, 4T1_sEV high	2	3	4	3	6	2	13	11	4	14	17	10
338	Septin-11 OS=Mus musculus OX=10090 GN=Septin11 PE=1 SV=4	Q8C1B7	Septin11	50 kDa	TRUE	< 0.00010	1_4T1_cell high, 4T1_MV high, 4T1_sEV low	19	17	22	1	2	0	13	10	6	3	3	2
339	Importin subunit alpha-1 OS=Mus musculus OX=10090 GN=Kpna2 PE=1 SV=2	P52293	Kpna2	58 kDa		0.0035	1_4T1_cell high, 4T1_MV low, 4T1_sEV low	15	19	33	0	0	0	8	5	0	3	2	0
340	Keratin, type I cytoskeletal 17 OS=Homo sapiens OX=9606 GN=KRT17 PE=1 SV=2	Q04695	KRT17	48 kDa	TRUE	0.11	[]	10	0	0	18	14	0	8	5	0	0	0	0
341	Monocarboxylate transporter 1 OS=Mus musculus OX=10090 GN=Slc16a1 PE=1 SV=1	P53986	Slc16a1	53 kDa		0.22	[]	4	4	7	5	4	2	10	10	21	8	9	11
342	Integrin beta-5 OS=Mus musculus OX=10090 GN=Itgb5 PE=1 SV=2	O70309	Itgb5	88 kDa		0.0021	1_4T1_cell low, 4T1_MV low, 4T1_sEV high	0	1	0	4	9	0	11	9	4	16	22	18
343	Thioredoxin-dependent peroxide reductase, mitochondrial OS=Mus musculus OX=10090 GN=Prdx3 PE=1 SV=1	P20108	Prdx3	28 kDa		< 0.00010	1_4T1_cell high, 4T1_MV low, 4T1_sEV low	8	10	8	22	27	10	3	2	0	0	0	0
344	Heat shock protein 75 kDa, mitochondrial OS=Mus musculus OX=10090 GN=Trap1 PE=1 SV=1	Q9CQN1	Trap1	80 kDa		0.00018	1_4T1_cell high, 4T1_MV low, 4T1_sEV low	20	22	24	0	3	0	5	4	2	0	0	2
345	Hemoglobin subunit beta-1 OS=Mus musculus OX=10090 GN=Hbb-b1 PE=1 SV=2	P02088	Hbb-b1	16 kDa	TRUE	0.44	[]	0	0	0	0	0	53	0	0	0	0	0	0
346	40S ribosomal protein S18 OS=Mus musculus OX=10090 GN=Rps18 PE=1 SV=3	P62270	Rps18	18 kDa		0.023	1_4T1_cell high, 4T1_MV high, 4T1_sEV low	13	14	26	0	4	0	9	9	5	7	6	6
347	Tight junction protein ZO-2 OS=Mus musculus OX=10090 GN=Tjp2 PE=1 SV=2	Q9Z0U1	Tjp2	131 kDa	TRUE	0.068	[]	7	6	20	0	0	1	13	13	3	2	6	3
348	Succinate dehydrogenase [ubiquinone] flavoprotein subunit, mitochondrial OS=Mus musculus OX=10090 GN=Sdha PE=1 SV=1	Q8K2B3	Sdha	73 kDa		0.016	1_4T1_cell high, 4T1_MV low, 4T1_sEV low	18	19	14	10	17	1	1	2	0	0	0	0
349	Fructose-bisphosphate aldolase C OS=Mus musculus OX=10090 GN=Aldoc PE=1 SV=4	P05063	Aldoc	39 kDa	TRUE	0.052	[]	19	20	0	0	0	0	0	0	0	0	0	0
350	GTP-binding nuclear protein Ran OS=Mus musculus OX=10090 GN=Ran PE=1 SV=3	P62827	Ran	24 kDa		0.014	1_4T1_cell high, 4T1_MV low, 4T1_sEV high	15	16	20	0	2	0	6	7	3	6	5	10
351	Cytosol aminopeptidase OS=Mus musculus OX=10090 GN=Lap3 PE=1 SV=3	Q9CPY7	Lap3	56 kDa		0.023	1_4T1_cell high, 4T1_MV low, 4T1_sEV low	16	20	20	6	6	5	4	4	0	0	0	0
352	H-2 class I histocompatibility antigen, K-D alpha chain OS=Mus musculus OX=10090 GN=H2-K1 PE=1 SV=1	P01902	H2-K1	41 kDa	TRUE	0.087	[]	4	3	5	15	11	1	8	7	8	6	9	7
353	Glutathione S-transferase P 1 OS=Mus musculus OX=10090 GN=Gstp1 PE=1 SV=2	P19157	Gstp1	24 kDa		0.0054	1_4T1_cell high, 4T1_MV low, 4T1_sEV low	21	21	18	1	1	1	5	7	1	3	3	2
354	Stomatin OS=Mus musculus OX=10090 GN=Stom PE=1 SV=3	P54116	Stom	31 kDa		0.0017	1_4T1_cell low, 4T1_MV high, 4T1_sEV high	1	1	1	19	25	3	5	6	7	7	6	4
355	40S ribosomal protein S16 OS=Mus musculus OX=10090 GN=Rps16 PE=1 SV=4	P14131	Rps16	16 kDa		0.012	1_4T1_cell high, 4T1_MV low, 4T1_sEV high	12	11	17	0	2	0	7	7	2	5	5	7
356	Kin of IRRE-like protein 1 OS=Mus musculus OX=10090 GN=Kirrel1 PE=1 SV=1	Q80W68	Kirrel1	87 kDa		0.0024	1_4T1_cell low, 4T1_MV low, 4T1_sEV high	0	0	1	11	14	1	3	5	3	19	23	15
357	Pre-mRNA-splicing factor ATP-dependent RNA helicase DHX15 OS=Mus musculus OX=10090 GN=Dhx15 PE=1 SV=2	O35286	Dhx15	91 kDa		0.0018	1_4T1_cell high, 4T1_MV low, 4T1_sEV low	22	21	30	0	0	0	1	3	0	1	2	8
358	Nucleoprotein TPR OS=Mus musculus OX=10090 GN=Tpr PE=1 SV=1	F6ZDS4	Tpr	274 kDa		< 0.00010	1_4T1_cell high, 4T1_MV low, 4T1_sEV low	24	24	37	0	0	0	0	0	0	0	0	0
359	Serine/threonine-protein phosphatase 2A 65 kDa regulatory subunit A beta isoform OS=Mus musculus OX=10090 GN=Ppp2r1b PE=1 SV=2	Q7TNP2	Ppp2r1b	66 kDa	TRUE	< 0.00010	1_4T1_cell high, 4T1_MV low, 4T1_sEV low	20	23	24	0	0	0	0	0	0	0	0	0
360	Afadin OS=Mus musculus OX=10090 GN=Afdn PE=1 SV=3	Q9QZQ1	Afdn	207 kDa		0.25	[]	7	10	15	3	3	1	12	12	2	4	4	5
361	E3 ubiquitin-protein ligase NEDD4 OS=Mus musculus OX=10090 GN=Nedd4 PE=1 SV=3	P46935	Nedd4	103 kDa	TRUE	0.0042	1_4T1_cell high, 4T1_MV low, 4T1_sEV low	22	23	22	0	1	0	4	6	0	6	9	1
362	Aspartate aminotransferase, cytoplasmic OS=Mus musculus OX=10090 GN=Got1 PE=1 SV=3	P05201	Got1	46 kDa		0.15	[]	14	14	19	9	11	0	6	13	3	1	0	0
363	Aspartate--tRNA ligase, cytoplasmic OS=Mus musculus OX=10090 GN=Dars1 PE=1 SV=2	Q922B2	Dars1	57 kDa		0.1	[]	16	16	19	0	0	0	5	5	1	5	4	16
364	AP-2 complex subunit alpha-1 OS=Mus musculus OX=10090 GN=Ap2a1 PE=1 SV=1	P17426	Ap2a1	108 kDa	TRUE	0.06	[]	9	13	10	0	0	0	10	10	0	9	9	4
365	GMP synthase [glutamine-hydrolyzing] OS=Mus musculus OX=10090 GN=Gmps PE=1 SV=2	Q3THK7	Gmps	77 kDa		< 0.00010	1_4T1_cell high, 4T1_MV low, 4T1_sEV low	27	26	29	0	0	0	1	2	0	1	1	5
366	Lamin-B1 OS=Mus musculus OX=10090 GN=Lmnb1 PE=1 SV=3	P14733	Lmnb1	67 kDa	TRUE	< 0.00010	1_4T1_cell high, 4T1_MV low, 4T1_sEV low	24	25	34	0	0	0	0	1	0	0	0	0
367	DNA replication licensing factor MCM6 OS=Mus musculus OX=10090 GN=Mcm6 PE=1 SV=1	P97311	Mcm6	93 kDa		< 0.00010	1_4T1_cell high, 4T1_MV low, 4T1_sEV low	20	24	35	0	0	0	0	0	0	0	0	0
368	26S proteasome non-ATPase regulatory subunit 11 OS=Mus musculus OX=10090 GN=Psmd11 PE=1 SV=3	Q8BG32	Psmd11	47 kDa		0.0012	1_4T1_cell high, 4T1_MV low, 4T1_sEV low	22	17	22	0	0	0	6	6	0	5	3	3
369	Leucine--tRNA ligase, cytoplasmic OS=Mus musculus OX=10090 GN=Lars1 PE=1 SV=2	Q8BMJ2	Lars1	134 kDa		0.0017	1_4T1_cell high, 4T1_MV low, 4T1_sEV low	22	24	24	0	0	0	4	4	0	2	1	7
370	Insulin-degrading enzyme OS=Mus musculus OX=10090 GN=Ide PE=1 SV=1	Q9JHR7	Ide	118 kDa		< 0.00010	1_4T1_cell high, 4T1_MV low, 4T1_sEV low	17	18	29	0	0	0	4	5	2	0	0	1
371	Acetyl-CoA carboxylase 1 OS=Mus musculus OX=10090 GN=Acaca PE=1 SV=1	Q5SWU9	Acaca	265 kDa		0.3	[]	18	20	21	0	0	0	0	0	0	0	0	22
372	Sodium/potassium-transporting ATPase subunit beta-1 OS=Mus musculus OX=10090 GN=Atp1b1 PE=1 SV=1	P14094	Atp1b1	35 kDa		< 0.00010	1_4T1_cell low, 4T1_MV high, 4T1_sEV high	1	1	2	16	20	5	9	5	6	5	3	7
373	Cadherin-1 OS=Mus musculus OX=10090 GN=Cdh1 PE=1 SV=1	P09803	Cdh1	98 kDa		0.00069	1_4T1_cell low, 4T1_MV low, 4T1_sEV high	3	1	1	0	1	0	7	8	8	17	18	23
374	Asparagine synthetase [glutamine-hydrolyzing] OS=Mus musculus OX=10090 GN=Asns PE=1 SV=3	Q61024	Asns	64 kDa		0.013	1_4T1_cell high, 4T1_MV low, 4T1_sEV high	18	18	16	0	0	0	5	5	1	4	5	10
375	Heterogeneous nuclear ribonucleoprotein F OS=Mus musculus OX=10090 GN=Hnrnpf PE=1 SV=3	Q9Z2X1	Hnrnpf	46 kDa	TRUE	< 0.00010	1_4T1_cell high, 4T1_MV low, 4T1_sEV low	24	18	28	0	0	0	3	3	0	4	4	1
376	Hypoxia up-regulated protein 1 OS=Mus musculus OX=10090 GN=Hyou1 PE=1 SV=1	Q9JKR6	Hyou1	111 kDa		< 0.00010	1_4T1_cell high, 4T1_MV low, 4T1_sEV low	27	31	27	0	0	0	0	2	0	0	0	0
377	Eukaryotic translation initiation factor 2 subunit 3, X-linked OS=Mus musculus OX=10090 GN=Eif2s3x PE=1 SV=2	Q9Z0N1	Eif2s3x	51 kDa		< 0.00010	1_4T1_cell high, 4T1_MV low, 4T1_sEV low	21	24	26	1	1	0	3	4	0	1	0	3
378	NEDD4-like E3 ubiquitin-protein ligase WWP2 OS=Mus musculus OX=10090 GN=Wwp2 PE=1 SV=1	Q9DBH0	Wwp2	99 kDa	TRUE	0.00038	1_4T1_cell low, 4T1_MV low, 4T1_sEV high	0	0	1	0	0	0	4	7	9	17	22	18
379	Trifunctional enzyme subunit alpha, mitochondrial OS=Mus musculus OX=10090 GN=Hadha PE=1 SV=1	Q8BMS1	Hadha	83 kDa		< 0.00010	1_4T1_cell high, 4T1_MV low, 4T1_sEV low	31	31	25	1	0	0	0	3	0	0	0	0
380	DNA replication licensing factor MCM3 OS=Mus musculus OX=10090 GN=Mcm3 PE=1 SV=2	P25206	Mcm3	92 kDa		< 0.00010	1_4T1_cell high, 4T1_MV low, 4T1_sEV low	27	31	28	0	0	0	0	0	0	0	0	0
381	Ferritin light chain 1 OS=Mus musculus OX=10090 GN=Ftl1 PE=1 SV=2	P29391	Ftl1	21 kDa		0.17	[]	10	11	2	14	16	0	4	4	2	6	3	6
382	Eukaryotic translation initiation factor 3 subunit B OS=Mus musculus OX=10090 GN=Eif3b PE=1 SV=1	Q8JZQ9	Eif3b	91 kDa		0.0015	1_4T1_cell high, 4T1_MV low, 4T1_sEV low	17	18	35	0	0	0	4	4	0	2	3	5
383	Inorganic pyrophosphatase OS=Mus musculus OX=10090 GN=Ppa1 PE=1 SV=1	Q9D819	Ppa1	33 kDa		< 0.00010	1_4T1_cell high, 4T1_MV low, 4T1_sEV low	17	16	25	0	0	0	5	4	3	0	0	2
384	Actin-related protein 2/3 complex subunit 2 OS=Mus musculus OX=10090 GN=Arpc2 PE=1 SV=3	Q9CVB6	Arpc2	34 kDa		< 0.00010	1_4T1_cell high, 4T1_MV high, 4T1_sEV low	13	14	15	0	0	0	13	12	9	0	0	2
385	Lymphocyte antigen 75 OS=Mus musculus OX=10090 GN=Ly75 PE=1 SV=2	Q60767	Ly75	197 kDa		0.032	1_4T1_cell low, 4T1_MV high, 4T1_sEV high	1	1	2	9	7	1	7	6	4	7	15	5
386	Y-box-binding protein 1 OS=Mus musculus OX=10090 GN=Ybx1 PE=1 SV=3	P62960	Ybx1	36 kDa	TRUE	0.0019	1_4T1_cell high, 4T1_MV low, 4T1_sEV low	17	16	32	0	1	0	4	2	0	4	5	7
387	Methionine--tRNA ligase, cytoplasmic OS=Mus musculus OX=10090 GN=Mars1 PE=1 SV=1	Q68FL6	Mars1	101 kDa		0.0028	1_4T1_cell high, 4T1_MV low, 4T1_sEV low	19	23	26	0	0	0	2	3	0	1	2	8
388	Ribonuclease inhibitor OS=Mus musculus OX=10090 GN=Rnh1 PE=1 SV=1	Q91VI7	Rnh1	50 kDa		0.00015	1_4T1_cell high, 4T1_MV low, 4T1_sEV low	25	27	25	0	0	0	6	7	0	1	1	0
389	Asparagine--tRNA ligase, cytoplasmic OS=Mus musculus OX=10090 GN=NARS1 PE=1 SV=2	Q8BP47	NARS1	64 kDa		0.011	1_4T1_cell high, 4T1_MV low, 4T1_sEV low	21	22	23	0	0	0	4	5	0	0	1	8
390	ATP-dependent RNA helicase DDX1 OS=Mus musculus OX=10090 GN=Ddx1 PE=1 SV=1	Q91VR5	Ddx1	83 kDa		< 0.00010	1_4T1_cell high, 4T1_MV low, 4T1_sEV low	24	28	31	0	0	0	0	2	0	0	1	0
391	1-phosphatidylinositol 4,5-bisphosphate phosphodiesterase beta-3 OS=Mus musculus OX=10090 GN=Plcb3 PE=1 SV=2	P51432	Plcb3	139 kDa		0.11	[]	15	14	15	1	0	1	7	8	10	4	5	4
392	Glutathione reductase, mitochondrial OS=Mus musculus OX=10090 GN=Gsr PE=1 SV=3	P47791	Gsr	54 kDa		0.004	1_4T1_cell high, 4T1_MV low, 4T1_sEV low	17	14	11	16	17	2	4	7	1	1	1	1
393	Thioredoxin reductase 1, cytoplasmic OS=Mus musculus OX=10090 GN=Txnrd1 PE=1 SV=3	Q9JMH6	Txnrd1	67 kDa	TRUE	0.018	1_4T1_cell high, 4T1_MV high, 4T1_sEV low	12	16	17	7	12	1	5	7	2	1	1	1
394	Ras-related protein Rab-5C OS=Mus musculus OX=10090 GN=Rab5c PE=1 SV=2	P35278	Rab5c	23 kDa	TRUE	0.00071	1_4T1_cell low, 4T1_MV high, 4T1_sEV high	8	9	10	0	0	0	11	9	9	10	11	11
395	Ras-related protein Rab-8A OS=Mus musculus OX=10090 GN=Rab8a PE=1 SV=2	P55258	Rab8a	24 kDa	TRUE	0.0077	1_4T1_cell low, 4T1_MV high, 4T1_sEV high	5	6	7	0	0	0	8	7	6	7	9	14
396	Eukaryotic translation initiation factor 2 subunit 1 OS=Mus musculus OX=10090 GN=Eif2s1 PE=1 SV=3	Q6ZWX6	Eif2s1	36 kDa		< 0.00010	1_4T1_cell high, 4T1_MV low, 4T1_sEV low	22	24	24	0	1	0	4	2	0	1	1	2
397	Dolichyl-diphosphooligosaccharide--protein glycosyltransferase subunit 1 OS=Mus musculus OX=10090 GN=Rpn1 PE=1 SV=1	Q91YQ5	Rpn1	69 kDa		< 0.00010	1_4T1_cell high, 4T1_MV high, 4T1_sEV low	21	23	26	0	0	0	7	9	2	0	0	0
398	Prolow-density lipoprotein receptor-related protein 1 OS=Mus musculus OX=10090 GN=Lrp1 PE=1 SV=1	Q91ZX7	Lrp1	505 kDa	TRUE	0.065	[]	0	0	0	26	34	0	0	0	0	2	2	8
399	AP-2 complex subunit alpha-2 OS=Mus musculus OX=10090 GN=Ap2a2 PE=1 SV=2	P17427	Ap2a2	104 kDa	TRUE	0.072	[]	9	9	12	1	1	0	9	11	2	9	10	2
400	Annexin A7 OS=Mus musculus OX=10090 GN=Anxa7 PE=1 SV=2	Q07076	Anxa7	50 kDa		0.027	1_4T1_cell low, 4T1_MV high, 4T1_sEV high	11	11	14	0	0	0	9	8	11	7	9	11
401	Dedicator of cytokinesis protein 9 OS=Mus musculus OX=10090 GN=Dock9 PE=1 SV=2	Q8BIK4	Dock9	235 kDa		0.00048	1_4T1_cell low, 4T1_MV low, 4T1_sEV high	1	1	5	0	0	0	11	9	4	20	20	8
402	Splicing factor 3B subunit 1 OS=Mus musculus OX=10090 GN=Sf3b1 PE=1 SV=1	Q99NB9	Sf3b1	146 kDa		0.0041	1_4T1_cell high, 4T1_MV low, 4T1_sEV low	11	17	34	0	0	0	0	1	0	4	3	6
403	Tetraspanin-14 OS=Mus musculus OX=10090 GN=Tspan14 PE=1 SV=1	Q8QZY6	Tspan14	31 kDa		< 0.00010	1_4T1_cell low, 4T1_MV low, 4T1_sEV high	0	0	0	0	0	1	3	4	4	28	27	20
404	Peroxiredoxin-5, mitochondrial OS=Mus musculus OX=10090 GN=Prdx5 PE=1 SV=2	P99029	Prdx5	22 kDa		0.00013	1_4T1_cell high, 4T1_MV high, 4T1_sEV low	13	14	14	9	13	5	5	5	2	0	0	1
405	40S ribosomal protein S5 OS=Mus musculus OX=10090 GN=Rps5 PE=1 SV=3	P97461	Rps5	23 kDa		0.0056	1_4T1_cell high, 4T1_MV low, 4T1_sEV low	15	14	31	0	0	0	8	6	2	3	3	6
406	E3 ubiquitin-protein ligase Itchy OS=Mus musculus OX=10090 GN=Itch PE=1 SV=2	Q8C863	Itch	99 kDa	TRUE	< 0.00010	1_4T1_cell low, 4T1_MV low, 4T1_sEV high	1	1	1	0	0	0	3	7	4	18	22	15
407	Adenylosuccinate synthetase isozyme 2 OS=Mus musculus OX=10090 GN=Adss2 PE=1 SV=2	P46664	Adss2	50 kDa	TRUE	0.0028	1_4T1_cell high, 4T1_MV low, 4T1_sEV low	25	28	17	0	0	0	7	7	0	2	1	0
408	Calpain-2 catalytic subunit OS=Mus musculus OX=10090 GN=Capn2 PE=1 SV=4	O08529	Capn2	80 kDa		< 0.00010	1_4T1_cell high, 4T1_MV low, 4T1_sEV low	20	21	29	0	0	0	5	6	0	0	1	1
409	Voltage-dependent anion-selective channel protein 3 OS=Mus musculus OX=10090 GN=Vdac3 PE=1 SV=1	Q60931	Vdac3	31 kDa		0.0067	1_4T1_cell high, 4T1_MV high, 4T1_sEV low	5	3	19	17	16	11	3	4	8	0	0	0
410	Sarcoplasmic/endoplasmic reticulum calcium ATPase 2 OS=Mus musculus OX=10090 GN=Atp2a2 PE=1 SV=2	O55143	Atp2a2	115 kDa		< 0.00010	1_4T1_cell high, 4T1_MV low, 4T1_sEV low	20	22	30	3	2	1	2	1	0	0	0	0
411	IST1 homolog OS=Mus musculus OX=10090 GN=Ist1 PE=1 SV=1	Q9CX00	Ist1	39 kDa		0.00087	1_4T1_cell low, 4T1_MV low, 4T1_sEV high	4	5	5	0	0	0	5	6	6	13	13	17
412	DNA topoisomerase 1 OS=Mus musculus OX=10090 GN=Top1 PE=1 SV=2	Q04750	Top1	91 kDa		0.00071	1_4T1_cell low, 4T1_MV low, 4T1_sEV high	4	3	13	0	0	0	1	1	0	12	12	17
413	Proliferating cell nuclear antigen OS=Mus musculus OX=10090 GN=Pcna PE=1 SV=2	P17918	Pcna	29 kDa		< 0.00010	1_4T1_cell high, 4T1_MV low, 4T1_sEV low	19	18	21	0	0	0	3	4	0	1	2	1
414	Heterogeneous nuclear ribonucleoprotein H OS=Mus musculus OX=10090 GN=Hnrnph1 PE=1 SV=3	O35737	Hnrnph1	49 kDa	TRUE	0.0015	1_4T1_cell high, 4T1_MV low, 4T1_sEV low	18	18	30	0	1	0	5	4	0	5	4	0
415	2-oxoglutarate dehydrogenase, mitochondrial OS=Mus musculus OX=10090 GN=Ogdh PE=1 SV=3	Q60597	Ogdh	116 kDa		0.095	[]	18	15	16	2	3	4	0	0	0	0	0	0
416	Peroxiredoxin-4 OS=Mus musculus OX=10090 GN=Prdx4 PE=1 SV=1	O08807	Prdx4	31 kDa	TRUE	0.00034	1_4T1_cell high, 4T1_MV low, 4T1_sEV low	12	10	14	10	13	6	0	0	0	0	0	0
417	Lysosome-associated membrane glycoprotein 1 OS=Mus musculus OX=10090 GN=Lamp1 PE=1 SV=2	P11438	Lamp1	44 kDa		< 0.00010	1_4T1_cell low, 4T1_MV low, 4T1_sEV high	5	5	2	17	21	6	4	4	1	7	9	6
418	Inactive tyrosine-protein kinase 7 OS=Mus musculus OX=10090 GN=Ptk7 PE=1 SV=1	Q8BKG3	Ptk7	118 kDa		0.00028	1_4T1_cell low, 4T1_MV low, 4T1_sEV high	3	1	2	4	4	0	7	6	5	19	20	12
419	26S proteasome regulatory subunit 6A OS=Mus musculus OX=10090 GN=Psmc3 PE=1 SV=2	O88685	Psmc3	50 kDa		0.00019	1_4T1_cell high, 4T1_MV low, 4T1_sEV low	19	24	19	1	1	0	3	2	0	3	3	4
420	CYFIP-related Rac1 interactor B OS=Mus musculus OX=10090 GN=Cyrib PE=1 SV=1	Q921M7	Cyrib	37 kDa		0.00035	1_4T1_cell high, 4T1_MV high, 4T1_sEV low	15	15	17	0	0	0	7	7	6	3	4	4
421	CTP synthase 1 OS=Mus musculus OX=10090 GN=Ctps1 PE=1 SV=2	P70698	Ctps1	67 kDa	TRUE	0.061	[]	18	16	27	0	0	0	6	4	0	1	0	10
422	Histidine--tRNA ligase, cytoplasmic OS=Mus musculus OX=10090 GN=Hars1 PE=1 SV=2	Q61035	Hars1	57 kDa	TRUE	0.068	[]	18	19	16	5	8	0	6	7	1	0	0	0
423	6-phosphogluconolactonase OS=Mus musculus OX=10090 GN=Pgls PE=1 SV=1	Q9CQ60	Pgls	27 kDa		0.00027	1_4T1_cell high, 4T1_MV low, 4T1_sEV low	26	26	20	0	0	0	4	5	0	1	2	0
424	Dynamin-1-like protein OS=Mus musculus OX=10090 GN=Dnm1l PE=1 SV=2	Q8K1M6	Dnm1l	83 kDa		0.00015	1_4T1_cell high, 4T1_MV low, 4T1_sEV low	25	25	18	0	0	0	2	3	0	1	1	0
425	Tripeptidyl-peptidase 2 OS=Mus musculus OX=10090 GN=Tpp2 PE=1 SV=3	Q64514	Tpp2	140 kDa		< 0.00010	1_4T1_cell high, 4T1_MV low, 4T1_sEV low	18	20	33	0	0	0	2	2	0	0	0	0
426	Copine-3 OS=Mus musculus OX=10090 GN=Cpne3 PE=1 SV=2	Q8BT60	Cpne3	60 kDa	TRUE	0.067	[]	8	10	11	3	2	1	7	9	3	7	7	6
427	Acid ceramidase OS=Mus musculus OX=10090 GN=Asah1 PE=1 SV=1	Q9WV54	Asah1	45 kDa		< 0.00010	1_4T1_cell high, 4T1_MV low, 4T1_sEV low	8	7	6	21	24	5	1	2	0	1	1	1
428	Glutathione S-transferase omega-1 OS=Mus musculus OX=10090 GN=Gsto1 PE=1 SV=2	O09131	Gsto1	27 kDa		0.014	1_4T1_cell high, 4T1_MV low, 4T1_sEV low	13	15	21	0	0	1	5	4	2	1	2	3
429	Serpin H1 OS=Mus musculus OX=10090 GN=Serpinh1 PE=1 SV=3	P19324	Serpinh1	47 kDa		0.00023	1_4T1_cell high, 4T1_MV low, 4T1_sEV low	21	20	29	0	0	0	2	7	0	2	3	1
430	Beta-glucuronidase OS=Mus musculus OX=10090 GN=Gusb PE=1 SV=2	P12265	Gusb	74 kDa		0.054	[]	1	1	1	26	29	0	0	1	0	0	0	0
431	DNA replication licensing factor MCM4 OS=Mus musculus OX=10090 GN=Mcm4 PE=1 SV=1	P49717	Mcm4	97 kDa		< 0.00010	1_4T1_cell high, 4T1_MV low, 4T1_sEV low	26	27	30	0	0	0	0	0	0	0	0	0
432	Tight junction protein ZO-1 OS=Mus musculus OX=10090 GN=Tjp1 PE=1 SV=2	P39447	Tjp1	195 kDa	TRUE	0.054	[]	7	4	14	2	2	1	13	17	3	6	4	3
433	Malate dehydrogenase, cytoplasmic OS=Mus musculus OX=10090 GN=Mdh1 PE=1 SV=3	P14152	Mdh1	37 kDa		0.0092	1_4T1_cell high, 4T1_MV high, 4T1_sEV low	15	17	13	8	10	1	6	6	2	0	1	1
434	Serpin B6 OS=Mus musculus OX=10090 GN=Serpinb6 PE=1 SV=1	Q60854	Serpinb6	43 kDa		0.051	[]	17	21	5	4	6	1	4	5	3	1	0	2
435	Elongation factor 1-delta OS=Mus musculus OX=10090 GN=Eef1d PE=1 SV=3	P57776	Eef1d	31 kDa	TRUE	< 0.00010	1_4T1_cell high, 4T1_MV low, 4T1_sEV low	20	20	22	1	1	0	3	3	1	1	1	4
436	Obg-like ATPase 1 OS=Mus musculus OX=10090 GN=Ola1 PE=1 SV=1	Q9CZ30	Ola1	45 kDa		< 0.00010	1_4T1_cell high, 4T1_MV low, 4T1_sEV low	15	16	18	0	0	0	5	6	2	4	2	2
437	Dihydropyrimidinase-related protein 2 OS=Mus musculus OX=10090 GN=Dpysl2 PE=1 SV=2	O08553	Dpysl2	62 kDa	TRUE	0.002	1_4T1_cell high, 4T1_MV low, 4T1_sEV low	19	18	19	0	0	0	6	6	1	1	1	5
438	Myosin light polypeptide 6 OS=Mus musculus OX=10090 GN=Myl6 PE=1 SV=3	Q60605	Myl6	17 kDa		0.26	[]	13	16	10	0	2	3	9	13	6	2	2	1
439	Heterogeneous nuclear ribonucleoproteins A2/B1 OS=Mus musculus OX=10090 GN=Hnrnpa2b1 PE=1 SV=2	O88569	Hnrnpa2b1	37 kDa	TRUE	0.034	1_4T1_cell high, 4T1_MV low, 4T1_sEV low	12	14	47	0	2	0	1	2	0	2	3	1
440	ATP-dependent RNA helicase DDX39A OS=Mus musculus OX=10090 GN=Ddx39a PE=1 SV=1	Q8VDW0	Ddx39a	49 kDa	TRUE	< 0.00010	1_4T1_cell high, 4T1_MV low, 4T1_sEV low	18	21	24	0	0	0	0	3	0	0	0	3
441	Dihydrolipoyl dehydrogenase, mitochondrial OS=Mus musculus OX=10090 GN=Dld PE=1 SV=2	O08749	Dld	54 kDa		0.026	1_4T1_cell high, 4T1_MV low, 4T1_sEV low	10	13	11	10	10	9	2	3	0	0	0	0
442	Probable ATP-dependent RNA helicase DDX17 OS=Mus musculus OX=10090 GN=Ddx17 PE=1 SV=1	Q501J6	Ddx17	72 kDa	TRUE	0.00055	1_4T1_cell high, 4T1_MV low, 4T1_sEV low	17	18	27	0	0	0	3	3	0	2	3	6
443	DNA topoisomerase 2-alpha OS=Mus musculus OX=10090 GN=Top2a PE=1 SV=2	Q01320	Top2a	173 kDa	TRUE	0.48	[]	0	0	52	0	0	0	1	0	0	5	7	2
444	DNA replication licensing factor MCM2 OS=Mus musculus OX=10090 GN=Mcm2 PE=1 SV=3	P97310	Mcm2	102 kDa		< 0.00010	1_4T1_cell high, 4T1_MV low, 4T1_sEV low	27	29	22	0	0	0	0	0	0	1	0	1
445	Proteasome subunit alpha type-7 OS=Mus musculus OX=10090 GN=Psma7 PE=1 SV=1	Q9Z2U0	Psma7	28 kDa		0.0063	1_4T1_cell high, 4T1_MV high, 4T1_sEV low	14	14	11	4	4	1	6	6	1	2	1	1
446	Epidermal growth factor receptor kinase substrate 8-like protein 2 OS=Mus musculus OX=10090 GN=Eps8l2 PE=1 SV=1	Q99K30	Eps8l2	82 kDa		0.077	[]	10	13	16	0	0	0	7	10	1	2	4	8
447	60S ribosomal protein L9 OS=Mus musculus OX=10090 GN=Rpl9 PE=2 SV=2	P51410	Rpl9	22 kDa		< 0.00010	1_4T1_cell high, 4T1_MV low, 4T1_sEV low	17	21	30	0	0	0	4	3	0	2	3	2
448	Protein disulfide-isomerase A4 OS=Mus musculus OX=10090 GN=Pdia4 PE=1 SV=3	P08003	Pdia4	72 kDa		< 0.00010	1_4T1_cell high, 4T1_MV low, 4T1_sEV low	19	21	18	1	2	0	0	1	0	0	0	0
449	Protein transport protein Sec31A OS=Mus musculus OX=10090 GN=Sec31a PE=1 SV=2	Q3UPL0	Sec31a	134 kDa	TRUE	< 0.00010	1_4T1_cell high, 4T1_MV low, 4T1_sEV low	15	19	30	0	0	0	0	0	0	0	0	1
450	Serotransferrin OS=Mus musculus OX=10090 GN=Tf PE=1 SV=1	Q921I1	Tf	77 kDa	TRUE	0.44	[]	0	0	0	0	0	64	0	0	0	1	0	0
451	Protein kinase C and casein kinase substrate in neurons protein 2 OS=Mus musculus OX=10090 GN=Pacsin2 PE=1 SV=1	Q9WVE8	Pacsin2	56 kDa		0.19	[]	6	6	6	1	1	2	7	9	8	9	9	5
452	Aldo-keto reductase family 1 member B1 OS=Mus musculus OX=10090 GN=Akr1b1 PE=1 SV=3	P45376	Akr1b1	36 kDa		0.0047	1_4T1_cell high, 4T1_MV low, 4T1_sEV low	12	12	16	4	6	1	2	4	1	1	2	4
453	H-2 class I histocompatibility antigen, L-D alpha chain OS=Mus musculus OX=10090 GN=H2-L PE=1 SV=2	P01897	H2-L	41 kDa	TRUE	0.22	[]	3	4	4	11	11	0	5	6	5	7	7	8
454	Integrin alpha-5 OS=Mus musculus OX=10090 GN=Itga5 PE=1 SV=3	P11688	Itga5	115 kDa		0.12	[]	0	1	0	6	7	1	6	4	12	9	11	12
455	Macrophage-capping protein OS=Mus musculus OX=10090 GN=Capg PE=1 SV=2	P24452	Capg	39 kDa		0.00057	1_4T1_cell high, 4T1_MV high, 4T1_sEV low	14	15	13	0	1	0	4	8	3	2	2	1
456	Unconventional myosin-Ib OS=Mus musculus OX=10090 GN=Myo1b PE=1 SV=3	P46735	Myo1b	129 kDa	TRUE	0.028	1_4T1_cell low, 4T1_MV high, 4T1_sEV low	0	1	3	1	1	0	26	25	2	2	6	3
457	Plakophilin-3 OS=Mus musculus OX=10090 GN=Pkp3 PE=1 SV=2	Q9QY23	Pkp3	87 kDa		< 0.00010	1_4T1_cell low, 4T1_MV low, 4T1_sEV high	6	4	4	0	0	0	8	6	2	11	10	9
458	Nucleosome assembly protein 1-like 1 OS=Mus musculus OX=10090 GN=Nap1l1 PE=1 SV=2	P28656	Nap1l1	45 kDa	TRUE	< 0.00010	1_4T1_cell high, 4T1_MV high, 4T1_sEV low	16	18	16	0	0	0	7	8	4	1	1	3
459	Spliceosome RNA helicase Ddx39b OS=Mus musculus OX=10090 GN=Ddx39b PE=1 SV=1	Q9Z1N5	Ddx39b	49 kDa	TRUE	< 0.00010	1_4T1_cell high, 4T1_MV low, 4T1_sEV low	15	20	27	0	1	0	2	2	0	1	1	2
460	Puromycin-sensitive aminopeptidase OS=Mus musculus OX=10090 GN=Npepps PE=1 SV=2	Q11011	Npepps	103 kDa		0.0001	1_4T1_cell high, 4T1_MV low, 4T1_sEV low	15	21	23	0	0	0	7	6	1	0	1	1
461	Proteasome adapter and scaffold protein ECM29 OS=Mus musculus OX=10090 GN=Ecpas PE=1 SV=3	Q6PDI5	Ecpas	204 kDa		< 0.00010	1_4T1_cell high, 4T1_MV low, 4T1_sEV low	21	28	29	0	0	0	0	1	0	0	0	1
462	Isocitrate dehydrogenase [NADP], mitochondrial OS=Mus musculus OX=10090 GN=Idh2 PE=1 SV=3	P54071	Idh2	51 kDa	TRUE	0.00053	1_4T1_cell high, 4T1_MV low, 4T1_sEV low	18	20	18	0	0	0	4	7	0	0	0	0
463	Delta-1-pyrroline-5-carboxylate synthase OS=Mus musculus OX=10090 GN=Aldh18a1 PE=1 SV=2	Q9Z110	Aldh18a1	87 kDa		< 0.00010	1_4T1_cell high, 4T1_MV low, 4T1_sEV low	23	27	23	0	1	0	0	0	0	1	0	0
464	E3 SUMO-protein ligase RanBP2 OS=Mus musculus OX=10090 GN=Ranbp2 PE=1 SV=2	Q9ERU9	Ranbp2	341 kDa	TRUE	< 0.00010	1_4T1_cell high, 4T1_MV low, 4T1_sEV low	14	19	33	0	0	0	0	0	0	0	0	0
465	Staphylococcal nuclease domain-containing protein 1 OS=Mus musculus OX=10090 GN=Snd1 PE=1 SV=1	Q78PY7	Snd1	102 kDa		< 0.00010	1_4T1_cell high, 4T1_MV low, 4T1_sEV low	22	20	26	0	0	0	0	0	0	0	0	0
466	Fermitin family homolog 1 OS=Mus musculus OX=10090 GN=Fermt1 PE=1 SV=4	P59113	Fermt1	77 kDa	TRUE	0.002	1_4T1_cell low, 4T1_MV low, 4T1_sEV high	1	2	1	5	4	0	6	8	2	13	18	11
467	Choline transporter-like protein 1 OS=Mus musculus OX=10090 GN=Slc44a1 PE=1 SV=3	Q6X893	Slc44a1	73 kDa		0.1	[]	2	2	1	9	12	0	5	5	6	13	12	11
468	Serine/threonine-protein kinase PAK 2 OS=Mus musculus OX=10090 GN=Pak2 PE=1 SV=1	Q8CIN4	Pak2	58 kDa	TRUE	0.00018	1_4T1_cell high, 4T1_MV low, 4T1_sEV low	21	21	17	0	0	0	5	2	3	2	1	1
469	60S ribosomal protein L10a OS=Mus musculus OX=10090 GN=Rpl10a PE=1 SV=3	P53026	Rpl10a	25 kDa		0.00076	1_4T1_cell high, 4T1_MV low, 4T1_sEV high	10	12	18	0	0	0	5	5	1	11	10	5
470	26S proteasome non-ATPase regulatory subunit 3 OS=Mus musculus OX=10090 GN=Psmd3 PE=1 SV=3	P14685	Psmd3	61 kDa		< 0.00010	1_4T1_cell high, 4T1_MV low, 4T1_sEV low	17	18	20	0	0	0	3	3	0	1	2	2
471	ATP-dependent RNA helicase A OS=Mus musculus OX=10090 GN=Dhx9 PE=1 SV=2	O70133	Dhx9	149 kDa		0.027	1_4T1_cell high, 4T1_MV low, 4T1_sEV low	10	12	36	0	0	0	1	2	0	2	5	6
472	26S proteasome non-ATPase regulatory subunit 1 OS=Mus musculus OX=10090 GN=Psmd1 PE=1 SV=1	Q3TXS7	Psmd1	106 kDa		< 0.00010	1_4T1_cell high, 4T1_MV low, 4T1_sEV low	22	23	21	0	0	0	1	0	0	0	0	3
473	Rab GDP dissociation inhibitor alpha OS=Mus musculus OX=10090 GN=Gdi1 PE=1 SV=3	P50396	Gdi1	51 kDa	TRUE	0.0012	1_4T1_cell high, 4T1_MV low, 4T1_sEV low	13	16	17	0	0	0	0	6	0	0	0	0
474	Phosphatidylethanolamine-binding protein 1 OS=Mus musculus OX=10090 GN=Pebp1 PE=1 SV=3	P70296	Pebp1	21 kDa		0.69	[]	15	16	13	2	0	3	5	4	4	3	3	3
475	CD9 antigen OS=Mus musculus OX=10090 GN=Cd9 PE=1 SV=2	P40240	Cd9	25 kDa		< 0.00010	1_4T1_cell low, 4T1_MV low, 4T1_sEV high	0	1	1	0	0	0	6	7	0	14	19	12
476	Neuropilin-2 OS=Mus musculus OX=10090 GN=Nrp2 PE=1 SV=2	O35375	Nrp2	105 kDa		0.00098	1_4T1_cell low, 4T1_MV low, 4T1_sEV high	0	0	0	2	2	0	5	6	7	15	20	10
477	Heterogeneous nuclear ribonucleoprotein A/B OS=Mus musculus OX=10090 GN=Hnrnpab PE=1 SV=1	Q99020	Hnrnpab	31 kDa	TRUE	0.0017	1_4T1_cell high, 4T1_MV low, 4T1_sEV low	14	19	26	0	0	0	4	3	0	4	6	0
478	Endophilin-A2 OS=Mus musculus OX=10090 GN=Sh3gl1 PE=1 SV=1	Q62419	Sh3gl1	42 kDa		0.14	[]	3	3	3	0	0	0	5	4	13	7	10	6
479	Eukaryotic peptide chain release factor subunit 1 OS=Mus musculus OX=10090 GN=Etf1 PE=1 SV=4	Q8BWY3	Etf1	49 kDa		< 0.00010	1_4T1_cell high, 4T1_MV low, 4T1_sEV low	20	20	19	1	1	0	2	4	3	0	1	0
480	Ephrin type-B receptor 2 OS=Mus musculus OX=10090 GN=Ephb2 PE=1 SV=3	P54763	Ephb2	110 kDa	TRUE	0.0066	1_4T1_cell low, 4T1_MV high, 4T1_sEV high	0	0	0	10	10	2	4	6	8	10	12	5
481	26S proteasome non-ATPase regulatory subunit 12 OS=Mus musculus OX=10090 GN=Psmd12 PE=1 SV=4	Q9D8W5	Psmd12	53 kDa		0.00037	1_4T1_cell high, 4T1_MV low, 4T1_sEV low	18	20	15	0	0	0	4	3	0	3	3	3
482	Dynamin-2 OS=Mus musculus OX=10090 GN=Dnm2 PE=1 SV=2	P39054	Dnm2	98 kDa	TRUE	0.0019	1_4T1_cell high, 4T1_MV low, 4T1_sEV low	14	20	15	0	0	0	0	5	0	0	0	2
483	Dolichyl-diphosphooligosaccharide--protein glycosyltransferase subunit 2 OS=Mus musculus OX=10090 GN=Rpn2 PE=1 SV=1	Q9DBG6	Rpn2	69 kDa		< 0.00010	1_4T1_cell high, 4T1_MV low, 4T1_sEV low	21	21	28	0	0	0	2	4	0	0	0	0
484	Neuronal proto-oncogene tyrosine-protein kinase Src OS=Mus musculus OX=10090 GN=Src PE=1 SV=4	P05480	Src	61 kDa	TRUE	0.03	1_4T1_cell low, 4T1_MV high, 4T1_sEV high	2	2	2	2	2	2	7	7	7	8	12	12
485	DnaJ homolog subfamily A member 1 OS=Mus musculus OX=10090 GN=Dnaja1 PE=1 SV=1	P63037	Dnaja1	45 kDa		0.00036	1_4T1_cell low, 4T1_MV low, 4T1_sEV high	8	8	11	1	1	0	7	3	3	8	10	9
486	60S acidic ribosomal protein P2 OS=Mus musculus OX=10090 GN=Rplp2 PE=1 SV=3	P99027	Rplp2	12 kDa		0.004	1_4T1_cell high, 4T1_MV low, 4T1_sEV low	17	18	24	0	4	0	3	4	3	2	2	0
487	Phosphoglucomutase-1 OS=Mus musculus OX=10090 GN=Pgm1 PE=1 SV=4	Q9D0F9	Pgm1	61 kDa		0.00054	1_4T1_cell high, 4T1_MV low, 4T1_sEV low	20	24	15	0	1	0	3	4	1	0	2	0
488	Heterogeneous nuclear ribonucleoprotein A1 OS=Mus musculus OX=10090 GN=Hnrnpa1 PE=1 SV=2	P49312	Hnrnpa1	34 kDa	TRUE	0.043	1_4T1_cell high, 4T1_MV low, 4T1_sEV low	9	12	44	0	1	0	1	1	0	1	1	0
489	High mobility group protein B1 OS=Mus musculus OX=10090 GN=Hmgb1 PE=1 SV=2	P63158	Hmgb1	25 kDa	TRUE	< 0.00010	1_4T1_cell high, 4T1_MV low, 4T1_sEV low	20	21	27	0	0	0	0	1	0	2	2	1
490	Lysosome-associated membrane glycoprotein 2 OS=Mus musculus OX=10090 GN=Lamp2 PE=1 SV=2	P17047	Lamp2	46 kDa		< 0.00010	1_4T1_cell low, 4T1_MV low, 4T1_sEV high	4	4	3	16	21	5	2	2	2	3	4	6
491	60S ribosomal protein L17 OS=Mus musculus OX=10090 GN=Rpl17 PE=1 SV=3	Q9CPR4	Rpl17	21 kDa		0.0077	1_4T1_cell high, 4T1_MV low, 4T1_sEV high	12	12	13	0	0	0	4	4	0	3	6	7
492	Proteasome activator complex subunit 1 OS=Mus musculus OX=10090 GN=Psme1 PE=1 SV=2	P97371	Psme1	29 kDa		0.00087	1_4T1_cell high, 4T1_MV low, 4T1_sEV low	20	23	14	0	0	0	4	4	0	1	0	0
493	UDP-glucose:glycoprotein glucosyltransferase 1 OS=Mus musculus OX=10090 GN=Uggt1 PE=1 SV=4	Q6P5E4	Uggt1	176 kDa		0.023	1_4T1_cell high, 4T1_MV low, 4T1_sEV low	12	19	26	6	8	0	0	0	0	0	0	0
494	Cytoskeleton-associated protein 5 OS=Mus musculus OX=10090 GN=Ckap5 PE=1 SV=1	A2AGT5	Ckap5	226 kDa		< 0.00010	1_4T1_cell high, 4T1_MV low, 4T1_sEV low	20	17	30	0	0	0	0	1	0	0	0	0
495	Nucleolar RNA helicase 2 OS=Mus musculus OX=10090 GN=Ddx21 PE=1 SV=3	Q9JIK5	Ddx21	94 kDa	TRUE	0.0042	1_4T1_cell high, 4T1_MV low, 4T1_sEV low	15	14	42	0	0	0	0	0	0	1	0	0
496	Ras-related protein Rab-2A OS=Mus musculus OX=10090 GN=Rab2a PE=1 SV=1	P53994	Rab2a	24 kDa		0.013	1_4T1_cell low, 4T1_MV high, 4T1_sEV low	11	12	14	0	0	0	7	6	7	4	5	7
497	40S ribosomal protein S11 OS=Mus musculus OX=10090 GN=Rps11 PE=1 SV=3	P62281	Rps11	18 kDa		0.018	1_4T1_cell high, 4T1_MV low, 4T1_sEV high	11	11	14	0	1	0	6	6	0	5	6	7
498	Lupus La protein homolog OS=Mus musculus OX=10090 GN=Ssb PE=1 SV=1	P32067	Ssb	48 kDa		< 0.00010	1_4T1_cell high, 4T1_MV low, 4T1_sEV low	15	17	24	0	0	0	2	2	0	2	3	3
499	Transportin-1 OS=Mus musculus OX=10090 GN=Tnpo1 PE=1 SV=2	Q8BFY9	Tnpo1	102 kDa	TRUE	0.00056	1_4T1_cell high, 4T1_MV low, 4T1_sEV low	17	17	22	0	0	0	6	5	0	0	3	1
500	Elongation factor 1-beta OS=Mus musculus OX=10090 GN=Eef1b PE=1 SV=5	O70251	Eef1b	25 kDa	TRUE	< 0.00010	1_4T1_cell high, 4T1_MV low, 4T1_sEV low	17	20	20	0	0	0	5	4	2	1	1	0
501	Protein RCC2 OS=Mus musculus OX=10090 GN=Rcc2 PE=1 SV=1	Q8BK67	Rcc2	56 kDa		0.0042	1_4T1_cell high, 4T1_MV low, 4T1_sEV low	14	14	20	0	0	0	0	0	0	0	1	6
502	Prohibitin-2 OS=Mus musculus OX=10090 GN=Phb2 PE=1 SV=1	O35129	Phb2	33 kDa		< 0.00010	1_4T1_cell high, 4T1_MV high, 4T1_sEV low	16	18	24	0	0	0	5	7	2	0	0	0
503	Immunoglobulin superfamily member 3 OS=Mus musculus OX=10090 GN=Igsf3 PE=1 SV=2	Q6ZQA6	Igsf3	135 kDa		< 0.00010	1_4T1_cell low, 4T1_MV low, 4T1_sEV high	0	0	0	0	0	0	3	2	2	24	23	14
504	Dipeptidyl peptidase 3 OS=Mus musculus OX=10090 GN=Dpp3 PE=1 SV=2	Q99KK7	Dpp3	83 kDa		< 0.00010	1_4T1_cell high, 4T1_MV low, 4T1_sEV low	17	19	22	0	0	0	3	3	0	0	0	0
505	Translationally-controlled tumor protein OS=Mus musculus OX=10090 GN=Tpt1 PE=1 SV=1	P63028	Tpt1	19 kDa		0.0089	1_4T1_cell high, 4T1_MV high, 4T1_sEV low	11	12	24	1	2	1	6	5	3	1	2	1
506	Chloride intracellular channel protein 4 OS=Mus musculus OX=10090 GN=Clic4 PE=1 SV=3	Q9QYB1	Clic4	29 kDa		0.0039	1_4T1_cell low, 4T1_MV high, 4T1_sEV low	8	9	15	1	1	0	9	15	4	2	1	3
507	Calponin-3 OS=Mus musculus OX=10090 GN=Cnn3 PE=1 SV=1	Q9DAW9	Cnn3	36 kDa	TRUE	< 0.00010	1_4T1_cell high, 4T1_MV low, 4T1_sEV low	16	18	17	0	1	0	5	7	2	2	3	1
508	40S ribosomal protein S13 OS=Mus musculus OX=10090 GN=Rps13 PE=1 SV=2	P62301	Rps13	17 kDa		0.031	1_4T1_cell high, 4T1_MV low, 4T1_sEV low	8	9	14	0	1	0	5	4	0	3	3	1
509	Long-chain-fatty-acid--CoA ligase 4 OS=Mus musculus OX=10090 GN=Acsl4 PE=1 SV=2	Q9QUJ7	Acsl4	79 kDa	TRUE	0.26	[]	9	13	6	0	1	0	6	12	0	4	7	3
510	Dihydrolipoyllysine-residue succinyltransferase component of 2-oxoglutarate dehydrogenase complex, mitochondrial OS=Mus musculus OX=10090 GN=Dlst PE=1 SV=1	Q9D2G2	Dlst	49 kDa		< 0.00010	1_4T1_cell high, 4T1_MV low, 4T1_sEV low	12	13	12	10	14	3	1	1	0	0	0	0
511	26S proteasome regulatory subunit 4 OS=Mus musculus OX=10090 GN=Psmc1 PE=1 SV=1	P62192	Psmc1	49 kDa		0.00046	1_4T1_cell high, 4T1_MV low, 4T1_sEV low	14	16	22	0	0	0	4	4	0	3	4	5
512	Xaa-Pro aminopeptidase 1 OS=Mus musculus OX=10090 GN=Xpnpep1 PE=1 SV=1	Q6P1B1	Xpnpep1	70 kDa	TRUE	0.0054	1_4T1_cell high, 4T1_MV low, 4T1_sEV low	11	14	13	0	0	0	4	6	0	2	3	2
513	Heterogeneous nuclear ribonucleoprotein A3 OS=Mus musculus OX=10090 GN=Hnrnpa3 PE=1 SV=1	Q8BG05	Hnrnpa3	40 kDa	TRUE	0.066	[]	10	9	38	0	0	0	4	2	0	4	3	0
514	High mobility group protein B2 OS=Mus musculus OX=10090 GN=Hmgb2 PE=1 SV=3	P30681	Hmgb2	24 kDa	TRUE	< 0.00010	1_4T1_cell high, 4T1_MV low, 4T1_sEV low	25	22	22	0	0	0	0	0	0	0	1	2
515	Proteasome subunit alpha type-6 OS=Mus musculus OX=10090 GN=Psma6 PE=1 SV=1	Q9QUM9	Psma6	27 kDa		0.21	[]	14	14	13	4	4	0	3	5	1	1	2	4
516	Na(+)/H(+) exchange regulatory cofactor NHE-RF1 OS=Mus musculus OX=10090 GN=Slc9a3r1 PE=1 SV=3	P70441	Slc9a3r1	39 kDa		0.23	[]	4	5	5	1	1	0	4	10	8	2	5	16
517	Phospholipid scramblase 3 OS=Mus musculus OX=10090 GN=Plscr3 PE=1 SV=1	Q9JIZ9	Plscr3	32 kDa		0.00019	1_4T1_cell low, 4T1_MV high, 4T1_sEV high	0	0	1	6	7	2	3	6	5	12	10	8
518	60S ribosomal protein L18 OS=Mus musculus OX=10090 GN=Rpl18 PE=1 SV=3	P35980	Rpl18	22 kDa		0.019	1_4T1_cell high, 4T1_MV low, 4T1_sEV high	9	9	17	0	0	0	5	5	1	6	4	9
519	Protein arginine N-methyltransferase 1 OS=Mus musculus OX=10090 GN=Prmt1 PE=1 SV=1	Q9JIF0	Prmt1	42 kDa		0.01	1_4T1_cell high, 4T1_MV low, 4T1_sEV low	16	15	25	0	0	0	4	6	0	1	1	6
520	Uridine 5'-monophosphate synthase OS=Mus musculus OX=10090 GN=Umps PE=1 SV=3	P13439	Umps	52 kDa		< 0.00010	1_4T1_cell high, 4T1_MV low, 4T1_sEV low	21	22	19	0	0	0	1	1	0	1	0	1
521	Serine/threonine-protein phosphatase 2A catalytic subunit alpha isoform OS=Mus musculus OX=10090 GN=Ppp2ca PE=1 SV=1	P63330	Ppp2ca	36 kDa	TRUE	0.51	[]	10	12	14	3	2	0	7	7	1	1	2	6
522	40S ribosomal protein S6 OS=Mus musculus OX=10090 GN=Rps6 PE=1 SV=1	P62754	Rps6	29 kDa		0.033	1_4T1_cell high, 4T1_MV low, 4T1_sEV high	9	12	25	0	1	0	2	3	2	3	5	8
523	Centrosomal protein of 55 kDa OS=Mus musculus OX=10090 GN=Cep55 PE=1 SV=2	Q8BT07	Cep55	54 kDa		0.0015	1_4T1_cell low, 4T1_MV high, 4T1_sEV high	1	2	5	0	0	0	9	9	9	11	11	6
524	RuvB-like 2 OS=Mus musculus OX=10090 GN=Ruvbl2 PE=1 SV=3	Q9WTM5	Ruvbl2	51 kDa		0.00012	1_4T1_cell high, 4T1_MV low, 4T1_sEV low	17	19	17	0	0	0	4	3	1	5	2	4
525	Eukaryotic translation initiation factor 3 subunit E OS=Mus musculus OX=10090 GN=Eif3e PE=1 SV=1	P60229	Eif3e	52 kDa		0.0005	1_4T1_cell high, 4T1_MV low, 4T1_sEV low	14	16	21	0	0	0	2	1	1	0	0	4
526	26S proteasome non-ATPase regulatory subunit 6 OS=Mus musculus OX=10090 GN=Psmd6 PE=1 SV=1	Q99JI4	Psmd6	46 kDa		0.00012	1_4T1_cell high, 4T1_MV low, 4T1_sEV low	18	18	14	0	0	0	2	2	0	3	2	2
527	Serine-threonine kinase receptor-associated protein OS=Mus musculus OX=10090 GN=Strap PE=1 SV=2	Q9Z1Z2	Strap	38 kDa		0.00046	1_4T1_cell high, 4T1_MV low, 4T1_sEV low	18	17	20	1	3	0	2	2	0	0	0	2
528	V-type proton ATPase catalytic subunit A OS=Mus musculus OX=10090 GN=Atp6v1a PE=1 SV=2	P50516	Atp6v1a	68 kDa		0.00097	1_4T1_cell high, 4T1_MV low, 4T1_sEV low	19	16	12	0	0	0	3	3	0	0	1	1
529	Ran GTPase-activating protein 1 OS=Mus musculus OX=10090 GN=Rangap1 PE=1 SV=2	P46061	Rangap1	64 kDa		0.00027	1_4T1_cell high, 4T1_MV low, 4T1_sEV low	16	15	24	0	1	0	5	4	0	0	1	0
530	Heterogeneous nuclear ribonucleoprotein M OS=Mus musculus OX=10090 GN=Hnrnpm PE=1 SV=3	Q9D0E1	Hnrnpm	78 kDa		< 0.00010	1_4T1_cell high, 4T1_MV low, 4T1_sEV low	15	20	26	0	0	0	0	1	0	0	0	0
531	DNA replication licensing factor MCM7 OS=Mus musculus OX=10090 GN=Mcm7 PE=1 SV=1	Q61881	Mcm7	81 kDa		< 0.00010	1_4T1_cell high, 4T1_MV low, 4T1_sEV low	19	22	22	0	0	0	0	0	0	0	0	0
532	40S ribosomal protein S25 OS=Mus musculus OX=10090 GN=Rps25 PE=1 SV=1	P62852	Rps25	14 kDa		0.0026	1_4T1_cell high, 4T1_MV high, 4T1_sEV low	9	9	19	0	1	0	6	5	3	3	4	4
533	Ras-related protein R-Ras2 OS=Mus musculus OX=10090 GN=Rras2 PE=1 SV=1	P62071	Rras2	23 kDa	TRUE	< 0.00010	1_4T1_cell low, 4T1_MV high, 4T1_sEV high	3	3	1	0	0	0	10	10	5	9	12	8
534	Rac GTPase-activating protein 1 OS=Mus musculus OX=10090 GN=Racgap1 PE=1 SV=1	Q9WVM1	Racgap1	70 kDa		0.059	[]	0	0	0	5	4	2	20	25	1	2	5	0
535	26S proteasome regulatory subunit 8 OS=Mus musculus OX=10090 GN=Psmc5 PE=1 SV=1	P62196	Psmc5	46 kDa		0.00035	1_4T1_cell high, 4T1_MV low, 4T1_sEV low	16	18	20	0	0	0	3	3	0	2	2	5
536	Matrix metalloproteinase-9 OS=Mus musculus OX=10090 GN=Mmp9 PE=1 SV=2	P41245	Mmp9	81 kDa		0.057	[]	0	0	0	1	0	0	9	7	14	10	12	3
537	Kinectin OS=Mus musculus OX=10090 GN=Ktn1 PE=1 SV=1	Q61595	Ktn1	153 kDa		< 0.00010	1_4T1_cell high, 4T1_MV low, 4T1_sEV low	15	19	30	0	0	0	0	0	1	0	0	0
538	RNA cytosine C(5)-methyltransferase NSUN2 OS=Mus musculus OX=10090 GN=Nsun2 PE=1 SV=2	Q1HFZ0	Nsun2	85 kDa		< 0.00010	1_4T1_cell high, 4T1_MV low, 4T1_sEV low	17	21	21	0	0	0	0	0	0	0	0	0
539	Ubiquitin-conjugating enzyme E2 L3 OS=Mus musculus OX=10090 GN=Ube2l3 PE=1 SV=1	P68037	Ube2l3	18 kDa		0.056	[]	9	16	17	1	0	1	5	5	1	2	3	1
540	Ras-related protein R-Ras OS=Mus musculus OX=10090 GN=Rras PE=1 SV=1	P10833	Rras	24 kDa	TRUE	< 0.00010	1_4T1_cell low, 4T1_MV high, 4T1_sEV high	1	2	2	1	1	0	10	11	4	11	10	10
541	Guanine nucleotide-binding protein subunit alpha-11 OS=Mus musculus OX=10090 GN=Gna11 PE=1 SV=1	P21278	Gna11	42 kDa	TRUE	< 0.00010	1_4T1_cell low, 4T1_MV high, 4T1_sEV high	3	3	4	1	1	0	10	8	5	7	8	5
542	Actin-related protein 2/3 complex subunit 1B OS=Mus musculus OX=10090 GN=Arpc1b PE=1 SV=4	Q9WV32	Arpc1b	41 kDa		0.0015	1_4T1_cell low, 4T1_MV high, 4T1_sEV low	6	5	13	0	0	0	7	11	7	1	1	3
543	Complement C3 OS=Mus musculus OX=10090 GN=C3 PE=1 SV=3	P01027	C3	186 kDa	TRUE	0.27	[]	0	0	0	4	6	15	0	0	2	0	6	5
544	Cytochrome b-c1 complex subunit 2, mitochondrial OS=Mus musculus OX=10090 GN=Uqcrc2 PE=1 SV=1	Q9DB77	Uqcrc2	48 kDa		< 0.00010	1_4T1_cell high, 4T1_MV low, 4T1_sEV low	20	24	20	0	0	0	1	2	0	0	0	0
545	CCN family member 1 OS=Mus musculus OX=10090 GN=Ccn1 PE=1 SV=1	P18406	Ccn1	42 kDa		0.0096	1_4T1_cell low, 4T1_MV low, 4T1_sEV high	0	0	1	3	3	0	8	3	0	18	20	6
546	26S proteasome non-ATPase regulatory subunit 13 OS=Mus musculus OX=10090 GN=Psmd13 PE=1 SV=1	Q9WVJ2	Psmd13	43 kDa		0.00043	1_4T1_cell high, 4T1_MV low, 4T1_sEV low	16	17	19	0	0	0	1	1	0	1	1	5
547	N-acetylgalactosaminyltransferase 7 OS=Mus musculus OX=10090 GN=Galnt7 PE=1 SV=2	Q80VA0	Galnt7	75 kDa		< 0.00010	1_4T1_cell high, 4T1_MV low, 4T1_sEV low	1	0	4	25	17	6	0	0	0	0	0	0
548	Epiplakin OS=Mus musculus OX=10090 GN=Eppk1 PE=1 SV=2	Q8R0W0	Eppk1	725 kDa	TRUE	< 0.00010	1_4T1_cell high, 4T1_MV low, 4T1_sEV low	15	16	19	0	0	0	3	2	0	0	0	0
549	Ubiquitin carboxyl-terminal hydrolase 14 OS=Mus musculus OX=10090 GN=Usp14 PE=1 SV=3	Q9JMA1	Usp14	56 kDa		< 0.00010	1_4T1_cell high, 4T1_MV low, 4T1_sEV low	15	18	17	1	1	0	1	3	0	1	2	0
550	Cofilin-2 OS=Mus musculus OX=10090 GN=Cfl2 PE=1 SV=1	P45591	Cfl2	19 kDa	TRUE	< 0.00010	1_4T1_cell low, 4T1_MV high, 4T1_sEV low	4	4	7	0	0	0	11	11	6	2	3	4
551	60S ribosomal protein L12 OS=Mus musculus OX=10090 GN=Rpl12 PE=1 SV=2	P35979	Rpl12	18 kDa		< 0.00010	1_4T1_cell high, 4T1_MV low, 4T1_sEV low	13	15	23	0	0	0	5	5	2	2	2	1
552	Flotillin-2 OS=Mus musculus OX=10090 GN=Flot2 PE=1 SV=2	Q60634	Flot2	47 kDa		< 0.00010	1_4T1_cell low, 4T1_MV high, 4T1_sEV high	0	0	1	0	1	0	12	13	6	14	12	9
553	Solute carrier family 25 member 3 OS=Mus musculus OX=10090 GN=Slc25a3 PE=1 SV=1	S25A3_MOUSE	Slc25a3	?	TRUE	0.24	[]	19	21	0	1	2	0	6	7	0	2	1	0
554	UDP-glucose 6-dehydrogenase OS=Mus musculus OX=10090 GN=Ugdh PE=1 SV=1	O70475	Ugdh	55 kDa		< 0.00010	1_4T1_cell high, 4T1_MV low, 4T1_sEV low	18	21	17	0	0	0	2	1	0	0	0	1
555	Ephrin type-B receptor 4 OS=Mus musculus OX=10090 GN=Ephb4 PE=1 SV=2	P54761	Ephb4	109 kDa	TRUE	0.00039	1_4T1_cell low, 4T1_MV low, 4T1_sEV high	0	1	0	0	2	0	5	7	0	14	18	9
556	Beta-galactosidase OS=Mus musculus OX=10090 GN=Glb1 PE=1 SV=1	P23780	Glb1	73 kDa		0.059	[]	2	3	1	21	30	0	0	0	0	0	0	1
557	Junctional adhesion molecule A OS=Mus musculus OX=10090 GN=F11r PE=1 SV=2	O88792	F11r	32 kDa		0.017	1_4T1_cell low, 4T1_MV low, 4T1_sEV high	2	2	2	11	14	1	4	3	3	8	8	7
558	CD151 antigen OS=Mus musculus OX=10090 GN=Cd151 PE=1 SV=2	O35566	Cd151	28 kDa		0.35	[]	1	1	3	3	4	3	2	3	11	7	7	17
559	Bone morphogenetic protein 1 OS=Mus musculus OX=10090 GN=Bmp1 PE=1 SV=2	P98063	Bmp1	112 kDa		< 0.00010	1_4T1_cell low, 4T1_MV low, 4T1_sEV high	0	0	0	2	2	0	3	4	2	17	13	15
560	Formin-like protein 2 OS=Mus musculus OX=10090 GN=Fmnl2 PE=1 SV=2	A2APV2	Fmnl2	123 kDa	TRUE	< 0.00010	1_4T1_cell low, 4T1_MV low, 4T1_sEV high	0	1	1	0	0	0	7	6	2	11	11	9
561	E3 ubiquitin-protein ligase NEDD4-like OS=Mus musculus OX=10090 GN=Nedd4l PE=1 SV=2	Q8CFI0	Nedd4l	115 kDa	TRUE	< 0.00010	1_4T1_cell low, 4T1_MV low, 4T1_sEV high	3	3	0	0	0	0	0	2	0	16	19	14
562	N-alpha-acetyltransferase 15, NatA auxiliary subunit OS=Mus musculus OX=10090 GN=Naa15 PE=1 SV=1	Q80UM3	Naa15	101 kDa		< 0.00010	1_4T1_cell high, 4T1_MV low, 4T1_sEV low	14	16	22	0	0	0	0	1	0	0	0	3
563	Galectin-3 OS=Mus musculus OX=10090 GN=Lgals3 PE=1 SV=3	P16110	Lgals3	28 kDa		0.031	1_4T1_cell high, 4T1_MV high, 4T1_sEV low	10	9	15	6	6	1	5	3	6	0	1	1
564	Nuclear migration protein nudC OS=Mus musculus OX=10090 GN=Nudc PE=1 SV=1	O35685	Nudc	38 kDa		0.0027	1_4T1_cell high, 4T1_MV low, 4T1_sEV low	13	11	25	2	2	0	2	2	1	1	0	0
565	Suppressor of tumorigenicity 14 protein homolog OS=Mus musculus OX=10090 GN=St14 PE=1 SV=2	P56677	St14	95 kDa	TRUE	0.00042	1_4T1_cell low, 4T1_MV high, 4T1_sEV high	0	0	0	3	4	0	7	7	5	13	13	9
566	Acetyl-CoA acetyltransferase, mitochondrial OS=Mus musculus OX=10090 GN=Acat1 PE=1 SV=1	Q8QZT1	Acat1	45 kDa		0.00021	1_4T1_cell high, 4T1_MV low, 4T1_sEV low	20	20	15	0	0	0	2	4	0	0	0	0
567	DNA (cytosine-5)-methyltransferase 1 OS=Mus musculus OX=10090 GN=Dnmt1 PE=1 SV=5	P13864	Dnmt1	183 kDa		0.0075	1_4T1_cell high, 4T1_MV low, 4T1_sEV low	10	11	33	0	0	0	0	0	0	0	1	0
568	Cold shock domain-containing protein E1 OS=Mus musculus OX=10090 GN=Csde1 PE=1 SV=1	Q91W50	Csde1	89 kDa		< 0.00010	1_4T1_cell high, 4T1_MV low, 4T1_sEV low	19	14	20	0	0	0	1	0	0	0	0	0
569	Transcription intermediary factor 1-beta OS=Mus musculus OX=10090 GN=Trim28 PE=1 SV=3	Q62318	Trim28	89 kDa		< 0.00010	1_4T1_cell high, 4T1_MV low, 4T1_sEV low	21	18	24	0	0	0	0	0	0	0	0	0
570	26S proteasome regulatory subunit 10B OS=Mus musculus OX=10090 GN=Psmc6 PE=1 SV=1	P62334	Psmc6	44 kDa		< 0.00010	1_4T1_cell high, 4T1_MV low, 4T1_sEV low	14	14	17	1	1	0	2	2	0	4	4	4
571	Guanine nucleotide-binding protein subunit alpha-13 OS=Mus musculus OX=10090 GN=Gna13 PE=1 SV=1	P27601	Gna13	44 kDa	TRUE	< 0.00010	1_4T1_cell low, 4T1_MV high, 4T1_sEV high	2	4	2	0	0	0	13	11	6	6	8	6
572	STE20-like serine/threonine-protein kinase OS=Mus musculus OX=10090 GN=Slk PE=1 SV=2	O54988	Slk	141 kDa	TRUE	0.011	1_4T1_cell high, 4T1_MV high, 4T1_sEV low	16	7	20	0	0	0	3	8	1	0	0	1
573	Proteasome subunit alpha type-2 OS=Mus musculus OX=10090 GN=Psma2 PE=1 SV=3	P49722	Psma2	26 kDa		0.00037	1_4T1_cell high, 4T1_MV low, 4T1_sEV low	12	11	16	1	1	0	3	2	0	2	2	2
574	Protein SET OS=Mus musculus OX=10090 GN=Set PE=1 SV=1	Q9EQU5	Set	33 kDa		0.00043	1_4T1_cell high, 4T1_MV low, 4T1_sEV low	15	15	22	2	2	0	3	3	1	2	2	0
575	10 kDa heat shock protein, mitochondrial OS=Mus musculus OX=10090 GN=Hspe1 PE=1 SV=2	Q64433	Hspe1	11 kDa		0.37	[]	7	8	12	2	2	7	5	4	2	0	0	0
576	Syntaxin-binding protein 2 OS=Mus musculus OX=10090 GN=Stxbp2 PE=1 SV=1	Q64324	Stxbp2	66 kDa		0.14	[]	11	14	6	0	0	0	7	8	0	3	6	1
577	Cytosolic purine 5'-nucleotidase OS=Mus musculus OX=10090 GN=Nt5c2 PE=1 SV=2	Q3V1L4	Nt5c2	65 kDa		< 0.00010	1_4T1_cell high, 4T1_MV low, 4T1_sEV low	10	13	13	0	0	0	2	2	1	0	1	2
578	Cysteine--tRNA ligase, cytoplasmic OS=Mus musculus OX=10090 GN=Cars1 PE=1 SV=2	Q9ER72	Cars1	95 kDa		0.00014	1_4T1_cell high, 4T1_MV low, 4T1_sEV low	17	19	17	0	0	0	1	5	0	0	0	0
579	Splicing factor 3B subunit 3 OS=Mus musculus OX=10090 GN=Sf3b3 PE=1 SV=1	Q921M3	Sf3b3	136 kDa		< 0.00010	1_4T1_cell high, 4T1_MV low, 4T1_sEV low	13	17	23	0	0	0	0	0	0	2	0	3
580	Aminopeptidase B OS=Mus musculus OX=10090 GN=Rnpep PE=1 SV=2	Q8VCT3	Rnpep	72 kDa		< 0.00010	1_4T1_cell high, 4T1_MV low, 4T1_sEV low	16	17	22	0	0	0	3	3	0	0	0	0
581	Structural maintenance of chromosomes protein 2 OS=Mus musculus OX=10090 GN=Smc2 PE=1 SV=2	Q8CG48	Smc2	134 kDa		< 0.00010	1_4T1_cell high, 4T1_MV low, 4T1_sEV low	19	17	24	0	0	0	0	0	0	0	0	0
582	Tumor-associated calcium signal transducer 2 OS=Mus musculus OX=10090 GN=Tacstd2 PE=1 SV=1	Q8BGV3	Tacstd2	36 kDa		< 0.00010	1_4T1_cell low, 4T1_MV high, 4T1_sEV high	1	1	0	9	12	3	4	5	4	5	6	7
583	Dihydrolipoyllysine-residue acetyltransferase component of pyruvate dehydrogenase complex, mitochondrial OS=Mus musculus OX=10090 GN=Dlat PE=1 SV=2	Q8BMF4	Dlat	68 kDa		0.02	1_4T1_cell high, 4T1_MV low, 4T1_sEV low	16	13	11	4	4	3	1	2	0	2	1	1
584	Vacuolar protein sorting-associated protein 4B OS=Mus musculus OX=10090 GN=Vps4b PE=1 SV=2	P46467	Vps4b	49 kDa	TRUE	0.0017	1_4T1_cell low, 4T1_MV low, 4T1_sEV high	5	6	8	0	0	0	4	3	4	6	8	8
585	Inositol-3-phosphate synthase 1 OS=Mus musculus OX=10090 GN=Isyna1 PE=1 SV=1	Q9JHU9	Isyna1	61 kDa		0.00088	1_4T1_cell high, 4T1_MV low, 4T1_sEV low	14	14	10	5	4	1	4	3	1	0	0	0
586	Lipolysis-stimulated lipoprotein receptor OS=Mus musculus OX=10090 GN=Lsr PE=1 SV=1	Q99KG5	Lsr	66 kDa		0.0055	1_4T1_cell low, 4T1_MV low, 4T1_sEV high	0	0	0	1	2	1	3	3	6	11	12	15
587	Integrin beta-6 OS=Mus musculus OX=10090 GN=Itgb6 PE=1 SV=1	Q9Z0T9	Itgb6	86 kDa		0.027	1_4T1_cell low, 4T1_MV high, 4T1_sEV high	0	0	0	8	12	1	5	6	3	6	6	12
588	CD166 antigen OS=Mus musculus OX=10090 GN=Alcam PE=1 SV=3	Q61490	Alcam	65 kDa		0.19	[]	0	0	0	6	10	0	7	6	11	5	7	4
589	Proteasome subunit alpha type-1 OS=Mus musculus OX=10090 GN=Psma1 PE=1 SV=1	Q9R1P4	Psma1	30 kDa		0.022	1_4T1_cell high, 4T1_MV low, 4T1_sEV low	11	11	18	2	2	0	3	3	0	0	0	3
590	Protein tweety homolog 3 OS=Mus musculus OX=10090 GN=Ttyh3 PE=1 SV=1	Q6P5F7	Ttyh3	58 kDa		0.0016	1_4T1_cell low, 4T1_MV low, 4T1_sEV high	1	1	0	0	0	0	1	1	1	14	15	24
591	Urokinase-type plasminogen activator OS=Mus musculus OX=10090 GN=Plau PE=1 SV=1	P06869	Plau	48 kDa	TRUE	0.00014	1_4T1_cell low, 4T1_MV low, 4T1_sEV high	0	0	0	0	0	0	5	3	5	15	14	17
592	DNA replication licensing factor MCM5 OS=Mus musculus OX=10090 GN=Mcm5 PE=1 SV=2	P49718	Mcm5	82 kDa		< 0.00010	1_4T1_cell high, 4T1_MV low, 4T1_sEV low	19	20	15	0	0	0	1	1	0	0	0	0
593	Pre-mRNA-processing factor 19 OS=Mus musculus OX=10090 GN=Prpf19 PE=1 SV=1	Q99KP6	Prpf19	55 kDa		0.0012	1_4T1_cell high, 4T1_MV low, 4T1_sEV low	13	13	24	0	0	0	0	0	0	0	0	4
594	Condensin complex subunit 1 OS=Mus musculus OX=10090 GN=Ncapd2 PE=1 SV=2	Q8K2Z4	Ncapd2	156 kDa		< 0.00010	1_4T1_cell high, 4T1_MV low, 4T1_sEV low	14	21	17	0	0	0	0	0	0	0	0	0
595	Caspase-3 OS=Mus musculus OX=10090 GN=Casp3 PE=1 SV=1	P70677	Casp3	31 kDa		0.0031	1_4T1_cell high, 4T1_MV high, 4T1_sEV low	14	12	9	3	3	1	4	4	2	2	0	1
596	Proteasome subunit alpha type-4 OS=Mus musculus OX=10090 GN=Psma4 PE=1 SV=1	Q9R1P0	Psma4	29 kDa		0.21	[]	11	12	11	6	6	0	4	4	0	1	1	2
597	Superoxide dismutase [Cu-Zn] OS=Mus musculus OX=10090 GN=Sod1 PE=1 SV=2	P08228	Sod1	16 kDa		< 0.00010	1_4T1_cell high, 4T1_MV high, 4T1_sEV low	8	9	6	10	11	2	5	4	1	1	0	0
598	Ubiquitin thioesterase OTUB1 OS=Mus musculus OX=10090 GN=Otub1 PE=1 SV=2	Q7TQI3	Otub1	31 kDa		0.00043	1_4T1_cell high, 4T1_MV high, 4T1_sEV low	13	13	13	0	0	0	7	7	2	5	4	2
599	CD82 antigen OS=Mus musculus OX=10090 GN=Cd82 PE=1 SV=1	P40237	Cd82	30 kDa		0.017	1_4T1_cell low, 4T1_MV low, 4T1_sEV high	0	0	0	11	10	1	2	3	3	8	9	13
600	Cytochrome b-c1 complex subunit 1, mitochondrial OS=Mus musculus OX=10090 GN=Uqcrc1 PE=1 SV=2	Q9CZ13	Uqcrc1	53 kDa	TRUE	0.0001	1_4T1_cell high, 4T1_MV low, 4T1_sEV low	17	17	18	1	1	1	1	0	0	0	0	0
601	Ribose-phosphate pyrophosphokinase 1 OS=Mus musculus OX=10090 GN=Prps1 PE=1 SV=4	Q9D7G0	Prps1	35 kDa	TRUE	< 0.00010	1_4T1_cell high, 4T1_MV low, 4T1_sEV low	16	14	19	0	0	0	0	2	0	0	1	2
602	SUMO-activating enzyme subunit 2 OS=Mus musculus OX=10090 GN=Uba2 PE=1 SV=1	Q9Z1F9	Uba2	71 kDa		< 0.00010	1_4T1_cell high, 4T1_MV low, 4T1_sEV low	16	14	22	0	0	0	0	0	0	2	2	3
603	Far upstream element-binding protein 2 OS=Mus musculus OX=10090 GN=Khsrp PE=1 SV=2	Q3U0V1	Khsrp	77 kDa	TRUE	< 0.00010	1_4T1_cell high, 4T1_MV low, 4T1_sEV low	15	17	24	0	0	0	0	0	0	0	0	0
604	Ectonucleoside triphosphate diphosphohydrolase 3 OS=Mus musculus OX=10090 GN=Entpd3 PE=1 SV=1	ENTP3_MOUSE	Entpd3	?	TRUE	0.12	[]	2	0	0	15	14	0	5	4	0	7	8	0
605	Exportin-5 OS=Mus musculus OX=10090 GN=Xpo5 PE=1 SV=1	Q924C1	Xpo5	137 kDa		< 0.00010	1_4T1_cell high, 4T1_MV low, 4T1_sEV low	11	16	23	0	0	0	1	1	0	1	0	0
606	Elongation factor G, mitochondrial OS=Mus musculus OX=10090 GN=Gfm1 PE=1 SV=1	Q8K0D5	Gfm1	84 kDa		< 0.00010	1_4T1_cell high, 4T1_MV low, 4T1_sEV low	6	6	11	14	15	5	0	0	0	0	0	0
607	Tyrosine-protein kinase Lyn OS=Mus musculus OX=10090 GN=Lyn PE=1 SV=4	P25911	Lyn	59 kDa	TRUE	< 0.00010	1_4T1_cell low, 4T1_MV high, 4T1_sEV high	0	0	0	0	0	0	7	6	2	11	10	6
608	Glutamine--tRNA ligase OS=Mus musculus OX=10090 GN=Qars1 PE=1 SV=1	Q8BML9	Qars1	88 kDa	TRUE	0.00019	1_4T1_cell high, 4T1_MV low, 4T1_sEV low	13	14	22	0	0	0	1	1	0	0	0	3
609	Phosphoribosylformylglycinamidine synthase OS=Mus musculus OX=10090 GN=Pfas PE=1 SV=1	Q5SUR0	Pfas	145 kDa		< 0.00010	1_4T1_cell high, 4T1_MV low, 4T1_sEV low	13	14	21	0	0	0	0	0	0	0	0	1
610	Tyrosine--tRNA ligase, cytoplasmic OS=Mus musculus OX=10090 GN=Yars1 PE=1 SV=3	Q91WQ3	Yars1	59 kDa		< 0.00010	1_4T1_cell high, 4T1_MV low, 4T1_sEV low	13	10	20	0	0	0	1	1	0	0	0	0
611	Nuclear autoantigenic sperm protein OS=Mus musculus OX=10090 GN=Nasp PE=1 SV=2	Q99MD9	Nasp	84 kDa		< 0.00010	1_4T1_cell high, 4T1_MV low, 4T1_sEV low	16	17	19	0	0	0	0	0	0	0	0	0
612	Fatty acid-binding protein 5 OS=Mus musculus OX=10090 GN=Fabp5 PE=1 SV=3	Q05816	Fabp5	15 kDa		0.0025	1_4T1_cell high, 4T1_MV low, 4T1_sEV low	10	12	10	3	4	1	4	4	2	1	2	3
613	Ubiquitin-conjugating enzyme E2 N OS=Mus musculus OX=10090 GN=Ube2n PE=1 SV=1	P61089	Ube2n	17 kDa	TRUE	0.0021	1_4T1_cell high, 4T1_MV low, 4T1_sEV low	8	11	12	0	1	0	5	3	1	1	1	2
614	Adhesion G protein-coupled receptor L2 OS=Mus musculus OX=10090 GN=Adgrl2 PE=1 SV=3	Q8JZZ7	Adgrl2	167 kDa		0.11	[]	0	0	0	7	8	0	5	4	2	7	6	4
615	F-actin-capping protein subunit alpha-1 OS=Mus musculus OX=10090 GN=Capza1 PE=1 SV=4	P47753	Capza1	33 kDa	TRUE	0.00032	1_4T1_cell low, 4T1_MV high, 4T1_sEV low	10	9	8	0	0	0	8	8	5	3	4	0
616	Plexin-A1 OS=Mus musculus OX=10090 GN=Plxna1 PE=1 SV=1	P70206	Plxna1	211 kDa		< 0.00010	1_4T1_cell low, 4T1_MV high, 4T1_sEV high	0	0	0	1	1	0	6	5	4	11	11	8
617	F-actin-capping protein subunit alpha-2 OS=Mus musculus OX=10090 GN=Capza2 PE=1 SV=3	P47754	Capza2	33 kDa	TRUE	0.0012	1_4T1_cell high, 4T1_MV high, 4T1_sEV low	12	11	7	0	0	0	9	11	3	2	2	0
618	Vascular cell adhesion protein 1 OS=Mus musculus OX=10090 GN=Vcam1 PE=1 SV=1	P29533	Vcam1	81 kDa		0.23	[]	0	0	0	7	8	0	3	4	7	4	6	8
619	Eukaryotic initiation factor 4A-III OS=Mus musculus OX=10090 GN=Eif4a3 PE=1 SV=3	Q91VC3	Eif4a3	47 kDa	TRUE	0.0036	1_4T1_cell high, 4T1_MV low, 4T1_sEV low	11	8	18	0	0	0	0	3	0	3	2	4
620	Src substrate cortactin OS=Mus musculus OX=10090 GN=Cttn PE=1 SV=2	Q60598	Cttn	61 kDa		0.0056	1_4T1_cell high, 4T1_MV high, 4T1_sEV low	6	6	14	0	0	0	5	8	7	0	0	0
621	Coatomer subunit beta OS=Mus musculus OX=10090 GN=Copb1 PE=1 SV=1	Q9JIF7	Copb1	107 kDa		< 0.00010	1_4T1_cell high, 4T1_MV low, 4T1_sEV low	15	17	18	0	0	0	1	1	0	0	0	2
622	m7GpppX diphosphatase OS=Mus musculus OX=10090 GN=Dcps PE=1 SV=1	Q9DAR7	Dcps	39 kDa		< 0.00010	1_4T1_cell high, 4T1_MV low, 4T1_sEV low	13	15	21	0	0	0	2	2	0	0	0	0
623	E3 ubiquitin-protein ligase UBR4 OS=Mus musculus OX=10090 GN=Ubr4 PE=1 SV=1	A2AN08	Ubr4	572 kDa		0.08	[]	12	11	14	0	0	0	0	0	0	0	0	8
624	Ras GTPase-activating protein-binding protein 1 OS=Mus musculus OX=10090 GN=G3bp1 PE=1 SV=1	P97855	G3bp1	52 kDa	TRUE	< 0.00010	1_4T1_cell high, 4T1_MV low, 4T1_sEV low	17	18	19	0	0	0	2	1	0	0	0	0
625	Low-density lipoprotein receptor OS=Mus musculus OX=10090 GN=Ldlr PE=1 SV=2	P35951	Ldlr	95 kDa	TRUE	0.00029	1_4T1_cell low, 4T1_MV low, 4T1_sEV high	3	3	6	11	13	2	1	0	1	5	6	2
626	F-actin-capping protein subunit beta OS=Mus musculus OX=10090 GN=Capzb PE=1 SV=3	P47757	Capzb	31 kDa		0.0071	1_4T1_cell high, 4T1_MV high, 4T1_sEV low	8	11	8	0	2	0	5	7	2	1	1	0
627	Nicotinamide phosphoribosyltransferase OS=Mus musculus OX=10090 GN=Nampt PE=1 SV=1	Q99KQ4	Nampt	55 kDa		0.0037	1_4T1_cell high, 4T1_MV low, 4T1_sEV low	16	14	9	0	2	0	1	2	0	0	0	0
628	Clusterin OS=Mus musculus OX=10090 GN=Clu PE=1 SV=1	Q06890	Clu	52 kDa		0.0035	1_4T1_cell low, 4T1_MV low, 4T1_sEV high	0	0	0	0	0	0	2	5	2	13	12	22
629	40S ribosomal protein S17 OS=Mus musculus OX=10090 GN=Rps17 PE=1 SV=2	P63276	Rps17	16 kDa		< 0.00010	1_4T1_cell high, 4T1_MV low, 4T1_sEV low	16	15	21	0	0	0	5	3	0	0	0	1
630	Vacuolar protein sorting-associated protein 37B OS=Mus musculus OX=10090 GN=Vps37b PE=1 SV=1	Q8R0J7	Vps37b	31 kDa		< 0.00010	1_4T1_cell low, 4T1_MV low, 4T1_sEV high	0	0	0	0	0	0	1	3	2	12	17	16
631	Structural maintenance of chromosomes protein 4 OS=Mus musculus OX=10090 GN=Smc4 PE=1 SV=1	Q8CG47	Smc4	147 kDa		0.00022	1_4T1_cell high, 4T1_MV low, 4T1_sEV low	11	12	25	0	0	0	0	0	0	0	0	0
632	Mitogen-activated protein kinase 1 OS=Mus musculus OX=10090 GN=Mapk1 PE=1 SV=3	P63085	Mapk1	41 kDa	TRUE	0.02	1_4T1_cell high, 4T1_MV low, 4T1_sEV low	10	11	14	1	3	0	4	3	1	0	1	2
633	Platelet-activating factor acetylhydrolase IB subunit beta OS=Mus musculus OX=10090 GN=Pafah1b1 PE=1 SV=2	P63005	Pafah1b1	47 kDa		0.0017	1_4T1_cell high, 4T1_MV low, 4T1_sEV low	6	6	9	0	1	0	2	1	1	0	0	1
634	Rho-related GTP-binding protein RhoG OS=Mus musculus OX=10090 GN=Rhog PE=1 SV=1	P84096	Rhog	21 kDa	TRUE	0.0002	1_4T1_cell low, 4T1_MV high, 4T1_sEV high	3	4	5	0	0	0	4	5	4	8	7	8
635	Dolichyl-diphosphooligosaccharide--protein glycosyltransferase 48 kDa subunit OS=Mus musculus OX=10090 GN=Ddost PE=1 SV=2	O54734	Ddost	49 kDa		0.054	[]	10	10	15	3	3	3	3	3	0	0	0	0
636	Vacuolar protein sorting-associated protein 37C OS=Mus musculus OX=10090 GN=Vps37c PE=1 SV=1	Q8R105	Vps37c	38 kDa		< 0.00010	1_4T1_cell low, 4T1_MV low, 4T1_sEV high	0	0	1	0	0	0	1	2	3	17	19	15
637	Thioredoxin-like protein 1 OS=Mus musculus OX=10090 GN=Txnl1 PE=1 SV=3	Q8CDN6	Txnl1	32 kDa		< 0.00010	1_4T1_cell high, 4T1_MV low, 4T1_sEV low	13	13	16	0	0	0	2	2	0	0	1	0
638	Epidermal growth factor receptor kinase substrate 8 OS=Mus musculus OX=10090 GN=Eps8 PE=1 SV=2	Q08509	Eps8	92 kDa		0.056	[]	1	0	0	0	0	0	4	9	1	8	7	21
639	Septin-9 OS=Mus musculus OX=10090 GN=Septin9 PE=1 SV=1	Q80UG5	Septin9	66 kDa		0.0003	1_4T1_cell high, 4T1_MV low, 4T1_sEV low	11	15	16	0	0	0	3	3	0	0	0	2
640	Fumarate hydratase, mitochondrial OS=Mus musculus OX=10090 GN=Fh PE=1 SV=3	P97807	Fh	54 kDa		< 0.00010	1_4T1_cell high, 4T1_MV low, 4T1_sEV low	18	14	19	0	0	0	2	4	0	0	0	0
641	Nuclear mitotic apparatus protein 1 OS=Mus musculus OX=10090 GN=Numa1 PE=1 SV=1	E9Q7G0	Numa1	236 kDa		0.058	[]	6	9	38	0	0	0	0	0	0	0	0	0
642	Solute carrier family 2, facilitated glucose transporter member 1 OS=Mus musculus OX=10090 GN=Slc2a1 PE=1 SV=4	P17809	Slc2a1	54 kDa		0.15	[]	3	3	1	2	2	2	9	5	10	7	7	7
643	FERM, ARHGEF and pleckstrin domain-containing protein 1 OS=Mus musculus OX=10090 GN=Farp1 PE=1 SV=1	F8VPU2	Farp1	119 kDa		0.0099	1_4T1_cell low, 4T1_MV high, 4T1_sEV high	1	1	2	0	0	0	8	7	1	10	11	3
644	Neutral amino acid transporter A OS=Mus musculus OX=10090 GN=Slc1a4 PE=1 SV=1	O35874	Slc1a4	56 kDa		0.031	1_4T1_cell low, 4T1_MV high, 4T1_sEV high	2	1	0	2	2	0	6	6	9	9	8	12
645	NADH-cytochrome b5 reductase 3 OS=Mus musculus OX=10090 GN=Cyb5r3 PE=1 SV=3	Q9DCN2	Cyb5r3	34 kDa		0.0038	1_4T1_cell high, 4T1_MV low, 4T1_sEV low	10	12	11	2	1	0	2	3	1	1	1	1
646	Carboxypeptidase D OS=Mus musculus OX=10090 GN=Cpd PE=1 SV=2	O89001	Cpd	152 kDa		< 0.00010	1_4T1_cell high, 4T1_MV low, 4T1_sEV low	1	1	4	15	18	4	0	0	0	1	0	0
647	Serine/arginine-rich splicing factor 1 OS=Mus musculus OX=10090 GN=Srsf1 PE=1 SV=3	Q6PDM2	Srsf1	28 kDa		< 0.00010	1_4T1_cell high, 4T1_MV low, 4T1_sEV low	11	12	21	0	0	0	0	0	0	2	1	0
648	Importin-4 OS=Mus musculus OX=10090 GN=Ipo4 PE=1 SV=1	Q8VI75	Ipo4	119 kDa		< 0.00010	1_4T1_cell high, 4T1_MV low, 4T1_sEV low	13	17	19	0	0	0	1	1	0	0	0	0
649	Ribonucleoside-diphosphate reductase large subunit OS=Mus musculus OX=10090 GN=Rrm1 PE=1 SV=2	P07742	Rrm1	90 kDa		< 0.00010	1_4T1_cell high, 4T1_MV low, 4T1_sEV low	17	20	15	0	0	0	0	0	0	0	0	0
650	CD2-associated protein OS=Mus musculus OX=10090 GN=Cd2ap PE=1 SV=3	Q9JLQ0	Cd2ap	70 kDa		0.0045	1_4T1_cell low, 4T1_MV high, 4T1_sEV high	4	5	11	0	0	0	3	7	3	5	6	7
651	Superoxide dismutase [Mn], mitochondrial OS=Mus musculus OX=10090 GN=Sod2 PE=1 SV=3	P09671	Sod2	25 kDa		< 0.00010	1_4T1_cell high, 4T1_MV high, 4T1_sEV low	4	3	2	13	17	3	1	2	0	0	0	0
652	Leucine-rich repeat-containing protein 59 OS=Mus musculus OX=10090 GN=Lrrc59 PE=1 SV=1	Q922Q8	Lrrc59	35 kDa		0.0001	1_4T1_cell high, 4T1_MV low, 4T1_sEV low	14	13	22	0	1	0	2	3	0	0	0	1
653	Phenylalanine--tRNA ligase beta subunit OS=Mus musculus OX=10090 GN=Farsb PE=1 SV=2	Q9WUA2	Farsb	66 kDa		0.016	1_4T1_cell high, 4T1_MV low, 4T1_sEV low	14	12	15	0	0	0	1	2	0	1	0	6
654	Protein FAM3C OS=Mus musculus OX=10090 GN=Fam3c PE=1 SV=1	Q91VU0	Fam3c	25 kDa		< 0.00010	1_4T1_cell high, 4T1_MV low, 4T1_sEV low	2	2	4	19	24	8	0	0	0	0	0	0
655	Ubiquitin-like modifier-activating enzyme 6 OS=Mus musculus OX=10090 GN=Uba6 PE=1 SV=1	Q8C7R4	Uba6	118 kDa		0.00031	1_4T1_cell high, 4T1_MV low, 4T1_sEV low	14	13	17	0	0	0	2	2	0	0	0	3
656	Transportin-2 OS=Mus musculus OX=10090 GN=Tnpo2 PE=1 SV=1	Q99LG2	Tnpo2	100 kDa	TRUE	0.00054	1_4T1_cell high, 4T1_MV low, 4T1_sEV low	13	15	11	0	0	0	4	3	0	0	0	0
657	Chromodomain-helicase-DNA-binding protein 4 OS=Mus musculus OX=10090 GN=Chd4 PE=1 SV=1	Q6PDQ2	Chd4	218 kDa		< 0.00010	1_4T1_cell high, 4T1_MV low, 4T1_sEV low	10	12	22	0	0	0	0	0	0	0	0	0
658	Tyrosine-protein phosphatase non-receptor type 23 OS=Mus musculus OX=10090 GN=Ptpn23 PE=1 SV=2	Q6PB44	Ptpn23	185 kDa		0.014	1_4T1_cell low, 4T1_MV high, 4T1_sEV low	6	8	8	0	0	0	3	7	3	5	4	1
659	TAR DNA-binding protein 43 OS=Mus musculus OX=10090 GN=Tardbp PE=1 SV=1	Q921F2	Tardbp	45 kDa		< 0.00010	1_4T1_cell high, 4T1_MV low, 4T1_sEV low	13	14	15	0	0	0	1	2	0	1	2	1
660	Dual specificity mitogen-activated protein kinase kinase 1 OS=Mus musculus OX=10090 GN=Map2k1 PE=1 SV=2	P31938	Map2k1	43 kDa	TRUE	0.0001	1_4T1_cell high, 4T1_MV high, 4T1_sEV low	11	12	9	0	0	0	3	4	2	1	0	1
661	NSFL1 cofactor p47 OS=Mus musculus OX=10090 GN=Nsfl1c PE=1 SV=1	Q9CZ44	Nsfl1c	41 kDa		0.00017	1_4T1_cell high, 4T1_MV low, 4T1_sEV low	13	14	20	0	0	0	3	5	0	0	0	0
662	Multivesicular body subunit 12B OS=Mus musculus OX=10090 GN=Mvb12b PE=1 SV=2	Q6KAU4	Mvb12b	35 kDa		< 0.00010	1_4T1_cell low, 4T1_MV low, 4T1_sEV high	0	0	0	0	0	0	2	2	1	13	16	13
663	Hexokinase-2 OS=Mus musculus OX=10090 GN=Hk2 PE=1 SV=1	O08528	Hk2	103 kDa	TRUE	< 0.00010	1_4T1_cell high, 4T1_MV low, 4T1_sEV low	14	15	22	0	0	0	0	1	0	0	0	1
664	Nuclear pore complex protein Nup155 OS=Mus musculus OX=10090 GN=Nup155 PE=1 SV=1	Q99P88	Nup155	155 kDa		< 0.00010	1_4T1_cell high, 4T1_MV low, 4T1_sEV low	15	15	23	0	0	0	1	1	0	0	0	0
665	Eukaryotic translation initiation factor 5B OS=Mus musculus OX=10090 GN=Eif5b PE=1 SV=2	Q05D44	Eif5b	138 kDa		< 0.00010	1_4T1_cell high, 4T1_MV low, 4T1_sEV low	12	15	24	0	0	0	0	0	0	1	0	0
666	Nuclear pore complex protein Nup133 OS=Mus musculus OX=10090 GN=Nup133 PE=1 SV=2	Q8R0G9	Nup133	129 kDa		0.00013	1_4T1_cell high, 4T1_MV low, 4T1_sEV low	15	13	29	0	0	0	0	0	0	0	0	0
667	Actin-related protein 2/3 complex subunit 4 OS=Mus musculus OX=10090 GN=Arpc4 PE=1 SV=3	P59999	Arpc4	20 kDa		0.00088	1_4T1_cell low, 4T1_MV high, 4T1_sEV low	7	7	6	0	1	0	8	9	7	2	3	3
668	Programmed cell death protein 6 OS=Mus musculus OX=10090 GN=Pdcd6 PE=1 SV=2	P12815	Pdcd6	22 kDa		0.00019	1_4T1_cell low, 4T1_MV high, 4T1_sEV high	2	1	4	0	0	0	5	7	6	11	10	9
669	ADP-ribosyl cyclase/cyclic ADP-ribose hydrolase 2 OS=Mus musculus OX=10090 GN=Bst1 PE=1 SV=1	Q64277	Bst1	35 kDa		0.088	[]	0	0	0	6	6	0	5	10	2	7	9	6
670	Interleukin enhancer-binding factor 2 OS=Mus musculus OX=10090 GN=Ilf2 PE=1 SV=1	Q9CXY6	Ilf2	43 kDa		0.0076	1_4T1_cell high, 4T1_MV low, 4T1_sEV low	10	13	13	0	0	0	2	5	1	2	5	0
671	Vacuolar protein sorting-associated protein 28 homolog OS=Mus musculus OX=10090 GN=Vps28 PE=1 SV=1	Q9D1C8	Vps28	25 kDa		< 0.00010	1_4T1_cell low, 4T1_MV low, 4T1_sEV high	1	0	0	0	0	0	1	1	1	15	20	15
672	Multivesicular body subunit 12A OS=Mus musculus OX=10090 GN=Mvb12a PE=1 SV=1	Q78HU3	Mvb12a	29 kDa		< 0.00010	1_4T1_cell low, 4T1_MV low, 4T1_sEV high	0	1	0	0	0	0	4	3	2	12	11	14
673	Stomatin-like protein 2, mitochondrial OS=Mus musculus OX=10090 GN=Stoml2 PE=1 SV=1	Q99JB2	Stoml2	38 kDa		0.0075	1_4T1_cell high, 4T1_MV low, 4T1_sEV low	8	9	9	9	14	1	0	1	0	0	0	0
674	Adenylate kinase 2, mitochondrial OS=Mus musculus OX=10090 GN=Ak2 PE=1 SV=5	Q9WTP6	Ak2	26 kDa		< 0.00010	1_4T1_cell high, 4T1_MV low, 4T1_sEV low	16	15	15	0	1	0	3	3	0	0	0	0
675	Tubulin--tyrosine ligase-like protein 12 OS=Mus musculus OX=10090 GN=Ttll12 PE=1 SV=1	Q3UDE2	Ttll12	74 kDa		0.00037	1_4T1_cell high, 4T1_MV low, 4T1_sEV low	16	16	13	0	0	0	1	3	0	0	0	2
676	Protein flightless-1 homolog OS=Mus musculus OX=10090 GN=Flii PE=1 SV=1	Q9JJ28	Flii	145 kDa		< 0.00010	1_4T1_cell high, 4T1_MV low, 4T1_sEV low	15	15	18	0	0	0	0	1	0	0	0	1
677	Cytosolic phospholipase A2 OS=Mus musculus OX=10090 GN=Pla2g4a PE=1 SV=1	P47713	Pla2g4a	85 kDa		< 0.00010	1_4T1_cell high, 4T1_MV low, 4T1_sEV low	16	15	11	0	0	0	0	1	0	0	0	0
678	Signal recognition particle subunit SRP68 OS=Mus musculus OX=10090 GN=Srp68 PE=1 SV=2	Q8BMA6	Srp68	71 kDa		< 0.00010	1_4T1_cell high, 4T1_MV low, 4T1_sEV low	15	14	20	0	0	0	0	0	0	0	0	0
679	Nuclear pore complex protein Nup93 OS=Mus musculus OX=10090 GN=Nup93 PE=1 SV=1	Q8BJ71	Nup93	93 kDa		< 0.00010	1_4T1_cell high, 4T1_MV low, 4T1_sEV low	13	15	20	0	0	0	0	0	0	0	0	0
680	Lactoylglutathione lyase OS=Mus musculus OX=10090 GN=Glo1 PE=1 SV=3	Q9CPU0	Glo1	21 kDa		0.13	[]	8	9	8	2	4	0	2	2	0	1	1	1
681	Coronin-1C OS=Mus musculus OX=10090 GN=Coro1c PE=1 SV=2	Q9WUM4	Coro1c	53 kDa		0.11	[]	2	2	13	6	5	0	6	8	7	1	1	0
682	60S ribosomal protein L15 OS=Mus musculus OX=10090 GN=Rpl15 PE=1 SV=4	Q9CZM2	Rpl15	24 kDa		0.041	1_4T1_cell high, 4T1_MV low, 4T1_sEV low	5	7	14	0	1	0	2	2	1	1	1	3
683	60S ribosomal protein L14 OS=Mus musculus OX=10090 GN=Rpl14 PE=1 SV=3	Q9CR57	Rpl14	24 kDa		0.00074	1_4T1_cell high, 4T1_MV low, 4T1_sEV low	9	10	11	0	1	0	3	4	1	3	5	3
684	Transmembrane 9 superfamily member 3 OS=Mus musculus OX=10090 GN=Tm9sf3 PE=1 SV=1	Q9ET30	Tm9sf3	68 kDa		< 0.00010	1_4T1_cell high, 4T1_MV low, 4T1_sEV high	1	1	1	14	15	7	0	0	0	1	1	0
685	Multidrug resistance-associated protein 1 OS=Mus musculus OX=10090 GN=Abcc1 PE=1 SV=1	O35379	Abcc1	171 kDa		0.017	1_4T1_cell low, 4T1_MV high, 4T1_sEV low	1	0	2	0	0	0	11	8	13	4	4	3
686	Interleukin enhancer-binding factor 3 OS=Mus musculus OX=10090 GN=Ilf3 PE=1 SV=2	Q9Z1X4	Ilf3	96 kDa	TRUE	0.051	[]	5	7	17	0	0	0	1	1	2	3	2	0
687	40S ribosomal protein S19 OS=Mus musculus OX=10090 GN=Rps19 PE=1 SV=3	Q9CZX8	Rps19	16 kDa		0.0023	1_4T1_cell high, 4T1_MV high, 4T1_sEV low	10	10	19	0	1	0	5	3	4	1	0	0
688	Cell surface hyaluronidase OS=Mus musculus OX=10090 GN=Cemip2 PE=1 SV=1	Q5FWI3	Cemip2	154 kDa	TRUE	0.076	[]	0	0	0	15	16	0	0	1	2	3	2	3
689	26S proteasome non-ATPase regulatory subunit 7 OS=Mus musculus OX=10090 GN=Psmd7 PE=1 SV=2	P26516	Psmd7	37 kDa		0.00085	1_4T1_cell high, 4T1_MV low, 4T1_sEV low	13	14	13	0	0	0	3	1	0	0	1	3
690	Syntenin-2 OS=Mus musculus OX=10090 GN=Sdcbp2 PE=2 SV=1	Q99JZ0	Sdcbp2	32 kDa		< 0.00010	1_4T1_cell low, 4T1_MV low, 4T1_sEV high	0	0	0	0	0	0	2	2	2	17	15	11
691	eIF5-mimic protein 2 OS=Mus musculus OX=10090 GN=Bzw1 PE=1 SV=1	5MP2_MOUSE	Bzw1	?	TRUE	0.12	[]	11	20	0	0	0	0	2	3	0	0	1	0
692	COP9 signalosome complex subunit 4 OS=Mus musculus OX=10090 GN=Cops4 PE=1 SV=1	O88544	Cops4	46 kDa		< 0.00010	1_4T1_cell high, 4T1_MV low, 4T1_sEV low	13	16	14	0	0	0	2	1	0	0	0	0
693	Ribose-phosphate pyrophosphokinase 2 OS=Mus musculus OX=10090 GN=Prps2 PE=1 SV=4	Q9CS42	Prps2	35 kDa	TRUE	< 0.00010	1_4T1_cell high, 4T1_MV low, 4T1_sEV low	14	14	16	0	0	0	0	0	0	0	0	0
694	Heterogeneous nuclear ribonucleoprotein D0 OS=Mus musculus OX=10090 GN=Hnrnpd PE=1 SV=2	Q60668	Hnrnpd	38 kDa	TRUE	0.02	1_4T1_cell high, 4T1_MV low, 4T1_sEV low	8	10	18	0	2	0	2	2	1	3	3	0
695	Cathepsin B OS=Mus musculus OX=10090 GN=Ctsb PE=1 SV=2	P10605	Ctsb	37 kDa		0.09	[]	9	11	4	9	11	0	1	0	0	1	0	1
696	ATP-dependent 6-phosphofructokinase, platelet type OS=Mus musculus OX=10090 GN=Pfkp PE=1 SV=1	Q9WUA3	Pfkp	85 kDa	TRUE	0.029	1_4T1_cell high, 4T1_MV low, 4T1_sEV low	14	21	5	0	0	0	3	3	0	0	2	0
697	RNA-splicing ligase RtcB homolog OS=Mus musculus OX=10090 GN=Rtcb PE=1 SV=1	Q99LF4	Rtcb	55 kDa		0.00037	1_4T1_cell high, 4T1_MV low, 4T1_sEV low	8	11	11	0	0	0	1	3	0	0	0	1
698	26S proteasome non-ATPase regulatory subunit 5 OS=Mus musculus OX=10090 GN=Psmd5 PE=1 SV=4	Q8BJY1	Psmd5	56 kDa		0.0016	1_4T1_cell high, 4T1_MV low, 4T1_sEV low	15	16	10	0	0	0	4	3	0	0	1	0
699	Importin subunit alpha-3 OS=Mus musculus OX=10090 GN=Kpna4 PE=1 SV=1	O35343	Kpna4	58 kDa	TRUE	< 0.00010	1_4T1_cell high, 4T1_MV low, 4T1_sEV low	14	14	17	0	0	0	1	4	0	0	0	0
700	Calpain-1 catalytic subunit OS=Mus musculus OX=10090 GN=Capn1 PE=1 SV=1	O35350	Capn1	82 kDa		0.00021	1_4T1_cell high, 4T1_MV low, 4T1_sEV low	13	13	18	0	0	0	3	5	0	0	0	0
701	Hydroxymethylglutaryl-CoA synthase, cytoplasmic OS=Mus musculus OX=10090 GN=Hmgcs1 PE=1 SV=1	Q8JZK9	Hmgcs1	58 kDa		< 0.00010	1_4T1_cell high, 4T1_MV low, 4T1_sEV low	16	18	18	0	0	0	1	1	0	0	0	0
702	26S proteasome regulatory subunit 6B OS=Mus musculus OX=10090 GN=Psmc4 PE=1 SV=2	P54775	Psmc4	47 kDa		< 0.00010	1_4T1_cell high, 4T1_MV low, 4T1_sEV low	15	14	13	0	0	0	0	0	0	0	0	0
703	Structural maintenance of chromosomes protein 3 OS=Mus musculus OX=10090 GN=Smc3 PE=1 SV=2	Q9CW03	Smc3	142 kDa		0.00023	1_4T1_cell high, 4T1_MV low, 4T1_sEV low	11	11	24	0	0	0	0	0	0	0	0	0
704	Nectin-2 OS=Mus musculus OX=10090 GN=Nectin2 PE=1 SV=2	P32507	Nectin2	57 kDa		0.0089	1_4T1_cell low, 4T1_MV low, 4T1_sEV high	3	2	0	10	9	1	1	2	1	7	8	4
705	Sodium bicarbonate cotransporter 3 OS=Mus musculus OX=10090 GN=Slc4a7 PE=1 SV=2	Q8BTY2	Slc4a7	117 kDa		0.035	1_4T1_cell low, 4T1_MV high, 4T1_sEV high	5	4	5	0	0	1	10	7	4	8	5	3
706	Eukaryotic translation initiation factor 6 OS=Mus musculus OX=10090 GN=Eif6 PE=1 SV=2	O55135	Eif6	27 kDa		0.059	[]	9	8	14	2	3	0	3	2	0	1	2	1
707	Unconventional myosin-Ie OS=Mus musculus OX=10090 GN=Myo1e PE=1 SV=1	E9Q634	Myo1e	127 kDa	TRUE	0.041	1_4T1_cell low, 4T1_MV high, 4T1_sEV low	8	7	3	0	0	0	10	9	1	3	2	2
708	40S ribosomal protein S12 OS=Mus musculus OX=10090 GN=Rps12 PE=1 SV=2	P63323	Rps12	15 kDa		0.032	1_4T1_cell high, 4T1_MV low, 4T1_sEV low	7	10	14	0	2	0	4	4	0	1	0	1
709	General vesicular transport factor p115 OS=Mus musculus OX=10090 GN=Uso1 PE=1 SV=2	Q9Z1Z0	Uso1	107 kDa		< 0.00010	1_4T1_cell high, 4T1_MV low, 4T1_sEV low	15	16	13	0	0	0	1	1	0	1	1	1
710	Isocitrate dehydrogenase [NADP] cytoplasmic OS=Mus musculus OX=10090 GN=Idh1 PE=1 SV=2	O88844	Idh1	47 kDa	TRUE	< 0.00010	1_4T1_cell high, 4T1_MV low, 4T1_sEV low	12	14	11	0	0	0	2	2	0	0	0	0
711	Activator of 90 kDa heat shock protein ATPase homolog 1 OS=Mus musculus OX=10090 GN=Ahsa1 PE=1 SV=2	Q8BK64	Ahsa1	38 kDa		< 0.00010	1_4T1_cell high, 4T1_MV low, 4T1_sEV low	13	15	12	0	0	0	1	2	0	0	0	0
712	Ribosome-binding protein 1 OS=Mus musculus OX=10090 GN=Rrbp1 PE=1 SV=2	Q99PL5	Rrbp1	173 kDa		< 0.00010	1_4T1_cell high, 4T1_MV low, 4T1_sEV low	11	13	20	0	0	0	0	0	1	0	0	0
713	Ferritin heavy chain OS=Mus musculus OX=10090 GN=Fth1 PE=1 SV=2	P09528	Fth1	21 kDa		0.0006	1_4T1_cell high, 4T1_MV low, 4T1_sEV high	4	6	0	5	6	2	2	0	1	0	1	4
714	Laminin subunit beta-3 OS=Mus musculus OX=10090 GN=Lamb3 PE=1 SV=2	Q61087	Lamb3	129 kDa		0.15	[]	2	1	2	4	7	0	7	1	2	8	7	5
715	60S ribosomal protein L13 OS=Mus musculus OX=10090 GN=Rpl13 PE=1 SV=3	P47963	Rpl13	24 kDa		0.00029	1_4T1_cell high, 4T1_MV low, 4T1_sEV low	9	12	19	0	1	0	1	2	1	0	1	1
716	Proteasome subunit beta type-2 OS=Mus musculus OX=10090 GN=Psmb2 PE=1 SV=1	Q9R1P3	Psmb2	23 kDa		< 0.00010	1_4T1_cell high, 4T1_MV low, 4T1_sEV low	8	8	9	0	1	0	0	1	0	1	1	1
717	Hsp90 co-chaperone Cdc37 OS=Mus musculus OX=10090 GN=Cdc37 PE=1 SV=1	Q61081	Cdc37	45 kDa		< 0.00010	1_4T1_cell high, 4T1_MV low, 4T1_sEV low	12	12	11	0	0	0	1	2	0	1	1	1
718	Heparan sulfate 2-O-sulfotransferase 1 OS=Mus musculus OX=10090 GN=Hs2st1 PE=1 SV=2	Q8R3H7	Hs2st1	42 kDa		0.012	1_4T1_cell high, 4T1_MV low, 4T1_sEV low	3	2	2	16	15	1	0	0	0	0	0	0
719	Thimet oligopeptidase OS=Mus musculus OX=10090 GN=Thop1 PE=1 SV=1	Q8C1A5	Thop1	78 kDa		< 0.00010	1_4T1_cell high, 4T1_MV low, 4T1_sEV low	11	11	14	0	1	0	1	1	0	0	0	0
720	DNA ligase 1 OS=Mus musculus OX=10090 GN=Lig1 PE=1 SV=2	P37913	Lig1	102 kDa		< 0.00010	1_4T1_cell high, 4T1_MV low, 4T1_sEV low	10	14	16	0	0	0	0	0	0	0	0	0
721	2',3'-cyclic-nucleotide 3'-phosphodiesterase OS=Mus musculus OX=10090 GN=Cnp PE=1 SV=3	P16330	Cnp	47 kDa		0.44	[]	4	4	3	6	4	0	6	5	1	6	4	5
722	Cell cycle control protein 50A OS=Mus musculus OX=10090 GN=Tmem30a PE=1 SV=1	Q8VEK0	Tmem30a	41 kDa		0.013	1_4T1_cell low, 4T1_MV high, 4T1_sEV low	1	1	1	14	18	1	2	2	2	1	1	0
723	Casein kinase II subunit alpha OS=Mus musculus OX=10090 GN=Csnk2a1 PE=1 SV=2	Q60737	Csnk2a1	45 kDa		0.085	[]	8	7	9	1	0	0	2	3	0	3	2	6
724	Proteasome subunit alpha type-5 OS=Mus musculus OX=10090 GN=Psma5 PE=1 SV=1	Q9Z2U1	Psma5	26 kDa		0.074	[]	10	9	8	2	3	0	1	2	1	0	0	2
725	Leucyl-cystinyl aminopeptidase OS=Mus musculus OX=10090 GN=Lnpep PE=1 SV=1	Q8C129	Lnpep	117 kDa		0.0052	1_4T1_cell low, 4T1_MV low, 4T1_sEV high	5	5	7	0	0	0	4	4	1	3	8	5
726	Ceruloplasmin OS=Mus musculus OX=10090 GN=Cp PE=1 SV=2	Q61147	Cp	121 kDa		0.034	1_4T1_cell low, 4T1_MV low, 4T1_sEV high	0	0	0	0	1	1	2	8	1	6	10	15
727	Actin-related protein 2 OS=Mus musculus OX=10090 GN=Actr2 PE=1 SV=1	P61161	Actr2	45 kDa		0.0015	1_4T1_cell high, 4T1_MV high, 4T1_sEV low	8	6	8	0	0	0	10	10	2	0	0	0
728	Acetyl-CoA acetyltransferase, cytosolic OS=Mus musculus OX=10090 GN=Acat2 PE=1 SV=2	Q8CAY6	Acat2	41 kDa		0.006	1_4T1_cell high, 4T1_MV low, 4T1_sEV low	12	16	8	1	1	0	3	3	0	0	0	0
729	Eukaryotic translation initiation factor 2 subunit 2 OS=Mus musculus OX=10090 GN=Eif2s2 PE=1 SV=1	Q99L45	Eif2s2	38 kDa		< 0.00010	1_4T1_cell high, 4T1_MV low, 4T1_sEV low	14	13	16	0	0	0	2	2	0	0	0	0
730	CCR4-NOT transcription complex subunit 1 OS=Mus musculus OX=10090 GN=Cnot1 PE=1 SV=2	Q6ZQ08	Cnot1	267 kDa		< 0.00010	1_4T1_cell high, 4T1_MV low, 4T1_sEV low	10	12	16	0	0	0	0	0	0	0	0	2
731	E3 ubiquitin-protein ligase HECTD1 OS=Mus musculus OX=10090 GN=Hectd1 PE=1 SV=2	Q69ZR2	Hectd1	290 kDa		< 0.00010	1_4T1_cell high, 4T1_MV low, 4T1_sEV low	11	14	16	0	0	0	0	0	0	0	0	0
732	DNA mismatch repair protein Msh2 OS=Mus musculus OX=10090 GN=Msh2 PE=1 SV=1	P43247	Msh2	104 kDa		< 0.00010	1_4T1_cell high, 4T1_MV low, 4T1_sEV low	16	13	16	0	0	0	0	0	0	0	0	0
733	Trophoblast glycoprotein OS=Mus musculus OX=10090 GN=Tpbg PE=1 SV=3	Q9Z0L0	Tpbg	46 kDa		0.019	1_4T1_cell low, 4T1_MV low, 4T1_sEV high	1	1	1	10	18	1	1	1	1	1	2	4
734	Neuroplastin OS=Mus musculus OX=10090 GN=Nptn PE=1 SV=3	P97300	Nptn	44 kDa		< 0.00010	1_4T1_cell low, 4T1_MV high, 4T1_sEV high	1	0	0	12	19	5	1	2	1	1	1	1
735	Calcium-binding protein 39 OS=Mus musculus OX=10090 GN=Cab39 PE=1 SV=2	Q06138	Cab39	40 kDa		0.0037	1_4T1_cell low, 4T1_MV high, 4T1_sEV low	5	5	5	0	0	0	5	5	5	2	3	2
736	60S ribosomal protein L10 OS=Mus musculus OX=10090 GN=Rpl10 PE=1 SV=3	Q6ZWV3	Rpl10	25 kDa		0.00013	1_4T1_cell high, 4T1_MV low, 4T1_sEV low	12	11	12	0	0	0	3	2	0	2	3	2
737	Eukaryotic translation initiation factor 3 subunit F OS=Mus musculus OX=10090 GN=Eif3f PE=1 SV=2	Q9DCH4	Eif3f	38 kDa		0.00044	1_4T1_cell high, 4T1_MV low, 4T1_sEV low	11	13	12	0	0	0	2	3	1	3	3	0
738	60S ribosomal protein L18a OS=Mus musculus OX=10090 GN=Rpl18a PE=1 SV=1	P62717	Rpl18a	21 kDa		0.00038	1_4T1_cell high, 4T1_MV low, 4T1_sEV high	6	5	9	0	0	0	1	2	0	3	3	2
739	Cathepsin D OS=Mus musculus OX=10090 GN=Ctsd PE=1 SV=1	P18242	Ctsd	45 kDa		0.017	1_4T1_cell high, 4T1_MV low, 4T1_sEV low	6	6	3	8	16	1	0	2	0	0	0	1
740	Eukaryotic translation initiation factor 3 subunit I OS=Mus musculus OX=10090 GN=Eif3i PE=1 SV=1	Q9QZD9	Eif3i	36 kDa		0.0027	1_4T1_cell high, 4T1_MV low, 4T1_sEV low	11	11	16	0	1	0	2	3	0	1	0	3
741	NPC intracellular cholesterol transporter 2 OS=Mus musculus OX=10090 GN=Npc2 PE=1 SV=1	Q9Z0J0	Npc2	16 kDa		< 0.00010	1_4T1_cell high, 4T1_MV low, 4T1_sEV low	3	1	2	11	14	4	0	0	0	0	0	0
742	Ubiquitin carboxyl-terminal hydrolase 5 OS=Mus musculus OX=10090 GN=Usp5 PE=1 SV=1	P56399	Usp5	96 kDa		< 0.00010	1_4T1_cell high, 4T1_MV low, 4T1_sEV low	15	14	18	0	0	0	1	0	0	0	0	0
743	Succinyl-CoA:3-ketoacid coenzyme A transferase 1, mitochondrial OS=Mus musculus OX=10090 GN=Oxct1 PE=1 SV=1	Q9D0K2	Oxct1	56 kDa		< 0.00010	1_4T1_cell high, 4T1_MV low, 4T1_sEV low	16	17	12	0	0	0	0	0	0	0	0	0
744	Matrin-3 OS=Mus musculus OX=10090 GN=Matr3 PE=1 SV=1	Q8K310	Matr3	95 kDa		< 0.00010	1_4T1_cell high, 4T1_MV low, 4T1_sEV low	10	14	18	0	0	0	0	0	0	0	0	0
745	Solute carrier family 12 member 2 OS=Mus musculus OX=10090 GN=Slc12a2 PE=1 SV=2	P55012	Slc12a2	131 kDa	TRUE	< 0.00010	1_4T1_cell low, 4T1_MV high, 4T1_sEV high	0	0	2	1	1	0	7	5	3	5	6	4
746	40S ribosomal protein S15a OS=Mus musculus OX=10090 GN=Rps15a PE=1 SV=2	P62245	Rps15a	15 kDa		0.0035	1_4T1_cell high, 4T1_MV low, 4T1_sEV low	6	8	13	0	1	0	4	2	1	1	1	1
747	Myosin regulatory light chain 12B OS=Mus musculus OX=10090 GN=Myl12b PE=1 SV=2	Q3THE2	Myl12b	20 kDa		< 0.00010	1_4T1_cell high, 4T1_MV high, 4T1_sEV low	9	11	10	0	0	0	5	7	2	1	1	1
748	Copine-1 OS=Mus musculus OX=10090 GN=Cpne1 PE=1 SV=1	Q8C166	Cpne1	59 kDa	TRUE	0.0028	1_4T1_cell low, 4T1_MV high, 4T1_sEV low	7	8	5	0	0	0	5	4	4	3	3	2
749	Ras-related protein Rab-6A OS=Mus musculus OX=10090 GN=Rab6a PE=1 SV=4	P35279	Rab6a	24 kDa		0.11	[]	4	5	9	0	0	0	8	6	0	4	3	4
750	Ornithine aminotransferase, mitochondrial OS=Mus musculus OX=10090 GN=Oat PE=1 SV=1	P29758	Oat	48 kDa		0.31	[]	14	13	11	1	1	4	1	2	0	0	0	0
751	Lon protease homolog, mitochondrial OS=Mus musculus OX=10090 GN=Lonp1 PE=1 SV=2	Q8CGK3	Lonp1	106 kDa		0.026	1_4T1_cell high, 4T1_MV low, 4T1_sEV low	13	9	8	1	0	1	0	1	0	0	0	0
752	Dihydroorotate dehydrogenase (quinone), mitochondrial OS=Mus musculus OX=10090 GN=Dhodh PE=1 SV=2	O35435	Dhodh	43 kDa		0.011	1_4T1_cell high, 4T1_MV low, 4T1_sEV low	0	1	2	16	19	1	0	0	0	0	0	0
753	ATP-binding cassette sub-family F member 1 OS=Mus musculus OX=10090 GN=Abcf1 PE=1 SV=1	Q6P542	Abcf1	95 kDa		0.00015	1_4T1_cell high, 4T1_MV low, 4T1_sEV low	10	9	16	0	0	0	0	1	0	0	1	2
754	Aminoacyl tRNA synthase complex-interacting multifunctional protein 2 OS=Mus musculus OX=10090 GN=Aimp2 PE=1 SV=2	Q8R010	Aimp2	35 kDa		< 0.00010	1_4T1_cell high, 4T1_MV low, 4T1_sEV low	13	14	13	0	0	0	1	1	0	0	0	1
755	Aldehyde dehydrogenase family 3 member A2 OS=Mus musculus OX=10090 GN=Aldh3a2 PE=1 SV=2	P47740	Aldh3a2	54 kDa	TRUE	< 0.00010	1_4T1_cell high, 4T1_MV low, 4T1_sEV low	7	10	1	11	15	3	0	0	0	0	0	0
756	Core histone macro-H2A.1 OS=Mus musculus OX=10090 GN=Macroh2a1 PE=1 SV=4	Q9QZQ8	Macroh2a1	39 kDa		0.012	1_4T1_cell low, 4T1_MV low, 4T1_sEV high	0	0	6	0	0	0	1	3	0	7	10	17
757	Phenylalanine--tRNA ligase alpha subunit OS=Mus musculus OX=10090 GN=Farsa PE=1 SV=1	Q8C0C7	Farsa	58 kDa		0.15	[]	9	11	9	0	0	0	1	1	0	0	0	7
758	Heterogeneous nuclear ribonucleoprotein L OS=Mus musculus OX=10090 GN=Hnrnpl PE=1 SV=2	Q8R081	Hnrnpl	64 kDa		0.017	1_4T1_cell high, 4T1_MV low, 4T1_sEV low	7	7	25	0	0	0	0	0	0	0	0	1
759	Elongation factor Tu, mitochondrial OS=Mus musculus OX=10090 GN=Tufm PE=1 SV=1	Q8BFR5	Tufm	50 kDa		< 0.00010	1_4T1_cell high, 4T1_MV low, 4T1_sEV low	12	16	18	0	1	0	0	1	0	0	0	0
760	Prohibitin 1 OS=Mus musculus OX=10090 GN=Phb1 PE=1 SV=1	PHB1_MOUSE	Phb1	?	TRUE	0.15	[]	15	20	0	0	2	0	3	5	0	0	0	0
761	Prolyl 4-hydroxylase subunit alpha-1 OS=Mus musculus OX=10090 GN=P4ha1 PE=1 SV=2	Q60715	P4ha1	61 kDa		< 0.00010	1_4T1_cell high, 4T1_MV low, 4T1_sEV low	14	15	11	0	0	0	1	0	0	0	0	0
762	Protein SGT1 homolog OS=Mus musculus OX=10090 GN=Sugt1 PE=1 SV=3	Q9CX34	Sugt1	38 kDa		< 0.00010	1_4T1_cell high, 4T1_MV low, 4T1_sEV low	12	14	14	0	0	0	0	0	0	0	0	0
763	E3 ubiquitin-protein ligase HUWE1 OS=Mus musculus OX=10090 GN=Huwe1 PE=1 SV=5	Q7TMY8	Huwe1	483 kDa		< 0.00010	1_4T1_cell high, 4T1_MV low, 4T1_sEV low	10	16	17	0	0	0	0	0	0	0	0	0
764	Far upstream element-binding protein 1 OS=Mus musculus OX=10090 GN=Fubp1 PE=1 SV=1	Q91WJ8	Fubp1	69 kDa	TRUE	< 0.00010	1_4T1_cell high, 4T1_MV low, 4T1_sEV low	13	11	19	0	0	0	0	0	0	0	0	0
765	Charged multivesicular body protein 4b OS=Mus musculus OX=10090 GN=Chmp4b PE=1 SV=2	Q9D8B3	Chmp4b	25 kDa		0.3	[]	1	2	2	2	2	0	2	2	8	6	4	9
766	Equilibrative nucleoside transporter 1 OS=Mus musculus OX=10090 GN=Slc29a1 PE=1 SV=3	Q9JIM1	Slc29a1	50 kDa		0.23	[]	0	1	2	1	2	2	3	1	7	8	8	7
767	Proteasome subunit beta type-3 OS=Mus musculus OX=10090 GN=Psmb3 PE=1 SV=1	Q9R1P1	Psmb3	23 kDa		0.096	[]	8	7	9	0	2	0	3	3	0	1	2	2
768	Proteasome subunit beta type-1 OS=Mus musculus OX=10090 GN=Psmb1 PE=1 SV=1	O09061	Psmb1	26 kDa		0.0068	1_4T1_cell high, 4T1_MV low, 4T1_sEV low	14	14	8	2	2	0	0	1	0	0	0	1
769	FACT complex subunit SPT16 OS=Mus musculus OX=10090 GN=Supt16h PE=1 SV=2	Q920B9	Supt16h	120 kDa		0.011	1_4T1_cell high, 4T1_MV low, 4T1_sEV low	4	5	13	0	0	0	0	0	1	0	0	0
770	Protein arginine N-methyltransferase 5 OS=Mus musculus OX=10090 GN=Prmt5 PE=1 SV=3	Q8CIG8	Prmt5	73 kDa		0.0019	1_4T1_cell high, 4T1_MV low, 4T1_sEV low	8	12	13	0	0	0	1	1	0	0	0	3
771	Isocitrate dehydrogenase [NAD] subunit alpha, mitochondrial OS=Mus musculus OX=10090 GN=Idh3a PE=1 SV=1	Q9D6R2	Idh3a	40 kDa		< 0.00010	1_4T1_cell high, 4T1_MV low, 4T1_sEV low	13	14	13	0	1	0	3	2	0	0	0	0
772	E3 ubiquitin-protein ligase RNF213 OS=Mus musculus OX=10090 GN=Rnf213 PE=1 SV=2	E9Q555	Rnf213	585 kDa		< 0.00010	1_4T1_cell high, 4T1_MV low, 4T1_sEV low	8	8	15	0	0	0	0	0	0	0	0	0
773	Formin-like protein 3 OS=Mus musculus OX=10090 GN=Fmnl3 PE=1 SV=2	Q6ZPF4	Fmnl3	117 kDa	TRUE	0.00013	1_4T1_cell low, 4T1_MV low, 4T1_sEV high	1	0	0	0	0	0	3	5	1	10	10	5
774	Eukaryotic translation initiation factor 4 gamma 2 OS=Mus musculus OX=10090 GN=Eif4g2 PE=1 SV=2	Q62448	Eif4g2	102 kDa		< 0.00010	1_4T1_cell high, 4T1_MV low, 4T1_sEV low	13	15	15	0	0	0	1	2	0	0	0	0
775	Acidic leucine-rich nuclear phosphoprotein 32 family member E OS=Mus musculus OX=10090 GN=Anp32e PE=1 SV=2	P97822	Anp32e	30 kDa		< 0.00010	1_4T1_cell high, 4T1_MV low, 4T1_sEV low	17	17	13	0	0	0	1	1	0	0	0	0
776	MICOS complex subunit Mic60 OS=Mus musculus OX=10090 GN=Immt PE=1 SV=1	Q8CAQ8	Immt	84 kDa		< 0.00010	1_4T1_cell high, 4T1_MV low, 4T1_sEV low	10	12	19	0	0	0	0	0	0	0	0	0
777	DNA-(apurinic or apyrimidinic site) endonuclease OS=Mus musculus OX=10090 GN=Apex1 PE=1 SV=2	P28352	Apex1	35 kDa		< 0.00010	1_4T1_cell high, 4T1_MV low, 4T1_sEV low	15	16	16	0	0	0	0	0	0	0	0	0
778	Proteasome subunit beta type-5 OS=Mus musculus OX=10090 GN=Psmb5 PE=1 SV=3	O55234	Psmb5	29 kDa		0.43	[]	9	8	11	3	2	0	2	2	3	1	1	3
779	S-adenosylmethionine synthase isoform type-2 OS=Mus musculus OX=10090 GN=Mat2a PE=1 SV=2	Q3THS6	Mat2a	44 kDa		0.00095	1_4T1_cell high, 4T1_MV low, 4T1_sEV low	7	8	15	0	1	0	1	1	0	1	1	1
780	BRO1 domain-containing protein BROX OS=Mus musculus OX=10090 GN=Brox PE=1 SV=1	Q8K2Q7	Brox	46 kDa		0.0019	1_4T1_cell low, 4T1_MV low, 4T1_sEV high	2	3	1	0	0	0	3	4	2	10	13	4
781	Protein EFR3 homolog A OS=Mus musculus OX=10090 GN=Efr3a PE=1 SV=1	Q8BG67	Efr3a	93 kDa	TRUE	0.081	[]	2	3	2	0	0	0	7	9	0	7	6	2
782	Bone marrow stromal antigen 2 OS=Mus musculus OX=10090 GN=Bst2 PE=1 SV=1	Q8R2Q8	Bst2	19 kDa		0.00048	1_4T1_cell low, 4T1_MV high, 4T1_sEV high	0	0	0	11	9	3	1	3	5	4	3	6
783	Tissue factor OS=Mus musculus OX=10090 GN=F3 PE=1 SV=2	P20352	F3	33 kDa		0.071	[]	0	0	0	7	5	0	5	3	1	8	7	8
784	Copine-2 OS=Mus musculus OX=10090 GN=Cpne2 PE=1 SV=1	P59108	Cpne2	61 kDa	TRUE	0.018	1_4T1_cell low, 4T1_MV low, 4T1_sEV high	0	0	3	3	3	0	4	5	0	7	7	8
785	Sorting nexin-2 OS=Mus musculus OX=10090 GN=Snx2 PE=1 SV=2	Q9CWK8	Snx2	58 kDa	TRUE	0.00066	1_4T1_cell high, 4T1_MV low, 4T1_sEV low	9	11	13	0	0	0	4	3	0	1	1	1
786	Alpha-centractin OS=Mus musculus OX=10090 GN=Actr1a PE=1 SV=1	P61164	Actr1a	43 kDa	TRUE	0.021	1_4T1_cell high, 4T1_MV low, 4T1_sEV low	10	10	10	0	0	0	3	4	1	0	0	4
787	Eukaryotic translation initiation factor 3 subunit D OS=Mus musculus OX=10090 GN=Eif3d PE=1 SV=2	O70194	Eif3d	64 kDa		< 0.00010	1_4T1_cell high, 4T1_MV low, 4T1_sEV low	11	13	13	0	0	0	2	1	0	0	0	2
788	Probable ubiquitin carboxyl-terminal hydrolase FAF-X OS=Mus musculus OX=10090 GN=Usp9x PE=1 SV=2	P70398	Usp9x	291 kDa	TRUE	0.0031	1_4T1_cell high, 4T1_MV low, 4T1_sEV low	7	11	13	0	0	0	0	1	0	0	0	3
789	V-type proton ATPase subunit B, brain isoform OS=Mus musculus OX=10090 GN=Atp6v1b2 PE=1 SV=1	P62814	Atp6v1b2	57 kDa		0.0008	1_4T1_cell high, 4T1_MV low, 4T1_sEV low	14	16	8	0	0	0	1	0	0	0	0	0
790	NADPH--cytochrome P450 reductase OS=Mus musculus OX=10090 GN=Por PE=1 SV=2	P37040	Por	77 kDa		0.00071	1_4T1_cell high, 4T1_MV low, 4T1_sEV low	17	13	10	0	0	0	0	2	0	0	0	0
791	Nascent polypeptide-associated complex subunit alpha, muscle-specific form OS=Mus musculus OX=10090 GN=Naca PE=1 SV=2	P70670	Naca	220 kDa		0.0013	1_4T1_cell high, 4T1_MV low, 4T1_sEV low	9	10	11	1	0	0	4	2	2	1	1	2
792	Disks large homolog 1 OS=Mus musculus OX=10090 GN=Dlg1 PE=1 SV=1	Q811D0	Dlg1	100 kDa	TRUE	< 0.00010	1_4T1_cell low, 4T1_MV high, 4T1_sEV high	0	0	0	3	4	1	5	5	2	3	4	3
793	Anoctamin-6 OS=Mus musculus OX=10090 GN=Ano6 PE=1 SV=1	Q6P9J9	Ano6	106 kDa		0.056	[]	1	1	0	2	2	0	6	3	7	6	6	6
794	Prostaglandin E synthase 3 OS=Mus musculus OX=10090 GN=Ptges3 PE=1 SV=1	Q9R0Q7	Ptges3	19 kDa		0.0053	1_4T1_cell high, 4T1_MV low, 4T1_sEV low	7	8	11	0	1	0	3	3	0	1	1	0
795	60S ribosomal protein L8 OS=Mus musculus OX=10090 GN=Rpl8 PE=1 SV=2	P62918	Rpl8	28 kDa		0.00096	1_4T1_cell high, 4T1_MV low, 4T1_sEV low	8	9	14	0	0	0	2	3	0	1	1	2
796	Mitogen-activated protein kinase kinase kinase kinase 4 OS=Mus musculus OX=10090 GN=Map4k4 PE=1 SV=1	P97820	Map4k4	141 kDa	TRUE	< 0.00010	1_4T1_cell low, 4T1_MV low, 4T1_sEV high	1	0	0	0	0	0	2	2	0	8	11	6
797	NAD-dependent malic enzyme, mitochondrial OS=Mus musculus OX=10090 GN=Me2 PE=1 SV=1	Q99KE1	Me2	66 kDa		< 0.00010	1_4T1_cell high, 4T1_MV low, 4T1_sEV low	7	6	6	8	9	4	0	0	0	0	0	0
798	Tryptophan--tRNA ligase, cytoplasmic OS=Mus musculus OX=10090 GN=Wars1 PE=1 SV=2	P32921	Wars1	54 kDa		0.049	1_4T1_cell high, 4T1_MV low, 4T1_sEV low	14	13	9	0	0	0	1	1	0	0	0	6
799	Neurolysin, mitochondrial OS=Mus musculus OX=10090 GN=Nln PE=1 SV=1	Q91YP2	Nln	80 kDa		0.051	[]	8	9	9	5	6	0	0	0	0	0	0	0
800	Importin-9 OS=Mus musculus OX=10090 GN=Ipo9 PE=1 SV=3	Q91YE6	Ipo9	116 kDa		< 0.00010	1_4T1_cell high, 4T1_MV low, 4T1_sEV low	14	14	11	0	0	0	0	1	0	0	0	0
801	Transcription factor BTF3 OS=Mus musculus OX=10090 GN=Btf3 PE=1 SV=3	Q64152	Btf3	22 kDa		< 0.00010	1_4T1_cell high, 4T1_MV low, 4T1_sEV low	12	18	15	0	0	0	0	1	0	0	0	0
802	NEDD8-activating enzyme E1 regulatory subunit OS=Mus musculus OX=10090 GN=Nae1 PE=1 SV=1	Q8VBW6	Nae1	60 kDa		< 0.00010	1_4T1_cell high, 4T1_MV low, 4T1_sEV low	11	10	12	0	0	0	0	0	0	0	0	0
803	Cullin-4B OS=Mus musculus OX=10090 GN=Cul4b PE=1 SV=1	A2A432	Cul4b	111 kDa	TRUE	< 0.00010	1_4T1_cell high, 4T1_MV low, 4T1_sEV low	9	14	16	0	0	0	0	0	0	0	0	0
804	Thioredoxin OS=Mus musculus OX=10090 GN=Txn PE=1 SV=3	P10639	Txn	12 kDa		0.57	[]	5	7	10	1	1	4	3	1	3	1	1	3
805	Parkinson disease protein 7 homolog OS=Mus musculus OX=10090 GN=Park7 PE=1 SV=1	Q99LX0	Park7	20 kDa		0.0053	1_4T1_cell high, 4T1_MV low, 4T1_sEV low	9	11	6	0	1	0	2	1	1	0	1	1
806	Ras-related protein Rap-2c OS=Mus musculus OX=10090 GN=Rap2c PE=1 SV=1	Q8BU31	Rap2c	21 kDa	TRUE	0.00024	1_4T1_cell low, 4T1_MV low, 4T1_sEV high	2	3	0	0	1	0	4	5	1	6	9	7
807	Hsc70-interacting protein OS=Mus musculus OX=10090 GN=St13 PE=1 SV=1	Q99L47	St13	42 kDa		0.0013	1_4T1_cell high, 4T1_MV low, 4T1_sEV low	10	9	8	0	0	0	1	2	2	1	1	0
808	60S ribosomal protein L30 OS=Mus musculus OX=10090 GN=Rpl30 PE=1 SV=2	P62889	Rpl30	13 kDa		< 0.00010	1_4T1_cell high, 4T1_MV low, 4T1_sEV low	10	11	15	0	0	0	1	1	0	1	1	2
809	Transient receptor potential cation channel subfamily V member 4 OS=Mus musculus OX=10090 GN=Trpv4 PE=1 SV=1	Q9EPK8	Trpv4	98 kDa		0.047	1_4T1_cell low, 4T1_MV high, 4T1_sEV high	2	1	1	0	0	0	7	7	0	3	5	4
810	Protein-glutamine gamma-glutamyltransferase 2 OS=Mus musculus OX=10090 GN=Tgm2 PE=1 SV=4	P21981	Tgm2	77 kDa		0.017	1_4T1_cell high, 4T1_MV low, 4T1_sEV low	14	16	4	0	0	0	2	1	0	1	1	0
811	Galactokinase OS=Mus musculus OX=10090 GN=Galk1 PE=1 SV=2	Q9R0N0	Galk1	42 kDa		0.00057	1_4T1_cell high, 4T1_MV low, 4T1_sEV low	14	13	10	0	0	0	2	2	0	1	1	2
812	Catalase OS=Mus musculus OX=10090 GN=Cat PE=1 SV=4	P24270	Cat	60 kDa	TRUE	0.27	[]	9	7	10	1	1	3	1	1	0	0	0	0
813	Cytochrome c, somatic OS=Mus musculus OX=10090 GN=Cycs PE=1 SV=2	P62897	Cycs	12 kDa	TRUE	0.00046	1_4T1_cell high, 4T1_MV low, 4T1_sEV low	9	9	11	4	3	1	3	3	0	0	0	0
814	Glutaminase kidney isoform, mitochondrial OS=Mus musculus OX=10090 GN=Gls PE=1 SV=1	D3Z7P3	Gls	74 kDa		0.0022	1_4T1_cell high, 4T1_MV low, 4T1_sEV low	10	9	15	1	1	1	0	1	0	0	0	0
815	Aminoacyl tRNA synthase complex-interacting multifunctional protein 1 OS=Mus musculus OX=10090 GN=Aimp1 PE=1 SV=2	P31230	Aimp1	34 kDa		< 0.00010	1_4T1_cell high, 4T1_MV low, 4T1_sEV low	10	10	13	0	0	0	1	1	0	0	2	0
816	Transaldolase OS=Mus musculus OX=10090 GN=Taldo1 PE=1 SV=2	Q93092	Taldo1	37 kDa		0.00086	1_4T1_cell high, 4T1_MV low, 4T1_sEV low	9	8	10	0	1	0	3	2	0	0	0	0
817	Cullin-4A OS=Mus musculus OX=10090 GN=Cul4a PE=1 SV=1	Q3TCH7	Cul4a	88 kDa	TRUE	0.00014	1_4T1_cell high, 4T1_MV low, 4T1_sEV low	12	15	10	0	0	0	0	1	0	0	0	1
818	Epidermal growth factor receptor substrate 15-like 1 OS=Mus musculus OX=10090 GN=Eps15l1 PE=1 SV=3	Q60902	Eps15l1	99 kDa		< 0.00010	1_4T1_cell high, 4T1_MV low, 4T1_sEV low	9	13	12	0	0	0	1	1	0	0	0	0
819	3-hydroxyacyl-CoA dehydrogenase type-2 OS=Mus musculus OX=10090 GN=Hsd17b10 PE=1 SV=4	O08756	Hsd17b10	27 kDa		< 0.00010	1_4T1_cell high, 4T1_MV low, 4T1_sEV low	12	13	15	0	0	0	0	1	0	0	0	0
820	Phosphoenolpyruvate carboxykinase [GTP], mitochondrial OS=Mus musculus OX=10090 GN=Pck2 PE=1 SV=1	Q8BH04	Pck2	71 kDa		0.00069	1_4T1_cell high, 4T1_MV low, 4T1_sEV low	17	13	9	0	0	0	0	0	0	0	0	0
821	von Willebrand factor A domain-containing protein 5A OS=Mus musculus OX=10090 GN=Vwa5a PE=1 SV=2	Q99KC8	Vwa5a	87 kDa		0.42	[]	8	6	8	1	2	0	3	5	0	2	2	2
822	Ras-related protein Rab-34 OS=Mus musculus OX=10090 GN=Rab34 PE=1 SV=2	Q64008	Rab34	29 kDa		< 0.00010	1_4T1_cell low, 4T1_MV high, 4T1_sEV high	1	2	2	0	0	0	7	4	3	6	8	7
823	Cytochrome c oxidase subunit 4 isoform 1, mitochondrial OS=Mus musculus OX=10090 GN=Cox4i1 PE=1 SV=2	P19783	Cox4i1	20 kDa		0.0072	1_4T1_cell high, 4T1_MV low, 4T1_sEV low	7	7	2	5	4	3	2	1	0	0	0	0
824	40S ribosomal protein S14 OS=Mus musculus OX=10090 GN=Rps14 PE=1 SV=3	P62264	Rps14	16 kDa		< 0.00010	1_4T1_cell high, 4T1_MV low, 4T1_sEV low	10	11	12	0	0	0	2	2	1	1	1	2
825	Adenylosuccinate lyase OS=Mus musculus OX=10090 GN=Adsl PE=1 SV=2	P54822	Adsl	55 kDa		0.00052	1_4T1_cell high, 4T1_MV low, 4T1_sEV low	8	8	15	0	0	0	2	2	0	0	1	1
826	Rabankyrin-5 OS=Mus musculus OX=10090 GN=Ankfy1 PE=1 SV=2	Q810B6	Ankfy1	129 kDa		< 0.00010	1_4T1_cell high, 4T1_MV low, 4T1_sEV low	6	8	6	0	0	0	0	1	0	0	0	0
827	Cytoplasmic dynein 1 intermediate chain 2 OS=Mus musculus OX=10090 GN=Dync1i2 PE=1 SV=1	O88487	Dync1i2	68 kDa		0.00058	1_4T1_cell high, 4T1_MV low, 4T1_sEV low	9	12	14	1	0	0	3	2	0	0	0	1
828	Erlin-2 OS=Mus musculus OX=10090 GN=Erlin2 PE=1 SV=1	Q8BFZ9	Erlin2	38 kDa	TRUE	0.012	1_4T1_cell high, 4T1_MV low, 4T1_sEV low	8	9	4	4	4	3	0	1	0	0	0	0
829	Ubiquitin-conjugating enzyme E2 K OS=Mus musculus OX=10090 GN=Ube2k PE=1 SV=3	P61087	Ube2k	22 kDa		0.00039	1_4T1_cell high, 4T1_MV low, 4T1_sEV low	8	12	11	0	0	0	2	2	0	0	2	1
830	Cytoplasmic dynein 1 light intermediate chain 1 OS=Mus musculus OX=10090 GN=Dync1li1 PE=1 SV=1	Q8R1Q8	Dync1li1	57 kDa	TRUE	0.088	[]	7	8	9	0	0	0	2	1	0	0	1	5
831	DBH-like monooxygenase protein 1 OS=Mus musculus OX=10090 GN=Moxd1 PE=1 SV=1	Q9CXI3	Moxd1	70 kDa		< 0.00010	1_4T1_cell low, 4T1_MV high, 4T1_sEV high	0	0	0	0	0	0	5	8	3	7	9	5
832	Plakophilin-2 OS=Mus musculus OX=10090 GN=Pkp2 PE=1 SV=1	PKP2_MOUSE	Pkp2	?	TRUE	0.2	[]	4	4	0	0	0	0	9	6	0	8	10	0
833	Isovaleryl-CoA dehydrogenase, mitochondrial OS=Mus musculus OX=10090 GN=Ivd PE=1 SV=1	Q9JHI5	Ivd	46 kDa		< 0.00010	1_4T1_cell high, 4T1_MV low, 4T1_sEV low	5	5	3	11	13	2	0	0	0	0	0	0
834	Mitochondrial carrier homolog 2 OS=Mus musculus OX=10090 GN=Mtch2 PE=1 SV=1	Q791V5	Mtch2	33 kDa		0.0012	1_4T1_cell high, 4T1_MV low, 4T1_sEV low	6	5	9	3	9	2	0	0	0	0	0	0
835	Importin subunit alpha-4 OS=Mus musculus OX=10090 GN=Kpna3 PE=1 SV=1	O35344	Kpna3	58 kDa	TRUE	< 0.00010	1_4T1_cell high, 4T1_MV low, 4T1_sEV low	12	10	15	0	0	0	2	3	0	0	0	0
836	Periplakin OS=Mus musculus OX=10090 GN=Ppl PE=1 SV=1	Q9R269	Ppl	204 kDa		< 0.00010	1_4T1_cell high, 4T1_MV low, 4T1_sEV low	10	13	9	0	0	0	0	0	0	0	0	0
837	ATP synthase subunit O, mitochondrial OS=Mus musculus OX=10090 GN=Atp5po PE=1 SV=1	Q9DB20	Atp5po	23 kDa		< 0.00010	1_4T1_cell high, 4T1_MV low, 4T1_sEV low	12	15	11	0	0	0	0	0	0	0	0	0
838	Insulin-like growth factor-binding protein 7 OS=Mus musculus OX=10090 GN=Igfbp7 PE=1 SV=3	Q61581	Igfbp7	29 kDa		0.0063	1_4T1_cell low, 4T1_MV low, 4T1_sEV high	1	2	0	7	7	1	4	1	1	2	7	2
839	60S ribosomal protein L23 OS=Mus musculus OX=10090 GN=Rpl23 PE=1 SV=1	P62830	Rpl23	15 kDa		0.0024	1_4T1_cell high, 4T1_MV low, 4T1_sEV low	9	9	13	0	1	0	2	2	0	1	2	3
840	Sodium-coupled neutral amino acid transporter 2 OS=Mus musculus OX=10090 GN=Slc38a2 PE=1 SV=1	Q8CFE6	Slc38a2	56 kDa		0.0088	1_4T1_cell low, 4T1_MV low, 4T1_sEV high	0	0	0	2	2	1	3	2	2	6	8	12
841	Desmoplakin OS=Mus musculus OX=10090 GN=Dsp PE=1 SV=1	E9Q557	Dsp	333 kDa		0.32	[]	1	2	5	3	4	0	5	6	0	0	2	0
842	Calcyclin-binding protein OS=Mus musculus OX=10090 GN=Cacybp PE=1 SV=1	Q9CXW3	Cacybp	27 kDa		0.007	1_4T1_cell high, 4T1_MV low, 4T1_sEV low	6	7	11	1	2	0	2	1	0	0	0	0
843	Signal recognition particle receptor subunit alpha OS=Mus musculus OX=10090 GN=Srpra PE=1 SV=1	Q9DBG7	Srpra	70 kDa		0.032	1_4T1_cell high, 4T1_MV low, 4T1_sEV low	7	10	11	3	5	0	0	0	0	0	0	0
844	Caprin-1 OS=Mus musculus OX=10090 GN=Caprin1 PE=1 SV=2	Q60865	Caprin1	78 kDa		< 0.00010	1_4T1_cell high, 4T1_MV low, 4T1_sEV low	10	12	15	0	0	0	2	2	0	0	0	0
845	Nucleosome assembly protein 1-like 4 OS=Mus musculus OX=10090 GN=Nap1l4 PE=1 SV=1	Q78ZA7	Nap1l4	43 kDa	TRUE	0.00035	1_4T1_cell high, 4T1_MV low, 4T1_sEV low	12	13	10	0	0	0	3	3	0	0	0	0
846	IgE-binding protein OS=Mus musculus OX=10090 GN=Iap PE=2 SV=1	P03975	Iap	63 kDa		0.018	1_4T1_cell high, 4T1_MV low, 4T1_sEV low	6	8	23	0	0	0	1	3	0	0	0	0
847	Protein transport protein Sec23B OS=Mus musculus OX=10090 GN=Sec23b PE=1 SV=1	Q9D662	Sec23b	86 kDa	TRUE	< 0.00010	1_4T1_cell high, 4T1_MV low, 4T1_sEV low	10	14	11	0	0	0	1	1	0	0	0	0
848	ATP synthase subunit d, mitochondrial OS=Mus musculus OX=10090 GN=Atp5pd PE=1 SV=3	Q9DCX2	Atp5pd	19 kDa		0.00055	1_4T1_cell high, 4T1_MV low, 4T1_sEV low	11	12	9	0	0	0	0	3	0	0	0	0
849	Lamina-associated polypeptide 2, isoforms alpha/zeta OS=Mus musculus OX=10090 GN=Tmpo PE=1 SV=4	Q61033	Tmpo	75 kDa	TRUE	< 0.00010	1_4T1_cell high, 4T1_MV low, 4T1_sEV low	10	12	17	0	0	0	0	0	0	0	0	0
850	Sortilin-related receptor OS=Mus musculus OX=10090 GN=Sorl1 PE=1 SV=3	O88307	Sorl1	247 kDa		0.058	[]	0	0	0	14	22	0	0	0	0	0	0	0
851	Endonuclease domain-containing 1 protein OS=Mus musculus OX=10090 GN=Endod1 PE=1 SV=2	Q8C522	Endod1	55 kDa		0.2	[]	8	8	10	1	1	1	3	5	1	1	1	2
852	AP-2 complex subunit mu OS=Mus musculus OX=10090 GN=Ap2m1 PE=1 SV=1	P84091	Ap2m1	50 kDa		0.021	1_4T1_cell low, 4T1_MV low, 4T1_sEV high	2	3	4	0	0	0	1	2	1	4	5	1
853	60S ribosomal protein L13a OS=Mus musculus OX=10090 GN=Rpl13a PE=1 SV=4	P19253	Rpl13a	23 kDa		0.039	1_4T1_cell high, 4T1_MV low, 4T1_sEV low	6	6	15	0	1	0	1	2	0	1	1	3
854	1-phosphatidylinositol 4,5-bisphosphate phosphodiesterase delta-3 OS=Mus musculus OX=10090 GN=Plcd3 PE=1 SV=2	Q8K2J0	Plcd3	89 kDa		0.19	[]	0	1	0	2	0	0	7	8	0	5	8	1
855	Bleomycin hydrolase OS=Mus musculus OX=10090 GN=Blmh PE=1 SV=1	Q8R016	Blmh	53 kDa		0.093	[]	6	4	10	3	4	0	2	1	0	0	0	0
856	Eukaryotic translation initiation factor 5 OS=Mus musculus OX=10090 GN=Eif5 PE=1 SV=1	P59325	Eif5	49 kDa		< 0.00010	1_4T1_cell high, 4T1_MV low, 4T1_sEV low	8	11	14	0	0	0	1	1	0	1	1	0
857	Probable ATP-dependent RNA helicase DDX6 OS=Mus musculus OX=10090 GN=Ddx6 PE=1 SV=1	P54823	Ddx6	54 kDa		0.00037	1_4T1_cell high, 4T1_MV low, 4T1_sEV low	10	11	13	0	0	0	1	3	0	0	1	2
858	Phosphatidylinositol transfer protein beta isoform OS=Mus musculus OX=10090 GN=Pitpnb PE=1 SV=2	P53811	Pitpnb	31 kDa	TRUE	0.043	1_4T1_cell high, 4T1_MV high, 4T1_sEV low	8	7	10	1	0	0	3	1	4	0	0	0
859	Transmembrane protein 43 OS=Mus musculus OX=10090 GN=Tmem43 PE=1 SV=1	Q9DBS1	Tmem43	45 kDa		< 0.00010	1_4T1_cell high, 4T1_MV low, 4T1_sEV low	3	3	3	16	14	3	0	0	0	0	0	0
860	Sister chromatid cohesion protein PDS5 homolog A OS=Mus musculus OX=10090 GN=Pds5a PE=1 SV=3	Q6A026	Pds5a	150 kDa	TRUE	< 0.00010	1_4T1_cell high, 4T1_MV low, 4T1_sEV low	8	7	12	0	0	0	0	0	0	0	0	0
861	Signal recognition particle receptor subunit beta OS=Mus musculus OX=10090 GN=Srprb PE=1 SV=1	P47758	Srprb	30 kDa		0.00029	1_4T1_cell high, 4T1_MV low, 4T1_sEV low	5	5	6	11	7	4	0	0	0	0	0	0
862	Vesicular integral-membrane protein VIP36 OS=Mus musculus OX=10090 GN=Lman2 PE=1 SV=2	Q9DBH5	Lman2	40 kDa		0.0038	1_4T1_cell high, 4T1_MV low, 4T1_sEV low	5	5	7	10	10	1	0	0	0	0	0	0
863	ATP synthase subunit gamma, mitochondrial OS=Mus musculus OX=10090 GN=Atp5f1c PE=1 SV=1	Q91VR2	Atp5f1c	33 kDa		< 0.00010	1_4T1_cell high, 4T1_MV low, 4T1_sEV low	11	13	12	0	0	0	2	1	0	0	0	0
864	1-phosphatidylinositol 4,5-bisphosphate phosphodiesterase gamma-2 OS=Mus musculus OX=10090 GN=Plcg2 PE=1 SV=1	Q8CIH5	Plcg2	148 kDa	TRUE	0.0013	1_4T1_cell high, 4T1_MV low, 4T1_sEV low	11	13	6	0	0	0	0	1	0	0	0	0
865	Apoptosis inhibitor 5 OS=Mus musculus OX=10090 GN=Api5 PE=1 SV=2	O35841	Api5	57 kDa		< 0.00010	1_4T1_cell high, 4T1_MV low, 4T1_sEV low	13	11	12	0	0	0	0	0	0	0	0	0
866	Lamina-associated polypeptide 2, isoforms beta/delta/epsilon/gamma OS=Mus musculus OX=10090 GN=Tmpo PE=1 SV=4	Q61029	Tmpo	50 kDa	TRUE	< 0.00010	1_4T1_cell high, 4T1_MV low, 4T1_sEV low	10	14	16	0	0	0	0	0	0	0	0	0
867	Ubiquitin carboxyl-terminal hydrolase 7 OS=Mus musculus OX=10090 GN=Usp7 PE=1 SV=1	Q6A4J8	Usp7	128 kDa		< 0.00010	1_4T1_cell high, 4T1_MV low, 4T1_sEV low	11	11	13	0	0	0	0	0	0	0	0	0
868	Cyclin-dependent kinase 4 OS=Mus musculus OX=10090 GN=Cdk4 PE=1 SV=1	P30285	Cdk4	34 kDa	TRUE	0.0011	1_4T1_cell high, 4T1_MV low, 4T1_sEV low	3	6	10	0	0	0	0	0	0	0	0	0
869	Alpha-parvin OS=Mus musculus OX=10090 GN=Parva PE=1 SV=1	Q9EPC1	Parva	42 kDa	TRUE	< 0.00010	1_4T1_cell low, 4T1_MV low, 4T1_sEV high	5	3	8	0	0	0	4	4	2	5	5	4
870	GTPase NRas OS=Mus musculus OX=10090 GN=Nras PE=1 SV=1	P08556	Nras	21 kDa	TRUE	0.019	1_4T1_cell low, 4T1_MV high, 4T1_sEV high	1	1	3	0	0	0	3	4	6	6	6	8
871	SLIT-ROBO Rho GTPase-activating protein 2 OS=Mus musculus OX=10090 GN=Srgap2 PE=1 SV=2	Q91Z67	Srgap2	121 kDa		< 0.00010	1_4T1_cell low, 4T1_MV high, 4T1_sEV high	2	2	1	0	0	0	6	5	2	7	8	4
872	N(G),N(G)-dimethylarginine dimethylaminohydrolase 1 OS=Mus musculus OX=10090 GN=Ddah1 PE=1 SV=3	Q9CWS0	Ddah1	31 kDa	TRUE	< 0.00010	1_4T1_cell high, 4T1_MV high, 4T1_sEV low	7	5	9	0	0	0	6	6	3	1	1	1
873	Cell surface glycoprotein MUC18 OS=Mus musculus OX=10090 GN=Mcam PE=1 SV=1	Q8R2Y2	Mcam	72 kDa		0.11	[]	0	0	0	5	5	0	3	4	1	5	5	3
874	Histone-binding protein RBBP7 OS=Mus musculus OX=10090 GN=Rbbp7 PE=1 SV=1	Q60973	Rbbp7	48 kDa	TRUE	0.017	1_4T1_cell high, 4T1_MV low, 4T1_sEV low	7	7	13	0	2	0	0	1	0	1	0	2
875	Ras GTPase-activating protein 3 OS=Mus musculus OX=10090 GN=Rasa3 PE=1 SV=2	Q60790	Rasa3	96 kDa		0.21	[]	0	0	2	0	1	0	12	7	0	8	5	0
876	60S ribosomal protein L23a OS=Mus musculus OX=10090 GN=Rpl23a PE=1 SV=1	P62751	Rpl23a	18 kDa		0.00045	1_4T1_cell high, 4T1_MV low, 4T1_sEV low	8	10	14	0	0	0	3	3	0	0	1	0
877	Extended synaptotagmin-1 OS=Mus musculus OX=10090 GN=Esyt1 PE=1 SV=2	Q3U7R1	Esyt1	122 kDa		< 0.00010	1_4T1_cell high, 4T1_MV low, 4T1_sEV low	8	9	16	0	0	0	3	2	1	0	0	0
878	Splicing factor, proline- and glutamine-rich OS=Mus musculus OX=10090 GN=Sfpq PE=1 SV=1	Q8VIJ6	Sfpq	75 kDa	TRUE	0.00078	1_4T1_cell high, 4T1_MV low, 4T1_sEV low	10	6	17	0	0	0	0	0	0	0	1	0
879	Leukotriene A-4 hydrolase OS=Mus musculus OX=10090 GN=Lta4h PE=1 SV=4	P24527	Lta4h	69 kDa		0.00021	1_4T1_cell high, 4T1_MV low, 4T1_sEV low	9	12	10	0	0	0	2	3	0	0	0	0
880	60S ribosomal protein L38 OS=Mus musculus OX=10090 GN=Rpl38 PE=1 SV=3	Q9JJI8	Rpl38	8 kDa		0.00089	1_4T1_cell high, 4T1_MV low, 4T1_sEV low	6	10	16	0	0	0	2	2	0	0	0	0
881	Fragile X mental retardation syndrome-related protein 1 OS=Mus musculus OX=10090 GN=Fxr1 PE=1 SV=2	Q61584	Fxr1	76 kDa	TRUE	< 0.00010	1_4T1_cell high, 4T1_MV low, 4T1_sEV low	10	11	15	0	0	0	1	0	0	0	0	1
882	Proteasome activator complex subunit 2 OS=Mus musculus OX=10090 GN=Psme2 PE=1 SV=4	P97372	Psme2	27 kDa		0.00018	1_4T1_cell high, 4T1_MV low, 4T1_sEV low	10	13	9	0	0	0	0	2	0	0	0	0
883	Calcium-binding mitochondrial carrier protein SCaMC-1 OS=Mus musculus OX=10090 GN=Slc25a24 PE=1 SV=1	Q8BMD8	Slc25a24	53 kDa		< 0.00010	1_4T1_cell high, 4T1_MV low, 4T1_sEV low	9	14	10	0	0	0	0	0	0	0	1	0
884	Atlastin-3 OS=Mus musculus OX=10090 GN=Atl3 PE=1 SV=1	Q91YH5	Atl3	61 kDa		< 0.00010	1_4T1_cell high, 4T1_MV low, 4T1_sEV low	12	12	10	0	0	0	0	0	0	0	0	0
885	SUMO-activating enzyme subunit 1 OS=Mus musculus OX=10090 GN=Sae1 PE=1 SV=1	Q9R1T2	Sae1	39 kDa		< 0.00010	1_4T1_cell high, 4T1_MV low, 4T1_sEV low	13	13	10	0	0	0	0	0	0	0	0	0
886	Structural maintenance of chromosomes flexible hinge domain-containing protein 1 OS=Mus musculus OX=10090 GN=Smchd1 PE=1 SV=2	Q6P5D8	Smchd1	226 kDa		< 0.00010	1_4T1_cell high, 4T1_MV low, 4T1_sEV low	8	9	16	0	0	0	0	0	0	0	0	0
887	Poly(U)-binding-splicing factor PUF60 OS=Mus musculus OX=10090 GN=Puf60 PE=1 SV=2	Q3UEB3	Puf60	60 kDa		< 0.00010	1_4T1_cell high, 4T1_MV low, 4T1_sEV low	14	13	14	0	0	0	0	0	0	0	0	0
888	Endoglin OS=Mus musculus OX=10090 GN=Eng PE=1 SV=2	Q63961	Eng	70 kDa		< 0.00010	1_4T1_cell low, 4T1_MV high, 4T1_sEV high	0	0	0	7	11	2	3	2	2	2	4	2
889	Spermidine synthase OS=Mus musculus OX=10090 GN=Srm PE=1 SV=1	Q64674	Srm	34 kDa		0.023	1_4T1_cell high, 4T1_MV high, 4T1_sEV low	6	9	12	0	0	0	3	2	3	0	1	3
890	60S ribosomal protein L24 OS=Mus musculus OX=10090 GN=Rpl24 PE=1 SV=2	Q8BP67	Rpl24	18 kDa		0.0069	1_4T1_cell high, 4T1_MV low, 4T1_sEV low	8	8	10	0	0	0	3	3	0	1	2	3
891	Glycogen phosphorylase, brain form OS=Mus musculus OX=10090 GN=Pygb PE=1 SV=3	Q8CI94	Pygb	97 kDa		0.01	1_4T1_cell high, 4T1_MV low, 4T1_sEV low	7	10	9	0	0	0	2	2	0	0	1	3
892	Cytochrome c1, heme protein, mitochondrial OS=Mus musculus OX=10090 GN=Cyc1 PE=1 SV=1	Q9D0M3	Cyc1	35 kDa		0.0041	1_4T1_cell high, 4T1_MV low, 4T1_sEV low	5	8	7	3	3	2	0	0	0	0	0	0
893	Anillin OS=Mus musculus OX=10090 GN=Anln PE=1 SV=2	Q8K298	Anln	123 kDa		0.056	[]	5	6	15	0	0	0	6	6	0	0	1	0
894	Developmentally-regulated GTP-binding protein 1 OS=Mus musculus OX=10090 GN=Drg1 PE=1 SV=1	P32233	Drg1	41 kDa	TRUE	0.00054	1_4T1_cell high, 4T1_MV low, 4T1_sEV low	11	9	10	0	0	0	1	3	0	0	0	1
895	ATP-binding cassette sub-family F member 2 OS=Mus musculus OX=10090 GN=Abcf2 PE=1 SV=1	Q99LE6	Abcf2	72 kDa		< 0.00010	1_4T1_cell high, 4T1_MV low, 4T1_sEV low	10	8	11	0	0	0	1	1	0	0	0	1
896	Unconventional myosin-Id OS=Mus musculus OX=10090 GN=Myo1d PE=1 SV=1	Q5SYD0	Myo1d	116 kDa		0.067	[]	0	0	0	0	0	0	11	11	0	3	4	2
897	Sorting and assembly machinery component 50 homolog OS=Mus musculus OX=10090 GN=Samm50 PE=1 SV=1	Q8BGH2	Samm50	52 kDa		0.062	[]	3	2	2	12	12	0	0	0	0	0	0	0
898	Lanosterol synthase OS=Mus musculus OX=10090 GN=Lss PE=1 SV=2	Q8BLN5	Lss	83 kDa		0.0058	1_4T1_cell high, 4T1_MV low, 4T1_sEV low	7	4	1	11	12	1	0	0	0	0	0	0
899	Eukaryotic translation initiation factor 3 subunit H OS=Mus musculus OX=10090 GN=Eif3h PE=1 SV=1	Q91WK2	Eif3h	40 kDa		< 0.00010	1_4T1_cell high, 4T1_MV low, 4T1_sEV low	9	11	16	0	0	0	1	1	0	0	0	1
900	Dynactin subunit 2 OS=Mus musculus OX=10090 GN=Dctn2 PE=1 SV=3	Q99KJ8	Dctn2	44 kDa		< 0.00010	1_4T1_cell high, 4T1_MV low, 4T1_sEV low	11	12	12	0	0	0	2	2	0	0	0	0
901	Isoleucine--tRNA ligase, mitochondrial OS=Mus musculus OX=10090 GN=Iars2 PE=1 SV=1	Q8BIJ6	Iars2	113 kDa		0.00056	1_4T1_cell high, 4T1_MV low, 4T1_sEV low	12	13	8	0	1	0	0	1	0	0	0	0
902	Lanosterol 14-alpha demethylase OS=Mus musculus OX=10090 GN=Cyp51a1 PE=1 SV=1	Q8K0C4	Cyp51a1	57 kDa		< 0.00010	1_4T1_cell high, 4T1_MV low, 4T1_sEV low	8	9	13	1	1	0	0	0	0	0	0	0
903	Ribosomal L1 domain-containing protein 1 OS=Mus musculus OX=10090 GN=Rsl1d1 PE=1 SV=1	Q8BVY0	Rsl1d1	50 kDa		0.0096	1_4T1_cell high, 4T1_MV low, 4T1_sEV low	10	10	19	0	0	1	0	0	0	0	0	0
904	Acidic leucine-rich nuclear phosphoprotein 32 family member A OS=Mus musculus OX=10090 GN=Anp32a PE=1 SV=1	O35381	Anp32a	29 kDa	TRUE	< 0.00010	1_4T1_cell high, 4T1_MV low, 4T1_sEV low	9	9	17	0	0	0	0	0	0	0	0	0
905	Synaptobrevin homolog YKT6 OS=Mus musculus OX=10090 GN=Ykt6 PE=1 SV=1	Q9CQW1	Ykt6	22 kDa		0.65	[]	4	5	5	1	1	1	3	4	2	3	3	0
906	Ferric-chelate reductase 1 OS=Mus musculus OX=10090 GN=FRRS1 PE=1 SV=1	Q8K385	FRRS1	66 kDa		0.075	[]	0	0	1	8	8	0	0	1	0	2	2	1
907	Proteasome subunit beta type-6 OS=Mus musculus OX=10090 GN=Psmb6 PE=1 SV=3	Q60692	Psmb6	25 kDa		0.22	[]	5	7	8	3	3	0	0	3	1	1	0	1
908	MARCKS-related protein OS=Mus musculus OX=10090 GN=Marcksl1 PE=1 SV=2	P28667	Marcksl1	20 kDa		0.11	[]	1	1	2	0	0	0	4	6	10	1	0	5
909	Protein scribble homolog OS=Mus musculus OX=10090 GN=Scrib PE=1 SV=2	Q80U72	Scrib	174 kDa	TRUE	0.16	[]	2	6	3	0	0	0	8	6	0	1	3	1
910	Band 4.1-like protein 5 OS=Mus musculus OX=10090 GN=Epb41l5 PE=1 SV=1	Q8BGS1	Epb41l5	82 kDa		0.026	1_4T1_cell low, 4T1_MV high, 4T1_sEV high	1	3	2	0	0	0	8	5	0	8	8	3
911	Protein NDRG1 OS=Mus musculus OX=10090 GN=Ndrg1 PE=1 SV=1	Q62433	Ndrg1	43 kDa		0.011	1_4T1_cell high, 4T1_MV high, 4T1_sEV low	10	10	3	0	0	0	5	4	3	1	0	2
912	Alcohol dehydrogenase class-3 OS=Mus musculus OX=10090 GN=Adh5 PE=1 SV=3	P28474	Adh5	40 kDa	TRUE	0.00023	1_4T1_cell high, 4T1_MV low, 4T1_sEV low	9	8	13	0	1	0	2	2	0	0	0	0
913	UDP-N-acetylhexosamine pyrophosphorylase-like protein 1 OS=Mus musculus OX=10090 GN=Uap1l1 PE=1 SV=1	Q3TW96	Uap1l1	57 kDa	TRUE	0.0011	1_4T1_cell high, 4T1_MV low, 4T1_sEV low	12	10	8	0	0	0	2	3	0	0	0	0
914	Annexin A8 OS=Mus musculus OX=10090 GN=Anxa8 PE=1 SV=2	O35640	Anxa8	37 kDa		0.0039	1_4T1_cell high, 4T1_MV high, 4T1_sEV low	8	9	8	0	0	0	4	4	0	0	0	0
915	U2 small nuclear ribonucleoprotein A' OS=Mus musculus OX=10090 GN=Snrpa1 PE=1 SV=2	P57784	Snrpa1	28 kDa		< 0.00010	1_4T1_cell high, 4T1_MV low, 4T1_sEV low	10	11	11	0	0	0	0	0	0	1	1	2
916	Tropomodulin-3 OS=Mus musculus OX=10090 GN=Tmod3 PE=1 SV=1	Q9JHJ0	Tmod3	40 kDa	TRUE	0.027	1_4T1_cell high, 4T1_MV high, 4T1_sEV low	8	9	6	0	0	0	3	6	0	0	0	0
917	DNA mismatch repair protein Msh6 OS=Mus musculus OX=10090 GN=Msh6 PE=1 SV=3	P54276	Msh6	151 kDa		0.00074	1_4T1_cell high, 4T1_MV low, 4T1_sEV low	5	11	16	0	0	0	0	0	0	0	0	0
918	Reticulocalbin-2 OS=Mus musculus OX=10090 GN=Rcn2 PE=1 SV=1	Q8BP92	Rcn2	37 kDa		< 0.00010	1_4T1_cell high, 4T1_MV low, 4T1_sEV low	15	15	11	0	0	0	0	0	0	0	0	0
919	Proteasome subunit alpha type-3 OS=Mus musculus OX=10090 GN=Psma3 PE=1 SV=3	O70435	Psma3	28 kDa		0.089	[]	6	7	10	3	3	0	0	1	0	1	1	2
920	Ras-related protein Rab-21 OS=Mus musculus OX=10090 GN=Rab21 PE=1 SV=4	P35282	Rab21	24 kDa		0.15	[]	4	5	4	0	0	0	7	4	0	2	3	4
921	Sorting nexin-9 OS=Mus musculus OX=10090 GN=Snx9 PE=1 SV=1	Q91VH2	Snx9	67 kDa		0.13	[]	5	5	5	0	0	0	5	6	0	1	3	1
922	Syntaxin-binding protein 3 OS=Mus musculus OX=10090 GN=Stxbp3 PE=1 SV=1	Q60770	Stxbp3	68 kDa		0.00029	1_4T1_cell low, 4T1_MV high, 4T1_sEV high	1	1	1	0	0	0	8	4	4	4	4	4
923	Golgin subfamily A member 7 OS=Mus musculus OX=10090 GN=Golga7 PE=1 SV=1	Q91W53	Golga7	16 kDa		0.015	1_4T1_cell low, 4T1_MV high, 4T1_sEV high	0	0	0	2	2	1	6	6	7	5	6	4
924	S-adenosylhomocysteine hydrolase-like protein 1 OS=Mus musculus OX=10090 GN=Ahcyl1 PE=1 SV=1	Q80SW1	Ahcyl1	59 kDa		0.0012	1_4T1_cell low, 4T1_MV high, 4T1_sEV low	7	5	6	0	0	0	5	3	2	3	2	3
925	Serine/threonine-protein kinase 24 OS=Mus musculus OX=10090 GN=Stk24 PE=1 SV=1	Q99KH8	Stk24	48 kDa		0.00032	1_4T1_cell high, 4T1_MV low, 4T1_sEV low	7	8	6	0	0	0	1	2	1	1	1	0
926	Protein kinase C and casein kinase II substrate protein 3 OS=Mus musculus OX=10090 GN=Pacsin3 PE=1 SV=1	Q99JB8	Pacsin3	49 kDa		< 0.00010	1_4T1_cell low, 4T1_MV high, 4T1_sEV high	0	1	1	0	0	0	5	7	4	6	6	5
927	Splicing factor U2AF 65 kDa subunit OS=Mus musculus OX=10090 GN=U2af2 PE=1 SV=3	P26369	U2af2	54 kDa		0.00045	1_4T1_cell high, 4T1_MV low, 4T1_sEV low	8	9	12	0	0	0	2	2	0	2	2	0
928	Glyoxalase domain-containing protein 4 OS=Mus musculus OX=10090 GN=Glod4 PE=1 SV=1	Q9CPV4	Glod4	33 kDa		0.087	[]	7	11	6	4	5	0	1	2	0	0	0	0
929	Peptidyl-prolyl cis-trans isomerase FKBP3 OS=Mus musculus OX=10090 GN=Fkbp3 PE=1 SV=2	Q62446	Fkbp3	25 kDa		0.00037	1_4T1_cell high, 4T1_MV low, 4T1_sEV low	7	8	14	0	0	0	1	0	1	1	1	0
930	4-trimethylaminobutyraldehyde dehydrogenase OS=Mus musculus OX=10090 GN=Aldh9a1 PE=1 SV=1	Q9JLJ2	Aldh9a1	54 kDa		0.053	[]	6	8	9	0	0	0	1	1	0	0	0	4
931	UV excision repair protein RAD23 homolog B OS=Mus musculus OX=10090 GN=Rad23b PE=1 SV=2	P54728	Rad23b	44 kDa	TRUE	0.00051	1_4T1_cell high, 4T1_MV low, 4T1_sEV low	7	9	16	0	1	0	1	1	0	0	0	0
932	Acetoacetyl-CoA synthetase OS=Mus musculus OX=10090 GN=Aacs PE=1 SV=1	Q9D2R0	Aacs	75 kDa		0.0005	1_4T1_cell high, 4T1_MV low, 4T1_sEV low	7	10	7	0	0	0	0	2	0	0	0	0
933	Long-chain specific acyl-CoA dehydrogenase, mitochondrial OS=Mus musculus OX=10090 GN=Acadl PE=1 SV=2	P51174	Acadl	48 kDa		0.00014	1_4T1_cell high, 4T1_MV low, 4T1_sEV low	11	13	9	0	0	0	1	2	0	0	0	0
934	Long-chain-fatty-acid--CoA ligase 5 OS=Mus musculus OX=10090 GN=Acsl5 PE=1 SV=1	Q8JZR0	Acsl5	76 kDa	TRUE	0.00015	1_4T1_cell high, 4T1_MV low, 4T1_sEV low	12	11	8	0	0	0	0	1	0	0	0	0
935	Geranylgeranyl transferase type-2 subunit alpha OS=Mus musculus OX=10090 GN=Rabggta PE=1 SV=1	Q9JHK4	Rabggta	65 kDa		< 0.00010	1_4T1_cell high, 4T1_MV low, 4T1_sEV low	10	14	9	0	0	0	0	0	0	0	0	0
936	Heat shock 70 kDa protein 4L OS=Mus musculus OX=10090 GN=Hspa4l PE=1 SV=2	P48722	Hspa4l	94 kDa	TRUE	0.00028	1_4T1_cell high, 4T1_MV low, 4T1_sEV low	10	10	6	0	0	0	0	0	0	0	0	0
937	RNA cytidine acetyltransferase OS=Mus musculus OX=10090 GN=Nat10 PE=1 SV=1	Q8K224	Nat10	115 kDa		0.00034	1_4T1_cell high, 4T1_MV low, 4T1_sEV low	9	8	19	0	0	0	0	0	0	0	0	0
938	Hexokinase-1 OS=Mus musculus OX=10090 GN=Hk1 PE=1 SV=3	P17710	Hk1	108 kDa	TRUE	0.00096	1_4T1_cell high, 4T1_MV low, 4T1_sEV low	8	9	21	0	0	0	0	0	0	0	0	0
939	Podocalyxin OS=Mus musculus OX=10090 GN=Podxl PE=1 SV=2	Q9R0M4	Podxl	53 kDa		0.43	[]	3	3	2	1	1	0	2	4	2	1	2	7
940	60S ribosomal protein L27a OS=Mus musculus OX=10090 GN=Rpl27a PE=1 SV=5	P14115	Rpl27a	17 kDa		0.016	1_4T1_cell high, 4T1_MV low, 4T1_sEV high	5	6	11	0	0	0	1	3	0	2	3	4
941	Complement component 1 Q subcomponent-binding protein, mitochondrial OS=Mus musculus OX=10090 GN=C1qbp PE=1 SV=1	O35658	C1qbp	31 kDa		0.11	[]	6	7	2	7	9	0	2	2	0	0	0	1
942	Sodium- and chloride-dependent taurine transporter OS=Mus musculus OX=10090 GN=Slc6a6 PE=1 SV=2	O35316	Slc6a6	70 kDa	TRUE	0.011	1_4T1_cell low, 4T1_MV high, 4T1_sEV high	0	0	0	0	0	0	3	4	4	5	3	7
943	Gap junction beta-3 protein OS=Mus musculus OX=10090 GN=Gjb3 PE=1 SV=1	P28231	Gjb3	31 kDa		0.0027	1_4T1_cell low, 4T1_MV high, 4T1_sEV high	0	0	0	0	0	0	4	4	5	6	8	4
944	Syndecan-4 OS=Mus musculus OX=10090 GN=Sdc4 PE=1 SV=1	O35988	Sdc4	21 kDa		0.046	1_4T1_cell low, 4T1_MV high, 4T1_sEV high	0	0	0	0	0	0	3	5	5	5	5	13
945	Dynactin subunit 1 OS=Mus musculus OX=10090 GN=Dctn1 PE=1 SV=3	O08788	Dctn1	142 kDa		< 0.00010	1_4T1_cell high, 4T1_MV low, 4T1_sEV low	10	12	11	0	0	0	1	1	0	0	0	0
946	26S proteasome non-ATPase regulatory subunit 4 OS=Mus musculus OX=10090 GN=Psmd4 PE=1 SV=1	O35226	Psmd4	41 kDa		0.00018	1_4T1_cell high, 4T1_MV low, 4T1_sEV low	9	13	9	0	0	0	2	1	0	0	0	0
947	Renin receptor OS=Mus musculus OX=10090 GN=Atp6ap2 PE=1 SV=2	Q9CYN9	Atp6ap2	39 kDa		0.082	[]	0	0	0	0	0	0	4	4	0	12	16	0
948	Electron transfer flavoprotein subunit alpha, mitochondrial OS=Mus musculus OX=10090 GN=Etfa PE=1 SV=2	Q99LC5	Etfa	35 kDa		< 0.00010	1_4T1_cell high, 4T1_MV low, 4T1_sEV low	11	13	9	0	0	0	0	0	0	0	0	0
949	Protein phosphatase 1G OS=Mus musculus OX=10090 GN=Ppm1g PE=1 SV=3	Q61074	Ppm1g	59 kDa		< 0.00010	1_4T1_cell high, 4T1_MV low, 4T1_sEV low	7	10	16	0	0	0	0	0	0	0	0	0
950	5'-3' exoribonuclease 2 OS=Mus musculus OX=10090 GN=Xrn2 PE=1 SV=1	Q9DBR1	Xrn2	109 kDa		< 0.00010	1_4T1_cell high, 4T1_MV low, 4T1_sEV low	10	10	11	0	0	0	0	0	0	0	0	0
951	Beta-2-syntrophin OS=Mus musculus OX=10090 GN=Sntb2 PE=1 SV=2	Q61235	Sntb2	56 kDa		0.53	[]	2	5	3	1	2	0	5	5	0	3	3	3
952	60S ribosomal protein L27 OS=Mus musculus OX=10090 GN=Rpl27 PE=1 SV=2	P61358	Rpl27	16 kDa		0.062	[]	4	7	9	0	1	0	2	1	2	1	2	2
953	cAMP-dependent protein kinase catalytic subunit alpha OS=Mus musculus OX=10090 GN=Prkaca PE=1 SV=3	P05132	Prkaca	41 kDa	TRUE	0.011	1_4T1_cell high, 4T1_MV low, 4T1_sEV low	9	6	8	0	0	0	3	3	0	1	1	2
954	Dolichyl-diphosphooligosaccharide--protein glycosyltransferase subunit STT3A OS=Mus musculus OX=10090 GN=Stt3a PE=1 SV=1	P46978	Stt3a	81 kDa	TRUE	0.091	[]	3	4	10	3	3	0	0	1	0	0	0	0
955	Eukaryotic translation initiation factor 3 subunit M OS=Mus musculus OX=10090 GN=Eif3m PE=1 SV=1	Q99JX4	Eif3m	43 kDa		0.0035	1_4T1_cell high, 4T1_MV low, 4T1_sEV low	8	6	10	0	0	0	2	2	0	1	0	2
956	Neutral ceramidase OS=Mus musculus OX=10090 GN=Asah2 PE=1 SV=1	Q9JHE3	Asah2	84 kDa		0.032	1_4T1_cell low, 4T1_MV low, 4T1_sEV high	0	0	0	5	7	0	0	1	0	7	6	8
957	Mitochondrial 2-oxoglutarate/malate carrier protein OS=Mus musculus OX=10090 GN=Slc25a11 PE=1 SV=3	Q9CR62	Slc25a11	34 kDa		0.081	[]	8	8	5	7	6	0	0	0	0	0	0	0
958	Phosphoglucomutase-2 OS=Mus musculus OX=10090 GN=Pgm2 PE=1 SV=1	Q7TSV4	Pgm2	69 kDa		0.00063	1_4T1_cell high, 4T1_MV low, 4T1_sEV low	9	13	7	0	0	0	1	1	0	0	0	0
959	DNA repair protein RAD50 OS=Mus musculus OX=10090 GN=Rad50 PE=1 SV=1	P70388	Rad50	153 kDa		0.001	1_4T1_cell high, 4T1_MV low, 4T1_sEV low	6	9	15	0	0	0	0	0	1	1	0	0
960	Inositol 1,4,5-trisphosphate receptor type 3 OS=Mus musculus OX=10090 GN=Itpr3 PE=1 SV=3	P70227	Itpr3	304 kDa	TRUE	0.019	1_4T1_cell high, 4T1_MV low, 4T1_sEV low	9	6	3	0	0	0	0	0	1	0	0	0
961	SWI/SNF-related matrix-associated actin-dependent regulator of chromatin subfamily A member 5 OS=Mus musculus OX=10090 GN=Smarca5 PE=1 SV=1	Q91ZW3	Smarca5	122 kDa		0.055	[]	5	3	20	0	0	0	0	0	0	0	0	0
962	Eukaryotic translation initiation factor 3 subunit G OS=Mus musculus OX=10090 GN=Eif3g PE=1 SV=2	Q9Z1D1	Eif3g	36 kDa		< 0.00010	1_4T1_cell high, 4T1_MV low, 4T1_sEV low	8	8	13	0	0	0	0	0	0	0	0	0
963	Enhancer of mRNA-decapping protein 4 OS=Mus musculus OX=10090 GN=Edc4 PE=1 SV=2	Q3UJB9	Edc4	152 kDa		0.00034	1_4T1_cell high, 4T1_MV low, 4T1_sEV low	12	12	7	0	0	0	0	0	0	0	0	0
964	Coatomer subunit gamma-2 OS=Mus musculus OX=10090 GN=Copg2 PE=1 SV=1	Q9QXK3	Copg2	98 kDa	TRUE	< 0.00010	1_4T1_cell high, 4T1_MV low, 4T1_sEV low	10	11	9	0	0	0	0	0	0	0	0	0
965	Pregnancy zone protein OS=Mus musculus OX=10090 GN=Pzp PE=1 SV=3	Q61838	Pzp	166 kDa	TRUE	0.45	[]	0	0	0	0	0	19	0	0	0	2	0	3
966	Delta-aminolevulinic acid dehydratase OS=Mus musculus OX=10090 GN=Alad PE=1 SV=1	P10518	Alad	36 kDa		0.066	[]	6	8	8	3	3	0	2	2	0	0	0	0
967	Integrin-linked protein kinase OS=Mus musculus OX=10090 GN=Ilk PE=1 SV=2	O55222	Ilk	51 kDa		0.088	[]	0	2	3	0	0	0	6	4	0	6	6	1
968	Purine nucleoside phosphorylase OS=Mus musculus OX=10090 GN=Pnp PE=1 SV=2	P23492	Pnp	32 kDa		0.17	[]	5	5	10	3	3	0	3	4	0	0	0	0
969	Heterochromatin protein 1-binding protein 3 OS=Mus musculus OX=10090 GN=Hp1bp3 PE=1 SV=1	Q3TEA8	Hp1bp3	61 kDa		0.005	1_4T1_cell low, 4T1_MV low, 4T1_sEV high	6	5	7	0	0	0	0	1	0	5	4	8
970	Shootin-1 OS=Mus musculus OX=10090 GN=Shtn1 PE=1 SV=1	Q8K2Q9	Shtn1	71 kDa		0.00011	1_4T1_cell high, 4T1_MV low, 4T1_sEV low	10	8	10	1	1	0	0	1	0	0	0	0
971	Prosaposin OS=Mus musculus OX=10090 GN=Psap PE=1 SV=2	Q61207	Psap	61 kDa		0.0084	1_4T1_cell high, 4T1_MV low, 4T1_sEV low	1	1	2	14	14	1	0	0	0	0	0	0
972	AP-1 complex subunit gamma-1 OS=Mus musculus OX=10090 GN=Ap1g1 PE=1 SV=3	P22892	Ap1g1	91 kDa		0.00019	1_4T1_cell high, 4T1_MV low, 4T1_sEV low	7	8	6	0	0	0	1	1	0	0	1	0
973	Mitochondrial proton/calcium exchanger protein OS=Mus musculus OX=10090 GN=Letm1 PE=1 SV=1	Q9Z2I0	Letm1	83 kDa		0.0076	1_4T1_cell high, 4T1_MV low, 4T1_sEV low	10	8	4	0	0	0	0	0	1	0	0	0
974	ATP-dependent RNA helicase DDX19A OS=Mus musculus OX=10090 GN=Ddx19a PE=1 SV=2	Q61655	Ddx19a	54 kDa		< 0.00010	1_4T1_cell high, 4T1_MV low, 4T1_sEV low	9	10	11	0	0	0	0	2	0	0	0	0
975	Periostin OS=Mus musculus OX=10090 GN=Postn PE=1 SV=2	Q62009	Postn	93 kDa	TRUE	0.0016	1_4T1_cell low, 4T1_MV low, 4T1_sEV high	0	0	0	0	0	0	4	0	0	11	10	4
976	Apoptosis-inducing factor 1, mitochondrial OS=Mus musculus OX=10090 GN=Aifm1 PE=1 SV=1	Q9Z0X1	Aifm1	67 kDa		< 0.00010	1_4T1_cell high, 4T1_MV low, 4T1_sEV low	8	9	13	0	0	0	0	0	0	0	0	0
977	3-ketoacyl-CoA thiolase, mitochondrial OS=Mus musculus OX=10090 GN=Acaa2 PE=1 SV=3	Q8BWT1	Acaa2	42 kDa		0.008	1_4T1_cell high, 4T1_MV low, 4T1_sEV low	14	15	4	0	0	0	0	0	0	0	0	0
978	Splicing factor 3A subunit 1 OS=Mus musculus OX=10090 GN=Sf3a1 PE=1 SV=1	Q8K4Z5	Sf3a1	89 kDa		< 0.00010	1_4T1_cell high, 4T1_MV low, 4T1_sEV low	6	9	14	0	0	0	0	0	0	0	0	0
979	Lysosome membrane protein 2 OS=Mus musculus OX=10090 GN=Scarb2 PE=1 SV=3	O35114	Scarb2	54 kDa		0.0038	1_4T1_cell low, 4T1_MV low, 4T1_sEV high	1	1	1	9	10	1	1	1	0	1	1	3
980	60S ribosomal protein L22 OS=Mus musculus OX=10090 GN=Rpl22 PE=1 SV=2	P67984	Rpl22	15 kDa		0.045	1_4T1_cell high, 4T1_MV low, 4T1_sEV low	7	7	8	0	2	0	1	3	1	1	1	1
981	Ras-related protein Rab-31 OS=Mus musculus OX=10090 GN=Rab31 PE=1 SV=1	Q921E2	Rab31	21 kDa	TRUE	< 0.00010	1_4T1_cell low, 4T1_MV high, 4T1_sEV high	2	4	3	0	0	0	5	5	2	3	4	4
982	Phosphatidylinositol-binding clathrin assembly protein OS=Mus musculus OX=10090 GN=Picalm PE=1 SV=1	Q7M6Y3	Picalm	72 kDa	TRUE	< 0.00010	1_4T1_cell high, 4T1_MV low, 4T1_sEV low	7	8	9	0	0	0	2	1	1	2	1	1
983	Ubiquitin-conjugating enzyme E2 variant 2 OS=Mus musculus OX=10090 GN=Ube2v2 PE=1 SV=4	Q9D2M8	Ube2v2	16 kDa	TRUE	0.035	1_4T1_cell high, 4T1_MV low, 4T1_sEV low	6	5	2	0	0	0	1	1	1	0	1	1
984	PDZ and LIM domain protein 5 OS=Mus musculus OX=10090 GN=Pdlim5 PE=1 SV=4	Q8CI51	Pdlim5	63 kDa		0.00018	1_4T1_cell high, 4T1_MV low, 4T1_sEV low	8	8	8	0	0	0	2	2	0	1	1	1
985	LIM and SH3 domain protein 1 OS=Mus musculus OX=10090 GN=Lasp1 PE=1 SV=1	Q61792	Lasp1	30 kDa		0.017	1_4T1_cell high, 4T1_MV high, 4T1_sEV low	3	4	7	0	0	0	2	3	0	0	0	0
986	Thioredoxin domain-containing protein 5 OS=Mus musculus OX=10090 GN=Txndc5 PE=1 SV=2	Q91W90	Txndc5	46 kDa		0.00061	1_4T1_cell high, 4T1_MV low, 4T1_sEV low	8	9	12	1	2	0	1	1	0	0	0	0
987	Ataxin-10 OS=Mus musculus OX=10090 GN=Atxn10 PE=1 SV=2	P28658	Atxn10	54 kDa		0.0072	1_4T1_cell high, 4T1_MV high, 4T1_sEV low	8	8	7	0	0	0	3	4	0	1	0	0
988	Insulin-like growth factor 2 mRNA-binding protein 2 OS=Mus musculus OX=10090 GN=Igf2bp2 PE=1 SV=1	Q5SF07	Igf2bp2	66 kDa	TRUE	< 0.00010	1_4T1_cell high, 4T1_MV low, 4T1_sEV low	9	9	9	0	0	0	0	1	0	0	1	0
989	Disco-interacting protein 2 homolog A OS=Mus musculus OX=10090 GN=Dip2a PE=1 SV=3	Q8BWT5	Dip2a	165 kDa	TRUE	0.0077	1_4T1_cell low, 4T1_MV low, 4T1_sEV high	0	0	0	2	4	0	0	3	0	8	6	9
990	Calpain small subunit 1 OS=Mus musculus OX=10090 GN=Capns1 PE=1 SV=1	O88456	Capns1	28 kDa		< 0.00010	1_4T1_cell high, 4T1_MV low, 4T1_sEV low	9	9	9	0	0	0	1	2	0	0	0	0
991	Kinesin-like protein KIF15 OS=Mus musculus OX=10090 GN=Kif15 PE=1 SV=1	Q6P9L6	Kif15	160 kDa		< 0.00010	1_4T1_cell high, 4T1_MV low, 4T1_sEV low	7	9	12	0	0	0	0	0	0	0	0	1
992	Extended synaptotagmin-2 OS=Mus musculus OX=10090 GN=Esyt2 PE=1 SV=1	Q3TZZ7	Esyt2	94 kDa		0.00082	1_4T1_cell high, 4T1_MV low, 4T1_sEV low	8	6	10	0	0	0	2	3	0	0	0	0
993	Pre-mRNA-processing factor 40 homolog A OS=Mus musculus OX=10090 GN=Prpf40a PE=1 SV=1	Q9R1C7	Prpf40a	108 kDa		0.001	1_4T1_cell high, 4T1_MV low, 4T1_sEV low	7	7	12	0	0	0	0	0	0	3	2	0
994	Metastasis-associated protein MTA2 OS=Mus musculus OX=10090 GN=Mta2 PE=1 SV=1	Q9R190	Mta2	75 kDa	TRUE	< 0.00010	1_4T1_cell high, 4T1_MV low, 4T1_sEV low	7	8	13	0	0	0	0	0	0	0	0	0
995	Phospholipase A-2-activating protein OS=Mus musculus OX=10090 GN=Plaa PE=1 SV=4	P27612	Plaa	87 kDa		< 0.00010	1_4T1_cell high, 4T1_MV low, 4T1_sEV low	7	9	13	0	0	0	0	1	0	0	0	0
996	2-amino-3-ketobutyrate coenzyme A ligase, mitochondrial OS=Mus musculus OX=10090 GN=Gcat PE=1 SV=2	O88986	Gcat	45 kDa		0.00018	1_4T1_cell high, 4T1_MV low, 4T1_sEV low	12	12	9	1	0	0	0	0	0	0	0	0
997	Proteasome activator complex subunit 3 OS=Mus musculus OX=10090 GN=Psme3 PE=1 SV=1	P61290	Psme3	30 kDa		< 0.00010	1_4T1_cell high, 4T1_MV low, 4T1_sEV low	8	10	13	0	0	0	0	0	0	0	0	0
998	Alkyldihydroxyacetonephosphate synthase, peroxisomal OS=Mus musculus OX=10090 GN=Agps PE=1 SV=1	Q8C0I1	Agps	72 kDa		< 0.00010	1_4T1_cell high, 4T1_MV low, 4T1_sEV low	11	14	9	0	0	0	0	0	0	0	0	0
999	Protein phosphatase 1 regulatory subunit 7 OS=Mus musculus OX=10090 GN=Ppp1r7 PE=1 SV=2	Q3UM45	Ppp1r7	41 kDa		0.00011	1_4T1_cell high, 4T1_MV low, 4T1_sEV low	11	13	8	0	0	0	0	0	0	0	0	0
1000	Nardilysin OS=Mus musculus OX=10090 GN=Nrdc PE=1 SV=1	Q8BHG1	Nrdc	133 kDa		< 0.00010	1_4T1_cell high, 4T1_MV low, 4T1_sEV low	8	10	11	0	0	0	0	0	0	0	0	0
1001	Ubiquitin-associated protein 2-like OS=Mus musculus OX=10090 GN=Ubap2l PE=1 SV=1	Q80X50	Ubap2l	117 kDa		< 0.00010	1_4T1_cell high, 4T1_MV low, 4T1_sEV low	8	10	13	0	0	0	0	0	0	0	0	0
1002	Perilipin-3 OS=Mus musculus OX=10090 GN=Plin3 PE=1 SV=1	Q9DBG5	Plin3	47 kDa		0.0017	1_4T1_cell high, 4T1_MV low, 4T1_sEV low	13	14	6	0	0	0	0	0	0	0	0	0
1003	Serine/threonine-protein phosphatase 2A 55 kDa regulatory subunit B alpha isoform OS=Mus musculus OX=10090 GN=Ppp2r2a PE=1 SV=1	Q6P1F6	Ppp2r2a	52 kDa		0.01	1_4T1_cell high, 4T1_MV low, 4T1_sEV low	6	7	9	0	0	0	2	2	0	1	1	3
1004	Rho guanine nucleotide exchange factor 2 OS=Mus musculus OX=10090 GN=Arhgef2 PE=1 SV=4	Q60875	Arhgef2	112 kDa		0.00063	1_4T1_cell high, 4T1_MV low, 4T1_sEV low	6	5	9	0	1	0	1	0	0	0	0	0
1005	Serine/arginine-rich splicing factor 3 OS=Mus musculus OX=10090 GN=Srsf3 PE=1 SV=1	P84104	Srsf3	19 kDa	TRUE	0.0011	1_4T1_cell high, 4T1_MV low, 4T1_sEV low	6	7	13	0	0	0	1	1	0	1	2	0
1006	Glucosidase 2 subunit beta OS=Mus musculus OX=10090 GN=Prkcsh PE=1 SV=1	O08795	Prkcsh	59 kDa		0.00055	1_4T1_cell high, 4T1_MV low, 4T1_sEV low	7	8	12	1	1	0	1	2	0	0	0	0
1007	Sorting nexin-1 OS=Mus musculus OX=10090 GN=Snx1 PE=1 SV=1	Q9WV80	Snx1	59 kDa	TRUE	0.00018	1_4T1_cell high, 4T1_MV high, 4T1_sEV low	5	6	10	0	0	0	3	3	1	0	1	0
1008	Caveolae-associated protein 1 OS=Mus musculus OX=10090 GN=Cavin1 PE=1 SV=1	O54724	Cavin1	44 kDa		< 0.00010	1_4T1_cell high, 4T1_MV low, 4T1_sEV low	9	10	10	0	0	0	1	2	0	0	0	0
1009	Carnitine O-palmitoyltransferase 2, mitochondrial OS=Mus musculus OX=10090 GN=Cpt2 PE=1 SV=2	P52825	Cpt2	74 kDa		0.088	[]	3	3	4	8	6	0	0	0	0	0	0	0
1010	Transportin-3 OS=Mus musculus OX=10090 GN=Tnpo3 PE=1 SV=1	Q6P2B1	Tnpo3	104 kDa		0.001	1_4T1_cell high, 4T1_MV low, 4T1_sEV low	9	11	5	0	0	0	0	0	0	0	0	0
1011	Procollagen galactosyltransferase 1 OS=Mus musculus OX=10090 GN=Colgalt1 PE=1 SV=2	Q8K297	Colgalt1	71 kDa		< 0.00010	1_4T1_cell high, 4T1_MV low, 4T1_sEV low	8	10	9	0	0	0	0	0	0	0	0	1
1012	Delta(14)-sterol reductase LBR OS=Mus musculus OX=10090 GN=Lbr PE=1 SV=2	Q3U9G9	Lbr	71 kDa		< 0.00010	1_4T1_cell high, 4T1_MV low, 4T1_sEV low	6	6	12	0	0	0	0	0	0	0	0	0
1013	Heat shock 70 kDa protein 14 OS=Mus musculus OX=10090 GN=Hspa14 PE=1 SV=2	Q99M31	Hspa14	55 kDa		< 0.00010	1_4T1_cell high, 4T1_MV low, 4T1_sEV low	11	9	10	0	0	0	0	1	0	0	0	0
1014	Trifunctional enzyme subunit beta, mitochondrial OS=Mus musculus OX=10090 GN=Hadhb PE=1 SV=1	Q99JY0	Hadhb	51 kDa		< 0.00010	1_4T1_cell high, 4T1_MV low, 4T1_sEV low	11	12	9	0	0	0	0	1	0	0	0	0
1015	Clustered mitochondria protein homolog OS=Mus musculus OX=10090 GN=Cluh PE=1 SV=2	Q5SW19	Cluh	148 kDa		0.00068	1_4T1_cell high, 4T1_MV low, 4T1_sEV low	6	5	13	0	0	0	0	0	0	0	0	0
1016	Structural maintenance of chromosomes protein 1A OS=Mus musculus OX=10090 GN=Smc1a PE=1 SV=4	Q9CU62	Smc1a	143 kDa		< 0.00010	1_4T1_cell high, 4T1_MV low, 4T1_sEV low	8	9	11	0	0	0	0	0	0	0	0	0
1017	Calumenin OS=Mus musculus OX=10090 GN=Calu PE=1 SV=1	O35887	Calu	37 kDa		< 0.00010	1_4T1_cell high, 4T1_MV low, 4T1_sEV low	9	8	11	0	0	0	0	0	0	0	0	0
1018	Baculoviral IAP repeat-containing protein 6 OS=Mus musculus OX=10090 GN=Birc6 PE=1 SV=2	O88738	Birc6	532 kDa		0.00011	1_4T1_cell high, 4T1_MV low, 4T1_sEV low	4	7	10	0	0	0	0	0	0	0	0	0
1019	Cell cycle and apoptosis regulator protein 2 OS=Mus musculus OX=10090 GN=Ccar2 PE=1 SV=2	Q8VDP4	Ccar2	103 kDa		0.00074	1_4T1_cell high, 4T1_MV low, 4T1_sEV low	9	14	7	0	0	0	0	0	0	0	0	0
1020	RNA-binding protein 39 OS=Mus musculus OX=10090 GN=Rbm39 PE=1 SV=2	Q8VH51	Rbm39	59 kDa		< 0.00010	1_4T1_cell high, 4T1_MV low, 4T1_sEV low	9	12	13	0	0	0	0	0	0	0	0	0
1021	Coatomer subunit delta OS=Mus musculus OX=10090 GN=Arcn1 PE=1 SV=2	Q5XJY5	Arcn1	57 kDa		< 0.00010	1_4T1_cell high, 4T1_MV low, 4T1_sEV low	10	7	11	0	0	0	0	0	0	0	0	0
1022	HEAT repeat-containing protein 3 OS=Mus musculus OX=10090 GN=Heatr3 PE=1 SV=1	Q8BQM4	Heatr3	74 kDa		< 0.00010	1_4T1_cell high, 4T1_MV low, 4T1_sEV low	8	14	10	0	0	0	0	0	0	0	0	0
1023	Mitochondrial import inner membrane translocase subunit TIM44 OS=Mus musculus OX=10090 GN=Timm44 PE=1 SV=2	O35857	Timm44	51 kDa		< 0.00010	1_4T1_cell high, 4T1_MV low, 4T1_sEV low	12	12	9	0	0	0	0	0	0	0	0	0
1024	Poly [ADP-ribose] polymerase 1 OS=Mus musculus OX=10090 GN=Parp1 PE=1 SV=3	P11103	Parp1	113 kDa		0.0005	1_4T1_cell high, 4T1_MV low, 4T1_sEV low	6	8	16	0	0	0	0	0	0	0	0	0
1025	Rap1 GTPase-GDP dissociation stimulator 1 OS=Mus musculus OX=10090 GN=Rap1gds1 PE=2 SV=1	GDS1_MOUSE	Rap1gds1	?		0.059	[]	14	14	0	0	0	0	0	1	0	0	0	0
1026	SERPINE1 mRNA-binding protein 1 OS=Mus musculus OX=10090 GN=Serbp1 PE=1 SV=2	Q9CY58	Serbp1	45 kDa	TRUE	0.44	[]	0	0	34	0	0	0	0	0	0	0	0	0
1027	Laminin subunit gamma-2 OS=Mus musculus OX=10090 GN=Lamc2 PE=1 SV=2	Q61092	Lamc2	130 kDa		0.55	[]	2	1	1	1	4	0	5	1	2	5	2	1
1028	Collagen alpha-1(IV) chain OS=Mus musculus OX=10090 GN=Col4a1 PE=1 SV=4	P02463	Col4a1	161 kDa		0.27	[]	0	0	1	2	7	0	4	5	3	5	4	1
1029	Alpha-soluble NSF attachment protein OS=Mus musculus OX=10090 GN=Napa PE=1 SV=1	Q9DB05	Napa	33 kDa		0.0066	1_4T1_cell high, 4T1_MV low, 4T1_sEV low	7	7	6	0	0	0	2	3	0	2	2	1
1030	40S ribosomal protein S23 OS=Mus musculus OX=10090 GN=Rps23 PE=1 SV=3	P62267	Rps23	16 kDa		0.011	1_4T1_cell high, 4T1_MV low, 4T1_sEV low	5	5	14	0	0	0	1	1	0	1	2	2
1031	60S ribosomal protein L28 OS=Mus musculus OX=10090 GN=Rpl28 PE=1 SV=2	P41105	Rpl28	16 kDa		0.13	[]	3	3	17	0	0	0	1	1	0	1	1	1
1032	Kinesin light chain 1 OS=Mus musculus OX=10090 GN=Klc1 PE=1 SV=3	O88447	Klc1	61 kDa	TRUE	0.00074	1_4T1_cell high, 4T1_MV low, 4T1_sEV low	7	8	10	0	0	0	3	2	0	1	1	0
1033	Glutaredoxin-3 OS=Mus musculus OX=10090 GN=Glrx3 PE=1 SV=1	Q9CQM9	Glrx3	38 kDa		0.002	1_4T1_cell high, 4T1_MV low, 4T1_sEV low	7	8	10	0	0	0	2	3	0	1	2	0
1034	Unconventional myosin-IXb OS=Mus musculus OX=10090 GN=Myo9b PE=1 SV=2	Q9QY06	Myo9b	239 kDa		0.16	[]	1	4	2	0	0	0	10	6	0	0	3	0
1035	Flotillin-1 OS=Mus musculus OX=10090 GN=Flot1 PE=1 SV=1	O08917	Flot1	48 kDa		0.0014	1_4T1_cell low, 4T1_MV low, 4T1_sEV high	0	0	0	0	0	0	1	4	1	6	6	9
1036	Transmembrane protein 79 OS=Mus musculus OX=10090 GN=Tmem79 PE=1 SV=1	Q9D709	Tmem79	43 kDa		0.015	1_4T1_cell low, 4T1_MV high, 4T1_sEV high	0	0	0	0	0	0	4	3	6	5	7	5
1037	Stathmin OS=Mus musculus OX=10090 GN=Stmn1 PE=1 SV=2	P54227	Stmn1	17 kDa		0.00012	1_4T1_cell high, 4T1_MV low, 4T1_sEV low	6	8	10	0	1	0	0	0	0	0	1	0
1038	Oxygen-dependent coproporphyrinogen-III oxidase, mitochondrial OS=Mus musculus OX=10090 GN=Cpox PE=1 SV=2	P36552	Cpox	50 kDa		0.066	[]	8	7	7	5	4	0	0	0	0	0	0	0
1039	Membrane-associated progesterone receptor component 1 OS=Mus musculus OX=10090 GN=Pgrmc1 PE=1 SV=4	O55022	Pgrmc1	22 kDa	TRUE	0.062	[]	6	6	8	5	5	0	0	0	0	0	0	0
1040	Glycylpeptide N-tetradecanoyltransferase 1 OS=Mus musculus OX=10090 GN=Nmt1 PE=1 SV=1	O70310	Nmt1	57 kDa	TRUE	< 0.00010	1_4T1_cell high, 4T1_MV low, 4T1_sEV low	8	12	8	0	0	0	0	0	0	0	0	0
1041	Protein-arginine deiminase type-4 OS=Mus musculus OX=10090 GN=Padi4 PE=1 SV=3	Q9Z183	Padi4	74 kDa		0.0079	1_4T1_cell high, 4T1_MV low, 4T1_sEV low	6	8	9	0	0	0	0	0	0	0	0	3
1042	eIF5-mimic protein 1 OS=Mus musculus OX=10090 GN=Bzw2 PE=1 SV=1	5MP1_MOUSE (+1)	Bzw2	?	TRUE	0.088	[]	8	11	0	0	0	0	1	2	0	0	0	0
1043	Cell division cycle 5-like protein OS=Mus musculus OX=10090 GN=Cdc5l PE=1 SV=2	Q6A068	Cdc5l	92 kDa		0.00057	1_4T1_cell high, 4T1_MV low, 4T1_sEV low	5	9	15	0	0	0	0	0	0	0	0	0
1044	CAP-Gly domain-containing linker protein 1 OS=Mus musculus OX=10090 GN=Clip1 PE=1 SV=1	Q922J3	Clip1	156 kDa	TRUE	0.00018	1_4T1_cell high, 4T1_MV low, 4T1_sEV low	5	11	11	0	0	0	0	0	0	0	0	0
1045	Cyclin-dependent kinase 6 OS=Mus musculus OX=10090 GN=Cdk6 PE=1 SV=2	Q64261	Cdk6	37 kDa	TRUE	0.00035	1_4T1_cell high, 4T1_MV low, 4T1_sEV low	7	6	4	0	0	0	0	0	0	0	0	0
1046	ATP-dependent RNA helicase DDX42 OS=Mus musculus OX=10090 GN=Ddx42 PE=1 SV=3	Q810A7	Ddx42	102 kDa		< 0.00010	1_4T1_cell high, 4T1_MV low, 4T1_sEV low	11	8	9	0	0	0	0	0	0	0	0	0
1047	NADH-ubiquinone oxidoreductase 75 kDa subunit, mitochondrial OS=Mus musculus OX=10090 GN=Ndufs1 PE=1 SV=2	Q91VD9	Ndufs1	80 kDa		< 0.00010	1_4T1_cell high, 4T1_MV low, 4T1_sEV low	10	11	10	0	0	0	0	0	0	0	0	0
1048	General transcription factor II-I OS=Mus musculus OX=10090 GN=Gtf2i PE=1 SV=3	Q9ESZ8	Gtf2i	112 kDa		0.00024	1_4T1_cell high, 4T1_MV low, 4T1_sEV low	10	9	6	0	0	0	0	0	0	0	0	0
1049	Deoxynucleoside triphosphate triphosphohydrolase SAMHD1 OS=Mus musculus OX=10090 GN=Samhd1 PE=1 SV=3	Q60710	Samhd1	76 kDa		< 0.00010	1_4T1_cell high, 4T1_MV low, 4T1_sEV low	9	11	9	0	0	0	0	0	0	0	0	0
1050	Microtubule-associated protein 4 OS=Mus musculus OX=10090 GN=Map4 PE=1 SV=3	P27546	Map4	117 kDa		0.00058	1_4T1_cell high, 4T1_MV low, 4T1_sEV low	6	9	17	0	0	0	0	0	0	0	0	0
1051	ERO1-like protein alpha OS=Mus musculus OX=10090 GN=Ero1a PE=1 SV=2	Q8R180	Ero1a	54 kDa		< 0.00010	1_4T1_cell high, 4T1_MV low, 4T1_sEV low	11	13	9	0	0	0	0	0	0	0	0	0
1052	Pseudouridylate synthase 7 homolog OS=Mus musculus OX=10090 GN=Pus7 PE=2 SV=2	Q91VU7	Pus7	75 kDa		< 0.00010	1_4T1_cell high, 4T1_MV low, 4T1_sEV low	6	8	13	0	0	0	0	0	0	0	0	0
1053	Syntaxin-4 OS=Mus musculus OX=10090 GN=Stx4 PE=1 SV=1	P70452	Stx4	34 kDa		0.17	[]	1	1	1	2	2	0	3	3	5	3	3	2
1054	Disintegrin and metalloproteinase domain-containing protein 9 OS=Mus musculus OX=10090 GN=Adam9 PE=1 SV=2	Q61072	Adam9	92 kDa		0.14	[]	0	2	1	5	6	0	2	2	1	2	3	3
1055	Toll-interacting protein OS=Mus musculus OX=10090 GN=Tollip PE=1 SV=1	Q9QZ06	Tollip	30 kDa		0.13	[]	3	2	0	3	2	0	4	5	1	5	4	4
1056	Ras-related protein Rab-18 OS=Mus musculus OX=10090 GN=Rab18 PE=1 SV=2	P35293	Rab18	23 kDa		0.12	[]	5	6	3	0	0	0	4	4	0	2	3	1
1057	Small nuclear ribonucleoprotein Sm D2 OS=Mus musculus OX=10090 GN=Snrpd2 PE=1 SV=1	P62317	Snrpd2	14 kDa		< 0.00010	1_4T1_cell high, 4T1_MV low, 4T1_sEV low	6	7	10	0	0	0	1	1	0	1	2	2
1058	Metalloreductase STEAP2 OS=Mus musculus OX=10090 GN=Steap2 PE=1 SV=1	Q8BWB6	Steap2	56 kDa		0.00091	1_4T1_cell low, 4T1_MV low, 4T1_sEV high	1	2	0	0	0	0	4	3	0	6	5	6
1059	Receptor-type tyrosine-protein phosphatase kappa OS=Mus musculus OX=10090 GN=Ptprk PE=1 SV=1	P35822	Ptprk	164 kDa		0.081	[]	0	0	0	1	3	0	2	1	0	9	7	1
1060	ATP-dependent translocase ABCB1 OS=Mus musculus OX=10090 GN=Abcb1b PE=1 SV=1	P06795	Abcb1b	141 kDa	TRUE	0.095	[]	0	0	3	0	0	1	4	7	7	0	5	0
1061	Cleavage and polyadenylation specificity factor subunit 5 OS=Mus musculus OX=10090 GN=Nudt21 PE=1 SV=1	Q9CQF3	Nudt21	26 kDa		0.0062	1_4T1_cell high, 4T1_MV low, 4T1_sEV low	6	8	8	0	0	0	0	0	1	2	3	0
1062	Plakophilin-4 OS=Mus musculus OX=10090 GN=Pkp4 PE=1 SV=1	Q68FH0	Pkp4	132 kDa	TRUE	0.0038	1_4T1_cell low, 4T1_MV low, 4T1_sEV high	0	1	0	0	0	0	3	3	0	10	10	3
1063	Ribose-5-phosphate isomerase OS=Mus musculus OX=10090 GN=Rpia PE=1 SV=2	P47968	Rpia	32 kDa		0.11	[]	5	8	5	3	5	0	0	2	0	0	0	0
1064	Serine hydroxymethyltransferase, cytosolic OS=Mus musculus OX=10090 GN=Shmt1 PE=1 SV=3	P50431	Shmt1	53 kDa	TRUE	0.00065	1_4T1_cell high, 4T1_MV low, 4T1_sEV low	7	8	11	0	0	0	1	1	0	0	0	2
1065	Probable 28S rRNA (cytosine-C(5))-methyltransferase OS=Mus musculus OX=10090 GN=Nop2 PE=1 SV=1	Q922K7	Nop2	87 kDa		0.028	1_4T1_cell high, 4T1_MV low, 4T1_sEV low	6	6	13	0	0	0	0	0	0	1	0	4
1066	Nuclear factor NF-kappa-B p100 subunit OS=Mus musculus OX=10090 GN=Nfkb2 PE=1 SV=1	Q9WTK5	Nfkb2	97 kDa		0.077	[]	2	4	15	0	0	0	1	1	0	0	0	0
1067	N(4)-(beta-N-acetylglucosaminyl)-L-asparaginase OS=Mus musculus OX=10090 GN=Aga PE=1 SV=1	Q64191	Aga	37 kDa		0.06	[]	4	3	0	10	12	0	0	0	0	0	0	0
1068	COP9 signalosome complex subunit 2 OS=Mus musculus OX=10090 GN=Cops2 PE=1 SV=1	P61202	Cops2	52 kDa		< 0.00010	1_4T1_cell high, 4T1_MV low, 4T1_sEV low	8	8	10	0	0	0	1	0	0	0	0	0
1069	Mitochondrial-processing peptidase subunit alpha OS=Mus musculus OX=10090 GN=Pmpca PE=1 SV=1	Q9DC61	Pmpca	58 kDa		0.0026	1_4T1_cell high, 4T1_MV low, 4T1_sEV low	12	13	5	0	0	0	0	0	0	0	0	0
1070	Spermine synthase OS=Mus musculus OX=10090 GN=Sms PE=1 SV=1	P97355	Sms	41 kDa		< 0.00010	1_4T1_cell high, 4T1_MV low, 4T1_sEV low	9	8	11	0	0	0	0	0	0	0	0	0
1071	Ubiquitin carboxyl-terminal hydrolase 15 OS=Mus musculus OX=10090 GN=Usp15 PE=1 SV=1	Q8R5H1	Usp15	112 kDa	TRUE	< 0.00010	1_4T1_cell high, 4T1_MV low, 4T1_sEV low	6	8	11	0	0	0	0	0	0	0	0	0
1072	Serrate RNA effector molecule homolog OS=Mus musculus OX=10090 GN=Srrt PE=1 SV=1	Q99MR6	Srrt	100 kDa		< 0.00010	1_4T1_cell high, 4T1_MV low, 4T1_sEV low	9	6	12	0	0	0	0	0	0	0	0	0
1073	RNA transcription, translation and transport factor protein OS=Mus musculus OX=10090 GN=RTRAF PE=1 SV=1	Q9CQE8	RTRAF	28 kDa		< 0.00010	1_4T1_cell high, 4T1_MV low, 4T1_sEV low	9	10	12	0	0	0	0	0	0	0	0	0
1074	Electrogenic aspartate/glutamate antiporter SLC25A13, mitochondrial OS=Mus musculus OX=10090 GN=Slc25a13 PE=1 SV=1	S2513_MOUSE	Slc25a13	?	TRUE	0.27	[]	11	14	0	0	5	0	0	0	0	0	0	0
1075	Proteasome subunit beta type-4 OS=Mus musculus OX=10090 GN=Psmb4 PE=1 SV=1	P99026	Psmb4	29 kDa		0.0056	1_4T1_cell high, 4T1_MV low, 4T1_sEV low	6	9	7	1	1	0	1	1	1	1	1	1
1076	Eukaryotic translation initiation factor 1 OS=Mus musculus OX=10090 GN=Eif1 PE=1 SV=2	P48024	Eif1	13 kDa		0.012	1_4T1_cell high, 4T1_MV low, 4T1_sEV low	4	5	11	0	0	0	2	1	1	1	2	0
1077	Histone H1.0 OS=Mus musculus OX=10090 GN=H1-0 PE=2 SV=4	P10922	H1-0	21 kDa		0.092	[]	1	1	4	0	0	0	0	2	0	3	4	12
1078	Aldo-keto reductase family 1 member A1 OS=Mus musculus OX=10090 GN=Akr1a1 PE=1 SV=3	Q9JII6	Akr1a1	37 kDa		0.0034	1_4T1_cell high, 4T1_MV low, 4T1_sEV low	6	8	5	1	1	0	0	1	0	0	0	0
1079	Fermitin family homolog 2 OS=Mus musculus OX=10090 GN=Fermt2 PE=1 SV=1	Q8CIB5	Fermt2	78 kDa	TRUE	0.0024	1_4T1_cell low, 4T1_MV low, 4T1_sEV high	0	0	5	0	0	0	2	2	0	4	8	4
1080	Cytochrome b-c1 complex subunit Rieske, mitochondrial OS=Mus musculus OX=10090 GN=Uqcrfs1 PE=1 SV=1	Q9CR68	Uqcrfs1	29 kDa		0.037	1_4T1_cell high, 4T1_MV low, 4T1_sEV low	4	6	6	3	3	3	0	0	0	0	0	0
1081	Tyrosine-protein phosphatase non-receptor type 11 OS=Mus musculus OX=10090 GN=Ptpn11 PE=1 SV=3	P35235	Ptpn11	68 kDa		< 0.00010	1_4T1_cell high, 4T1_MV low, 4T1_sEV low	8	8	8	0	0	0	1	1	0	1	0	0
1082	ELAV-like protein 1 OS=Mus musculus OX=10090 GN=Elavl1 PE=1 SV=2	P70372	Elavl1	36 kDa		0.0047	1_4T1_cell high, 4T1_MV low, 4T1_sEV low	5	5	13	0	0	0	0	1	0	1	1	0
1083	Procathepsin L OS=Mus musculus OX=10090 GN=Ctsl PE=1 SV=2	P06797	Ctsl	38 kDa		0.066	[]	3	3	4	7	10	0	0	0	0	0	0	0
1084	Large proline-rich protein BAG6 OS=Mus musculus OX=10090 GN=Bag6 PE=1 SV=1	Q9Z1R2	Bag6	121 kDa		< 0.00010	1_4T1_cell high, 4T1_MV low, 4T1_sEV low	6	7	10	0	0	0	0	1	0	0	0	0
1085	Eukaryotic peptide chain release factor GTP-binding subunit ERF3A OS=Mus musculus OX=10090 GN=Gspt1 PE=1 SV=2	Q8R050	Gspt1	69 kDa		0.0031	1_4T1_cell high, 4T1_MV low, 4T1_sEV low	5	5	12	0	0	0	1	2	0	0	0	0
1086	Sepiapterin reductase OS=Mus musculus OX=10090 GN=Spr PE=1 SV=1	Q64105	Spr	28 kDa	TRUE	0.0023	1_4T1_cell high, 4T1_MV low, 4T1_sEV low	9	6	7	0	0	0	0	2	0	0	0	1
1087	Cysteine and glycine-rich protein 1 OS=Mus musculus OX=10090 GN=Csrp1 PE=1 SV=3	P97315	Csrp1	21 kDa		0.12	[]	3	3	15	0	0	0	4	2	0	0	0	0
1088	N-alpha-acetyltransferase 25, NatB auxiliary subunit OS=Mus musculus OX=10090 GN=Naa25 PE=1 SV=1	Q8BWZ3	Naa25	112 kDa		< 0.00010	1_4T1_cell high, 4T1_MV low, 4T1_sEV low	9	8	8	0	0	0	1	2	0	0	0	0
1089	Anamorsin OS=Mus musculus OX=10090 GN=Ciapin1 PE=1 SV=1	Q8WTY4	Ciapin1	33 kDa		0.00077	1_4T1_cell high, 4T1_MV low, 4T1_sEV low	4	5	10	0	0	0	1	0	0	0	0	0
1090	Phosphoribosyl pyrophosphate synthase-associated protein 1 OS=Mus musculus OX=10090 GN=Prpsap1 PE=1 SV=1	Q9D0M1	Prpsap1	39 kDa	TRUE	0.012	1_4T1_cell high, 4T1_MV low, 4T1_sEV low	10	9	6	0	0	0	0	0	0	0	0	3
1091	Presequence protease, mitochondrial OS=Mus musculus OX=10090 GN=Pitrm1 PE=1 SV=1	Q8K411	Pitrm1	117 kDa		< 0.00010	1_4T1_cell high, 4T1_MV low, 4T1_sEV low	4	6	8	0	0	0	0	0	0	0	0	0
1092	Microtubule-associated protein RP/EB family member 1 OS=Mus musculus OX=10090 GN=Mapre1 PE=1 SV=3	Q61166	Mapre1	30 kDa		< 0.00010	1_4T1_cell high, 4T1_MV low, 4T1_sEV low	6	7	13	0	0	0	0	0	0	0	0	0
1093	Sister chromatid cohesion protein PDS5 homolog B OS=Mus musculus OX=10090 GN=Pds5b PE=1 SV=1	Q4VA53	Pds5b	164 kDa	TRUE	< 0.00010	1_4T1_cell high, 4T1_MV low, 4T1_sEV low	7	7	8	0	0	0	0	0	0	0	0	0
1094	Cullin-3 OS=Mus musculus OX=10090 GN=Cul3 PE=1 SV=1	Q9JLV5	Cul3	89 kDa		0.0014	1_4T1_cell high, 4T1_MV low, 4T1_sEV low	10	14	6	0	0	0	0	0	0	0	0	0
1095	Exportin-T OS=Mus musculus OX=10090 GN=Xpot PE=1 SV=3	Q9CRT8	Xpot	110 kDa		< 0.00010	1_4T1_cell high, 4T1_MV low, 4T1_sEV low	8	9	9	0	0	0	0	0	0	0	0	0
1096	Ubiquitin carboxyl-terminal hydrolase 10 OS=Mus musculus OX=10090 GN=Usp10 PE=1 SV=3	P52479	Usp10	87 kDa		< 0.00010	1_4T1_cell high, 4T1_MV low, 4T1_sEV low	10	11	10	0	0	0	0	0	0	0	0	0
1097	Guanine nucleotide-binding protein-like 3 OS=Mus musculus OX=10090 GN=Gnl3 PE=1 SV=2	Q8CI11	Gnl3	61 kDa	TRUE	0.0086	1_4T1_cell high, 4T1_MV low, 4T1_sEV low	4	6	16	0	0	0	0	0	0	0	0	0
1098	Ubiquitin-conjugating enzyme E2 variant 3 OS=Mus musculus OX=10090 GN=Uevld PE=1 SV=1	Q3U1V6	Uevld	52 kDa		0.015	1_4T1_cell low, 4T1_MV low, 4T1_sEV high	4	6	1	0	0	0	2	2	0	4	4	2
1099	Adenosine kinase OS=Mus musculus OX=10090 GN=Adk PE=1 SV=2	P55264	Adk	40 kDa		0.24	[]	9	4	1	0	0	0	3	0	0	2	2	1
1100	Serine/threonine-protein kinase OSR1 OS=Mus musculus OX=10090 GN=Oxsr1 PE=1 SV=1	Q6P9R2	Oxsr1	58 kDa		< 0.00010	1_4T1_cell high, 4T1_MV high, 4T1_sEV low	6	7	6	0	0	0	2	3	1	0	0	0
1101	Dedicator of cytokinesis protein 7 OS=Mus musculus OX=10090 GN=Dock7 PE=1 SV=3	Q8R1A4	Dock7	241 kDa	TRUE	0.039	1_4T1_cell high, 4T1_MV high, 4T1_sEV low	4	7	4	0	0	0	2	3	0	0	0	1
1102	Isopentenyl-diphosphate Delta-isomerase 1 OS=Mus musculus OX=10090 GN=Idi1 PE=1 SV=1	P58044	Idi1	26 kDa		0.0015	1_4T1_cell high, 4T1_MV low, 4T1_sEV low	7	6	7	0	0	0	2	3	0	0	0	0
1103	Nuclear pore complex protein Nup214 OS=Mus musculus OX=10090 GN=Nup214 PE=1 SV=2	Q80U93	Nup214	213 kDa		< 0.00010	1_4T1_cell high, 4T1_MV low, 4T1_sEV low	6	7	8	0	1	0	0	0	0	0	0	0
1104	DNA-directed RNA polymerase II subunit RPB2 OS=Mus musculus OX=10090 GN=Polr2b PE=1 SV=2	Q8CFI7	Polr2b	134 kDa		0.05	1_4T1_cell high, 4T1_MV low, 4T1_sEV low	3	5	12	0	0	0	1	1	0	0	0	2
1105	Nodal modulator 1 OS=Mus musculus OX=10090 GN=Nomo1 PE=1 SV=1	Q6GQT9	Nomo1	133 kDa		0.0017	1_4T1_cell high, 4T1_MV low, 4T1_sEV low	5	7	13	1	1	0	0	0	0	0	0	0
1106	MICAL-like protein 2 OS=Mus musculus OX=10090 GN=Micall2 PE=1 SV=1	Q3TN34	Micall2	108 kDa	TRUE	0.0045	1_4T1_cell high, 4T1_MV low, 4T1_sEV low	5	7	12	0	0	0	0	3	0	0	0	0
1107	Pyruvate dehydrogenase E1 component subunit beta, mitochondrial OS=Mus musculus OX=10090 GN=Pdhb PE=1 SV=1	Q9D051	Pdhb	39 kDa		< 0.00010	1_4T1_cell high, 4T1_MV low, 4T1_sEV low	8	8	6	0	0	0	0	1	0	0	0	0
1108	Coatomer subunit beta' OS=Mus musculus OX=10090 GN=Copb2 PE=1 SV=2	O55029	Copb2	102 kDa		0.0015	1_4T1_cell high, 4T1_MV low, 4T1_sEV low	5	5	13	0	0	0	0	0	0	0	0	0
1109	Thioredoxin reductase 2, mitochondrial OS=Mus musculus OX=10090 GN=Txnrd2 PE=1 SV=4	Q9JLT4	Txnrd2	57 kDa	TRUE	< 0.00010	1_4T1_cell high, 4T1_MV low, 4T1_sEV low	1	1	0	7	12	2	0	0	0	0	0	0
1110	Eukaryotic translation initiation factor 2A OS=Mus musculus OX=10090 GN=Eif2a PE=1 SV=2	Q8BJW6	Eif2a	64 kDa		< 0.00010	1_4T1_cell high, 4T1_MV low, 4T1_sEV low	8	9	9	0	0	0	0	1	0	0	0	0
1111	COP9 signalosome complex subunit 7a OS=Mus musculus OX=10090 GN=Cops7a PE=1 SV=2	Q9CZ04	Cops7a	30 kDa		< 0.00010	1_4T1_cell high, 4T1_MV low, 4T1_sEV low	10	12	8	0	0	0	1	0	0	0	0	0
1112	RRP12-like protein OS=Mus musculus OX=10090 GN=Rrp12 PE=1 SV=1	Q6P5B0	Rrp12	143 kDa		0.32	[]	2	3	16	0	0	1	0	0	0	0	0	0
1113	FACT complex subunit SSRP1 OS=Mus musculus OX=10090 GN=Ssrp1 PE=1 SV=2	Q08943	Ssrp1	81 kDa		0.00061	1_4T1_cell high, 4T1_MV low, 4T1_sEV low	4	7	12	0	0	0	0	0	0	0	0	0
1114	Mitochondrial import receptor subunit TOM70 OS=Mus musculus OX=10090 GN=Tomm70 PE=1 SV=2	Q9CZW5	Tomm70	68 kDa		< 0.00010	1_4T1_cell high, 4T1_MV low, 4T1_sEV low	9	7	10	0	0	0	0	0	0	0	0	0
1115	Serine/threonine-protein phosphatase 6 regulatory subunit 3 OS=Mus musculus OX=10090 GN=Ppp6r3 PE=1 SV=1	Q922D4	Ppp6r3	95 kDa	TRUE	< 0.00010	1_4T1_cell high, 4T1_MV low, 4T1_sEV low	7	8	9	0	0	0	0	0	0	0	0	0
1116	UDP-N-acetylglucosamine--peptide N-acetylglucosaminyltransferase 110 kDa subunit OS=Mus musculus OX=10090 GN=Ogt PE=1 SV=2	Q8CGY8	Ogt	117 kDa		< 0.00010	1_4T1_cell high, 4T1_MV low, 4T1_sEV low	6	7	9	0	0	0	0	0	0	0	0	0
1117	Inverted formin-2 OS=Mus musculus OX=10090 GN=Inf2 PE=1 SV=1	Q0GNC1	Inf2	139 kDa		< 0.00010	1_4T1_cell high, 4T1_MV low, 4T1_sEV low	9	11	8	0	0	0	0	0	0	0	0	0
1118	Cytosolic acyl coenzyme A thioester hydrolase OS=Mus musculus OX=10090 GN=Acot7 PE=1 SV=2	Q91V12	Acot7	43 kDa		0.014	1_4T1_cell high, 4T1_MV low, 4T1_sEV low	4	5	8	0	0	0	3	2	0	1	1	1
1119	Transmembrane emp24 domain-containing protein 10 OS=Mus musculus OX=10090 GN=Tmed10 PE=1 SV=1	Q9D1D4	Tmed10	25 kDa		0.77	[]	6	5	6	0	0	1	2	3	0	2	2	0
1120	Ribonucleoside-diphosphate reductase subunit M2 OS=Mus musculus OX=10090 GN=Rrm2 PE=1 SV=1	P11157	Rrm2	45 kDa		0.18	[]	5	3	7	3	3	0	1	1	2	0	0	0
1121	Mesothelin OS=Mus musculus OX=10090 GN=Msln PE=1 SV=1	Q61468	Msln	69 kDa		< 0.00010	1_4T1_cell low, 4T1_MV low, 4T1_sEV high	0	1	0	0	0	0	1	3	2	7	7	6
1122	Heterogeneous nuclear ribonucleoproteins C1/C2 OS=Mus musculus OX=10090 GN=Hnrnpc PE=1 SV=1	Q9Z204	Hnrnpc	34 kDa		0.5	[]	0	1	21	0	0	0	1	1	0	1	1	2
1123	Cingulin OS=Mus musculus OX=10090 GN=Cgn PE=1 SV=1	P59242	Cgn	136 kDa		0.02	1_4T1_cell high, 4T1_MV high, 4T1_sEV low	3	5	9	0	0	0	3	3	0	0	0	0
1124	26S proteasome non-ATPase regulatory subunit 8 OS=Mus musculus OX=10090 GN=Psmd8 PE=1 SV=2	Q9CX56	Psmd8	40 kDa		0.016	1_4T1_cell high, 4T1_MV high, 4T1_sEV low	3	4	7	0	0	0	3	2	0	0	0	0
1125	NADP-dependent malic enzyme OS=Mus musculus OX=10090 GN=Me1 PE=1 SV=2	P06801	Me1	64 kDa		0.00026	1_4T1_cell high, 4T1_MV low, 4T1_sEV low	7	9	7	1	1	0	0	0	0	0	0	0
1126	Developmentally-regulated GTP-binding protein 2 OS=Mus musculus OX=10090 GN=Drg2 PE=1 SV=1	Q9QXB9	Drg2	41 kDa	TRUE	0.00032	1_4T1_cell high, 4T1_MV low, 4T1_sEV low	5	8	11	0	0	0	2	1	0	0	0	0
1127	Vacuolar protein-sorting-associated protein 36 OS=Mus musculus OX=10090 GN=Vps36 PE=1 SV=1	Q91XD6	Vps36	44 kDa		< 0.00010	1_4T1_cell low, 4T1_MV low, 4T1_sEV high	0	0	0	0	0	0	0	1	0	9	10	5
1128	Acyl-coenzyme A thioesterase 9, mitochondrial OS=Mus musculus OX=10090 GN=Acot9 PE=1 SV=1	Q9R0X4	Acot9	51 kDa		< 0.00010	1_4T1_cell high, 4T1_MV low, 4T1_sEV low	6	6	7	0	0	0	0	1	0	0	0	0
1129	Sideroflexin-1 OS=Mus musculus OX=10090 GN=Sfxn1 PE=1 SV=3	Q99JR1	Sfxn1	36 kDa	TRUE	0.0036	1_4T1_cell high, 4T1_MV low, 4T1_sEV low	10	9	4	0	0	0	0	1	0	0	0	0
1130	Kinesin-like protein KIF11 OS=Mus musculus OX=10090 GN=Kif11 PE=1 SV=1	Q6P9P6	Kif11	118 kDa		0.00068	1_4T1_cell high, 4T1_MV low, 4T1_sEV low	5	7	14	0	0	0	0	0	0	0	0	0
1131	Nuclear cap-binding protein subunit 1 OS=Mus musculus OX=10090 GN=Ncbp1 PE=1 SV=2	Q3UYV9	Ncbp1	92 kDa		0.0024	1_4T1_cell high, 4T1_MV low, 4T1_sEV low	3	9	12	0	0	0	0	0	0	0	0	0
1132	Leucine-rich repeat flightless-interacting protein 1 OS=Mus musculus OX=10090 GN=Lrrfip1 PE=1 SV=2	Q3UZ39	Lrrfip1	79 kDa	TRUE	< 0.00010	1_4T1_cell high, 4T1_MV low, 4T1_sEV low	7	8	12	0	0	0	0	0	0	0	0	0
1133	Leucine-rich repeat-containing protein 40 OS=Mus musculus OX=10090 GN=Lrrc40 PE=1 SV=2	Q9CRC8	Lrrc40	68 kDa		< 0.00010	1_4T1_cell high, 4T1_MV low, 4T1_sEV low	8	9	8	0	0	0	0	0	0	0	0	0
1134	RNA-binding protein 25 OS=Mus musculus OX=10090 GN=Rbm25 PE=1 SV=2	B2RY56	Rbm25	100 kDa		0.00042	1_4T1_cell high, 4T1_MV low, 4T1_sEV low	4	6	11	0	0	0	0	0	0	0	0	0
1135	Short-chain specific acyl-CoA dehydrogenase, mitochondrial OS=Mus musculus OX=10090 GN=Acads PE=1 SV=2	Q07417	Acads	45 kDa		0.001	1_4T1_cell high, 4T1_MV low, 4T1_sEV low	9	11	5	0	0	0	0	0	0	0	0	0
1136	Coatomer subunit epsilon OS=Mus musculus OX=10090 GN=Cope PE=1 SV=3	O89079	Cope	35 kDa		< 0.00010	1_4T1_cell high, 4T1_MV low, 4T1_sEV low	9	11	9	0	0	0	0	0	0	0	0	0
1137	Ribonucleoprotein PTB-binding 1 OS=Mus musculus OX=10090 GN=Raver1 PE=1 SV=2	Q9CW46	Raver1	79 kDa		0.0044	1_4T1_cell high, 4T1_MV low, 4T1_sEV low	8	12	4	0	0	0	0	0	0	0	0	0
1138	Succinate--CoA ligase [ADP-forming] subunit beta, mitochondrial OS=Mus musculus OX=10090 GN=Sucla2 PE=1 SV=2	Q9Z2I9	Sucla2	50 kDa		< 0.00010	1_4T1_cell high, 4T1_MV low, 4T1_sEV low	7	9	9	0	0	0	0	0	0	0	0	0
1139	NEDD8-conjugating enzyme Ubc12 OS=Mus musculus OX=10090 GN=Ube2m PE=1 SV=1	P61082	Ube2m	21 kDa		0.024	1_4T1_cell high, 4T1_MV high, 4T1_sEV low	5	5	6	1	1	0	3	2	1	0	1	1
1140	Signal recognition particle 14 kDa protein OS=Mus musculus OX=10090 GN=Srp14 PE=1 SV=1	P16254	Srp14	13 kDa		0.089	[]	1	1	3	0	0	0	3	4	7	2	4	3
1141	Desmoglein-2 OS=Mus musculus OX=10090 GN=Dsg2 PE=1 SV=3	O55111	Dsg2	122 kDa		0.013	1_4T1_cell low, 4T1_MV low, 4T1_sEV high	0	0	1	1	2	0	3	3	1	4	8	3
1142	Inositol monophosphatase 1 OS=Mus musculus OX=10090 GN=Impa1 PE=1 SV=1	O55023	Impa1	30 kDa		0.068	[]	6	5	6	1	1	0	4	4	0	0	0	0
1143	Transcriptional activator protein Pur-alpha OS=Mus musculus OX=10090 GN=Pura PE=1 SV=1	P42669	Pura	35 kDa		0.026	1_4T1_cell high, 4T1_MV low, 4T1_sEV high	4	5	7	0	0	0	1	0	0	1	2	4
1144	Drebrin-like protein OS=Mus musculus OX=10090 GN=Dbnl PE=1 SV=2	Q62418	Dbnl	49 kDa		0.00016	1_4T1_cell high, 4T1_MV high, 4T1_sEV low	5	5	8	0	0	0	4	4	1	0	0	0
1145	Receptor-type tyrosine-protein phosphatase alpha OS=Mus musculus OX=10090 GN=Ptpra PE=1 SV=3	P18052	Ptpra	94 kDa		< 0.00010	1_4T1_cell low, 4T1_MV high, 4T1_sEV high	0	0	0	0	0	0	4	3	1	5	6	3
1146	Nucleolar protein 58 OS=Mus musculus OX=10090 GN=Nop58 PE=1 SV=1	Q6DFW4	Nop58	60 kDa		0.027	1_4T1_cell high, 4T1_MV low, 4T1_sEV high	4	4	10	0	0	0	0	0	0	1	2	4
1147	Proliferation marker protein Ki-67 OS=Mus musculus OX=10090 GN=Mki67 PE=1 SV=1	E9PVX6	Mki67	351 kDa		0.45	[]	1	0	15	0	0	0	0	1	2	0	0	0
1148	Nucleolar protein 56 OS=Mus musculus OX=10090 GN=Nop56 PE=1 SV=2	Q9D6Z1	Nop56	64 kDa		0.11	[]	3	4	17	0	0	0	0	1	0	0	1	2
1149	Proline-, glutamic acid- and leucine-rich protein 1 OS=Mus musculus OX=10090 GN=Pelp1 PE=1 SV=2	Q9DBD5	Pelp1	118 kDa		0.00029	1_4T1_cell high, 4T1_MV low, 4T1_sEV low	5	7	10	0	0	0	0	0	0	1	2	0
1150	Mitotic checkpoint protein BUB3 OS=Mus musculus OX=10090 GN=Bub3 PE=1 SV=2	Q9WVA3	Bub3	37 kDa		0.018	1_4T1_cell high, 4T1_MV low, 4T1_sEV low	5	7	8	0	0	0	0	0	0	0	0	3
1151	Medium-chain specific acyl-CoA dehydrogenase, mitochondrial OS=Mus musculus OX=10090 GN=Acadm PE=1 SV=1	P45952	Acadm	46 kDa		0.45	[]	8	7	7	0	0	3	0	0	0	0	0	0
1152	Vesicle-associated membrane protein-associated protein A OS=Mus musculus OX=10090 GN=Vapa PE=1 SV=2	Q9WV55	Vapa	28 kDa	TRUE	0.00025	1_4T1_cell high, 4T1_MV low, 4T1_sEV low	6	5	9	0	1	0	0	0	0	0	0	0
1153	DnaJ homolog subfamily C member 2 OS=Mus musculus OX=10090 GN=Dnajc2 PE=1 SV=2	P54103	Dnajc2	72 kDa		< 0.00010	1_4T1_cell high, 4T1_MV low, 4T1_sEV low	7	7	8	0	0	0	0	0	0	0	0	0
1154	Long-chain-fatty-acid--CoA ligase 3 OS=Mus musculus OX=10090 GN=Acsl3 PE=1 SV=2	Q9CZW4	Acsl3	80 kDa	TRUE	< 0.00010	1_4T1_cell high, 4T1_MV low, 4T1_sEV low	8	8	6	0	0	0	0	1	0	0	0	0
1155	NADH dehydrogenase [ubiquinone] flavoprotein 1, mitochondrial OS=Mus musculus OX=10090 GN=Ndufv1 PE=1 SV=1	Q91YT0	Ndufv1	51 kDa		< 0.00010	1_4T1_cell high, 4T1_MV low, 4T1_sEV low	8	8	7	0	0	0	0	0	0	0	0	0
1156	E3 ubiquitin-protein ligase UBR5 OS=Mus musculus OX=10090 GN=Ubr5 PE=1 SV=2	Q80TP3	Ubr5	308 kDa		0.00065	1_4T1_cell high, 4T1_MV low, 4T1_sEV low	11	8	6	0	0	0	0	0	0	0	0	0
1157	Rho guanine nucleotide exchange factor 1 OS=Mus musculus OX=10090 GN=Arhgef1 PE=1 SV=2	Q61210	Arhgef1	103 kDa		0.013	1_4T1_cell high, 4T1_MV low, 4T1_sEV low	3	6	15	0	0	0	0	0	0	0	0	0
1158	Ubiquitin carboxyl-terminal hydrolase isozyme L5 OS=Mus musculus OX=10090 GN=Uchl5 PE=1 SV=2	Q9WUP7	Uchl5	38 kDa		< 0.00010	1_4T1_cell high, 4T1_MV low, 4T1_sEV low	9	7	10	0	0	0	0	0	0	0	0	0
1159	Sialic acid synthase OS=Mus musculus OX=10090 GN=Nans PE=1 SV=1	Q99J77	Nans	40 kDa		0.0021	1_4T1_cell high, 4T1_MV low, 4T1_sEV low	6	7	5	0	0	0	2	1	0	2	2	1
1160	60S ribosomal protein L26 OS=Mus musculus OX=10090 GN=Rpl26 PE=1 SV=1	P61255	Rpl26	17 kDa		0.15	[]	2	3	8	0	0	0	0	1	0	1	1	4
1161	Endoplasmic reticulum metallopeptidase 1 OS=Mus musculus OX=10090 GN=Ermp1 PE=1 SV=2	Q3UVK0	Ermp1	100 kDa		0.0031	1_4T1_cell high, 4T1_MV low, 4T1_sEV low	6	5	1	3	4	2	0	0	1	0	0	0
1162	S-phase kinase-associated protein 1 OS=Mus musculus OX=10090 GN=Skp1 PE=1 SV=3	Q9WTX5	Skp1	19 kDa		0.0013	1_4T1_cell high, 4T1_MV low, 4T1_sEV low	6	8	6	0	0	0	1	2	0	1	1	0
1163	Neuropilin-1 OS=Mus musculus OX=10090 GN=Nrp1 PE=1 SV=2	P97333	Nrp1	103 kDa		0.0016	1_4T1_cell low, 4T1_MV low, 4T1_sEV high	0	0	0	1	1	0	0	0	2	7	8	4
1164	Twinfilin-1 OS=Mus musculus OX=10090 GN=Twf1 PE=1 SV=2	Q91YR1	Twf1	40 kDa	TRUE	< 0.00010	1_4T1_cell high, 4T1_MV high, 4T1_sEV low	4	4	6	0	0	0	4	4	2	0	1	0
1165	Eukaryotic translation initiation factor 4H OS=Mus musculus OX=10090 GN=Eif4h PE=1 SV=3	Q9WUK2	Eif4h	27 kDa		0.0041	1_4T1_cell high, 4T1_MV low, 4T1_sEV low	4	5	7	1	1	0	1	1	0	0	0	0
1166	Omega-amidase NIT2 OS=Mus musculus OX=10090 GN=Nit2 PE=1 SV=1	Q9JHW2	Nit2	31 kDa		0.021	1_4T1_cell high, 4T1_MV low, 4T1_sEV low	4	5	8	2	2	0	0	0	0	0	0	0
1167	COP9 signalosome complex subunit 5 OS=Mus musculus OX=10090 GN=Cops5 PE=1 SV=3	O35864	Cops5	38 kDa		0.0007	1_4T1_cell high, 4T1_MV low, 4T1_sEV low	7	5	7	0	0	0	2	2	0	0	0	0
1168	Thymidine kinase, cytosolic OS=Mus musculus OX=10090 GN=Tk1 PE=1 SV=3	P04184	Tk1	26 kDa		0.013	1_4T1_cell high, 4T1_MV low, 4T1_sEV low	4	3	9	0	0	0	2	2	0	0	0	0
1169	COP9 signalosome complex subunit 1 OS=Mus musculus OX=10090 GN=Gps1 PE=1 SV=1	Q99LD4	Gps1	53 kDa		0.00071	1_4T1_cell high, 4T1_MV low, 4T1_sEV low	5	8	6	0	0	0	2	1	0	0	0	0
1170	Symplekin OS=Mus musculus OX=10090 GN=Sympk PE=1 SV=2	Q80X82	Sympk	143 kDa		0.00015	1_4T1_cell high, 4T1_MV low, 4T1_sEV low	4	6	9	0	0	0	0	1	0	0	0	0
1171	Catechol O-methyltransferase OS=Mus musculus OX=10090 GN=Comt PE=1 SV=2	O88587	Comt	29 kDa		< 0.00010	1_4T1_cell high, 4T1_MV low, 4T1_sEV low	6	9	6	0	0	0	0	0	0	0	0	0
1172	Tumor protein D52 OS=Mus musculus OX=10090 GN=Tpd52 PE=1 SV=2	Q62393	Tpd52	24 kDa		< 0.00010	1_4T1_cell high, 4T1_MV low, 4T1_sEV low	8	8	8	0	0	0	1	0	0	0	0	0
1173	Leucine-rich repeat-containing protein 47 OS=Mus musculus OX=10090 GN=Lrrc47 PE=1 SV=1	Q505F5	Lrrc47	64 kDa		< 0.00010	1_4T1_cell high, 4T1_MV low, 4T1_sEV low	7	5	9	0	0	0	0	0	0	0	0	0
1174	Vesicle-fusing ATPase OS=Mus musculus OX=10090 GN=Nsf PE=1 SV=2	P46460	Nsf	83 kDa		< 0.00010	1_4T1_cell high, 4T1_MV low, 4T1_sEV low	5	4	7	0	0	0	0	0	0	0	0	0
1175	cAMP-dependent protein kinase type II-alpha regulatory subunit OS=Mus musculus OX=10090 GN=Prkar2a PE=1 SV=2	P12367	Prkar2a	45 kDa	TRUE	< 0.00010	1_4T1_cell high, 4T1_MV low, 4T1_sEV low	6	9	10	0	0	0	1	0	0	0	0	0
1176	Angiopoietin-related protein 2 OS=Mus musculus OX=10090 GN=Angptl2 PE=2 SV=2	Q9R045	Angptl2	57 kDa		0.15	[]	0	0	0	0	0	0	6	0	0	7	8	0
1177	Heterogeneous nuclear ribonucleoprotein U-like protein 2 OS=Mus musculus OX=10090 GN=Hnrnpul2 PE=1 SV=2	Q00PI9	Hnrnpul2	85 kDa		0.00093	1_4T1_cell high, 4T1_MV low, 4T1_sEV low	4	5	11	0	0	0	0	0	0	0	0	0
1178	Non-POU domain-containing octamer-binding protein OS=Mus musculus OX=10090 GN=Nono PE=1 SV=3	Q99K48	Nono	55 kDa	TRUE	< 0.00010	1_4T1_cell high, 4T1_MV low, 4T1_sEV low	6	5	9	0	0	0	0	0	0	0	0	0
1179	UV excision repair protein RAD23 homolog A OS=Mus musculus OX=10090 GN=Rad23a PE=1 SV=2	P54726	Rad23a	40 kDa	TRUE	< 0.00010	1_4T1_cell high, 4T1_MV low, 4T1_sEV low	7	9	7	0	0	0	0	0	0	0	0	0
1180	Exosome RNA helicase MTR4 OS=Mus musculus OX=10090 GN=Mtrex PE=1 SV=1	Q9CZU3	Mtrex	118 kDa		< 0.00010	1_4T1_cell high, 4T1_MV low, 4T1_sEV low	6	7	11	0	0	0	0	0	0	0	0	0
1181	Nuclear pore complex protein Nup98-Nup96 OS=Mus musculus OX=10090 GN=Nup98 PE=1 SV=2	Q6PFD9	Nup98	197 kDa		< 0.00010	1_4T1_cell high, 4T1_MV low, 4T1_sEV low	7	6	7	0	0	0	0	0	0	0	0	0
1182	Cell growth-regulating nucleolar protein OS=Mus musculus OX=10090 GN=Lyar PE=1 SV=2	Q08288	Lyar	44 kDa		0.035	1_4T1_cell high, 4T1_MV low, 4T1_sEV low	2	6	16	0	0	0	0	0	0	0	0	0
1183	Murinoglobulin-1 OS=Mus musculus OX=10090 GN=Mug1 PE=1 SV=3	P28665	Mug1	165 kDa	TRUE	0.44	[]	0	0	0	0	0	11	0	0	0	0	0	0
1184	Actin-related protein 2/3 complex subunit 5 OS=Mus musculus OX=10090 GN=Arpc5 PE=1 SV=3	Q9CPW4	Arpc5	16 kDa		0.25	[]	4	5	4	0	1	1	2	4	3	0	0	1
1185	PDZ domain-containing protein GIPC1 OS=Mus musculus OX=10090 GN=Gipc1 PE=1 SV=1	Q9Z0G0	Gipc1	36 kDa	TRUE	0.11	[]	1	4	2	0	0	0	4	5	0	2	3	2
1186	Myc box-dependent-interacting protein 1 OS=Mus musculus OX=10090 GN=Bin1 PE=1 SV=1	O08539	Bin1	64 kDa		0.0003	1_4T1_cell high, 4T1_MV low, 4T1_sEV low	7	5	7	0	0	0	2	1	1	1	1	0
1187	Malectin OS=Mus musculus OX=10090 GN=Mlec PE=1 SV=2	Q6ZQI3	Mlec	32 kDa		0.0048	1_4T1_cell high, 4T1_MV low, 4T1_sEV low	6	5	5	1	1	0	1	1	0	0	0	0
1188	Tubulin-specific chaperone A OS=Mus musculus OX=10090 GN=Tbca PE=1 SV=3	P48428	Tbca	13 kDa		0.0002	1_4T1_cell high, 4T1_MV low, 4T1_sEV low	6	7	8	0	1	0	1	1	1	0	0	0
1189	Putative phospholipase B-like 2 OS=Mus musculus OX=10090 GN=Plbd2 PE=1 SV=2	Q3TCN2	Plbd2	66 kDa		0.079	[]	1	1	1	4	7	0	0	1	0	0	0	0
1190	Glyoxylate reductase/hydroxypyruvate reductase OS=Mus musculus OX=10090 GN=Grhpr PE=1 SV=1	Q91Z53	Grhpr	35 kDa		0.14	[]	6	7	1	3	4	0	0	2	0	0	0	0
1191	Matrix metalloproteinase-14 OS=Mus musculus OX=10090 GN=Mmp14 PE=2 SV=3	P53690	Mmp14	66 kDa		0.048	1_4T1_cell low, 4T1_MV high, 4T1_sEV high	0	0	0	0	0	0	1	2	4	6	5	2
1192	Xaa-Pro aminopeptidase 2 OS=Mus musculus OX=10090 GN=Xpnpep2 PE=1 SV=1	B1AVD1	Xpnpep2	76 kDa		0.069	[]	0	0	0	8	8	0	0	1	0	0	2	1
1193	Rho-associated protein kinase 2 OS=Mus musculus OX=10090 GN=Rock2 PE=1 SV=1	P70336	Rock2	161 kDa	TRUE	0.0022	1_4T1_cell high, 4T1_MV low, 4T1_sEV low	7	9	4	0	0	0	1	1	0	0	0	0
1194	Epidermal growth factor receptor substrate 15 OS=Mus musculus OX=10090 GN=Eps15 PE=1 SV=1	P42567	Eps15	98 kDa		0.00024	1_4T1_cell high, 4T1_MV low, 4T1_sEV low	7	7	6	0	0	0	2	1	0	0	0	0
1195	cAMP-dependent protein kinase type II-beta regulatory subunit OS=Mus musculus OX=10090 GN=Prkar2b PE=1 SV=3	P31324	Prkar2b	46 kDa	TRUE	0.00023	1_4T1_cell high, 4T1_MV low, 4T1_sEV low	8	9	6	0	0	0	0	0	0	0	0	1
1196	Amine oxidase [flavin-containing] A OS=Mus musculus OX=10090 GN=Maoa PE=1 SV=3	Q64133	Maoa	60 kDa		0.41	[]	7	3	9	0	0	2	0	0	0	0	0	0
1197	Succinate--CoA ligase [GDP-forming] subunit beta, mitochondrial OS=Mus musculus OX=10090 GN=Suclg2 PE=1 SV=3	Q9Z2I8	Suclg2	47 kDa		0.0011	1_4T1_cell high, 4T1_MV low, 4T1_sEV low	7	9	4	0	0	0	0	0	0	0	0	0
1198	Hepatoma-derived growth factor OS=Mus musculus OX=10090 GN=Hdgf PE=1 SV=2	P51859	Hdgf	26 kDa	TRUE	< 0.00010	1_4T1_cell high, 4T1_MV low, 4T1_sEV low	5	7	10	0	0	0	0	0	0	0	0	0
1199	Transcription elongation factor A protein 1 OS=Mus musculus OX=10090 GN=Tcea1 PE=1 SV=2	P10711	Tcea1	34 kDa		< 0.00010	1_4T1_cell high, 4T1_MV low, 4T1_sEV low	7	6	11	0	0	0	0	0	0	0	0	0
1200	Serine/threonine-protein phosphatase 4 regulatory subunit 3A OS=Mus musculus OX=10090 GN=Ppp4r3a PE=1 SV=1	Q6P2K6	Ppp4r3a	94 kDa	TRUE	< 0.00010	1_4T1_cell high, 4T1_MV low, 4T1_sEV low	7	6	8	0	0	0	0	0	0	0	0	0
1201	Methionine aminopeptidase 1 OS=Mus musculus OX=10090 GN=Metap1 PE=1 SV=1	Q8BP48	Metap1	43 kDa		< 0.00010	1_4T1_cell high, 4T1_MV low, 4T1_sEV low	8	8	8	0	0	0	0	0	0	0	0	0
1202	Regulator of chromosome condensation OS=Mus musculus OX=10090 GN=Rcc1 PE=1 SV=1	Q8VE37	Rcc1	45 kDa		< 0.00010	1_4T1_cell high, 4T1_MV low, 4T1_sEV low	7	6	10	0	0	0	0	0	0	0	0	0
1203	Pyrroline-5-carboxylate reductase 2 OS=Mus musculus OX=10090 GN=Pycr2 PE=1 SV=1	Q922Q4	Pycr2	34 kDa		0.00014	1_4T1_cell high, 4T1_MV low, 4T1_sEV low	8	10	6	0	0	0	0	0	0	0	0	0
1204	GrpE protein homolog 1, mitochondrial OS=Mus musculus OX=10090 GN=Grpel1 PE=1 SV=1	Q99LP6	Grpel1	24 kDa		0.0092	1_4T1_cell high, 4T1_MV low, 4T1_sEV low	5	7	6	2	1	1	1	1	0	0	0	0
1205	CAAX prenyl protease 1 homolog OS=Mus musculus OX=10090 GN=Zmpste24 PE=1 SV=2	Q80W54	Zmpste24	55 kDa		0.0001	1_4T1_cell high, 4T1_MV low, 4T1_sEV low	2	2	3	5	8	3	0	0	0	0	1	0
1206	DnaJ homolog subfamily C member 7 OS=Mus musculus OX=10090 GN=Dnajc7 PE=1 SV=2	Q9QYI3	Dnajc7	56 kDa		0.028	1_4T1_cell high, 4T1_MV low, 4T1_sEV low	4	3	7	0	0	0	1	1	0	2	0	0
1207	Tubulin gamma-1 chain OS=Mus musculus OX=10090 GN=Tubg1 PE=1 SV=1	P83887	Tubg1	51 kDa		0.00022	1_4T1_cell high, 4T1_MV low, 4T1_sEV low	6	6	6	0	0	0	1	1	0	0	0	1
1208	Low molecular weight phosphotyrosine protein phosphatase OS=Mus musculus OX=10090 GN=Acp1 PE=1 SV=3	Q9D358	Acp1	18 kDa		0.001	1_4T1_cell high, 4T1_MV low, 4T1_sEV low	6	6	8	0	0	0	0	2	1	0	0	1
1209	Cullin-5 OS=Mus musculus OX=10090 GN=Cul5 PE=1 SV=3	Q9D5V5	Cul5	91 kDa		0.012	1_4T1_cell high, 4T1_MV low, 4T1_sEV low	6	8	3	0	0	0	1	1	0	0	0	1
1210	Integrin beta-3 OS=Mus musculus OX=10090 GN=Itgb3 PE=1 SV=2	O54890	Itgb3	87 kDa		0.11	[]	0	0	0	1	1	0	2	0	0	6	7	0
1211	Platelet-activating factor acetylhydrolase IB subunit alpha1 OS=Mus musculus OX=10090 GN=Pafah1b3 PE=1 SV=1	Q61205	Pafah1b3	26 kDa		0.00066	1_4T1_cell high, 4T1_MV low, 4T1_sEV low	6	7	4	0	0	0	0	1	0	0	0	0
1212	Ankyrin repeat domain-containing protein 17 OS=Mus musculus OX=10090 GN=Ankrd17 PE=1 SV=2	Q99NH0	Ankrd17	274 kDa		0.0074	1_4T1_cell high, 4T1_MV low, 4T1_sEV low	7	6	2	0	0	0	0	0	0	0	0	0
1213	Glutamine--fructose-6-phosphate aminotransferase [isomerizing] 1 OS=Mus musculus OX=10090 GN=Gfpt1 PE=1 SV=3	P47856	Gfpt1	79 kDa		0.0014	1_4T1_cell high, 4T1_MV low, 4T1_sEV low	6	7	7	0	0	0	0	0	0	0	0	2
1214	Ribosomal protein S6 kinase alpha-3 OS=Mus musculus OX=10090 GN=Rps6ka3 PE=1 SV=2	P18654	Rps6ka3	84 kDa	TRUE	0.0054	1_4T1_cell high, 4T1_MV low, 4T1_sEV low	8	10	3	0	0	0	0	0	0	0	0	0
1215	SUMO-conjugating enzyme UBC9 OS=Mus musculus OX=10090 GN=Ube2i PE=1 SV=1	P63280	Ube2i	18 kDa		< 0.00010	1_4T1_cell high, 4T1_MV low, 4T1_sEV low	7	8	9	0	0	0	0	0	0	0	0	0
1216	Exportin-7 OS=Mus musculus OX=10090 GN=Xpo7 PE=1 SV=3	Q9EPK7	Xpo7	124 kDa		< 0.00010	1_4T1_cell high, 4T1_MV low, 4T1_sEV low	7	6	6	0	0	0	0	0	0	0	0	0
1217	Transcription elongation regulator 1 OS=Mus musculus OX=10090 GN=Tcerg1 PE=1 SV=2	Q8CGF7	Tcerg1	124 kDa		< 0.00010	1_4T1_cell high, 4T1_MV low, 4T1_sEV low	5	6	8	0	0	0	0	0	0	0	0	0
1218	Methionine aminopeptidase 2 OS=Mus musculus OX=10090 GN=Metap2 PE=1 SV=1	O08663	Metap2	53 kDa		0.00033	1_4T1_cell high, 4T1_MV low, 4T1_sEV low	4	5	10	0	0	0	0	0	0	0	0	0
1219	SWI/SNF complex subunit SMARCC1 OS=Mus musculus OX=10090 GN=Smarcc1 PE=1 SV=2	P97496	Smarcc1	123 kDa	TRUE	0.0022	1_4T1_cell high, 4T1_MV low, 4T1_sEV low	5	4	12	0	0	0	0	0	0	0	0	0
1220	Splicing factor 1 OS=Mus musculus OX=10090 GN=Sf1 PE=1 SV=6	Q64213	Sf1	70 kDa		< 0.00010	1_4T1_cell high, 4T1_MV low, 4T1_sEV low	7	10	7	0	0	0	0	0	0	0	0	0
1221	La-related protein 1 OS=Mus musculus OX=10090 GN=Larp1 PE=1 SV=3	Q6ZQ58	Larp1	121 kDa		< 0.00010	1_4T1_cell high, 4T1_MV low, 4T1_sEV low	4	7	9	0	0	0	0	0	0	0	0	0
1222	Heterogeneous nuclear ribonucleoprotein A0 OS=Mus musculus OX=10090 GN=Hnrnpa0 PE=1 SV=1	Q9CX86	Hnrnpa0	31 kDa		0.0007	1_4T1_cell high, 4T1_MV low, 4T1_sEV low	5	5	12	0	0	0	0	0	0	0	0	0
1223	Mitochondrial import receptor subunit TOM34 OS=Mus musculus OX=10090 GN=Tomm34 PE=1 SV=1	Q9CYG7	Tomm34	34 kDa		< 0.00010	1_4T1_cell high, 4T1_MV low, 4T1_sEV low	8	9	8	0	0	0	0	0	0	0	0	0
1224	RNA binding motif protein, X-linked-like-1 OS=Mus musculus OX=10090 GN=Rbmxl1 PE=2 SV=1	Q91VM5	Rbmxl1	42 kDa		0.16	[]	2	2	17	0	0	0	0	0	0	0	0	0
1225	Prothymosin alpha OS=Mus musculus OX=10090 GN=Ptma PE=1 SV=2	P26350	Ptma	12 kDa		0.16	[]	2	3	21	0	0	0	0	0	0	0	0	0
1226	Lamin-B2 OS=Mus musculus OX=10090 GN=Lmnb2 PE=1 SV=2	P21619	Lmnb2	67 kDa	TRUE	0.16	[]	3	0	12	0	0	0	0	0	0	0	0	0
1227	Electrogenic aspartate/glutamate antiporter SLC25A12, mitochondrial OS=Mus musculus OX=10090 GN=Slc25a12 PE=1 SV=1	S2512_MOUSE	Slc25a12	?	TRUE	0.052	[]	11	11	0	0	0	0	0	0	0	0	0	0
1228	Zinc transporter ZIP10 OS=Mus musculus OX=10090 GN=Slc39a10 PE=1 SV=1	Q6P5F6	Slc39a10	94 kDa		0.21	[]	0	0	0	1	1	0	2	1	6	4	5	3
1229	Programmed cell death protein 10 OS=Mus musculus OX=10090 GN=Pdcd10 PE=1 SV=1	Q8VE70	Pdcd10	25 kDa		0.02	1_4T1_cell low, 4T1_MV high, 4T1_sEV low	3	3	2	0	0	0	4	4	5	1	0	2
1230	Tyrosine-protein kinase receptor UFO OS=Mus musculus OX=10090 GN=Axl PE=1 SV=2	Q00993	Axl	98 kDa		0.017	1_4T1_cell low, 4T1_MV low, 4T1_sEV high	0	0	0	2	2	0	2	2	0	3	6	4
1231	Cdc42-interacting protein 4 OS=Mus musculus OX=10090 GN=Trip10 PE=1 SV=2	Q8CJ53	Trip10	68 kDa		0.34	[]	3	2	6	0	0	0	3	3	0	1	4	0
1232	Leucine-rich repeats and immunoglobulin-like domains protein 1 OS=Mus musculus OX=10090 GN=Lrig1 PE=1 SV=2	P70193	Lrig1	119 kDa		0.53	[]	0	0	0	0	6	0	2	2	0	2	4	2
1233	NAD(P) transhydrogenase, mitochondrial OS=Mus musculus OX=10090 GN=Nnt PE=1 SV=2	Q61941	Nnt	114 kDa		< 0.00010	1_4T1_cell high, 4T1_MV low, 4T1_sEV low	4	5	1	3	4	1	0	1	0	0	0	0
1234	Alpha-mannosidase 2 OS=Mus musculus OX=10090 GN=Man2a1 PE=1 SV=2	P27046	Man2a1	132 kDa		0.52	[]	5	5	1	0	0	4	0	0	0	0	1	1
1235	Calcium/calmodulin-dependent protein kinase type II subunit delta OS=Mus musculus OX=10090 GN=Camk2d PE=1 SV=1	Q6PHZ2	Camk2d	56 kDa	TRUE	0.067	[]	7	6	3	0	0	0	1	2	0	0	0	2
1236	Protein FAM234A OS=Mus musculus OX=10090 GN=Fam234a PE=1 SV=1	Q8C0Z1	Fam234a	61 kDa		0.00029	1_4T1_cell low, 4T1_MV high, 4T1_sEV high	0	0	0	0	0	0	2	3	3	6	6	4
1237	ADP-ribosylation factor-like protein 3 OS=Mus musculus OX=10090 GN=Arl3 PE=1 SV=1	Q9WUL7	Arl3	20 kDa		0.019	1_4T1_cell high, 4T1_MV high, 4T1_sEV low	2	4	7	0	0	0	2	2	0	0	0	0
1238	Serine/threonine-protein kinase MRCK beta OS=Mus musculus OX=10090 GN=Cdc42bpb PE=1 SV=2	Q7TT50	Cdc42bpb	195 kDa	TRUE	0.36	[]	0	0	5	0	0	0	6	2	0	1	2	0
1239	H/ACA ribonucleoprotein complex subunit DKC1 OS=Mus musculus OX=10090 GN=Dkc1 PE=1 SV=4	Q9ESX5	Dkc1	57 kDa		0.018	1_4T1_cell high, 4T1_MV low, 4T1_sEV low	2	4	9	0	0	0	0	0	0	0	1	1
1240	MYG1 exonuclease OS=Mus musculus OX=10090 GN=Myg1 PE=1 SV=1	Q9JK81	Myg1	43 kDa		0.0041	1_4T1_cell high, 4T1_MV low, 4T1_sEV low	8	7	6	1	2	0	0	0	0	0	0	0
1241	Nuclear protein localization protein 4 homolog OS=Mus musculus OX=10090 GN=Nploc4 PE=1 SV=3	P60670	Nploc4	68 kDa		0.0028	1_4T1_cell high, 4T1_MV low, 4T1_sEV low	5	7	6	0	0	0	0	0	1	0	0	1
1242	Serine/threonine-protein phosphatase 2A activator OS=Mus musculus OX=10090 GN=Ptpa PE=1 SV=1	P58389	Ptpa	37 kDa		0.027	1_4T1_cell high, 4T1_MV low, 4T1_sEV low	3	5	8	0	0	0	0	3	0	0	0	0
1243	ADP-ribosylation factor-binding protein GGA1 OS=Mus musculus OX=10090 GN=Gga1 PE=1 SV=1	Q8R0H9	Gga1	70 kDa	TRUE	0.0008	1_4T1_cell high, 4T1_MV low, 4T1_sEV low	5	8	4	0	0	0	0	0	0	0	0	0
1244	E3 ubiquitin-protein ligase TRIM47 OS=Mus musculus OX=10090 GN=Trim47 PE=1 SV=2	Q8C0E3	Trim47	70 kDa		0.00013	1_4T1_cell low, 4T1_MV low, 4T1_sEV high	0	0	2	0	0	0	0	0	0	8	10	4
1245	Cullin-1 OS=Mus musculus OX=10090 GN=Cul1 PE=1 SV=1	Q9WTX6	Cul1	90 kDa		< 0.00010	1_4T1_cell high, 4T1_MV low, 4T1_sEV low	7	8	8	0	0	0	1	0	0	0	0	0
1246	Signal recognition particle 54 kDa protein OS=Mus musculus OX=10090 GN=Srp54 PE=1 SV=2	P14576	Srp54	56 kDa		< 0.00010	1_4T1_cell high, 4T1_MV low, 4T1_sEV low	7	8	7	0	0	0	0	0	0	0	0	0
1247	Early endosome antigen 1 OS=Mus musculus OX=10090 GN=Eea1 PE=1 SV=2	Q8BL66	Eea1	161 kDa		0.00011	1_4T1_cell high, 4T1_MV low, 4T1_sEV low	7	8	5	0	0	0	0	0	0	0	0	0
1248	U1 small nuclear ribonucleoprotein 70 kDa OS=Mus musculus OX=10090 GN=Snrnp70 PE=1 SV=2	Q62376	Snrnp70	52 kDa		0.012	1_4T1_cell high, 4T1_MV low, 4T1_sEV low	4	3	12	0	0	0	0	0	0	0	0	0
1249	AP-3 complex subunit delta-1 OS=Mus musculus OX=10090 GN=Ap3d1 PE=1 SV=1	O54774	Ap3d1	135 kDa		< 0.00010	1_4T1_cell high, 4T1_MV low, 4T1_sEV low	7	9	7	0	0	0	0	0	0	0	0	0
1250	Microtubule-associated protein 1B OS=Mus musculus OX=10090 GN=Map1b PE=1 SV=2	P14873	Map1b	270 kDa		0.00061	1_4T1_cell high, 4T1_MV low, 4T1_sEV low	4	7	12	0	0	0	0	0	0	0	0	0
1251	Ubiquilin-1 OS=Mus musculus OX=10090 GN=Ubqln1 PE=1 SV=1	Q8R317	Ubqln1	62 kDa	TRUE	< 0.00010	1_4T1_cell high, 4T1_MV low, 4T1_sEV low	7	8	6	0	0	0	0	0	0	0	0	0
1252	Inosine triphosphate pyrophosphatase OS=Mus musculus OX=10090 GN=Itpa PE=1 SV=2	Q9D892	Itpa	22 kDa		< 0.00010	1_4T1_cell high, 4T1_MV low, 4T1_sEV low	9	8	7	0	0	0	0	0	0	0	0	0
1253	AH receptor-interacting protein OS=Mus musculus OX=10090 GN=Aip PE=1 SV=1	O08915	Aip	38 kDa		< 0.00010	1_4T1_cell high, 4T1_MV low, 4T1_sEV low	5	7	8	0	0	0	0	0	0	0	0	0
1254	Cellular nucleic acid-binding protein OS=Mus musculus OX=10090 GN=Cnbp PE=1 SV=2	P53996	Cnbp	20 kDa		< 0.00010	1_4T1_cell high, 4T1_MV low, 4T1_sEV low	7	8	8	0	0	0	0	0	0	0	0	0
1255	Complex I assembly factor ACAD9, mitochondrial OS=Mus musculus OX=10090 GN=Acad9 PE=1 SV=2	Q8JZN5	Acad9	69 kDa		< 0.00010	1_4T1_cell high, 4T1_MV low, 4T1_sEV low	9	9	7	0	0	0	0	0	0	0	0	0
1256	Peptidyl-tRNA hydrolase 2, mitochondrial OS=Mus musculus OX=10090 GN=Ptrh2 PE=1 SV=1	Q8R2Y8	Ptrh2	20 kDa		< 0.00010	1_4T1_cell high, 4T1_MV low, 4T1_sEV low	6	8	9	0	0	0	0	0	0	0	0	0
1257	Heterogeneous nuclear ribonucleoprotein L-like OS=Mus musculus OX=10090 GN=Hnrnpll PE=1 SV=3	Q921F4	Hnrnpll	64 kDa		0.0032	1_4T1_cell high, 4T1_MV low, 4T1_sEV low	7	3	12	0	0	0	0	0	0	0	0	0
1258	Splicing factor 3A subunit 3 OS=Mus musculus OX=10090 GN=Sf3a3 PE=1 SV=2	Q9D554	Sf3a3	59 kDa		< 0.00010	1_4T1_cell high, 4T1_MV low, 4T1_sEV low	4	5	9	0	0	0	0	0	0	0	0	0
1259	Protein RRP5 homolog OS=Mus musculus OX=10090 GN=Pdcd11 PE=1 SV=2	Q6NS46	Pdcd11	208 kDa		0.32	[]	0	2	21	0	0	0	0	0	0	0	0	0
1260	Aldehyde dehydrogenase, dimeric NADP-preferring OS=Mus musculus OX=10090 GN=Aldh3a1 PE=1 SV=2	P47739	Aldh3a1	50 kDa	TRUE	0.094	[]	8	8	0	1	0	0	0	0	0	0	0	0
1261	Protein transport protein Sec61 subunit alpha isoform 1 OS=Mus musculus OX=10090 GN=Sec61a1 PE=1 SV=2	P61620	Sec61a1	52 kDa	TRUE	0.24	[]	1	3	7	1	1	2	0	0	1	0	0	0
1262	Vacuolar-sorting protein SNF8 OS=Mus musculus OX=10090 GN=Snf8 PE=1 SV=1	Q9CZ28	Snf8	29 kDa		0.00034	1_4T1_cell low, 4T1_MV low, 4T1_sEV high	2	2	0	0	0	0	1	1	0	7	6	3
1263	Ankycorbin OS=Mus musculus OX=10090 GN=Rai14 PE=1 SV=1	Q9EP71	Rai14	109 kDa		0.053	[]	5	5	1	1	1	0	0	0	0	0	0	0
1264	Serine/arginine-rich splicing factor 6 OS=Mus musculus OX=10090 GN=Srsf6 PE=1 SV=1	Q3TWW8	Srsf6	39 kDa	TRUE	< 0.00010	1_4T1_cell high, 4T1_MV low, 4T1_sEV low	4	4	5	0	0	0	0	0	0	1	1	0
1265	Biliverdin reductase A OS=Mus musculus OX=10090 GN=Blvra PE=1 SV=1	Q9CY64	Blvra	34 kDa		0.0037	1_4T1_cell high, 4T1_MV low, 4T1_sEV low	7	7	3	0	0	0	0	1	0	0	0	0
1266	Mitochondrial-processing peptidase subunit beta OS=Mus musculus OX=10090 GN=Pmpcb PE=1 SV=1	Q9CXT8	Pmpcb	55 kDa	TRUE	0.00076	1_4T1_cell high, 4T1_MV low, 4T1_sEV low	6	8	6	1	0	0	0	0	0	0	0	0
1267	Arylsulfatase B OS=Mus musculus OX=10090 GN=Arsb PE=1 SV=3	P50429	Arsb	60 kDa		0.00033	1_4T1_cell high, 4T1_MV low, 4T1_sEV low	1	0	0	6	8	1	0	0	0	0	0	0
1268	3-ketoacyl-CoA thiolase A, peroxisomal OS=Mus musculus OX=10090 GN=Acaa1a PE=1 SV=1	Q921H8	Acaa1a	44 kDa		< 0.00010	1_4T1_cell high, 4T1_MV low, 4T1_sEV low	7	7	6	0	0	0	0	1	0	0	0	0
1269	NudC domain-containing protein 1 OS=Mus musculus OX=10090 GN=Nudcd1 PE=1 SV=2	Q6PIP5	Nudcd1	67 kDa		0.0011	1_4T1_cell high, 4T1_MV low, 4T1_sEV low	3	6	10	0	0	0	0	0	0	0	0	0
1270	Huntingtin-interacting protein 1 OS=Mus musculus OX=10090 GN=Hip1 PE=1 SV=2	Q8VD75	Hip1	115 kDa		0.00025	1_4T1_cell high, 4T1_MV low, 4T1_sEV low	6	3	6	0	0	0	0	0	0	0	0	0
1271	E3 ubiquitin-protein ligase TRIP12 OS=Mus musculus OX=10090 GN=Trip12 PE=1 SV=1	G5E870	Trip12	224 kDa		< 0.00010	1_4T1_cell high, 4T1_MV low, 4T1_sEV low	4	7	8	0	0	0	0	0	0	0	0	0
1272	26S proteasome non-ATPase regulatory subunit 14 OS=Mus musculus OX=10090 GN=Psmd14 PE=1 SV=2	O35593	Psmd14	35 kDa		0.011	1_4T1_cell high, 4T1_MV low, 4T1_sEV low	7	9	2	0	0	0	0	0	0	0	0	0
1273	Replication factor C subunit 4 OS=Mus musculus OX=10090 GN=Rfc4 PE=1 SV=1	Q99J62	Rfc4	40 kDa		0.00033	1_4T1_cell high, 4T1_MV low, 4T1_sEV low	4	5	10	0	0	0	0	0	0	0	0	0
1274	Nuclear pore complex protein Nup107 OS=Mus musculus OX=10090 GN=Nup107 PE=1 SV=1	Q8BH74	Nup107	107 kDa		< 0.00010	1_4T1_cell high, 4T1_MV low, 4T1_sEV low	4	8	7	0	0	0	0	0	0	0	0	0
1275	Peptidyl-prolyl cis-trans isomerase FKBP8 OS=Mus musculus OX=10090 GN=Fkbp8 PE=1 SV=2	O35465	Fkbp8	44 kDa		< 0.00010	1_4T1_cell high, 4T1_MV low, 4T1_sEV low	5	7	6	0	0	0	0	0	0	0	0	0
1276	SRSF protein kinase 1 OS=Mus musculus OX=10090 GN=Srpk1 PE=1 SV=2	O70551	Srpk1	73 kDa	TRUE	< 0.00010	1_4T1_cell high, 4T1_MV low, 4T1_sEV low	5	6	10	0	0	0	0	0	0	0	0	0
1277	Protein LYRIC OS=Mus musculus OX=10090 GN=Mtdh PE=1 SV=1	Q80WJ7	Mtdh	64 kDa		< 0.00010	1_4T1_cell high, 4T1_MV low, 4T1_sEV low	7	9	8	0	0	0	0	0	0	0	0	0
1278	Microtubule-associated protein 1S OS=Mus musculus OX=10090 GN=Map1s PE=1 SV=2	Q8C052	Map1s	103 kDa		< 0.00010	1_4T1_cell high, 4T1_MV low, 4T1_sEV low	6	6	9	0	0	0	0	0	0	0	0	0
1279	Histone PARylation factor 1 OS=Mus musculus OX=10090 GN=Hpf1 PE=1 SV=1	Q8CFE2	Hpf1	39 kDa		< 0.00010	1_4T1_cell high, 4T1_MV low, 4T1_sEV low	7	5	9	0	0	0	0	0	0	0	0	0
1280	ATP-dependent RNA helicase DHX30 OS=Mus musculus OX=10090 GN=Dhx30 PE=1 SV=1	Q99PU8	Dhx30	137 kDa		< 0.00010	1_4T1_cell high, 4T1_MV low, 4T1_sEV low	5	7	10	0	0	0	0	0	0	0	0	0
1281	MMS19 nucleotide excision repair protein homolog OS=Mus musculus OX=10090 GN=Mms19 PE=1 SV=1	Q9D071	Mms19	113 kDa		< 0.00010	1_4T1_cell high, 4T1_MV low, 4T1_sEV low	5	6	9	0	0	0	0	0	0	0	0	0
1282	Electron transfer flavoprotein subunit beta OS=Mus musculus OX=10090 GN=Etfb PE=1 SV=3	Q9DCW4	Etfb	28 kDa		< 0.00010	1_4T1_cell high, 4T1_MV low, 4T1_sEV low	6	8	7	0	0	0	0	0	0	0	0	0
1283	Squamous cell carcinoma antigen recognized by T-cells 3 OS=Mus musculus OX=10090 GN=Sart3 PE=1 SV=1	Q9JLI8	Sart3	110 kDa		< 0.00010	1_4T1_cell high, 4T1_MV low, 4T1_sEV low	5	4	8	0	0	0	0	0	0	0	0	0
1284	SWI/SNF complex subunit SMARCC2 OS=Mus musculus OX=10090 GN=Smarcc2 PE=1 SV=2	Q6PDG5	Smarcc2	133 kDa	TRUE	< 0.00010	1_4T1_cell high, 4T1_MV low, 4T1_sEV low	6	5	11	0	0	0	0	0	0	0	0	0
1285	Lysosomal acid glucosylceramidase OS=Mus musculus OX=10090 GN=Gba1 PE=1 SV=1	GBA1_MOUSE	Gba1	?		0.067	[]	0	0	0	5	9	0	0	0	0	0	0	0
1286	Plasminogen activator inhibitor 1 OS=Mus musculus OX=10090 GN=Serpine1 PE=1 SV=1	P22777	Serpine1	45 kDa		0.12	[]	0	0	0	6	5	0	2	1	1	2	2	1
1287	Nuclear transport factor 2 OS=Mus musculus OX=10090 GN=Nutf2 PE=1 SV=1	P61971	Nutf2	14 kDa		0.0053	1_4T1_cell high, 4T1_MV low, 4T1_sEV low	4	5	7	1	1	0	1	1	1	0	0	0
1288	Vesicle-trafficking protein SEC22b OS=Mus musculus OX=10090 GN=Sec22b PE=1 SV=3	O08547	Sec22b	25 kDa		0.029	1_4T1_cell high, 4T1_MV low, 4T1_sEV low	5	6	5	1	2	0	0	0	0	1	0	1
1289	Receptor-type tyrosine-protein phosphatase F OS=Mus musculus OX=10090 GN=Ptprf PE=1 SV=1	A2A8L5	Ptprf	211 kDa	TRUE	0.18	[]	0	0	0	0	3	0	0	1	0	3	5	1
1290	Twinfilin-2 OS=Mus musculus OX=10090 GN=Twf2 PE=1 SV=1	Q9Z0P5	Twf2	39 kDa	TRUE	0.0038	1_4T1_cell high, 4T1_MV high, 4T1_sEV low	5	5	6	0	0	0	3	2	0	0	0	0
1291	3-hydroxyisobutyrate dehydrogenase, mitochondrial OS=Mus musculus OX=10090 GN=Hibadh PE=1 SV=1	Q99L13	Hibadh	35 kDa		0.087	[]	7	4	2	4	4	0	0	0	0	0	0	0
1292	Transcriptional activator protein Pur-beta OS=Mus musculus OX=10090 GN=Purb PE=1 SV=3	O35295	Purb	34 kDa		0.21	[]	5	3	8	0	0	0	0	1	0	0	0	4
1293	Nidogen-1 OS=Mus musculus OX=10090 GN=Nid1 PE=1 SV=2	P10493	Nid1	137 kDa	TRUE	0.016	1_4T1_cell low, 4T1_MV low, 4T1_sEV high	0	0	0	0	0	0	4	0	0	8	6	2
1294	Fatty acyl-CoA reductase 1 OS=Mus musculus OX=10090 GN=Far1 PE=1 SV=1	Q922J9	Far1	59 kDa		< 0.00010	1_4T1_cell high, 4T1_MV low, 4T1_sEV low	6	7	6	0	0	0	0	1	0	0	0	0
1295	Pre-mRNA-processing factor 6 OS=Mus musculus OX=10090 GN=Prpf6 PE=1 SV=1	Q91YR7	Prpf6	107 kDa		0.037	1_4T1_cell high, 4T1_MV low, 4T1_sEV low	2	3	11	0	0	0	0	0	0	0	0	0
1296	Constitutive coactivator of PPAR-gamma-like protein 1 OS=Mus musculus OX=10090 GN=FAM120A PE=1 SV=2	Q6A0A9	FAM120A	122 kDa		< 0.00010	1_4T1_cell high, 4T1_MV low, 4T1_sEV low	3	4	6	0	0	0	0	0	0	0	0	0
1297	Protein SEC13 homolog OS=Mus musculus OX=10090 GN=Sec13 PE=1 SV=3	Q9D1M0	Sec13	36 kDa		< 0.00010	1_4T1_cell high, 4T1_MV low, 4T1_sEV low	7	6	8	0	0	0	0	0	0	0	0	0
1298	TBC1 domain family member 15 OS=Mus musculus OX=10090 GN=Tbc1d15 PE=1 SV=1	Q9CXF4	Tbc1d15	77 kDa		< 0.00010	1_4T1_cell high, 4T1_MV low, 4T1_sEV low	7	7	6	0	0	0	0	0	0	0	0	0
1299	Very long-chain specific acyl-CoA dehydrogenase, mitochondrial OS=Mus musculus OX=10090 GN=Acadvl PE=1 SV=3	P50544	Acadvl	71 kDa		< 0.00010	1_4T1_cell high, 4T1_MV low, 4T1_sEV low	5	6	9	0	0	0	0	0	0	0	0	0
1300	Protein O-GlcNAcase OS=Mus musculus OX=10090 GN=Oga PE=1 SV=2	Q9EQQ9	Oga	103 kDa		0.0065	1_4T1_cell high, 4T1_MV low, 4T1_sEV low	5	7	2	0	0	0	0	0	0	0	0	0
1301	Phosphoribosyl pyrophosphate synthase-associated protein 2 OS=Mus musculus OX=10090 GN=Prpsap2 PE=1 SV=1	Q8R574	Prpsap2	41 kDa	TRUE	0.0041	1_4T1_cell high, 4T1_MV low, 4T1_sEV low	9	5	4	0	0	0	0	0	0	0	0	0
1302	Brefeldin A-inhibited guanine nucleotide-exchange protein 1 OS=Mus musculus OX=10090 GN=Arfgef1 PE=1 SV=1	G3X9K3	Arfgef1	209 kDa	TRUE	< 0.00010	1_4T1_cell high, 4T1_MV low, 4T1_sEV low	4	6	5	0	0	0	0	0	0	0	0	0
1303	Nucleoporin Nup37 OS=Mus musculus OX=10090 GN=Nup37 PE=1 SV=2	Q9CWU9	Nup37	37 kDa		0.013	1_4T1_cell high, 4T1_MV low, 4T1_sEV low	1	2	5	0	0	0	0	0	0	0	0	0
1304	E3 ubiquitin/ISG15 ligase TRIM25 OS=Mus musculus OX=10090 GN=Trim25 PE=1 SV=2	Q61510	Trim25	72 kDa		< 0.00010	1_4T1_cell high, 4T1_MV low, 4T1_sEV low	6	7	6	0	0	0	0	0	0	0	0	0
1305	Sec1 family domain-containing protein 1 OS=Mus musculus OX=10090 GN=Scfd1 PE=1 SV=1	Q8BRF7	Scfd1	72 kDa		< 0.00010	1_4T1_cell high, 4T1_MV low, 4T1_sEV low	7	8	6	0	0	0	0	0	0	0	0	0
1306	Dynein assembly factor 5, axonemal OS=Mus musculus OX=10090 GN=Dnaaf5 PE=1 SV=1	B9EJR8	Dnaaf5	94 kDa		0.00029	1_4T1_cell high, 4T1_MV low, 4T1_sEV low	3	7	7	0	0	0	0	0	0	0	0	0
1307	NEDD8 ultimate buster 1 OS=Mus musculus OX=10090 GN=Nub1 PE=1 SV=2	P54729	Nub1	70 kDa		< 0.00010	1_4T1_cell high, 4T1_MV low, 4T1_sEV low	8	8	6	0	0	0	0	0	0	0	0	0
1308	Endoplasmic reticulum resident protein 29 OS=Mus musculus OX=10090 GN=Erp29 PE=1 SV=2	P57759	Erp29	29 kDa		< 0.00010	1_4T1_cell high, 4T1_MV low, 4T1_sEV low	7	6	7	0	0	0	0	0	0	0	0	0
1309	U2 snRNP-associated SURP motif-containing protein OS=Mus musculus OX=10090 GN=U2surp PE=1 SV=3	Q6NV83	U2surp	118 kDa		< 0.00010	1_4T1_cell high, 4T1_MV low, 4T1_sEV low	4	5	8	0	0	0	0	0	0	0	0	0
1310	Protein FAM98B OS=Mus musculus OX=10090 GN=Fam98b PE=1 SV=1	Q80VD1	Fam98b	45 kDa		0.0018	1_4T1_cell high, 4T1_MV low, 4T1_sEV low	5	10	5	0	0	0	0	0	0	0	0	0
1311	Phosphatidylinositol-3-phosphatase SAC1 OS=Mus musculus OX=10090 GN=Sacm1l PE=1 SV=1	Q9EP69	Sacm1l	67 kDa		0.0001	1_4T1_cell high, 4T1_MV low, 4T1_sEV low	5	4	9	0	0	0	0	0	0	0	0	0
1312	Nuclear pore complex protein Nup160 OS=Mus musculus OX=10090 GN=Nup160 PE=1 SV=2	Q9Z0W3	Nup160	158 kDa		< 0.00010	1_4T1_cell high, 4T1_MV low, 4T1_sEV low	6	7	5	0	0	0	0	0	0	0	0	0
1313	Serine protease inhibitor A3K OS=Mus musculus OX=10090 GN=Serpina3k PE=1 SV=2	P07759	Serpina3k	47 kDa		0.44	[]	0	0	0	0	0	18	0	0	0	0	0	0
1314	Alpha-1-antitrypsin 1-1 OS=Mus musculus OX=10090 GN=Serpina1a PE=1 SV=4	P07758 (+1)	Serpina1a	46 kDa	TRUE	0.44	[]	0	0	0	0	0	18	0	0	0	0	0	0
1315	CCN family member 2 OS=Mus musculus OX=10090 GN=Ccn2 PE=2 SV=3	P29268	Ccn2	38 kDa		0.0011	1_4T1_cell low, 4T1_MV low, 4T1_sEV high	0	0	0	1	1	0	3	1	1	5	4	3
1316	SHC SH2 domain-binding protein 1 OS=Mus musculus OX=10090 GN=Shcbp1 PE=1 SV=1	Q9Z179	Shcbp1	76 kDa		0.21	[]	2	3	1	0	0	0	3	7	0	1	1	0
1317	Syndecan-1 OS=Mus musculus OX=10090 GN=Sdc1 PE=1 SV=1	P18828	Sdc1	33 kDa		0.13	[]	0	0	0	0	0	0	1	1	2	3	2	10
1318	Mixed lineage kinase domain-like protein OS=Mus musculus OX=10090 GN=Mlkl PE=1 SV=1	Q9D2Y4	Mlkl	54 kDa		0.019	1_4T1_cell high, 4T1_MV low, 4T1_sEV low	2	3	6	0	0	0	1	1	0	0	1	0
1319	Ephrin-B2 OS=Mus musculus OX=10090 GN=Efnb2 PE=1 SV=1	P52800	Efnb2	37 kDa		0.0087	1_4T1_cell low, 4T1_MV low, 4T1_sEV high	0	0	0	0	0	0	0	1	2	4	3	5
1320	UMP-CMP kinase OS=Mus musculus OX=10090 GN=Cmpk1 PE=1 SV=1	Q9DBP5	Cmpk1	22 kDa		< 0.00010	1_4T1_cell high, 4T1_MV low, 4T1_sEV low	6	5	6	0	0	0	1	1	0	0	0	0
1321	DNA-directed RNA polymerase II subunit RPB1 OS=Mus musculus OX=10090 GN=Polr2a PE=1 SV=3	P08775	Polr2a	217 kDa		0.35	[]	2	2	8	0	0	0	0	0	0	0	0	4
1322	Ladinin-1 OS=Mus musculus OX=10090 GN=Lad1 PE=1 SV=1	P57016	Lad1	59 kDa		0.12	[]	1	1	7	0	0	0	0	0	0	0	0	0
1323	A disintegrin and metalloproteinase with thrombospondin motifs 1 OS=Mus musculus OX=10090 GN=Adamts1 PE=1 SV=4	P97857	Adamts1	106 kDa		0.014	1_4T1_cell low, 4T1_MV low, 4T1_sEV high	0	0	0	0	0	0	2	0	0	9	5	2
1324	Cleavage and polyadenylation specificity factor subunit 6 OS=Mus musculus OX=10090 GN=Cpsf6 PE=1 SV=1	Q6NVF9	Cpsf6	59 kDa		< 0.00010	1_4T1_cell high, 4T1_MV low, 4T1_sEV low	6	6	5	0	0	0	0	0	0	0	1	0
1325	Kinesin-like protein KIF14 OS=Mus musculus OX=10090 GN=Kif14 PE=1 SV=1	L0N7N1	Kif14	186 kDa	TRUE	0.084	[]	1	0	0	0	0	0	7	12	0	0	0	0
1326	Hydroxyacyl-coenzyme A dehydrogenase, mitochondrial OS=Mus musculus OX=10090 GN=Hadh PE=1 SV=2	Q61425	Hadh	34 kDa		0.00057	1_4T1_cell high, 4T1_MV low, 4T1_sEV low	6	8	4	0	0	0	0	0	0	0	0	0
1327	Serpin B5 OS=Mus musculus OX=10090 GN=Serpinb5 PE=1 SV=1	P70124	Serpinb5	42 kDa		0.023	1_4T1_cell high, 4T1_MV low, 4T1_sEV low	7	6	1	0	0	0	0	0	0	0	0	0
1328	Protein Hook homolog 3 OS=Mus musculus OX=10090 GN=Hook3 PE=1 SV=2	Q8BUK6	Hook3	83 kDa		< 0.00010	1_4T1_cell high, 4T1_MV low, 4T1_sEV low	6	6	7	0	0	0	0	0	0	0	0	0
1329	Myelin expression factor 2 OS=Mus musculus OX=10090 GN=Myef2 PE=1 SV=1	Q8C854	Myef2	63 kDa		< 0.00010	1_4T1_cell high, 4T1_MV low, 4T1_sEV low	5	4	7	0	0	0	0	0	0	0	0	0
1330	Bifunctional 3'-phosphoadenosine 5'-phosphosulfate synthase 1 OS=Mus musculus OX=10090 GN=Papss1 PE=1 SV=1	Q60967	Papss1	71 kDa		0.0004	1_4T1_cell high, 4T1_MV low, 4T1_sEV low	7	7	4	0	0	0	0	0	0	0	0	0
1331	Replication protein A 70 kDa DNA-binding subunit OS=Mus musculus OX=10090 GN=Rpa1 PE=1 SV=1	Q8VEE4	Rpa1	69 kDa		< 0.00010	1_4T1_cell high, 4T1_MV low, 4T1_sEV low	4	6	6	0	0	0	0	0	0	0	0	0
1332	Dual specificity mitogen-activated protein kinase kinase 3 OS=Mus musculus OX=10090 GN=Map2k3 PE=1 SV=2	O09110	Map2k3	39 kDa		< 0.00010	1_4T1_cell high, 4T1_MV low, 4T1_sEV low	7	6	7	0	0	0	0	0	0	0	0	0
1333	DNA polymerase alpha catalytic subunit OS=Mus musculus OX=10090 GN=Pola1 PE=1 SV=2	P33609	Pola1	167 kDa		< 0.00010	1_4T1_cell high, 4T1_MV low, 4T1_sEV low	5	7	5	0	0	0	0	0	0	0	0	0
1334	Ubiquitin carboxyl-terminal hydrolase 4 OS=Mus musculus OX=10090 GN=Usp4 PE=1 SV=3	P35123	Usp4	108 kDa	TRUE	0.00036	1_4T1_cell high, 4T1_MV low, 4T1_sEV low	3	7	8	0	0	0	0	0	0	0	0	0
1335	Zinc transporter ZIP4 OS=Mus musculus OX=10090 GN=Slc39a4 PE=1 SV=1	Q78IQ7	Slc39a4	71 kDa		0.00041	1_4T1_cell low, 4T1_MV low, 4T1_sEV high	1	0	1	1	1	0	0	1	1	4	5	4
1336	Unconventional myosin-Va OS=Mus musculus OX=10090 GN=Myo5a PE=1 SV=2	Q99104	Myo5a	216 kDa		0.27	[]	2	1	3	0	0	0	6	2	0	1	1	0
1337	Retinol dehydrogenase 11 OS=Mus musculus OX=10090 GN=Rdh11 PE=1 SV=2	Q9QYF1	Rdh11	35 kDa		0.00016	1_4T1_cell high, 4T1_MV low, 4T1_sEV low	6	5	6	0	0	0	1	1	0	0	1	0
1338	Succinate-semialdehyde dehydrogenase, mitochondrial OS=Mus musculus OX=10090 GN=Aldh5a1 PE=1 SV=1	Q8BWF0	Aldh5a1	56 kDa		0.00061	1_4T1_cell high, 4T1_MV low, 4T1_sEV low	2	1	0	7	6	1	0	0	0	0	0	0
1339	Aspartyl aminopeptidase OS=Mus musculus OX=10090 GN=Dnpep PE=1 SV=2	Q9Z2W0	Dnpep	52 kDa		0.0036	1_4T1_cell high, 4T1_MV low, 4T1_sEV low	5	7	3	0	0	0	1	1	0	0	0	0
1340	Very-long-chain 3-oxoacyl-CoA reductase OS=Mus musculus OX=10090 GN=Hsd17b12 PE=1 SV=1	O70503	Hsd17b12	35 kDa		0.016	1_4T1_cell high, 4T1_MV low, 4T1_sEV low	3	3	7	0	0	0	0	2	0	0	0	0
1341	rRNA 2'-O-methyltransferase fibrillarin OS=Mus musculus OX=10090 GN=Fbl PE=1 SV=2	P35550	Fbl	34 kDa		0.094	[]	2	3	9	0	0	0	0	0	0	0	0	2
1342	Unconventional myosin-XVIIIa OS=Mus musculus OX=10090 GN=Myo18a PE=1 SV=2	Q9JMH9	Myo18a	233 kDa		0.00069	1_4T1_cell high, 4T1_MV low, 4T1_sEV low	3	7	5	0	0	0	0	0	0	0	0	0
1343	Lysosomal protective protein OS=Mus musculus OX=10090 GN=Ctsa PE=1 SV=1	P16675	Ctsa	54 kDa		0.057	[]	1	0	1	7	10	0	0	0	0	0	0	0
1344	Replication factor C subunit 1 OS=Mus musculus OX=10090 GN=Rfc1 PE=1 SV=2	P35601	Rfc1	126 kDa		< 0.00010	1_4T1_cell high, 4T1_MV low, 4T1_sEV low	5	5	6	0	0	0	0	0	0	0	0	0
1345	Mitotic spindle assembly checkpoint protein MAD2A OS=Mus musculus OX=10090 GN=Mad2l1 PE=1 SV=2	Q9Z1B5	Mad2l1	24 kDa		< 0.00010	1_4T1_cell high, 4T1_MV low, 4T1_sEV low	3	3	6	0	0	0	0	0	0	0	0	0
1346	Ubiquitin carboxyl-terminal hydrolase 47 OS=Mus musculus OX=10090 GN=Usp47 PE=1 SV=2	Q8BY87	Usp47	157 kDa		< 0.00010	1_4T1_cell high, 4T1_MV low, 4T1_sEV low	7	5	9	0	0	0	0	0	0	0	0	0
1347	NEDD8-activating enzyme E1 catalytic subunit OS=Mus musculus OX=10090 GN=Uba3 PE=1 SV=2	Q8C878	Uba3	52 kDa		0.0024	1_4T1_cell high, 4T1_MV low, 4T1_sEV low	7	5	3	0	0	0	0	0	0	0	0	0
1348	Histone acetyltransferase type B catalytic subunit OS=Mus musculus OX=10090 GN=Hat1 PE=1 SV=1	Q8BY71	Hat1	49 kDa		< 0.00010	1_4T1_cell high, 4T1_MV low, 4T1_sEV low	5	6	7	0	0	0	0	0	0	0	0	0
1349	Condensin complex subunit 2 OS=Mus musculus OX=10090 GN=Ncaph PE=1 SV=1	Q8C156	Ncaph	82 kDa		< 0.00010	1_4T1_cell high, 4T1_MV low, 4T1_sEV low	4	4	6	0	0	0	0	0	0	0	0	0
1350	DCC-interacting protein 13-alpha OS=Mus musculus OX=10090 GN=Appl1 PE=1 SV=1	Q8K3H0	Appl1	79 kDa		0.00013	1_4T1_cell high, 4T1_MV low, 4T1_sEV low	4	3	7	0	0	0	0	0	0	0	0	0
1351	Replication factor C subunit 3 OS=Mus musculus OX=10090 GN=Rfc3 PE=1 SV=1	Q8R323	Rfc3	41 kDa		< 0.00010	1_4T1_cell high, 4T1_MV low, 4T1_sEV low	5	5	6	0	0	0	0	0	0	0	0	0
1352	Mitochondrial import inner membrane translocase subunit TIM50 OS=Mus musculus OX=10090 GN=Timm50 PE=1 SV=1	Q9D880	Timm50	40 kDa		< 0.00010	1_4T1_cell high, 4T1_MV low, 4T1_sEV low	5	4	7	0	0	0	0	0	0	0	0	0
1353	STE20/SPS1-related proline-alanine-rich protein kinase OS=Mus musculus OX=10090 GN=Stk39 PE=1 SV=1	Q9Z1W9	Stk39	60 kDa		< 0.00010	1_4T1_cell high, 4T1_MV low, 4T1_sEV low	5	5	7	0	0	0	0	0	0	0	0	0
1354	Alpha-(1,6)-fucosyltransferase OS=Mus musculus OX=10090 GN=Fut8 PE=1 SV=2	Q9WTS2	Fut8	67 kDa		0.0011	Statistically insignificant between tested categories	0	0	0	8	7	1	0	0	0	0	0	0
1355	E3 ubiquitin-protein ligase UHRF1 OS=Mus musculus OX=10090 GN=Uhrf1 PE=1 SV=2	Q8VDF2	Uhrf1	88 kDa	TRUE	0.44	[]	0	0	14	0	0	0	0	0	0	0	0	0
1356	SH3 domain-binding glutamic acid-rich-like protein OS=Mus musculus OX=10090 GN=Sh3bgrl PE=1 SV=1	Q9JJU8	Sh3bgrl	13 kDa		0.00018	1_4T1_cell high, 4T1_MV high, 4T1_sEV low	3	5	6	0	0	0	1	1	1	0	0	0
1357	Testis-expressed protein 10 OS=Mus musculus OX=10090 GN=Tex10 PE=1 SV=1	Q3URQ0	Tex10	105 kDa		< 0.00010	1_4T1_cell high, 4T1_MV low, 4T1_sEV low	4	6	6	0	0	0	0	0	0	1	1	0
1358	Nucleolar and coiled-body phosphoprotein 1 OS=Mus musculus OX=10090 GN=Nolc1 PE=1 SV=1	E9Q5C9	Nolc1	74 kDa		0.35	[]	1	1	14	0	0	0	1	0	0	1	1	0
1359	Argininosuccinate lyase OS=Mus musculus OX=10090 GN=Asl PE=1 SV=1	Q91YI0	Asl	52 kDa		0.0014	1_4T1_cell high, 4T1_MV low, 4T1_sEV low	5	5	5	0	0	0	2	2	0	0	0	0
1360	SUN domain-containing protein 1 OS=Mus musculus OX=10090 GN=Sun1 PE=1 SV=2	Q9D666	Sun1	102 kDa	TRUE	0.063	[]	2	3	6	2	2	0	0	0	0	0	0	0
1361	Actin-like protein 6A OS=Mus musculus OX=10090 GN=Actl6a PE=1 SV=2	Q9Z2N8	Actl6a	47 kDa	TRUE	0.00018	1_4T1_cell high, 4T1_MV low, 4T1_sEV low	5	4	7	0	0	0	0	0	0	0	0	1
1362	Ubiquitin carboxyl-terminal hydrolase isozyme L3 OS=Mus musculus OX=10090 GN=Uchl3 PE=1 SV=2	Q9JKB1	Uchl3	26 kDa		< 0.00010	1_4T1_cell high, 4T1_MV low, 4T1_sEV low	7	5	7	0	0	0	0	0	0	0	0	0
1363	DnaJ homolog subfamily C member 8 OS=Mus musculus OX=10090 GN=Dnajc8 PE=1 SV=2	Q6NZB0	Dnajc8	30 kDa		0.00033	1_4T1_cell high, 4T1_MV low, 4T1_sEV low	4	4	9	0	0	0	0	0	0	0	0	0
1364	Pentatricopeptide repeat domain-containing protein 3, mitochondrial OS=Mus musculus OX=10090 GN=Ptcd3 PE=1 SV=2	Q14C51	Ptcd3	78 kDa		< 0.00010	1_4T1_cell high, 4T1_MV low, 4T1_sEV low	5	5	6	0	0	0	0	0	0	0	0	0
1365	Importin subunit alpha-7 OS=Mus musculus OX=10090 GN=Kpna6 PE=1 SV=2	O35345	Kpna6	60 kDa	TRUE	< 0.00010	1_4T1_cell high, 4T1_MV low, 4T1_sEV low	4	4	7	0	0	0	0	0	0	0	0	0
1366	Cytoskeleton-associated protein 4 OS=Mus musculus OX=10090 GN=Ckap4 PE=1 SV=2	Q8BMK4	Ckap4	64 kDa		0.0019	1_4T1_cell high, 4T1_MV low, 4T1_sEV low	3	3	8	0	0	0	0	0	0	0	0	0
1367	Importin-11 OS=Mus musculus OX=10090 GN=Ipo11 PE=1 SV=1	Q8K2V6	Ipo11	112 kDa		< 0.00010	1_4T1_cell high, 4T1_MV low, 4T1_sEV low	3	5	5	0	0	0	0	0	0	0	0	0
1368	Ras GTPase-activating protein-binding protein 2 OS=Mus musculus OX=10090 GN=G3bp2 PE=1 SV=2	P97379	G3bp2	54 kDa	TRUE	< 0.00010	1_4T1_cell high, 4T1_MV low, 4T1_sEV low	6	6	8	0	0	0	0	0	0	0	0	0
1369	CLIP-associating protein 1 OS=Mus musculus OX=10090 GN=Clasp1 PE=1 SV=2	Q80TV8	Clasp1	169 kDa	TRUE	< 0.00010	1_4T1_cell high, 4T1_MV low, 4T1_sEV low	6	4	7	0	0	0	0	0	0	0	0	0
1370	Selenide, water dikinase 1 OS=Mus musculus OX=10090 GN=Sephs1 PE=1 SV=1	Q8BH69	Sephs1	43 kDa		0.00068	1_4T1_cell high, 4T1_MV low, 4T1_sEV low	4	6	3	0	0	0	0	0	0	0	0	0
1371	Sideroflexin-3 OS=Mus musculus OX=10090 GN=Sfxn3 PE=1 SV=1	Q91V61	Sfxn3	35 kDa	TRUE	< 0.00010	1_4T1_cell high, 4T1_MV low, 4T1_sEV low	7	7	5	0	0	0	0	0	0	0	0	0
1372	Kelch domain-containing protein 4 OS=Mus musculus OX=10090 GN=Klhdc4 PE=2 SV=2	Q921I2	Klhdc4	65 kDa		< 0.00010	1_4T1_cell high, 4T1_MV low, 4T1_sEV low	5	5	5	0	0	0	0	0	0	0	0	0
1373	Pyridoxal-dependent decarboxylase domain-containing protein 1 OS=Mus musculus OX=10090 GN=Pdxdc1 PE=1 SV=2	Q99K01	Pdxdc1	87 kDa		< 0.00010	1_4T1_cell high, 4T1_MV low, 4T1_sEV low	5	6	6	0	0	0	0	0	0	0	0	0
1374	Protein CIP2A OS=Mus musculus OX=10090 GN=Cip2a PE=1 SV=3	Q8BWY9	Cip2a	102 kDa		0.0038	1_4T1_cell high, 4T1_MV low, 4T1_sEV low	2	4	8	0	0	0	0	0	0	0	0	0
1375	Insulin receptor OS=Mus musculus OX=10090 GN=Insr PE=1 SV=2	P15208	Insr	156 kDa	TRUE	0.089	[]	0	0	0	5	6	0	0	2	0	1	0	2
1376	Mitogen-activated protein kinase kinase kinase 20 OS=Mus musculus OX=10090 GN=Map3k20 PE=1 SV=1	Q9ESL4	Map3k20	92 kDa		0.0011	1_4T1_cell high, 4T1_MV low, 4T1_sEV low	4	4	6	0	0	0	0	1	0	0	0	1
1377	Cytoplasmic aconitate hydratase OS=Mus musculus OX=10090 GN=Aco1 PE=1 SV=3	ACOHC_MOUSE	Aco1	?		0.079	[]	6	6	0	0	0	0	1	1	0	0	0	0
1378	Peroxisomal multifunctional enzyme type 2 OS=Mus musculus OX=10090 GN=Hsd17b4 PE=1 SV=3	P51660	Hsd17b4	79 kDa		0.23	[]	6	5	4	0	0	1	0	0	0	0	0	0
1379	Serine/threonine-protein phosphatase 2A 56 kDa regulatory subunit gamma isoform OS=Mus musculus OX=10090 GN=Ppp2r5c PE=1 SV=2	Q60996	Ppp2r5c	61 kDa	TRUE	< 0.00010	1_4T1_cell high, 4T1_MV low, 4T1_sEV low	4	6	6	0	0	0	1	0	0	0	0	0
1380	V-set and immunoglobulin domain-containing protein 10 OS=Mus musculus OX=10090 GN=Vsig10 PE=3 SV=2	D3YX43	Vsig10	61 kDa		0.00017	1_4T1_cell high, 4T1_MV low, 4T1_sEV low	1	0	0	6	7	1	0	0	0	0	0	0
1381	Beta-adrenergic receptor kinase 1 OS=Mus musculus OX=10090 GN=Grk2 PE=1 SV=2	Q99MK8	Grk2	80 kDa		0.00051	1_4T1_cell high, 4T1_MV low, 4T1_sEV low	3	3	7	0	0	0	0	0	0	0	0	0
1382	Acylamino-acid-releasing enzyme OS=Mus musculus OX=10090 GN=Apeh PE=1 SV=3	ACPH_MOUSE	Apeh	?	TRUE	0.15	[]	8	7	0	0	0	0	0	3	0	0	0	0
1383	Probable ATP-dependent RNA helicase DDX46 OS=Mus musculus OX=10090 GN=Ddx46 PE=1 SV=2	Q569Z5	Ddx46	117 kDa		0.0037	1_4T1_cell high, 4T1_MV low, 4T1_sEV low	2	6	9	0	0	0	0	0	0	0	0	0
1384	Isocitrate dehydrogenase [NAD] subunit gamma 1, mitochondrial OS=Mus musculus OX=10090 GN=Idh3g PE=1 SV=1	P70404	Idh3g	43 kDa		0.00023	1_4T1_cell high, 4T1_MV low, 4T1_sEV low	5	7	4	0	0	0	0	0	0	0	0	0
1385	Dynamin-like 120 kDa protein, mitochondrial OS=Mus musculus OX=10090 GN=Opa1 PE=1 SV=1	P58281	Opa1	111 kDa		< 0.00010	1_4T1_cell high, 4T1_MV low, 4T1_sEV low	5	4	7	0	0	0	0	0	0	0	0	0
1386	28 kDa heat- and acid-stable phosphoprotein OS=Mus musculus OX=10090 GN=Pdap1 PE=1 SV=1	Q3UHX2	Pdap1	21 kDa		0.00022	1_4T1_cell high, 4T1_MV low, 4T1_sEV low	3	5	8	0	0	0	0	0	0	0	0	0
1387	DnaJ homolog subfamily C member 10 OS=Mus musculus OX=10090 GN=Dnajc10 PE=1 SV=2	Q9DC23	Dnajc10	91 kDa		< 0.00010	1_4T1_cell high, 4T1_MV low, 4T1_sEV low	4	5	5	0	0	0	0	0	0	0	0	0
1388	Small glutamine-rich tetratricopeptide repeat-containing protein alpha OS=Mus musculus OX=10090 GN=Sgta PE=1 SV=2	Q8BJU0	Sgta	34 kDa		< 0.00010	1_4T1_cell high, 4T1_MV low, 4T1_sEV low	4	5	8	0	0	0	0	0	0	0	0	0
1389	ATP-dependent RNA helicase DDX18 OS=Mus musculus OX=10090 GN=Ddx18 PE=1 SV=1	Q8K363	Ddx18	74 kDa		0.096	[]	1	3	12	0	0	0	0	0	0	0	0	0
1390	GTP-binding protein 1 OS=Mus musculus OX=10090 GN=Gtpbp1 PE=1 SV=2	O08582	Gtpbp1	72 kDa		0.00059	1_4T1_cell high, 4T1_MV low, 4T1_sEV low	5	6	3	0	0	0	0	0	0	0	0	0
1391	RNA-binding protein FUS OS=Mus musculus OX=10090 GN=Fus PE=1 SV=1	P56959	Fus	53 kDa		0.0007	1_4T1_cell high, 4T1_MV low, 4T1_sEV low	3	5	9	0	0	0	0	0	0	0	0	0
1392	Nuclear pore complex protein Nup88 OS=Mus musculus OX=10090 GN=Nup88 PE=1 SV=1	Q8CEC0	Nup88	85 kDa		< 0.00010	1_4T1_cell high, 4T1_MV low, 4T1_sEV low	4	4	6	0	0	0	0	0	0	0	0	0
1393	Protein MEMO1 OS=Mus musculus OX=10090 GN=Memo1 PE=1 SV=1	Q91VH6	Memo1	34 kDa		< 0.00010	1_4T1_cell high, 4T1_MV low, 4T1_sEV low	5	4	8	0	0	0	0	0	0	0	0	0
1394	Nuclear RNA export factor 1 OS=Mus musculus OX=10090 GN=Nxf1 PE=1 SV=3	Q99JX7	Nxf1	70 kDa		< 0.00010	1_4T1_cell high, 4T1_MV low, 4T1_sEV low	4	6	5	0	0	0	0	0	0	0	0	0
1395	Putative RNA-binding protein Luc7-like 1 OS=Mus musculus OX=10090 GN=Luc7l PE=1 SV=2	Q9CYI4	Luc7l	44 kDa	TRUE	< 0.00010	1_4T1_cell high, 4T1_MV low, 4T1_sEV low	4	5	7	0	0	0	0	0	0	0	0	0
1396	28S ribosomal protein S29, mitochondrial OS=Mus musculus OX=10090 GN=Dap3 PE=1 SV=1	Q9ER88	Dap3	45 kDa		0.00011	1_4T1_cell high, 4T1_MV low, 4T1_sEV low	3	6	5	0	0	0	0	0	0	0	0	0
1397	Eukaryotic translation initiation factor 4B OS=Mus musculus OX=10090 GN=Eif4b PE=1 SV=1	Q8BGD9	Eif4b	69 kDa		0.048	1_4T1_cell high, 4T1_MV low, 4T1_sEV low	3	2	12	0	0	0	0	0	0	0	0	0
1398	Probable ATP-dependent RNA helicase DDX47 OS=Mus musculus OX=10090 GN=Ddx47 PE=2 SV=2	Q9CWX9	Ddx47	51 kDa		0.014	1_4T1_cell high, 4T1_MV low, 4T1_sEV low	1	6	8	0	0	0	0	0	0	0	0	0
1399	Metastasis-associated protein MTA1 OS=Mus musculus OX=10090 GN=Mta1 PE=1 SV=1	Q8K4B0	Mta1	81 kDa	TRUE	0.0041	1_4T1_cell high, 4T1_MV low, 4T1_sEV low	4	2	8	0	0	0	0	0	0	0	0	0
1400	Small subunit processome component 20 homolog OS=Mus musculus OX=10090 GN=Utp20 PE=1 SV=2	Q5XG71	Utp20	318 kDa		0.44	[]	0	0	9	0	0	0	0	0	0	0	0	0
1401	Cytospin-B OS=Mus musculus OX=10090 GN=Specc1 PE=1 SV=2	Q5SXY1	Specc1	118 kDa		0.019	1_4T1_cell high, 4T1_MV high, 4T1_sEV low	2	3	6	0	0	0	1	0	1	0	0	0
1402	3'(2'),5'-bisphosphate nucleotidase 1 OS=Mus musculus OX=10090 GN=Bpnt1 PE=1 SV=2	Q9Z0S1	Bpnt1	33 kDa		0.15	[]	3	2	6	2	1	0	0	1	0	0	0	0
1403	Striatin-3 OS=Mus musculus OX=10090 GN=Strn3 PE=1 SV=1	Q9ERG2	Strn3	87 kDa		0.036	1_4T1_cell high, 4T1_MV low, 4T1_sEV low	4	6	3	1	0	0	1	1	0	0	0	0
1404	Translin OS=Mus musculus OX=10090 GN=Tsn PE=1 SV=1	Q62348	Tsn	26 kDa		0.0044	1_4T1_cell high, 4T1_MV low, 4T1_sEV low	4	6	4	1	1	0	0	0	0	0	0	0
1405	Cysteine and histidine-rich domain-containing protein 1 OS=Mus musculus OX=10090 GN=Chordc1 PE=1 SV=1	Q9D1P4	Chordc1	37 kDa		< 0.00010	1_4T1_cell high, 4T1_MV low, 4T1_sEV low	5	4	6	0	0	0	1	1	0	0	0	0
1406	Procollagen C-endopeptidase enhancer 2 OS=Mus musculus OX=10090 GN=Pcolce2 PE=2 SV=2	Q8R4W6	Pcolce2	45 kDa		0.028	1_4T1_cell low, 4T1_MV low, 4T1_sEV high	0	0	0	0	0	0	0	0	1	4	2	7
1407	Actin-histidine N-methyltransferase OS=Mus musculus OX=10090 GN=Setd3 PE=1 SV=1	Q91WC0	Setd3	67 kDa		< 0.00010	1_4T1_cell high, 4T1_MV low, 4T1_sEV low	5	5	7	0	0	0	0	0	0	0	0	0
1408	PC4 and SFRS1-interacting protein OS=Mus musculus OX=10090 GN=Psip1 PE=1 SV=1	Q99JF8	Psip1	60 kDa	TRUE	0.57	[]	0	0	10	0	0	0	0	0	0	0	0	2
1409	AP-3 complex subunit beta-1 OS=Mus musculus OX=10090 GN=Ap3b1 PE=1 SV=2	Q9Z1T1	Ap3b1	123 kDa	TRUE	< 0.00010	1_4T1_cell high, 4T1_MV low, 4T1_sEV low	4	4	7	0	0	0	0	0	0	0	0	0
1410	GTPase-activating protein and VPS9 domain-containing protein 1 OS=Mus musculus OX=10090 GN=Gapvd1 PE=1 SV=2	Q6PAR5	Gapvd1	162 kDa		< 0.00010	1_4T1_cell high, 4T1_MV low, 4T1_sEV low	4	4	6	0	0	0	0	0	0	0	0	0
1411	Exosome complex exonuclease RRP44 OS=Mus musculus OX=10090 GN=Dis3 PE=1 SV=4	Q9CSH3	Dis3	109 kDa		0.02	1_4T1_cell high, 4T1_MV low, 4T1_sEV low	2	4	11	0	0	0	0	0	0	0	0	0
1412	Transcription activator BRG1 OS=Mus musculus OX=10090 GN=Smarca4 PE=1 SV=1	Q3TKT4	Smarca4	181 kDa		0.016	1_4T1_cell high, 4T1_MV low, 4T1_sEV low	2	3	9	0	0	0	0	0	0	0	0	0
1413	Lymphocyte-specific helicase OS=Mus musculus OX=10090 GN=Hells PE=1 SV=2	Q60848	Hells	95 kDa		< 0.00010	1_4T1_cell high, 4T1_MV low, 4T1_sEV low	4	6	7	0	0	0	0	0	0	0	0	0
1414	Epithelial splicing regulatory protein 1 OS=Mus musculus OX=10090 GN=Esrp1 PE=1 SV=2	Q3US41	Esrp1	76 kDa		0.013	1_4T1_cell high, 4T1_MV low, 4T1_sEV low	4	5	1	0	0	0	0	0	0	0	0	0
1415	Eukaryotic translation initiation factor 3 subunit J-A OS=Mus musculus OX=10090 GN=Eif3j1 PE=2 SV=1	Q3UGC7 (+1)	Eif3j1	29 kDa		0.0025	1_4T1_cell high, 4T1_MV low, 4T1_sEV low	2	5	8	0	0	0	0	0	0	0	0	0
1416	C-terminal-binding protein 1 OS=Mus musculus OX=10090 GN=Ctbp1 PE=1 SV=2	O88712	Ctbp1	48 kDa	TRUE	< 0.00010	1_4T1_cell high, 4T1_MV low, 4T1_sEV low	5	6	6	0	0	0	0	0	0	0	0	0
1417	Guanine nucleotide-binding protein-like 1 OS=Mus musculus OX=10090 GN=Gnl1 PE=1 SV=4	P36916	Gnl1	69 kDa		< 0.00010	1_4T1_cell high, 4T1_MV low, 4T1_sEV low	3	5	5	0	0	0	0	0	0	0	0	0
1418	Quinone oxidoreductase OS=Mus musculus OX=10090 GN=Cryz PE=1 SV=1	P47199	Cryz	35 kDa		< 0.00010	1_4T1_cell high, 4T1_MV low, 4T1_sEV low	6	6	5	0	0	0	0	0	0	0	0	0
1419	Lysine-specific histone demethylase 1A OS=Mus musculus OX=10090 GN=Kdm1a PE=1 SV=2	Q6ZQ88	Kdm1a	93 kDa		0.00012	1_4T1_cell high, 4T1_MV low, 4T1_sEV low	5	3	7	0	0	0	0	0	0	0	0	0
1420	Dynactin subunit 4 OS=Mus musculus OX=10090 GN=Dctn4 PE=1 SV=1	Q8CBY8	Dctn4	53 kDa		< 0.00010	1_4T1_cell high, 4T1_MV low, 4T1_sEV low	6	5	6	0	0	0	0	0	0	0	0	0
1421	Paraspeckle component 1 OS=Mus musculus OX=10090 GN=Pspc1 PE=1 SV=1	Q8R326	Pspc1	59 kDa		< 0.00010	1_4T1_cell high, 4T1_MV low, 4T1_sEV low	6	5	5	0	0	0	0	0	0	0	0	0
1422	Elongation factor Ts, mitochondrial OS=Mus musculus OX=10090 GN=Tsfm PE=1 SV=1	Q9CZR8	Tsfm	35 kDa		0.0027	1_4T1_cell high, 4T1_MV low, 4T1_sEV low	7	8	3	0	0	0	0	0	0	0	0	0
1423	Pescadillo homolog OS=Mus musculus OX=10090 GN=Pes1 PE=1 SV=1	Q9EQ61	Pes1	68 kDa		0.0072	1_4T1_cell high, 4T1_MV low, 4T1_sEV low	3	4	11	0	0	0	0	0	0	0	0	0
1424	Replication factor C subunit 2 OS=Mus musculus OX=10090 GN=Rfc2 PE=1 SV=1	Q9WUK4	Rfc2	39 kDa		< 0.00010	1_4T1_cell high, 4T1_MV low, 4T1_sEV low	4	6	8	0	0	0	0	0	0	0	0	0
1425	Chromobox protein homolog 3 OS=Mus musculus OX=10090 GN=Cbx3 PE=1 SV=2	P23198	Cbx3	21 kDa	TRUE	0.0072	1_4T1_cell high, 4T1_MV low, 4T1_sEV low	3	4	11	0	0	0	0	0	0	0	0	0
1426	Toll-like receptor 3 OS=Mus musculus OX=10090 GN=Tlr3 PE=1 SV=2	Q99MB1	Tlr3	104 kDa		0.056	[]	0	0	0	4	6	0	0	0	0	0	0	0
1427	VPS10 domain-containing receptor SorCS2 OS=Mus musculus OX=10090 GN=Sorcs2 PE=1 SV=2	Q9EPR5	Sorcs2	129 kDa		0.055	[]	0	0	0	6	6	0	0	0	0	0	0	0
1428	Citron Rho-interacting kinase OS=Mus musculus OX=10090 GN=Cit PE=1 SV=3	P49025	Cit	235 kDa		0.16	[]	0	0	0	0	0	0	4	12	0	0	0	0
1429	Alkaline phosphatase, tissue-nonspecific isozyme OS=Mus musculus OX=10090 GN=Alpl PE=1 SV=2	P09242	Alpl	58 kDa		0.23	[]	0	0	0	1	2	0	0	4	0	2	2	6
1430	Protein kinase C delta type OS=Mus musculus OX=10090 GN=Prkcd PE=1 SV=3	P28867	Prkcd	78 kDa		0.3	[]	2	5	1	0	0	0	0	2	0	1	1	0
1431	PDZ and LIM domain protein 7 OS=Mus musculus OX=10090 GN=Pdlim7 PE=1 SV=1	Q3TJD7	Pdlim7	50 kDa		0.082	[]	2	1	7	0	0	0	1	1	0	0	0	0
1432	Rho guanine nucleotide exchange factor 7 OS=Mus musculus OX=10090 GN=Arhgef7 PE=1 SV=2	Q9ES28	Arhgef7	97 kDa		0.005	1_4T1_cell high, 4T1_MV high, 4T1_sEV low	3	4	5	0	0	0	2	2	0	0	0	0
1433	Tumor protein D54 OS=Mus musculus OX=10090 GN=Tpd52l2 PE=1 SV=1	Q9CYZ2	Tpd52l2	24 kDa		0.026	1_4T1_cell high, 4T1_MV low, 4T1_sEV low	4	4	5	0	1	0	0	0	1	0	0	0
1434	60S ribosomal protein L34 OS=Mus musculus OX=10090 GN=Rpl34 PE=1 SV=2	Q9D1R9	Rpl34	13 kDa		0.14	[]	2	2	7	0	0	0	0	0	0	0	0	2
1435	Latent-transforming growth factor beta-binding protein 1 OS=Mus musculus OX=10090 GN=Ltbp1 PE=1 SV=2	Q8CG19	Ltbp1	187 kDa		0.47	[]	0	0	0	0	0	0	8	0	0	1	2	1
1436	Protein FAM234B OS=Mus musculus OX=10090 GN=Fam234b PE=1 SV=1	Q8BYI8	Fam234b	67 kDa		0.069	[]	0	0	0	6	5	0	0	1	0	0	0	0
1437	Sorting nexin-6 OS=Mus musculus OX=10090 GN=Snx6 PE=1 SV=2	Q6P8X1	Snx6	47 kDa		0.00025	1_4T1_cell high, 4T1_MV low, 4T1_sEV low	3	3	5	0	0	0	1	0	0	0	0	0
1438	Histone deacetylase 1 OS=Mus musculus OX=10090 GN=Hdac1 PE=1 SV=1	O09106	Hdac1	55 kDa	TRUE	0.0002	1_4T1_cell high, 4T1_MV low, 4T1_sEV low	4	4	6	0	0	0	0	0	0	0	0	1
1439	Protein regulator of cytokinesis 1 OS=Mus musculus OX=10090 GN=Prc1 PE=1 SV=2	Q99K43	Prc1	70 kDa		0.11	[]	0	0	1	0	0	0	3	6	0	0	0	0
1440	Ribosomal biogenesis protein LAS1L OS=Mus musculus OX=10090 GN=Las1l PE=1 SV=1	A2BE28	Las1l	89 kDa		0.01	1_4T1_cell high, 4T1_MV low, 4T1_sEV low	2	3	7	0	0	0	0	0	0	0	1	0
1441	Testin OS=Mus musculus OX=10090 GN=Tes PE=1 SV=1	P47226	Tes	48 kDa		0.016	1_4T1_cell high, 4T1_MV low, 4T1_sEV low	2	3	9	0	0	0	0	0	0	0	0	0
1442	Multifunctional procollagen lysine hydroxylase and glycosyltransferase LH3 OS=Mus musculus OX=10090 GN=Plod3 PE=1 SV=1	Q9R0E1	Plod3	85 kDa		< 0.00010	1_4T1_cell high, 4T1_MV low, 4T1_sEV low	4	4	6	0	0	0	0	0	0	0	0	0
1443	Ubiquitin-protein ligase E3A OS=Mus musculus OX=10090 GN=Ube3a PE=1 SV=2	O08759	Ube3a	100 kDa		0.0049	1_4T1_cell high, 4T1_MV low, 4T1_sEV low	3	3	9	0	0	0	0	0	0	0	0	0
1444	Serine/threonine-protein phosphatase 4 catalytic subunit OS=Mus musculus OX=10090 GN=Ppp4c PE=1 SV=2	P97470	Ppp4c	35 kDa	TRUE	0.0021	1_4T1_cell high, 4T1_MV low, 4T1_sEV low	3	3	7	0	0	0	1	0	0	0	0	0
1445	DNA polymerase alpha subunit B OS=Mus musculus OX=10090 GN=Pola2 PE=1 SV=2	P33611	Pola2	66 kDa		0.00068	1_4T1_cell high, 4T1_MV low, 4T1_sEV low	4	6	3	0	0	0	0	0	0	0	0	0
1446	Cytosolic non-specific dipeptidase OS=Mus musculus OX=10090 GN=Cndp2 PE=1 SV=1	Q9D1A2	Cndp2	53 kDa		< 0.00010	1_4T1_cell high, 4T1_MV low, 4T1_sEV low	5	5	6	0	0	0	0	0	0	0	0	0
1447	Spartin OS=Mus musculus OX=10090 GN=Spart PE=1 SV=1	Q8R1X6	Spart	73 kDa		0.0017	1_4T1_cell high, 4T1_MV low, 4T1_sEV low	5	2	4	0	0	0	0	0	0	0	0	0
1448	Protein VAC14 homolog OS=Mus musculus OX=10090 GN=Vac14 PE=1 SV=1	Q80WQ2	Vac14	88 kDa		< 0.00010	1_4T1_cell high, 4T1_MV low, 4T1_sEV low	5	5	4	0	0	0	0	0	0	0	0	0
1449	Double-strand break repair protein MRE11 OS=Mus musculus OX=10090 GN=Mre11 PE=1 SV=1	Q61216	Mre11	80 kDa		< 0.00010	1_4T1_cell high, 4T1_MV low, 4T1_sEV low	5	5	5	0	0	0	0	0	0	0	0	0
1450	Zinc finger protein ZPR1 OS=Mus musculus OX=10090 GN=Zpr1 PE=1 SV=1	Q62384	Zpr1	51 kDa		< 0.00010	1_4T1_cell high, 4T1_MV low, 4T1_sEV low	5	4	6	0	0	0	0	0	0	0	0	0
1451	CCA tRNA nucleotidyltransferase 1, mitochondrial OS=Mus musculus OX=10090 GN=Trnt1 PE=1 SV=1	Q8K1J6	Trnt1	50 kDa		< 0.00010	1_4T1_cell high, 4T1_MV low, 4T1_sEV low	5	4	5	0	0	0	0	0	0	0	0	0
1452	Exosome complex component RRP43 OS=Mus musculus OX=10090 GN=Exosc8 PE=1 SV=1	Q9D753	Exosc8	30 kDa		0.0019	1_4T1_cell high, 4T1_MV low, 4T1_sEV low	7	6	3	0	0	0	0	0	0	0	0	0
1453	RNA 3'-terminal phosphate cyclase OS=Mus musculus OX=10090 GN=RtcA PE=1 SV=2	Q9D7H3	RtcA	39 kDa		0.00094	1_4T1_cell high, 4T1_MV low, 4T1_sEV low	6	6	3	0	0	0	0	0	0	0	0	0
1454	Cleavage and polyadenylation specificity factor subunit 3 OS=Mus musculus OX=10090 GN=Cpsf3 PE=1 SV=2	Q9QXK7	Cpsf3	78 kDa		0.00013	1_4T1_cell high, 4T1_MV low, 4T1_sEV low	4	3	7	0	0	0	0	0	0	0	0	0
1455	Fragile X mental retardation syndrome-related protein 2 OS=Mus musculus OX=10090 GN=Fxr2 PE=1 SV=1	Q9WVR4	Fxr2	74 kDa	TRUE	< 0.00010	1_4T1_cell high, 4T1_MV low, 4T1_sEV low	4	4	6	0	0	0	0	0	0	0	0	0
1456	Beta-mannosidase OS=Mus musculus OX=10090 GN=Manba PE=1 SV=1	Q8K2I4	Manba	101 kDa		0.065	[]	0	0	0	4	7	0	0	0	0	0	0	0
1457	Superkiller complex protein 8 OS=Mus musculus OX=10090 GN=Skic8 PE=1 SV=1	SKI8_MOUSE	Skic8	?		0.052	[]	7	8	0	0	0	0	0	0	0	0	0	0
1458	Apoptotic chromatin condensation inducer in the nucleus OS=Mus musculus OX=10090 GN=Acin1 PE=1 SV=3	Q9JIX8	Acin1	151 kDa		0.86	[]	0	0	7	0	0	1	0	0	3	0	0	1
1459	Endophilin-B1 OS=Mus musculus OX=10090 GN=Sh3glb1 PE=1 SV=1	Q9JK48	Sh3glb1	41 kDa	TRUE	0.0029	1_4T1_cell high, 4T1_MV low, 4T1_sEV low	5	4	4	0	0	0	1	2	0	0	0	0
1460	WD repeat-containing protein 18 OS=Mus musculus OX=10090 GN=Wdr18 PE=1 SV=1	Q4VBE8	Wdr18	47 kDa		0.012	1_4T1_cell high, 4T1_MV low, 4T1_sEV low	2	3	7	0	0	0	0	0	0	1	1	0
1461	Neurogenic locus notch homolog protein 2 OS=Mus musculus OX=10090 GN=Notch2 PE=1 SV=2	O35516	Notch2	266 kDa		0.0073	1_4T1_cell low, 4T1_MV low, 4T1_sEV high	0	0	0	0	0	0	1	0	0	4	5	1
1462	Ribosome maturation protein SBDS OS=Mus musculus OX=10090 GN=Sbds PE=1 SV=4	P70122	Sbds	29 kDa		0.00018	1_4T1_cell high, 4T1_MV low, 4T1_sEV low	4	3	5	0	0	0	0	1	0	0	0	0
1463	Alpha-adducin OS=Mus musculus OX=10090 GN=Add1 PE=1 SV=2	Q9QYC0	Add1	81 kDa		0.00028	1_4T1_cell high, 4T1_MV low, 4T1_sEV low	5	5	3	0	0	0	0	0	0	0	0	0
1464	Mannosyl-oligosaccharide glucosidase OS=Mus musculus OX=10090 GN=Mogs PE=1 SV=1	Q80UM7	Mogs	92 kDa		0.0027	1_4T1_cell high, 4T1_MV low, 4T1_sEV low	5	4	4	0	1	0	0	0	0	0	0	0
1465	5'-nucleotidase domain-containing protein 3 OS=Mus musculus OX=10090 GN=Nt5dc3 PE=1 SV=1	Q3UHB1	Nt5dc3	63 kDa		0.00054	1_4T1_cell high, 4T1_MV low, 4T1_sEV low	0	0	1	6	4	1	0	0	0	0	0	0
1466	Aspartyl/asparaginyl beta-hydroxylase OS=Mus musculus OX=10090 GN=Asph PE=1 SV=1	Q8BSY0	Asph	83 kDa		0.0081	1_4T1_cell high, 4T1_MV low, 4T1_sEV low	3	6	2	0	0	0	0	0	0	0	0	0
1467	YTH domain-containing family protein 2 OS=Mus musculus OX=10090 GN=Ythdf2 PE=1 SV=1	Q91YT7	Ythdf2	62 kDa	TRUE	0.0049	1_4T1_cell high, 4T1_MV low, 4T1_sEV low	2	2	6	0	0	0	0	0	0	0	0	0
1468	N-alpha-acetyltransferase 50 OS=Mus musculus OX=10090 GN=Naa50 PE=1 SV=1	Q6PGB6	Naa50	19 kDa		< 0.00010	1_4T1_cell high, 4T1_MV low, 4T1_sEV low	5	5	5	0	0	0	0	0	0	0	0	0
1469	Nucleobindin-1 OS=Mus musculus OX=10090 GN=Nucb1 PE=1 SV=2	Q02819	Nucb1	53 kDa		0.0015	1_4T1_cell high, 4T1_MV low, 4T1_sEV low	6	7	3	0	0	0	0	0	0	0	0	0
1470	CCR4-NOT transcription complex subunit 9 OS=Mus musculus OX=10090 GN=Cnot9 PE=1 SV=1	Q9JKY0	Cnot9	34 kDa		< 0.00010	1_4T1_cell high, 4T1_MV low, 4T1_sEV low	5	4	5	0	0	0	0	0	0	0	0	0
1471	Heme oxygenase 2 OS=Mus musculus OX=10090 GN=Hmox2 PE=1 SV=1	O70252	Hmox2	36 kDa		< 0.00010	1_4T1_cell high, 4T1_MV low, 4T1_sEV low	4	4	7	0	0	0	0	0	0	0	0	0
1472	FH1/FH2 domain-containing protein 1 OS=Mus musculus OX=10090 GN=Fhod1 PE=1 SV=3	Q6P9Q4	Fhod1	130 kDa		< 0.00010	1_4T1_cell high, 4T1_MV low, 4T1_sEV low	4	5	5	0	0	0	0	0	0	0	0	0
1473	Serine/threonine-protein kinase N1 OS=Mus musculus OX=10090 GN=Pkn1 PE=1 SV=3	P70268	Pkn1	104 kDa	TRUE	0.00014	1_4T1_cell high, 4T1_MV low, 4T1_sEV low	2	4	5	0	0	0	0	0	0	0	0	0
1474	Luc7-like protein 3 OS=Mus musculus OX=10090 GN=Luc7l3 PE=1 SV=1	Q5SUF2	Luc7l3	51 kDa		0.00051	1_4T1_cell high, 4T1_MV low, 4T1_sEV low	3	3	7	0	0	0	0	0	0	0	0	0
1475	Zinc finger CCCH domain-containing protein 15 OS=Mus musculus OX=10090 GN=Zc3h15 PE=1 SV=2	Q3TIV5	Zc3h15	48 kDa		0.00086	1_4T1_cell high, 4T1_MV low, 4T1_sEV low	6	5	3	0	0	0	0	0	0	0	0	0
1476	RNA-binding protein EWS OS=Mus musculus OX=10090 GN=Ewsr1 PE=1 SV=2	Q61545	Ewsr1	68 kDa		< 0.00010	1_4T1_cell high, 4T1_MV low, 4T1_sEV low	5	6	4	0	0	0	0	0	0	0	0	0
1477	Serine/threonine-protein phosphatase 4 regulatory subunit 1 OS=Mus musculus OX=10090 GN=Ppp4r1 PE=1 SV=2	Q8K2V1	Ppp4r1	106 kDa		< 0.00010	1_4T1_cell high, 4T1_MV low, 4T1_sEV low	4	4	5	0	0	0	0	0	0	0	0	0
1478	Host cell factor 1 OS=Mus musculus OX=10090 GN=Hcfc1 PE=1 SV=2	Q61191	Hcfc1	210 kDa		< 0.00010	1_4T1_cell high, 4T1_MV low, 4T1_sEV low	3	4	6	0	0	0	0	0	0	0	0	0
1479	Rho guanine nucleotide exchange factor 40 OS=Mus musculus OX=10090 GN=Arhgef40 PE=1 SV=1	Q3UPH7	Arhgef40	165 kDa		0.0011	1_4T1_cell high, 4T1_MV low, 4T1_sEV low	2	2	5	0	0	0	0	0	0	0	0	0
1480	pre-rRNA 2'-O-ribose RNA methyltransferase FTSJ3 OS=Mus musculus OX=10090 GN=Ftsj3 PE=1 SV=1	Q9DBE9	Ftsj3	96 kDa		0.3	[]	1	0	10	0	0	0	0	0	0	0	0	0
1481	Protein diaphanous homolog 1 OS=Mus musculus OX=10090 GN=Diaph1 PE=1 SV=1	O08808	Diaph1	139 kDa		0.022	1_4T1_cell high, 4T1_MV low, 4T1_sEV low	5	7	1	0	0	0	0	0	0	0	0	0
1482	Polypeptide N-acetylgalactosaminyltransferase 1 OS=Mus musculus OX=10090 GN=Galnt1 PE=1 SV=1	O08912	Galnt1	64 kDa		0.067	[]	1	0	0	6	5	0	0	0	0	0	0	0
1483	Deoxyuridine 5'-triphosphate nucleotidohydrolase OS=Mus musculus OX=10090 GN=Dut PE=1 SV=1	Q9CQ43	Dut	17 kDa	TRUE	0.6	[]	0	0	13	0	0	1	0	0	0	0	0	0
1484	Receptor tyrosine-protein kinase erbB-2 OS=Mus musculus OX=10090 GN=Erbb2 PE=1 SV=3	P70424	Erbb2	139 kDa		0.065	[]	0	0	0	4	7	0	0	0	0	0	0	0
1485	Nestin OS=Mus musculus OX=10090 GN=Nes PE=1 SV=1	Q6P5H2	Nes	207 kDa		0.44	[]	0	0	16	0	0	0	0	0	0	0	0	0
1486	NADH dehydrogenase [ubiquinone] iron-sulfur protein 3, mitochondrial OS=Mus musculus OX=10090 GN=Ndufs3 PE=1 SV=2	Q9DCT2	Ndufs3	30 kDa		0.0049	1_4T1_cell high, 4T1_MV low, 4T1_sEV low	4	3	5	1	1	0	0	0	0	0	0	0
1487	Sorting nexin-5 OS=Mus musculus OX=10090 GN=Snx5 PE=1 SV=1	Q9D8U8	Snx5	47 kDa		0.0022	1_4T1_cell high, 4T1_MV low, 4T1_sEV low	2	3	5	0	0	0	1	1	0	0	0	0
1488	Hippocalcin-like protein 1 OS=Mus musculus OX=10090 GN=Hpcal1 PE=1 SV=2	P62748	Hpcal1	22 kDa		0.023	1_4T1_cell high, 4T1_MV low, 4T1_sEV low	5	4	2	0	0	0	1	2	0	0	0	0
1489	Nucleolar transcription factor 1 OS=Mus musculus OX=10090 GN=Ubtf PE=1 SV=1	P25976	Ubtf	90 kDa		0.053	[]	1	1	5	0	0	0	0	0	0	0	0	0
1490	Protein PBDC1 OS=Mus musculus OX=10090 GN=Pbdc1 PE=1 SV=1	Q9D0B6	Pbdc1	22 kDa		0.00041	1_4T1_cell high, 4T1_MV low, 4T1_sEV low	5	3	5	0	0	0	1	0	0	0	0	0
1491	cAMP-dependent protein kinase type I-alpha regulatory subunit OS=Mus musculus OX=10090 GN=Prkar1a PE=1 SV=3	Q9DBC7	Prkar1a	43 kDa		0.012	1_4T1_cell high, 4T1_MV low, 4T1_sEV low	5	7	2	0	0	0	1	0	0	0	0	0
1492	Cleavage and polyadenylation specificity factor subunit 7 OS=Mus musculus OX=10090 GN=Cpsf7 PE=1 SV=2	Q8BTV2	Cpsf7	52 kDa		0.001	1_4T1_cell high, 4T1_MV low, 4T1_sEV low	4	5	3	0	0	0	0	1	0	0	0	0
1493	Dipeptidyl peptidase 1 OS=Mus musculus OX=10090 GN=Ctsc PE=1 SV=1	P97821	Ctsc	52 kDa		0.12	[]	0	0	0	3	8	0	0	1	0	0	0	0
1494	UDP-glucose 4-epimerase OS=Mus musculus OX=10090 GN=Gale PE=1 SV=1	Q8R059	Gale	38 kDa		< 0.00010	1_4T1_cell high, 4T1_MV low, 4T1_sEV low	4	5	4	0	0	0	0	0	0	0	0	0
1495	Antiviral innate immune response receptor RIG-I OS=Mus musculus OX=10090 GN=Rigi PE=1 SV=2	RIGI_MOUSE	Rigi	?	TRUE	0.093	[]	4	6	0	0	0	0	0	1	0	0	0	0
1496	Ubiquitin-associated protein 2 OS=Mus musculus OX=10090 GN=Ubap2 PE=1 SV=1	Q91VX2	Ubap2	118 kDa		0.0086	1_4T1_cell high, 4T1_MV low, 4T1_sEV low	2	3	8	0	0	0	0	0	0	0	0	0
1497	Ubiquitin conjugation factor E4 B OS=Mus musculus OX=10090 GN=Ube4b PE=1 SV=3	Q9ES00	Ube4b	133 kDa		0.0036	1_4T1_cell high, 4T1_MV low, 4T1_sEV low	2	3	7	0	0	0	0	0	0	0	0	0
1498	Thyroid hormone receptor-associated protein 3 OS=Mus musculus OX=10090 GN=Thrap3 PE=1 SV=1	Q569Z6	Thrap3	108 kDa	TRUE	0.013	1_4T1_cell high, 4T1_MV low, 4T1_sEV low	2	2	7	0	0	0	0	0	0	0	0	0
1499	Clathrin interactor 1 OS=Mus musculus OX=10090 GN=Clint1 PE=1 SV=2	Q99KN9	Clint1	69 kDa		< 0.00010	1_4T1_cell high, 4T1_MV low, 4T1_sEV low	3	3	6	0	0	0	0	0	0	0	0	0
1500	Nuclear pore glycoprotein p62 OS=Mus musculus OX=10090 GN=Nup62 PE=1 SV=2	Q63850	Nup62	53 kDa		< 0.00010	1_4T1_cell high, 4T1_MV low, 4T1_sEV low	5	5	5	0	0	0	0	0	0	0	0	0
1501	Glutamate-rich WD repeat-containing protein 1 OS=Mus musculus OX=10090 GN=Grwd1 PE=1 SV=2	Q810D6	Grwd1	49 kDa		< 0.00010	1_4T1_cell high, 4T1_MV low, 4T1_sEV low	4	4	6	0	0	0	0	0	0	0	0	0
1502	ATP-dependent (S)-NAD(P)H-hydrate dehydratase OS=Mus musculus OX=10090 GN=Naxd PE=1 SV=1	Q9CZ42	Naxd	37 kDa		< 0.00010	1_4T1_cell high, 4T1_MV low, 4T1_sEV low	4	4	5	0	0	0	0	0	0	0	0	0
1503	ADP-dependent glucokinase OS=Mus musculus OX=10090 GN=Adpgk PE=1 SV=2	Q8VDL4	Adpgk	54 kDa		0.009	1_4T1_cell high, 4T1_MV low, 4T1_sEV low	7	5	2	0	0	0	0	0	0	0	0	0
1504	Cell division cycle and apoptosis regulator protein 1 OS=Mus musculus OX=10090 GN=Ccar1 PE=1 SV=1	Q8CH18	Ccar1	132 kDa		0.00014	1_4T1_cell high, 4T1_MV low, 4T1_sEV low	2	4	5	0	0	0	0	0	0	0	0	0
1505	NADH dehydrogenase [ubiquinone] 1 alpha subcomplex subunit 10, mitochondrial OS=Mus musculus OX=10090 GN=Ndufa10 PE=1 SV=1	Q99LC3	Ndufa10	41 kDa		0.0068	1_4T1_cell high, 4T1_MV low, 4T1_sEV low	6	4	2	0	0	0	0	0	0	0	0	0
1506	Carbonic anhydrase 13 OS=Mus musculus OX=10090 GN=Ca13 PE=1 SV=1	Q9D6N1	Ca13	30 kDa		0.021	1_4T1_cell high, 4T1_MV low, 4T1_sEV low	6	7	1	0	0	0	0	0	0	0	0	0
1507	AP-1 complex subunit mu-2 OS=Mus musculus OX=10090 GN=Ap1m2 PE=1 SV=3	Q9WVP1	Ap1m2	48 kDa	TRUE	0.058	[]	5	7	0	0	0	0	0	0	0	0	0	0
1508	Mannosyl-oligosaccharide 1,2-alpha-mannosidase IA OS=Mus musculus OX=10090 GN=Man1a1 PE=1 SV=1	P45700	Man1a1	73 kDa		0.055	[]	0	0	0	5	5	0	0	0	0	0	0	0
1509	Attractin OS=Mus musculus OX=10090 GN=Atrn PE=1 SV=3	Q9WU60	Atrn	158 kDa		0.052	[]	0	0	0	4	5	0	0	0	0	0	0	0
1510	High affinity cationic amino acid transporter 1 OS=Mus musculus OX=10090 GN=Slc7a1 PE=1 SV=1	Q09143	Slc7a1	67 kDa		0.57	[]	0	0	0	0	0	0	0	0	5	0	0	4
1511	Bis(5'-adenosyl)-triphosphatase enpp4 OS=Mus musculus OX=10090 GN=Enpp4 PE=1 SV=1	Q8BTJ4	Enpp4	52 kDa		0.055	[]	0	0	0	7	7	0	0	0	0	0	0	0
1512	Serotransferrin OS=Homo sapiens OX=9606 GN=TF PE=1 SV=4	cRAP108	TF	77 kDa	TRUE	0.44	[]	0	0	0	0	0	0	0	0	6	0	0	0
1513	Transmembrane 9 superfamily member 4 OS=Mus musculus OX=10090 GN=Tm9sf4 PE=1 SV=1	Q8BH24	Tm9sf4	75 kDa		0.41	[]	1	1	2	0	1	5	0	0	1	0	0	0
1514	Serine protease 23 OS=Mus musculus OX=10090 GN=Prss23 PE=2 SV=2	Q9D6X6	Prss23	43 kDa		0.00035	1_4T1_cell low, 4T1_MV low, 4T1_sEV high	0	0	0	0	0	0	1	1	0	3	6	3
1515	Eukaryotic translation initiation factor 1A OS=Mus musculus OX=10090 GN=Eif1a PE=2 SV=3	Q60872	Eif1a	17 kDa	TRUE	0.027	1_4T1_cell high, 4T1_MV low, 4T1_sEV low	2	2	6	0	0	0	0	0	0	0	0	1
1516	Neutral cholesterol ester hydrolase 1 OS=Mus musculus OX=10090 GN=Nceh1 PE=1 SV=1	Q8BLF1	Nceh1	46 kDa		0.041	1_4T1_cell high, 4T1_MV low, 4T1_sEV low	3	6	2	0	1	0	0	0	0	0	0	0
1517	Sialate O-acetylesterase OS=Mus musculus OX=10090 GN=Siae PE=1 SV=3	P70665	Siae	61 kDa		0.088	[]	2	1	0	3	6	0	0	0	0	0	0	0
1518	ATPase family AAA domain-containing protein 3 OS=Mus musculus OX=10090 GN=Atad3 PE=1 SV=1	Q925I1	Atad3	67 kDa		0.0025	1_4T1_cell high, 4T1_MV low, 4T1_sEV low	3	2	5	0	0	0	0	1	0	0	0	0
1519	Beta-hexosaminidase subunit beta OS=Mus musculus OX=10090 GN=Hexb PE=1 SV=2	P20060	Hexb	61 kDa		0.058	[]	1	1	0	4	5	0	0	0	0	0	0	0
1520	FAS-associated factor 1 OS=Mus musculus OX=10090 GN=Faf1 PE=1 SV=2	P54731	Faf1	74 kDa		0.0021	1_4T1_cell high, 4T1_MV low, 4T1_sEV low	2	5	3	0	0	0	0	0	0	0	0	0
1521	Endoplasmic reticulum aminopeptidase 1 OS=Mus musculus OX=10090 GN=Erap1 PE=1 SV=2	Q9EQH2	Erap1	107 kDa		0.00021	1_4T1_cell high, 4T1_MV low, 4T1_sEV low	3	2	5	0	0	0	0	0	0	0	0	0
1522	ATP-binding cassette sub-family A member 3 OS=Mus musculus OX=10090 GN=Abca3 PE=1 SV=3	Q8R420	Abca3	192 kDa		< 0.00010	Statistically insignificant between tested categories	0	0	0	4	6	1	0	0	0	0	0	0
1523	Zinc phosphodiesterase ELAC protein 2 OS=Mus musculus OX=10090 GN=Elac2 PE=1 SV=1	Q80Y81	Elac2	93 kDa		0.00026	1_4T1_cell high, 4T1_MV low, 4T1_sEV low	5	4	3	0	0	0	0	0	0	0	0	0
1524	Zinc finger CCCH domain-containing protein 18 OS=Mus musculus OX=10090 GN=Zc3h18 PE=1 SV=1	Q0P678	Zc3h18	106 kDa		< 0.00010	1_4T1_cell high, 4T1_MV low, 4T1_sEV low	3	4	5	0	0	0	0	0	0	0	0	0
1525	THUMP domain-containing protein 1 OS=Mus musculus OX=10090 GN=Thumpd1 PE=1 SV=1	Q99J36	Thumpd1	39 kDa		0.0038	1_4T1_cell high, 4T1_MV low, 4T1_sEV low	3	2	7	0	0	0	0	0	0	0	0	0
1526	Protein FAM114A2 OS=Mus musculus OX=10090 GN=Fam114a2 PE=1 SV=2	Q8VE88	Fam114a2	54 kDa		0.00026	1_4T1_cell high, 4T1_MV low, 4T1_sEV low	5	4	3	0	0	0	0	0	0	0	0	0
1527	Insulin-like growth factor 2 mRNA-binding protein 1 OS=Mus musculus OX=10090 GN=Igf2bp1 PE=1 SV=1	O88477	Igf2bp1	63 kDa		< 0.00010	1_4T1_cell high, 4T1_MV low, 4T1_sEV low	3	3	6	0	0	0	0	0	0	0	0	0
1528	Nuclear receptor-binding protein OS=Mus musculus OX=10090 GN=Nrbp1 PE=1 SV=1	Q99J45	Nrbp1	60 kDa		< 0.00010	1_4T1_cell high, 4T1_MV low, 4T1_sEV low	4	5	5	0	0	0	0	0	0	0	0	0
1529	Zinc finger Ran-binding domain-containing protein 2 OS=Mus musculus OX=10090 GN=Zranb2 PE=1 SV=2	Q9R020	Zranb2	37 kDa		0.00074	1_4T1_cell high, 4T1_MV low, 4T1_sEV low	4	2	6	0	0	0	0	0	0	0	0	0
1530	Centromere/kinetochore protein zw10 homolog OS=Mus musculus OX=10090 GN=Zw10 PE=1 SV=3	O54692	Zw10	88 kDa		0.00014	1_4T1_cell high, 4T1_MV low, 4T1_sEV low	2	4	5	0	0	0	0	0	0	0	0	0
1531	Ran-binding protein 3 OS=Mus musculus OX=10090 GN=Ranbp3 PE=1 SV=2	Q9CT10	Ranbp3	53 kDa		0.0038	1_4T1_cell high, 4T1_MV low, 4T1_sEV low	2	4	8	0	0	0	0	0	0	0	0	0
1532	Elongator complex protein 1 OS=Mus musculus OX=10090 GN=Elp1 PE=1 SV=2	Q7TT37	Elp1	150 kDa		0.44	[]	0	0	8	0	0	0	0	0	0	0	0	0
1533	Gem-associated protein 5 OS=Mus musculus OX=10090 GN=Gemin5 PE=1 SV=2	Q8BX17	Gemin5	167 kDa		0.24	[]	0	1	6	0	0	0	0	0	0	0	0	0
1534	Tyrosine-protein kinase BAZ1B OS=Mus musculus OX=10090 GN=Baz1b PE=1 SV=2	Q9Z277	Baz1b	171 kDa		0.44	[]	0	0	12	0	0	0	0	0	0	0	0	0
1535	Amyloid beta A4 precursor protein-binding family B member 1-interacting protein OS=Mus musculus OX=10090 GN=Apbb1ip PE=1 SV=2	Q8R5A3	Apbb1ip	74 kDa		0.15	[]	1	1	6	0	0	0	2	2	0	0	0	0
1536	Transcription elongation factor SPT6 OS=Mus musculus OX=10090 GN=Supt6h PE=1 SV=2	Q62383	Supt6h	199 kDa		0.65	[]	2	1	5	0	0	0	0	0	2	0	0	2
1537	Glutathione S-transferase Mu 2 OS=Mus musculus OX=10090 GN=Gstm2 PE=1 SV=2	P15626	Gstm2	26 kDa		0.1	[]	4	5	1	0	1	0	0	1	0	0	0	0
1538	ATPase family AAA domain-containing protein 1 OS=Mus musculus OX=10090 GN=Atad1 PE=1 SV=1	Q9D5T0	Atad1	41 kDa		0.12	[]	2	1	6	0	1	0	0	0	0	0	0	0
1539	Pyruvate dehydrogenase E1 component subunit alpha, somatic form, mitochondrial OS=Mus musculus OX=10090 GN=Pdha1 PE=1 SV=1	P35486	Pdha1	43 kDa		0.028	1_4T1_cell high, 4T1_MV low, 4T1_sEV low	2	1	6	0	0	0	0	0	0	0	0	0
1540	Nischarin OS=Mus musculus OX=10090 GN=Nisch PE=1 SV=2	Q80TM9	Nisch	175 kDa		< 0.00010	1_4T1_cell high, 4T1_MV low, 4T1_sEV low	4	3	5	0	0	0	0	0	0	0	0	0
1541	Netrin receptor UNC5B OS=Mus musculus OX=10090 GN=Unc5b PE=1 SV=1	Q8K1S3	Unc5b	104 kDa		0.0002	1_4T1_cell low, 4T1_MV low, 4T1_sEV high	0	0	0	0	0	0	0	0	0	5	4	2
1542	Pumilio homolog 3 OS=Mus musculus OX=10090 GN=Pum3 PE=1 SV=2	Q8BKS9	Pum3	73 kDa		0.11	[]	1	2	10	0	0	0	0	0	0	0	0	0
1543	Golgi reassembly-stacking protein 2 OS=Mus musculus OX=10090 GN=Gorasp2 PE=1 SV=3	Q99JX3	Gorasp2	47 kDa		< 0.00010	1_4T1_cell high, 4T1_MV low, 4T1_sEV low	3	4	5	0	0	0	0	0	0	0	0	0
1544	OTU domain-containing protein 4 OS=Mus musculus OX=10090 GN=Otud4 PE=1 SV=1	B2RRE7	Otud4	123 kDa		< 0.00010	1_4T1_cell high, 4T1_MV low, 4T1_sEV low	3	5	5	0	0	0	0	0	0	0	0	0
1545	Dual specificity mitogen-activated protein kinase kinase 4 OS=Mus musculus OX=10090 GN=Map2k4 PE=1 SV=2	P47809	Map2k4	44 kDa		< 0.00010	1_4T1_cell high, 4T1_MV low, 4T1_sEV low	5	4	4	0	0	0	0	0	0	0	0	0
1546	28S ribosomal protein S30, mitochondrial OS=Mus musculus OX=10090 GN=Mrps30 PE=1 SV=1	Q9D0G0	Mrps30	50 kDa		< 0.00010	1_4T1_cell high, 4T1_MV low, 4T1_sEV low	4	3	5	0	0	0	0	0	0	0	0	0
1547	Glutamate--cysteine ligase regulatory subunit OS=Mus musculus OX=10090 GN=Gclm PE=1 SV=1	O09172	Gclm	31 kDa		< 0.00010	1_4T1_cell high, 4T1_MV low, 4T1_sEV low	3	3	5	0	0	0	0	0	0	0	0	0
1548	Coatomer subunit zeta-1 OS=Mus musculus OX=10090 GN=Copz1 PE=1 SV=1	P61924	Copz1	20 kDa		0.0082	1_4T1_cell high, 4T1_MV low, 4T1_sEV low	1	5	5	0	0	0	0	0	0	0	0	0
1549	Ribosome biogenesis protein WDR12 OS=Mus musculus OX=10090 GN=Wdr12 PE=1 SV=1	Q9JJA4	Wdr12	47 kDa		< 0.00010	1_4T1_cell high, 4T1_MV low, 4T1_sEV low	3	4	5	0	0	0	0	0	0	0	0	0
1550	Influenza virus NS1A-binding protein homolog OS=Mus musculus OX=10090 GN=Ivns1abp PE=1 SV=2	Q920Q8	Ivns1abp	72 kDa		0.048	1_4T1_cell high, 4T1_MV low, 4T1_sEV low	1	2	7	0	0	0	0	0	0	0	0	0
1551	Protein mago nashi homolog OS=Mus musculus OX=10090 GN=Magoh PE=2 SV=1	P61327 (+1)	Magoh	17 kDa		0.0022	1_4T1_cell high, 4T1_MV low, 4T1_sEV low	2	3	5	0	0	0	0	1	0	0	0	0
1552	Ribosome biogenesis regulatory protein homolog OS=Mus musculus OX=10090 GN=Rrs1 PE=1 SV=1	Q9CYH6	Rrs1	42 kDa		0.028	1_4T1_cell high, 4T1_MV low, 4T1_sEV low	2	1	6	0	0	0	0	0	0	0	0	0
1553	Scaffold attachment factor B2 OS=Mus musculus OX=10090 GN=Safb2 PE=1 SV=2	Q80YR5	Safb2	112 kDa	TRUE	0.001	1_4T1_cell high, 4T1_MV low, 4T1_sEV low	2	3	6	0	0	0	0	0	0	0	0	0
1554	DNA ligase 3 OS=Mus musculus OX=10090 GN=Lig3 PE=1 SV=2	P97386	Lig3	113 kDa		0.00014	1_4T1_cell high, 4T1_MV low, 4T1_sEV low	2	3	5	0	0	0	0	0	0	0	0	0
1555	CDKN2A-interacting protein OS=Mus musculus OX=10090 GN=Cdkn2aip PE=1 SV=1	Q8BI72	Cdkn2aip	60 kDa		0.0038	1_4T1_cell high, 4T1_MV low, 4T1_sEV low	3	2	7	0	0	0	0	0	0	0	0	0
1556	Peroxiredoxin-like 2A OS=Mus musculus OX=10090 GN=Prxl2a PE=1 SV=2	Q9CYH2	Prxl2a	24 kDa		0.015	1_4T1_cell high, 4T1_MV low, 4T1_sEV low	5	5	1	0	0	0	0	0	0	0	0	0
1557	ATP-dependent Clp protease ATP-binding subunit clpX-like, mitochondrial OS=Mus musculus OX=10090 GN=Clpx PE=1 SV=2	Q9JHS4	Clpx	69 kDa		0.0021	1_4T1_cell high, 4T1_MV low, 4T1_sEV low	2	5	3	0	0	0	0	0	0	0	0	0
1558	SEC23-interacting protein OS=Mus musculus OX=10090 GN=Sec23ip PE=1 SV=2	Q6NZC7	Sec23ip	111 kDa		0.1	[]	0	2	5	0	0	0	0	0	0	0	0	0
1559	Palmitoyltransferase ZDHHC5 OS=Mus musculus OX=10090 GN=Zdhhc5 PE=1 SV=1	Q8VDZ4	Zdhhc5	78 kDa		0.69	[]	0	0	0	1	0	0	0	0	4	0	0	6
1560	Protein mono-ADP-ribosyltransferase PARP4 OS=Mus musculus OX=10090 GN=Parp4 PE=1 SV=1	E9PYK3	Parp4	216 kDa		0.28	[]	0	0	0	0	0	0	0	0	0	0	1	5
1561	Schlafen family member 9 OS=Mus musculus OX=10090 GN=Slfn9 PE=2 SV=1	B1ARD6	Slfn9	104 kDa		0.23	[]	1	0	6	0	0	0	0	0	0	0	0	0
1562	N-acetylglucosamine-1-phosphodiester alpha-N-acetylglucosaminidase OS=Mus musculus OX=10090 GN=Nagpa PE=1 SV=2	Q8BJ48	Nagpa	56 kDa		0.054	[]	0	0	0	5	7	0	0	0	0	0	0	0
1563	Attractin-like protein 1 OS=Mus musculus OX=10090 GN=Atrnl1 PE=1 SV=2	Q6A051	Atrnl1	152 kDa		0.061	[]	0	0	0	3	5	0	0	0	0	0	0	0
1564	RNA-binding protein Raly OS=Mus musculus OX=10090 GN=Raly PE=1 SV=3	Q64012	Raly	33 kDa		0.28	[]	0	1	8	0	0	0	0	0	0	0	0	0
1565	Carbonic anhydrase 1 OS=Mus musculus OX=10090 GN=Ca1 PE=1 SV=4	P13634	Ca1	28 kDa		0.44	[]	0	0	0	0	0	8	0	0	0	0	0	0
1566	Hemopexin OS=Mus musculus OX=10090 GN=Hpx PE=1 SV=2	Q91X72	Hpx	51 kDa		0.44	[]	0	0	0	0	0	6	0	0	0	0	0	0
1567	Zyxin OS=Mus musculus OX=10090 GN=Zyx PE=1 SV=2	Q62523	Zyx	61 kDa		0.25	[]	1	1	5	0	0	0	2	0	0	0	0	0
1568	Ribosome production factor 2 homolog OS=Mus musculus OX=10090 GN=Rpf2 PE=2 SV=2	Q9JJ80	Rpf2	35 kDa		0.018	1_4T1_cell high, 4T1_MV low, 4T1_sEV low	2	2	5	0	0	0	0	0	0	0	0	1
1569	Tumor necrosis factor receptor type 1-associated DEATH domain protein OS=Mus musculus OX=10090 GN=Tradd PE=1 SV=1	Q3U0V2	Tradd	35 kDa		0.0095	1_4T1_cell high, 4T1_MV low, 4T1_sEV low	3	5	2	0	0	0	0	1	0	0	0	0
1570	Bystin OS=Mus musculus OX=10090 GN=Bysl PE=1 SV=3	O54825	Bysl	50 kDa		0.12	[]	1	1	7	0	0	0	0	0	0	0	0	0
1571	Transcription elongation factor SPT5 OS=Mus musculus OX=10090 GN=Supt5h PE=1 SV=1	O55201	Supt5h	121 kDa		0.013	1_4T1_cell high, 4T1_MV low, 4T1_sEV low	1	2	5	0	0	0	0	0	0	0	0	0
1572	Vasodilator-stimulated phosphoprotein OS=Mus musculus OX=10090 GN=Vasp PE=1 SV=4	P70460	Vasp	40 kDa		0.0057	1_4T1_cell high, 4T1_MV low, 4T1_sEV low	1	3	5	0	0	0	0	0	0	0	0	0
1573	Ubiquitin-conjugating enzyme E2 C OS=Mus musculus OX=10090 GN=Ube2c PE=1 SV=1	Q9D1C1	Ube2c	20 kDa		0.0057	1_4T1_cell high, 4T1_MV low, 4T1_sEV low	1	3	5	0	0	0	0	0	0	0	0	0
1574	Cell division cycle protein 16 homolog OS=Mus musculus OX=10090 GN=Cdc16 PE=1 SV=1	Q8R349	Cdc16	71 kDa		0.00014	1_4T1_cell high, 4T1_MV low, 4T1_sEV low	2	3	5	0	0	0	0	0	0	0	0	0
1575	UDP-glucuronic acid decarboxylase 1 OS=Mus musculus OX=10090 GN=Uxs1 PE=1 SV=1	Q91XL3	Uxs1	48 kDa		0.064	[]	0	0	0	0	0	0	0	0	0	1	2	5
1576	mRNA turnover protein 4 homolog OS=Mus musculus OX=10090 GN=Mrto4 PE=1 SV=1	Q9D0I8	Mrto4	28 kDa		0.013	1_4T1_cell high, 4T1_MV low, 4T1_sEV low	2	2	7	0	0	0	0	0	0	0	0	0
1577	WD40 repeat-containing protein SMU1 OS=Mus musculus OX=10090 GN=Smu1 PE=2 SV=2	Q3UKJ7	Smu1	58 kDa		0.013	1_4T1_cell high, 4T1_MV low, 4T1_sEV low	2	2	7	0	0	0	0	0	0	0	0	0
1578	G-rich sequence factor 1 OS=Mus musculus OX=10090 GN=Grsf1 PE=1 SV=2	Q8C5Q4	Grsf1	53 kDa		0.013	1_4T1_cell high, 4T1_MV low, 4T1_sEV low	1	2	5	0	0	0	0	0	0	0	0	0
1579	Inorganic pyrophosphatase 2, mitochondrial OS=Mus musculus OX=10090 GN=Ppa2 PE=1 SV=1	Q91VM9	Ppa2	38 kDa		0.015	1_4T1_cell high, 4T1_MV low, 4T1_sEV low	5	5	1	0	0	0	0	0	0	0	0	0
1580	Bifunctional coenzyme A synthase OS=Mus musculus OX=10090 GN=Coasy PE=1 SV=2	Q9DBL7	Coasy	62 kDa		0.013	1_4T1_cell high, 4T1_MV low, 4T1_sEV low	4	5	1	0	0	0	0	0	0	0	0	0
1581	Peptidyl-prolyl cis-trans isomerase FKBP5 OS=Mus musculus OX=10090 GN=Fkbp5 PE=1 SV=1	Q64378	Fkbp5	51 kDa		0.14	[]	2	0	7	0	0	0	0	0	0	0	0	0
1582	Bifunctional heparan sulfate N-deacetylase/N-sulfotransferase 1 OS=Mus musculus OX=10090 GN=Ndst1 PE=1 SV=2	Q3UHN9	Ndst1	101 kDa		0.052	[]	0	0	0	4	5	0	0	0	0	0	0	0
1583	Trafficking protein particle complex subunit 3 OS=Mus musculus OX=10090 GN=Trappc3 PE=1 SV=1	O55013	Trappc3	20 kDa		0.11	[]	1	1	5	0	0	0	1	1	0	0	0	0
1584	Kinesin-like protein KIF2C OS=Mus musculus OX=10090 GN=Kif2c PE=1 SV=1	Q922S8	Kif2c	81 kDa	TRUE	0.028	1_4T1_cell high, 4T1_MV low, 4T1_sEV low	2	1	6	0	0	0	0	0	0	0	0	0
1585	ATP-binding cassette sub-family B member 10, mitochondrial OS=Mus musculus OX=10090 GN=Abcb10 PE=1 SV=1	Q9JI39	Abcb10	77 kDa		0.036	1_4T1_cell high, 4T1_MV low, 4T1_sEV low	2	5	1	0	0	0	0	0	0	0	0	0
1586	DNA-directed RNA polymerase II subunit RPB3 OS=Mus musculus OX=10090 GN=Polr2c PE=1 SV=2	P97760	Polr2c	31 kDa		0.013	1_4T1_cell high, 4T1_MV low, 4T1_sEV low	1	2	5	0	0	0	0	0	0	0	0	0
1587	Craniofacial development protein 1 OS=Mus musculus OX=10090 GN=Cfdp1 PE=1 SV=1	O88271	Cfdp1	33 kDa		0.0049	1_4T1_cell high, 4T1_MV low, 4T1_sEV low	2	2	6	0	0	0	0	0	0	0	0	0
1588	Serine/arginine-rich splicing factor 9 OS=Mus musculus OX=10090 GN=Srsf9 PE=1 SV=1	Q9D0B0	Srsf9	26 kDa		0.2	[]	1	0	5	0	0	0	0	0	0	0	0	0
1589	Mitochondrial Rho GTPase 1 OS=Mus musculus OX=10090 GN=Rhot1 PE=1 SV=1	Q8BG51	Rhot1	72 kDa		0.054	[]	4	5	0	0	0	0	0	0	0	0	0	0
1590	Aldehyde dehydrogenase family 3 member B1 OS=Mus musculus OX=10090 GN=Aldh3b1 PE=1 SV=1	Q80VQ0	Aldh3b1	52 kDa		0.075	[]	0	0	0	3	6	0	0	0	0	0	0	0
1591	Phosphoserine phosphatase OS=Mus musculus OX=10090 GN=Psph PE=1 SV=1	Q99LS3	Psph	25 kDa		0.12	[]	1	1	5	0	0	0	0	1	0	0	0	0
1592	Mitochondrial import receptor subunit TOM40 homolog OS=Mus musculus OX=10090 GN=Tomm40 PE=1 SV=3	Q9QYA2	Tomm40	38 kDa		0.29	[]	0	0	5	1	1	0	0	0	0	0	0	0
1593	U4/U6 small nuclear ribonucleoprotein Prp4 OS=Mus musculus OX=10090 GN=Prpf4 PE=1 SV=1	Q9DAW6	Prpf4	58 kDa		0.085	[]	1	1	6	0	0	0	0	0	0	0	0	0
1594	Double-strand-break repair protein rad21 homolog OS=Mus musculus OX=10090 GN=Rad21 PE=1 SV=3	Q61550	Rad21	72 kDa		0.053	[]	1	1	5	0	0	0	0	0	0	0	0	0
1595	Alpha-taxilin OS=Mus musculus OX=10090 GN=Txlna PE=1 SV=1	Q6PAM1	Txlna	62 kDa		0.12	[]	1	1	7	0	0	0	0	0	0	0	0	0
1596	Sulfide:quinone oxidoreductase, mitochondrial OS=Mus musculus OX=10090 GN=Sqor PE=1 SV=3	Q9R112	Sqor	50 kDa		0.082	[]	5	3	0	0	0	0	0	0	0	0	0	0
1597	Superkiller complex protein 3 OS=Mus musculus OX=10090 GN=Skic3 PE=3 SV=1	SKI3_MOUSE	Skic3	?	TRUE	0.28	[]	1	7	0	0	0	0	0	0	0	0	0	0
1598	Cingulin-like protein 1 OS=Mus musculus OX=10090 GN=Cgnl1 PE=1 SV=2	Q6AW69	Cgnl1	148 kDa		0.44	[]	0	0	7	0	0	0	0	0	0	0	0	0
1599	Splicing factor 3B subunit 2 OS=Mus musculus OX=10090 GN=Sf3b2 PE=2 SV=1	Q3UJB0	Sf3b2	98 kDa	TRUE	0.44	[]	0	0	7	0	0	0	0	0	0	0	0	0
1600	39S ribosomal protein L12, mitochondrial OS=Mus musculus OX=10090 GN=Mrpl12 PE=1 SV=2	Q9DB15	Mrpl12	22 kDa		0.013	1_4T1_cell high, 4T1_MV low, 4T1_sEV low	2	1	5	0	0	0	0	0	0	0	0	0
1601	Serine/threonine-protein kinase VRK1 OS=Mus musculus OX=10090 GN=Vrk1 PE=1 SV=2	Q80X41	Vrk1	50 kDa		0.053	[]	1	1	5	0	0	0	0	0	0	0	0	0
1602	Serine/threonine-protein kinase Chk1 OS=Mus musculus OX=10090 GN=Chek1 PE=1 SV=2	O35280	Chek1	54 kDa		0.44	[]	0	0	5	0	0	0	0	0	0	0	0	0
1603	ATP-dependent RNA helicase DDX24 OS=Mus musculus OX=10090 GN=Ddx24 PE=1 SV=2	Q9ESV0	Ddx24	96 kDa		0.21	[]	0	1	5	0	0	0	0	0	0	0	0	0
1604	Nucleolar protein 14 OS=Mus musculus OX=10090 GN=Nop14 PE=1 SV=2	Q8R3N1	Nop14	99 kDa		0.053	[]	1	1	5	0	0	0	0	0	0	0	0	0
1605	Nucleolar GTP-binding protein 2 OS=Mus musculus OX=10090 GN=Gnl2 PE=1 SV=2	Q99LH1	Gnl2	83 kDa		0.2	[]	1	0	5	0	0	0	0	0	0	0	0	0
1606	X-ray repair cross-complementing protein 6 OS=Mus musculus OX=10090 GN=Xrcc6 PE=1 SV=5	P23475	Xrcc6	69 kDa		0.12	[]	2	5	0	0	0	0	0	0	0	0	0	0
1607	U3 small nucleolar RNA-associated protein 18 homolog OS=Mus musculus OX=10090 GN=Utp18 PE=1 SV=1	Q5SSI6	Utp18	61 kDa		0.24	[]	0	1	6	0	0	0	0	0	0	0	0	0
1608	Bromodomain adjacent to zinc finger domain protein 1A OS=Mus musculus OX=10090 GN=Baz1a PE=1 SV=3	O88379	Baz1a	178 kDa		0.44	[]	0	0	6	0	0	0	0	0	0	0	0	0
1609	Golgi-specific brefeldin A-resistance guanine nucleotide exchange factor 1 OS=Mus musculus OX=10090 GN=Gbf1 PE=1 SV=1	Q6DFZ1	Gbf1	207 kDa	TRUE	0.44	[]	0	0	6	0	0	0	0	0	0	0	0	0
1610	GTP-binding protein 4 OS=Mus musculus OX=10090 GN=Gtpbp4 PE=1 SV=3	Q99ME9	Gtpbp4	74 kDa		0.44	[]	0	0	7	0	0	0	0	0	0	0	0	0
1611	WD repeat and HMG-box DNA-binding protein 1 OS=Mus musculus OX=10090 GN=Wdhd1 PE=1 SV=2	P59328	Wdhd1	124 kDa		0.2	[]	1	0	5	0	0	0	0	0	0	0	0	0
1612	Protein timeless homolog OS=Mus musculus OX=10090 GN=Timeless PE=1 SV=3	Q9R1X4	Timeless	138 kDa		0.44	[]	0	0	5	0	0	0	0	0	0	0	0	0
1613	Pinin OS=Mus musculus OX=10090 GN=Pnn PE=1 SV=4	O35691	Pnn	82 kDa		0.44	[]	0	0	5	0	0	0	0	0	0	0	0	0
END OF FILE
