# Supplementary material for: A new class of extracellular vesicles, Motile Vesicles (“MoVes”), carry whole genome DNA and are emitted during active cancer cell migration
Source: Research Square preprint supplement (doi:10.21203/rs.3.rs-7054528/v1), 2025-07-21
Supplement: Supplementary file 5 [file f72c25e6a9839c008aa287e8.xlsx]

## Sheet: shared_variants
CHROM	POS	REF	ALT	CLASS	GENE	GENE_ID	FEATURE_TYPE	FEATURE_ID	TRANSCRIPT_BIOTYPE	DNA_CHANGE	AA_CHANGE	4T1_EV_DNA_1_GT	4T1_EV_DNA_1_DP	4T1_EV_DNA_1_AF	4T1_EV_DNA_2_GT	4T1_EV_DNA_2_DP	4T1_EV_DNA_2_AF	4T1_cell_genomic_DNA_1_GT	4T1_cell_genomic_DNA_1_DP	4T1_cell_genomic_DNA_1_AF	4T1_cell_genomic_DNA_2_GT	4T1_cell_genomic_DNA_2_DP	4T1_cell_genomic_DNA_2_AF
1	4923841	G	C	splice_region_variant&intron_variant	Rgs20	ENSMUSG00000002459	transcript	ENSMUST00000118000	protein_coding	c.611+6C>G		1|1	17	1	1|1	9	1	1|1	15	1	1|1	29	1
1	4923964	A	C	start_lost	Rgs20	ENSMUSG00000002459	transcript	ENSMUST00000119256	protein_coding	c.2T>G	p.Met1?	1|1	18	1	1|1	16	1	1|1	12	1	1|1	34	1
1	5124338	A	G	missense_variant	Atp6v1h	ENSMUSG00000033793	transcript	ENSMUST00000044369	protein_coding	c.739A>G	p.Ile247Val	1|1	21	1	1|1	25	1	1|1	22	1	1|1	32	1
1	6214740	G	C	missense_variant	4732440D04Rik	ENSMUSG00000073741	transcript	ENSMUST00000097832	protein_coding	c.553C>G	p.Pro185Ala	1|1	16	1	1|1	10	1	1|1	14	1	1|1	17	1
1	6214823	G	C	missense_variant	4732440D04Rik	ENSMUSG00000073741	transcript	ENSMUST00000097832	protein_coding	c.470C>G	p.Pro157Arg	1|1	12	1	1|1	15	1	1|1	13	1	1|1	15	1
1	6215064	G	C	missense_variant	4732440D04Rik	ENSMUSG00000073741	transcript	ENSMUST00000097832	protein_coding	c.229C>G	p.Pro77Ala	1|1	12	1	1|1	16	1	1|1	9	1	1|1	27	1
1	6240127	A	T	missense_variant	Rb1cc1	ENSMUSG00000025907	transcript	ENSMUST00000027040	protein_coding	c.748A>T	p.Thr250Ser	1|1	32	1	1|1	17	1	1|1	24	1	1|1	30	1
1	6249843	A	T	missense_variant	Rb1cc1	ENSMUSG00000025907	transcript	ENSMUST00000027040	protein_coding	c.3485A>T	p.Tyr1162Phe	1|1	27	1	1|1	22	1	1|1	30	1	1|1	22	1
1	6249969	T	G	missense_variant	Rb1cc1	ENSMUSG00000025907	transcript	ENSMUST00000027040	protein_coding	c.3611T>G	p.Leu1204Arg	1|1	29	1	1|1	16	1	1|1	27	1	1|1	34	1
1	8675975	C	G	splice_region_variant&non_coding_transcript_exon_variant	Sntg1	ENSMUSG00000025909	transcript	ENSMUST00000144593	nonsense_mediated_decay	n.*1956G>C		1|1	17	1	1|1	10	1	1|1	19	1	1|1	25	1
1	9299800	G	A	5_prime_UTR_premature_start_codon_gain_variant	Sntg1	ENSMUSG00000025909	transcript	ENSMUST00000140302	nonsense_mediated_decay	n.-1841C>T		1|1	23	1	1|1	18	1	1|1	21	1	1|1	25	1
1	9545597	C	T	missense_variant	Rrs1	ENSMUSG00000061024	transcript	ENSMUST00000072079	protein_coding	c.74C>T	p.Thr25Met	0|1	34	0.5	0|1	40	0.5	0|1	33	0.39	0|1	53	0.68
1	9545621	A	T	missense_variant	Rrs1	ENSMUSG00000061024	transcript	ENSMUST00000072079	protein_coding	c.98A>T	p.Glu33Val	0|1	34	0.56	0/1	39	0.51	0/1	28	0.54	0/1	56	0.64
1	9545654	G	A	missense_variant	Rrs1	ENSMUSG00000061024	transcript	ENSMUST00000072079	protein_coding	c.131G>A	p.Arg44His	0|1	27	0.63	0|1	39	0.54	0|1	26	0.65	0|1	60	0.68
1	9545663	C	T	missense_variant	Rrs1	ENSMUSG00000061024	transcript	ENSMUST00000072079	protein_coding	c.140C>T	p.Pro47Leu	0|1	29	0.62	0|1	38	0.53	0|1	27	0.67	0|1	58	0.67
1	9545666	C	T	missense_variant	Rrs1	ENSMUSG00000061024	transcript	ENSMUST00000072079	protein_coding	c.143C>T	p.Thr48Ile	0|1	29	0.62	0|1	34	0.5	0|1	24	0.67	0|1	57	0.67
1	9545668	G	A	missense_variant	Rrs1	ENSMUSG00000061024	transcript	ENSMUST00000072079	protein_coding	c.145G>A	p.Val49Met	0|1	30	0.63	0|1	34	0.5	0|1	23	0.7	0|1	60	0.63
1	9545674	C	T	missense_variant	Rrs1	ENSMUSG00000061024	transcript	ENSMUST00000072079	protein_coding	c.151C>T	p.Arg51Cys	0|1	32	0.62	0|1	35	0.49	0|1	24	0.67	0|1	59	0.64
1	9545684	G	T	missense_variant	Rrs1	ENSMUSG00000061024	transcript	ENSMUST00000072079	protein_coding	c.161G>T	p.Gly54Val	0|1	37	0.65	0|1	35	0.49	0|1	23	0.65	0|1	59	0.64
1	9545693	C	T	missense_variant	Rrs1	ENSMUSG00000061024	transcript	ENSMUST00000072079	protein_coding	c.170C>T	p.Pro57Leu	0|1	36	0.69	0|1	36	0.5	0|1	23	0.61	0|1	59	0.66
1	9545762	C	A	missense_variant	Rrs1	ENSMUSG00000061024	transcript	ENSMUST00000072079	protein_coding	c.239C>A	p.Pro80Gln	0|1	38	0.63	0|1	40	0.57	0|1	28	0.46	0|1	47	0.55
1	9545767	G	A	missense_variant	Rrs1	ENSMUSG00000061024	transcript	ENSMUST00000072079	protein_coding	c.244G>A	p.Glu82Lys	0|1	38	0.63	0|1	41	0.56	0|1	28	0.46	0|1	49	0.57
1	9545801	C	A	missense_variant	Rrs1	ENSMUSG00000061024	transcript	ENSMUST00000072079	protein_coding	c.278C>A	p.Pro93Gln	0|1	41	0.71	0|1	39	0.56	0|1	32	0.44	0|1	44	0.61
1	9545840	C	A	missense_variant	Rrs1	ENSMUSG00000061024	transcript	ENSMUST00000072079	protein_coding	c.317C>A	p.Pro106His	0|1	40	0.57	0|1	39	0.56	0|1	39	0.41	0|1	46	0.65
1	9545860	C	A	missense_variant	Rrs1	ENSMUSG00000061024	transcript	ENSMUST00000072079	protein_coding	c.337C>A	p.Arg113Ser	0/1	42	0.52	0/1	41	0.56	0/1	39	0.44	0/1	49	0.59
1	9545875	G	C	missense_variant	Rrs1	ENSMUSG00000061024	transcript	ENSMUST00000072079	protein_coding	c.352G>C	p.Ala118Pro	0|1	41	0.51	0|1	40	0.6	0|1	37	0.46	0|1	50	0.6
1	9545876	C	T	missense_variant	Rrs1	ENSMUSG00000061024	transcript	ENSMUST00000072079	protein_coding	c.353C>T	p.Ala118Val	0|1	41	0.51	0|1	40	0.6	0|1	37	0.46	0|1	50	0.6
1	9545894	G	T	missense_variant	Rrs1	ENSMUSG00000061024	transcript	ENSMUST00000072079	protein_coding	c.371G>T	p.Arg124Leu	0/1	39	0.59	0/1	40	0.55	0/1	33	0.52	0/1	44	0.59
1	9545925	C	A	missense_variant	Rrs1	ENSMUSG00000061024	transcript	ENSMUST00000072079	protein_coding	c.402C>A	p.Asp134Glu	0/1	41	0.63	0/1	40	0.5	0/1	41	0.44	0/1	38	0.61
1	9545951	G	T	missense_variant	Rrs1	ENSMUSG00000061024	transcript	ENSMUST00000072079	protein_coding	c.428G>T	p.Arg143Leu	0|1	37	0.54	0|1	37	0.46	0|1	37	0.41	0|1	34	0.53
1	9545992	C	G	missense_variant	Rrs1	ENSMUSG00000061024	transcript	ENSMUST00000072079	protein_coding	c.469C>G	p.Leu157Val	0|1	32	0.56	0|1	29	0.38	0|1	35	0.34	0|1	29	0.38
1	9546013	G	T	missense_variant	Rrs1	ENSMUSG00000061024	transcript	ENSMUST00000072079	protein_coding	c.490G>T	p.Ala164Ser	0|1	27	0.59	0|1	24	0.29	0|1	37	0.35	0|1	29	0.38
1	9546016	G	A	missense_variant	Rrs1	ENSMUSG00000061024	transcript	ENSMUST00000072079	protein_coding	c.493G>A	p.Asp165Asn	0|1	27	0.59	0|1	24	0.29	0|1	38	0.37	0|1	29	0.38
1	9546103	GCT	G	frameshift_variant	Rrs1	ENSMUSG00000061024	transcript	ENSMUST00000072079	protein_coding	c.582_583delTC	p.His197fs	0/1	35	0.46	0/1	21	0.52	0/1	42	0.45	0/1	48	0.38
1	9546215	C	T	missense_variant	Rrs1	ENSMUSG00000061024	transcript	ENSMUST00000072079	protein_coding	c.692C>T	p.Ser231Leu	0|1	56	0.52	0|1	50	0.66	0|1	43	0.56	0|1	70	0.5
1	9546223	C	T	missense_variant	Rrs1	ENSMUSG00000061024	transcript	ENSMUST00000072079	protein_coding	c.700C>T	p.Arg234Cys	0|1	55	0.53	0|1	46	0.67	0|1	42	0.57	0|1	67	0.49
1	9546259	C	T	missense_variant	Rrs1	ENSMUSG00000061024	transcript	ENSMUST00000072079	protein_coding	c.736C>T	p.Arg246Trp	0|1	57	0.53	0|1	51	0.59	0|1	38	0.58	0|1	69	0.54
1	9546268	G	T	missense_variant	Rrs1	ENSMUSG00000061024	transcript	ENSMUST00000072079	protein_coding	c.745G>T	p.Gly249Cys	0|1	56	0.54	0|1	51	0.57	0|1	36	0.56	0|1	68	0.53
1	9546313	G	A	missense_variant	Rrs1	ENSMUSG00000061024	transcript	ENSMUST00000072079	protein_coding	c.790G>A	p.Glu264Lys	0|1	47	0.53	0|1	38	0.45	0|1	36	0.56	0|1	54	0.57
1	9546338	T	A	missense_variant	Rrs1	ENSMUSG00000061024	transcript	ENSMUST00000072079	protein_coding	c.815T>A	p.Leu272His	0|1	41	0.41	0|1	33	0.36	0|1	37	0.43	0|1	40	0.55
1	9546341	G	T	missense_variant	Rrs1	ENSMUSG00000061024	transcript	ENSMUST00000072079	protein_coding	c.818G>T	p.Arg273Leu	0|1	40	0.42	0|1	33	0.36	0|1	37	0.43	0|1	40	0.55
1	9546377	C	T	missense_variant	Rrs1	ENSMUSG00000061024	transcript	ENSMUST00000072079	protein_coding	c.854C>T	p.Thr285Met	0|1	31	0.32	0|1	37	0.3	0|1	42	0.36	0|1	32	0.44
1	9546452	G	A	missense_variant	Rrs1	ENSMUSG00000061024	transcript	ENSMUST00000072079	protein_coding	c.929G>A	p.Gly310Asp	0/1	29	0.41	0/1	50	0.44	0/1	49	0.31	0/1	33	0.42
1	9546478	C	T	missense_variant	Rrs1	ENSMUSG00000061024	transcript	ENSMUST00000072079	protein_coding	c.955C>T	p.Pro319Ser	0/1	37	0.54	0/1	51	0.49	0/1	49	0.29	0/1	33	0.42
1	9546533	G	A	missense_variant	Rrs1	ENSMUSG00000061024	transcript	ENSMUST00000072079	protein_coding	c.1010G>A	p.Gly337Asp	0/1	47	0.49	0/1	45	0.4	0/1	40	0.2	0/1	37	0.41
1	9546572	C	G	missense_variant	Rrs1	ENSMUSG00000061024	transcript	ENSMUST00000072079	protein_coding	c.1049C>G	p.Ala350Gly	0|1	42	0.48	0|1	28	0.25	0|1	43	0.14	0|1	37	0.24
1	9724699	A	G	missense_variant	Vcpip1	ENSMUSG00000045210	transcript	ENSMUST00000057438	protein_coding	c.3446T>C	p.Val1149Ala	1|1	19	1	1|1	12	1	1|1	18	1	1|1	40	1
1	9780436	C	T	splice_region_variant&intron_variant	1700034P13Rik	ENSMUSG00000097893	transcript	ENSMUST00000181358	lincRNA	n.812+5C>T		1|1	26	1	1|1	19	1	1|1	35	1	1|1	31	1
1	9780728	A	G	splice_acceptor_variant&intron_variant	1700034P13Rik	ENSMUSG00000097893	transcript	ENSMUST00000181358	lincRNA	n.813-2A>G		1|1	29	1	1|1	30	1	1|1	32	1	1|1	44	1
1	9834499	G	A	splice_region_variant&non_coding_transcript_exon_variant	Gm22607	ENSMUSG00000088916	transcript	ENSMUST00000158291	snRNA	n.104C>T		1|1	26	1	1|1	24	1	1|1	14	1	1|1	32	1
1	9888860	AT	A	splice_region_variant&intron_variant	Sgk3	ENSMUSG00000025915	transcript	ENSMUST00000097826	protein_coding	c.1075-5delT		1|1	19	1	1|1	21	1	1|1	28	1	1|1	34	1
1	9908694	A	G	splice_region_variant&intron_variant	Mcmdc2	ENSMUSG00000046101	transcript	ENSMUST00000140948	protein_coding	c.-19+4A>G		1|1	16	1	1|1	11	1	1|1	26	1	1|1	28	1
1	9932176	G	A	missense_variant	Mcmdc2	ENSMUSG00000046101	transcript	ENSMUST00000140948	protein_coding	c.1621G>A	p.Glu541Lys	1|1	36	1	1|1	22	1	1|1	23	1	1|1	34	1
1	9937100	G	A	missense_variant	Mcmdc2	ENSMUSG00000046101	transcript	ENSMUST00000140948	protein_coding	c.1874G>A	p.Arg625Lys	1|1	21	1	1|1	29	1	1|1	21	1	1|1	40	1
1	9940386	C	G	missense_variant	Mcmdc2	ENSMUSG00000046101	transcript	ENSMUST00000140948	protein_coding	c.1888C>G	p.Pro630Ala	1|1	27	1	1|1	26	1	1|1	33	1	1|1	38	1
1	9940917	A	AT	frameshift_variant&stop_gained	Mcmdc2	ENSMUSG00000046101	transcript	ENSMUST00000140948	protein_coding	c.2043dupT	p.Lys682fs	1|1	14	1	1|1	25	1	1|1	36	1	1|1	26	1
1	9961307	G	A	5_prime_UTR_premature_start_codon_gain_variant	Gm10567	ENSMUSG00000073738	transcript	ENSMUST00000097824	protein_coding	c.-183C>T		1|1	30	1	1|1	15	1	1|1	35	1	1|1	28	1
1	10719615	G	A	missense_variant	Cpa6	ENSMUSG00000042501	transcript	ENSMUST00000035577	protein_coding	c.113C>T	p.Ala38Val	1|1	28	1	1|1	36	1	1|1	22	1	1|1	38	1
1	11110277	G	A	splice_region_variant&intron_variant	Prex2	ENSMUSG00000048960	transcript	ENSMUST00000027056	protein_coding	c.1070-5G>A		1|1	13	1	1|1	13	1	1|1	18	0.94	1|1	18	1
1	11170680	A	G	missense_variant	Prex2	ENSMUSG00000048960	transcript	ENSMUST00000027056	protein_coding	c.3011A>G	p.Gln1004Arg	1|1	26	1	1|1	11	1	1|1	13	1	1|1	14	1
1	11599988	T	TA	splice_region_variant	A830018L16Rik	ENSMUSG00000057715	transcript	ENSMUST00000141339	protein_coding	c.*3007dupA		1|1	27	1	1|1	29	1	1|1	22	1	1|1	40	1
1	11933536	A	G	splice_region_variant&intron_variant	A830018L16Rik	ENSMUSG00000057715	transcript	ENSMUST00000137824	protein_coding	c.1147-8A>G		1|1	35	1	1|1	26	1	1|1	26	1	1|1	26	1
1	12944115	GGA	G	splice_region_variant&intron_variant	Slco5a1	ENSMUSG00000025938	transcript	ENSMUST00000115403	protein_coding	c.917-5_917-4delTC		1|1	21	1	1|1	37	1	1|1	25	1	1|1	23	1
1	13062029	A	C	missense_variant	Gm5250	ENSMUSG00000069620	transcript	ENSMUST00000059065	protein_coding	c.11A>C	p.Gln4Pro	1|1	23	1	1|1	34	1	1|1	17	1	1|1	29	1
1	13122474	C	T	missense_variant	Prdm14	ENSMUSG00000042414	transcript	ENSMUST00000047577	protein_coding	c.1040G>A	p.Arg347Gln	1|1	26	1	1|1	31	1	1|1	22	1	1|1	32	1
1	13125649	C	T	missense_variant	Prdm14	ENSMUSG00000042414	transcript	ENSMUST00000047577	protein_coding	c.187G>A	p.Ala63Thr	1|1	38	1	1|1	25	1	1|1	8	1	1|1	31	1
1	13149111	TAAAAAC	T	splice_region_variant&intron_variant	Ncoa2	ENSMUSG00000005886	transcript	ENSMUST00000006037	protein_coding	c.3911-9_3911-4delGTTTTT		1|1	22	1	1|1	31	1	1|1	26	1	1|1	30	1
1	13700937	G	A	missense_variant	Xkr9	ENSMUSG00000067813	transcript	ENSMUST00000088542	protein_coding	c.676G>A	p.Val226Ile	1|1	24	1	1|1	24	1	1|1	19	1	1|1	30	1
1	15710459	T	A	missense_variant	Kcnb2	ENSMUSG00000092083	transcript	ENSMUST00000171715	protein_coding	c.1554T>A	p.Asn518Lys	1|1	23	1	1|1	32	1	1|1	18	1	1|1	26	1
1	16667687	A	G	missense_variant	Tmem70	ENSMUSG00000025940	transcript	ENSMUST00000177501	protein_coding	c.221A>G	p.Gln74Arg	1|1	18	1	1|1	17	1	1|1	30	1	1|1	36	1
1	16768820	C	T	missense_variant	Gm5828	ENSMUSG00000091020	transcript	ENSMUST00000071842	protein_coding	c.1319G>A	p.Arg440Gln	1|1	22	1	1|1	24	1	1|1	23	1	1|1	38	1
1	16768837	C	T	missense_variant	Gm5828	ENSMUSG00000091020	transcript	ENSMUST00000071842	protein_coding	c.1302G>A	p.Met434Ile	1|1	23	1	1|1	22	1	1|1	23	1	1|1	35	1
1	16768964	C	G	missense_variant	Gm5828	ENSMUSG00000091020	transcript	ENSMUST00000071842	protein_coding	c.1175G>C	p.Gly392Ala	1|1	26	1	1|1	23	1	1|1	32	1	1|1	29	1
1	16769166	C	G	missense_variant	Gm5828	ENSMUSG00000091020	transcript	ENSMUST00000071842	protein_coding	c.973G>C	p.Ala325Pro	1|1	36	1	1|1	21	1	1|1	23	1	1|1	37	1
1	16769190	G	T	missense_variant	Gm5828	ENSMUSG00000091020	transcript	ENSMUST00000071842	protein_coding	c.949C>A	p.Pro317Thr	1|1	38	1	1|1	20	1	1|1	18	1	1|1	36	1
1	16769945	T	C	missense_variant	Gm5828	ENSMUSG00000091020	transcript	ENSMUST00000071842	protein_coding	c.194A>G	p.His65Arg	1|1	28	1	1|1	31	1	1|1	21	1	1|1	27	1
1	16769997	G	A	missense_variant	Gm5828	ENSMUSG00000091020	transcript	ENSMUST00000071842	protein_coding	c.142C>T	p.Pro48Ser	1|1	30	1	1|1	29	1	1|1	18	1	1|1	25	1
1	16770058	T	G	missense_variant	Gm5828	ENSMUSG00000091020	transcript	ENSMUST00000071842	protein_coding	c.81A>C	p.Leu27Phe	1|1	32	1	1|1	29	1	1|1	22	1	1|1	31	1
1	19153730	G	C	splice_region_variant&non_coding_transcript_exon_variant	Gm10075	ENSMUSG00000060128	transcript	ENSMUST00000073196	pseudogene	n.237C>G		0|1	25	0.56	0|1	17	0.47	0|1	17	0.12	0|1	37	0.14
1	19153731	ATG	A	splice_region_variant&non_coding_transcript_exon_variant	Gm10075	ENSMUSG00000060128	transcript	ENSMUST00000073196	pseudogene	n.234_235delCA		0|1	25	0.56	0|1	17	0.47	0|1	18	0.11	0|1	37	0.14
1	20058321	C	T	missense_variant	Pkhd1	ENSMUSG00000043760	transcript	ENSMUST00000088448	protein_coding	c.12157G>A	p.Ala4053Thr	1|1	11	1	1|1	18	1	1|1	23	1	1|1	36	1
1	20058333	T	C	missense_variant	Pkhd1	ENSMUSG00000043760	transcript	ENSMUST00000088448	protein_coding	c.12145A>G	p.Ser4049Gly	1|1	9	1	1|1	18	1	1|1	25	1	1|1	34	1
1	20058600	T	C	missense_variant	Pkhd1	ENSMUSG00000043760	transcript	ENSMUST00000088448	protein_coding	c.11878A>G	p.Thr3960Ala	1|1	24	1	1|1	16	1	1|1	13	1	1|1	33	1
1	20058611	T	C	missense_variant	Pkhd1	ENSMUSG00000043760	transcript	ENSMUST00000088448	protein_coding	c.11867A>G	p.Glu3956Gly	1|1	24	1	1|1	15	1	1|1	15	1	1|1	33	1
1	20200552	C	T	missense_variant	Pkhd1	ENSMUSG00000043760	transcript	ENSMUST00000088448	protein_coding	c.9776G>A	p.Arg3259His	1|1	27	1	1|1	16	1	1|1	25	1	1|1	32	1
1	20209281	C	T	missense_variant	Pkhd1	ENSMUSG00000043760	transcript	ENSMUST00000088448	protein_coding	c.8812G>A	p.Val2938Ile	1|1	16	1	1|1	17	1	1|1	17	1	1|1	44	1
1	20209301	G	A	missense_variant	Pkhd1	ENSMUSG00000043760	transcript	ENSMUST00000088448	protein_coding	c.8792C>T	p.Thr2931Ile	1|1	17	1	1|1	17	1	1|1	15	1	1|1	42	1
1	20350460	C	T	missense_variant	Pkhd1	ENSMUSG00000043760	transcript	ENSMUST00000088448	protein_coding	c.7421G>A	p.Gly2474Asp	1|1	13	1	1|1	13	1	1|1	28	1	1|1	31	1
1	20358889	G	T	missense_variant	Pkhd1	ENSMUSG00000043760	transcript	ENSMUST00000088448	protein_coding	c.7286C>A	p.Ala2429Glu	1|1	9	1	1|1	13	1	1|1	25	1	1|1	40	1
1	20391625	GA	G	splice_region_variant&intron_variant	Pkhd1	ENSMUSG00000043760	transcript	ENSMUST00000088448	protein_coding	c.6318-4delT		1|1	13	0.92	1|1	17	1	1|1	21	1	1|1	34	1
1	20509040	C	T	missense_variant	Pkhd1	ENSMUSG00000043760	transcript	ENSMUST00000088448	protein_coding	c.5441G>A	p.Arg1814Gln	1|1	24	1	1|1	23	1	1|1	19	1	1|1	28	1
1	20520157	G	C	missense_variant	Pkhd1	ENSMUSG00000043760	transcript	ENSMUST00000088448	protein_coding	c.5365C>G	p.His1789Asp	1|1	13	1	1|1	17	1	1|1	14	1	1|1	34	1
1	20522979	T	C	missense_variant	Pkhd1	ENSMUSG00000043760	transcript	ENSMUST00000088448	protein_coding	c.4909A>G	p.Asn1637Asp	1|1	22	1	1|1	18	1	1|1	24	1	1|1	28	1
1	20523048	A	T	missense_variant	Pkhd1	ENSMUSG00000043760	transcript	ENSMUST00000088448	protein_coding	c.4840T>A	p.Phe1614Ile	1|1	23	1	1|1	16	1	1|1	25	1	1|1	36	1
1	20523125	G	A	missense_variant	Pkhd1	ENSMUSG00000043760	transcript	ENSMUST00000088448	protein_coding	c.4763C>T	p.Thr1588Met	1|1	23	1	1|1	14	1	1|1	19	1	1|1	43	1
1	20523440	A	T	missense_variant	Pkhd1	ENSMUSG00000043760	transcript	ENSMUST00000088448	protein_coding	c.4448T>A	p.Ile1483Asn	1|1	34	1	1|1	27	1	1|1	15	1	1|1	33	1
1	20523851	G	A	missense_variant	Pkhd1	ENSMUSG00000043760	transcript	ENSMUST00000088448	protein_coding	c.4037C>T	p.Ser1346Phe	1|1	13	1	1|1	27	1	1|1	29	1	1|1	37	1
1	20524097	A	G	missense_variant	Pkhd1	ENSMUSG00000043760	transcript	ENSMUST00000088448	protein_coding	c.3791T>C	p.Leu1264Pro	1|1	23	1	1|1	26	1	1|1	19	1	1|1	29	1
1	20524250	C	T	missense_variant	Pkhd1	ENSMUSG00000043760	transcript	ENSMUST00000088448	protein_coding	c.3638G>A	p.Ser1213Asn	1|1	23	1	1|1	31	1	1|1	44	1	1|1	15	1
1	20534578	A	G	missense_variant	Pkhd1	ENSMUSG00000043760	transcript	ENSMUST00000088448	protein_coding	c.3512T>C	p.Val1171Ala	1|1	29	1	1|1	21	1	1|1	12	1	1|1	29	1
1	20537401	T	A	missense_variant	Pkhd1	ENSMUSG00000043760	transcript	ENSMUST00000088448	protein_coding	c.3230A>T	p.Asp1077Val	1|1	21	1	1|1	29	1	1|1	29	1	1|1	36	1
1	20547347	G	T	missense_variant	Pkhd1	ENSMUSG00000043760	transcript	ENSMUST00000088448	protein_coding	c.3013C>A	p.His1005Asn	1|1	24	1	1|1	20	1	1|1	26	1	1|1	34	1
1	20553472	G	T	missense_variant	Pkhd1	ENSMUSG00000043760	transcript	ENSMUST00000088448	protein_coding	c.2398C>A	p.Pro800Thr	1|1	30	1	1|1	31	1	1|1	26	1	1|1	29	1
1	20558674	G	A	missense_variant	Pkhd1	ENSMUSG00000043760	transcript	ENSMUST00000088448	protein_coding	c.2048C>T	p.Ala683Val	1|1	22	1	1|1	31	1	1|1	21	1	1|1	21	1
1	20558708	T	G	missense_variant	Pkhd1	ENSMUSG00000043760	transcript	ENSMUST00000088448	protein_coding	c.2014A>C	p.Ile672Leu	1|1	19	1	1|1	28	1	1|1	20	1	1|1	24	1
1	20559437	C	T	missense_variant	Pkhd1	ENSMUSG00000043760	transcript	ENSMUST00000088448	protein_coding	c.1942G>A	p.Asp648Asn	1|1	17	1	1|1	15	1	1|1	21	1	1|1	34	1
1	20559475	G	T	missense_variant	Pkhd1	ENSMUSG00000043760	transcript	ENSMUST00000088448	protein_coding	c.1904C>A	p.Thr635Asn	1|1	15	1	1|1	15	1	1|1	17	1	1|1	21	1
1	20562376	A	G	missense_variant	Pkhd1	ENSMUSG00000043760	transcript	ENSMUST00000088448	protein_coding	c.1814T>C	p.Leu605Pro	1|1	23	1	1|1	28	1	1|1	29	1	1|1	24	1
1	20562472	C	A	missense_variant	Pkhd1	ENSMUSG00000043760	transcript	ENSMUST00000088448	protein_coding	c.1718G>T	p.Arg573Leu	1|1	27	1	1|1	28	1	1|1	32	1	1|1	23	1
1	20562508	A	T	splice_region_variant&intron_variant	Pkhd1	ENSMUSG00000043760	transcript	ENSMUST00000088448	protein_coding	c.1688-6T>A		1|1	33	1	1|1	29	1	1|1	30	1	1|1	28	1
1	20563652	T	C	missense_variant	Pkhd1	ENSMUSG00000043760	transcript	ENSMUST00000088448	protein_coding	c.1658A>G	p.His553Arg	1|1	25	1	1|1	13	1	1|1	24	1	1|1	28	1
1	20585717	G	GA	splice_region_variant&intron_variant	Pkhd1	ENSMUSG00000043760	transcript	ENSMUST00000088448	protein_coding	c.597-7dupT		1|1	24	1	1|1	24	1	1|1	24	1	1|1	38	1
1	20613452	A	T	missense_variant	Pkhd1	ENSMUSG00000043760	transcript	ENSMUST00000088448	protein_coding	c.76T>A	p.Phe26Ile	1|1	26	1	1|1	27	1	1|1	25	1	1|1	34	1
1	20814934	G	GGGA	splice_region_variant&intron_variant	Mcm3	ENSMUSG00000041859	transcript	ENSMUST00000053266	protein_coding	c.532-8_532-7insTCC		1|1	12	1	1|1	37	1	1|1	15	1	1|1	25	1
1	20922364	T	C	splice_region_variant	Paqr8	ENSMUSG00000025931	transcript	ENSMUST00000167119	protein_coding	c.-225T>C		1|1	21	1	1|1	28	1	1|1	19	1	1|1	33	1
1	20932234	A	G	5_prime_UTR_premature_start_codon_gain_variant	Paqr8	ENSMUSG00000025931	transcript	ENSMUST00000068880	protein_coding	c.-48A>G		1|1	21	1	1|1	33	1	1|1	20	1	1|1	22	1
1	20934969	A	G	missense_variant	Paqr8	ENSMUSG00000025931	transcript	ENSMUST00000068880	protein_coding	c.346A>G	p.Ile116Val	1|1	15	1	1|1	33	1	1|1	27	1	1|1	30	1
1	20935152	A	C	missense_variant	Paqr8	ENSMUSG00000025931	transcript	ENSMUST00000068880	protein_coding	c.529A>C	p.Ile177Leu	1|1	18	1	1|1	21	1	1|1	27	1	1|1	29	1
1	20935638	A	T	missense_variant	Paqr8	ENSMUSG00000025931	transcript	ENSMUST00000068880	protein_coding	c.1015A>T	p.Thr339Ser	1|1	29	1	1|1	29	1	1|1	20	1	1|1	49	1
1	21285610	A	G	splice_region_variant&non_coding_transcript_exon_variant	Gm4956	ENSMUSG00000025936	transcript	ENSMUST00000178869	transcribed_unprocessed_pseudogene	n.670T>C		1|1	22	1	1|1	19	1	1|1	18	1	1|1	35	1
1	21285738	A	T	splice_region_variant&intron_variant	Gm4956	ENSMUSG00000025936	transcript	ENSMUST00000082032	processed_transcript	n.661-5T>A		1|1	17	1	1|1	18	1	1|1	32	1	1|1	42	1
1	21313446	A	G	splice_region_variant&intron_variant	Gm21909	ENSMUSG00000093963	transcript	ENSMUST00000178260	unprocessed_pseudogene	n.313+6T>C		1|1	25	1	1|1	27	1	1|1	21	1	1|1	36	1
1	21316264	C	T	splice_region_variant&intron_variant	Gm21909	ENSMUSG00000093963	transcript	ENSMUST00000178260	unprocessed_pseudogene	n.49+8G>A		1|1	22	1	1|1	18	1	1|1	20	1	1|1	31	1
1	21350263	C	G	missense_variant	Khdc1a	ENSMUSG00000067750	transcript	ENSMUST00000088407	protein_coding	c.106C>G	p.His36Asp	1|1	26	1	1|1	15	1	1|1	18	1	1|1	30	1
1	21355027	C	T	splice_region_variant&non_coding_transcript_exon_variant	Gm16329	ENSMUSG00000086194	transcript	ENSMUST00000148174	unprocessed_pseudogene	n.282C>T		1|1	23	1	1|1	27	1	1|1	27	1	1|1	30	1
1	23844848	A	T	splice_region_variant&non_coding_transcript_exon_variant	Smap1	ENSMUSG00000026155	transcript	ENSMUST00000149737	processed_transcript	n.1862T>A		1|1	21	1	1|1	24	1	1|1	33	1	1|1	23	1
1	23846568	G	A	splice_region_variant&intron_variant	Smap1	ENSMUSG00000026155	transcript	ENSMUST00000027339	protein_coding	c.1189-5C>T		1|1	24	1	1|1	33	1	1|1	19	1	1|1	28	1
1	24003167	C	G	missense_variant	1110058L19Rik	ENSMUSG00000026154	transcript	ENSMUST00000027338	protein_coding	c.195G>C	p.Glu65Asp	1|1	26	1	1|1	31	1	1|1	47	1	1|1	32	1
1	24005672	C	G	missense_variant	Gm26524	ENSMUSG00000096985	transcript	ENSMUST00000181961	protein_coding	c.166C>G	p.Leu56Val	1|1	30	1	1|1	17	1	1|1	22	1	1|1	35	1
1	24005700	A	T	missense_variant	Gm26524	ENSMUSG00000096985	transcript	ENSMUST00000181961	protein_coding	c.194A>T	p.Glu65Val	1|1	32	1	1|1	19	1	1|1	24	1	1|1	40	1
1	24057231	C	T	missense_variant	Fam135a	ENSMUSG00000026153	transcript	ENSMUST00000027337	protein_coding	c.341G>A	p.Gly114Asp	1|1	23	1	1|1	24	1	1|1	23	1	1|1	19	1
1	24126140	C	T	splice_region_variant&non_coding_transcript_exon_variant	Gm26607	ENSMUSG00000097670	transcript	ENSMUST00000180661	processed_pseudogene	n.866C>T		1|1	19	1	1|1	12	1	1|1	25	1	1|1	26	1
1	24195402	G	A	missense_variant	Col9a1	ENSMUSG00000026147	transcript	ENSMUST00000088349	protein_coding	c.23G>A	p.Arg8Gln	1|1	18	1	1|1	23	1	1|1	22	1	1|1	28	1
1	24214579	A	C	missense_variant	Col9a1	ENSMUSG00000026147	transcript	ENSMUST00000054588	protein_coding	c.1382A>C	p.Asp461Ala	1|1	19	1	1|1	17	1	1|1	41	1	1|1	30	1
1	24221621	G	A	missense_variant	Col9a1	ENSMUSG00000026147	transcript	ENSMUST00000054588	protein_coding	c.1546G>A	p.Glu516Lys	1|1	21	1	1|1	16	1	1|1	20	1	1|1	38	1
1	24223627	T	C	splice_region_variant&intron_variant	Col9a1	ENSMUSG00000026147	transcript	ENSMUST00000054588	protein_coding	c.1764+8T>C		1|1	27	1	1|1	12	1	1|1	21	1	1|1	26	1
1	24231448	T	C	splice_region_variant&intron_variant	Col9a1	ENSMUSG00000026147	transcript	ENSMUST00000054588	protein_coding	c.1999-3T>C		1|1	26	1	1|1	23	1	1|1	28	1	1|1	23	1
1	24237232	T	A	missense_variant	Col9a1	ENSMUSG00000026147	transcript	ENSMUST00000054588	protein_coding	c.2220T>A	p.Asp740Glu	1|1	20	1	1|1	16	1	1|1	14	1	1|1	36	1
1	24239216	C	T	missense_variant	Col9a1	ENSMUSG00000026147	transcript	ENSMUST00000054588	protein_coding	c.2324C>T	p.Ala775Val	1|1	38	1	1|1	25	1	1|1	27	1	1|1	37	1
1	24312463	A	C	missense_variant	Col19a1	ENSMUSG00000026141	transcript	ENSMUST00000115244	protein_coding	c.2151T>G	p.Asp717Glu	1|1	23	1	1|1	22	1	1|1	16	1	1|1	30	1
1	24322208	G	A	splice_region_variant&intron_variant	Col19a1	ENSMUSG00000026141	transcript	ENSMUST00000115244	protein_coding	c.1797+6C>T		1|1	19	1	1|1	21	1	1|1	24	1	1|1	29	1
1	24510872	C	T	missense_variant	Col19a1	ENSMUSG00000026141	transcript	ENSMUST00000115244	protein_coding	c.943G>A	p.Asp315Asn	1|1	28	1	1|1	13	1	1|1	13	1	1|1	30	1
1	24746798	T	C	splice_region_variant&intron_variant	Lmbrd1	ENSMUSG00000073725	transcript	ENSMUST00000095062	protein_coding	c.1180-7T>C		1|1	22	1	1|1	15	1	1|1	17	1	1|1	32	1
1	25224173	C	T	splice_region_variant&non_coding_transcript_exon_variant	Gm15702	ENSMUSG00000080849	transcript	ENSMUST00000119680	processed_pseudogene	n.444C>T		1|1	14	1	1|1	18	1	1|1	15	1	1|1	29	1
1	25830657	A	G	missense_variant	Gm9884	ENSMUSG00000052558	transcript	ENSMUST00000064487	protein_coding	c.1A>G	p.Ile1Val	1|1	17	1	1|1	13	1	1|1	17	1	1|1	23	1
1	26682055	C	G	missense_variant	4931408C20Rik	ENSMUSG00000073722	transcript	ENSMUST00000097801	protein_coding	c.4043G>C	p.Gly1348Ala	1|1	13	1	1|1	23	1	1|1	23	1	1|1	23	1
1	26682068	T	C	missense_variant	4931408C20Rik	ENSMUSG00000073722	transcript	ENSMUST00000097801	protein_coding	c.4030A>G	p.Arg1344Gly	1|1	12	1	1|1	23	1	1|1	22	1	1|1	26	1
1	26682184	C	T	missense_variant	4931408C20Rik	ENSMUSG00000073722	transcript	ENSMUST00000097801	protein_coding	c.3914G>A	p.Cys1305Tyr	1|1	17	1	1|1	20	1	1|1	23	1	1|1	29	1
1	26682262	C	T	missense_variant	4931408C20Rik	ENSMUSG00000073722	transcript	ENSMUST00000097801	protein_coding	c.3836G>A	p.Gly1279Asp	1|1	13	1	1|1	20	1	1|1	21	1	1|1	34	1
1	26682301	G	T	missense_variant	4931408C20Rik	ENSMUSG00000073722	transcript	ENSMUST00000097801	protein_coding	c.3797C>A	p.Thr1266Lys	1|1	19	1	1|1	19	1	1|1	22	1	1|1	37	1
1	26682832	A	G	missense_variant	4931408C20Rik	ENSMUSG00000073722	transcript	ENSMUST00000097801	protein_coding	c.3266T>C	p.Leu1089Pro	1|1	16	1	1|1	26	1	1|1	25	1	1|1	34	1
1	26682847	T	C	missense_variant	4931408C20Rik	ENSMUSG00000073722	transcript	ENSMUST00000097801	protein_coding	c.3251A>G	p.Asp1084Gly	1|1	18	1	1|1	22	1	1|1	25	1	1|1	31	1
1	26682898	TCAA	T	disruptive_inframe_deletion	4931408C20Rik	ENSMUSG00000073722	transcript	ENSMUST00000097801	protein_coding	c.3197_3199delTTG	p.Val1066del	1|1	16	1	1|1	19	1	1|1	23	1	1|1	20	1
1	26682910	T	C	missense_variant	4931408C20Rik	ENSMUSG00000073722	transcript	ENSMUST00000097801	protein_coding	c.3188A>G	p.Glu1063Gly	1|1	20	1	1|1	20	1	1|1	23	1	1|1	20	1
1	26683129	T	A	missense_variant	4931408C20Rik	ENSMUSG00000073722	transcript	ENSMUST00000097801	protein_coding	c.2969A>T	p.Lys990Ile	1|1	26	1	1|1	15	1	1|1	35	1	1|1	27	1
1	26683337	C	G	missense_variant	4931408C20Rik	ENSMUSG00000073722	transcript	ENSMUST00000097801	protein_coding	c.2761G>C	p.Glu921Gln	1|1	22	1	1|1	14	1	1|1	20	1	1|1	30	1
1	26683542	C	A	missense_variant	4931408C20Rik	ENSMUSG00000073722	transcript	ENSMUST00000097801	protein_coding	c.2556G>T	p.Lys852Asn	1|1	21	1	1|1	21	1	1|1	31	1	1|1	28	1
1	26683588	A	C	missense_variant	4931408C20Rik	ENSMUSG00000073722	transcript	ENSMUST00000097801	protein_coding	c.2510T>G	p.Ile837Ser	1|1	25	1	1|1	25	1	1|1	29	1	1|1	22	1
1	26683658	G	T	missense_variant	4931408C20Rik	ENSMUSG00000073722	transcript	ENSMUST00000097801	protein_coding	c.2440C>A	p.Leu814Ile	1|1	27	1	1|1	29	1	1|1	32	1	1|1	26	1
1	26683736	T	C	missense_variant	4931408C20Rik	ENSMUSG00000073722	transcript	ENSMUST00000097801	protein_coding	c.2362A>G	p.Ser788Gly	1|1	24	1	1|1	30	1	1|1	26	1	1|1	27	1
1	26684200	A	G	missense_variant	4931408C20Rik	ENSMUSG00000073722	transcript	ENSMUST00000097801	protein_coding	c.1898T>C	p.Leu633Pro	1|1	20	1	1|1	17	1	1|1	24	1	1|1	27	1
1	26684338	C	G	missense_variant	4931408C20Rik	ENSMUSG00000073722	transcript	ENSMUST00000097801	protein_coding	c.1760G>C	p.Gly587Ala	1|1	11	1	1|1	36	1	1|1	14	1	1|1	27	1
1	26684371	C	G	missense_variant	4931408C20Rik	ENSMUSG00000073722	transcript	ENSMUST00000097801	protein_coding	c.1727G>C	p.Gly576Ala	1|1	10	1	1|1	30	1	1|1	14	1	1|1	28	1
1	26684491	T	C	missense_variant	4931408C20Rik	ENSMUSG00000073722	transcript	ENSMUST00000097801	protein_coding	c.1607A>G	p.Asn536Ser	1|1	18	1	1|1	13	1	1|1	22	1	1|1	14	1
1	26684863	G	T	missense_variant	4931408C20Rik	ENSMUSG00000073722	transcript	ENSMUST00000097801	protein_coding	c.1235C>A	p.Pro412His	1|1	23	1	1|1	20	1	1|1	23	1	1|1	19	1
1	26684941	G	A	missense_variant	4931408C20Rik	ENSMUSG00000073722	transcript	ENSMUST00000097801	protein_coding	c.1157C>T	p.Ala386Val	1|1	21	1	1|1	20	1	1|1	18	1	1|1	18	1
1	26684989	C	G	missense_variant	4931408C20Rik	ENSMUSG00000073722	transcript	ENSMUST00000097801	protein_coding	c.1109G>C	p.Gly370Ala	1|1	23	1	1|1	17	1	1|1	16	1	1|1	21	1
1	26685307	G	T	missense_variant	4931408C20Rik	ENSMUSG00000073722	transcript	ENSMUST00000097801	protein_coding	c.791C>A	p.Thr264Lys	1|1	25	1	1|1	22	1	1|1	27	1	1|1	33	1
1	26685916	C	A	splice_region_variant&intron_variant	4931408C20Rik	ENSMUSG00000073722	transcript	ENSMUST00000097801	protein_coding	c.187-5G>T		1|1	18	1	1|1	22	1	1|1	18	1	1|1	18	1
1	28776317	C	T	missense_variant	Gm597	ENSMUSG00000048411	transcript	ENSMUST00000059937	protein_coding	c.2633G>A	p.Gly878Glu	1|1	20	1	1|1	20	1	1|1	18	1	1|1	38	1
1	28776782	G	C	missense_variant	Gm597	ENSMUSG00000048411	transcript	ENSMUST00000059937	protein_coding	c.2168C>G	p.Thr723Arg	1|1	17	1	1|1	20	1	1|1	23	1	1|1	28	1
1	28777184	A	G	missense_variant	Gm597	ENSMUSG00000048411	transcript	ENSMUST00000059937	protein_coding	c.1766T>C	p.Leu589Pro	1|1	27	1	1|1	23	1	1|1	28	1	1|1	21	1
1	28777286	C	G	missense_variant	Gm597	ENSMUSG00000048411	transcript	ENSMUST00000059937	protein_coding	c.1664G>C	p.Ser555Thr	1|1	23	1	1|1	23	1	1|1	16	1	1|1	25	1
1	28777292	C	T	missense_variant	Gm597	ENSMUSG00000048411	transcript	ENSMUST00000059937	protein_coding	c.1658G>A	p.Cys553Tyr	1|1	22	1	1|1	25	1	1|1	16	1	1|1	26	1
1	28777678	G	T	missense_variant	Gm597	ENSMUSG00000048411	transcript	ENSMUST00000059937	protein_coding	c.1272C>A	p.Asn424Lys	1|1	25	1	1|1	16	1	1|1	31	1	1|1	26	1
1	28778246	C	T	missense_variant	Gm597	ENSMUSG00000048411	transcript	ENSMUST00000059937	protein_coding	c.704G>A	p.Arg235His	1|1	24	1	1|1	21	1	1|1	17	1	1|1	23	1
1	32467893	T	C	splice_region_variant&intron_variant	Khdrbs2	ENSMUSG00000026058	transcript	ENSMUST00000027226	protein_coding	c.611+6T>C		1|1	13	1	1|1	23	1	1|1	15	1	1|1	25	1
1	32545670	G	C	missense_variant	Gm5415	ENSMUSG00000091318	transcript	ENSMUST00000171322	protein_coding	c.1158C>G	p.Ile386Met	1|1	23	1	1|1	12	1	1|1	23	1	1|1	17	1
1	33739273	A	G	missense_variant	Rab23	ENSMUSG00000004768	transcript	ENSMUST00000088287	protein_coding	c.595A>G	p.Arg199Gly	1|1	25	1	1|1	30	1	1|1	27	1	1|1	37	1
1	38996207	C	T	missense_variant	Pdcl3	ENSMUSG00000026078	transcript	ENSMUST00000027247	protein_coding	c.647C>T	p.Pro216Leu	1|1	21	1	1|1	29	1	1|1	18	1	1|1	21	1
1	46362971	T	G	missense_variant	Dnah7b	ENSMUSG00000041144	transcript	ENSMUST00000069293	protein_coding	c.11965T>G	p.Ser3989Ala	0/1	18	0.39	0/1	20	0.25	0/1	23	0.39	0/1	22	0.36
1	51770845	G	A	missense_variant	Myo1b	ENSMUSG00000018417	transcript	ENSMUST00000018561	protein_coding	c.2236C>T	p.Arg746Trp	1|1	28	1	1|1	27	1	1|1	23	1	1|1	26	1
1	51940777	C	T	missense_variant	Gm8420	ENSMUSG00000072324	transcript	ENSMUST00000097103	protein_coding	c.485G>A	p.Arg162His	1|1	11	1	1|1	15	1	1|1	15	1	1|1	8	1
1	51940871	C	CA	frameshift_variant	Gm8420	ENSMUSG00000072324	transcript	ENSMUST00000097103	protein_coding	c.390dupT	p.Glu131fs	1|1	18	1	1|1	21	1	1|1	26	1	1|1	23	1
1	51940876	T	A	missense_variant	Gm8420	ENSMUSG00000072324	transcript	ENSMUST00000097103	protein_coding	c.386A>T	p.Tyr129Phe	1|1	20	1	1|1	22	1	1|1	26	1	1|1	24	1
1	51940921	T	C	missense_variant	Gm8420	ENSMUSG00000072324	transcript	ENSMUST00000097103	protein_coding	c.341A>G	p.Lys114Arg	1|1	26	1	1|1	23	1	1|1	22	1	1|1	25	1
1	51940975	C	T	missense_variant	Gm8420	ENSMUSG00000072324	transcript	ENSMUST00000097103	protein_coding	c.287G>A	p.Arg96Gln	1|1	31	1	1|1	25	1	1|1	22	1	1|1	25	1
1	51941131	T	C	missense_variant	Gm8420	ENSMUSG00000072324	transcript	ENSMUST00000097103	protein_coding	c.131A>G	p.Gln44Arg	1|1	28	1	1|1	25	1	1|1	21	1	1|1	33	1
1	51941132	G	C	missense_variant	Gm8420	ENSMUSG00000072324	transcript	ENSMUST00000097103	protein_coding	c.130C>G	p.Gln44Glu	1|1	28	1	1|1	25	1	1|1	21	1	1|1	33	1
1	51941244	G	GT	frameshift_variant&stop_gained	Gm8420	ENSMUSG00000072324	transcript	ENSMUST00000097103	protein_coding	c.17dupA	p.Tyr6fs	1|1	24	1	1|1	28	1	1|1	21	1	1|1	31	1
1	52490118	G	A	missense_variant	Nab1	ENSMUSG00000002881	transcript	ENSMUST00000069792	protein_coding	c.619C>T	p.Pro207Ser	1|1	15	1	1|1	39	1	1|1	21	1	1|1	26	1
1	52640958	G	A	missense_variant	Tmem194b	ENSMUSG00000043015	transcript	ENSMUST00000165859	protein_coding	c.340G>A	p.Glu114Lys	1|1	24	1	1|1	24	1	1|1	19	1	1|1	42	1
1	52640964	A	G	missense_variant	Tmem194b	ENSMUSG00000043015	transcript	ENSMUST00000165859	protein_coding	c.346A>G	p.Ile116Val	1|1	25	1	1|1	23	1	1|1	20	1	1|1	42	1
1	52789668	T	C	splice_region_variant&non_coding_transcript_exon_variant	Inpp1	ENSMUSG00000026102	transcript	ENSMUST00000177279	nonsense_mediated_decay	n.*797A>G		1|1	28	1	1|1	22	1	1|1	20	1	1|1	37	1
1	52791866	G	A	splice_region_variant&intron_variant	Inpp1	ENSMUSG00000026102	transcript	ENSMUST00000027271	protein_coding	c.467-4C>T		1|1	20	1	1|1	33	1	1|1	20	1	1|1	16	1
1	52794673	G	A	splice_region_variant&intron_variant	Inpp1	ENSMUSG00000026102	transcript	ENSMUST00000027271	protein_coding	c.266-3C>T		1|1	22	1	1|1	34	1	1|1	19	1	1|1	50	1
1	52799461	A	G	missense_variant	Inpp1	ENSMUSG00000026102	transcript	ENSMUST00000027271	protein_coding	c.28T>C	p.Cys10Arg	1|1	26	1	1|1	25	1	1|1	34	1	1|1	25	1
1	52817611	T	A	5_prime_UTR_premature_start_codon_gain_variant	Inpp1	ENSMUSG00000026102	transcript	ENSMUST00000027271	protein_coding	c.-258A>T		1|1	18	1	1|1	22	1	1|1	17	1	1|1	19	1
1	52913714	A	AT	splice_region_variant&intron_variant	Hibch	ENSMUSG00000041426	transcript	ENSMUST00000044478	protein_coding	c.889-9dupT		1|1	28	1	1|1	31	1	1|1	20	1	1|1	32	1
1	53206616	G	A	missense_variant	Pms1	ENSMUSG00000026098	transcript	ENSMUST00000027267	protein_coding	c.1763C>T	p.Ala588Val	1|1	25	1	1|1	28	1	1|1	36	1	1|1	29	1
1	53207220	C	T	missense_variant	Pms1	ENSMUSG00000026098	transcript	ENSMUST00000027267	protein_coding	c.1159G>A	p.Ala387Thr	1|1	26	0.96	1|1	23	1	1|1	28	1	1|1	19	1
1	53479803	G	C	missense_variant	Dnah7a	ENSMUSG00000096141	transcript	ENSMUST00000094964	protein_coding	c.8794C>G	p.Gln2932Glu	1|1	20	1	1|1	22	1	1|1	32	1	1|1	23	1
1	53577336	T	TA	splice_region_variant&intron_variant	Dnah7a	ENSMUSG00000096141	transcript	ENSMUST00000094964	protein_coding	c.3472-8dupT		1|1	22	1	1|1	11	0.91	1|1	23	1	1|1	32	1
1	53623500	A	T	missense_variant	Dnah7a	ENSMUSG00000096141	transcript	ENSMUST00000094964	protein_coding	c.1901T>A	p.Ile634Asn	1|1	25	1	1|1	21	1	1|1	25	1	1|1	29	1
1	53663832	G	A	missense_variant	Dnah7a	ENSMUSG00000096141	transcript	ENSMUST00000094964	protein_coding	c.458C>T	p.Thr153Ile	1|1	29	1	1|1	29	1	1|1	30	1	1|1	39	1
1	53702043	A	G	missense_variant	Dnah7a	ENSMUSG00000096141	transcript	ENSMUST00000094964	protein_coding	c.53T>C	p.Val18Ala	1|1	17	1	1|1	15	1	1|1	18	1	1|1	28	1
1	53764033	T	C	splice_region_variant&synonymous_variant	Stk17b	ENSMUSG00000026094	transcript	ENSMUST00000027263	protein_coding	c.606A>G	p.Leu202Leu	1|1	27	1	1|1	19	1	1|1	32	1	1|1	31	1
1	53776570	A	C	missense_variant	Stk17b	ENSMUSG00000026094	transcript	ENSMUST00000027263	protein_coding	c.69T>G	p.Ile23Met	1|1	24	1	1|1	23	1	1|1	20	1	1|1	43	1
1	53851685	G	A	splice_region_variant&synonymous_variant	Hecw2	ENSMUSG00000042807	transcript	ENSMUST00000087659	protein_coding	c.3670C>T	p.Leu1224Leu	1|1	21	1	1|1	19	1	1|1	19	1	1|1	33	1
1	53851690	T	C	splice_region_variant&intron_variant	Hecw2	ENSMUSG00000042807	transcript	ENSMUST00000087659	protein_coding	c.3669-4A>G		1|1	21	1	1|1	19	1	1|1	19	1	1|1	34	1
1	54557667	T	A	5_prime_UTR_premature_start_codon_gain_variant	Pgap1	ENSMUSG00000073678	transcript	ENSMUST00000097739	protein_coding	c.-87A>T		1|1	17	1	1|1	17	1	1|1	15	1	1|1	30	1
1	54988158	GTAA	G	splice_region_variant&intron_variant	Sf3b1	ENSMUSG00000025982	transcript	ENSMUST00000027127	protein_coding	c.3540-6_3540-4delTTA		1|1	27	1	1|1	16	1	1|1	22	1	1|1	35	1
1	54994468	TA	T	splice_region_variant&intron_variant	Sf3b1	ENSMUSG00000025982	transcript	ENSMUST00000027127	protein_coding	c.3135-8delT		1|1	23	1	1|1	21	1	1|1	20	0.95	1|1	31	0.97
1	55061302	A	G	missense_variant	Coq10b	ENSMUSG00000025981	transcript	ENSMUST00000027125	protein_coding	c.144A>G	p.Ile48Met	1|1	33	1	1|1	16	1	1|1	50	1	1|1	39	1
1	55084793	G	A	splice_region_variant&intron_variant	Hspd1	ENSMUSG00000025980	transcript	ENSMUST00000027123	protein_coding	c.175-8C>T		1|1	25	1	1|1	34	1	1|1	31	1	1|1	34	1
1	55751801	T	A	splice_region_variant	Plcl1	ENSMUSG00000038349	transcript	ENSMUST00000042986	protein_coding	c.*338T>A		1|1	4	1	1|1	5	1	1|1	7	1	1|1	12	1
1	57375250	T	C	splice_region_variant&non_coding_transcript_exon_variant	4930558J18Rik	ENSMUSG00000097519	transcript	ENSMUST00000181949	lincRNA	n.370A>G		1|1	23	1	1|1	26	1	1|1	30	1	1|1	26	1
1	57375523	A	G	splice_region_variant&intron_variant	4930558J18Rik	ENSMUSG00000097519	transcript	ENSMUST00000181949	lincRNA	n.101-4T>C		1|1	23	1	1|1	16	1	1|1	26	1	1|1	31	1
1	57377759	T	C	missense_variant	1700066M21Rik	ENSMUSG00000038323	transcript	ENSMUST00000042734	protein_coding	c.89T>C	p.Leu30Pro	1|1	16	1	1|1	23	1	1|1	15	1	1|1	21	1
1	57383151	C	G	missense_variant	1700066M21Rik	ENSMUSG00000038323	transcript	ENSMUST00000042734	protein_coding	c.685C>G	p.Pro229Ala	1|1	24	1	1|1	23	1	1|1	21	1	1|1	30	1
1	57406448	C	T	missense_variant	Tyw5	ENSMUSG00000048495	transcript	ENSMUST00000162686	protein_coding	c.14G>A	p.Arg5His	1|1	23	1	1|1	21	1	1|1	12	1	1|1	27	1
1	58068732	G	A	splice_region_variant&synonymous_variant	Aox1	ENSMUSG00000063558	transcript	ENSMUST00000001027	protein_coding	c.1872G>A	p.Val624Val	1|1	21	1	1|1	36	1	1|1	29	1	1|1	35	1
1	58081520	C	G	missense_variant	Aox1	ENSMUSG00000063558	transcript	ENSMUST00000001027	protein_coding	c.2571C>G	p.Asp857Glu	1|1	22	1	1|1	24	1	1|1	23	1	1|1	46	1
1	58113227	T	C	5_prime_UTR_premature_start_codon_gain_variant	Aox3	ENSMUSG00000064294	transcript	ENSMUST00000040999	protein_coding	c.-32T>C		1|1	16	1	1|1	25	1	1|1	14	1	1|1	30	1
1	58147290	A	G	splice_region_variant&intron_variant	Aox3	ENSMUSG00000064294	transcript	ENSMUST00000040999	protein_coding	c.1153+3A>G		1|1	25	1	1|1	31	1	1|1	30	1	1|1	26	1
1	58153490	A	G	missense_variant	Aox3	ENSMUSG00000064294	transcript	ENSMUST00000040999	protein_coding	c.1622A>G	p.Lys541Arg	1|1	18	1	1|1	33	1	1|1	30	1	1|1	35	1
1	58188328	A	G	splice_region_variant&intron_variant	Aox3	ENSMUSG00000064294	transcript	ENSMUST00000040999	protein_coding	c.3598-7A>G		1|1	21	1	1|1	33	1	1|1	13	1	1|1	27	1
1	58210499	A	C	5_prime_UTR_premature_start_codon_gain_variant	Aox4	ENSMUSG00000038242	transcript	ENSMUST00000040442	protein_coding	c.-76A>C		1|1	28	1	1|1	18	1	1|1	24	1	1|1	38	1
1	58235194	A	C	missense_variant	Aox4	ENSMUSG00000038242	transcript	ENSMUST00000040442	protein_coding	c.1138A>C	p.Ile380Leu	1|1	16	1	1|1	28	1	1|1	27	1	1|1	30	1
1	58240708	C	A	missense_variant	Aox4	ENSMUSG00000038242	transcript	ENSMUST00000040442	protein_coding	c.1482C>A	p.Asp494Glu	1|1	31	1	1|1	20	1	1|1	19	1	1|1	37	1
1	58245795	T	A	splice_region_variant&intron_variant	Aox4	ENSMUSG00000038242	transcript	ENSMUST00000040442	protein_coding	c.1711-6T>A		1|1	30	1	1|1	26	1	1|1	27	1	1|1	31	1
1	58252062	T	C	splice_region_variant&intron_variant	Aox4	ENSMUSG00000038242	transcript	ENSMUST00000040442	protein_coding	c.2341-3T>C		1|1	18	1	1|1	22	1	1|1	22	1	1|1	32	1
1	58264414	A	G	splice_region_variant&intron_variant	Aox4	ENSMUSG00000038242	transcript	ENSMUST00000040442	protein_coding	c.3603+7A>G		1|1	24	1	1|1	32	1	1|1	39	1	1|1	36	1
1	58265070	A	G	missense_variant	Aox4	ENSMUSG00000038242	transcript	ENSMUST00000040442	protein_coding	c.3715A>G	p.Ile1239Val	1|1	33	1	1|1	28	1	1|1	27	1	1|1	35	1
1	58281172	T	C	splice_region_variant&intron_variant	Aox2	ENSMUSG00000079554	transcript	ENSMUST00000114366	protein_coding	c.58-5T>C		1|1	22	1	1|1	40	1	1|1	27	1	1|1	32	1
1	58292207	A	G	missense_variant	Aox2	ENSMUSG00000079554	transcript	ENSMUST00000114366	protein_coding	c.604A>G	p.Lys202Glu	1|1	24	1	1|1	39	1	1|1	33	1	1|1	25	1
1	58646998	C	T	missense_variant	Gm10068	ENSMUSG00000059647	transcript	ENSMUST00000081455	protein_coding	c.311C>T	p.Ser104Leu	0/1	42	0.19	0/1	34	0.24	0/1	34	0.15	0/1	55	0.16
1	58647007	A	C	missense_variant	Gm10068	ENSMUSG00000059647	transcript	ENSMUST00000081455	protein_coding	c.320A>C	p.Lys107Thr	0/1	44	0.32	0/1	38	0.21	0/1	40	0.28	0/1	64	0.17
1	58647055	CT	C	frameshift_variant	Gm10068	ENSMUSG00000059647	transcript	ENSMUST00000081455	protein_coding	c.369delT	p.Glu124fs	0|1	63	0.19	0|1	45	0.22	0|1	49	0.1	0|1	78	0.14
1	58647060	C	T	stop_gained	Gm10068	ENSMUSG00000059647	transcript	ENSMUST00000081455	protein_coding	c.373C>T	p.Arg125*	0|1	62	0.18	0|1	46	0.24	0|1	50	0.1	0|1	75	0.13
1	58647144	G	C	missense_variant	Gm10068	ENSMUSG00000059647	transcript	ENSMUST00000081455	protein_coding	c.457G>C	p.Ala153Pro	0|1	65	0.25	0|1	39	0.26	0|1	45	0.36	0|1	64	0.16
1	58647165	T	C	missense_variant	Gm10068	ENSMUSG00000059647	transcript	ENSMUST00000081455	protein_coding	c.478T>C	p.Cys160Arg	0|1	62	0.24	0|1	39	0.15	0|1	34	0.41	0|1	41	0.15
1	58824229	C	T	missense_variant	Casp8	ENSMUSG00000026029	transcript	ENSMUST00000027189	protein_coding	c.287C>T	p.Ala96Val	1|1	15	1	1|1	18	1	1|1	26	1	1|1	24	1
1	58910004	T	C	missense_variant	Trak2	ENSMUSG00000026028	transcript	ENSMUST00000027186	protein_coding	c.1636A>G	p.Ser546Gly	1|1	16	1	1|1	29	1	1|1	11	1	1|1	30	1
1	58910240	T	C	missense_variant	Trak2	ENSMUSG00000026028	transcript	ENSMUST00000027186	protein_coding	c.1400A>G	p.Gln467Arg	1|1	26	1	1|1	28	1	1|1	16	1	1|1	29	1
1	59051292	C	CA	splice_region_variant&intron_variant	Als2cr11	ENSMUSG00000072295	transcript	ENSMUST00000097080	protein_coding	c.1312-8dupT		0/1	16	0.75	0/1	15	0.67	0/1	13	0.54	0/1	19	0.75
1	59058708	T	C	missense_variant	Als2cr11	ENSMUSG00000072295	transcript	ENSMUST00000097080	protein_coding	c.1221A>G	p.Ile407Met	1|1	22	1	1|1	17	1	1|1	25	1	1|1	35	1
1	59094608	G	C	missense_variant	Als2cr11	ENSMUSG00000072295	transcript	ENSMUST00000097080	protein_coding	c.253C>G	p.Leu85Val	1|1	24	1	1|1	41	1	1|1	14	1	1|1	39	1
1	59101159	G	T	missense_variant	Tmem237	ENSMUSG00000038079	transcript	ENSMUST00000094917	protein_coding	c.1220C>A	p.Thr407Lys	1|1	30	1	1|1	13	1	1|1	31	1	1|1	34	1
1	59101169	G	A	missense_variant	Tmem237	ENSMUSG00000038079	transcript	ENSMUST00000094917	protein_coding	c.1210C>T	p.His404Tyr	1|1	31	1	1|1	14	1	1|1	29	1	1|1	39	1
1	59119707	G	A	missense_variant	Tmem237	ENSMUSG00000038079	transcript	ENSMUST00000087475	protein_coding	c.29C>T	p.Pro10Leu	1|1	17	1	1|1	26	1	1|1	28	1	1|1	17	1
1	59120103	CGGAGG	C	frameshift_variant	G730003C15Rik	ENSMUSG00000097573	transcript	ENSMUST00000180570	protein_coding	c.271_275delGGAGG	p.Gly91fs	1|1	25	1	1|1	12	1	1|1	11	1	1|1	24	1
1	59120170	G	C	missense_variant	G730003C15Rik	ENSMUSG00000097573	transcript	ENSMUST00000180570	protein_coding	c.337G>C	p.Gly113Arg	1|1	23	1	1|1	15	1	1|1	13	1	1|1	25	1
1	59120234	A	C	missense_variant	G730003C15Rik	ENSMUSG00000097573	transcript	ENSMUST00000180570	protein_coding	c.401A>C	p.Gln134Pro	1|1	22	1	1|1	19	1	1|1	11	1	1|1	26	1
1	59123567	G	A	missense_variant	Mpp4	ENSMUSG00000079550	transcript	ENSMUST00000114275	protein_coding	c.1649C>T	p.Ser550Leu	1|1	15	1	1|1	30	1	1|1	28	1	1|1	21	1
1	59125604	A	G	missense_variant	Mpp4	ENSMUSG00000079550	transcript	ENSMUST00000114275	protein_coding	c.1448T>C	p.Phe483Ser	1|1	15	1	1|1	31	1	1|1	23	1	1|1	37	1
1	59128928	G	A	splice_region_variant&intron_variant	Mpp4	ENSMUSG00000079550	transcript	ENSMUST00000114275	protein_coding	c.1435+4C>T		1|1	29	1	1|1	23	1	1|1	28	1	1|1	27	1
1	59146397	G	A	missense_variant	Mpp4	ENSMUSG00000079550	transcript	ENSMUST00000114275	protein_coding	c.731C>T	p.Thr244Met	1|1	27	1	1|1	34	1	1|1	10	1	1|1	19	1
1	59170467	G	A	missense_variant	Als2	ENSMUSG00000026024	transcript	ENSMUST00000027178	protein_coding	c.4355C>T	p.Ser1452Leu	1|1	25	1	1|1	10	1	1|1	28	1	1|1	33	1
1	59178631	C	T	missense_variant	Als2	ENSMUSG00000026024	transcript	ENSMUST00000027178	protein_coding	c.3887G>A	p.Arg1296His	1|1	11	1	1|1	16	1	1|1	22	1	1|1	33	1
1	59186449	C	A	splice_region_variant&intron_variant	Als2	ENSMUSG00000026024	transcript	ENSMUST00000027178	protein_coding	c.2894+7G>T		1|1	34	1	1|1	27	1	1|1	18	1	1|1	34	1
1	59191608	CTT	C	splice_region_variant&non_coding_transcript_exon_variant	Als2	ENSMUSG00000026024	transcript	ENSMUST00000159166	retained_intron	n.2976_2977delAA		1|1	19	1	1|1	24	1	1|1	17	1	1|1	22	1
1	59211178	A	G	missense_variant	Als2	ENSMUSG00000026024	transcript	ENSMUST00000027178	protein_coding	c.1406T>C	p.Leu469Ser	1|1	27	1	1|1	29	1	1|1	31	1	1|1	35	1
1	59215245	C	T	missense_variant	Als2	ENSMUSG00000026024	transcript	ENSMUST00000027178	protein_coding	c.952G>A	p.Val318Ile	1|1	22	1	1|1	25	1	1|1	30	1	1|1	24	1
1	59217921	T	C	splice_region_variant&intron_variant	Als2	ENSMUSG00000026024	transcript	ENSMUST00000027178	protein_coding	c.175+6A>G		1|1	28	1	1|1	20	1	1|1	21	1	1|1	25	1
1	59257820	C	CAGATCTAAA	disruptive_inframe_insertion	Cdk15	ENSMUSG00000026023	transcript	ENSMUST00000160662	protein_coding	c.140_141insTCTAAAAGA	p.Thr46_Glu47insAspLeuLys	1|1	24	1	1|1	36	1	1|1	15	1	1|1	22	1
1	59280570	A	G	splice_region_variant&synonymous_variant	Cdk15	ENSMUSG00000026023	transcript	ENSMUST00000160662	protein_coding	c.450A>G	p.Ala150Ala	1|1	8	1	1|1	18	1	1|1	7	1	1|1	15	1
1	59310865	G	A	splice_region_variant&intron_variant	Cdk15	ENSMUSG00000026023	transcript	ENSMUST00000160662	protein_coding	c.1009+6G>A		1|1	22	1	1|1	30	1	1|1	35	1	1|1	34	1
1	59706714	A	G	missense_variant	Nop58	ENSMUSG00000026020	transcript	ENSMUST00000027174	protein_coding	c.1153A>G	p.Ile385Val	1|1	20	1	1|1	28	1	1|1	32	1	1|1	31	1
1	59949161	T	G	missense_variant	Fam117b	ENSMUSG00000041040	transcript	ENSMUST00000036540	protein_coding	c.698T>G	p.Ile233Ser	1|1	25	1	1|1	26	1	1|1	39	1	1|1	33	1
1	60010242	C	T	splice_region_variant&intron_variant	Ica1l	ENSMUSG00000026018	transcript	ENSMUST00000027172	protein_coding	c.559-8G>A		1|1	17	1	1|1	19	1	1|1	20	1	1|1	49	1
1	60022572	C	T	splice_region_variant&intron_variant	Ica1l	ENSMUSG00000026018	transcript	ENSMUST00000027172	protein_coding	c.235+6G>A		1|1	19	1	1|1	42	1	1|1	29	1	1|1	40	1
1	60078184	T	C	missense_variant	Wdr12	ENSMUSG00000026019	transcript	ENSMUST00000027173	protein_coding	c.1252A>G	p.Thr418Ala	1|1	23	1	1|1	21	1	1|1	22	1	1|1	48	1
1	60098121	G	A	5_prime_UTR_premature_start_codon_gain_variant	Wdr12	ENSMUSG00000026019	transcript	ENSMUST00000122038	protein_coding	c.-257C>T		1|1	26	1	1|1	19	1	1|1	28	1	1|1	24	1
1	60109225	C	T	missense_variant	Carf	ENSMUSG00000026017	transcript	ENSMUST00000027171	protein_coding	c.79C>T	p.Arg27Trp	1|1	32	1	1|1	26	1	1|1	26	1	1|1	32	1
1	60125143	C	A	splice_region_variant&non_coding_transcript_exon_variant	Carf	ENSMUSG00000026017	transcript	ENSMUST00000130075	nonsense_mediated_decay	n.*60C>A		1|1	28	1	1|1	20	1	1|1	39	1	1|1	35	1
1	60139351	G	A	splice_region_variant&intron_variant	Carf	ENSMUSG00000026017	transcript	ENSMUST00000027171	protein_coding	c.1019+8G>A		1|1	19	1	1|1	21	1	1|1	27	1	1|1	36	1
1	60181614	C	T	5_prime_UTR_premature_start_codon_gain_variant	Nbeal1	ENSMUSG00000073664	transcript	ENSMUST00000035569	protein_coding	c.-90C>T		1|1	27	1	1|1	13	1	1|1	16	1	1|1	24	1
1	60305256	C	CTT	splice_region_variant&intron_variant	Nbeal1	ENSMUSG00000073664	transcript	ENSMUST00000035569	protein_coding	c.6934-9_6934-8dupTT		1|1	18	1	1|1	15	1	1|1	16	1	1|1	32	1
1	60319729	T	C	missense_variant	Nbeal1	ENSMUSG00000073664	transcript	ENSMUST00000035569	protein_coding	c.7577T>C	p.Leu2526Pro	1|1	19	1	1|1	19	1	1|1	38	1	1|1	31	1
1	60329343	A	T	missense_variant	Nbeal1	ENSMUSG00000073664	transcript	ENSMUST00000035569	protein_coding	c.7846A>T	p.Thr2616Ser	1|1	17	1	1|1	18	1	1|1	40	1	1|1	28	1
1	60372581	T	TTTGG	splice_region_variant&intron_variant	Cyp20a1	ENSMUSG00000049439	transcript	ENSMUST00000060608	protein_coding	c.796-7_796-6insGGTT		1|1	17	1	1|1	22	1	1|1	25	1	1|1	31	1
1	60746533	G	A	splice_region_variant&intron_variant	Cd28	ENSMUSG00000026012	transcript	ENSMUST00000027165	protein_coding	c.55+5G>A		1|1	26	1	1|1	13	1	1|1	29	1	1|1	39	1
1	60762963	G	GTTT	splice_region_variant&intron_variant	Cd28	ENSMUSG00000026012	transcript	ENSMUST00000027165	protein_coding	c.56-11_56-9dupTTT		1|1	12	1	1|1	22	1	1|1	22	1	1|1	27	1
1	60801299	C	T	splice_region_variant&non_coding_transcript_exon_variant	2310016D23Rik	ENSMUSG00000085965	transcript	ENSMUST00000130082	lincRNA	n.218C>T		1|1	22	1	1|1	22	1	1|1	20	1	1|1	31	1
1	60977978	G	A	missense_variant	Icos	ENSMUSG00000026009	transcript	ENSMUST00000027162	protein_coding	c.20G>A	p.Arg7His	1|1	26	1	1|1	27	1	1|1	31	1	1|1	37	1
1	61771944	C	T	splice_region_variant&intron_variant	4930448K12Rik	ENSMUSG00000085842	transcript	ENSMUST00000138535	antisense	n.762+5G>A		1|1	25	1	1|1	20	1	1|1	26	1	1|1	26	1
1	63151632	A	G	missense_variant	Ndufs1	ENSMUSG00000025968	transcript	ENSMUST00000027111	protein_coding	c.1472T>C	p.Val491Ala	1|1	23	1	1|1	19	1	1|1	28	1	1|1	31	1
1	68293282	T	C	splice_region_variant&non_coding_transcript_exon_variant	Gm15670	ENSMUSG00000083795	transcript	ENSMUST00000117740	processed_pseudogene	n.445A>G		1|1	17	1	1|1	9	1	1|1	21	1	1|1	21	1
1	69577913	C	T	missense_variant	Ikzf2	ENSMUSG00000025997	transcript	ENSMUST00000027146	protein_coding	c.274G>A	p.Asp92Asn	1|1	29	1	1|1	17	1	1|1	14	1	1|1	39	1
1	74570971	G	A	missense_variant	Zfp142	ENSMUSG00000026135	transcript	ENSMUST00000027315	protein_coding	c.3664C>T	p.Arg1222Cys	1|1	24	1	1|1	24	1	1|1	22	1	1|1	30	1
1	75486756	G	A	missense_variant	Obsl1	ENSMUSG00000026211	transcript	ENSMUST00000113567	protein_coding	c.5291C>T	p.Thr1764Met	1|1	28	1	1|1	49	1	1|1	12	1	1|1	32	1
1	78498665	G	A	missense_variant	BC035947	ENSMUSG00000090486	transcript	ENSMUST00000170511	protein_coding	c.1229C>T	p.Thr410Met	0|1	33	0.09	0|1	37	0.14	0|1	27	0.15	0|1	36	0.25
1	78498674	T	A	missense_variant	BC035947	ENSMUSG00000090486	transcript	ENSMUST00000170511	protein_coding	c.1220A>T	p.Asn407Ile	0|1	34	0.09	0|1	40	0.12	0|1	29	0.14	0|1	37	0.24
1	78498679	T	TG	frameshift_variant	BC035947	ENSMUSG00000090486	transcript	ENSMUST00000170511	protein_coding	c.1214dupC	p.Thr406fs	0|1	33	0.09	0|1	40	0.12	0|1	28	0.14	0|1	37	0.24
1	78498710	G	T	missense_variant	BC035947	ENSMUSG00000090486	transcript	ENSMUST00000170511	protein_coding	c.1184C>A	p.Thr395Asn	0/1	26	0.12	0/1	34	0.15	0/1	24	0.17	0/1	34	0.26
1	78498743	C	T	missense_variant	BC035947	ENSMUSG00000090486	transcript	ENSMUST00000170511	protein_coding	c.1151G>A	p.Gly384Asp	1|1	17	0.94	1|1	31	0.97	1|1	27	0.93	1|1	25	1
1	78499361	G	A	missense_variant	BC035947	ENSMUSG00000090486	transcript	ENSMUST00000170511	protein_coding	c.533C>T	p.Pro178Leu	1|1	42	1	1|1	24	1	1|1	18	1	1|1	31	1
1	78499653	G	A	missense_variant	BC035947	ENSMUSG00000090486	transcript	ENSMUST00000170511	protein_coding	c.241C>T	p.Pro81Ser	1|1	22	1	1|1	34	1	1|1	13	1	1|1	36	1
1	78511226	A	G	splice_region_variant&intron_variant	Mogat1	ENSMUSG00000012187	transcript	ENSMUST00000149732	protein_coding	c.6+5A>G		1|1	15	1	1|1	34	1	1|1	19	1	1|1	23	1
1	78537971	C	T	missense_variant	Mogat1	ENSMUSG00000012187	transcript	ENSMUST00000012331	protein_coding	c.881C>T	p.Thr294Ile	1|1	22	1	1|1	20	1	1|1	23	1	1|1	14	1
1	78665012	G	A	missense_variant	Utp14b	ENSMUSG00000079470	transcript	ENSMUST00000053760	protein_coding	c.626G>A	p.Arg209Gln	1|1	16	1	1|1	16	1	1|1	16	1	1|1	33	1
1	78666149	T	C	missense_variant	Utp14b	ENSMUSG00000079470	transcript	ENSMUST00000053760	protein_coding	c.1763T>C	p.Ile588Thr	1|1	27	1	1|1	34	1	1|1	21	1	1|1	26	1
1	78699749	T	C	splice_region_variant&intron_variant	Acsl3	ENSMUSG00000032883	transcript	ENSMUST00000035779	protein_coding	c.1466-7T>C		1|1	30	1	1|1	36	1	1|1	20	1	1|1	31	1
1	79435347	G	T	missense_variant	Scg2	ENSMUSG00000050711	transcript	ENSMUST00000049972	protein_coding	c.1658C>A	p.Pro553Gln	1|1	9	1	1|1	10	1	1|1	26	1	1|1	32	1
1	79625101	T	C	splice_region_variant&intron_variant	Ap1s3	ENSMUSG00000054702	transcript	ENSMUST00000162342	protein_coding	c.182+6A>G		1|1	17	1	1|1	16	1	1|1	18	1	1|1	27	1
1	79761888	AAAAAAC	A	splice_region_variant&intron_variant	Wdfy1	ENSMUSG00000073643	transcript	ENSMUST00000143368	protein_coding	c.-184-10_-184-5delGTTTTT		1|1	17	1	1|1	21	1	1|1	11	1	1|1	19	1
1	79776115	T	C	5_prime_UTR_premature_start_codon_gain_variant	Wdfy1	ENSMUSG00000073643	transcript	ENSMUST00000143368	protein_coding	c.-340A>G		1|1	29	1	1|1	25	1	1|1	23	1	1|1	26	1
1	79821559	TA	T	splice_region_variant&intron_variant	Serpine2	ENSMUSG00000026249	transcript	ENSMUST00000027467	protein_coding	c.-22-3delT		1|1	25	1	1|1	19	1	1|1	14	1	1|1	16	1
1	80198707	C	CA	splice_region_variant	Fam124b	ENSMUSG00000043230	transcript	ENSMUST00000058748	protein_coding	c.*1202dupT		1|1	30	0.93	1|1	15	0.92	1|1	15	1	1|1	26	1
1	81271649	TA	T	splice_region_variant	Nyap2	ENSMUSG00000054976	transcript	ENSMUST00000068275	protein_coding	c.*2112delA		0/1	17	0.4	0/1	17	0.4	0/1	17	0.29	0/1	24	0.35
1	83022740	G	T	missense_variant	Slc19a3	ENSMUSG00000038496	transcript	ENSMUST00000045560	protein_coding	c.555C>A	p.Phe185Leu	0/1	21	0.71	0/1	22	0.36	0/1	26	0.5	0/1	36	0.39
1	84754419	T	TG	frameshift_variant	Trip12	ENSMUSG00000026219	transcript	ENSMUST00000027421	protein_coding	c.2931dupC	p.Lys978fs	0/1	45	0.27	0/1	38	0.53	0/1	43	0.37	0/1	65	0.38
1	85083117	G	A	splice_region_variant&intron_variant	A530032D15Rik	ENSMUSG00000089844	transcript	ENSMUST00000161724	protein_coding	c.*16-4C>T		0/1	106	0.46	0/1	86	0.5	0/1	89	0.58	0/1	99	0.55
1	85085131	G	A	missense_variant	A530032D15Rik	ENSMUSG00000089844	transcript	ENSMUST00000161724	protein_coding	c.611C>T	p.Ala204Val	0/1	112	0.29	0/1	155	0.2	0/1	121	0.22	0/1	181	0.15
1	85088794	T	A	missense_variant	A530032D15Rik	ENSMUSG00000089844	transcript	ENSMUST00000160792	protein_coding	c.620A>T	p.His207Leu	0/1	42	0.21	0/1	43	0.16	0/1	59	0.24	0/1	60	0.18
1	85089584	A	G	splice_region_variant&intron_variant	A530032D15Rik	ENSMUSG00000089844	transcript	ENSMUST00000161724	protein_coding	c.544-4T>C		0|1	87	0.66	0|1	78	0.65	0|1	63	0.59	0|1	92	0.73
1	85094364	A	G	splice_region_variant&intron_variant	A530032D15Rik	ENSMUSG00000089844	transcript	ENSMUST00000161724	protein_coding	c.368-5T>C		0/1	94	0.12	0/1	117	0.16	0/1	124	0.2	0/1	160	0.18
1	85099620	G	A	missense_variant	A530032D15Rik	ENSMUSG00000089844	transcript	ENSMUST00000161724	protein_coding	c.224C>T	p.Ala75Val	0/1	33	0.33	0|1	13	0.15	0/1	14	0.21	0/1	25	0.12
1	85100312	A	G	missense_variant	Gm10553	ENSMUSG00000073631	transcript	ENSMUST00000097669	protein_coding	c.149A>G	p.Tyr50Cys	0|1	33	0.24	0|1	29	0.28	0/1	34	0.24	0/1	42	0.24
1	85100449	T	C	missense_variant	Gm10553	ENSMUSG00000073631	transcript	ENSMUST00000097669	protein_coding	c.286T>C	p.Ser96Pro	0/1	62	0.61	0/1	76	0.58	0/1	56	0.61	0/1	50	0.6
1	85100567	G	A	stop_gained	A530032D15Rik	ENSMUSG00000089844	transcript	ENSMUST00000161724	protein_coding	c.160C>T	p.Arg54*	0|1	19	0.47	0|1	22	0.32	0/1	29	0.48	0/1	19	0.47
1	85112576	G	C	missense_variant	C130026I21Rik	ENSMUSG00000052477	transcript	ENSMUST00000161267	protein_coding	c.229C>G	p.Leu77Val	0/1	75	0.59	0/1	89	0.71	0/1	94	0.63	0/1	77	0.71
1	85171115	C	T	splice_region_variant&intron_variant	Gm6264	ENSMUSG00000089716	transcript	ENSMUST00000162896	transcribed_unprocessed_pseudogene	n.331-4C>T		0/1	52	0.12	0/1	44	0.16	0/1	58	0.31	0/1	66	0.2
1	85247125	G	C	missense_variant	C130026I21Rik	ENSMUSG00000052477	transcript	ENSMUST00000093506	protein_coding	c.688C>G	p.Pro230Ala	0/1	71	0.28	0/1	91	0.19	0/1	88	0.18	0/1	84	0.26
1	85247131	G	C	missense_variant	C130026I21Rik	ENSMUSG00000052477	transcript	ENSMUST00000093506	protein_coding	c.682C>G	p.Pro228Ala	0/1	70	0.43	0/1	88	0.35	0/1	86	0.36	0/1	84	0.42
1	85254186	A	G	splice_region_variant&intron_variant	C130026I21Rik	ENSMUSG00000052477	transcript	ENSMUST00000093506	protein_coding	c.515-3T>C		0/1	44	0.3	0/1	41	0.17	0/1	37	0.27	0/1	42	0.33
1	85513347	C	T	splice_acceptor_variant&intron_variant	Gm16092	ENSMUSG00000089714	transcript	ENSMUST00000161449	lincRNA	n.192-1G>A		0/1	26	0.23	0/1	17	0.12	0/1	22	0.36	0/1	21	0.19
1	85526716	A	G	splice_donor_variant&intron_variant	Gm7592	ENSMUSG00000090186	transcript	ENSMUST00000159601	transcribed_unprocessed_pseudogene	n.114+1A>G		0/1	34	0.18	0/1	42	0.33	0/1	40	0.15	0/1	38	0.39
1	85586280	C	T	missense_variant	Sp110	ENSMUSG00000070034	transcript	ENSMUST00000093508	protein_coding	c.755G>A	p.Arg252His	0|1	20	0.1	0|1	27	0.15	0|1	23	0.22	0|1	43	0.21
1	85589118	C	G	missense_variant	Sp110	ENSMUSG00000070034	transcript	ENSMUST00000093508	protein_coding	c.657G>C	p.Glu219Asp	0/1	74	0.18	0/1	85	0.21	0/1	87	0.22	0/1	93	0.26
1	85604446	C	T	splice_region_variant&intron_variant	Gm10552	ENSMUSG00000073628	transcript	ENSMUST00000161763	antisense	n.362-6G>A		0/1	129	0.18	0/1	149	0.23	0/1	129	0.23	0/1	156	0.2
1	85610733	T	A	splice_region_variant&intron_variant	Sp140	ENSMUSG00000070031	transcript	ENSMUST00000080204	protein_coding	c.196-6T>A		0/1	121	0.26	0/1	137	0.14	0/1	114	0.13	0/1	135	0.17
1	85615212	C	G	missense_variant	Sp140	ENSMUSG00000070031	transcript	ENSMUST00000080204	protein_coding	c.443C>G	p.Thr148Arg	0|1	47	0.3	0|1	48	0.44	0|1	61	0.49	0|1	56	0.48
1	85630513	G	A	missense_variant	Sp140	ENSMUSG00000070031	transcript	ENSMUST00000080204	protein_coding	c.778G>A	p.Val260Met	0/1	23	0.13	0/1	27	0.15	0/1	23	0.26	0/1	43	0.14
1	85630551	A	T	missense_variant	Sp140	ENSMUSG00000070031	transcript	ENSMUST00000080204	protein_coding	c.816A>T	p.Glu272Asp	0/1	28	0.25	0/1	31	0.29	0/1	21	0.29	0/1	39	0.13
1	85632585	C	G	missense_variant	Sp140	ENSMUSG00000070031	transcript	ENSMUST00000080204	protein_coding	c.937C>G	p.Arg313Gly	0/1	25	0.12	0/1	32	0.13	0/1	31	0.28	0/1	34	0.21
1	85635589	C	A	missense_variant	Sp140	ENSMUSG00000070031	transcript	ENSMUST00000080204	protein_coding	c.1003C>A	p.His335Asn	0/1	25	0.24	0/1	47	0.19	0/1	44	0.36	0/1	52	0.17
1	85635605	A	G	missense_variant&splice_region_variant	Sp140	ENSMUSG00000070031	transcript	ENSMUST00000080204	protein_coding	c.1019A>G	p.Glu340Gly	0/1	23	0.26	0/1	48	0.23	0/1	49	0.33	0/1	60	0.17
1	85643221	A	G	missense_variant	Sp140	ENSMUSG00000070031	transcript	ENSMUST00000080204	protein_coding	c.1381A>G	p.Ser461Gly	0|1	33	0.27	0|1	41	0.22	0|1	28	0.11	0|1	38	0.29
1	88212021	G	A	missense_variant	Ugt1a1	ENSMUSG00000089960	transcript	ENSMUST00000073049	protein_coding	c.20G>A	p.Ser7Asn	0/1	127	0.16	0/1	163	0.12	0/1	122	0.18	0/1	194	0.2
1	88212084	A	T	missense_variant	Ugt1a1	ENSMUSG00000089960	transcript	ENSMUST00000073049	protein_coding	c.83A>T	p.His28Leu	0/1	139	0.13	0/1	172	0.17	0/1	117	0.15	0/1	202	0.2
1	88212093	G	A	missense_variant	Ugt1a1	ENSMUSG00000089960	transcript	ENSMUST00000073049	protein_coding	c.92G>A	p.Arg31Lys	0/1	141	0.84	0/1	170	0.83	0/1	114	0.84	0/1	197	0.8
1	88212141	G	T	missense_variant	Ugt1a1	ENSMUSG00000089960	transcript	ENSMUST00000073049	protein_coding	c.140G>T	p.Gly47Val	0/1	131	0.86	0/1	171	0.8	0/1	110	0.86	0/1	185	0.78
1	88212297	G	A	missense_variant	Ugt1a1	ENSMUSG00000089960	transcript	ENSMUST00000073049	protein_coding	c.296G>A	p.Arg99Gln	0/1	129	0.16	0/1	149	0.19	0/1	115	0.2	0/1	138	0.16
1	88212317	T	C	missense_variant	Ugt1a1	ENSMUSG00000089960	transcript	ENSMUST00000073049	protein_coding	c.316T>C	p.Ser106Pro	0/1	137	0.8	0/1	164	0.86	0/1	120	0.75	0/1	136	0.75
1	88212321	T	G	missense_variant	Ugt1a1	ENSMUSG00000089960	transcript	ENSMUST00000073049	protein_coding	c.320T>G	p.Phe107Cys	0/1	137	0.17	0/1	167	0.2	0/1	118	0.2	0/1	139	0.14
1	88212381	C	T	missense_variant	Ugt1a1	ENSMUSG00000089960	transcript	ENSMUST00000073049	protein_coding	c.380C>T	p.Ala127Val	0/1	115	0.21	0/1	180	0.22	0/1	120	0.17	0/1	138	0.17
1	88212392	C	T	missense_variant	Ugt1a1	ENSMUSG00000089960	transcript	ENSMUST00000073049	protein_coding	c.391C>T	p.His131Tyr	0/1	122	0.87	0/1	181	0.88	0/1	121	0.79	0/1	146	0.79
1	88212465	T	C	missense_variant	Ugt1a1	ENSMUSG00000089960	transcript	ENSMUST00000073049	protein_coding	c.464T>C	p.Phe155Ser	0/1	142	0.23	0/1	177	0.36	0/1	126	0.29	0/1	146	0.24
1	88212528	A	C	missense_variant	Ugt1a1	ENSMUSG00000089960	transcript	ENSMUST00000073049	protein_coding	c.527A>C	p.Lys176Thr	0/1	144	0.88	0/1	174	0.9	0/1	130	0.77	0/1	143	0.8
1	88212536	T	C	missense_variant	Ugt1a1	ENSMUSG00000089960	transcript	ENSMUST00000073049	protein_coding	c.535T>C	p.Cys179Arg	0/1	142	0.17	0/1	182	0.23	0/1	130	0.18	0/1	147	0.2
1	88212549	C	T	missense_variant	Ugt1a1	ENSMUSG00000089960	transcript	ENSMUST00000073049	protein_coding	c.548C>T	p.Ser183Leu	0|1	142	0.87	0|1	181	0.89	0|1	131	0.76	0|1	155	0.79
1	88212555	C	T	missense_variant	Ugt1a1	ENSMUSG00000089960	transcript	ENSMUST00000073049	protein_coding	c.554C>T	p.Ala185Val	0/1	144	0.24	0/1	179	0.21	0/1	126	0.11	0/1	157	0.23
1	88212672	T	G	missense_variant	Ugt1a1	ENSMUSG00000089960	transcript	ENSMUST00000073049	protein_coding	c.671T>G	p.Met224Arg	0/1	134	0.22	0/1	191	0.12	0/1	109	0.17	0/1	197	0.14
1	88212696	A	T	missense_variant	Ugt1a1	ENSMUSG00000089960	transcript	ENSMUST00000073049	protein_coding	c.695A>T	p.Tyr232Phe	0/1	144	0.23	0/1	190	0.31	0/1	124	0.22	0/1	179	0.26
1	88212740	C	A	missense_variant	Ugt1a1	ENSMUSG00000089960	transcript	ENSMUST00000073049	protein_coding	c.739C>A	p.Gln247Lys	0|1	152	0.87	0|1	182	0.9	0|1	133	0.71	0|1	168	0.8
1	88212746	C	T	missense_variant	Ugt1a1	ENSMUSG00000089960	transcript	ENSMUST00000073049	protein_coding	c.745C>T	p.Leu249Phe	0/1	154	0.21	0/1	175	0.19	0/1	126	0.17	0/1	163	0.14
1	88215037	A	G	splice_region_variant&intron_variant	Ugt1a10	ENSMUSG00000090165	transcript	ENSMUST00000113142	protein_coding	c.856-7A>G		0/1	148	0.72	0/1	174	0.71	0/1	135	0.67	0/1	159	0.75
1	88215054	C	T	missense_variant	Ugt1a10	ENSMUSG00000090165	transcript	ENSMUST00000113142	protein_coding	c.866C>T	p.Ala289Val	0/1	145	0.18	0/1	177	0.24	0/1	135	0.13	0/1	173	0.2
1	88215123	C	T	missense_variant	Ugt1a10	ENSMUSG00000090165	transcript	ENSMUST00000113142	protein_coding	c.935C>T	p.Pro312Leu	0/1	162	0.18	0/1	164	0.23	0/1	133	0.17	0/1	166	0.16
1	88215174	C	T	missense_variant&splice_region_variant	Ugt1a10	ENSMUSG00000090165	transcript	ENSMUST00000113142	protein_coding	c.986C>T	p.Thr329Met	0/1	168	0.32	0/1	146	0.25	0/1	151	0.26	0/1	178	0.34
1	88215884	T	A	splice_donor_variant&intron_variant	Ugt1a10	ENSMUSG00000090165	transcript	ENSMUST00000113142	protein_coding	c.1075+2T>A		0/1	162	0.82	0/1	161	0.75	0/1	144	0.78	0/1	193	0.75
1	88216140	C	A	missense_variant&splice_region_variant	Ugt1a10	ENSMUSG00000090165	transcript	ENSMUST00000113142	protein_coding	c.1078C>A	p.His360Asn	0/1	151	0.15	0/1	171	0.14	0/1	149	0.21	0/1	226	0.19
1	88216157	AT	A	frameshift_variant	Ugt1a10	ENSMUSG00000090165	transcript	ENSMUST00000113142	protein_coding	c.1097delT	p.Phe366fs	0|1	140	0.17	0|1	172	0.2	0|1	154	0.17	0|1	206	0.12
1	88216160	CAT	C	frameshift_variant	Ugt1a10	ENSMUSG00000090165	transcript	ENSMUST00000113142	protein_coding	c.1099_1100delAT	p.Ile367fs	0|1	143	0.17	0|1	174	0.2	0|1	156	0.17	0|1	208	0.12
1	88216213	C	T	missense_variant	Ugt1a10	ENSMUSG00000090165	transcript	ENSMUST00000113142	protein_coding	c.1151C>T	p.Pro384Leu	0/1	120	0.67	0/1	169	0.62	0/1	156	0.6	0/1	179	0.65
1	88216254	G	A	missense_variant	Ugt1a10	ENSMUSG00000090165	transcript	ENSMUST00000113142	protein_coding	c.1192G>A	p.Ala398Thr	0/1	120	0.18	0/1	160	0.24	0/1	154	0.17	0/1	173	0.18
1	88216260	C	T	missense_variant	Ugt1a10	ENSMUSG00000090165	transcript	ENSMUST00000113142	protein_coding	c.1198C>T	p.Arg400Cys	0/1	122	0.18	0/1	163	0.14	0/1	152	0.22	0/1	170	0.14
1	88216261	G	A	missense_variant	Ugt1a10	ENSMUSG00000090165	transcript	ENSMUST00000113142	protein_coding	c.1199G>A	p.Arg400His	0/1	123	0.36	0/1	163	0.28	0/1	152	0.23	0/1	169	0.28
1	88216273	G	C	missense_variant	Ugt1a10	ENSMUSG00000090165	transcript	ENSMUST00000113142	protein_coding	c.1211G>C	p.Arg404Pro	0/1	128	0.17	0/1	170	0.19	0/1	139	0.18	0/1	160	0.2
1	88218119	G	T	splice_region_variant&intron_variant	Ugt1a10	ENSMUSG00000090165	transcript	ENSMUST00000113142	protein_coding	c.1296-8G>T		0|1	150	0.19	0|1	168	0.15	0|1	119	0.12	0|1	200	0.21
1	88218126	G	C	splice_acceptor_variant&intron_variant	Ugt1a10	ENSMUSG00000090165	transcript	ENSMUST00000113142	protein_coding	c.1296-1G>C		0|1	148	0.19	0|1	166	0.15	0|1	114	0.11	0|1	193	0.22
1	88218146	C	A	missense_variant	Ugt1a10	ENSMUSG00000090165	transcript	ENSMUST00000113142	protein_coding	c.1315C>A	p.Arg439Ser	0/1	145	0.86	0/1	173	0.77	0/1	107	0.77	0/1	176	0.85
1	88218245	C	T	missense_variant	Ugt1a10	ENSMUSG00000090165	transcript	ENSMUST00000113142	protein_coding	c.1414C>T	p.Arg472Cys	0/1	129	0.41	0/1	151	0.35	0/1	100	0.34	0/1	146	0.36
1	88218249	C	T	missense_variant	Ugt1a10	ENSMUSG00000090165	transcript	ENSMUST00000113142	protein_coding	c.1418C>T	p.Pro473Leu	0|1	136	0.18	0|1	157	0.2	0|1	102	0.17	0|1	148	0.14
1	88218390	G	A	missense_variant	Ugt1a10	ENSMUSG00000090165	transcript	ENSMUST00000113142	protein_coding	c.1559G>A	p.Arg520Gln	0/1	141	0.23	0/1	186	0.13	0/1	138	0.19	0/1	173	0.21
1	88228343	G	A	missense_variant	Mroh2a	ENSMUSG00000079429	transcript	ENSMUST00000061013	protein_coding	c.196G>A	p.Glu66Lys	0/1	138	0.23	0/1	205	0.16	0/1	147	0.24	0/1	186	0.12
1	88228380	C	A	missense_variant	Mroh2a	ENSMUSG00000079429	transcript	ENSMUST00000061013	protein_coding	c.233C>A	p.Ala78Glu	0/1	137	0.21	0/1	185	0.17	0/1	145	0.26	0/1	165	0.1
1	88230644	G	A	missense_variant	Mroh2a	ENSMUSG00000079429	transcript	ENSMUST00000061013	protein_coding	c.412G>A	p.Ala138Thr	0/1	143	0.32	0/1	181	0.35	0/1	143	0.32	0/1	146	0.29
1	88230650	G	A	missense_variant	Mroh2a	ENSMUSG00000079429	transcript	ENSMUST00000061013	protein_coding	c.418G>A	p.Val140Met	0/1	140	0.89	0/1	186	0.82	0/1	145	0.85	0/1	145	0.85
1	88230668	G	A	missense_variant	Mroh2a	ENSMUSG00000079429	transcript	ENSMUST00000061013	protein_coding	c.436G>A	p.Val146Met	0/1	134	0.22	0/1	182	0.18	0/1	137	0.2	0/1	139	0.19
1	88230680	C	T	stop_gained	Mroh2a	ENSMUSG00000079429	transcript	ENSMUST00000061013	protein_coding	c.448C>T	p.Arg150*	0/1	129	0.32	0/1	174	0.34	0/1	132	0.27	0/1	143	0.3
1	88230746	G	A	missense_variant	Mroh2a	ENSMUSG00000079429	transcript	ENSMUST00000061013	protein_coding	c.514G>A	p.Glu172Lys	0/1	130	0.52	0/1	172	0.45	0/1	133	0.51	0/1	148	0.57
1	88232257	GCC	G	frameshift_variant	Mroh2a	ENSMUSG00000079429	transcript	ENSMUST00000061013	protein_coding	c.572_573delCC	p.Pro191fs	0/1	160	0.21	0/1	231	0.16	0/1	153	0.2	0/1	172	0.16
1	88232292	C	T	missense_variant	Mroh2a	ENSMUSG00000079429	transcript	ENSMUST00000061013	protein_coding	c.605C>T	p.Thr202Met	0/1	165	0.21	0/1	223	0.16	0/1	151	0.12	0/1	177	0.11
1	88233340	G	A	missense_variant	Mroh2a	ENSMUSG00000079429	transcript	ENSMUST00000061013	protein_coding	c.679G>A	p.Val227Met	0|1	155	0.24	0|1	209	0.23	0|1	130	0.15	0|1	140	0.22
1	88233428	G	A	missense_variant	Mroh2a	ENSMUSG00000079429	transcript	ENSMUST00000061013	protein_coding	c.767G>A	p.Arg256Gln	0|1	143	0.24	0|1	200	0.24	0|1	113	0.17	0|1	161	0.25
1	88233442	G	T	missense_variant	Mroh2a	ENSMUSG00000079429	transcript	ENSMUST00000061013	protein_coding	c.781G>T	p.Val261Leu	0/1	148	0.37	0/1	205	0.32	0/1	111	0.28	0/1	157	0.3
1	88234120	G	A	missense_variant	Mroh2a	ENSMUSG00000079429	transcript	ENSMUST00000113130	protein_coding	c.926G>A	p.Gly309Asp	0/1	136	0.27	0/1	212	0.38	0/1	110	0.26	0/1	161	0.35
1	88234137	G	A	missense_variant	Mroh2a	ENSMUSG00000079429	transcript	ENSMUST00000113130	protein_coding	c.943G>A	p.Val315Ile	0/1	133	0.2	0/1	214	0.12	0/1	121	0.24	0/1	160	0.19
1	88235214	C	T	stop_gained	Mroh2a	ENSMUSG00000079429	transcript	ENSMUST00000061013	protein_coding	c.1078C>T	p.Gln360*	0/1	145	0.25	0/1	205	0.09	0/1	126	0.19	0/1	169	0.17
1	88235254	G	A	missense_variant	Mroh2a	ENSMUSG00000079429	transcript	ENSMUST00000061013	protein_coding	c.1118G>A	p.Cys373Tyr	0/1	134	0.37	0/1	188	0.27	0/1	126	0.22	0/1	148	0.28
1	88235376	G	A	missense_variant	Mroh2a	ENSMUSG00000079429	transcript	ENSMUST00000061013	protein_coding	c.1136G>A	p.Arg379His	0/1	139	0.18	0/1	189	0.2	0/1	143	0.22	0/1	153	0.16
1	88235442	G	A	missense_variant	Mroh2a	ENSMUSG00000079429	transcript	ENSMUST00000061013	protein_coding	c.1202G>A	p.Arg401His	0/1	138	0.8	0/1	191	0.83	0/1	138	0.84	0/1	159	0.81
1	88236665	T	G	missense_variant	Mroh2a	ENSMUSG00000079429	transcript	ENSMUST00000061013	protein_coding	c.1257T>G	p.Ile419Met	0/1	139	0.8	0/1	182	0.79	0|1	138	0.78	0/1	155	0.82
1	88237491	C	T	stop_gained	Mroh2a	ENSMUSG00000079429	transcript	ENSMUST00000061013	protein_coding	c.1342C>T	p.Arg448*	0/1	146	0.18	0/1	248	0.17	0/1	111	0.25	0/1	150	0.17
1	88237852	G	T	missense_variant	Mroh2a	ENSMUSG00000079429	transcript	ENSMUST00000061013	protein_coding	c.1451G>T	p.Arg484Leu	0/1	168	0.4	0/1	258	0.33	0/1	153	0.3	0/1	175	0.26
1	88238889	T	C	splice_region_variant&intron_variant	Mroh2a	ENSMUSG00000079429	transcript	ENSMUST00000061013	protein_coding	c.1555-5T>C		0/1	104	0.75	0/1	179	0.8	0/1	111	0.71	0/1	139	0.79
1	88239000	G	T	missense_variant	Mroh2a	ENSMUSG00000079429	transcript	ENSMUST00000061013	protein_coding	c.1661G>T	p.Gly554Val	0/1	115	0.17	0/1	215	0.23	0/1	121	0.19	0/1	135	0.16
1	88239006	A	C	missense_variant	Mroh2a	ENSMUSG00000079429	transcript	ENSMUST00000061013	protein_coding	c.1667A>C	p.Asp556Ala	0/1	107	0.4	0/1	216	0.28	0/1	119	0.28	0/1	139	0.34
1	88240149	C	T	missense_variant	Mroh2a	ENSMUSG00000079429	transcript	ENSMUST00000061013	protein_coding	c.1733C>T	p.Ala578Val	0/1	161	0.83	0/1	249	0.81	0/1	143	0.83	0/1	176	0.81
1	88240703	G	A	missense_variant	Mroh2a	ENSMUSG00000079429	transcript	ENSMUST00000061013	protein_coding	c.1768G>A	p.Gly590Arg	0|1	163	0.11	0|1	203	0.19	0|1	134	0.16	0|1	160	0.2
1	88241584	G	A	stop_gained	Mroh2a	ENSMUSG00000079429	transcript	ENSMUST00000061013	protein_coding	c.1980G>A	p.Trp660*	0/1	145	0.28	0/1	174	0.3	0/1	152	0.24	0/1	135	0.36
1	88241618	A	C	missense_variant	Mroh2a	ENSMUSG00000079429	transcript	ENSMUST00000061013	protein_coding	c.2014A>C	p.Ile672Leu	0/1	148	0.24	0/1	190	0.17	0/1	133	0.16	0/1	138	0.11
1	88242417	G	T	missense_variant	Mroh2a	ENSMUSG00000079429	transcript	ENSMUST00000061013	protein_coding	c.2060G>T	p.Arg687Met	0|1	175	0.15	0|1	226	0.16	0|1	130	0.2	0|1	154	0.12
1	88242418	G	T	missense_variant	Mroh2a	ENSMUSG00000079429	transcript	ENSMUST00000061013	protein_coding	c.2061G>T	p.Arg687Ser	0|1	175	0.15	0|1	226	0.16	0/1	129	0.2	0|1	154	0.12
1	88242760	C	T	missense_variant	Mroh2a	ENSMUSG00000079429	transcript	ENSMUST00000061013	protein_coding	c.2258C>T	p.Ser753Leu	0/1	128	0.24	0/1	206	0.39	0/1	132	0.34	0/1	192	0.33
1	88244970	G	T	missense_variant	Mroh2a	ENSMUSG00000079429	transcript	ENSMUST00000061013	protein_coding	c.2469G>T	p.Met823Ile	0/1	144	0.21	0/1	217	0.12	0/1	118	0.17	0/1	178	0.24
1	88245989	T	C	missense_variant&splice_region_variant	Mroh2a	ENSMUSG00000079429	transcript	ENSMUST00000061013	protein_coding	c.2567T>C	p.Val856Ala	0/1	136	0.85	0/1	155	0.79	0/1	148	0.8	0/1	151	0.79
1	88246065	A	G	splice_region_variant&synonymous_variant	Mroh2a	ENSMUSG00000079429	transcript	ENSMUST00000061013	protein_coding	c.2643A>G	p.Leu881Leu	0/1	137	0.88	0/1	176	0.8	0/1	158	0.78	0/1	166	0.75
1	88247140	A	C	missense_variant	Mroh2a	ENSMUSG00000079429	transcript	ENSMUST00000061013	protein_coding	c.2650A>C	p.Met884Leu	0/1	141	0.84	0/1	228	0.82	0/1	145	0.83	0/1	167	0.77
1	88247237	C	T	missense_variant	Mroh2a	ENSMUSG00000079429	transcript	ENSMUST00000061013	protein_coding	c.2747C>T	p.Ser916Phe	0/1	145	0.38	0/1	214	0.51	0/1	125	0.45	0/1	190	0.48
1	88247763	A	G	missense_variant	Mroh2a	ENSMUSG00000079429	transcript	ENSMUST00000061013	protein_coding	c.2770A>G	p.Thr924Ala	0/1	104	0.73	0/1	192	0.79	0/1	113	0.76	0/1	119	0.76
1	88248555	C	A	missense_variant	Mroh2a	ENSMUSG00000079429	transcript	ENSMUST00000061013	protein_coding	c.2854C>A	p.Leu952Met	0/1	115	0.22	0/1	191	0.15	0/1	153	0.26	0/1	153	0.14
1	88248621	C	T	missense_variant	Mroh2a	ENSMUSG00000079429	transcript	ENSMUST00000061013	protein_coding	c.2920C>T	p.Leu974Phe	0/1	119	0.69	0/1	171	0.59	0/1	133	0.65	0/1	156	0.65
1	88249700	T	C	splice_region_variant&intron_variant	Mroh2a	ENSMUSG00000079429	transcript	ENSMUST00000061013	protein_coding	c.2956-3T>C		0/1	125	0.8	0/1	213	0.8	0/1	121	0.82	0/1	149	0.79
1	88249832	G	A	splice_region_variant&intron_variant	Mroh2a	ENSMUSG00000079429	transcript	ENSMUST00000061013	protein_coding	c.3079+6G>A		0/1	141	0.22	0/1	210	0.22	0/1	116	0.21	0/1	191	0.18
1	88250266	A	G	splice_region_variant&synonymous_variant	Mroh2a	ENSMUSG00000079429	transcript	ENSMUST00000061013	protein_coding	c.3081A>G	p.Val1027Val	0|1	118	0.86	0|1	208	0.79	0|1	123	0.78	0|1	162	0.77
1	88250268	G	A	missense_variant	Mroh2a	ENSMUSG00000079429	transcript	ENSMUST00000061013	protein_coding	c.3083G>A	p.Ser1028Asn	0|1	117	0.15	0|1	208	0.21	0|1	124	0.23	0|1	161	0.13
1	88251267	G	T	missense_variant	Mroh2a	ENSMUSG00000079429	transcript	ENSMUST00000061013	protein_coding	c.3221G>T	p.Cys1074Phe	0/1	156	0.81	0/1	181	0.82	0/1	136	0.76	0/1	165	0.75
1	88251385	G	T	missense_variant	Mroh2a	ENSMUSG00000079429	transcript	ENSMUST00000061013	protein_coding	c.3339G>T	p.Glu1113Asp	0/1	164	0.5	0/1	208	0.47	0/1	134	0.49	0/1	175	0.43
1	88252457	C	T	missense_variant	Mroh2a	ENSMUSG00000079429	transcript	ENSMUST00000061013	protein_coding	c.3473C>T	p.Thr1158Ile	0/1	125	0.22	0/1	194	0.24	0/1	129	0.15	0/1	152	0.15
1	88254965	A	T	missense_variant	Mroh2a	ENSMUSG00000079429	transcript	ENSMUST00000061013	protein_coding	c.3614A>T	p.Asn1205Ile	0|1	135	0.2	0|1	200	0.17	0|1	137	0.18	0|1	166	0.13
1	88255539	C	A	missense_variant&splice_region_variant	Mroh2a	ENSMUSG00000079429	transcript	ENSMUST00000061013	protein_coding	c.3872C>A	p.Ser1291Tyr	0/1	162	0.37	0/1	249	0.29	0/1	105	0.33	0/1	196	0.32
1	88255655	C	G	missense_variant	Mroh2a	ENSMUSG00000079429	transcript	ENSMUST00000061013	protein_coding	c.3988C>G	p.Leu1330Val	0/1	155	0.14	0/1	227	0.16	0/1	131	0.24	0/1	184	0.14
1	88256051	C	A	splice_region_variant&intron_variant	Mroh2a	ENSMUSG00000079429	transcript	ENSMUST00000061013	protein_coding	c.4014-6C>A		0/1	129	0.16	0/1	236	0.19	0/1	135	0.26	0/1	167	0.17
1	88256155	C	T	missense_variant	Mroh2a	ENSMUSG00000079429	transcript	ENSMUST00000061013	protein_coding	c.4112C>T	p.Thr1371Met	0/1	144	0.12	0/1	216	0.18	0/1	131	0.27	0/1	167	0.16
1	88256392	T	C	splice_region_variant&intron_variant	Mroh2a	ENSMUSG00000079429	transcript	ENSMUST00000061013	protein_coding	c.4129-8T>C		0/1	131	0.18	0/1	177	0.19	0/1	124	0.21	0/1	161	0.14
1	88256413	C	T	missense_variant	Mroh2a	ENSMUSG00000079429	transcript	ENSMUST00000061013	protein_coding	c.4142C>T	p.Pro1381Leu	0/1	139	0.22	0/1	188	0.1	0/1	128	0.15	0/1	161	0.2
1	88256545	G	A	missense_variant	Mroh2a	ENSMUSG00000079429	transcript	ENSMUST00000061013	protein_coding	c.4274G>A	p.Arg1425Gln	0/1	125	0.15	0/1	183	0.16	0/1	108	0.19	0/1	140	0.22
1	88256705	C	T	stop_gained	Mroh2a	ENSMUSG00000079429	transcript	ENSMUST00000061013	protein_coding	c.4333C>T	p.Gln1445*	0/1	122	0.3	0/1	194	0.27	0/1	107	0.35	0/1	148	0.19
1	88256798	G	A	missense_variant	Mroh2a	ENSMUSG00000079429	transcript	ENSMUST00000061013	protein_coding	c.4426G>A	p.Ala1476Thr	0/1	98	0.31	0/1	173	0.31	0/1	93	0.31	0/1	130	0.32
1	88257802	G	C	missense_variant	Mroh2a	ENSMUSG00000079429	transcript	ENSMUST00000061013	protein_coding	c.4554G>C	p.Glu1518Asp	0|1	149	0.22	0|1	170	0.19	0|1	111	0.18	0|1	179	0.22
1	88257807	A	C	missense_variant	Mroh2a	ENSMUSG00000079429	transcript	ENSMUST00000061013	protein_coding	c.4559A>C	p.Lys1520Thr	0|1	146	0.22	0|1	177	0.19	0|1	111	0.18	0|1	180	0.22
1	88258708	C	T	splice_region_variant&synonymous_variant	Mroh2a	ENSMUSG00000079429	transcript	ENSMUST00000135948	protein_coding	c.234C>T	p.Ser78Ser	0/1	108	0.36	0/1	166	0.33	0/1	120	0.36	0/1	154	0.32
1	88258709	G	A	splice_donor_variant&intron_variant	Mroh2a	ENSMUSG00000079429	transcript	ENSMUST00000135948	protein_coding	c.234+1G>A		0/1	108	0.2	0/1	168	0.16	0/1	119	0.13	0/1	157	0.1
1	88259220	G	A	splice_region_variant&synonymous_variant	Mroh2a	ENSMUSG00000079429	transcript	ENSMUST00000061013	protein_coding	c.4851G>A	p.Ala1617Ala	0/1	90	0.23	0/1	147	0.22	0/1	99	0.15	0/1	129	0.15
1	88259589	C	T	missense_variant	Mroh2a	ENSMUSG00000079429	transcript	ENSMUST00000061013	protein_coding	c.4912C>T	p.Arg1638Cys	0/1	129	0.24	0/1	189	0.21	0/1	116	0.16	0/1	155	0.19
1	88264978	G	A	splice_region_variant	Hjurp	ENSMUSG00000044783	transcript	ENSMUST00000147393	protein_coding	c.*1723C>T		0/1	148	0.16	0/1	213	0.14	0/1	156	0.18	0/1	178	0.2
1	88265185	G	A	missense_variant	Hjurp	ENSMUSG00000044783	transcript	ENSMUST00000054674	protein_coding	c.2000C>T	p.Pro667Leu	0/1	160	0.2	0/1	170	0.16	0/1	97	0.19	0/1	151	0.21
1	88265258	A	G	missense_variant	Hjurp	ENSMUSG00000044783	transcript	ENSMUST00000054674	protein_coding	c.1927T>C	p.Cys643Arg	0/1	161	0.84	0/1	186	0.84	0/1	113	0.81	0/1	153	0.75
1	88265309	C	G	missense_variant	Hjurp	ENSMUSG00000044783	transcript	ENSMUST00000054674	protein_coding	c.1876G>C	p.Ala626Pro	0/1	171	0.39	0/1	199	0.39	0/1	118	0.2	0/1	157	0.28
1	88265570	T	A	missense_variant	Hjurp	ENSMUSG00000044783	transcript	ENSMUST00000054674	protein_coding	c.1615A>T	p.Ser539Cys	0/1	149	0.77	0/1	197	0.82	0/1	109	0.83	0/1	178	0.85
1	88265980	T	G	missense_variant	Hjurp	ENSMUSG00000044783	transcript	ENSMUST00000054674	protein_coding	c.1205A>C	p.Gln402Pro	0/1	133	0.68	0/1	185	0.7	0/1	130	0.62	0/1	182	0.6
1	88266121	G	A	missense_variant	Hjurp	ENSMUSG00000044783	transcript	ENSMUST00000054674	protein_coding	c.1064C>T	p.Ser355Phe	0/1	119	0.24	0/1	178	0.16	0/1	143	0.21	0/1	168	0.21
1	88266241	G	T	missense_variant	Hjurp	ENSMUSG00000044783	transcript	ENSMUST00000054674	protein_coding	c.944C>A	p.Pro315His	0/1	112	0.22	0/1	158	0.2	0/1	101	0.13	0/1	165	0.17
1	88266278	TCTGGGAGGGCTTGCTCCGGGGGCAGTGTGTCCTGTTCTTGTGCAGCCCCTG	T	conservative_inframe_deletion	Hjurp	ENSMUSG00000044783	transcript	ENSMUST00000054674	protein_coding	c.856_906delCAGGGGCTGCACAAGAACAGGACACACTGCCCCCGGAGCAAGCCCTCCCAG	p.Gln286_Gln302del	0/1	120	0.5	0/1	182	0.49	0/1	115	0.58	0/1	199	0.51
1	88266400	G	A	missense_variant	Hjurp	ENSMUSG00000044783	transcript	ENSMUST00000054674	protein_coding	c.785C>T	p.Pro262Leu	0/1	116	0.21	0/1	176	0.13	0/1	128	0.23	0/1	189	0.2
1	88266452	C	T	missense_variant	Hjurp	ENSMUSG00000044783	transcript	ENSMUST00000054674	protein_coding	c.733G>A	p.Asp245Asn	0/1	99	0.26	0/1	173	0.14	0/1	135	0.2	0/1	174	0.17
1	88266524	G	GT	frameshift_variant	Hjurp	ENSMUSG00000044783	transcript	ENSMUST00000054674	protein_coding	c.660dupA	p.Leu221fs	0/1	115	0.19	0/1	188	0.16	0/1	141	0.1	0/1	167	0.22
1	88266561	A	G	missense_variant	Hjurp	ENSMUSG00000044783	transcript	ENSMUST00000127446	protein_coding	c.170T>C	p.Ile57Thr	0/1	122	0.18	0/1	204	0.13	0/1	140	0.21	0/1	178	0.16
1	88266592	C	A	missense_variant	Hjurp	ENSMUSG00000044783	transcript	ENSMUST00000054674	protein_coding	c.593G>T	p.Gly198Val	0/1	118	0.09	0/1	196	0.24	0/1	139	0.21	0/1	171	0.18
1	88269331	T	C	missense_variant	Hjurp	ENSMUSG00000044783	transcript	ENSMUST00000054674	protein_coding	c.437A>G	p.Glu146Gly	0/1	98	0.21	0/1	170	0.22	0/1	110	0.12	0/1	143	0.2
1	88269401	C	T	missense_variant	Hjurp	ENSMUSG00000044783	transcript	ENSMUST00000054674	protein_coding	c.367G>A	p.Gly123Arg	0|1	103	0.28	0|1	177	0.2	0|1	130	0.13	0|1	145	0.1
1	88270269	A	G	missense_variant	Hjurp	ENSMUSG00000044783	transcript	ENSMUST00000054674	protein_coding	c.287T>C	p.Leu96Ser	0/1	78	0.51	0/1	113	0.46	0/1	58	0.57	0/1	106	0.56
1	88270304	A	AAGC	splice_region_variant&intron_variant	Hjurp	ENSMUSG00000044783	transcript	ENSMUST00000054674	protein_coding	c.257-6_257-5insGCT		0/1	65	0.57	0/1	85	0.6	0/1	36	0.39	0/1	77	0.65
1	88272730	A	G	splice_region_variant&synonymous_variant	Hjurp	ENSMUSG00000044783	transcript	ENSMUST00000054674	protein_coding	c.255T>C	p.Gly85Gly	0/1	146	0.81	0/1	136	0.79	0/1	117	0.75	0/1	152	0.79
1	88277220	C	T	splice_region_variant&synonymous_variant	Hjurp	ENSMUSG00000044783	transcript	ENSMUST00000054674	protein_coding	c.162G>A	p.Gln54Gln	0|1	133	0.23	0|1	130	0.22	0|1	124	0.15	0|1	175	0.2
1	88277231	C	T	missense_variant	Hjurp	ENSMUSG00000044783	transcript	ENSMUST00000054674	protein_coding	c.151G>A	p.Glu51Lys	0|1	130	0.23	0|1	124	0.2	0|1	119	0.13	0|1	179	0.2
1	88277245	C	G	missense_variant	Hjurp	ENSMUSG00000044783	transcript	ENSMUST00000054674	protein_coding	c.137G>C	p.Arg46Thr	0|1	127	0.24	0|1	126	0.21	0|1	120	0.12	0|1	179	0.2
1	88277368	G	A	splice_region_variant&intron_variant	Hjurp	ENSMUSG00000044783	transcript	ENSMUST00000054674	protein_coding	c.96+6C>T		0/1	104	0.18	0/1	129	0.2	0/1	105	0.16	0/1	154	0.16
1	88277413	A	T	missense_variant	Hjurp	ENSMUSG00000044783	transcript	ENSMUST00000054674	protein_coding	c.57T>A	p.Ser19Arg	0/1	126	0.8	0/1	127	0.76	0/1	103	0.73	0/1	157	0.74
1	88277422	C	A	missense_variant	Hjurp	ENSMUSG00000044783	transcript	ENSMUST00000054674	protein_coding	c.48G>T	p.Lys16Asn	0/1	128	0.83	0/1	137	0.8	0/1	106	0.81	0/1	164	0.78
1	88277434	A	C	missense_variant	Hjurp	ENSMUSG00000044783	transcript	ENSMUST00000054674	protein_coding	c.36T>G	p.His12Gln	0/1	132	0.2	0/1	135	0.18	0/1	105	0.22	0/1	154	0.16
1	88277442	T	A	missense_variant	Hjurp	ENSMUSG00000044783	transcript	ENSMUST00000054674	protein_coding	c.28A>T	p.Arg10Trp	0/1	136	0.62	0/1	131	0.63	0/1	108	0.6	0/1	152	0.64
1	88277525	A	G	5_prime_UTR_premature_start_codon_gain_variant	Hjurp	ENSMUSG00000044783	transcript	ENSMUST00000054674	protein_coding	c.-56T>C		0|1	131	0.79	0|1	139	0.84	0/1	110	0.84	0|1	149	0.85
1	88277537	C	A	5_prime_UTR_premature_start_codon_gain_variant	Hjurp	ENSMUSG00000044783	transcript	ENSMUST00000054674	protein_coding	c.-68G>T		0/1	129	0.17	0/1	134	0.26	0/1	104	0.13	0/1	144	0.24
1	88303361	T	C	5_prime_UTR_premature_start_codon_gain_variant	Trpm8	ENSMUSG00000036251	transcript	ENSMUST00000113114	protein_coding	c.-368T>C		0|1	125	0.8	0|1	161	0.78	0|1	124	0.85	0|1	128	0.77
1	88303373	G	T	5_prime_UTR_premature_start_codon_gain_variant	Trpm8	ENSMUSG00000036251	transcript	ENSMUST00000113114	protein_coding	c.-356G>T		0|1	120	0.13	0|1	165	0.1	0|1	132	0.13	0|1	138	0.22
1	88304927	C	T	5_prime_UTR_premature_start_codon_gain_variant	Trpm8	ENSMUSG00000036251	transcript	ENSMUST00000113114	protein_coding	c.-288C>T		0|1	165	0.83	0|1	161	0.75	0|1	131	0.85	0|1	187	0.74
1	88304929	T	C	5_prime_UTR_premature_start_codon_gain_variant	Trpm8	ENSMUSG00000036251	transcript	ENSMUST00000113114	protein_coding	c.-286T>C		0|1	165	0.83	0|1	164	0.75	0|1	131	0.86	0|1	190	0.75
1	88307833	A	G	5_prime_UTR_premature_start_codon_gain_variant	Trpm8	ENSMUSG00000036251	transcript	ENSMUST00000113114	protein_coding	c.-75A>G		0/1	122	0.48	0/1	139	0.48	0/1	122	0.43	0/1	138	0.44
1	88503344	TTGGTGCTGC	T	disruptive_inframe_deletion	Glrp1	ENSMUSG00000062310	transcript	ENSMUST00000067625	protein_coding	c.294_302delGCAGCACCA	p.Gln99_Gln101del	1|1	10	1	1|1	12	1	1|1	17	1	1|1	10	1
1	91101173	AC	A	splice_region_variant&intron_variant	Lrrfip1	ENSMUSG00000026305	transcript	ENSMUST00000097649	protein_coding	c.190-8delC		1|1	20	1	1|1	38	1	1|1	37	1	1|1	43	1
1	91115186	G	A	missense_variant	Lrrfip1	ENSMUSG00000026305	transcript	ENSMUST00000097649	protein_coding	c.1312G>A	p.Glu438Lys	1|1	25	1	1|1	43	1	1|1	34	1	1|1	27	1
1	91115247	C	A	missense_variant	Lrrfip1	ENSMUSG00000026305	transcript	ENSMUST00000097649	protein_coding	c.1373C>A	p.Thr458Asn	1|1	20	1	1|1	36	1	1|1	33	1	1|1	23	0.96
1	91115352	C	T	missense_variant	Lrrfip1	ENSMUSG00000026305	transcript	ENSMUST00000097649	protein_coding	c.1478C>T	p.Pro493Leu	1|1	17	1	1|1	37	1	1|1	33	1	1|1	36	1
1	91115366	G	A	missense_variant	Lrrfip1	ENSMUSG00000026305	transcript	ENSMUST00000097649	protein_coding	c.1492G>A	p.Ala498Thr	1|1	16	1	1|1	37	1	1|1	35	1	1|1	41	1
1	91115378	C	G	missense_variant	Lrrfip1	ENSMUSG00000026305	transcript	ENSMUST00000097649	protein_coding	c.1504C>G	p.Pro502Ala	1|1	17	1	1|1	37	1	1|1	32	1	1|1	45	1
1	91115402	G	A	missense_variant	Lrrfip1	ENSMUSG00000026305	transcript	ENSMUST00000097649	protein_coding	c.1528G>A	p.Gly510Ser	1|1	20	1	1|1	40	1	1|1	32	1	1|1	48	1
1	91115879	A	G	missense_variant	Lrrfip1	ENSMUSG00000026305	transcript	ENSMUST00000097649	protein_coding	c.2005A>G	p.Thr669Ala	1|1	17	1	1|1	37	1	1|1	32	1	1|1	41	1
1	91115900	G	C	missense_variant	Lrrfip1	ENSMUSG00000026305	transcript	ENSMUST00000097649	protein_coding	c.2026G>C	p.Glu676Gln	1|1	16	1	1|1	29	1	1|1	28	1	1|1	46	1
1	91115920	A	T	missense_variant	Lrrfip1	ENSMUSG00000026305	transcript	ENSMUST00000097649	protein_coding	c.2046A>T	p.Gln682His	1|1	19	1	1|1	32	1	1|1	30	1	1|1	48	1
1	91115934	C	A	missense_variant	Lrrfip1	ENSMUSG00000026305	transcript	ENSMUST00000097649	protein_coding	c.2060C>A	p.Ala687Glu	1|1	20	1	1|1	30	1	1|1	30	1	1|1	48	1
1	91153115	C	G	missense_variant	Rbm44	ENSMUSG00000070732	transcript	ENSMUST00000094698	protein_coding	c.1024C>G	p.Arg342Gly	1|1	21	1	1|1	23	1	1|1	32	1	1|1	28	1
1	91153385	G	C	missense_variant	Rbm44	ENSMUSG00000070732	transcript	ENSMUST00000094698	protein_coding	c.1294G>C	p.Ala432Pro	1|1	27	1	1|1	39	1	1|1	36	1	1|1	38	1
1	91153394	A	G	missense_variant	Rbm44	ENSMUSG00000070732	transcript	ENSMUST00000094698	protein_coding	c.1303A>G	p.Ile435Val	1|1	28	1	1|1	40	1	1|1	37	1	1|1	37	1
1	91153431	G	C	missense_variant	Rbm44	ENSMUSG00000070732	transcript	ENSMUST00000094698	protein_coding	c.1340G>C	p.Arg447Thr	1|1	31	1	1|1	33	1	1|1	36	1	1|1	32	1
1	91153434	T	C	missense_variant	Rbm44	ENSMUSG00000070732	transcript	ENSMUST00000094698	protein_coding	c.1343T>C	p.Val448Ala	1|1	31	1	1|1	33	1	1|1	36	1	1|1	32	1
1	91153451	A	G	missense_variant	Rbm44	ENSMUSG00000070732	transcript	ENSMUST00000094698	protein_coding	c.1360A>G	p.Ile454Val	1|1	33	1	1|1	34	1	1|1	30	1	1|1	30	1
1	91153473	C	T	missense_variant	Rbm44	ENSMUSG00000070732	transcript	ENSMUST00000094698	protein_coding	c.1382C>T	p.Thr461Ile	1|1	35	1	1|1	34	1	1|1	28	1	1|1	25	1
1	91153502	G	C	missense_variant	Rbm44	ENSMUSG00000070732	transcript	ENSMUST00000094698	protein_coding	c.1411G>C	p.Ala471Pro	1|1	33	1	1|1	33	1	1|1	24	1	1|1	29	1
1	91153924	A	G	missense_variant	Rbm44	ENSMUSG00000070732	transcript	ENSMUST00000094698	protein_coding	c.1600A>G	p.Thr534Ala	1|1	17	1	1|1	30	1	1|1	30	1	1|1	30	1
1	91153945	T	C	missense_variant	Rbm44	ENSMUSG00000070732	transcript	ENSMUST00000094698	protein_coding	c.1621T>C	p.Cys541Arg	1|1	20	1	1|1	27	1	1|1	27	1	1|1	27	1
1	91155431	C	G	missense_variant	Rbm44	ENSMUSG00000070732	transcript	ENSMUST00000094698	protein_coding	c.1675C>G	p.Gln559Glu	1|1	22	1	1|1	35	1	1|1	32	1	1|1	58	1
1	91155452	A	G	missense_variant	Rbm44	ENSMUSG00000070732	transcript	ENSMUST00000094698	protein_coding	c.1696A>G	p.Ile566Val	1|1	18	1	1|1	37	1	1|1	27	1	1|1	59	1
1	91155454	A	G	missense_variant	Rbm44	ENSMUSG00000070732	transcript	ENSMUST00000094698	protein_coding	c.1698A>G	p.Ile566Met	1|1	17	1	1|1	37	1	1|1	27	1	1|1	58	1
1	91162412	G	A	missense_variant	Rbm44	ENSMUSG00000070732	transcript	ENSMUST00000094698	protein_coding	c.2146G>A	p.Asp716Asn	1|1	22	1	1|1	35	1	1|1	26	1	1|1	36	1
1	91162437	A	G	missense_variant	Rbm44	ENSMUSG00000070732	transcript	ENSMUST00000094698	protein_coding	c.2171A>G	p.Asp724Gly	1|1	25	1	1|1	32	1	1|1	30	1	1|1	34	1
1	91164929	A	G	missense_variant	Rbm44	ENSMUSG00000070732	transcript	ENSMUST00000094698	protein_coding	c.2351A>G	p.Glu784Gly	1|1	28	1	1|1	25	1	1|1	25	1	1|1	37	1
1	91167011	T	C	missense_variant	Rbm44	ENSMUSG00000070732	transcript	ENSMUST00000094698	protein_coding	c.2699T>C	p.Ile900Thr	1|1	29	1	1|1	32	1	1|1	22	1	1|1	33	1
1	91309887	T	C	missense_variant	Scly	ENSMUSG00000026307	transcript	ENSMUST00000027532	protein_coding	c.832T>C	p.Trp278Arg	1|1	24	1	1|1	43	1	1|1	12	1	1|1	36	1
1	91317584	A	G	splice_region_variant&intron_variant	Scly	ENSMUSG00000026307	transcript	ENSMUST00000027532	protein_coding	c.970-8A>G		1|1	8	1	1|1	7	1	1|1	11	1	1|1	11	1
1	91387260	A	C	missense_variant	Ilkap	ENSMUSG00000026309	transcript	ENSMUST00000027534	protein_coding	c.380T>G	p.Ile127Ser	0/1	21	0.57	0/1	25	0.72	0/1	30	0.4	0/1	33	0.61
1	91445550	C	G	missense_variant	Per2	ENSMUSG00000055866	transcript	ENSMUST00000069620	protein_coding	c.515G>C	p.Ser172Thr	1|1	30	1	1|1	56	1	1|1	26	1	1|1	35	1
1	91500846	C	T	missense_variant	Traf3ip1	ENSMUSG00000034292	transcript	ENSMUST00000047242	protein_coding	c.428C>T	p.Thr143Met	1|1	22	1	1|1	26	1	1|1	23	1	1|1	27	1
1	91540832	G	A	missense_variant	Asb1	ENSMUSG00000026311	transcript	ENSMUST00000027538	protein_coding	c.20G>A	p.Gly7Asp	1|1	24	1	1|1	35	1	1|1	22	1	1|1	25	1
1	91930104	C	T	missense_variant	Hdac4	ENSMUSG00000073617	transcript	ENSMUST00000097644	protein_coding	c.202G>A	p.Ala68Thr	1|1	23	1	1|1	43	1	1|1	21	1	1|1	34	1
1	91955290	C	T	missense_variant&splice_region_variant	Hdac4	ENSMUSG00000026313	transcript	ENSMUST00000008995	protein_coding	c.2711G>A	p.Arg904Lys	1|1	16	1	1|1	37	1	1|1	26	1	1|1	27	1
1	91975501	C	A	missense_variant	Hdac4	ENSMUSG00000026313	transcript	ENSMUST00000008995	protein_coding	c.1705G>T	p.Ala569Ser	1|1	22	1	1|1	41	1	1|1	20	1	1|1	28	1
1	91990832	CTTATAGACCAACAACCAGAACCGTGACCTTCCAACA	C	splice_donor_variant&splice_region_variant&intron_variant	Gm26720	ENSMUSG00000096941	transcript	ENSMUST00000181260	lincRNA	n.1782+1_1783-5delTTATAGACCAACAACCAGAACCGTGACCTTCCAACA		1|1	21	1	1|1	42	1	1|1	17	1	1|1	34	1
1	91990870	CATGT	C	splice_acceptor_variant&splice_region_variant&intron_variant&non_coding_transcript_exon_variant	Gm26720	ENSMUSG00000096941	transcript	ENSMUST00000181260	lincRNA	n.1783-2_1784delATGT		1|1	21	1	1|1	42	1	1|1	17	1	1|1	34	1
1	91992627	C	G	splice_region_variant&non_coding_transcript_exon_variant	Gm26720	ENSMUSG00000096941	transcript	ENSMUST00000181260	lincRNA	n.3537C>G		1|1	5	1	1|1	13	1	1|1	5	1	1|1	7	1
1	93226620	A	G	missense_variant	E030010N08Rik	ENSMUSG00000084989	transcript	ENSMUST00000138595	protein_coding	c.737A>G	p.Lys246Arg	1|1	26	1	1|1	43	1	1|1	24	1	1|1	37	1
1	93284444	G	A	missense_variant	Sned1	ENSMUSG00000047793	transcript	ENSMUST00000062202	protein_coding	c.3367G>A	p.Val1123Ile	1|1	27	1	1|1	37	1	1|1	21	1	1|1	34	1
1	93285936	T	C	missense_variant	Sned1	ENSMUSG00000047793	transcript	ENSMUST00000062202	protein_coding	c.3730T>C	p.Ser1244Pro	1|1	11	1	1|1	39	1	1|1	18	1	1|1	30	1
1	93304661	C	T	missense_variant	Mterfd2	ENSMUSG00000026273	transcript	ENSMUST00000027492	protein_coding	c.467G>A	p.Ser156Asn	1|1	24	1	1|1	42	1	1|1	26	1	1|1	37	1
1	93304940	T	C	missense_variant	Mterfd2	ENSMUSG00000026273	transcript	ENSMUST00000027492	protein_coding	c.188A>G	p.Tyr63Cys	1|1	19	1	1|1	31	1	1|1	29	1	1|1	42	1
1	93321182	G	A	missense_variant	Pask	ENSMUSG00000026274	transcript	ENSMUST00000027493	protein_coding	c.2495C>T	p.Ala832Val	1|1	33	1	1|1	34	1	1|1	32	1	1|1	39	1
1	93388593	A	G	splice_region_variant&intron_variant	Ano7	ENSMUSG00000034107	transcript	ENSMUST00000058682	protein_coding	c.601-4A>G		1|1	20	1	1|1	23	0.96	1|1	30	1	1|1	25	1
1	93427550	G	A	splice_region_variant&intron_variant	Hdlbp	ENSMUSG00000034088	transcript	ENSMUST00000042498	protein_coding	c.1372+8C>T		1|1	22	1	1|1	27	1	1|1	36	1	1|1	34	1
1	93429488	A	AG	splice_region_variant&intron_variant	Hdlbp	ENSMUSG00000034088	transcript	ENSMUST00000042498	protein_coding	c.1081-4dupC		1|1	24	1	1|1	28	1	1|1	34	1	1|1	28	1
1	93479569	A	C	splice_region_variant&intron_variant	Sept2	ENSMUSG00000026276	transcript	ENSMUST00000150931	protein_coding	c.-23+3A>C		1|1	15	1	1|1	20	1	1|1	27	1	1|1	34	1
1	93501495	GT	G	splice_region_variant&intron_variant	Sept2	ENSMUSG00000026276	transcript	ENSMUST00000027495	protein_coding	c.697-5delT		1|1	22	1	1|1	25	1	1|1	23	1	1|1	36	1
1	93617583	C	T	missense_variant	Farp2	ENSMUSG00000034066	transcript	ENSMUST00000041983	protein_coding	c.2462C>T	p.Pro821Leu	1|1	27	1	1|1	31	1	1|1	26	1	1|1	32	1
1	93685791	C	T	5_prime_UTR_premature_start_codon_gain_variant	Bok	ENSMUSG00000026278	transcript	ENSMUST00000027499	protein_coding	c.-93C>T		1|1	16	1	1|1	40	1	1|1	9	1	1|1	21	1
1	93750629	G	A	missense_variant	Thap4	ENSMUSG00000026279	transcript	ENSMUST00000112905	protein_coding	c.434C>T	p.Pro145Leu	1|1	26	1	1|1	42	1	1|1	37	1	1|1	30	1
1	93780748	T	C	missense_variant	Atg4b	ENSMUSG00000026280	transcript	ENSMUST00000027502	protein_coding	c.569T>C	p.Val190Ala	1|1	28	1	1|1	39	1	1|1	32	1	1|1	31	1
1	93785926	C	A	missense_variant	Atg4b	ENSMUSG00000026280	transcript	ENSMUST00000027502	protein_coding	c.974C>A	p.Thr325Lys	1|1	12	1	1|1	38	1	1|1	18	1	1|1	37	1
1	93816369	C	T	splice_region_variant&intron_variant	Ing5	ENSMUSG00000026283	transcript	ENSMUST00000027505	protein_coding	c.483-6C>T		0/1	28	0.46	0/1	51	0.35	0/1	32	0.31	0/1	29	0.34
1	93939900	T	C	missense_variant	Gm9994	ENSMUSG00000093805	transcript	ENSMUST00000177958	protein_coding	c.274T>C	p.Phe92Leu	1|1	5	1	1|1	6	0.83	1|1	3	1	1|1	13	1
1	93991639	A	G	5_prime_UTR_premature_start_codon_gain_variant	Gm6086	ENSMUSG00000073608	transcript	ENSMUST00000097632	protein_coding	c.-487A>G		1|1	13	1	1|1	25	1	1|1	18	1	1|1	17	1
1	93995962	C	T	5_prime_UTR_premature_start_codon_gain_variant	Gm6086	ENSMUSG00000073608	transcript	ENSMUST00000097632	protein_coding	c.-166C>T		1|1	14	1	1|1	16	1	1|1	9	1	1|1	26	1
1	94009398	G	A	missense_variant	Gm6086	ENSMUSG00000073608	transcript	ENSMUST00000097632	protein_coding	c.1064G>A	p.Gly355Asp	1|1	24	1	1|1	28	1	1|1	19	1	1|1	21	1
1	94009437	C	T	missense_variant	Gm6086	ENSMUSG00000073608	transcript	ENSMUST00000097632	protein_coding	c.1103C>T	p.Ala368Val	1|1	22	1	1|1	23	1	1|1	16	1	1|1	13	1
1	94020608	T	C	5_prime_UTR_premature_start_codon_gain_variant	Neu4	ENSMUSG00000034000	transcript	ENSMUST00000050890	protein_coding	c.-41T>C		1|1	17	1	1|1	30	1	1|1	27	1	1|1	22	1
1	105356415	C	A	5_prime_UTR_premature_start_codon_gain_variant	Rnf152	ENSMUSG00000047496	transcript	ENSMUST00000058688	protein_coding	c.-320G>T		1|1	20	1	1|1	31	1	1|1	11	1	1|1	25	1
1	105557463	T	G	splice_region_variant&synonymous_variant	Pign	ENSMUSG00000056536	transcript	ENSMUST00000070699	protein_coding	c.2370A>C	p.Leu790Leu	1|1	23	1	1|1	12	1	1|1	23	1	1|1	48	1
1	105591614	C	A	splice_region_variant&intron_variant	Pign	ENSMUSG00000056536	transcript	ENSMUST00000070699	protein_coding	c.1574+8G>T		1|1	27	1	1|1	14	1	1|1	15	1	1|1	30	1
1	105646819	A	G	splice_region_variant&intron_variant	Pign	ENSMUSG00000056536	transcript	ENSMUST00000070699	protein_coding	c.806-5T>C		1|1	19	1	1|1	20	1	1|1	15	1	1|1	40	1
1	105653101	C	T	splice_region_variant&intron_variant	Pign	ENSMUSG00000056536	transcript	ENSMUST00000070699	protein_coding	c.549+3G>A		1|1	20	1	1|1	14	1	1|1	22	1	1|1	25	1
1	105656775	C	A	missense_variant	Pign	ENSMUSG00000056536	transcript	ENSMUST00000070699	protein_coding	c.234G>T	p.Met78Ile	1|1	24	1	1|1	25	1	1|1	22	1	1|1	42	1
1	105664352	C	T	missense_variant	2310035C23Rik	ENSMUSG00000026319	transcript	ENSMUST00000086721	protein_coding	c.245C>T	p.Pro82Leu	1|1	16	1	1|1	11	1	1|1	20	1	1|1	20	1
1	106796574	G	A	5_prime_UTR_premature_start_codon_gain_variant	Vps4b	ENSMUSG00000009907	transcript	ENSMUST00000094646	protein_coding	c.-127C>T		1|1	20	1	1|1	14	1	1|1	10	1	1|1	16	1
1	107021317	A	T	splice_region_variant&intron_variant	Gm8080	ENSMUSG00000084228	transcript	ENSMUST00000122046	unprocessed_pseudogene	n.604-6T>A		1|1	13	1	1|1	15	1	1|1	21	1	1|1	29	1
1	107047565	T	G	missense_variant	Serpinb3a	ENSMUSG00000044594	transcript	ENSMUST00000027567	protein_coding	c.511A>C	p.Met171Leu	1|1	35	1	1|1	29	1	1|1	23	1	1|1	26	1
1	107078537	T	A	missense_variant	Serpinb3d	ENSMUSG00000058017	transcript	ENSMUST00000023861	protein_coding	c.820A>T	p.Met274Leu	1|1	30	1	1|1	16	1	1|1	27	1	1|1	42	1
1	107154379	C	G	missense_variant	Serpinb3b	ENSMUSG00000073602	transcript	ENSMUST00000086694	protein_coding	c.1154G>C	p.Cys385Ser	1|1	25	1	1|1	20	1	1|1	16	1	1|1	34	1
1	107155886	T	C	missense_variant	Serpinb3b	ENSMUSG00000073602	transcript	ENSMUST00000086694	protein_coding	c.562A>G	p.Asn188Asp	1|1	25	1	1|1	16	1	1|1	33	1	1|1	18	1
1	107159041	C	T	missense_variant	Serpinb3b	ENSMUSG00000073602	transcript	ENSMUST00000086694	protein_coding	c.199G>A	p.Glu67Lys	1|1	26	1	1|1	25	1	1|1	39	1	1|1	40	1
1	107272789	G	A	missense_variant	Serpinb3c	ENSMUSG00000073601	transcript	ENSMUST00000027565	protein_coding	c.623C>T	p.Pro208Leu	1|1	25	1	1|1	25	1	1|1	30	1	1|1	33	1
1	107273171	A	G	missense_variant	Serpinb3c	ENSMUSG00000073601	transcript	ENSMUST00000027565	protein_coding	c.515T>C	p.Val172Ala	1|1	21	1	1|1	17	1	1|1	16	1	1|1	30	1
1	107274993	T	C	missense_variant	Serpinb3c	ENSMUSG00000073601	transcript	ENSMUST00000027565	protein_coding	c.284A>G	p.Asp95Gly	1|1	29	1	1|1	27	0.93	1|1	26	1	1|1	18	1
1	110065735	C	G	missense_variant	Cdh7	ENSMUSG00000026312	transcript	ENSMUST00000027542	protein_coding	c.919C>G	p.Leu307Val	1|1	18	1	1|1	8	1	1|1	13	1	1|1	29	1
1	110111597	G	T	missense_variant&splice_region_variant	Cdh7	ENSMUSG00000026312	transcript	ENSMUST00000134301	protein_coding	c.425G>T	p.Gly142Val	1|1	22	1	1|1	11	1	1|1	25	1	1|1	40	1
1	110893384	C	A	missense_variant	Cdh19	ENSMUSG00000047216	transcript	ENSMUST00000094626	protein_coding	c.1623G>T	p.Glu541Asp	1|1	18	1	1|1	17	1	1|1	23	1	1|1	26	1
1	111862857	T	C	5_prime_UTR_premature_start_codon_gain_variant	Dsel	ENSMUSG00000038702	transcript	ENSMUST00000035462	protein_coding	c.-54A>G		1|1	16	1	1|1	15	1	1|1	27	1	1|1	31	1
1	115900919	C	CATT	splice_region_variant&intron_variant	Cntnap5a	ENSMUSG00000070695	transcript	ENSMUST00000043725	protein_coding	c.83-9_83-8insTAT		1|1	23	1	1|1	20	1	1|1	19	1	1|1	23	1
1	116454982	C	CT	splice_region_variant&intron_variant	Cntnap5a	ENSMUSG00000070695	transcript	ENSMUST00000043725	protein_coding	c.2993-5dupT		1|1	22	1	1|1	13	1	1|1	22	1	1|1	19	1
1	116455004	C	A	missense_variant	Cntnap5a	ENSMUSG00000070695	transcript	ENSMUST00000043725	protein_coding	c.3004C>A	p.Leu1002Ile	1|1	28	1	1|1	12	1	1|1	22	1	1|1	22	1
1	116455101	T	C	missense_variant	Cntnap5a	ENSMUSG00000070695	transcript	ENSMUST00000043725	protein_coding	c.3101T>C	p.Leu1034Ser	1|1	34	1	1|1	8	1	1|1	21	1	1|1	18	1
1	116455143	C	T	missense_variant	Cntnap5a	ENSMUSG00000070695	transcript	ENSMUST00000043725	protein_coding	c.3143C>T	p.Thr1048Ile	1|1	29	1	1|1	9	1	1|1	23	1	1|1	26	1
1	116455224	G	A	splice_region_variant&intron_variant	Cntnap5a	ENSMUSG00000070695	transcript	ENSMUST00000043725	protein_coding	c.3217+7G>A		1|1	28	1	1|1	18	1	1|1	19	1	1|1	27	1
1	118837480	A	C	missense_variant	Gli2	ENSMUSG00000048402	transcript	ENSMUST00000062483	protein_coding	c.2940T>G	p.Asn980Lys	0/1	27	0.48	0/1	35	0.43	0/1	8	0.75	0/1	26	0.35
1	118868087	C	T	missense_variant	Gli2	ENSMUSG00000048402	transcript	ENSMUST00000062483	protein_coding	c.337G>A	p.Ala113Thr	1|1	23	1	1|1	38	1	1|1	20	1	1|1	34	1
1	119002044	G	T	missense_variant	Gli2	ENSMUSG00000048402	transcript	ENSMUST00000062483	protein_coding	c.132C>A	p.His44Gln	1|1	20	1	1|1	40	1	1|1	16	1	1|1	27	1
1	120031656	T	C	missense_variant	Sctr	ENSMUSG00000026387	transcript	ENSMUST00000072886	protein_coding	c.328T>C	p.Phe110Leu	1|1	25	1	1|1	47	1	1|1	37	1	1|1	31	1
1	120063246	G	T	missense_variant	Sctr	ENSMUSG00000026387	transcript	ENSMUST00000072886	protein_coding	c.1359G>T	p.Glu453Asp	1|1	29	1	1|1	28	1	1|1	33	0.97	1|1	26	1
1	120063257	G	A	missense_variant	Sctr	ENSMUSG00000026387	transcript	ENSMUST00000072886	protein_coding	c.1370G>A	p.Ser457Asn	1|1	29	1	1|1	28	1	1|1	32	1	1|1	26	1
1	120121527	A	G	5_prime_UTR_premature_start_codon_gain_variant	3110009E18Rik	ENSMUSG00000026388	transcript	ENSMUST00000027637	protein_coding	c.-296A>G		1|1	24	1	1|1	35	1	1|1	19	1	1|1	41	1
1	120270227	C	T	missense_variant	Steap3	ENSMUSG00000026389	transcript	ENSMUST00000112643	protein_coding	c.4G>A	p.Ala2Thr	1|1	19	1	1|1	33	1	1|1	13	1	1|1	36	1
1	120272528	T	C	5_prime_UTR_premature_start_codon_gain_variant	Steap3	ENSMUSG00000026389	transcript	ENSMUST00000112643	protein_coding	c.-121A>G		1|1	14	1	1|1	24	1	1|1	30	1	1|1	34	1
1	120474787	A	T	missense_variant&splice_region_variant	Marco	ENSMUSG00000026390	transcript	ENSMUST00000027639	protein_coding	c.1429T>A	p.Ser477Thr	1|1	24	1	1|1	38	1	1|1	37	1	1|1	35	1
1	120477881	A	T	missense_variant	Marco	ENSMUSG00000026390	transcript	ENSMUST00000027639	protein_coding	c.1175T>A	p.Val392Asp	1|1	20	1	1|1	39	1	1|1	13	1	1|1	22	1
1	121456126	C	T	missense_variant	Ccdc93	ENSMUSG00000026339	transcript	ENSMUST00000036025	protein_coding	c.575C>T	p.Pro192Leu	1|1	24	1	1|1	29	1	1|1	20	1	1|1	24	1
1	121461939	T	C	missense_variant	Ccdc93	ENSMUSG00000026339	transcript	ENSMUST00000036025	protein_coding	c.710T>C	p.Val237Ala	1|1	16	1	1|1	38	1	1|1	26	1	1|1	38	1
1	121483290	A	G	missense_variant	Ccdc93	ENSMUSG00000026339	transcript	ENSMUST00000036025	protein_coding	c.1294A>G	p.Ile432Val	1|1	16	1	1|1	43	1	1|1	35	1	1|1	44	1
1	121494388	TC	T	splice_region_variant&intron_variant	Ccdc93	ENSMUSG00000026339	transcript	ENSMUST00000036025	protein_coding	c.1600-3delC		1|1	16	1	1|1	25	1	1|1	33	1	1|1	22	1
1	121527843	A	G	missense_variant	Htr5b	ENSMUSG00000050534	transcript	ENSMUST00000055884	protein_coding	c.347T>C	p.Val116Ala	1|1	9	1	1|1	23	1	1|1	19	1	1|1	32	1
1	121527882	G	A	missense_variant	Htr5b	ENSMUSG00000050534	transcript	ENSMUST00000055884	protein_coding	c.308C>T	p.Ala103Val	1|1	15	1	1|1	25	1	1|1	20	1	1|1	34	1
1	121527999	A	G	missense_variant	Htr5b	ENSMUSG00000050534	transcript	ENSMUST00000055884	protein_coding	c.191T>C	p.Val64Ala	1|1	14	1	1|1	28	1	1|1	23	1	1|1	22	1
1	121528379	G	A	5_prime_UTR_premature_start_codon_gain_variant	Htr5b	ENSMUSG00000050534	transcript	ENSMUST00000055884	protein_coding	c.-190C>T		1|1	25	1	1|1	24	1	1|1	21	1	1|1	35	1
1	121564560	C	A	missense_variant	Ddx18	ENSMUSG00000001674	transcript	ENSMUST00000001724	protein_coding	c.417G>T	p.Glu139Asp	1|1	44	1	1|1	34	1	1|1	21	1	1|1	30	1
1	121566049	G	C	missense_variant	Ddx18	ENSMUSG00000001674	transcript	ENSMUST00000001724	protein_coding	c.205C>G	p.Gln69Glu	1|1	25	1	1|1	28	1	1|1	33	1	1|1	35	1
1	123095425	GCGCGCGCACGCTTGCA	G	splice_region_variant&non_coding_transcript_exon_variant	Gm22610	ENSMUSG00000088912	transcript	ENSMUST00000158287	miRNA	n.44_59delGCGCGCACGCTTGCAC		1|1	9	1	1|1	6	1	1|1	30	1	1|1	17	1
1	123398576	G	A	missense_variant	Dpp10	ENSMUSG00000036815	transcript	ENSMUST00000112606	protein_coding	c.1178C>T	p.Pro393Leu	1|1	40	1	1|1	12	1	1|1	17	1	1|1	37	1
1	123854181	G	C	missense_variant	Dpp10	ENSMUSG00000036815	transcript	ENSMUST00000112606	protein_coding	c.268C>G	p.Pro90Ala	1|1	18	1	1|1	25	1	1|1	17	1	1|1	33	1
1	125872852	C	A	missense_variant	Gpr39	ENSMUSG00000026343	transcript	ENSMUST00000027581	protein_coding	c.1339C>A	p.Pro447Thr	1|1	21	1	1|1	33	1	1|1	43	1	1|1	30	1
1	125910865	G	C	5_prime_UTR_premature_start_codon_gain_variant	Lypd1	ENSMUSG00000026344	transcript	ENSMUST00000159529	protein_coding	c.-441C>G		1|1	21	1	1|1	35	1	1|1	25	1	1|1	26	1
1	125912874	C	T	missense_variant&splice_region_variant	Lypd1	ENSMUSG00000026344	transcript	ENSMUST00000027582	protein_coding	c.55G>A	p.Gly19Arg	1|1	21	1	1|1	27	1	1|1	22	1	1|1	23	1
1	125912875	T	TG	frameshift_variant&splice_region_variant	Lypd1	ENSMUSG00000026344	transcript	ENSMUST00000027582	protein_coding	c.53dupC	p.Gly19fs	1|1	21	1	1|1	27	1	1|1	22	1	1|1	23	1
1	126102667	TAA	T	splice_region_variant&intron_variant	Nckap5	ENSMUSG00000049690	transcript	ENSMUST00000112583	protein_coding	c.691-6_691-5delTT		1|1	30	1	1|1	22	1	1|1	37	1	1|1	21	1
1	126102670	A	T	splice_region_variant&intron_variant	Nckap5	ENSMUSG00000049690	transcript	ENSMUST00000112583	protein_coding	c.691-7T>A		1|1	30	1	1|1	22	1	1|1	37	1	1|1	21	1
1	126110251	TA	T	splice_region_variant&intron_variant	Nckap5	ENSMUSG00000049690	transcript	ENSMUST00000112583	protein_coding	c.652-5delT		1|1	20	1	1|1	31	1	1|1	15	1	1|1	40	1
1	126492557	G	A	5_prime_UTR_premature_start_codon_gain_variant	Nckap5	ENSMUSG00000049690	transcript	ENSMUST00000161954	protein_coding	c.-71C>T		1|1	22	1	1|1	26	1	1|1	14	1	1|1	27	1
1	127446396	C	G	splice_region_variant&intron_variant	Mgat5	ENSMUSG00000036155	transcript	ENSMUST00000038361	protein_coding	c.1527+5C>G		1|1	25	1	1|1	28	1	1|1	21	1	1|1	25	1
1	127479457	T	C	splice_region_variant&intron_variant	Mgat5	ENSMUSG00000036155	transcript	ENSMUST00000038361	protein_coding	c.1867-8T>C		1|1	27	1	1|1	32	1	1|1	26	1	1|1	30	1
1	127500176	C	G	splice_region_variant&intron_variant	Tmem163	ENSMUSG00000026347	transcript	ENSMUST00000160616	protein_coding	c.664+8G>C		1|1	26	1	1|1	36	1	1|1	25	1	1|1	33	1
1	127519448	T	A	splice_region_variant&intron_variant	Tmem163	ENSMUSG00000026347	transcript	ENSMUST00000160616	protein_coding	c.456-7A>T		1|1	16	1	1|1	26	1	1|1	20	1	1|1	24	1
1	127803140	A	G	missense_variant	Ccnt2	ENSMUSG00000026349	transcript	ENSMUST00000027587	protein_coding	c.1753A>G	p.Thr585Ala	1|1	20	1	1|1	12	1	1|1	29	1	1|1	26	1
1	127889267	A	G	missense_variant	Rab3gap1	ENSMUSG00000036104	transcript	ENSMUST00000037649	protein_coding	c.262A>G	p.Arg88Gly	1|1	33	1	1|1	27	1	1|1	24	1	1|1	36	1
1	127943867	T	C	splice_region_variant	Rab3gap1	ENSMUSG00000036104	transcript	ENSMUST00000037649	protein_coding	c.*1257T>C		1|1	21	1	1|1	30	1	1|1	18	1	1|1	19	1
1	127959819	T	C	missense_variant	Zranb3	ENSMUSG00000036086	transcript	ENSMUST00000086614	protein_coding	c.2870A>G	p.His957Arg	1|1	31	1	1|1	15	1	1|1	33	1	1|1	37	1
1	127960096	T	G	missense_variant	Zranb3	ENSMUSG00000036086	transcript	ENSMUST00000086614	protein_coding	c.2593A>C	p.Ile865Leu	1|1	32	1	1|1	25	1	1|1	27	1	1|1	36	1
1	127966341	A	G	splice_region_variant&intron_variant	Zranb3	ENSMUSG00000036086	transcript	ENSMUST00000143389	processed_transcript	n.100-8T>C		1|1	23	1	1|1	38	1	1|1	25	1	1|1	31	1
1	128178871	CT	C	splice_region_variant&intron_variant	R3hdm1	ENSMUSG00000056211	transcript	ENSMUST00000036288	protein_coding	c.699-4delT		1|1	24	1	1|1	19	1	1|1	23	1	1|1	29	1
1	128258983	C	T	missense_variant	Ubxn4	ENSMUSG00000026353	transcript	ENSMUST00000027592	protein_coding	c.485C>T	p.Thr162Ile	1|1	20	1	1|1	24	1	1|1	26	1	1|1	27	1
1	128286453	C	T	splice_region_variant&intron_variant	Lct	ENSMUSG00000026354	transcript	ENSMUST00000073490	protein_coding	c.5578+3G>A		1|1	22	1	1|1	29	1	1|1	26	1	1|1	28	1
1	128327768	T	C	missense_variant	Lct	ENSMUSG00000026354	transcript	ENSMUST00000073490	protein_coding	c.536A>G	p.Lys179Arg	1|1	19	1	1|1	31	1	1|1	16	1	1|1	35	1
1	128334754	CAT	C	splice_region_variant&intron_variant	Mcm6	ENSMUSG00000026355	transcript	ENSMUST00000027601	protein_coding	c.2209+7_2209+8delAT		1|1	31	1	1|1	25	1	1|1	22	1	1|1	38	1
1	128367036	G	C	splice_region_variant&intron_variant	Dars	ENSMUSG00000026356	transcript	ENSMUST00000027602	protein_coding	c.1231-4C>G		1|1	23	1	1|1	21	1	1|1	19	1	1|1	22	1
1	128373930	T	C	splice_region_variant&intron_variant	Dars	ENSMUSG00000026356	transcript	ENSMUST00000027602	protein_coding	c.959+7A>G		1|1	26	1	1|1	26	1	1|1	35	1	1|1	38	1
1	128417208	T	C	missense_variant	Dars	ENSMUSG00000026356	transcript	ENSMUST00000027602	protein_coding	c.10A>G	p.Thr4Ala	1|1	18	1	1|1	34	1	1|1	26	1	1|1	20	1
1	128589277	C	T	missense_variant	Cxcr4	ENSMUSG00000045382	transcript	ENSMUST00000052172	protein_coding	c.646G>A	p.Val216Ile	1|1	11	1	1|1	34	1	1|1	23	1	1|1	26	1
1	130875974	A	G	missense_variant	Faim3	ENSMUSG00000042474	transcript	ENSMUST00000038829	protein_coding	c.514A>G	p.Thr172Ala	1|1	28	1	1|1	27	1	1|1	26	1	1|1	27	1
1	130878269	T	C	missense_variant	Faim3	ENSMUSG00000042474	transcript	ENSMUST00000038829	protein_coding	c.961T>C	p.Ser321Pro	1|1	21	1	1|1	16	1	1|1	19	1	1|1	22	1
1	131056406	G	T	splice_region_variant&intron_variant	Mapkapk2	ENSMUSG00000016528	transcript	ENSMUST00000016672	protein_coding	c.850+8C>A		1|1	22	1	1|1	41	1	1|1	32	1	1|1	24	1
1	131265937	C	A	missense_variant	Ikbke	ENSMUSG00000042349	transcript	ENSMUST00000062108	protein_coding	c.1447G>T	p.Ala483Ser	1|1	29	1	1|1	46	1	1|1	27	1	1|1	48	1
1	131269823	T	C	missense_variant	Ikbke	ENSMUSG00000042349	transcript	ENSMUST00000062108	protein_coding	c.1411A>G	p.Ser471Gly	1|1	19	1	1|1	31	1	1|1	23	1	1|1	28	1
1	131530668	T	C	missense_variant	Fam72a	ENSMUSG00000055184	transcript	ENSMUST00000068613	protein_coding	c.167T>C	p.Ile56Thr	1|1	24	1	1|1	17	1	1|1	21	1	1|1	52	1
1	131538895	C	T	missense_variant	Fam72a	ENSMUSG00000055184	transcript	ENSMUST00000068613	protein_coding	c.416C>T	p.Thr139Met	1|1	31	1	1|1	37	1	1|1	33	1	1|1	31	1
1	131672306	G	T	missense_variant	Ctse	ENSMUSG00000004552	transcript	ENSMUST00000073350	protein_coding	c.891G>T	p.Gln297His	1|1	23	1	1|1	32	1	1|1	34	1	1|1	32	1
1	131674792	A	T	missense_variant	Ctse	ENSMUSG00000004552	transcript	ENSMUST00000073350	protein_coding	c.1041A>T	p.Glu347Asp	1|1	19	1	1|1	32	1	1|1	25	1	1|1	35	1
1	131710679	G	A	missense_variant&splice_region_variant	5430435G22Rik	ENSMUSG00000052688	transcript	ENSMUST00000136247	protein_coding	c.308G>A	p.Arg103Lys	1|1	11	1	1|1	38	1	1|1	18	1	1|1	31	1
1	131758590	C	T	splice_region_variant&intron_variant	Slc26a9	ENSMUSG00000042268	transcript	ENSMUST00000049027	protein_coding	c.1215+6C>T		1|1	20	1	1|1	39	1	1|1	25	1	1|1	32	1
1	131763211	A	G	missense_variant	Slc26a9	ENSMUSG00000042268	transcript	ENSMUST00000049027	protein_coding	c.1726A>G	p.Thr576Ala	1|1	19	1	1|1	36	1	1|1	29	1	1|1	33	1
1	131765876	T	C	splice_region_variant&intron_variant	Slc26a9	ENSMUSG00000042268	transcript	ENSMUST00000049027	protein_coding	c.2111-8T>C		1|1	17	1	1|1	40	1	1|1	28	1	1|1	24	1
1	131872110	A	G	missense_variant	Rab7l1	ENSMUSG00000026433	transcript	ENSMUST00000027693	protein_coding	c.422A>G	p.Gln141Arg	1|1	31	1	1|1	28	1	1|1	25	1	1|1	38	1
1	132484926	A	G	splice_region_variant&intron_variant	Rbbp5	ENSMUSG00000026439	transcript	ENSMUST00000027700	protein_coding	c.218+8A>G		1|1	23	1	1|1	32	1	1|1	21	1	1|1	42	1
1	132516641	G	A	splice_region_variant&intron_variant	Cntn2	ENSMUSG00000053024	transcript	ENSMUST00000086521	protein_coding	c.2738-5C>T		1|1	30	1	1|1	44	1	1|1	34	1	1|1	36	1
1	132814228	C	T	splice_region_variant&non_coding_transcript_exon_variant	Gm22609	ENSMUSG00000088911	transcript	ENSMUST00000158286	snoRNA	n.121G>A		1|1	37	1	1|1	20	1	1|1	25	1	1|1	23	1
1	132991702	G	A	missense_variant	Mdm4	ENSMUSG00000054387	transcript	ENSMUST00000067398	protein_coding	c.1427C>T	p.Ala476Val	1|1	20	1	1|1	20	1	1|1	39	1	1|1	36	1
1	132994495	T	G	splice_region_variant&intron_variant	Mdm4	ENSMUSG00000054387	transcript	ENSMUST00000067398	protein_coding	c.903+8A>C		1|1	17	1	1|1	38	1	1|1	21	1	1|1	45	1
1	133009145	A	T	missense_variant	Mdm4	ENSMUSG00000054387	transcript	ENSMUST00000067398	protein_coding	c.338T>A	p.Ile113Asn	1|1	19	1	1|1	34	1	1|1	28	1	1|1	28	1
1	133018770	T	C	splice_region_variant&intron_variant	Mdm4	ENSMUSG00000054387	transcript	ENSMUST00000067398	protein_coding	c.78+7A>G		1|1	30	1	1|1	13	1	1|1	22	1	1|1	27	1
1	133019434	GA	G	splice_region_variant&intron_variant	Mdm4	ENSMUSG00000054387	transcript	ENSMUST00000067429	protein_coding	c.-108-4delT		1|1	26	1	1|1	27	1	1|1	30	1	1|1	36	1
1	133019437	A	G	splice_region_variant&intron_variant	Mdm4	ENSMUSG00000054387	transcript	ENSMUST00000067429	protein_coding	c.-108-6T>C		1|1	26	1	1|1	27	1	1|1	30	1	1|1	36	1
1	133045880	T	C	5_prime_UTR_premature_start_codon_gain_variant	Pik3c2b	ENSMUSG00000026447	transcript	ENSMUST00000153707	protein_coding	c.-126T>C		1|1	24	1	1|1	36	1	1|1	20	1	1|1	24	1
1	133066610	A	T	missense_variant	Pik3c2b	ENSMUSG00000026447	transcript	ENSMUST00000077730	protein_coding	c.311A>T	p.Asn104Ile	1|1	27	1	1|1	39	1	1|1	23	1	1|1	29	1
1	133098804	A	G	splice_region_variant&intron_variant	Pik3c2b	ENSMUSG00000026447	transcript	ENSMUST00000077730	protein_coding	c.3683+4A>G		1|1	21	1	1|1	29	1	1|1	14	1	1|1	36	1
1	150362518	CTTT	C	splice_region_variant	BC003331	ENSMUSG00000006010	transcript	ENSMUST00000006167	protein_coding	c.*300_*302delAAA		0/1	25	0.48	0/1	12	0.6	0/1	32	0.54	0/1	35	0.42
1	150384490	C	T	missense_variant	BC003331	ENSMUSG00000006010	transcript	ENSMUST00000094477	protein_coding	c.376G>A	p.Asp126Asn	0/1	36	0.17	0/1	24	0.17	0/1	32	0.44	0/1	54	0.41
1	150384507	C	T	missense_variant	BC003331	ENSMUSG00000006010	transcript	ENSMUST00000094477	protein_coding	c.359G>A	p.Ser120Asn	0/1	34	0.18	0/1	25	0.16	0/1	28	0.36	0/1	55	0.38
1	150388569	T	C	missense_variant	BC003331	ENSMUSG00000006010	transcript	ENSMUST00000094477	protein_coding	c.188A>G	p.Lys63Arg	0/1	63	0.25	0/1	23	0.3	0/1	37	0.43	0/1	56	0.48
1	150388589	T	G	missense_variant	BC003331	ENSMUSG00000006010	transcript	ENSMUST00000094477	protein_coding	c.168A>C	p.Lys56Asn	0/1	63	0.29	0/1	22	0.45	0/1	40	0.5	0/1	62	0.5
1	150748232	A	G	missense_variant	Hmcn1	ENSMUSG00000066842	transcript	ENSMUST00000074783	protein_coding	c.3317T>C	p.Leu1106Ser	0/1	18	0.17	0/1	21	0.29	0/1	35	0.17	0/1	34	0.35
1	155724947	C	A	missense_variant	Lhx4	ENSMUSG00000026468	transcript	ENSMUST00000027740	protein_coding	c.91G>T	p.Ala31Ser	0/1	26	0.65	0/1	27	0.56	0/1	36	0.39	0/1	42	0.33
1	155779448	A	C	missense_variant	Qsox1	ENSMUSG00000033684	transcript	ENSMUST00000035325	protein_coding	c.1968T>G	p.Phe656Leu	1|1	22	1	1|1	39	1	1|1	25	1	1|1	30	1
1	155781823	A	G	splice_region_variant&intron_variant	Qsox1	ENSMUSG00000033684	transcript	ENSMUST00000130701	processed_transcript	n.166+8T>C		1|1	25	1	1|1	42	1	1|1	28	1	1|1	26	1
1	155862369	G	A	missense_variant	Cep350	ENSMUSG00000033671	transcript	ENSMUST00000138762	protein_coding	c.7727C>T	p.Pro2576Leu	1|1	27	1	1|1	24	1	1|1	35	1	1|1	29	1
1	155862882	C	T	missense_variant	Cep350	ENSMUSG00000033671	transcript	ENSMUST00000138762	protein_coding	c.7214G>A	p.Arg2405Lys	1|1	16	1	1|1	21	1	1|1	20	1	1|1	27	1
1	155863282	C	G	missense_variant	Cep350	ENSMUSG00000033671	transcript	ENSMUST00000138762	protein_coding	c.6814G>C	p.Gly2272Arg	1|1	23	1	1|1	14	0.93	1|1	26	1	1|1	36	1
1	155863618	GA	G	splice_region_variant&intron_variant	Cep350	ENSMUSG00000033671	transcript	ENSMUST00000138762	protein_coding	c.6485-8delT		1|1	16	1	1|1	13	1	1|1	20	1	1|1	36	1
1	155926508	C	T	missense_variant	Cep350	ENSMUSG00000033671	transcript	ENSMUST00000138762	protein_coding	c.3271G>A	p.Ala1091Thr	1|1	20	1	1|1	16	1	1|1	25	1	1|1	31	1
1	155928211	C	T	missense_variant	Cep350	ENSMUSG00000033671	transcript	ENSMUST00000138762	protein_coding	c.3125G>A	p.Gly1042Asp	1|1	22	1	1|1	20	1	1|1	30	1	1|1	44	1
1	155958681	G	A	missense_variant	Cep350	ENSMUSG00000033671	transcript	ENSMUST00000138762	protein_coding	c.269C>T	p.Thr90Ile	1|1	19	1	1|1	21	1	1|1	26	1	1|1	24	1
1	156020025	T	TAA	splice_region_variant&intron_variant	Tor1aip1	ENSMUSG00000026466	transcript	ENSMUST00000136331	nonsense_mediated_decay	n.779-4_779-3dupTT		1|1	27	1	1|1	26	1	1|1	23	1	1|1	30	1
1	156020029	C	A	splice_region_variant&intron_variant	Tor1aip1	ENSMUSG00000026466	transcript	ENSMUST00000136331	nonsense_mediated_decay	n.779-6G>T		1|1	27	1	1|1	27	1	1|1	23	1	1|1	31	1
1	156022318	C	T	missense_variant	Tor1aip1	ENSMUSG00000026466	transcript	ENSMUST00000097527	protein_coding	c.760G>A	p.Asp254Asn	1|1	26	1	1|1	23	1	1|1	24	1	1|1	36	1
1	156030430	A	G	splice_region_variant&synonymous_variant	Tor1aip1	ENSMUSG00000026466	transcript	ENSMUST00000097527	protein_coding	c.615T>C	p.Asp205Asp	1|1	25	1	1|1	20	1	1|1	22	1	1|1	29	1
1	156034828	A	G	5_prime_UTR_premature_start_codon_gain_variant	Tor1aip1	ENSMUSG00000026466	transcript	ENSMUST00000141878	protein_coding	c.-225T>C		1|1	24	1	1|1	36	1	1|1	24	1	1|1	34	1
1	156035807	C	G	synonymous_variant	Tor1aip1	ENSMUSG00000026466	transcript	ENSMUST00000097527	protein_coding	c.429G>C	p.Thr143Thr	1|1	9	1	1|1	18	1	1|1	20	1	1|1	24	1
1	156036272	A	G	5_prime_UTR_premature_start_codon_gain_variant	Tor1aip2	ENSMUSG00000050565	transcript	ENSMUST00000128941	protein_coding	c.-927A>G		1|1	24	1	1|1	25	1	1|1	16	1	1|1	33	1
1	156061657	A	G	missense_variant	Tor1aip2	ENSMUSG00000050565	transcript	ENSMUST00000060404	protein_coding	c.137A>G	p.Asn46Ser	1|1	32	1	1|1	31	1	1|1	36	1	1|1	27	1
1	156061765	A	G	missense_variant	Tor1aip2	ENSMUSG00000050565	transcript	ENSMUST00000060404	protein_coding	c.245A>G	p.Glu82Gly	1|1	36	1	1|1	35	1	1|1	26	1	1|1	33	1
1	156061876	G	C	missense_variant	Tor1aip2	ENSMUSG00000050565	transcript	ENSMUST00000060404	protein_coding	c.356G>C	p.Gly119Ala	1|1	30	1	1|1	32	1	1|1	21	1	1|1	35	1
1	156061909	G	T	missense_variant	Tor1aip2	ENSMUSG00000050565	transcript	ENSMUST00000060404	protein_coding	c.389G>T	p.Cys130Phe	1|1	26	1	1|1	32	1	1|1	20	1	1|1	27	1
1	156061963	T	C	missense_variant	Tor1aip2	ENSMUSG00000050565	transcript	ENSMUST00000060404	protein_coding	c.443T>C	p.Val148Ala	1|1	19	1	1|1	24	1	1|1	23	1	1|1	24	1
1	156062121	A	G	missense_variant	Tor1aip2	ENSMUSG00000050565	transcript	ENSMUST00000060404	protein_coding	c.601A>G	p.Thr201Ala	1|1	19	1	1|1	39	1	1|1	15	1	1|1	27	1
1	156062134	A	G	missense_variant	Tor1aip2	ENSMUSG00000050565	transcript	ENSMUST00000060404	protein_coding	c.614A>G	p.Asn205Ser	1|1	20	1	1|1	38	1	1|1	14	1	1|1	28	1
1	156065045	G	A	missense_variant	Tor1aip2	ENSMUSG00000050565	transcript	ENSMUST00000060404	protein_coding	c.1096G>A	p.Glu366Lys	1|1	17	1	1|1	24	1	1|1	24	1	1|1	38	1
1	156078970	T	C	missense_variant	Fam163a	ENSMUSG00000015484	transcript	ENSMUST00000015628	protein_coding	c.434A>G	p.Asn145Ser	1|1	22	1	1|1	24	1	1|1	23	1	1|1	35	1
1	156262881	G	C	missense_variant	Tdrd5	ENSMUSG00000060985	transcript	ENSMUST00000121146	protein_coding	c.2594C>G	p.Pro865Arg	1|1	28	1	1|1	26	1	1|1	32	1	1|1	22	1
1	156262976	TA	T	splice_region_variant&intron_variant	Tdrd5	ENSMUSG00000060985	transcript	ENSMUST00000121146	protein_coding	c.2503-5delT		1|1	18	1	1|1	22	1	1|1	24	1	1|1	20	1
1	156263413	G	A	missense_variant	Tdrd5	ENSMUSG00000060985	transcript	ENSMUST00000121146	protein_coding	c.2495C>T	p.Ala832Val	1|1	17	1	1|1	29	1	1|1	22	1	1|1	25	1
1	156267027	A	AT	splice_region_variant&non_coding_transcript_exon_variant	Tdrd5	ENSMUSG00000060985	transcript	ENSMUST00000148277	retained_intron	n.3671dupA		1|1	27	1	1|1	6	1	1|1	7	1	1|1	25	1
1	156267355	C	T	missense_variant	Tdrd5	ENSMUSG00000060985	transcript	ENSMUST00000121146	protein_coding	c.2177G>A	p.Gly726Glu	1|1	30	1	1|1	19	1	1|1	18	1	1|1	35	1
1	156270646	C	T	missense_variant	Tdrd5	ENSMUSG00000060985	transcript	ENSMUST00000121146	protein_coding	c.2080G>A	p.Asp694Asn	1|1	20	1	1|1	28	1	1|1	25	1	1|1	40	1
1	156285523	T	C	missense_variant	Tdrd5	ENSMUSG00000060985	transcript	ENSMUST00000121146	protein_coding	c.1186A>G	p.Thr396Ala	1|1	26	1	1|1	30	1	1|1	20	1	1|1	30	1
1	156294521	A	G	splice_region_variant&intron_variant	Tdrd5	ENSMUSG00000060985	transcript	ENSMUST00000121146	protein_coding	c.820-3T>C		1|1	29	1	1|1	24	1	1|1	29	1	1|1	33	1
1	156301806	T	C	missense_variant	Tdrd5	ENSMUSG00000060985	transcript	ENSMUST00000121146	protein_coding	c.333A>G	p.Ile111Met	1|1	26	1	1|1	35	1	1|1	25	1	1|1	19	1
1	156303654	C	A	5_prime_UTR_premature_start_codon_gain_variant	Tdrd5	ENSMUSG00000060985	transcript	ENSMUST00000121146	protein_coding	c.-348G>T		1|1	17	1	1|1	23	1	1|1	15	1	1|1	18	1
1	156310930	C	G	missense_variant	Nphs2	ENSMUSG00000026602	transcript	ENSMUST00000027896	protein_coding	c.143C>G	p.Thr48Ser	1|1	12	1	1|1	21	1	1|1	21	1	1|1	37	1
1	156310939	C	G	missense_variant	Nphs2	ENSMUSG00000026602	transcript	ENSMUST00000027896	protein_coding	c.152C>G	p.Thr51Arg	1|1	10	1	1|1	21	1	1|1	22	1	1|1	37	1
1	156310970	T	TGCCACCCGAGGGGAGCCCCGAGCTCCAGCC	conservative_inframe_insertion	Nphs2	ENSMUSG00000026602	transcript	ENSMUST00000027896	protein_coding	c.189_190insCGAGGGGAGCCCCGAGCTCCAGCCGCCACC	p.Arg54_Thr63dup	1|1	11	1	1|1	21	1	1|1	18	1	1|1	45	1
1	156318723	C	T	missense_variant	Nphs2	ENSMUSG00000026602	transcript	ENSMUST00000027896	protein_coding	c.493C>T	p.His165Tyr	1|1	24	1	1|1	29	1	1|1	27	1	1|1	24	1
1	156320864	ATTT	A	splice_region_variant&intron_variant	Nphs2	ENSMUSG00000026602	transcript	ENSMUST00000027896	protein_coding	c.541-10_541-8delTTT		1|1	16	1	1|1	15	1	1|1	15	1	1|1	9	1
1	156321092	T	C	splice_region_variant&intron_variant	Nphs2	ENSMUSG00000026602	transcript	ENSMUST00000027896	protein_coding	c.744+5T>C		1|1	19	1	1|1	15	1	1|1	24	1	1|1	36	1
1	156326100	C	T	missense_variant	Nphs2	ENSMUSG00000026602	transcript	ENSMUST00000027896	protein_coding	c.1120C>T	p.Pro374Ser	1|1	30	1	1|1	33	1	1|1	18	1	1|1	31	1
1	156331574	T	C	missense_variant	Axdnd1	ENSMUSG00000026601	transcript	ENSMUST00000178036	protein_coding	c.2848A>G	p.Asn950Asp	1|1	16	1	1|1	18	0.94	1|1	28	1	1|1	24	1
1	156355469	GATGAAGGCAAGTCTTGTTATTTTATTTATTTATTTATTTATTTTTTATTATTATAGTCAACATA	G	splice_region_variant&non_coding_transcript_exon_variant	Axdnd1	ENSMUSG00000026601	transcript	ENSMUST00000179572	processed_transcript	n.701_*23delTATGTTGACTATAATAATAAAAAATAAATAAATAAATAAATAAAATAACAAGACTTGCCTTCAT		1|1	21	1	1|1	16	1	1|1	29	1	1|1	37	1
1	156366388	C	T	missense_variant	Gm2000	ENSMUSG00000078193	transcript	ENSMUST00000102782	protein_coding	c.311C>T	p.Thr104Ile	1|1	4	1	1|1	5	1	1|1	3	1	1|1	11	1
1	156382482	TA	T	splice_region_variant&intron_variant	Axdnd1	ENSMUSG00000026601	transcript	ENSMUST00000178036	protein_coding	c.1222-6delT		1|1	21	1	1|1	21	1	1|1	28	1	1|1	25	1
1	156397526	C	T	missense_variant	Axdnd1	ENSMUSG00000026601	transcript	ENSMUST00000178036	protein_coding	c.646G>A	p.Val216Ile	1|1	14	1	1|1	12	1	1|1	19	1	1|1	16	1
1	156402949	A	T	splice_region_variant&intron_variant	Axdnd1	ENSMUSG00000026601	transcript	ENSMUST00000178036	protein_coding	c.372-4T>A		1|1	20	1	1|1	19	1	1|1	29	1	1|1	19	1
1	156437837	A	C	splice_region_variant&intron_variant	Soat1	ENSMUSG00000026600	transcript	ENSMUST00000051396	protein_coding	c.958-4T>G		1|1	16	1	1|1	20	1	1|1	19	1	1|1	22	1
1	156441366	G	A	missense_variant	Soat1	ENSMUSG00000026600	transcript	ENSMUST00000051396	protein_coding	c.613C>T	p.His205Tyr	1|1	17	1	1|1	22	1	1|1	24	1	1|1	30	1
1	156441519	G	A	splice_region_variant&intron_variant	Soat1	ENSMUSG00000026600	transcript	ENSMUST00000051396	protein_coding	c.468-8C>T		1|1	17	1	1|1	23	1	1|1	20	1	1|1	29	1
1	156442409	T	C	missense_variant	Soat1	ENSMUSG00000026600	transcript	ENSMUST00000051396	protein_coding	c.439A>G	p.Ile147Val	1|1	23	1	1|1	29	1	1|1	20	1	1|1	27	1
1	156458009	G	A	splice_region_variant&intron_variant	Soat1	ENSMUSG00000026600	transcript	ENSMUST00000051396	protein_coding	c.89-5C>T		1|1	36	1	1|1	31	1	1|1	33	1	1|1	26	1
1	156633939	TA	T	splice_region_variant&intron_variant	Abl2	ENSMUSG00000026596	transcript	ENSMUST00000027888	protein_coding	c.1408+4delA		1|1	15	1	1|1	28	1	1|1	16	1	1|1	32	1
1	156642255	A	G	missense_variant	Abl2	ENSMUSG00000026596	transcript	ENSMUST00000027888	protein_coding	c.3088A>G	p.Met1030Val	1|1	15	1	1|1	28	1	1|1	20	1	1|1	25	1
1	156655866	A	G	missense_variant	Tor3a	ENSMUSG00000060519	transcript	ENSMUST00000079625	protein_coding	c.985T>C	p.Cys329Arg	1|1	17	1	1|1	35	1	1|1	21	1	1|1	34	1
1	156669484	A	C	missense_variant	Tor3a	ENSMUSG00000060519	transcript	ENSMUST00000079625	protein_coding	c.490T>G	p.Leu164Val	1|1	25	1	1|1	34	1	1|1	24	1	1|1	42	1
1	156669619	G	A	missense_variant	Tor3a	ENSMUSG00000060519	transcript	ENSMUST00000079625	protein_coding	c.355C>T	p.Arg119Cys	1|1	24	1	1|1	27	1	1|1	28	1	1|1	31	1
1	156673586	C	T	missense_variant	Tor3a	ENSMUSG00000060519	transcript	ENSMUST00000079625	protein_coding	c.281G>A	p.Arg94His	1|1	20	1	1|1	22	1	1|1	14	1	1|1	22	1
1	156674181	T	G	missense_variant	Tor3a	ENSMUSG00000060519	transcript	ENSMUST00000079625	protein_coding	c.125A>C	p.Lys42Thr	1|1	19	1	1|1	31	1	1|1	17	1	1|1	25	1
1	156823987	T	C	splice_region_variant&intron_variant	Ralgps2	ENSMUSG00000026594	transcript	ENSMUST00000063199	protein_coding	c.1268+4A>G		1|1	22	1	1|1	23	1	1|1	19	1	1|1	36	1
1	156832745	T	C	missense_variant	Ralgps2	ENSMUSG00000026594	transcript	ENSMUST00000063199	protein_coding	c.756A>G	p.Ile252Met	1|1	18	1	1|1	29	1	1|1	31	1	1|1	33	1
1	156845440	C	A	missense_variant	Angptl1	ENSMUSG00000033544	transcript	ENSMUST00000111720	protein_coding	c.835C>A	p.Pro279Thr	1|1	26	1	1|1	27	1	1|1	26	1	1|1	34	1
1	156845559	T	A	missense_variant	Angptl1	ENSMUSG00000033544	transcript	ENSMUST00000111720	protein_coding	c.954T>A	p.Asn318Lys	1|1	32	1	1|1	25	1	1|1	25	1	1|1	30	1
1	157100165	G	A	missense_variant	Tex35	ENSMUSG00000026592	transcript	ENSMUST00000118207	protein_coding	c.434C>T	p.Ala145Val	1|1	24	1	1|1	32	1	1|1	36	1	1|1	31	1
1	157100202	C	T	missense_variant	Tex35	ENSMUSG00000026592	transcript	ENSMUST00000118207	protein_coding	c.397G>A	p.Gly133Ser	1|1	26	1	1|1	37	1	1|1	35	1	1|1	35	1
1	157174137	G	C	splice_region_variant&intron_variant	Rasal2	ENSMUSG00000070565	transcript	ENSMUST00000078308	protein_coding	c.1624+6C>G		1|1	16	1	1|1	22	1	1|1	21	1	1|1	20	1
1	157179090	A	ATGTTTTCCCCCCC	splice_region_variant&intron_variant	Rasal2	ENSMUSG00000070565	transcript	ENSMUST00000078308	protein_coding	c.825+8_825+9insGGGGGGGAAAACA		1|1	28	1	1|1	19	1	1|1	17	1	1|1	28	1
1	157464402	G	T	splice_region_variant&intron_variant	BC026585	ENSMUSG00000033488	transcript	ENSMUST00000046743	protein_coding	c.257-7G>T		1|1	38	1	1|1	37	1	1|1	24	1	1|1	27	1
1	157464427	C	T	missense_variant	BC026585	ENSMUSG00000033488	transcript	ENSMUST00000046743	protein_coding	c.275C>T	p.Ala92Val	1|1	28	1	1|1	30	1	1|1	24	1	1|1	26	1
1	157467240	G	A	missense_variant	BC026585	ENSMUSG00000033488	transcript	ENSMUST00000046743	protein_coding	c.566G>A	p.Arg189His	1|1	19	1	1|1	30	1	1|1	22	1	1|1	44	1
1	157472419	G	A	splice_region_variant&intron_variant	BC026585	ENSMUSG00000033488	transcript	ENSMUST00000046743	protein_coding	c.984+3G>A		1|1	26	1	1|1	31	1	1|1	29	1	1|1	28	1
1	157472423	C	T	splice_region_variant&intron_variant	BC026585	ENSMUSG00000033488	transcript	ENSMUST00000046743	protein_coding	c.984+7C>T		1|1	26	1	1|1	32	1	1|1	29	1	1|1	27	1
1	157529202	G	T	5_prime_UTR_premature_start_codon_gain_variant	Sec16b	ENSMUSG00000026589	transcript	ENSMUST00000027881	protein_coding	c.-22G>T		1|1	29	0.97	1|1	36	1	1|1	29	1	1|1	39	1
1	157529318	T	C	missense_variant	Sec16b	ENSMUSG00000026589	transcript	ENSMUST00000027881	protein_coding	c.95T>C	p.Leu32Pro	1|1	31	1	1|1	38	1	1|1	15	1	1|1	37	1
1	157535456	C	T	missense_variant	Sec16b	ENSMUSG00000026589	transcript	ENSMUST00000027881	protein_coding	c.856C>T	p.Pro286Ser	1|1	21	1	1|1	31	1	1|1	19	1	1|1	35	1
1	157535520	T	A	splice_region_variant&intron_variant	Sec16b	ENSMUSG00000026589	transcript	ENSMUST00000027881	protein_coding	c.912+8T>A		1|1	23	1	1|1	37	1	1|1	18	1	1|1	36	1
1	157538254	C	A	missense_variant	Sec16b	ENSMUSG00000026589	transcript	ENSMUST00000027881	protein_coding	c.1252C>A	p.Leu418Ile	0/1	29	0.76	0/1	24	0.38	0/1	40	0.42	0/1	40	0.68
1	157558153	C	G	splice_region_variant&intron_variant	Sec16b	ENSMUSG00000026589	transcript	ENSMUST00000027881	protein_coding	c.2112+5C>G		1|1	21	1	1|1	23	1	1|1	25	1	1|1	17	1
1	157559468	C	T	missense_variant	Sec16b	ENSMUSG00000026589	transcript	ENSMUST00000027881	protein_coding	c.2132C>T	p.Pro711Leu	1|1	17	1	1|1	37	1	1|1	18	1	1|1	38	1
1	157565439	T	C	missense_variant	Sec16b	ENSMUSG00000026589	transcript	ENSMUST00000027881	protein_coding	c.2815T>C	p.Ser939Pro	1|1	31	1	1|1	24	1	1|1	21	1	1|1	27	1
1	158246692	C	T	missense_variant	Brinp2	ENSMUSG00000004031	transcript	ENSMUST00000004133	protein_coding	c.1858G>A	p.Ala620Thr	1|1	9	1	1|1	30	1	1|1	21	1	1|1	25	1
1	158266584	T	G	missense_variant	Brinp2	ENSMUSG00000004031	transcript	ENSMUST00000004133	protein_coding	c.547A>C	p.Thr183Pro	1|1	22	1	1|1	25	1	1|1	15	1	1|1	16	1
1	158509911	A	C	missense_variant	Astn1	ENSMUSG00000026587	transcript	ENSMUST00000046110	protein_coding	c.1186A>C	p.Ile396Leu	1|1	22	1	1|1	14	1	1|1	20	1	1|1	18	1
1	158579560	G	GGT	splice_region_variant&intron_variant	Astn1	ENSMUSG00000026587	transcript	ENSMUST00000046110	protein_coding	c.1623-10_1623-9dupGT		1|1	17	1	1|1	16	1	1|1	23	0.96	1|1	35	1
1	158597288	G	C	missense_variant	Astn1	ENSMUSG00000026587	transcript	ENSMUST00000046110	protein_coding	c.2043G>C	p.Glu681Asp	1|1	20	1	1|1	21	1	1|1	20	1	1|1	24	1
1	158667517	A	C	missense_variant	Astn1	ENSMUSG00000026587	transcript	ENSMUST00000046110	protein_coding	c.3134A>C	p.Asn1045Thr	1|1	18	1	1|1	28	1	1|1	20	1	1|1	33	1
1	158750571	G	A	missense_variant	Pappa2	ENSMUSG00000073530	transcript	ENSMUST00000159861	protein_coding	c.5155C>T	p.His1719Tyr	1|1	10	1	1|1	12	1	1|1	28	1	1|1	24	1
1	158761523	C	T	splice_region_variant&intron_variant	Pappa2	ENSMUSG00000073530	transcript	ENSMUST00000159861	protein_coding	c.5124+7G>A		1|1	27	1	1|1	24	1	1|1	27	1	1|1	35	1
1	158765041	C	T	missense_variant	Pappa2	ENSMUSG00000073530	transcript	ENSMUST00000159861	protein_coding	c.4765G>A	p.Val1589Ile	1|1	13	1	1|1	18	1	1|1	26	1	1|1	27	1
1	158782183	C	T	splice_region_variant&synonymous_variant	Pappa2	ENSMUSG00000073530	transcript	ENSMUST00000159861	protein_coding	c.4707G>A	p.Lys1569Lys	1|1	31	1	1|1	24	1	1|1	25	1	1|1	30	1
1	158787723	G	A	missense_variant	Pappa2	ENSMUSG00000073530	transcript	ENSMUST00000159861	protein_coding	c.4184C>T	p.Ala1395Val	1|1	12	1	1|1	18	1	1|1	29	1	1|1	21	1
1	158814493	T	G	missense_variant	Pappa2	ENSMUSG00000073530	transcript	ENSMUST00000159861	protein_coding	c.3992A>C	p.His1331Pro	1|1	17	1	1|1	22	1	1|1	25	1	1|1	17	1
1	158814833	T	C	missense_variant	Pappa2	ENSMUSG00000073530	transcript	ENSMUST00000159861	protein_coding	c.3841A>G	p.Ile1281Val	1|1	31	1	1|1	17	1	1|1	26	1	1|1	43	1
1	158832839	T	C	missense_variant	Pappa2	ENSMUSG00000073530	transcript	ENSMUST00000159861	protein_coding	c.3671A>G	p.His1224Arg	1|1	15	1	1|1	19	1	1|1	27	1	1|1	28	1
1	158834769	G	A	missense_variant	Pappa2	ENSMUSG00000073530	transcript	ENSMUST00000159861	protein_coding	c.3635C>T	p.Thr1212Ile	1|1	22	1	1|1	23	1	1|1	28	1	1|1	30	1
1	158834943	C	T	missense_variant&splice_region_variant	Pappa2	ENSMUSG00000073530	transcript	ENSMUST00000159861	protein_coding	c.3461G>A	p.Gly1154Glu	1|1	26	1	1|1	21	1	1|1	26	1	1|1	15	1
1	158845048	G	C	missense_variant	Pappa2	ENSMUSG00000073530	transcript	ENSMUST00000159861	protein_coding	c.3324C>G	p.Ser1108Arg	1|1	28	1	1|1	19	1	1|1	26	1	1|1	35	1
1	158845082	A	C	missense_variant	Pappa2	ENSMUSG00000073530	transcript	ENSMUST00000159861	protein_coding	c.3290T>G	p.Val1097Gly	1|1	36	1	1|1	20	1	1|1	25	1	1|1	37	1
1	158845116	G	T	missense_variant	Pappa2	ENSMUSG00000073530	transcript	ENSMUST00000159861	protein_coding	c.3256C>A	p.Gln1086Lys	1|1	35	1	1|1	16	1	1|1	23	1	1|1	38	1
1	158871555	A	G	splice_region_variant&intron_variant	Pappa2	ENSMUSG00000073530	transcript	ENSMUST00000159861	protein_coding	c.1995-8T>C		1|1	22	1	1|1	13	1	1|1	19	1	1|1	25	1
1	158956583	C	T	missense_variant	Pappa2	ENSMUSG00000073530	transcript	ENSMUST00000159861	protein_coding	c.856G>A	p.Glu286Lys	1|1	21	1	1|1	38	1	1|1	30	1	1|1	27	1
1	158956669	G	T	missense_variant	Pappa2	ENSMUSG00000073530	transcript	ENSMUST00000159861	protein_coding	c.770C>A	p.Ser257Tyr	1|1	17	1	1|1	31	1	1|1	31	1	1|1	25	1
1	158956870	T	C	missense_variant	Pappa2	ENSMUSG00000073530	transcript	ENSMUST00000159861	protein_coding	c.569A>G	p.Lys190Arg	1|1	17	1	1|1	24	1	1|1	17	1	1|1	29	1
1	158957396	T	C	missense_variant	Pappa2	ENSMUSG00000073530	transcript	ENSMUST00000159861	protein_coding	c.43A>G	p.Thr15Ala	1|1	13	1	1|1	23	1	1|1	21	1	1|1	21	1
1	158968869	A	T	missense_variant	1600012P17Rik	ENSMUSG00000047661	transcript	ENSMUST00000062159	protein_coding	c.990T>A	p.Asp330Glu	1|1	22	1	1|1	24	1	1|1	17	1	1|1	27	1
1	158969728	G	A	missense_variant	1600012P17Rik	ENSMUSG00000047661	transcript	ENSMUST00000062159	protein_coding	c.131C>T	p.Thr44Ile	1|1	25	1	1|1	25	0.96	1|1	26	1	1|1	33	1
1	158979736	A	G	5_prime_UTR_premature_start_codon_gain_variant	1600012P17Rik	ENSMUSG00000047661	transcript	ENSMUST00000062159	protein_coding	c.-66T>C		1|1	23	1	1|1	16	1	1|1	23	1	1|1	36	1
1	158980309	A	G	splice_donor_variant&intron_variant	1600012P17Rik	ENSMUSG00000047661	transcript	ENSMUST00000062159	protein_coding	c.-165+2T>C		1|1	12	1	1|1	23	1	1|1	28	1	1|1	29	1
1	158980311	A	G	splice_region_variant	1600012P17Rik	ENSMUSG00000047661	transcript	ENSMUST00000062159	protein_coding	c.-165T>C		1|1	11	1	1|1	23	1	1|1	29	1	1|1	29	1
1	158980412	G	A	5_prime_UTR_premature_start_codon_gain_variant	1600012P17Rik	ENSMUSG00000047661	transcript	ENSMUST00000062159	protein_coding	c.-266C>T		1|1	13	1	1|1	22	1	1|1	19	1	1|1	31	1
1	159168603	C	T	missense_variant	Gm4953	ENSMUSG00000061992	transcript	ENSMUST00000077309	protein_coding	c.40G>A	p.Val14Ile	1|1	22	1	1|1	22	1	1|1	26	1	1|1	35	1
1	159684570	G	T	missense_variant	Gm10530	ENSMUSG00000073528	transcript	ENSMUST00000097514	protein_coding	c.88G>T	p.Ala30Ser	1|1	21	1	1|1	14	1	1|1	19	1	1|1	29	1
1	159684607	A	G	missense_variant	Gm10530	ENSMUSG00000073528	transcript	ENSMUST00000097514	protein_coding	c.125A>G	p.His42Arg	1|1	27	1	1|1	14	1	1|1	21	1	1|1	31	1
1	159684816	C	T	missense_variant	Gm10530	ENSMUSG00000073528	transcript	ENSMUST00000097514	protein_coding	c.334C>T	p.Leu112Phe	1|1	14	1	1|1	29	1	1|1	22	1	1|1	27	1
1	159684858	C	T	missense_variant	Gm10530	ENSMUSG00000073528	transcript	ENSMUST00000097514	protein_coding	c.376C>T	p.Leu126Phe	1|1	19	1	1|1	27	1	1|1	19	1	1|1	26	1
1	159684873	C	T	missense_variant&splice_region_variant	Gm10530	ENSMUSG00000073528	transcript	ENSMUST00000097514	protein_coding	c.391C>T	p.Leu131Phe	1|1	19	1	1|1	26	1	1|1	20	1	1|1	25	1
1	159850197	G	C	missense_variant	Tnr	ENSMUSG00000015829	transcript	ENSMUST00000111669	protein_coding	c.151G>C	p.Ala51Pro	1|1	22	1	1|1	32	1	1|1	34	1	1|1	28	1
1	159858348	T	C	missense_variant	Tnr	ENSMUSG00000015829	transcript	ENSMUST00000111669	protein_coding	c.1148T>C	p.Met383Thr	1|1	24	1	1|1	19	1	1|1	14	1	1|1	24	1
1	159886989	A	G	missense_variant	Tnr	ENSMUSG00000015829	transcript	ENSMUST00000111669	protein_coding	c.2437A>G	p.Lys813Glu	1|1	26	1	1|1	22	1	1|1	15	1	1|1	33	1
1	159914640	T	C	splice_region_variant&intron_variant	Tnr	ENSMUSG00000015829	transcript	ENSMUST00000111669	protein_coding	c.3631+8T>C		1|1	24	1	1|1	30	1	1|1	31	1	1|1	38	1
1	159919046	C	T	missense_variant	Tnr	ENSMUSG00000015829	transcript	ENSMUST00000111669	protein_coding	c.3734C>T	p.Ala1245Val	1|1	30	1	1|1	21	1	1|1	19	1	1|1	36	1
1	160044676	CT	C	frameshift_variant	4930523C07Rik	ENSMUSG00000050883	transcript	ENSMUST00000168359	protein_coding	c.95delT	p.Leu32fs	1|1	17	1	1|1	25	1	1|1	29	1	1|1	17	1
1	160044708	A	G	missense_variant	4930523C07Rik	ENSMUSG00000050883	transcript	ENSMUST00000168359	protein_coding	c.125A>G	p.Gln42Arg	1|1	14	1	1|1	23	1	1|1	33	1	1|1	21	1
1	160044935	G	A	splice_region_variant&non_coding_transcript_exon_variant	4930523C07Rik	ENSMUSG00000090394	transcript	ENSMUST00000165923	processed_transcript	n.310G>A		1|1	20	1	1|1	45	1	1|1	22	1	1|1	29	1
1	160070717	T	C	missense_variant	4930523C07Rik	ENSMUSG00000050883	transcript	ENSMUST00000168359	protein_coding	c.188T>C	p.Leu63Pro	1|1	27	1	1|1	23	1	1|1	19	1	1|1	30	1
1	160074735	G	A	splice_region_variant	4930562F07Rik	ENSMUSG00000026729	transcript	ENSMUST00000028061	protein_coding	c.*414C>T		1|1	26	1	1|1	22	1	1|1	40	1	1|1	38	1
1	160077419	TCTC	T	conservative_inframe_deletion	4930562F07Rik	ENSMUSG00000026729	transcript	ENSMUST00000028061	protein_coding	c.151_153delGAG	p.Glu51del	1|1	26	1	1|1	22	1	1|1	19	1	1|1	20	1
1	160105424	C	T	missense_variant	Tnn	ENSMUSG00000026725	transcript	ENSMUST00000039178	protein_coding	c.3938G>A	p.Arg1313Gln	1|1	23	1	1|1	24	1	1|1	19	1	1|1	24	1
1	160114556	G	A	missense_variant	Tnn	ENSMUSG00000026725	transcript	ENSMUST00000039178	protein_coding	c.3371C>T	p.Thr1124Met	1|1	21	1	1|1	29	1	1|1	23	1	1|1	40	1
1	160118332	C	T	splice_region_variant&intron_variant	Tnn	ENSMUSG00000026725	transcript	ENSMUST00000039178	protein_coding	c.2908+7G>A		1|1	23	1	1|1	21	1	1|1	27	1	1|1	22	1
1	160146351	G	A	missense_variant	Tnn	ENSMUSG00000026725	transcript	ENSMUST00000039178	protein_coding	c.445C>T	p.Leu149Phe	1|1	33	1	1|1	28	1	1|1	19	1	1|1	38	1
1	160147563	T	C	missense_variant	Tnn	ENSMUSG00000026725	transcript	ENSMUST00000039178	protein_coding	c.293A>G	p.Asn98Ser	1|1	27	1	1|1	15	1	1|1	16	1	1|1	27	1
1	160195234	C	T	5_prime_UTR_premature_start_codon_gain_variant	Mrps14	ENSMUSG00000058267	transcript	ENSMUST00000135680	protein_coding	c.-33C>T		1|1	17	1	1|1	24	1	1|1	22	1	1|1	22	1
1	160195252	G	T	5_prime_UTR_premature_start_codon_gain_variant	Mrps14	ENSMUSG00000058267	transcript	ENSMUST00000135680	protein_coding	c.-15G>T		1|1	14	1	1|1	27	1	1|1	21	1	1|1	25	1
1	160236712	TA	T	splice_region_variant&intron_variant	Rabgap1l	ENSMUSG00000026721	transcript	ENSMUST00000028052	protein_coding	c.607-4delT		1|1	15	1	1|1	28	1	1|1	26	1	1|1	18	1
1	160257539	C	A	splice_region_variant&intron_variant	Rabgap1l	ENSMUSG00000026721	transcript	ENSMUST00000028049	protein_coding	c.2341-4G>T		1|1	33	1	1|1	13	1	1|1	19	1	1|1	30	1
1	160342169	A	G	splice_region_variant&intron_variant	Rabgap1l	ENSMUSG00000026721	transcript	ENSMUST00000028049	protein_coding	c.2212-5T>C		1|1	28	1	1|1	30	1	1|1	38	1	1|1	34	1
1	160739013	C	T	missense_variant	Rabgap1l	ENSMUSG00000026721	transcript	ENSMUST00000028049	protein_coding	c.214G>A	p.Gly72Ser	1|1	18	1	1|1	17	1	1|1	34	1	1|1	21	1
1	160739066	T	G	missense_variant	Rabgap1l	ENSMUSG00000026721	transcript	ENSMUST00000028049	protein_coding	c.161A>C	p.Gln54Pro	1|1	19	1	1|1	19	1	1|1	25	1	1|1	21	1
1	160978722	A	G	splice_region_variant&intron_variant	Serpinc1	ENSMUSG00000026715	transcript	ENSMUST00000064725	protein_coding	c.-103+7A>G		1|1	27	1	1|1	18	1	1|1	21	1	1|1	35	1
1	160997710	C	A	missense_variant	Serpinc1	ENSMUSG00000026715	transcript	ENSMUST00000064725	protein_coding	c.1126C>A	p.Leu376Ile	1|1	19	1	1|1	35	1	1|1	28	1	1|1	22	1
1	161035811	CAG	C	splice_region_variant&intron_variant	Gas5	ENSMUSG00000053332	transcript	ENSMUST00000160152	retained_intron	n.89+8_89+9delAG		1|1	23	1	1|1	22	1	1|1	29	1	1|1	32	1
1	161036022	C	A	splice_region_variant&intron_variant	Gas5	ENSMUSG00000053332	transcript	ENSMUST00000160152	retained_intron	n.121+8C>A		1|1	26	1	1|1	19	1	1|1	21	1	1|1	31	1
1	161036195	TCC	T	splice_region_variant&intron_variant	Gas5	ENSMUSG00000053332	transcript	ENSMUST00000160152	retained_intron	n.122-4_122-3delCC		1|1	16	1	1|1	18	1	1|1	37	1	1|1	23	1
1	161036586	C	G	splice_region_variant&intron_variant	Gas5	ENSMUSG00000053332	transcript	ENSMUST00000160152	retained_intron	n.189+7C>G		1|1	30	1	1|1	15	1	1|1	17	1	1|1	25	1
1	161038442	TGTTG	T	splice_region_variant&intron_variant	Gas5	ENSMUSG00000053332	transcript	ENSMUST00000161229	retained_intron	n.2474-10_2474-7delGTTG		1|1	27	1	1|1	23	1	1|1	24	1	1|1	38	1
1	161043605	T	C	splice_region_variant&intron_variant	Dars2	ENSMUSG00000026709	transcript	ENSMUST00000035430	protein_coding	c.1747+8A>G		1|1	29	1	1|1	27	1	1|1	20	1	1|1	23	1
1	161045252	C	T	splice_region_variant&intron_variant	Dars2	ENSMUSG00000026709	transcript	ENSMUST00000035430	protein_coding	c.1560+6G>A		1|1	30	1	1|1	23	1	1|1	20	1	1|1	36	1
1	161046833	T	A	missense_variant	Dars2	ENSMUSG00000026709	transcript	ENSMUST00000035430	protein_coding	c.1285A>T	p.Met429Leu	1|1	40	1	1|1	14	1	1|1	29	1	1|1	45	1
1	161051348	A	G	missense_variant	Dars2	ENSMUSG00000026709	transcript	ENSMUST00000035430	protein_coding	c.1108T>C	p.Cys370Arg	1|1	26	1	1|1	38	1	1|1	24	1	1|1	39	1
1	161063243	G	A	splice_region_variant&intron_variant	Dars2	ENSMUSG00000026709	transcript	ENSMUST00000035430	protein_coding	c.393+4C>T		1|1	38	1	1|1	21	1	1|1	17	1	1|1	38	1
1	161063355	G	A	splice_region_variant&intron_variant	Dars2	ENSMUSG00000026709	transcript	ENSMUST00000035430	protein_coding	c.292-7C>T		1|1	24	1	1|1	25	1	1|1	37	1	1|1	27	1
1	161070092	G	T	missense_variant	Dars2	ENSMUSG00000026709	transcript	ENSMUST00000035430	protein_coding	c.25C>A	p.Arg9Ser	1|1	19	1	1|1	15	1	1|1	23	1	1|1	38	1
1	161070255	T	A	5_prime_UTR_premature_start_codon_gain_variant	Dars2	ENSMUSG00000026709	transcript	ENSMUST00000035430	protein_coding	c.-139A>T		1|1	24	1	1|1	28	1	1|1	38	1	1|1	35	1
1	161070264	T	A	5_prime_UTR_premature_start_codon_gain_variant	Dars2	ENSMUSG00000026709	transcript	ENSMUST00000035430	protein_coding	c.-148A>T		1|1	23	1	1|1	26	1	1|1	36	1	1|1	36	1
1	161070386	G	A	5_prime_UTR_premature_start_codon_gain_variant	Dars2	ENSMUSG00000026709	transcript	ENSMUST00000035430	protein_coding	c.-270C>T		1|1	32	1	1|1	23	1	1|1	24	1	1|1	37	1
1	161070504	T	C	5_prime_UTR_premature_start_codon_gain_variant	Dars2	ENSMUSG00000026709	transcript	ENSMUST00000035430	protein_coding	c.-388A>G		1|1	31	1	1|1	25	1	1|1	26	1	1|1	41	1
1	161070596	G	T	5_prime_UTR_premature_start_codon_gain_variant	Dars2	ENSMUSG00000026709	transcript	ENSMUST00000035430	protein_coding	c.-480C>A		1|1	28	1	1|1	20	1	1|1	24	1	1|1	33	1
1	161083424	T	G	missense_variant	Cenpl	ENSMUSG00000026708	transcript	ENSMUST00000111618	protein_coding	c.940T>G	p.Ser314Ala	1|1	21	1	1|1	16	1	1|1	19	1	1|1	24	1
1	161083474	G	C	stop_lost	Cenpl	ENSMUSG00000026708	transcript	ENSMUST00000028035	protein_coding	c.990G>C	p.Ter330Tyrext*?	1|1	16	1	1|1	11	1	1|1	16	1	1|1	14	1
1	161244224	G	T	missense_variant	Prdx6	ENSMUSG00000026701	transcript	ENSMUST00000071718	protein_coding	c.371C>A	p.Ala124Asp	1|1	30	1	1|1	24	1	1|1	21	1	1|1	45	1
1	161503752	C	A	missense_variant	Tnfsf18	ENSMUSG00000066755	transcript	ENSMUST00000086084	protein_coding	c.470C>A	p.Thr157Asn	1|1	21	1	1|1	14	1	1|1	35	1	1|1	22	1
1	161781763	T	C	missense_variant	Fasl	ENSMUSG00000000817	transcript	ENSMUST00000000834	protein_coding	c.653A>G	p.Glu218Gly	1|1	33	1	1|1	29	1	1|1	32	1	1|1	26	1
1	161781866	T	C	missense_variant	Fasl	ENSMUSG00000000817	transcript	ENSMUST00000000834	protein_coding	c.550A>G	p.Thr184Ala	1|1	21	1	1|1	23	0.96	1|1	31	1	1|1	20	1
1	161788340	G	A	5_prime_UTR_premature_start_codon_gain_variant	Fasl	ENSMUSG00000000817	transcript	ENSMUST00000000834	protein_coding	c.-55C>T		1|1	17	1	1|1	8	1	1|1	25	1	1|1	28	1
1	161834798	C	T	missense_variant	Suco	ENSMUSG00000040297	transcript	ENSMUST00000048377	protein_coding	c.2063G>A	p.Ser688Asn	1|1	15	1	1|1	28	1	1|1	26	1	1|1	27	1
1	161844885	C	T	splice_region_variant&intron_variant	Suco	ENSMUSG00000040297	transcript	ENSMUST00000048377	protein_coding	c.1350-5G>A		1|1	26	1	1|1	14	1	1|1	26	1	1|1	32	1
1	161857375	C	G	missense_variant	Suco	ENSMUSG00000040297	transcript	ENSMUST00000048377	protein_coding	c.547G>C	p.Glu183Gln	1|1	22	1	1|1	19	1	1|1	28	1	1|1	30	1
1	161942437	G	A	missense_variant	4930558K02Rik	ENSMUSG00000086277	transcript	ENSMUST00000162676	protein_coding	c.502C>T	p.Arg168Cys	1|1	24	1	1|1	27	1	1|1	21	1	1|1	33	1
1	161969231	A	G	5_prime_UTR_premature_start_codon_gain_variant	Pigc	ENSMUSG00000026698	transcript	ENSMUST00000028021	protein_coding	c.-273A>G		1|1	11	1	1|1	17	1	1|1	16	1	1|1	30	1
1	161969483	T	C	splice_region_variant&intron_variant	Pigc	ENSMUSG00000026698	transcript	ENSMUST00000159648	protein_coding	c.-212+6T>C		1|1	20	1	1|1	16	1	1|1	12	1	1|1	13	1
1	162016493	G	A	splice_region_variant&non_coding_transcript_exon_variant	2810442N19Rik	ENSMUSG00000090260	transcript	ENSMUST00000160555	antisense	n.439G>A		1|1	27	1	1|1	26	1	1|1	22	1	1|1	44	1
1	162045386	C	A	missense_variant	Dnm3	ENSMUSG00000040265	transcript	ENSMUST00000086074	protein_coding	c.1893G>T	p.Lys631Asn	1|1	31	1	1|1	32	1	1|1	27	1	1|1	41	1
1	162273291	A	AG	splice_region_variant&non_coding_transcript_exon_variant	Dnm3	ENSMUSG00000040265	transcript	ENSMUST00000162330	processed_transcript	n.419dupC		1|1	18	1	1|1	12	0.92	1|1	22	1	1|1	21	1
1	162477971	A	G	missense_variant	Gm10176	ENSMUSG00000066752	transcript	ENSMUST00000159707	protein_coding	c.290A>G	p.His97Arg	1|1	27	1	1|1	20	1	1|1	22	1	1|1	23	1
1	162532128	A	G	splice_region_variant	Mettl13	ENSMUSG00000026694	transcript	ENSMUST00000028017	protein_coding	c.*2148T>C		1|1	17	1	1|1	16	1	1|1	31	1	1|1	43	1
1	162537121	T	TCTC	conservative_inframe_insertion	Mettl13	ENSMUSG00000026694	transcript	ENSMUST00000028017	protein_coding	c.1685_1687dupGAG	p.Gly562dup	1|1	29	1	1|1	25	1	1|1	24	1	1|1	20	1
1	162545899	C	T	missense_variant	Mettl13	ENSMUSG00000026694	transcript	ENSMUST00000028017	protein_coding	c.782G>A	p.Arg261His	1|1	30	1	1|1	15	1	1|1	21	1	1|1	30	1
1	162548529	T	C	5_prime_UTR_premature_start_codon_gain_variant	Mettl13	ENSMUSG00000026694	transcript	ENSMUST00000028017	protein_coding	c.-273A>G		1|1	17	1	1|1	10	1	1|1	20	1	1|1	24	1
1	162571065	G	A	splice_region_variant&intron_variant	Vamp4	ENSMUSG00000026696	transcript	ENSMUST00000150040	protein_coding	c.-54+5G>A		1|1	13	1	1|1	22	1	1|1	10	1	1|1	34	1
1	162639753	A	G	missense_variant	Myoc	ENSMUSG00000026697	transcript	ENSMUST00000028020	protein_coding	c.490A>G	p.Thr164Ala	1|1	23	1	1|1	26	1	1|1	25	1	1|1	27	1
1	162654509	G	A	missense_variant	7420461P10Rik	ENSMUSG00000091060	transcript	ENSMUST00000169439	protein_coding	c.292C>T	p.Leu98Phe	1|1	22	1	1|1	35	1	1|1	27	1	1|1	37	1
1	162678232	G	A	splice_region_variant&intron_variant	Prrc2c	ENSMUSG00000040225	transcript	ENSMUST00000182660	protein_coding	c.7600-4C>T		1|1	21	1	1|1	35	1	1|1	17	1	1|1	29	1
1	162697647	GTGGGTC	G	disruptive_inframe_deletion	Prrc2c	ENSMUSG00000040225	transcript	ENSMUST00000182660	protein_coding	c.5661_5666delGACCCA	p.Gln1887_Thr1888del	1|1	27	1	1|1	10	1	1|1	27	1	1|1	20	1
1	162704573	T	A	missense_variant	Prrc2c	ENSMUSG00000040225	transcript	ENSMUST00000182660	protein_coding	c.4472A>T	p.Lys1491Met	1|1	16	1	1|1	28	1	1|1	28	1	1|1	21	1
1	162706508	T	C	missense_variant	Prrc2c	ENSMUSG00000040225	transcript	ENSMUST00000182660	protein_coding	c.2537A>G	p.Glu846Gly	1|1	28	1	1|1	21	1	1|1	26	1	1|1	36	1
1	162718880	G	C	missense_variant	Prrc2c	ENSMUSG00000040225	transcript	ENSMUST00000182660	protein_coding	c.557C>G	p.Ser186Cys	1|1	34	1	1|1	29	1	1|1	20	1	1|1	33	1
1	162795070	G	A	missense_variant	Fmo4	ENSMUSG00000026692	transcript	ENSMUST00000028014	protein_coding	c.1229C>T	p.Thr410Met	1|1	17	1	1|1	24	1	1|1	23	1	1|1	43	1
1	162799048	T	C	missense_variant	Fmo4	ENSMUSG00000026692	transcript	ENSMUST00000028014	protein_coding	c.928A>G	p.Ile310Val	1|1	24	1	1|1	27	1	1|1	21	1	1|1	26	1
1	162803773	A	C	splice_region_variant&intron_variant	Fmo4	ENSMUSG00000026692	transcript	ENSMUST00000028014	protein_coding	c.628-4T>G		1|1	29	1	1|1	26	1	1|1	21	1	1|1	21	1
1	162805167	T	C	missense_variant	Fmo4	ENSMUSG00000026692	transcript	ENSMUST00000028014	protein_coding	c.614A>G	p.Glu205Gly	1|1	30	1	1|1	22	1	1|1	18	1	1|1	24	1
1	162808440	C	T	missense_variant	Fmo4	ENSMUSG00000026692	transcript	ENSMUST00000028014	protein_coding	c.142G>A	p.Glu48Lys	1|1	16	1	1|1	23	1	1|1	27	1	1|1	26	1
1	162830432	T	G	splice_region_variant&intron_variant	Fmo1	ENSMUSG00000040181	transcript	ENSMUST00000136120	processed_transcript	n.36+6A>C		1|1	27	1	1|1	12	1	1|1	21	1	1|1	35	1
1	162832956	C	T	splice_region_variant&intron_variant	Fmo1	ENSMUSG00000040181	transcript	ENSMUST00000046049	protein_coding	c.1256+7G>A		1|1	27	1	1|1	17	1	1|1	24	1	1|1	35	1
1	162836124	T	A	splice_region_variant&intron_variant	Fmo1	ENSMUSG00000040181	transcript	ENSMUST00000046049	protein_coding	c.827+8A>T		1|1	24	1	1|1	17	1	1|1	16	1	1|1	24	1
1	162850232	G	A	splice_region_variant&intron_variant	Fmo1	ENSMUSG00000040181	transcript	ENSMUST00000046049	protein_coding	c.322-8C>T		1|1	21	1	1|1	19	1	1|1	33	1	1|1	34	1
1	162886306	C	T	splice_region_variant&intron_variant	Fmo2	ENSMUSG00000040170	transcript	ENSMUST00000045902	protein_coding	c.627+3G>A		1|1	26	1	1|1	24	1	1|1	18	1	1|1	26	1
1	162887728	G	T	splice_region_variant&synonymous_variant	Fmo2	ENSMUSG00000040170	transcript	ENSMUST00000045902	protein_coding	c.324C>A	p.Thr108Thr	1|1	32	1	1|1	19	1	1|1	12	1	1|1	27	1
1	162888810	G	C	missense_variant	Fmo2	ENSMUSG00000040170	transcript	ENSMUST00000045902	protein_coding	c.207C>G	p.Phe69Leu	0/1	19	0.26	0/1	27	0.44	0/1	27	0.33	0/1	41	0.29
1	162898382	T	C	5_prime_UTR_premature_start_codon_gain_variant	Fmo2	ENSMUSG00000040170	transcript	ENSMUST00000111510	protein_coding	c.-77A>G		1|1	30	1	1|1	23	1	1|1	18	1	1|1	36	1
1	162898386	T	C	splice_region_variant&intron_variant	Fmo2	ENSMUSG00000040170	transcript	ENSMUST00000143123	protein_coding	c.-7+8A>G		1|1	30	1	1|1	24	1	1|1	19	1	1|1	37	1
1	162916743	C	T	missense_variant	Fmo6	ENSMUSG00000095576	transcript	ENSMUST00000178465	protein_coding	c.1579G>A	p.Val527Ile	1|1	17	1	1|1	17	1	1|1	26	1	1|1	46	1
1	162922717	T	C	missense_variant	Fmo6	ENSMUSG00000095576	transcript	ENSMUST00000178465	protein_coding	c.769A>G	p.Ile257Val	1|1	25	1	1|1	31	1	1|1	27	1	1|1	40	1
1	163075686	A	G	splice_region_variant&intron_variant	Mroh9	ENSMUSG00000071890	transcript	ENSMUST00000096608	protein_coding	c.153-6T>C		1|1	24	1	1|1	26	1	1|1	30	1	1|1	40	1
1	163080615	A	C	splice_region_variant&intron_variant	Mroh9	ENSMUSG00000071890	transcript	ENSMUST00000096608	protein_coding	c.-30-6T>G		1|1	19	1	1|1	18	1	1|1	22	1	1|1	26	1
1	163085623	T	C	5_prime_UTR_premature_start_codon_gain_variant	Mroh9	ENSMUSG00000071890	transcript	ENSMUST00000096608	protein_coding	c.-92A>G		1|1	34	1	1|1	18	1	1|1	12	1	1|1	30	1
1	171051722	A	C	missense_variant	Fcgr3	ENSMUSG00000059498	transcript	ENSMUST00000164044	protein_coding	c.750T>G	p.Asp250Glu	1|1	37	1	1|1	36	1	1|1	30	1	1|1	40	1
1	171051851	G	A	splice_region_variant&synonymous_variant	Fcgr3	ENSMUSG00000059498	transcript	ENSMUST00000164044	protein_coding	c.621C>T	p.Asp207Asp	1|1	43	1	1|1	49	1	1|1	29	1	1|1	47	1
1	171051858	G	A	splice_region_variant&intron_variant	Fcgr3	ENSMUSG00000059498	transcript	ENSMUST00000164044	protein_coding	c.620-6C>T		1|1	42	1	1|1	50	1	1|1	32	1	1|1	48	1
1	171057688	T	A	splice_region_variant&intron_variant	Fcgr3	ENSMUSG00000059498	transcript	ENSMUST00000164044	protein_coding	c.364+3A>T		1|1	22	1	1|1	29	1	1|1	21	1	1|1	36	1
1	171057793	A	C	missense_variant	Fcgr3	ENSMUSG00000059498	transcript	ENSMUST00000164044	protein_coding	c.262T>G	p.Ser88Ala	1|1	17	1	1|1	25	1	1|1	14	1	1|1	19	1
1	171057815	A	C	missense_variant	Fcgr3	ENSMUSG00000059498	transcript	ENSMUST00000164044	protein_coding	c.240T>G	p.Ser80Arg	1|1	25	1	1|1	31	1	1|1	14	1	1|1	24	1
1	171057820	A	C	missense_variant	Fcgr3	ENSMUSG00000059498	transcript	ENSMUST00000164044	protein_coding	c.235T>G	p.Trp79Gly	1|1	25	1	1|1	30	1	1|1	15	1	1|1	23	1
1	171222110	G	A	5_prime_UTR_premature_start_codon_gain_variant	Tomm40l	ENSMUSG00000005674	transcript	ENSMUST00000005817	protein_coding	c.-92C>T		1|1	26	1	1|1	27	1	1|1	24	1	1|1	28	1
1	171225742	T	A	missense_variant	Apoa2	ENSMUSG00000005681	transcript	ENSMUST00000005824	protein_coding	c.129T>A	p.Asp43Glu	1|1	35	1	1|1	33	1	1|1	28	1	1|1	41	1
1	171225758	A	G	missense_variant	Apoa2	ENSMUSG00000005681	transcript	ENSMUST00000005824	protein_coding	c.145A>G	p.Met49Val	1|1	35	1	1|1	29	1	1|1	26	1	1|1	44	1
1	171225795	C	T	missense_variant	Apoa2	ENSMUSG00000005681	transcript	ENSMUST00000005824	protein_coding	c.182C>T	p.Ala61Val	1|1	39	1	1|1	27	1	1|1	25	1	1|1	46	1
1	171235338	A	G	splice_region_variant&intron_variant	Ndufs2	ENSMUSG00000013593	transcript	ENSMUST00000013737	protein_coding	c.1297-8T>C		1|1	25	1	1|1	31	1	1|1	29	1	1|1	40	1
1	171237947	A	G	splice_region_variant&synonymous_variant	Ndufs2	ENSMUSG00000013593	transcript	ENSMUST00000013737	protein_coding	c.984T>C	p.Asp328Asp	1|1	25	1	1|1	39	1	1|1	22	1	1|1	32	1
1	171238380	C	T	splice_region_variant&intron_variant	Ndufs2	ENSMUSG00000013593	transcript	ENSMUST00000013737	protein_coding	c.781-8G>A		1|1	31	1	1|1	41	1	1|1	18	1	1|1	49	1
1	171240020	C	T	splice_region_variant&intron_variant	Ndufs2	ENSMUSG00000013593	transcript	ENSMUST00000131286	protein_coding	c.27+8G>A		1|1	25	1	1|1	38	1	1|1	27	1	1|1	23	1
1	171250901	A	G	missense_variant	Adamts4	ENSMUSG00000006403	transcript	ENSMUST00000006570	protein_coding	c.89A>G	p.Gln30Arg	1|1	21	1	1|1	33	1	1|1	18	1	1|1	25	1
1	171252330	A	T	5_prime_UTR_premature_start_codon_gain_variant	Adamts4	ENSMUSG00000006403	transcript	ENSMUST00000111314	protein_coding	c.-141A>T		1|1	19	1	1|1	28	1	1|1	15	1	1|1	43	1
1	171252513	A	ATT	frameshift_variant	Adamts4	ENSMUSG00000006403	transcript	ENSMUST00000111314	protein_coding	c.50_51dupTT	p.Leu18fs	1|1	16	1	1|1	37	1	1|1	18	1	1|1	31	1
1	171260636	C	CAAAG	splice_region_variant	Adamts4	ENSMUSG00000006403	transcript	ENSMUST00000111315	protein_coding	c.*1458_*1459insAAAG		1|1	13	1	1|1	22	1	1|1	18	1	1|1	12	1
1	171280009	G	A	splice_region_variant&intron_variant	Ppox	ENSMUSG00000062729	transcript	ENSMUST00000073120	protein_coding	c.339-8C>T		1|1	20	1	1|1	31	1	1|1	28	1	1|1	40	1
1	171280259	T	C	splice_region_variant&intron_variant	Ppox	ENSMUSG00000062729	transcript	ENSMUST00000073120	protein_coding	c.223-4A>G		1|1	15	1	1|1	35	1	1|1	18	1	1|1	34	1
1	171282610	TCCTGCGGGTTAAATAACATCAGTTTCCACACCCAGTTGTGTCTCCCTCCTGAAGATTCTTTAGGAGGTTCCCTGCCAGACTCA	T	frameshift_variant&splice_acceptor_variant&splice_donor_variant&splice_region_variant&intron_variant	Usp21	ENSMUSG00000053483	transcript	ENSMUST00000111306	protein_coding	c.1504+2_1505delTGAGTCTGGCAGGGAACCTCCTAAAGAATCTTCAGGAGGGAGACACAACTGGGTGTGGAAACTGATGTTATTTAACCCGCAGG	p.Gly502fs	0/1	61	0.23	0/1	72	0.39	0/1	52	0.38	0/1	74	0.24
1	171284618	A	G	missense_variant	Usp21	ENSMUSG00000053483	transcript	ENSMUST00000111306	protein_coding	c.1021T>C	p.Cys341Arg	1|1	33	1	1|1	33	1	1|1	48	1	1|1	45	1
1	171285327	G	A	stop_gained	Usp21	ENSMUSG00000053483	transcript	ENSMUST00000111306	protein_coding	c.718C>T	p.Arg240*	0/1	39	0.51	0/1	56	0.27	0/1	36	0.31	0/1	37	0.32
1	171285386	G	A	splice_acceptor_variant&intron_variant	Usp21	ENSMUSG00000053483	transcript	ENSMUST00000111306	protein_coding	c.661-2C>T		1|1	24	1	1|1	41	1	1|1	18	1	1|1	33	1
1	171286741	C	CT	frameshift_variant	Usp21	ENSMUSG00000053483	transcript	ENSMUST00000111306	protein_coding	c.208_209insA	p.Arg70fs	0|1	44	0.32	0|1	47	0.32	0|1	36	0.36	0|1	39	0.41
1	171289168	C	T	splice_region_variant&intron_variant	Ufc1	ENSMUSG00000062963	transcript	ENSMUST00000080001	protein_coding	c.423+3G>A		1|1	24	1	1|1	42	1	1|1	25	1	1|1	41	1
1	171290220	C	A	splice_region_variant&intron_variant	Ufc1	ENSMUSG00000062963	transcript	ENSMUST00000080001	protein_coding	c.124-4G>T		1|1	26	1	1|1	30	1	1|1	15	1	1|1	22	1
1	171330144	G	T	5_prime_UTR_premature_start_codon_gain_variant	Dedd	ENSMUSG00000013973	transcript	ENSMUST00000135150	protein_coding	c.-72G>T		1|1	13	1	1|1	28	1	1|1	14	1	1|1	11	1
1	171331589	G	T	5_prime_UTR_premature_start_codon_gain_variant	Dedd	ENSMUSG00000013973	transcript	ENSMUST00000097467	protein_coding	c.-74G>T		1|1	16	1	1|1	18	1	1|1	14	1	1|1	23	1
1	171338636	A	C	missense_variant&splice_region_variant	Nit1	ENSMUSG00000013997	transcript	ENSMUST00000111296	protein_coding	c.707T>G	p.Leu236Arg	1|1	31	1	1|1	44	1	1|1	30	1	1|1	36	1
1	171344938	G	A	missense_variant	Nit1	ENSMUSG00000013997	transcript	ENSMUST00000111295	protein_coding	c.65C>T	p.Thr22Ile	0/1	61	0.41	0/1	53	0.51	0/1	65	0.43	0/1	75	0.44
1	171356616	CAGGTAGGAAGGCCGCAGAGAAACAGAGTGATTGGATGGAGGCTTGTGGGGATCAGGACGCATTCTGAGGTCTTGTTCTCCTACCCT	C	splice_acceptor_variant&splice_donor_variant&splice_region_variant&intron_variant	Pfdn2	ENSMUSG00000006412	transcript	ENSMUST00000135941	protein_coding	c.164+1_165-1delGTAGGAAGGCCGCAGAGAAACAGAGTGATTGGATGGAGGCTTGTGGGGATCAGGACGCATTCTGAGGTCTTGTTCTCCTACCCTAG		0|1	63	0.4	0|1	53	0.21	0|1	69	0.42	0|1	82	0.32
1	171357795	C	A	missense_variant	Pfdn2	ENSMUSG00000006412	transcript	ENSMUST00000006579	protein_coding	c.278C>A	p.Pro93Gln	1|1	25	1	1|1	25	1	1|1	24	1	1|1	30	1
1	171357796	G	GAA	frameshift_variant	Pfdn2	ENSMUSG00000006412	transcript	ENSMUST00000006579	protein_coding	c.279_280insAA	p.Gly94fs	1|1	25	1	1|1	25	1	1|1	24	1	1|1	30	1
1	171357804	G	A	missense_variant	Pfdn2	ENSMUSG00000006412	transcript	ENSMUST00000006579	protein_coding	c.287G>A	p.Arg96Lys	1|1	24	1	1|1	27	1	1|1	24	1	1|1	32	1
1	171360318	T	C	missense_variant	Klhdc9	ENSMUSG00000045259	transcript	ENSMUST00000061878	protein_coding	c.344A>G	p.Glu115Gly	1|1	9	1	1|1	21	1	1|1	16	1	1|1	24	1
1	171360646	T	G	missense_variant	Klhdc9	ENSMUSG00000045259	transcript	ENSMUST00000061878	protein_coding	c.16A>C	p.Thr6Pro	1|1	23	1	1|1	31	1	1|1	18	1	1|1	33	1
1	171370132	T	A	missense_variant	Pvrl4	ENSMUSG00000006411	transcript	ENSMUST00000111286	protein_coding	c.34T>A	p.Ser12Thr	1|1	33	1	1|1	37	1	1|1	23	1	1|1	32	1
1	171402151	T	C	splice_region_variant&intron_variant	Arhgap30	ENSMUSG00000048865	transcript	ENSMUST00000056449	protein_coding	c.429-6T>C		1|1	21	1	1|1	31	1	1|1	30	1	1|1	45	1
1	171403775	TC	T	splice_region_variant&intron_variant	Arhgap30	ENSMUSG00000048865	transcript	ENSMUST00000056449	protein_coding	c.665-4delC		1|1	16	1	1|1	28	1	1|1	17	1	1|1	42	1
1	171405161	T	C	missense_variant	Arhgap30	ENSMUSG00000048865	transcript	ENSMUST00000056449	protein_coding	c.1373T>C	p.Leu458Ser	1|1	26	1	1|1	35	1	1|1	18	0.89	1|1	32	1
1	171405165	T	TCCTGGCCCTGGCCCAGGCCTTGGC	disruptive_inframe_insertion	Arhgap30	ENSMUSG00000048865	transcript	ENSMUST00000056449	protein_coding	c.1385_1386insTGGCCCAGGCCTTGGCCCTGGCCC	p.Pro462_Pro463insGlyProGlyLeuGlyProGlyPro	1|1	25	1	1|1	34	1	1|1	18	1	1|1	35	1
1	171408086	A	T	missense_variant	Arhgap30	ENSMUSG00000048865	transcript	ENSMUST00000056449	protein_coding	c.2027A>T	p.Glu676Val	1|1	28	1	1|1	33	1	1|1	7	1	1|1	30	1
1	171408430	A	G	missense_variant	Arhgap30	ENSMUSG00000048865	transcript	ENSMUST00000056449	protein_coding	c.2371A>G	p.Ser791Gly	1|1	20	1	1|1	29	1	1|1	32	1	1|1	30	1
1	171408437	C	T	missense_variant	Arhgap30	ENSMUSG00000048865	transcript	ENSMUST00000056449	protein_coding	c.2378C>T	p.Thr793Ile	1|1	20	1	1|1	31	1	1|1	32	1	1|1	29	1
1	171409082	T	G	missense_variant	Arhgap30	ENSMUSG00000048865	transcript	ENSMUST00000056449	protein_coding	c.3023T>G	p.Leu1008Arg	1|1	27	1	1|1	36	1	1|1	19	1	1|1	34	1
1	171409124	G	A	missense_variant	Arhgap30	ENSMUSG00000048865	transcript	ENSMUST00000056449	protein_coding	c.3065G>A	p.Ser1022Asn	1|1	20	1	1|1	37	1	1|1	22	1	1|1	42	1
1	171424069	A	G	splice_region_variant&intron_variant	Gm26641	ENSMUSG00000097045	transcript	ENSMUST00000181499	lincRNA	n.78-8T>C		1|1	19	1	1|1	18	1	1|1	15	1	1|1	24	1
1	171460356	T	TCCC	splice_region_variant&intron_variant	F11r	ENSMUSG00000038235	transcript	ENSMUST00000043839	protein_coding	c.62-5_62-4insCCC		1|1	20	1	1|1	32	1	1|1	36	1	1|1	34	1
1	171461183	TCC	T	splice_region_variant&intron_variant	F11r	ENSMUSG00000038235	transcript	ENSMUST00000043839	protein_coding	c.386-4_386-3delCC		1|1	13	1	1|1	28	1	1|1	30	1	1|1	25	1
1	171461193	C	G	splice_region_variant&intron_variant	F11r	ENSMUSG00000038235	transcript	ENSMUST00000043839	protein_coding	c.386-8C>G		1|1	13	1	1|1	29	1	1|1	32	1	1|1	26	1
1	171504107	A	G	missense_variant	Alyref2	ENSMUSG00000060244	transcript	ENSMUST00000081527	protein_coding	c.451A>G	p.Thr151Ala	1|1	28	1	1|1	26	1	1|1	27	1	1|1	25	1
1	171515233	G	T	missense_variant	Gm9765	ENSMUSG00000038218	transcript	ENSMUST00000043170	protein_coding	c.1G>T	p.Gly1Trp	0|1	117	0.19	0/1	116	0.17	0|1	131	0.18	0|1	145	0.27
1	171515240	C	T	missense_variant	Gm9765	ENSMUSG00000038218	transcript	ENSMUST00000043170	protein_coding	c.8C>T	p.Ala3Val	0|1	117	0.2	0/1	117	0.19	0/1	131	0.4	0/1	147	0.39
1	171515654	A	C	missense_variant	Gm9765	ENSMUSG00000038218	transcript	ENSMUST00000043170	protein_coding	c.106A>C	p.Lys36Gln	0/1	113	0.68	0/1	143	0.64	0/1	156	0.68	0/1	174	0.63
1	171515656	A	C	missense_variant	Gm9765	ENSMUSG00000038218	transcript	ENSMUST00000043170	protein_coding	c.108A>C	p.Lys36Asn	0/1	117	0.77	0/1	144	0.78	0|1	157	0.79	0/1	175	0.77
1	171515658	A	C	missense_variant	Gm9765	ENSMUSG00000038218	transcript	ENSMUST00000043170	protein_coding	c.110A>C	p.Asn37Thr	0/1	116	0.39	0/1	146	0.44	0/1	158	0.56	0/1	175	0.42
1	171515668	G	C	missense_variant	Gm9765	ENSMUSG00000038218	transcript	ENSMUST00000043170	protein_coding	c.120G>C	p.Lys40Asn	0/1	107	0.74	0/1	141	0.81	0|1	158	0.77	0/1	167	0.77
1	171515672	T	A	missense_variant	Gm9765	ENSMUSG00000038218	transcript	ENSMUST00000043170	protein_coding	c.124T>A	p.Ser42Thr	0/1	106	0.12	0/1	136	0.13	0|1	162	0.22	0/1	169	0.2
1	171515717	A	G	missense_variant	Gm9765	ENSMUSG00000038218	transcript	ENSMUST00000043170	protein_coding	c.169A>G	p.Ser57Gly	0/1	108	0.65	0/1	159	0.68	0/1	171	0.64	0/1	180	0.61
1	171515733	G	A	missense_variant	Gm9765	ENSMUSG00000038218	transcript	ENSMUST00000043170	protein_coding	c.185G>A	p.Gly62Asp	0/1	111	0.31	0/1	168	0.32	0|1	179	0.14	0/1	190	0.31
1	171516794	A	T	splice_region_variant&intron_variant	Gm9765	ENSMUSG00000038218	transcript	ENSMUST00000043170	protein_coding	c.196-3A>T		0|1	117	0.26	0/1	94	0.1	0|1	133	0.26	0/1	137	0.1
1	171516795	G	A	splice_acceptor_variant&intron_variant	Gm9765	ENSMUSG00000038218	transcript	ENSMUST00000043170	protein_coding	c.196-2G>A		0|1	117	0.46	0/1	94	0.13	0|1	129	0.41	0/1	135	0.15
1	171516802	C	G	stop_gained	Gm9765	ENSMUSG00000038218	transcript	ENSMUST00000043170	protein_coding	c.201C>G	p.Tyr67*	0|1	108	0.44	0/1	94	0.13	0|1	121	0.39	0/1	128	0.15
1	171516836	T	G	missense_variant	Gm9765	ENSMUSG00000038218	transcript	ENSMUST00000043170	protein_coding	c.235T>G	p.Tyr79Asp	0|1	87	0.29	0/1	86	0.09	0|1	104	0.22	0/1	122	0.08
1	171516839	C	A	missense_variant	Gm9765	ENSMUSG00000038218	transcript	ENSMUST00000043170	protein_coding	c.238C>A	p.Arg80Ser	0|1	89	0.28	0/1	85	0.09	0|1	104	0.23	0/1	120	0.07
1	171516851	T	G	missense_variant	Gm9765	ENSMUSG00000038218	transcript	ENSMUST00000043170	protein_coding	c.250T>G	p.Leu84Val	0|1	83	0.77	0/1	81	0.89	0|1	98	0.79	0/1	114	0.9
1	171516909	A	C	missense_variant	Gm9765	ENSMUSG00000038218	transcript	ENSMUST00000043170	protein_coding	c.308A>C	p.Tyr103Ser	0/1	53	0.66	0/1	72	0.67	0/1	69	0.64	0/1	104	0.44
1	171516922	G	A	splice_region_variant&synonymous_variant	Gm9765	ENSMUSG00000038218	transcript	ENSMUST00000043170	protein_coding	c.321G>A	p.Glu107Glu	0/1	52	0.38	0/1	80	0.6	0/1	65	0.4	0/1	108	0.37
1	171518279	T	C	missense_variant	Itln1	ENSMUSG00000038209	transcript	ENSMUST00000043094	protein_coding	c.904A>G	p.Lys302Glu	0|1	179	0.86	0|1	186	0.82	0|1	178	0.79	0|1	245	0.88
1	171518287	C	T	missense_variant	Itln1	ENSMUSG00000038209	transcript	ENSMUST00000043094	protein_coding	c.896G>A	p.Ser299Asn	0/1	183	0.28	0/1	178	0.23	0/1	174	0.3	0/1	239	0.21
1	171518318	C	T	missense_variant	Itln1	ENSMUSG00000038209	transcript	ENSMUST00000043094	protein_coding	c.865G>A	p.Asp289Asn	0|1	193	0.84	0|1	179	0.84	0|1	179	0.81	0|1	235	0.89
1	171518320	C	G	missense_variant	Itln1	ENSMUSG00000038209	transcript	ENSMUST00000043094	protein_coding	c.863G>C	p.Trp288Ser	0/1	187	0.43	0/1	171	0.39	0/1	181	0.45	0/1	230	0.34
1	171518321	A	C	missense_variant	Itln1	ENSMUSG00000038209	transcript	ENSMUST00000043094	protein_coding	c.862T>G	p.Trp288Gly	0/1	188	0.6	0/1	173	0.57	0/1	181	0.56	0/1	231	0.51
1	171518329	G	GC	frameshift_variant	Itln1	ENSMUSG00000038209	transcript	ENSMUST00000043094	protein_coding	c.853_854insG	p.Ser285fs	0|1	183	0.38	0|1	163	0.34	0|1	189	0.3	0|1	223	0.38
1	171518330	A	C	missense_variant	Itln1	ENSMUSG00000038209	transcript	ENSMUST00000043094	protein_coding	c.853T>G	p.Ser285Ala	0/1	185	0.37	0/1	165	0.41	0/1	189	0.33	0/1	223	0.4
1	171518348	G	C	missense_variant	Itln1	ENSMUSG00000038209	transcript	ENSMUST00000043094	protein_coding	c.835C>G	p.Gln279Glu	0|1	205	0.32	0|1	164	0.32	0|1	192	0.26	0|1	237	0.31
1	171518357	T	C	missense_variant	Itln1	ENSMUSG00000038209	transcript	ENSMUST00000043094	protein_coding	c.826A>G	p.Asn276Asp	0|1	202	0.32	0|1	164	0.32	0|1	196	0.26	0|1	241	0.3
1	171518359	C	A	missense_variant	Itln1	ENSMUSG00000038209	transcript	ENSMUST00000043094	protein_coding	c.824G>T	p.Gly275Val	0|1	200	0.32	0|1	165	0.32	0|1	195	0.25	0|1	239	0.3
1	171518360	C	A	missense_variant	Itln1	ENSMUSG00000038209	transcript	ENSMUST00000043094	protein_coding	c.823G>T	p.Gly275Cys	0|1	198	0.32	0|1	165	0.32	0|1	195	0.25	0|1	237	0.3
1	171529123	G	A	missense_variant&splice_region_variant	Itln1	ENSMUSG00000038209	transcript	ENSMUST00000043094	protein_coding	c.787C>T	p.His263Tyr	0|1	112	0.32	0|1	112	0.19	0|1	157	0.17	0|1	185	0.19
1	171529146	C	T	missense_variant	Itln1	ENSMUSG00000038209	transcript	ENSMUST00000043094	protein_coding	c.764G>A	p.Arg255Lys	0/1	125	0.34	0/1	117	0.39	0/1	166	0.24	0/1	197	0.45
1	171529150	C	T	missense_variant	Itln1	ENSMUSG00000038209	transcript	ENSMUST00000043094	protein_coding	c.760G>A	p.Val254Met	0|1	131	0.22	0|1	119	0.19	0|1	171	0.18	0|1	198	0.21
1	171529223	C	A	missense_variant&splice_region_variant	Itln1	ENSMUSG00000038209	transcript	ENSMUST00000043094	protein_coding	c.687G>T	p.Arg229Ser	0|1	97	0.4	0|1	108	0.53	0|1	152	0.47	0|1	126	0.19
1	171529224	C	T	missense_variant&splice_region_variant	Itln1	ENSMUSG00000038209	transcript	ENSMUST00000043094	protein_coding	c.686G>A	p.Arg229Lys	0|1	96	0.45	0/1	109	0.55	0|1	153	0.48	0/1	122	0.31
1	171529227	G	A	splice_region_variant&intron_variant	Itln1	ENSMUSG00000038209	transcript	ENSMUST00000043094	protein_coding	c.686-3C>T		0|1	97	0.4	0|1	108	0.51	0|1	158	0.47	0|1	126	0.17
1	171529232	G	C	splice_region_variant&intron_variant	Itln1	ENSMUSG00000038209	transcript	ENSMUST00000043094	protein_coding	c.686-8C>G		0|1	96	0.41	0|1	109	0.51	0|1	155	0.46	0|1	127	0.16
1	171530496	T	C	missense_variant&splice_region_variant	Itln1	ENSMUSG00000038209	transcript	ENSMUST00000043094	protein_coding	c.683A>G	p.Gln228Arg	0/1	196	0.21	0/1	197	0.26	0/1	254	0.21	0/1	291	0.28
1	171530517	G	A	missense_variant	Itln1	ENSMUSG00000038209	transcript	ENSMUST00000043094	protein_coding	c.662C>T	p.Ser221Phe	0/1	197	0.27	0/1	177	0.21	0/1	262	0.22	0/1	285	0.21
1	171530529	C	T	missense_variant	Itln1	ENSMUSG00000038209	transcript	ENSMUST00000043094	protein_coding	c.650G>A	p.Arg217Gln	0/1	202	0.89	0/1	174	0.8	0/1	257	0.83	0/1	278	0.77
1	171530558	T	A	missense_variant	Itln1	ENSMUSG00000038209	transcript	ENSMUST00000043094	protein_coding	c.621A>T	p.Leu207Phe	0|1	129	0.09	0|1	118	0.14	0|1	198	0.16	0/1	230	0.29
1	171530595	C	T	missense_variant	Itln1	ENSMUSG00000038209	transcript	ENSMUST00000043094	protein_coding	c.584G>A	p.Gly195Glu	0/1	118	0.21	0/1	114	0.21	0/1	187	0.17	0/1	201	0.16
1	171530596	C	T	missense_variant	Itln1	ENSMUSG00000038209	transcript	ENSMUST00000043094	protein_coding	c.583G>A	p.Gly195Arg	0|1	118	0.27	0|1	114	0.35	0|1	190	0.33	0|1	204	0.29
1	171531036	T	G	missense_variant&splice_region_variant	Itln1	ENSMUSG00000038209	transcript	ENSMUST00000043094	protein_coding	c.562A>C	p.Lys188Gln	0/1	130	0.56	0/1	147	0.57	0/1	113	0.65	0/1	168	0.54
1	171531065	T	C	missense_variant	Itln1	ENSMUSG00000038209	transcript	ENSMUST00000043094	protein_coding	c.533A>G	p.His178Arg	0/1	127	0.39	0/1	152	0.37	0/1	120	0.43	0/1	182	0.33
1	171531109	C	G	missense_variant	Itln1	ENSMUSG00000038209	transcript	ENSMUST00000043094	protein_coding	c.489G>C	p.Lys163Asn	0/1	111	0.54	0/1	141	0.52	0/1	115	0.52	0/1	160	0.44
1	171531119	T	G	missense_variant	Itln1	ENSMUSG00000038209	transcript	ENSMUST00000043094	protein_coding	c.479A>C	p.Asn160Thr	0/1	107	0.46	0/1	138	0.25	0/1	114	0.39	0/1	158	0.37
1	171531133	T	G	missense_variant	Itln1	ENSMUSG00000038209	transcript	ENSMUST00000043094	protein_coding	c.465A>C	p.Lys155Asn	0/1	107	0.42	0/1	121	0.33	0/1	102	0.29	0/1	156	0.26
1	171531528	G	C	missense_variant	Itln1	ENSMUSG00000038209	transcript	ENSMUST00000043094	protein_coding	c.383C>G	p.Ala128Gly	0/1	147	0.63	0/1	149	0.51	0/1	123	0.37	0/1	177	0.51
1	171531730	T	C	missense_variant	Itln1	ENSMUSG00000038209	transcript	ENSMUST00000043094	protein_coding	c.181A>G	p.Lys61Glu	0|1	156	0.87	0/1	136	0.85	0|1	164	0.84	0|1	160	0.83
1	171531733	T	A	missense_variant	Itln1	ENSMUSG00000038209	transcript	ENSMUST00000043094	protein_coding	c.178A>T	p.Thr60Ser	0|1	162	0.21	0|1	135	0.08	0|1	166	0.21	0|1	162	0.17
1	171531735	C	T	missense_variant	Itln1	ENSMUSG00000038209	transcript	ENSMUST00000043094	protein_coding	c.176G>A	p.Arg59His	0|1	160	0.25	0/1	132	0.14	0|1	169	0.2	0/1	160	0.21
1	171533380	T	A	missense_variant	Itln1	ENSMUSG00000038209	transcript	ENSMUST00000043094	protein_coding	c.143A>T	p.His48Leu	0/1	129	0.42	0/1	129	0.43	0/1	140	0.48	0/1	140	0.44
1	171533381	G	C	missense_variant	Itln1	ENSMUSG00000038209	transcript	ENSMUST00000043094	protein_coding	c.142C>G	p.His48Asp	0/1	128	0.85	0/1	129	0.84	0/1	138	0.83	0/1	139	0.85
1	171533417	AG	A	frameshift_variant	Itln1	ENSMUSG00000038209	transcript	ENSMUST00000043094	protein_coding	c.105delC	p.Ser36fs	0|1	110	0.15	0|1	124	0.17	0|1	124	0.11	0|1	137	0.25
1	171533428	G	T	missense_variant	Itln1	ENSMUSG00000038209	transcript	ENSMUST00000043094	protein_coding	c.95C>A	p.Ser32Tyr	0|1	111	0.14	0|1	128	0.19	0|1	126	0.1	0|1	136	0.24
1	171533430	A	T	missense_variant	Itln1	ENSMUSG00000038209	transcript	ENSMUST00000043094	protein_coding	c.93T>A	p.Asn31Lys	0|1	110	0.15	0|1	121	0.2	0|1	123	0.11	0|1	135	0.24
1	171534747	G	C	splice_region_variant&intron_variant	Itln1	ENSMUSG00000038209	transcript	ENSMUST00000043094	protein_coding	c.58+7C>G		0/1	59	0.32	0/1	76	0.47	0/1	75	0.44	0/1	64	0.42
1	171534822	A	G	splice_region_variant&intron_variant	Itln1	ENSMUSG00000038209	transcript	ENSMUST00000043094	protein_coding	c.-6-5T>C		0|1	62	0.29	0|1	70	0.41	0|1	63	0.43	0|1	61	0.41
1	171559242	C	T	5_prime_UTR_premature_start_codon_gain_variant	Cd244	ENSMUSG00000004709	transcript	ENSMUST00000004829	protein_coding	c.-83C>T		0/1	140	0.11	0/1	140	0.26	0/1	117	0.23	0/1	178	0.12
1	171559250	A	T	5_prime_UTR_premature_start_codon_gain_variant	Cd244	ENSMUSG00000004709	transcript	ENSMUST00000004829	protein_coding	c.-75A>T		0/1	131	0.48	0/1	140	0.59	0/1	118	0.64	0/1	183	0.45
1	171559267	T	A	5_prime_UTR_premature_start_codon_gain_variant	Cd244	ENSMUSG00000004709	transcript	ENSMUST00000004829	protein_coding	c.-58T>A		0/1	125	0.14	0/1	133	0.23	0/1	127	0.22	0/1	184	0.12
1	171559274	C	T	5_prime_UTR_premature_start_codon_gain_variant	Cd244	ENSMUSG00000004709	transcript	ENSMUST00000004829	protein_coding	c.-51C>T		0|1	117	0.15	0|1	136	0.09	0|1	119	0.19	0|1	181	0.21
1	171559301	C	T	5_prime_UTR_premature_start_codon_gain_variant	Cd244	ENSMUSG00000004709	transcript	ENSMUST00000004829	protein_coding	c.-24C>T		0/1	108	0.47	0/1	131	0.63	0|1	118	0.63	0/1	169	0.46
1	171559341	T	G	missense_variant	Cd244	ENSMUSG00000004709	transcript	ENSMUST00000004829	protein_coding	c.17T>G	p.Val6Gly	0/1	118	0.11	0/1	132	0.25	0|1	134	0.11	0|1	184	0.09
1	171573654	G	GTTTTC	splice_region_variant&intron_variant	Cd244	ENSMUSG00000004709	transcript	ENSMUST00000004829	protein_coding	c.62-12_62-8dupCTTTT		0/1	104	0.39	0/1	90	0.33	0/1	91	0.15	0/1	137	0.34
1	171573686	C	T	missense_variant	Cd244	ENSMUSG00000004709	transcript	ENSMUST00000004829	protein_coding	c.67C>T	p.Pro23Ser	0|1	103	0.64	0|1	95	0.72	0|1	106	0.84	0|1	143	0.73
1	171573695	T	C	missense_variant	Cd244	ENSMUSG00000004709	transcript	ENSMUST00000004829	protein_coding	c.76T>C	p.Ser26Pro	0/1	96	0.33	0/1	90	0.4	0/1	101	0.33	0/1	142	0.23
1	171573707	G	A	missense_variant	Cd244	ENSMUSG00000004709	transcript	ENSMUST00000004829	protein_coding	c.88G>A	p.Val30Ile	0|1	109	0.31	0|1	101	0.27	0|1	109	0.21	0|1	144	0.22
1	171573767	T	A	missense_variant	Cd244	ENSMUSG00000004709	transcript	ENSMUST00000004829	protein_coding	c.148T>A	p.Ser50Thr	0/1	66	0.56	0/1	55	0.55	0/1	59	0.61	0/1	71	0.45
1	171573770	G	A	missense_variant	Cd244	ENSMUSG00000004709	transcript	ENSMUST00000004829	protein_coding	c.151G>A	p.Val51Ile	0/1	66	0.25	0/1	55	0.2	0/1	67	0.22	0/1	71	0.27
1	171573771	T	C	missense_variant	Cd244	ENSMUSG00000004709	transcript	ENSMUST00000004829	protein_coding	c.152T>C	p.Val51Ala	0/1	65	0.58	0/1	53	0.6	0/1	62	0.64	0/1	70	0.5
1	171573786	C	G	missense_variant	Cd244	ENSMUSG00000004709	transcript	ENSMUST00000004829	protein_coding	c.167C>G	p.Thr56Arg	0/1	69	0.68	0/1	62	0.6	0/1	70	0.68	0/1	77	0.63
1	171573789	A	T	missense_variant	Cd244	ENSMUSG00000004709	transcript	ENSMUST00000004829	protein_coding	c.170A>T	p.Glu57Val	0/1	67	0.19	0/1	63	0.22	0/1	69	0.19	0/1	79	0.19
1	171573804	G	C	missense_variant	Cd244	ENSMUSG00000004709	transcript	ENSMUST00000004829	protein_coding	c.185G>C	p.Arg62Thr	1|1	69	1	1|1	70	1	1|1	79	1	1|1	93	1
1	171573808	A	C	missense_variant	Cd244	ENSMUSG00000004709	transcript	ENSMUST00000004829	protein_coding	c.189A>C	p.Lys63Asn	0/1	70	0.49	0/1	67	0.64	0/1	82	0.51	0/1	94	0.61
1	171573810	T	C	missense_variant	Cd244	ENSMUSG00000004709	transcript	ENSMUST00000004829	protein_coding	c.191T>C	p.Ile64Thr	0/1	70	0.49	0/1	67	0.64	0/1	82	0.51	0/1	96	0.61
1	171573825	G	C	missense_variant	Cd244	ENSMUSG00000004709	transcript	ENSMUST00000004829	protein_coding	c.206G>C	p.Trp69Ser	0/1	70	0.2	0/1	71	0.25	0/1	82	0.17	0/1	97	0.22
1	171573827	T	TGTA	disruptive_inframe_insertion	Cd244	ENSMUSG00000004709	transcript	ENSMUST00000004829	protein_coding	c.208_209insGTA	p.Tyr70delinsCysAsn	0/1	70	0.2	0/1	71	0.25	0/1	80	0.19	0/1	97	0.22
1	171573828	A	G	missense_variant	Cd244	ENSMUSG00000004709	transcript	ENSMUST00000004829	protein_coding	c.209A>G	p.Tyr70Cys	0/1	69	0.8	0/1	71	0.75	0/1	81	0.81	0/1	97	0.78
1	171573830	A	AAC	frameshift_variant	Cd244	ENSMUSG00000004709	transcript	ENSMUST00000004829	protein_coding	c.212_213insCA	p.Asp72fs	0/1	67	0.13	0/1	70	0.1	0/1	82	0.28	0/1	98	0.29
1	171573832	T	A	missense_variant	Cd244	ENSMUSG00000004709	transcript	ENSMUST00000004829	protein_coding	c.213T>A	p.Asn71Lys	0/1	68	0.15	0/1	69	0.1	0/1	80	0.29	0/1	98	0.29
1	171573833	G	A	missense_variant	Cd244	ENSMUSG00000004709	transcript	ENSMUST00000004829	protein_coding	c.214G>A	p.Asp72Asn	0/1	69	0.36	0/1	69	0.55	0/1	80	0.21	0/1	98	0.26
1	171573835	TGGTC	T	frameshift_variant	Cd244	ENSMUSG00000004709	transcript	ENSMUST00000004829	protein_coding	c.217_220delGGTC	p.Gly73fs	0/1	67	0.15	0/1	73	0.11	0/1	80	0.29	0/1	100	0.27
1	171573843	G	T	missense_variant	Cd244	ENSMUSG00000004709	transcript	ENSMUST00000004829	protein_coding	c.224G>T	p.Ser75Ile	0/1	64	0.14	0/1	73	0.11	0/1	80	0.31	0/1	98	0.28
1	171573844	T	A	missense_variant	Cd244	ENSMUSG00000004709	transcript	ENSMUST00000004829	protein_coding	c.225T>A	p.Ser75Arg	0/1	64	0.39	0/1	75	0.6	0/1	80	0.3	0/1	98	0.35
1	171573847	G	C	missense_variant	Cd244	ENSMUSG00000004709	transcript	ENSMUST00000004829	protein_coding	c.228G>C	p.Trp76Cys	0/1	67	0.55	0/1	78	0.72	0/1	81	0.62	0/1	99	0.62
1	171573848	T	C	missense_variant	Cd244	ENSMUSG00000004709	transcript	ENSMUST00000004829	protein_coding	c.229T>C	p.Ser77Pro	0/1	67	0.16	0/1	79	0.14	0/1	81	0.31	0/1	99	0.27
1	171573852	A	C	missense_variant	Cd244	ENSMUSG00000004709	transcript	ENSMUST00000004829	protein_coding	c.233A>C	p.Asn78Thr	0/1	68	0.54	0/1	80	0.7	0/1	84	0.62	0/1	101	0.59
1	171573857	T	G	missense_variant	Cd244	ENSMUSG00000004709	transcript	ENSMUST00000004829	protein_coding	c.238T>G	p.Ser80Ala	0/1	67	0.55	0/1	81	0.7	0/1	83	0.64	0/1	105	0.59
1	171573858	C	T	missense_variant	Cd244	ENSMUSG00000004709	transcript	ENSMUST00000004829	protein_coding	c.239C>T	p.Ser80Phe	0/1	68	0.16	0/1	80	0.21	0/1	83	0.17	0/1	108	0.19
1	171573861	T	C	missense_variant	Cd244	ENSMUSG00000004709	transcript	ENSMUST00000004829	protein_coding	c.242T>C	p.Phe81Ser	0/1	70	0.57	0/1	80	0.71	0/1	86	0.67	0/1	114	0.58
1	171573873	A	T	missense_variant	Cd244	ENSMUSG00000004709	transcript	ENSMUST00000004829	protein_coding	c.254A>T	p.Tyr85Phe	0/1	73	0.19	0/1	81	0.16	0/1	98	0.34	0/1	121	0.29
1	171573884	T	G	missense_variant	Cd244	ENSMUSG00000004709	transcript	ENSMUST00000004829	protein_coding	c.265T>G	p.Tyr89Asp	0/1	72	0.65	0/1	81	0.56	0/1	101	0.47	0/1	129	0.5
1	171573886	TG	T	frameshift_variant	Cd244	ENSMUSG00000004709	transcript	ENSMUST00000004829	protein_coding	c.271delG	p.Asp91fs	0/1	70	0.21	0/1	80	0.28	0/1	100	0.14	0/1	129	0.11
1	171573888	G	A	missense_variant	Cd244	ENSMUSG00000004709	transcript	ENSMUST00000004829	protein_coding	c.269G>A	p.Gly90Glu	0/1	70	0.43	0/1	79	0.29	0/1	98	0.32	0/1	131	0.38
1	171573896	G	T	missense_variant	Cd244	ENSMUSG00000004709	transcript	ENSMUST00000004829	protein_coding	c.277G>T	p.Ala93Ser	0/1	70	0.21	0/1	80	0.26	0/1	100	0.14	0/1	131	0.15
1	171573897	C	A	missense_variant	Cd244	ENSMUSG00000004709	transcript	ENSMUST00000004829	protein_coding	c.278C>A	p.Ala93Asp	0/1	69	0.22	0/1	80	0.26	0/1	100	0.14	0/1	133	0.14
1	171573902	A	T	missense_variant	Cd244	ENSMUSG00000004709	transcript	ENSMUST00000004829	protein_coding	c.283A>T	p.Ser95Cys	0/1	65	0.22	0/1	79	0.25	0/1	102	0.14	0/1	134	0.15
1	171573917	A	C	missense_variant	Cd244	ENSMUSG00000004709	transcript	ENSMUST00000004829	protein_coding	c.298A>C	p.Lys100Gln	0/1	58	0.55	0/1	80	0.41	0/1	97	0.39	0/1	128	0.5
1	171573926	G	A	missense_variant	Cd244	ENSMUSG00000004709	transcript	ENSMUST00000004829	protein_coding	c.307G>A	p.Asp103Asn	0/1	63	0.25	0/1	98	0.54	0/1	92	0.45	0/1	134	0.37
1	171573950	A	C	missense_variant	Cd244	ENSMUSG00000004709	transcript	ENSMUST00000004829	protein_coding	c.331A>C	p.Ile111Leu	0/1	96	0.2	0/1	112	0.17	0/1	140	0.2	0/1	168	0.18
1	171573954	C	T	missense_variant	Cd244	ENSMUSG00000004709	transcript	ENSMUST00000004829	protein_coding	c.335C>T	p.Thr112Ile	0/1	96	0.26	0/1	109	0.17	0/1	144	0.23	0/1	169	0.3
1	171573956	A	T	missense_variant	Cd244	ENSMUSG00000004709	transcript	ENSMUST00000004829	protein_coding	c.337A>T	p.Asn113Tyr	0/1	94	0.39	0/1	110	0.48	0/1	143	0.33	0/1	169	0.33
1	171573960	C	G	missense_variant	Cd244	ENSMUSG00000004709	transcript	ENSMUST00000004829	protein_coding	c.341C>G	p.Thr114Arg	0/1	95	0.21	0/1	111	0.18	0/1	138	0.21	0/1	170	0.19
1	171573962	G	A	missense_variant	Cd244	ENSMUSG00000004709	transcript	ENSMUST00000004829	protein_coding	c.343G>A	p.Gly115Ser	0/1	96	0.4	0/1	114	0.49	0/1	138	0.36	0/1	168	0.33
1	171573963	G	A	missense_variant	Cd244	ENSMUSG00000004709	transcript	ENSMUST00000004829	protein_coding	c.344G>A	p.Gly115Asp	0/1	95	0.66	0/1	113	0.65	0/1	140	0.56	0/1	170	0.63
1	171573965	G	A	missense_variant	Cd244	ENSMUSG00000004709	transcript	ENSMUST00000004829	protein_coding	c.346G>A	p.Gly116Arg	0/1	95	0.19	0/1	113	0.19	0/1	135	0.28	0/1	169	0.21
1	171573969	A	C	missense_variant	Cd244	ENSMUSG00000004709	transcript	ENSMUST00000004829	protein_coding	c.350A>C	p.Lys117Thr	0/1	99	0.55	0/1	114	0.59	0/1	137	0.48	0/1	172	0.49
1	171573972	T	C	missense_variant	Cd244	ENSMUSG00000004709	transcript	ENSMUST00000004829	protein_coding	c.353T>C	p.Val118Ala	0/1	101	0.19	0/1	119	0.22	0/1	139	0.29	0/1	169	0.21
1	171573978	A	C	missense_variant	Cd244	ENSMUSG00000004709	transcript	ENSMUST00000004829	protein_coding	c.359A>C	p.Asn120Thr	0/1	99	0.79	0/1	124	0.8	0/1	133	0.7	0/1	169	0.8
1	171573992	C	A	missense_variant	Cd244	ENSMUSG00000004709	transcript	ENSMUST00000004829	protein_coding	c.373C>A	p.Leu125Ile	0/1	104	0.49	0/1	121	0.61	0/1	141	0.5	0/1	176	0.5
1	171574001	C	T	missense_variant	Cd244	ENSMUSG00000004709	transcript	ENSMUST00000004829	protein_coding	c.382C>T	p.Leu128Phe	0/1	106	0.28	0/1	118	0.42	0/1	142	0.21	0/1	175	0.3
1	171574007	G	A	splice_region_variant&intron_variant	Cd244	ENSMUSG00000004709	transcript	ENSMUST00000004829	protein_coding	c.385+3G>A		0/1	105	0.21	0/1	120	0.28	0/1	141	0.12	0/1	172	0.14
1	171574110	A	C	missense_variant	Cd244	ENSMUSG00000004709	transcript	ENSMUST00000004829	protein_coding	c.403A>C	p.Asn135His	0/1	108	0.73	0/1	134	0.81	0/1	129	0.72	0/1	138	0.77
1	171574173	G	T	missense_variant	Cd244	ENSMUSG00000004709	transcript	ENSMUST00000004829	protein_coding	c.466G>T	p.Val156Leu	0/1	113	0.17	0/1	122	0.18	0/1	113	0.12	0/1	130	0.23
1	171574176	A	C	missense_variant	Cd244	ENSMUSG00000004709	transcript	ENSMUST00000004829	protein_coding	c.469A>C	p.Thr157Pro	1|1	110	1	1|1	119	1	1|1	116	1	1|1	130	1
1	171574180	A	G	missense_variant	Cd244	ENSMUSG00000004709	transcript	ENSMUST00000004829	protein_coding	c.473A>G	p.Lys158Arg	0/1	109	0.17	0/1	110	0.18	0/1	116	0.11	0/1	132	0.22
1	171574185	G	A	missense_variant	Cd244	ENSMUSG00000004709	transcript	ENSMUST00000004829	protein_coding	c.478G>A	p.Asp160Asn	0/1	104	0.49	0/1	109	0.21	0/1	112	0.56	0/1	123	0.55
1	171574252	G	T	missense_variant	Cd244	ENSMUSG00000004709	transcript	ENSMUST00000004829	protein_coding	c.545G>T	p.Trp182Leu	0/1	107	0.18	0/1	110	0.2	0/1	103	0.15	0/1	139	0.15
1	171574260	C	G	missense_variant	Cd244	ENSMUSG00000004709	transcript	ENSMUST00000004829	protein_coding	c.553C>G	p.Gln185Glu	0/1	107	0.16	0/1	113	0.2	0/1	101	0.15	0/1	142	0.15
1	171574264	T	C	missense_variant	Cd244	ENSMUSG00000004709	transcript	ENSMUST00000004829	protein_coding	c.557T>C	p.Ile186Thr	1|1	105	1	1|1	114	1	1|1	101	1	1|1	141	1
1	171574270	C	T	missense_variant	Cd244	ENSMUSG00000004709	transcript	ENSMUST00000004829	protein_coding	c.563C>T	p.Ala188Val	0/1	104	0.16	0/1	116	0.22	0/1	98	0.36	0/1	143	0.25
1	171574272	A	T	missense_variant	Cd244	ENSMUSG00000004709	transcript	ENSMUST00000004829	protein_coding	c.565A>T	p.Ser189Cys	0/1	103	0.18	0/1	118	0.2	0/1	100	0.14	0/1	145	0.15
1	171574281	C	T	missense_variant	Cd244	ENSMUSG00000004709	transcript	ENSMUST00000004829	protein_coding	c.574C>T	p.His192Tyr	0/1	106	0.15	0/1	121	0.17	0/1	100	0.35	0/1	147	0.22
1	171574297	A	G	missense_variant	Cd244	ENSMUSG00000004709	transcript	ENSMUST00000004829	protein_coding	c.590A>G	p.Asn197Ser	0/1	104	0.12	0/1	120	0.19	0/1	99	0.38	0/1	154	0.2
1	171574336	A	T	missense_variant	Cd244	ENSMUSG00000004709	transcript	ENSMUST00000004829	protein_coding	c.629A>T	p.Asn210Ile	0/1	102	0.17	0/1	128	0.2	0/1	101	0.16	0/1	156	0.13
1	171574363	C	A	missense_variant	Cd244	ENSMUSG00000004709	transcript	ENSMUST00000004829	protein_coding	c.656C>A	p.Pro219His	0|1	84	0.29	0/1	111	0.25	0/1	100	0.25	0|1	141	0.24
1	171574366	C	T	missense_variant&splice_region_variant	Cd244	ENSMUSG00000004709	transcript	ENSMUST00000004829	protein_coding	c.659C>T	p.Ser220Leu	1|1	85	1	1|1	116	1	1|1	100	0.96	1|1	148	1
1	171574375	G	A	splice_region_variant&intron_variant	Cd244	ENSMUSG00000004709	transcript	ENSMUST00000004829	protein_coding	c.661+7G>A		0|1	85	0.59	0/1	113	0.44	0/1	104	0.41	0|1	144	0.51
1	171577239	T	C	splice_region_variant&intron_variant	Cd244	ENSMUSG00000004709	transcript	ENSMUST00000004829	protein_coding	c.662-4T>C		0/1	95	0.72	0/1	96	0.75	0/1	86	0.66	0/1	111	0.7
1	171577244	T	A	missense_variant&splice_region_variant	Cd244	ENSMUSG00000004709	transcript	ENSMUST00000004829	protein_coding	c.663T>A	p.Asn221Lys	0/1	93	0.73	0/1	96	0.75	0/1	84	0.67	0/1	111	0.69
1	171577264	G	T	missense_variant	Cd244	ENSMUSG00000004709	transcript	ENSMUST00000004829	protein_coding	c.683G>T	p.Gly228Val	0/1	92	0.71	0/1	104	0.75	0/1	84	0.67	0/1	114	0.69
1	171577266	G	A	missense_variant	Cd244	ENSMUSG00000004709	transcript	ENSMUST00000004829	protein_coding	c.685G>A	p.Val229Met	0/1	91	0.26	0/1	104	0.21	0/1	83	0.33	0/1	114	0.12
1	171577275	G	A	missense_variant	Cd244	ENSMUSG00000004709	transcript	ENSMUST00000004829	protein_coding	c.694G>A	p.Val232Met	0/1	91	0.31	0/1	108	0.23	0/1	87	0.2	0/1	116	0.3
1	171577282	T	C	missense_variant	Cd244	ENSMUSG00000004709	transcript	ENSMUST00000004829	protein_coding	c.701T>C	p.Leu234Pro	0/1	87	0.71	0/1	114	0.75	0/1	90	0.66	0/1	122	0.75
1	171577287	ACATT	A	frameshift_variant	Cd244	ENSMUSG00000004709	transcript	ENSMUST00000004829	protein_coding	c.707_710delCATT	p.Thr236fs	0/1	91	0.26	0/1	117	0.22	0/1	95	0.29	0/1	128	0.16
1	171577292	A	AACGC	frameshift_variant	Cd244	ENSMUSG00000004709	transcript	ENSMUST00000004829	protein_coding	c.711_712insACGC	p.Phe238fs	0/1	88	0.27	0/1	114	0.23	0/1	93	0.29	0/1	125	0.17
1	171577347	C	T	stop_gained&splice_region_variant	Cd244	ENSMUSG00000004709	transcript	ENSMUST00000004829	protein_coding	c.766C>T	p.Gln256*	0/1	99	0.27	0/1	105	0.3	0|1	108	0.26	0/1	152	0.27
1	171577354	A	T	splice_region_variant&intron_variant	Cd244	ENSMUSG00000004709	transcript	ENSMUST00000004829	protein_coding	c.766+7A>T		0/1	92	0.26	0/1	104	0.26	0/1	107	0.26	0/1	156	0.26
1	171577839	C	T	missense_variant	Cd244	ENSMUSG00000004709	transcript	ENSMUST00000004829	protein_coding	c.791C>T	p.Thr264Ile	0|1	94	0.31	0|1	101	0.15	0|1	83	0.27	0/1	135	0.29
1	171577853	G	A	missense_variant	Cd244	ENSMUSG00000004709	transcript	ENSMUST00000004829	protein_coding	c.805G>A	p.Val269Ile	0|1	95	0.33	0|1	106	0.1	0|1	82	0.26	0/1	136	0.26
1	171577917	C	A	missense_variant	Cd244	ENSMUSG00000004709	transcript	ENSMUST00000004829	protein_coding	c.869C>A	p.Ala290Asp	0|1	89	0.27	0|1	106	0.61	0|1	112	0.59	0/1	117	0.42
1	171577922	C	G	missense_variant	Cd244	ENSMUSG00000004709	transcript	ENSMUST00000004829	protein_coding	c.874C>G	p.Gln292Glu	0|1	91	0.34	0|1	105	0.08	0|1	115	0.21	0/1	111	0.3
1	171577932	G	A	missense_variant	Cd244	ENSMUSG00000004709	transcript	ENSMUST00000004829	protein_coding	c.884G>A	p.Gly295Glu	0/1	90	0.43	0|1	99	0.29	0/1	113	0.19	0/1	102	0.29
1	171579092	A	G	splice_region_variant&intron_variant	Cd244	ENSMUSG00000004709	transcript	ENSMUST00000004829	protein_coding	c.922-7A>G		0/1	68	0.65	0/1	62	0.52	0/1	83	0.69	0/1	96	0.65
1	171579101	G	C	splice_region_variant&synonymous_variant	Cd244	ENSMUSG00000004709	transcript	ENSMUST00000004829	protein_coding	c.924G>C	p.Val308Val	0/1	70	0.16	0/1	67	0.24	0/1	89	0.11	0/1	99	0.23
1	171579111	T	A	missense_variant	Cd244	ENSMUSG00000004709	transcript	ENSMUST00000004829	protein_coding	c.934T>A	p.Leu312Met	0/1	81	0.73	0/1	71	0.59	0/1	96	0.71	0/1	98	0.68
1	171579117	C	G	missense_variant	Cd244	ENSMUSG00000004709	transcript	ENSMUST00000004829	protein_coding	c.940C>G	p.Gln314Glu	0/1	88	0.72	0/1	78	0.62	0/1	101	0.71	0/1	104	0.71
1	171579120	C	A	missense_variant	Cd244	ENSMUSG00000004709	transcript	ENSMUST00000004829	protein_coding	c.943C>A	p.Gln315Lys	0/1	95	0.26	0/1	78	0.09	0/1	101	0.33	0/1	105	0.33
1	171579121	A	C	missense_variant	Cd244	ENSMUSG00000004709	transcript	ENSMUST00000004829	protein_coding	c.944A>C	p.Gln315Pro	0/1	95	0.46	0/1	77	0.53	0/1	100	0.29	0/1	103	0.28
1	171579124	C	A	missense_variant	Cd244	ENSMUSG00000004709	transcript	ENSMUST00000004829	protein_coding	c.947C>A	p.Thr316Asn	1|1	97	1	1|1	83	1	1|1	106	1	1|1	103	1
1	171579127	T	C	missense_variant	Cd244	ENSMUSG00000004709	transcript	ENSMUST00000004829	protein_coding	c.950T>C	p.Phe317Ser	1|1	102	1	1|1	86	0.97	1|1	107	0.92	1|1	106	0.92
1	171579129	C	A	missense_variant	Cd244	ENSMUSG00000004709	transcript	ENSMUST00000004829	protein_coding	c.952C>A	p.Pro318Thr	0/1	104	0.26	1|1	87	0.08	0/1	110	0.34	0/1	113	0.33
1	171579144	A	G	missense_variant	Cd244	ENSMUSG00000004709	transcript	ENSMUST00000004829	protein_coding	c.967A>G	p.Thr323Ala	0/1	109	0.27	1|1	99	0.11	0/1	120	0.3	0/1	133	0.34
1	171579163	A	C	missense_variant	Cd244	ENSMUSG00000004709	transcript	ENSMUST00000004829	protein_coding	c.986A>C	p.Gln329Pro	0/1	113	0.27	1|1	110	0.15	0/1	119	0.29	0/1	158	0.3
1	171579174	A	C	splice_region_variant&intron_variant	Cd244	ENSMUSG00000004709	transcript	ENSMUST00000004829	protein_coding	c.993+4A>C		0/1	113	0.87	1|1	116	0.72	0/1	126	0.81	0/1	155	0.73
1	171580751	T	C	splice_region_variant&intron_variant	Cd244	ENSMUSG00000004709	transcript	ENSMUST00000004829	protein_coding	c.994-7T>C		1|1	91	1	1|1	92	1	1|1	77	1	1|1	88	1
1	171580762	C	T	missense_variant	Cd244	ENSMUSG00000004709	transcript	ENSMUST00000004829	protein_coding	c.998C>T	p.Ser333Phe	0/1	108	0.5	1|1	95	0.49	0/1	85	0.45	0/1	88	0.38
1	171580764	G	T	missense_variant	Cd244	ENSMUSG00000004709	transcript	ENSMUST00000004829	protein_coding	c.1000G>T	p.Asp334Tyr	0/1	108	0.33	1|1	96	0.24	0/1	85	0.39	0/1	89	0.31
1	171580776	C	G	missense_variant	Cd244	ENSMUSG00000004709	transcript	ENSMUST00000004829	protein_coding	c.1012C>G	p.Gln338Glu	0/1	106	0.33	1|1	97	0.24	0/1	87	0.37	0/1	89	0.29
1	171580782	A	T	stop_gained	Cd244	ENSMUSG00000004709	transcript	ENSMUST00000004829	protein_coding	c.1018A>T	p.Lys340*	0/1	104	0.18	1|1	94	0.27	0/1	84	0.18	0/1	88	0.24
1	171580786	G	A	missense_variant	Cd244	ENSMUSG00000004709	transcript	ENSMUST00000004829	protein_coding	c.1022G>A	p.Cys341Tyr	0/1	104	0.29	1|1	97	0.23	0/1	79	0.34	0/1	89	0.29
1	171581674	C	T	missense_variant	Cd244	ENSMUSG00000004709	transcript	ENSMUST00000004829	protein_coding	c.1088C>T	p.Ser363Phe	0|1	113	0.23	1|1	115	0.26	0|1	110	0.3	0|1	167	0.28
1	171581680	G	A	missense_variant	Cd244	ENSMUSG00000004709	transcript	ENSMUST00000004829	protein_coding	c.1094G>A	p.Ser365Asn	0|1	109	0.23	1|1	109	0.28	0|1	113	0.32	0|1	163	0.28
1	171581689	T	A	missense_variant	Cd244	ENSMUSG00000004709	transcript	ENSMUST00000004829	protein_coding	c.1103T>A	p.Val368Glu	0/1	103	0.25	1|1	113	0.27	0/1	107	0.21	0/1	162	0.19
1	171581697	G	T	stop_gained&splice_region_variant	Cd244	ENSMUSG00000004709	transcript	ENSMUST00000004829	protein_coding	c.1111G>T	p.Glu371*	0/1	99	0.23	1|1	112	0.28	0/1	107	0.33	0/1	157	0.29
1	171581704	G	A	splice_region_variant&intron_variant	Cd244	ENSMUSG00000004709	transcript	ENSMUST00000004829	protein_coding	c.1113+5G>A		0/1	103	0.25	1|1	112	0.28	0/1	110	0.23	0/1	155	0.2
1	171588623	A	AT	splice_region_variant	Ly9	ENSMUSG00000004707	transcript	ENSMUST00000068878	protein_coding	c.*436dupA		1|1	18	1	1|1	15	1	1|1	25	1	1|1	24	1
1	171593907	C	T	missense_variant	Ly9	ENSMUSG00000004707	transcript	ENSMUST00000068878	protein_coding	c.1775G>A	p.Gly592Glu	1|1	19	1	1|1	30	1	1|1	34	1	1|1	37	1
1	171594032	C	A	missense_variant	Ly9	ENSMUSG00000004707	transcript	ENSMUST00000068878	protein_coding	c.1650G>T	p.Met550Ile	1|1	20	1	1|1	21	1	1|1	25	1	1|1	29	1
1	171599857	C	T	missense_variant	Ly9	ENSMUSG00000004707	transcript	ENSMUST00000068878	protein_coding	c.1129G>A	p.Glu377Lys	1|1	22	1	1|1	19	1	1|1	17	1	1|1	27	1
1	171599888	C	G	missense_variant	Ly9	ENSMUSG00000004707	transcript	ENSMUST00000068878	protein_coding	c.1098G>C	p.Lys366Asn	1|1	24	1	1|1	20	1	1|1	23	1	1|1	30	1
1	171600506	A	G	splice_region_variant&non_coding_transcript_exon_variant	Ly9	ENSMUSG00000004707	transcript	ENSMUST00000146596	retained_intron	n.1582T>C		1|1	18	1	1|1	26	1	1|1	21	1	1|1	29	1
1	171602066	AG	A	splice_region_variant&intron_variant	Ly9	ENSMUSG00000004707	transcript	ENSMUST00000068878	protein_coding	c.455-5delC		1|1	26	1	1|1	23	1	1|1	18	1	1|1	34	1
1	171605028	A	G	missense_variant	Ly9	ENSMUSG00000004707	transcript	ENSMUST00000068878	protein_coding	c.416T>C	p.Ile139Thr	1|1	19	1	1|1	29	1	1|1	32	1	1|1	42	1
1	171605056	G	A	missense_variant	Ly9	ENSMUSG00000004707	transcript	ENSMUST00000068878	protein_coding	c.388C>T	p.His130Tyr	1|1	20	1	1|1	25	1	1|1	29	1	1|1	31	1
1	171605172	A	G	missense_variant	Ly9	ENSMUSG00000004707	transcript	ENSMUST00000068878	protein_coding	c.272T>C	p.Phe91Ser	1|1	13	1	1|1	31	1	1|1	21	1	1|1	19	1
1	171605208	A	G	missense_variant	Ly9	ENSMUSG00000004707	transcript	ENSMUST00000068878	protein_coding	c.236T>C	p.Ile79Thr	1|1	15	1	1|1	34	1	1|1	22	1	1|1	27	1
1	171607284	C	T	missense_variant	Ly9	ENSMUSG00000004707	transcript	ENSMUST00000068878	protein_coding	c.40G>A	p.Gly14Ser	1|1	33	1	1|1	19	1	1|1	23	1	1|1	29	1
1	171638669	C	T	missense_variant	Slamf7	ENSMUSG00000038179	transcript	ENSMUST00000111276	protein_coding	c.757G>A	p.Gly253Arg	1|1	21	1	1|1	17	1	1|1	23	1	1|1	33	1
1	171638683	A	G	missense_variant	Slamf7	ENSMUSG00000038179	transcript	ENSMUST00000111276	protein_coding	c.743T>C	p.Met248Thr	1|1	21	1	1|1	18	1	1|1	22	1	1|1	32	1
1	171682071	C	T	5_prime_UTR_premature_start_codon_gain_variant	Cd48	ENSMUSG00000015355	transcript	ENSMUST00000068584	protein_coding	c.-23C>T		1|1	14	1	1|1	23	1	1|1	24	1	1|1	23	1
1	171682104	T	G	missense_variant	Cd48	ENSMUSG00000015355	transcript	ENSMUST00000068584	protein_coding	c.11T>G	p.Ile4Arg	1|1	18	1	1|1	17	1	1|1	25	1	1|1	21	1
1	171695858	A	G	missense_variant	Cd48	ENSMUSG00000015355	transcript	ENSMUST00000068584	protein_coding	c.268A>G	p.Asn90Asp	1|1	30	1	1|1	15	1	1|1	30	1	1|1	33	1
1	171695867	C	G	missense_variant	Cd48	ENSMUSG00000015355	transcript	ENSMUST00000068584	protein_coding	c.277C>G	p.Leu93Val	0|1	28	0.32	1|1	12	0.33	0/1	30	0.52	0|1	30	0.37
1	171777076	C	T	splice_region_variant&intron_variant	Slamf1	ENSMUSG00000015316	transcript	ENSMUST00000015460	protein_coding	c.419-6C>T		1|1	26	1	1|1	36	1	1|1	13	1	1|1	25	1
1	171839800	G	T	splice_donor_variant&intron_variant	Cd84	ENSMUSG00000038147	transcript	ENSMUST00000155802	protein_coding	c.-79+2G>T		1|1	22	1	1|1	20	1	1|1	29	1	1|1	25	1
1	171839805	G	T	splice_region_variant&intron_variant	Cd84	ENSMUSG00000038147	transcript	ENSMUST00000155802	protein_coding	c.-79+7G>T		1|1	22	1	1|1	21	1	1|1	28	1	1|1	26	1
1	171839806	G	C	splice_region_variant&intron_variant	Cd84	ENSMUSG00000038147	transcript	ENSMUST00000155802	protein_coding	c.-79+8G>C		1|1	22	1	1|1	21	1	1|1	28	1	1|1	25	1
1	171851835	G	A	missense_variant	Cd84	ENSMUSG00000038147	transcript	ENSMUST00000042302	protein_coding	c.79G>A	p.Val27Met	1|1	22	1	1|1	34	1	1|1	25	1	1|1	32	1
1	171885586	A	G	missense_variant	Cd84	ENSMUSG00000038147	transcript	ENSMUST00000042302	protein_coding	c.877A>G	p.Lys293Glu	1|1	23	1	1|1	15	1	1|1	26	1	1|1	32	1
1	171896415	A	G	missense_variant	Gm10521	ENSMUSG00000073492	transcript	ENSMUST00000097466	protein_coding	c.292A>G	p.Thr98Ala	1|1	25	1	1|1	22	1	1|1	27	1	1|1	39	1
1	171896488	G	A	missense_variant	Gm10521	ENSMUSG00000073492	transcript	ENSMUST00000097466	protein_coding	c.365G>A	p.Gly122Glu	1|1	36	1	1|1	25	1	1|1	35	1	1|1	33	1
1	171896489	A	AC	frameshift_variant	Gm10521	ENSMUSG00000073492	transcript	ENSMUST00000097466	protein_coding	c.370dupC	p.Leu124fs	1|1	36	1	1|1	25	1	1|1	35	1	1|1	33	1
1	171896499	A	G	missense_variant	Gm10521	ENSMUSG00000073492	transcript	ENSMUST00000097466	protein_coding	c.376A>G	p.Met126Val	1|1	35	1	1|1	21	1	1|1	32	1	1|1	29	1
1	171938123	T	C	splice_region_variant&intron_variant	Slamf6	ENSMUSG00000015314	transcript	ENSMUST00000171330	protein_coding	c.805+8T>C		1|1	25	1	1|1	26	1	1|1	34	1	1|1	33	1
1	171941593	TTTTGTTTG	T	splice_region_variant&intron_variant	Slamf6	ENSMUSG00000015314	transcript	ENSMUST00000171330	protein_coding	c.910-12_910-5delGTTTGTTT		1|1	14	1	1|1	26	1	1|1	24	1	1|1	18	1
1	171942580	C	T	splice_region_variant&synonymous_variant	Slamf6	ENSMUSG00000015314	transcript	ENSMUST00000171330	protein_coding	c.984C>T	p.Ala328Ala	1|1	30	1	1|1	23	1	1|1	31	1	1|1	34	1
1	172004870	A	G	splice_region_variant&intron_variant	Vangl2	ENSMUSG00000026556	transcript	ENSMUST00000111264	protein_coding	c.1426-8T>C		1|1	24	1	1|1	30	1	1|1	24	1	1|1	26	1
1	172008921	G	C	splice_region_variant&intron_variant	Vangl2	ENSMUSG00000026556	transcript	ENSMUST00000111264	protein_coding	c.801-3C>G		1|1	9	1	1|1	33	1	1|1	28	1	1|1	24	1
1	172057288	TAGA	T	splice_region_variant	Nhlh1	ENSMUSG00000051251	transcript	ENSMUST00000059794	protein_coding	c.-176_-174delTCT		1|1	29	1	1|1	37	1	1|1	27	1	1|1	29	1
1	172066763	C	T	missense_variant	Ncstn	ENSMUSG00000003458	transcript	ENSMUST00000003550	protein_coding	c.2038G>A	p.Val680Ile	1|1	32	1	1|1	40	1	1|1	30	1	1|1	32	1
1	172066768	G	A	missense_variant	Ncstn	ENSMUSG00000003458	transcript	ENSMUST00000003550	protein_coding	c.2033C>T	p.Thr678Ile	1|1	28	1	1|1	39	1	1|1	28	1	1|1	31	1
1	172082621	G	A	missense_variant	Ncstn	ENSMUSG00000003458	transcript	ENSMUST00000003550	protein_coding	c.62C>T	p.Ser21Phe	1|1	21	1	1|1	17	1	1|1	20	1	1|1	26	1
1	172082890	A	G	5_prime_UTR_premature_start_codon_gain_variant	Copa	ENSMUSG00000026553	transcript	ENSMUST00000027833	protein_coding	c.-20A>G		1|1	23	1	1|1	32	1	1|1	21	1	1|1	28	1
1	172089091	C	T	splice_region_variant&intron_variant	Copa	ENSMUSG00000026553	transcript	ENSMUST00000027833	protein_coding	c.155-6C>T		1|1	31	1	1|1	24	1	1|1	23	1	1|1	43	1
1	172091246	C	T	splice_region_variant&intron_variant	Copa	ENSMUSG00000026553	transcript	ENSMUST00000027833	protein_coding	c.386+6C>T		1|1	30	1	1|1	32	1	1|1	29	1	1|1	42	1
1	172091247	C	T	splice_region_variant&intron_variant	Copa	ENSMUSG00000026553	transcript	ENSMUST00000027833	protein_coding	c.386+7C>T		1|1	30	1	1|1	32	1	1|1	29	1	1|1	42	1
1	172097787	C	T	splice_region_variant&intron_variant	Copa	ENSMUSG00000026553	transcript	ENSMUST00000027833	protein_coding	c.606+4C>T		1|1	23	1	1|1	38	1	1|1	25	1	1|1	25	1
1	172102205	T	C	splice_region_variant&intron_variant	Copa	ENSMUSG00000026553	transcript	ENSMUST00000027833	protein_coding	c.843-5T>C		1|1	19	1	1|1	23	1	1|1	17	1	1|1	33	1
1	172114732	G	GTT	splice_region_variant&intron_variant	Copa	ENSMUSG00000026553	transcript	ENSMUST00000027833	protein_coding	c.2291-9_2291-8dupTT		1|1	17	1	1|1	30	1	1|1	25	1	1|1	31	1
1	172114738	C	T	splice_region_variant&intron_variant	Copa	ENSMUSG00000026553	transcript	ENSMUST00000027833	protein_coding	c.2291-7C>T		1|1	17	1	1|1	31	1	1|1	26	1	1|1	33	1
1	172114762	T	A	missense_variant	Copa	ENSMUSG00000026553	transcript	ENSMUST00000027833	protein_coding	c.2308T>A	p.Ser770Thr	1|1	24	1	1|1	31	1	1|1	25	1	1|1	32	1
1	172115015	C	T	splice_region_variant&intron_variant	Copa	ENSMUSG00000026553	transcript	ENSMUST00000027833	protein_coding	c.2380-8C>T		1|1	26	1	1|1	26	1	1|1	25	1	1|1	32	1
1	172118968	A	G	missense_variant	Copa	ENSMUSG00000026553	transcript	ENSMUST00000027833	protein_coding	c.2978A>G	p.Asn993Ser	1|1	20	1	1|1	25	1	1|1	29	1	1|1	29	1
1	172128583	GTCTCTTGTCTCCGAAGGTGCTCTTGATGATT	G	frameshift_variant&splice_acceptor_variant&splice_region_variant&intron_variant	Pex19	ENSMUSG00000003464	transcript	ENSMUST00000075895	protein_coding	c.71-14_87delTCTTGTCTCCGAAGGTGCTCTTGATGATTTC	p.Ser24fs	1|1	13	1	1|1	16	1	1|1	22	1	1|1	21	1
1	172128723	C	T	missense_variant	Pex19	ENSMUSG00000003464	transcript	ENSMUST00000075895	protein_coding	c.163C>T	p.Pro55Ser	1|1	29	0.97	1|1	27	1	1|1	35	1	1|1	21	1
1	172129990	A	G	splice_region_variant&intron_variant	Pex19	ENSMUSG00000003464	transcript	ENSMUST00000075895	protein_coding	c.432+3A>G		1|1	29	1	1|1	31	1	1|1	30	1	1|1	35	1
1	172175485	A	G	splice_region_variant&synonymous_variant	Dcaf8	ENSMUSG00000026554	transcript	ENSMUST00000074144	protein_coding	c.849A>G	p.Leu283Leu	1|1	22	1	1|1	31	1	1|1	25	1	1|1	30	1
1	172210501	G	C	splice_region_variant&synonymous_variant	Casq1	ENSMUSG00000007122	transcript	ENSMUST00000003554	protein_coding	c.1062C>G	p.Ala354Ala	1|1	31	1	1|1	28	1	1|1	24	1	1|1	45	1
1	172213338	G	A	splice_region_variant&synonymous_variant	Casq1	ENSMUSG00000007122	transcript	ENSMUST00000003554	protein_coding	c.882C>T	p.Pro294Pro	1|1	23	1	1|1	40	1	1|1	22	1	1|1	28	1
1	172215009	C	T	splice_region_variant&intron_variant	Casq1	ENSMUSG00000007122	transcript	ENSMUST00000003554	protein_coding	c.782+3G>A		1|1	27	1	1|1	42	1	1|1	17	1	1|1	29	1
1	172239879	GA	G	splice_region_variant&intron_variant	Atp1a4	ENSMUSG00000007107	transcript	ENSMUST00000111243	protein_coding	c.1691-7delT		1|1	27	1	1|1	25	1	1|1	22	1	1|1	44	1
1	172240058	A	G	missense_variant	Atp1a4	ENSMUSG00000007107	transcript	ENSMUST00000111243	protein_coding	c.1637T>C	p.Met546Thr	1|1	27	1	1|1	36	1	1|1	22	1	1|1	32	1
1	172244100	T	C	missense_variant	Atp1a4	ENSMUSG00000007107	transcript	ENSMUST00000111243	protein_coding	c.1427A>G	p.Asn476Ser	1|1	32	1	1|1	42	1	1|1	23	1	1|1	29	1
1	172246903	G	A	splice_region_variant&intron_variant	Atp1a4	ENSMUSG00000007107	transcript	ENSMUST00000111243	protein_coding	c.785-3C>T		1|1	21	1	1|1	40	1	1|1	23	1	1|1	23	1
1	172255054	T	C	missense_variant	Atp1a4	ENSMUSG00000007107	transcript	ENSMUST00000111243	protein_coding	c.220A>G	p.Ile74Val	1|1	33	1	1|1	31	1	1|1	38	1	1|1	22	1
1	172279843	T	TA	splice_region_variant&intron_variant	Atp1a2	ENSMUSG00000007097	transcript	ENSMUST00000085913	protein_coding	c.2116-8_2116-7insT		1|1	18	1	1|1	40	1	1|1	16	1	1|1	30	1
1	172284337	C	T	missense_variant	Atp1a2	ENSMUSG00000007097	transcript	ENSMUST00000137679	protein_coding	c.1990G>A	p.Asp664Asn	1|1	23	1	1|1	39	1	1|1	17	1	1|1	24	1
1	172284346	G	A	missense_variant	Atp1a2	ENSMUSG00000007097	transcript	ENSMUST00000137679	protein_coding	c.1981C>T	p.Arg661Cys	1|1	22	1	1|1	42	1	1|1	16	1	1|1	23	1
1	172284369	A	T	missense_variant	Atp1a2	ENSMUSG00000007097	transcript	ENSMUST00000137679	protein_coding	c.1958T>A	p.Val653Glu	1|1	20	1	1|1	45	1	1|1	11	1	1|1	23	1
1	172284375	A	G	missense_variant	Atp1a2	ENSMUSG00000007097	transcript	ENSMUST00000137679	protein_coding	c.1952T>C	p.Leu651Pro	1|1	22	1	1|1	44	1	1|1	12	1	1|1	23	1
1	172284400	G	A	missense_variant	Atp1a2	ENSMUSG00000007097	transcript	ENSMUST00000137679	protein_coding	c.1927C>T	p.Pro643Ser	1|1	20	1	1|1	45	1	1|1	12	1	1|1	28	1
1	172286190	CA	C	splice_region_variant&intron_variant	Atp1a2	ENSMUSG00000007097	transcript	ENSMUST00000085913	protein_coding	c.1216+7delT		1|1	20	1	1|1	38	1	1|1	30	1	1|1	29	1
1	172316535	A	G	splice_region_variant&intron_variant	Igsf8	ENSMUSG00000038034	transcript	ENSMUST00000039506	protein_coding	c.436+7A>G		1|1	17	1	1|1	36	1	1|1	28	1	1|1	43	1
1	172317580	A	G	missense_variant	Igsf8	ENSMUSG00000038034	transcript	ENSMUST00000039506	protein_coding	c.662A>G	p.His221Arg	1|1	21	1	1|1	49	1	1|1	26	1	1|1	30	1
1	172317815	G	A	splice_region_variant&synonymous_variant	Igsf8	ENSMUSG00000038034	transcript	ENSMUST00000039506	protein_coding	c.897G>A	p.Leu299Leu	1|1	10	1	1|1	15	1	1|1	15	1	1|1	15	1
1	172318712	A	T	missense_variant	Igsf8	ENSMUSG00000038034	transcript	ENSMUST00000039506	protein_coding	c.1465A>T	p.Thr489Ser	1|1	24	1	1|1	36	1	1|1	30	1	1|1	28	1
1	172341424	A	T	5_prime_UTR_premature_start_codon_gain_variant	Kcnj10	ENSMUSG00000044708	transcript	ENSMUST00000056136	protein_coding	c.-28A>T		1|1	20	1	1|1	27	1	1|1	20	1	1|1	28	1
1	172369705	C	G	missense_variant	Kcnj10	ENSMUSG00000044708	transcript	ENSMUST00000056136	protein_coding	c.785C>G	p.Thr262Ser	1|1	27	1	1|1	37	1	1|1	25	1	1|1	31	1
1	172376693	C	T	5_prime_UTR_premature_start_codon_gain_variant	Pigm	ENSMUSG00000050229	transcript	ENSMUST00000052455	protein_coding	c.-6C>T		1|1	19	1	1|1	22	1	1|1	21	1	1|1	20	1
1	172377316	A	T	missense_variant	Pigm	ENSMUSG00000050229	transcript	ENSMUST00000052455	protein_coding	c.618A>T	p.Gln206His	1|1	16	1	1|1	16	1	1|1	24	1	1|1	26	1
1	172476174	G	A	missense_variant	Slamf9	ENSMUSG00000026548	transcript	ENSMUST00000027830	protein_coding	c.85G>A	p.Val29Ile	1|1	28	1	1|1	36	1	1|1	22	1	1|1	28	1
1	172477430	A	G	missense_variant	Slamf9	ENSMUSG00000026548	transcript	ENSMUST00000027830	protein_coding	c.610A>G	p.Ile204Val	1|1	20	1	1|1	24	1	1|1	21	1	1|1	28	1
1	172477449	G	A	missense_variant	Slamf9	ENSMUSG00000026548	transcript	ENSMUST00000027830	protein_coding	c.629G>A	p.Arg210His	1|1	18	1	1|1	26	1	1|1	21	1	1|1	28	1
1	172478072	T	C	missense_variant	Slamf9	ENSMUSG00000026548	transcript	ENSMUST00000027830	protein_coding	c.671T>C	p.Leu224Pro	1|1	23	1	1|1	37	1	1|1	37	1	1|1	29	1
1	172484869	A	G	missense_variant	Igsf9	ENSMUSG00000037995	transcript	ENSMUST00000052629	protein_coding	c.146A>G	p.His49Arg	1|1	22	1	1|1	50	1	1|1	20	1	1|1	36	1
1	172493544	A	G	missense_variant	Igsf9	ENSMUSG00000037995	transcript	ENSMUST00000052629	protein_coding	c.1162A>G	p.Asn388Asp	1|1	24	1	1|1	44	1	1|1	28	1	1|1	22	1
1	172493614	A	G	missense_variant	Igsf9	ENSMUSG00000037995	transcript	ENSMUST00000052629	protein_coding	c.1232A>G	p.Gln411Arg	1|1	14	1	1|1	45	1	1|1	29	1	1|1	25	1
1	172496955	C	G	missense_variant	Igsf9	ENSMUSG00000037995	transcript	ENSMUST00000052629	protein_coding	c.2439C>G	p.Ser813Arg	0/1	21	0.62	0/1	38	0.53	0/1	19	0.58	0/1	32	0.53
1	172497127	T	C	missense_variant	Igsf9	ENSMUSG00000037995	transcript	ENSMUST00000052629	protein_coding	c.2611T>C	p.Ser871Pro	1|1	15	1	1|1	22	1	1|1	19	1	1|1	29	1
1	172526418	C	A	5_prime_UTR_premature_start_codon_gain_variant	Ccdc19	ENSMUSG00000026546	transcript	ENSMUST00000159395	protein_coding	c.-321C>A		1|1	24	1	1|1	48	1	1|1	17	1	1|1	29	1
1	172540481	T	C	splice_region_variant&intron_variant	Ccdc19	ENSMUSG00000026546	transcript	ENSMUST00000085894	protein_coding	c.1045-6T>C		1|1	9	1	1|1	43	1	1|1	20	1	1|1	29	1
1	172540603	A	AT	splice_region_variant&intron_variant	Ccdc19	ENSMUSG00000026546	transcript	ENSMUST00000085894	protein_coding	c.1158+3_1158+4insT		1|1	15	1	1|1	43	1	1|1	38	1	1|1	34	1
1	172540604	C	CCA	splice_region_variant&intron_variant	Ccdc19	ENSMUSG00000026546	transcript	ENSMUST00000085894	protein_coding	c.1158+5_1158+6insAC		1|1	15	1	1|1	43	1	1|1	38	1	1|1	34	1
1	172540606	T	G	splice_region_variant&intron_variant	Ccdc19	ENSMUSG00000026546	transcript	ENSMUST00000085894	protein_coding	c.1158+6T>G		1|1	15	1	1|1	43	1	1|1	38	1	1|1	34	1
1	172543009	GA	G	splice_region_variant&intron_variant	4933439K11Rik	ENSMUSG00000085184	transcript	ENSMUST00000132370	lincRNA	n.154-7delT		1|1	15	1	1|1	34	1	1|1	21	1	1|1	28	1
1	172581376	TAAAA	T	splice_region_variant	Slamf8	ENSMUSG00000053318	transcript	ENSMUST00000065679	protein_coding	c.*1064_*1067delTTTT		1|1	19	1	1|1	31	1	1|1	28	1	1|1	18	1
1	172584333	G	A	splice_region_variant&intron_variant	Slamf8	ENSMUSG00000053318	transcript	ENSMUST00000065679	protein_coding	c.667+7C>T		1|1	28	1	1|1	46	1	1|1	20	1	1|1	33	1
1	172584483	T	C	missense_variant	Slamf8	ENSMUSG00000053318	transcript	ENSMUST00000065679	protein_coding	c.524A>G	p.His175Arg	1|1	22	1	1|1	30	1	1|1	29	1	1|1	29	1
1	172587924	A	G	missense_variant	Slamf8	ENSMUSG00000053318	transcript	ENSMUST00000065679	protein_coding	c.346T>C	p.Tyr116His	1|1	23	1	1|1	37	1	1|1	21	1	1|1	40	1
1	172587951	T	C	missense_variant	Slamf8	ENSMUSG00000053318	transcript	ENSMUST00000065679	protein_coding	c.319A>G	p.Arg107Gly	1|1	16	1	1|1	36	1	1|1	21	1	1|1	38	1
1	172590470	T	C	5_prime_UTR_premature_start_codon_gain_variant	Slamf8	ENSMUSG00000053318	transcript	ENSMUST00000065679	protein_coding	c.-38A>G		1|1	22	1	1|1	50	1	1|1	20	1	1|1	18	1
1	172597669	T	C	missense_variant	Fcrl6	ENSMUSG00000070504	transcript	ENSMUST00000094303	protein_coding	c.794A>G	p.Gln265Arg	1|1	28	1	1|1	19	1	1|1	18	1	1|1	18	1
1	172597802	G	A	missense_variant	Fcrl6	ENSMUSG00000070504	transcript	ENSMUST00000094303	protein_coding	c.743C>T	p.Thr248Met	1|1	28	1	1|1	36	1	1|1	26	1	1|1	17	1
1	172598290	G	T	missense_variant	Fcrl6	ENSMUSG00000070504	transcript	ENSMUST00000094303	protein_coding	c.643C>A	p.Pro215Thr	1|1	28	1	1|1	25	1	1|1	21	1	1|1	28	1
1	172599046	T	C	splice_region_variant&intron_variant	Fcrl6	ENSMUSG00000070504	transcript	ENSMUST00000094303	protein_coding	c.325+7A>G		1|1	27	1	1|1	33	1	1|1	27	1	1|1	23	1
1	172599200	T	C	missense_variant	Fcrl6	ENSMUSG00000070504	transcript	ENSMUST00000094303	protein_coding	c.178A>G	p.Asn60Asp	1|1	27	1	1|1	27	1	1|1	34	1	1|1	30	1
1	172600048	G	A	missense_variant	Fcrl6	ENSMUSG00000070504	transcript	ENSMUST00000094303	protein_coding	c.41C>T	p.Ala14Val	1|1	30	1	1|1	26	1	1|1	19	1	1|1	33	1
1	172600056	C	A	missense_variant&splice_region_variant	Fcrl6	ENSMUSG00000070504	transcript	ENSMUST00000094303	protein_coding	c.33G>T	p.Glu11Asp	1|1	29	1	1|1	27	1	1|1	18	1	1|1	30	1
1	172698749	C	G	missense_variant	Crp	ENSMUSG00000037942	transcript	ENSMUST00000038495	protein_coding	c.400C>G	p.Pro134Ala	1|1	16	1	1|1	28	1	1|1	38	1	1|1	38	1
1	172698921	G	A	missense_variant	Crp	ENSMUSG00000037942	transcript	ENSMUST00000038495	protein_coding	c.572G>A	p.Ser191Asn	1|1	24	1	1|1	13	1	1|1	17	1	1|1	35	1
1	172894814	T	A	splice_region_variant&intron_variant	Apcs	ENSMUSG00000026542	transcript	ENSMUST00000027824	protein_coding	c.67+7A>T		1|1	24	1	1|1	32	1	1|1	27	1	1|1	30	1
1	173183633	C	T	missense_variant	Olfr1406	ENSMUSG00000058981	transcript	ENSMUST00000072395	protein_coding	c.800G>A	p.Arg267Lys	1|1	28	1	1|1	25	1	1|1	16	1	1|1	32	1
1	173184360	G	A	missense_variant	Olfr1406	ENSMUSG00000058981	transcript	ENSMUST00000072395	protein_coding	c.73C>T	p.Leu25Phe	1|1	22	1	1|1	22	1	1|1	21	1	1|1	38	1
1	173184502	C	T	5_prime_UTR_premature_start_codon_gain_variant	Olfr1406	ENSMUSG00000058981	transcript	ENSMUST00000072395	protein_coding	c.-70G>A		1|1	27	1	1|1	7	1	1|1	25	1	1|1	31	1
1	173203994	A	G	missense_variant	Olfr218	ENSMUSG00000046643	transcript	ENSMUST00000057548	protein_coding	c.637A>G	p.Ser213Gly	1|1	15	1	1|1	25	1	1|1	18	1	1|1	15	1
1	173222578	T	C	missense_variant	Fcer1a	ENSMUSG00000005339	transcript	ENSMUST00000049706	protein_coding	c.544A>G	p.Lys182Glu	1|1	24	1	1|1	24	1	1|1	29	1	1|1	36	1
1	173222761	C	T	missense_variant	Fcer1a	ENSMUSG00000005339	transcript	ENSMUST00000049706	protein_coding	c.361G>A	p.Val121Ile	1|1	30	1	1|1	21	1	1|1	22	1	1|1	34	1
1	173270184	G	GA	frameshift_variant	Olfr418-ps1	ENSMUSG00000049605	transcript	ENSMUST00000059754	protein_coding	c.10dupA	p.Arg4fs	0|1	48	0.44	0|1	37	0.51	0|1	29	0.45	0|1	68	0.54
1	173270187	G	A	missense_variant	Olfr418-ps1	ENSMUSG00000049605	transcript	ENSMUST00000059754	protein_coding	c.11G>A	p.Arg4Lys	0|1	49	0.45	0|1	37	0.51	0|1	29	0.45	0|1	69	0.55
1	173270201	A	G	missense_variant	Olfr418-ps1	ENSMUSG00000049605	transcript	ENSMUST00000059754	protein_coding	c.25A>G	p.Ile9Val	0/1	47	0.49	0/1	34	0.5	0/1	34	0.41	0/1	71	0.54
1	173270213	G	C	missense_variant	Olfr418-ps1	ENSMUSG00000049605	transcript	ENSMUST00000059754	protein_coding	c.37G>C	p.Val13Leu	0/1	50	0.5	0/1	33	0.45	0/1	34	0.38	0/1	69	0.59
1	173270297	G	A	missense_variant	Olfr418-ps1	ENSMUSG00000049605	transcript	ENSMUST00000059754	protein_coding	c.121G>A	p.Gly41Ser	0/1	41	0.51	0/1	31	0.45	0/1	38	0.42	0/1	68	0.6
1	173270332	T	G	missense_variant	Olfr418-ps1	ENSMUSG00000049605	transcript	ENSMUST00000059754	protein_coding	c.156T>G	p.Asp52Glu	0/1	43	0.56	0/1	34	0.47	0/1	41	0.46	0/1	65	0.62
1	173270333	C	T	missense_variant	Olfr418-ps1	ENSMUSG00000049605	transcript	ENSMUST00000059754	protein_coding	c.157C>T	p.Arg53Cys	0/1	43	0.56	0/1	34	0.47	0/1	41	0.46	0/1	65	0.62
1	173270340	T	G	missense_variant	Olfr418-ps1	ENSMUSG00000049605	transcript	ENSMUST00000059754	protein_coding	c.164T>G	p.Leu55Arg	0/1	43	0.53	0/1	36	0.44	0/1	43	0.44	0/1	63	0.62
1	173270372	C	A	missense_variant	Olfr418-ps1	ENSMUSG00000049605	transcript	ENSMUST00000059754	protein_coding	c.196C>A	p.Leu66Ile	0/1	39	0.49	0/1	33	0.42	0/1	45	0.51	0/1	62	0.61
1	173270416	G	C	missense_variant	Olfr418-ps1	ENSMUSG00000049605	transcript	ENSMUST00000059754	protein_coding	c.240G>C	p.Arg80Ser	0/1	41	0.54	0/1	36	0.47	0/1	47	0.6	0/1	61	0.64
1	173270447	C	T	missense_variant	Olfr418-ps1	ENSMUSG00000049605	transcript	ENSMUST00000059754	protein_coding	c.271C>T	p.Pro91Ser	1|1	45	1	1|1	36	1	1|1	58	1	1|1	69	1
1	173270483	T	G	missense_variant	Olfr418-ps1	ENSMUSG00000049605	transcript	ENSMUST00000059754	protein_coding	c.307T>G	p.Phe103Val	0/1	47	0.45	0/1	39	0.41	0/1	60	0.62	0/1	64	0.56
1	173270571	A	C	missense_variant	Olfr418-ps1	ENSMUSG00000049605	transcript	ENSMUST00000059754	protein_coding	c.395A>C	p.Tyr132Ser	0|1	36	0.47	0|1	35	0.4	0|1	60	0.53	0|1	52	0.46
1	173270630	GGGC	G	disruptive_inframe_deletion	Olfr418-ps1	ENSMUSG00000049605	transcript	ENSMUST00000059754	protein_coding	c.455_457delGGC	p.Gly152_Leu153delinsVal	0|1	38	0.5	0|1	36	0.47	0|1	47	0.45	0|1	50	0.46
1	173270634	TG	T	frameshift_variant	Olfr418-ps1	ENSMUSG00000049605	transcript	ENSMUST00000059754	protein_coding	c.459delG	p.Val155fs	0|1	33	0.48	0|1	35	0.49	0|1	45	0.47	0|1	49	0.45
1	173270636	CTTGTGGCAATAA	C	conservative_inframe_deletion	Olfr418-ps1	ENSMUSG00000049605	transcript	ENSMUST00000059754	protein_coding	c.463_474delGTGGCAATAATT	p.Val155_Ile158del	0|1	37	0.43	0|1	37	0.46	0|1	47	0.45	0|1	52	0.42
1	173270710	TGACATCC	T	frameshift_variant	Olfr418-ps1	ENSMUSG00000049605	transcript	ENSMUST00000059754	protein_coding	c.536_542delACATCCG	p.Asp179fs	0/1	51	0.35	0/1	34	0.53	0/1	62	0.5	0/1	54	0.35
1	173271018	C	A	missense_variant	Olfr418-ps1	ENSMUSG00000049605	transcript	ENSMUST00000059754	protein_coding	c.842C>A	p.Thr281Asn	0|1	48	0.33	0|1	26	0.46	0|1	53	0.47	0|1	68	0.51
1	173271097	T	A	missense_variant	Olfr418-ps1	ENSMUSG00000049605	transcript	ENSMUST00000059754	protein_coding	c.921T>A	p.Asn307Lys	1|1	47	1	1|1	45	1	1|1	49	1	1|1	75	1
1	173271101	C	T	missense_variant	Olfr418-ps1	ENSMUSG00000049605	transcript	ENSMUST00000059754	protein_coding	c.925C>T	p.Leu309Phe	0|1	48	0.35	0|1	45	0.4	0|1	50	0.4	0|1	75	0.51
1	173332148	A	G	missense_variant	Darc	ENSMUSG00000037872	transcript	ENSMUST00000038227	protein_coding	c.803T>C	p.Ile268Thr	1|1	13	1	1|1	24	1	1|1	23	1	1|1	26	1
1	173332289	G	A	missense_variant	Darc	ENSMUSG00000037872	transcript	ENSMUST00000038227	protein_coding	c.662C>T	p.Pro221Leu	1|1	25	1	1|1	36	1	1|1	29	1	1|1	33	1
1	173332330	C	A	missense_variant	Darc	ENSMUSG00000037872	transcript	ENSMUST00000038227	protein_coding	c.621G>T	p.Met207Ile	1|1	29	1	1|1	29	1	1|1	23	1	1|1	29	1
1	173332331	A	G	missense_variant	Darc	ENSMUSG00000037872	transcript	ENSMUST00000038227	protein_coding	c.620T>C	p.Met207Thr	1|1	29	1	1|1	29	1	1|1	23	1	1|1	29	1
1	173332371	C	T	missense_variant	Darc	ENSMUSG00000037872	transcript	ENSMUST00000038227	protein_coding	c.580G>A	p.Ala194Thr	1|1	33	1	1|1	28	1	1|1	21	1	1|1	33	1
1	173332725	C	T	missense_variant	Darc	ENSMUSG00000037872	transcript	ENSMUST00000038227	protein_coding	c.226G>A	p.Gly76Ser	1|1	18	1	1|1	21	1	1|1	17	1	1|1	18	1
1	173332784	C	T	missense_variant	Darc	ENSMUSG00000037872	transcript	ENSMUST00000038227	protein_coding	c.167G>A	p.Gly56Asp	1|1	11	1	1|1	22	1	1|1	21	1	1|1	20	1
1	173332922	T	G	missense_variant	Darc	ENSMUSG00000037872	transcript	ENSMUST00000038227	protein_coding	c.29A>C	p.Asn10Thr	1|1	16	1	1|1	24	1	1|1	27	1	1|1	33	1
1	173345063	A	G	splice_region_variant&intron_variant	Cadm3	ENSMUSG00000005338	transcript	ENSMUST00000005470	protein_coding	c.479-6T>C		1|1	25	1	1|1	27	1	1|1	19	1	1|1	27	1
1	173349125	TG	T	splice_region_variant&intron_variant	Cadm3	ENSMUSG00000005338	transcript	ENSMUST00000005470	protein_coding	c.83-3delC		1|1	20	1	1|1	30	1	1|1	25	1	1|1	33	1
1	173350882	A	G	5_prime_UTR_premature_start_codon_gain_variant	Aim2	ENSMUSG00000037860	transcript	ENSMUST00000147604	protein_coding	c.-749A>G		1|1	22	1	1|1	23	1	1|1	27	1	1|1	38	1
1	173350896	G	A	5_prime_UTR_premature_start_codon_gain_variant	Aim2	ENSMUSG00000037860	transcript	ENSMUST00000147604	protein_coding	c.-735G>A		1|1	18	1	1|1	25	1	1|1	30	1	1|1	42	1
1	173459709	C	T	missense_variant	Aim2	ENSMUSG00000037860	transcript	ENSMUST00000147604	protein_coding	c.274C>T	p.Leu92Phe	1|1	24	1	1|1	14	1	1|1	22	1	1|1	18	1
1	173471443	A	C	missense_variant	Gm4955	ENSMUSG00000037849	transcript	ENSMUST00000037976	protein_coding	c.538T>G	p.Phe180Val	1|1	8	1	1|1	10	1	1|1	10	1	1|1	6	1
1	173471447	G	T	missense_variant	Gm4955	ENSMUSG00000037849	transcript	ENSMUST00000037976	protein_coding	c.534C>A	p.Ser178Arg	1|1	8	1	1|1	9	1	1|1	10	1	1|1	6	1
1	173473630	G	A	splice_region_variant&intron_variant	Gm4955	ENSMUSG00000037849	transcript	ENSMUST00000037976	protein_coding	c.417+6C>T		1|1	29	1	1|1	28	1	1|1	24	1	1|1	26	1
1	173473759	G	T	missense_variant	Gm4955	ENSMUSG00000037849	transcript	ENSMUST00000037976	protein_coding	c.294C>A	p.Asn98Lys	1|1	27	1	1|1	21	1	1|1	24	1	1|1	36	1
1	173473860	C	T	missense_variant	Gm4955	ENSMUSG00000037849	transcript	ENSMUST00000037976	protein_coding	c.193G>A	p.Glu65Lys	1|1	12	1	1|1	10	1	1|1	18	1	1|1	16	1
1	173474010	T	C	missense_variant	Gm4955	ENSMUSG00000037849	transcript	ENSMUST00000037976	protein_coding	c.43A>G	p.Asn15Asp	1|1	8	1	1|1	4	1	1|1	10	1	1|1	12	1
1	173480417	C	G	missense_variant	Gm4955	ENSMUSG00000037849	transcript	ENSMUST00000160565	protein_coding	c.2012G>C	p.Arg671Pro	1|1	17	1	1|1	13	1	1|1	27	1	1|1	32	1
1	173480507	C	A	missense_variant	Gm4955	ENSMUSG00000037849	transcript	ENSMUST00000160565	protein_coding	c.1922G>T	p.Trp641Leu	0|1	22	0.55	0|1	9	0.44	0|1	19	0.42	0|1	19	0.63
1	173480508	A	T	missense_variant	Gm4955	ENSMUSG00000037849	transcript	ENSMUST00000160565	protein_coding	c.1921T>A	p.Trp641Arg	1|1	22	1	1|1	9	1	1|1	19	1	1|1	19	1
1	173480510	C	G	missense_variant	Gm4955	ENSMUSG00000037849	transcript	ENSMUST00000160565	protein_coding	c.1919G>C	p.Arg640Thr	0|1	22	0.55	0|1	9	0.44	0|1	19	0.42	0|1	19	0.63
1	173480525	C	T	missense_variant	Gm4955	ENSMUSG00000037849	transcript	ENSMUST00000160565	protein_coding	c.1904G>A	p.Arg635Gln	0|1	23	0.52	0|1	10	0.4	0|1	20	0.3	0|1	22	0.5
1	173480528	T	A	missense_variant	Gm4955	ENSMUSG00000037849	transcript	ENSMUST00000160565	protein_coding	c.1901A>T	p.Tyr634Phe	0|1	24	0.5	0|1	10	0.3	0|1	20	0.3	0|1	21	0.48
1	173480537	T	C	missense_variant	Gm4955	ENSMUSG00000037849	transcript	ENSMUST00000160565	protein_coding	c.1892A>G	p.Asp631Gly	0|1	23	0.43	0|1	11	0.18	0|1	22	0.27	0|1	21	0.48
1	173480540	C	T	missense_variant	Gm4955	ENSMUSG00000037849	transcript	ENSMUST00000160565	protein_coding	c.1889G>A	p.Ser630Asn	0|1	22	0.41	0|1	11	0.18	0|1	21	0.24	0|1	20	0.45
1	173480582	T	C	missense_variant	Gm4955	ENSMUSG00000037849	transcript	ENSMUST00000160565	protein_coding	c.1847A>G	p.Asn616Ser	1|1	20	1	1|1	14	1	1|1	20	1	1|1	16	1
1	173481108	C	T	missense_variant	Gm4955	ENSMUSG00000037849	transcript	ENSMUST00000160565	protein_coding	c.1321G>A	p.Val441Met	0/1	11	0.18	0/1	27	0.26	0/1	22	0.23	0/1	36	0.25
1	173481197	G	A	missense_variant	Gm4955	ENSMUSG00000037849	transcript	ENSMUST00000160565	protein_coding	c.1232C>T	p.Ala411Val	0/1	28	0.64	0/1	47	0.53	0/1	36	0.44	0/1	62	0.53
1	173481360	A	T	missense_variant	Gm4955	ENSMUSG00000037849	transcript	ENSMUST00000160565	protein_coding	c.1069T>A	p.Trp357Arg	0|1	27	0.37	0|1	30	0.3	0|1	32	0.19	0|1	47	0.28
1	173481380	A	T	missense_variant	Gm4955	ENSMUSG00000037849	transcript	ENSMUST00000160565	protein_coding	c.1049T>A	p.Phe350Tyr	0|1	28	0.29	0|1	29	0.28	0|1	29	0.1	0|1	42	0.24
1	173481389	C	T	missense_variant	Gm4955	ENSMUSG00000037849	transcript	ENSMUST00000160565	protein_coding	c.1040G>A	p.Gly347Asp	1|1	27	1	1|1	30	1	1|1	26	1	1|1	41	1
1	173481407	A	G	missense_variant	Gm4955	ENSMUSG00000037849	transcript	ENSMUST00000160565	protein_coding	c.1022T>C	p.Val341Ala	1|1	27	1	1|1	23	1	1|1	24	1	1|1	44	1
1	173481519	A	G	missense_variant	Gm4955	ENSMUSG00000037849	transcript	ENSMUST00000160565	protein_coding	c.910T>C	p.Cys304Arg	1|1	19	1	1|1	14	1	1|1	5	1	1|1	21	1
1	173481545	A	C	missense_variant	Gm4955	ENSMUSG00000037849	transcript	ENSMUST00000160565	protein_coding	c.884T>G	p.Leu295Trp	1|1	16	1	1|1	10	1	1|1	3	1	1|1	16	1
1	173481552	C	T	missense_variant	Gm4955	ENSMUSG00000037849	transcript	ENSMUST00000160565	protein_coding	c.877G>A	p.Ala293Thr	1|1	16	1	1|1	10	1	1|1	3	1	1|1	14	1
1	173481572	A	C	missense_variant	Gm4955	ENSMUSG00000037849	transcript	ENSMUST00000160565	protein_coding	c.857T>G	p.Met286Arg	1|1	13	1	1|1	7	1	1|1	3	1	1|1	10	1
1	173481579	G	A	missense_variant	Gm4955	ENSMUSG00000037849	transcript	ENSMUST00000160565	protein_coding	c.850C>T	p.Pro284Ser	1|1	12	1	1|1	7	1	1|1	4	1	1|1	10	1
1	173481879	G	T	missense_variant	Gm4955	ENSMUSG00000037849	transcript	ENSMUST00000160565	protein_coding	c.550C>A	p.Pro184Thr	1|1	23	1	1|1	16	1	1|1	19	1	1|1	26	1
1	173481935	G	A	missense_variant	Gm4955	ENSMUSG00000037849	transcript	ENSMUST00000160565	protein_coding	c.494C>T	p.Thr165Ile	1|1	16	1	1|1	21	1	1|1	20	1	1|1	28	1
1	173481948	C	G	missense_variant	Gm4955	ENSMUSG00000037849	transcript	ENSMUST00000160565	protein_coding	c.481G>C	p.Gly161Arg	1|1	15	1	1|1	21	1	1|1	16	1	1|1	27	1
1	173481972	T	C	missense_variant	Gm4955	ENSMUSG00000037849	transcript	ENSMUST00000160565	protein_coding	c.457A>G	p.Thr153Ala	1|1	19	1	1|1	22	1	1|1	17	1	1|1	20	1
1	173485522	A	G	splice_region_variant&intron_variant	Gm4955	ENSMUSG00000037849	transcript	ENSMUST00000160565	protein_coding	c.372+7T>C		1|1	22	1	1|1	9	1	1|1	26	1	1|1	38	1
1	173486603	C	T	splice_region_variant&intron_variant	Gm4955	ENSMUSG00000037849	transcript	ENSMUST00000160565	protein_coding	c.265+5G>A		1|1	16	1	1|1	16	1	1|1	24	1	1|1	39	1
1	173486640	T	C	missense_variant	Gm4955	ENSMUSG00000037849	transcript	ENSMUST00000160565	protein_coding	c.233A>G	p.His78Arg	1|1	16	1	1|1	17	1	1|1	24	1	1|1	39	1
1	173522835	T	G	splice_region_variant&non_coding_transcript_exon_variant	BC094916	ENSMUSG00000070501	transcript	ENSMUST00000097463	nonsense_mediated_decay	n.*704A>C		1|1	37	1	1|1	20	1	1|1	29	1	1|1	29	1
1	173526374	TGGGGGG	T	splice_region_variant&intron_variant	BC094916	ENSMUSG00000070501	transcript	ENSMUST00000097463	nonsense_mediated_decay	n.640-8_640-3delCCCCCC		1|1	21	1	1|1	19	1	1|1	16	1	1|1	24	1
1	173526462	A	G	splice_donor_variant&intron_variant	BC094916	ENSMUSG00000070501	transcript	ENSMUST00000139092	protein_coding	c.639+2T>C		1|1	22	1	1|1	15	1	1|1	17	1	1|1	25	1
1	173589822	A	C	missense_variant	Pydc4	ENSMUSG00000073491	transcript	ENSMUST00000150649	protein_coding	c.1023T>G	p.His341Gln	1|1	17	1	1|1	10	1	1|1	12	1	1|1	16	1
1	173589907	C	T	missense_variant	Pydc4	ENSMUSG00000073491	transcript	ENSMUST00000150649	protein_coding	c.938G>A	p.Arg313Gln	1|1	27	1	1|1	19	1	1|1	22	1	1|1	31	1
1	173589949	A	C	missense_variant	Pydc4	ENSMUSG00000073491	transcript	ENSMUST00000150649	protein_coding	c.896T>G	p.Leu299Trp	1|1	38	0.97	1|1	24	1	1|1	30	1	1|1	40	1
1	173590025	T	C	missense_variant	Pydc4	ENSMUSG00000073491	transcript	ENSMUST00000150649	protein_coding	c.820A>G	p.Thr274Ala	0/1	36	0.47	0/1	33	0.24	0/1	37	0.38	0/1	46	0.3
1	173590115	T	C	missense_variant	Pydc4	ENSMUSG00000073491	transcript	ENSMUST00000150649	protein_coding	c.730A>G	p.Lys244Glu	0|1	34	0.76	0|1	30	0.83	0|1	28	0.89	0|1	41	0.85
1	173590121	T	A	missense_variant	Pydc4	ENSMUSG00000073491	transcript	ENSMUST00000150649	protein_coding	c.724A>T	p.Thr242Ser	0|1	31	0.84	0|1	26	0.88	0|1	28	0.89	0|1	43	0.86
1	173593963	G	A	missense_variant	Pydc4	ENSMUSG00000073491	transcript	ENSMUST00000150649	protein_coding	c.359C>T	p.Pro120Leu	1|1	28	0.96	1|1	25	0.96	1|1	29	0.97	1|1	39	1
1	173595145	G	C	missense_variant	Pydc4	ENSMUSG00000073491	transcript	ENSMUST00000150649	protein_coding	c.153C>G	p.Asn51Lys	1|1	7	1	1|1	4	1	1|1	5	1	1|1	11	1
1	173595272	C	T	missense_variant	Pydc4	ENSMUSG00000073491	transcript	ENSMUST00000150649	protein_coding	c.26G>A	p.Cys9Tyr	1|1	22	1	1|1	7	1	1|1	10	1	1|1	18	1
1	173595279	TCAC	T	conservative_inframe_deletion	Pydc4	ENSMUSG00000073491	transcript	ENSMUST00000150649	protein_coding	c.16_18delGTG	p.Val6del	1|1	22	1	1|1	8	1	1|1	10	1	1|1	18	1
1	173637559	A	T	missense_variant	Pyhin1	ENSMUSG00000043263	transcript	ENSMUST00000056071	protein_coding	c.254A>T	p.Lys85Met	1|1	19	1	1|1	16	1	1|1	21	1	1|1	27	1
1	173642527	A	T	missense_variant	Pyhin1	ENSMUSG00000043263	transcript	ENSMUST00000056071	protein_coding	c.680A>T	p.Glu227Val	1|1	23	1	1|1	29	1	1|1	35	1	1|1	30	1
1	173642860	A	G	missense_variant	Pyhin1	ENSMUSG00000043263	transcript	ENSMUST00000056071	protein_coding	c.1013A>G	p.Lys338Arg	1|1	23	1	1|1	21	1	1|1	9	1	1|1	17	1
1	173646000	G	A	missense_variant	Pyhin1	ENSMUSG00000043263	transcript	ENSMUST00000056071	protein_coding	c.1252G>A	p.Ala418Thr	1|1	18	1	1|1	14	1	1|1	30	1	1|1	22	1
1	173677698	ATGG	A	conservative_inframe_deletion	Pydc3	ENSMUSG00000066677	transcript	ENSMUST00000085876	protein_coding	c.16_18delGTG	p.Val6del	1|1	21	1	1|1	24	1	1|1	26	1	1|1	33	1
1	173682830	C	T	missense_variant	Pydc3	ENSMUSG00000066677	transcript	ENSMUST00000085876	protein_coding	c.550C>T	p.Pro184Ser	1|1	23	1	1|1	17	1	1|1	38	1	1|1	28	1
1	173683442	C	T	missense_variant	Pydc3	ENSMUSG00000066677	transcript	ENSMUST00000085876	protein_coding	c.1162C>T	p.Pro388Ser	1|1	22	1	1|1	19	1	1|1	23	1	1|1	28	1
1	173697436	G	C	missense_variant	Pydc3	ENSMUSG00000066677	transcript	ENSMUST00000085876	protein_coding	c.1736G>C	p.Gly579Ala	1|1	22	1	1|1	14	1	1|1	16	1	1|1	26	1
1	173727761	T	C	missense_variant	AI607873	ENSMUSG00000073490	transcript	ENSMUST00000042610	protein_coding	c.2375A>G	p.Lys792Arg	1|1	29	1	1|1	38	1	1|1	28	1	1|1	31	1
1	173728922	A	G	missense_variant	AI607873	ENSMUSG00000073490	transcript	ENSMUST00000042610	protein_coding	c.2270T>C	p.Ile757Thr	1|1	25	1	1|1	24	1	1|1	33	1	1|1	48	1
1	173728947	T	C	missense_variant	AI607873	ENSMUSG00000073490	transcript	ENSMUST00000042610	protein_coding	c.2245A>G	p.Thr749Ala	1|1	25	1	1|1	21	1	1|1	35	1	1|1	41	1
1	173729660	C	G	missense_variant	AI607873	ENSMUSG00000073490	transcript	ENSMUST00000042610	protein_coding	c.1532G>C	p.Arg511Thr	1|1	28	1	1|1	18	1	1|1	13	1	1|1	40	1
1	173730219	A	G	missense_variant	AI607873	ENSMUSG00000073490	transcript	ENSMUST00000042610	protein_coding	c.973T>C	p.Tyr325His	1|1	12	1	1|1	17	1	1|1	18	1	1|1	28	1
1	173730275	T	C	missense_variant	AI607873	ENSMUSG00000073490	transcript	ENSMUST00000042610	protein_coding	c.917A>G	p.Asn306Ser	1|1	5	1	1|1	8	1	1|1	7	1	1|1	20	1
1	173730288	T	A	missense_variant	AI607873	ENSMUSG00000073490	transcript	ENSMUST00000042610	protein_coding	c.904A>T	p.Thr302Ser	1|1	5	1	1|1	4	1	1|1	6	1	1|1	16	1
1	173730353	T	G	missense_variant	AI607873	ENSMUSG00000073490	transcript	ENSMUST00000042610	protein_coding	c.839A>C	p.His280Pro	1|1	4	1	1|1	7	1	1|1	9	1	1|1	10	1
1	173732310	C	G	missense_variant	AI607873	ENSMUSG00000073490	transcript	ENSMUST00000042610	protein_coding	c.616G>C	p.Ala206Pro	1|1	18	1	1|1	19	1	1|1	29	1	1|1	29	1
1	173732408	T	C	missense_variant	AI607873	ENSMUSG00000073490	transcript	ENSMUST00000042610	protein_coding	c.518A>G	p.Glu173Gly	1|1	27	1	1|1	25	1	1|1	34	1	1|1	33	1
1	173735134	C	T	missense_variant	AI607873	ENSMUSG00000073490	transcript	ENSMUST00000042610	protein_coding	c.445G>A	p.Gly149Arg	1|1	13	1	1|1	19	1	1|1	16	1	1|1	17	1
1	173735157	GCCTGAGCTGTGGAAGTCTCCC	G	disruptive_inframe_deletion	AI607873	ENSMUSG00000073490	transcript	ENSMUST00000042610	protein_coding	c.401_421delGGGAGACTTCCACAGCTCAGG	p.Gly134_Gln140del	1|1	13	1	1|1	22	1	1|1	16	1	1|1	17	1
1	173735321	G	T	splice_region_variant&intron_variant	AI607873	ENSMUSG00000073490	transcript	ENSMUST00000042610	protein_coding	c.266-8C>A		1|1	18	1	1|1	24	1	1|1	22	1	1|1	33	1
1	173736253	C	T	missense_variant	AI607873	ENSMUSG00000073490	transcript	ENSMUST00000042610	protein_coding	c.199G>A	p.Glu67Lys	1|1	16	1	1|1	20	1	1|1	27	1	1|1	26	1
1	173736279	G	T	missense_variant	AI607873	ENSMUSG00000073490	transcript	ENSMUST00000042610	protein_coding	c.173C>A	p.Pro58His	1|1	16	1	1|1	22	1	1|1	31	1	1|1	32	1
1	173736280	G	C	missense_variant	AI607873	ENSMUSG00000073490	transcript	ENSMUST00000042610	protein_coding	c.172C>G	p.Pro58Ala	1|1	16	1	1|1	22	1	1|1	31	1	1|1	32	1
1	173755937	G	C	missense_variant	Ifi204	ENSMUSG00000073489	transcript	ENSMUST00000111214	protein_coding	c.714C>G	p.Asp238Glu	0/1	58	0.36	0/1	45	0.6	0/1	52	0.54	0/1	77	0.52
1	173796815	A	C	splice_region_variant&intron_variant	Gm16340	ENSMUSG00000090222	transcript	ENSMUST00000155076	unprocessed_pseudogene	n.632+6T>G		1|1	9	1	1|1	10	1	1|1	18	1	1|1	11	1
1	173798296	T	TA	splice_region_variant&intron_variant	Gm16340	ENSMUSG00000090222	transcript	ENSMUST00000155076	unprocessed_pseudogene	n.226-3dupT		1|1	27	1	1|1	12	1	1|1	21	0.95	1|1	23	0.91
1	173857435	T	C	missense_variant	Mndal	ENSMUSG00000090272	transcript	ENSMUST00000111210	protein_coding	c.1567A>G	p.Asn523Asp	1|1	20	1	1|1	14	1	1|1	28	1	1|1	47	1
1	173857514	C	G	splice_region_variant&intron_variant	Mndal	ENSMUSG00000090272	transcript	ENSMUST00000111210	protein_coding	c.1492-4G>C		1|1	15	1	1|1	18	1	1|1	30	1	1|1	50	1
1	173865544	C	A	missense_variant	Mndal	ENSMUSG00000090272	transcript	ENSMUST00000111210	protein_coding	c.734G>T	p.Arg245Met	1|1	27	1	1|1	7	1	1|1	17	1	1|1	29	1
1	173873013	C	T	missense_variant	Mndal	ENSMUSG00000090272	transcript	ENSMUST00000111210	protein_coding	c.391G>A	p.Gly131Arg	1|1	25	1	1|1	20	1	1|1	13	1	1|1	31	1
1	173874436	A	C	missense_variant	Mndal	ENSMUSG00000090272	transcript	ENSMUST00000111210	protein_coding	c.299T>G	p.Val100Gly	1|1	63	1	1|1	61	1	1|1	66	1	1|1	91	1
1	173874442	G	A	missense_variant	Mndal	ENSMUSG00000090272	transcript	ENSMUST00000111210	protein_coding	c.293C>T	p.Thr98Met	0/1	64	0.28	0/1	56	0.41	0/1	66	0.24	0/1	89	0.28
1	173874458	G	T	missense_variant	Mndal	ENSMUSG00000090272	transcript	ENSMUST00000111210	protein_coding	c.277C>A	p.Gln93Lys	0|1	54	0.56	0|1	57	0.58	0|1	57	0.49	0|1	79	0.63
1	173874467	T	C	missense_variant	Mndal	ENSMUSG00000090272	transcript	ENSMUST00000111210	protein_coding	c.268A>G	p.Lys90Glu	0|1	55	0.51	0|1	56	0.54	0|1	50	0.44	0|1	74	0.62
1	173875666	A	C	missense_variant	Mndal	ENSMUSG00000090272	transcript	ENSMUST00000111210	protein_coding	c.172T>G	p.Tyr58Asp	1|1	26	1	1|1	29	1	1|1	22	1	1|1	39	1
1	173875820	T	A	missense_variant	Mndal	ENSMUSG00000090272	transcript	ENSMUST00000111210	protein_coding	c.18A>T	p.Lys6Asn	1|1	16	1	1|1	6	1	1|1	13	1	1|1	18	1
1	173879929	G	A	5_prime_UTR_premature_start_codon_gain_variant	Mndal	ENSMUSG00000090272	transcript	ENSMUST00000111210	protein_coding	c.-28C>T		0/1	76	0.16	0/1	50	0.28	0/1	89	0.25	0/1	91	0.23
1	173899349	C	T	missense_variant	Mnda	ENSMUSG00000026536	transcript	ENSMUST00000009340	protein_coding	c.1228G>A	p.Val410Ile	0/1	14	0.5	0/1	7	0.57	0/1	8	0.62	0/1	13	0.46
1	173899460	C	G	missense_variant	Mnda	ENSMUSG00000026536	transcript	ENSMUST00000009340	protein_coding	c.1117G>C	p.Gly373Arg	1|1	20	0.95	1|1	13	1	1|1	14	1	1|1	20	0.95
1	173899462	C	G	missense_variant	Mnda	ENSMUSG00000026536	transcript	ENSMUST00000009340	protein_coding	c.1115G>C	p.Ser372Thr	1|1	20	0.95	1|1	13	1	1|1	14	1	1|1	20	0.95
1	173899463	T	A	missense_variant	Mnda	ENSMUSG00000026536	transcript	ENSMUST00000009340	protein_coding	c.1114A>T	p.Ser372Cys	1|1	20	0.95	1|1	13	1	1|1	14	1	1|1	20	0.95
1	173899507	C	A	missense_variant	Mnda	ENSMUSG00000026536	transcript	ENSMUST00000009340	protein_coding	c.1070G>T	p.Ser357Ile	1|1	15	1	1|1	10	1	1|1	11	1	1|1	16	1
1	173899516	TGTG	T	disruptive_inframe_deletion	Mnda	ENSMUSG00000026536	transcript	ENSMUST00000009340	protein_coding	c.1058_1060delCAC	p.Thr353_Gln354delinsLys	1|1	13	1	1|1	9	1	1|1	11	1	1|1	14	1
1	173899521	T	TCGG	disruptive_inframe_insertion	Mnda	ENSMUSG00000026536	transcript	ENSMUST00000009340	protein_coding	c.1055_1056insCCG	p.Lys352delinsAsnArg	1|1	11	1	1|1	8	1	1|1	11	1	1|1	14	1
1	173899528	T	G	missense_variant	Mnda	ENSMUSG00000026536	transcript	ENSMUST00000009340	protein_coding	c.1049A>C	p.Lys350Thr	1|1	12	1	1|1	6	1	1|1	11	1	1|1	13	1
1	173899536	G	C	splice_region_variant&intron_variant	Mnda	ENSMUSG00000026536	transcript	ENSMUST00000009340	protein_coding	c.1045-4C>G		1|1	10	1	1|1	6	1	1|1	10	1	1|1	13	1
1	173905483	A	G	missense_variant	Mnda	ENSMUSG00000026536	transcript	ENSMUST00000009340	protein_coding	c.611T>C	p.Leu204Pro	1|1	19	1	1|1	9	1	1|1	29	1	1|1	29	1
1	173906191	C	T	missense_variant	Mnda	ENSMUSG00000026536	transcript	ENSMUST00000009340	protein_coding	c.403G>A	p.Gly135Arg	0|1	12	0.33	0|1	20	0.7	0|1	14	0.86	0|1	13	0.77
1	173906193	G	A	missense_variant	Mnda	ENSMUSG00000026536	transcript	ENSMUST00000009340	protein_coding	c.401C>T	p.Ala134Val	0|1	12	0.33	0|1	20	0.7	0|1	14	0.86	0|1	13	0.77
1	173927228	C	T	splice_region_variant&intron_variant	Ifi203	ENSMUSG00000039997	transcript	ENSMUST00000129829	protein_coding	c.1942-6G>A		1|1	42	1	1|1	44	1	1|1	46	1	1|1	90	1
1	173928275	G	C	missense_variant&splice_region_variant	Ifi203	ENSMUSG00000039997	transcript	ENSMUST00000129829	protein_coding	c.1941C>G	p.Ser647Arg	0/1	31	0.71	0|1	43	0.53	0/1	53	0.64	0|1	55	0.36
1	173928328	C	T	missense_variant	Ifi203	ENSMUSG00000039997	transcript	ENSMUST00000129829	protein_coding	c.1888G>A	p.Ala630Thr	0/1	46	0.17	0|1	48	0.44	0/1	64	0.23	0|1	79	0.22
1	173928370	G	T	missense_variant	Ifi203	ENSMUSG00000039997	transcript	ENSMUST00000129829	protein_coding	c.1846C>A	p.Arg616Ser	1|1	66	1	1|1	64	1	1|1	78	1	1|1	98	1
1	173928400	G	A	missense_variant	Ifi203	ENSMUSG00000039997	transcript	ENSMUST00000129829	protein_coding	c.1816C>T	p.His606Tyr	0/1	78	0.24	0|1	67	0.27	0/1	80	0.34	0|1	105	0.41
1	173928457	T	C	missense_variant	Ifi203	ENSMUSG00000039997	transcript	ENSMUST00000129829	protein_coding	c.1759A>G	p.Ser587Gly	0/1	70	0.76	0/1	54	0.69	0/1	72	0.67	0/1	96	0.71
1	173928514	C	T	missense_variant	Ifi203	ENSMUSG00000039997	transcript	ENSMUST00000129829	protein_coding	c.1702G>A	p.Val568Ile	0/1	51	0.33	0/1	42	0.55	0/1	70	0.36	0/1	84	0.38
1	173928531	G	A	missense_variant	Ifi203	ENSMUSG00000039997	transcript	ENSMUST00000129829	protein_coding	c.1685C>T	p.Ala562Val	0/1	48	0.58	0/1	39	0.85	0/1	70	0.64	0/1	87	0.68
1	173928535	C	T	missense_variant	Ifi203	ENSMUSG00000039997	transcript	ENSMUST00000129829	protein_coding	c.1681G>A	p.Glu561Lys	0/1	51	0.39	0/1	37	0.19	0/1	72	0.38	0/1	90	0.31
1	173928582	T	C	missense_variant	Ifi203	ENSMUSG00000039997	transcript	ENSMUST00000129829	protein_coding	c.1634A>G	p.Asn545Ser	1|1	54	1	1|1	38	1	1|1	77	1	1|1	84	1
1	173928876	T	C	missense_variant	Ifi203	ENSMUSG00000039997	transcript	ENSMUST00000129829	protein_coding	c.1340A>G	p.Asn447Ser	0/1	83	0.65	0/1	47	0.57	0/1	59	0.68	0/1	92	0.78
1	173928897	A	G	missense_variant	Ifi203	ENSMUSG00000039997	transcript	ENSMUST00000129829	protein_coding	c.1319T>C	p.Ile440Thr	0|1	78	0.33	0|1	47	0.32	0|1	52	0.23	0|1	84	0.36
1	173928903	G	T	missense_variant	Ifi203	ENSMUSG00000039997	transcript	ENSMUST00000129829	protein_coding	c.1313C>A	p.Pro438His	0|1	79	0.33	0|1	48	0.31	0|1	51	0.2	0|1	82	0.35
1	173928984	G	T	missense_variant	Ifi203	ENSMUSG00000039997	transcript	ENSMUST00000129829	protein_coding	c.1232C>A	p.Ala411Glu	0/1	68	0.78	0/1	56	0.8	0/1	44	0.77	0/1	74	0.86
1	173929128	C	G	missense_variant	Ifi203	ENSMUSG00000039997	transcript	ENSMUST00000129829	protein_coding	c.1088G>C	p.Ser363Thr	0/1	44	0.55	0/1	46	0.52	0/1	53	0.55	0/1	48	0.48
1	173929153	G	A	missense_variant	Ifi203	ENSMUSG00000039997	transcript	ENSMUST00000129829	protein_coding	c.1063C>T	p.Leu355Phe	0/1	43	0.33	0/1	47	0.47	0/1	49	0.47	0/1	55	0.55
1	173929159	C	T	missense_variant	Ifi203	ENSMUSG00000039997	transcript	ENSMUST00000129829	protein_coding	c.1057G>A	p.Val353Ile	1|1	43	1	1|1	45	0.96	1|1	49	0.96	1|1	56	0.98
1	173929215	A	G	missense_variant	Ifi203	ENSMUSG00000039997	transcript	ENSMUST00000129829	protein_coding	c.1001T>C	p.Phe334Ser	0|1	42	0.6	0|1	51	0.57	0|1	61	0.52	0|1	72	0.57
1	173929218	A	T	missense_variant	Ifi203	ENSMUSG00000039997	transcript	ENSMUST00000129829	protein_coding	c.998T>A	p.Leu333Gln	0|1	42	0.6	0|1	51	0.57	0|1	61	0.52	0|1	72	0.57
1	173929251	T	C	missense_variant	Ifi203	ENSMUSG00000039997	transcript	ENSMUST00000129829	protein_coding	c.965A>G	p.Asn322Ser	1|1	36	1	1|1	35	1	1|1	52	0.98	1|1	65	1
1	173929302	G	A	missense_variant	Ifi203	ENSMUSG00000039997	transcript	ENSMUST00000129829	protein_coding	c.914C>T	p.Ser305Phe	0/1	30	0.3	0/1	24	0.29	0/1	38	0.13	0/1	60	0.33
1	173929305	A	C	missense_variant	Ifi203	ENSMUSG00000039997	transcript	ENSMUST00000129829	protein_coding	c.911T>G	p.Ile304Ser	1|1	30	1	1|1	23	1	1|1	37	1	1|1	57	1
1	173929329	T	G	missense_variant	Ifi203	ENSMUSG00000039997	transcript	ENSMUST00000129829	protein_coding	c.887A>C	p.His296Pro	0/1	24	0.79	0/1	25	0.6	0/1	32	0.53	0/1	46	0.7
1	173933778	C	A	splice_region_variant&intron_variant	Ifi203	ENSMUSG00000039997	transcript	ENSMUST00000129829	protein_coding	c.699+5G>T		1|1	53	1	1|1	35	1	1|1	54	1	1|1	66	1
1	173933889	C	T	missense_variant	Ifi203	ENSMUSG00000039997	transcript	ENSMUST00000129829	protein_coding	c.593G>A	p.Arg198Gln	1|1	54	1	1|1	49	1	1|1	52	1	1|1	70	1
1	173935180	GA	G	splice_region_variant&intron_variant	Ifi203	ENSMUSG00000039997	transcript	ENSMUST00000129829	protein_coding	c.388-4delT		1|1	37	1	1|1	29	1	1|1	52	1	1|1	42	1
1	173936609	G	A	missense_variant	Ifi203	ENSMUSG00000039997	transcript	ENSMUST00000129829	protein_coding	c.296C>T	p.Thr99Met	0/1	19	0.42	0/1	15	0.6	0/1	10	0.6	0/1	16	0.44
1	173936625	C	T	missense_variant	Ifi203	ENSMUSG00000039997	transcript	ENSMUST00000129829	protein_coding	c.280G>A	p.Glu94Lys	1|1	25	1	1|1	20	1	1|1	14	1	1|1	23	1
1	173936634	T	C	missense_variant	Ifi203	ENSMUSG00000039997	transcript	ENSMUST00000129829	protein_coding	c.271A>G	p.Lys91Glu	1|1	26	1	1|1	20	1	1|1	16	1	1|1	25	1
1	173937735	C	T	splice_region_variant&intron_variant	Ifi203	ENSMUSG00000039997	transcript	ENSMUST00000129829	protein_coding	c.265+7G>A		1|1	40	1	1|1	34	1	1|1	40	1	1|1	65	1
1	173937851	A	C	missense_variant	Ifi203	ENSMUSG00000039997	transcript	ENSMUST00000129829	protein_coding	c.156T>G	p.Ile52Met	1|1	53	1	1|1	35	1	1|1	52	1	1|1	52	1
1	173938005	A	G	start_lost	Ifi203	ENSMUSG00000039997	transcript	ENSMUST00000129829	protein_coding	c.2T>C	p.Met1?	1|1	50	1	1|1	42	1	1|1	60	1	1|1	72	1
1	173942655	C	G	splice_donor_variant&intron_variant	Ifi203	ENSMUSG00000039997	transcript	ENSMUST00000156895	protein_coding	c.-86+1G>C		1|1	12	1	1|1	9	1	1|1	17	1	1|1	9	1
1	173942656	A	G	splice_region_variant	Ifi203	ENSMUSG00000039997	transcript	ENSMUST00000156895	protein_coding	c.-86T>C		1|1	12	1	1|1	9	1	1|1	17	1	1|1	9	1
1	173942657	A	G	splice_region_variant	Ifi203	ENSMUSG00000039997	transcript	ENSMUST00000156895	protein_coding	c.-87T>C		1|1	12	1	1|1	9	1	1|1	17	1	1|1	9	1
1	173963817	A	C	missense_variant	Ifi202b	ENSMUSG00000026535	transcript	ENSMUST00000000266	protein_coding	c.1294T>G	p.Ser432Ala	1|1	79	0.99	1|1	64	1	1|1	65	1	1|1	103	1
1	173963862	C	T	missense_variant	Ifi202b	ENSMUSG00000026535	transcript	ENSMUST00000000266	protein_coding	c.1249G>A	p.Val417Ile	0/1	89	0.46	0/1	72	0.26	0/1	67	0.33	0/1	103	0.27
1	173963976	T	A	missense_variant	Ifi202b	ENSMUSG00000026535	transcript	ENSMUST00000000266	protein_coding	c.1135A>T	p.Thr379Ser	1|1	99	1	1|1	78	1	1|1	71	1	1|1	97	1
1	173971379	C	A	missense_variant	Ifi202b	ENSMUSG00000026535	transcript	ENSMUST00000000266	protein_coding	c.1102G>T	p.Val368Phe	0/1	68	0.31	0/1	46	0.26	0/1	70	0.33	0/1	92	0.34
1	173971391	T	C	missense_variant	Ifi202b	ENSMUSG00000026535	transcript	ENSMUST00000000266	protein_coding	c.1090A>G	p.Lys364Glu	0/1	71	0.32	0/1	44	0.23	0/1	66	0.32	0/1	93	0.38
1	173971432	A	G	missense_variant	Ifi202b	ENSMUSG00000026535	transcript	ENSMUST00000000266	protein_coding	c.1049T>C	p.Leu350Pro	1|1	79	1	1|1	38	1	1|1	69	1	1|1	91	1
1	173971503	TA	T	frameshift_variant	Ifi202b	ENSMUSG00000026535	transcript	ENSMUST00000000266	protein_coding	c.977delT	p.Ile326fs	0/1	78	0.23	0/1	50	0.38	0/1	59	0.25	0/1	94	0.31
1	173972196	T	C	missense_variant	Ifi202b	ENSMUSG00000026535	transcript	ENSMUST00000000266	protein_coding	c.718A>G	p.Ile240Val	0/1	80	0.45	0/1	68	0.32	0/1	62	0.24	0/1	106	0.42
1	173972304	T	C	missense_variant	Ifi202b	ENSMUSG00000026535	transcript	ENSMUST00000000266	protein_coding	c.610A>G	p.Lys204Glu	1|1	68	1	1|1	68	1	1|1	90	1	1|1	130	1
1	173974843	T	A	missense_variant	Ifi202b	ENSMUSG00000026535	transcript	ENSMUST00000000266	protein_coding	c.424A>T	p.Ile142Phe	1|1	90	1	1|1	66	1	1|1	87	1	1|1	111	1
1	173974844	A	C	missense_variant	Ifi202b	ENSMUSG00000026535	transcript	ENSMUST00000000266	protein_coding	c.423T>G	p.Ile141Met	1|1	90	1	1|1	66	1	1|1	87	1	1|1	111	1
1	173974993	G	T	missense_variant	Ifi202b	ENSMUSG00000026535	transcript	ENSMUST00000000266	protein_coding	c.274C>A	p.Gln92Lys	0/1	91	0.43	0/1	75	0.43	0/1	64	0.27	0/1	103	0.41
1	173975061	G	A	missense_variant	Ifi202b	ENSMUSG00000026535	transcript	ENSMUST00000000266	protein_coding	c.206C>T	p.Ala69Val	0/1	78	0.22	0/1	93	0.28	0/1	62	0.42	0/1	122	0.33
1	173977342	A	C	missense_variant	Ifi202b	ENSMUSG00000026535	transcript	ENSMUST00000000266	protein_coding	c.43T>G	p.Ser15Ala	0|1	86	0.44	0|1	68	0.34	0|1	98	0.35	0|1	89	0.37
1	173977345	A	G	missense_variant	Ifi202b	ENSMUSG00000026535	transcript	ENSMUST00000000266	protein_coding	c.40T>C	p.Phe14Leu	0|1	85	0.44	0|1	67	0.34	0|1	95	0.36	0|1	90	0.37
1	173977346	T	A	missense_variant	Ifi202b	ENSMUSG00000026535	transcript	ENSMUST00000000266	protein_coding	c.39A>T	p.Glu13Asp	0|1	85	0.44	0|1	67	0.34	0|1	95	0.36	0|1	89	0.37
1	173977437	T	G	splice_region_variant	Ifi202b	ENSMUSG00000026535	transcript	ENSMUST00000000266	protein_coding	c.-53A>C		0|1	83	0.37	0|1	44	0.3	0|1	94	0.29	0/1	77	0.34
1	173977443	TAAAAAGACAA	T	splice_region_variant&intron_variant	Ifi202b	ENSMUSG00000026535	transcript	ENSMUST00000000266	protein_coding	c.-53-16_-53-7delTTGTCTTTTT		0|1	82	0.33	0|1	45	0.29	0|1	99	0.46	0/1	85	0.27
1	173982812	A	C	5_prime_UTR_premature_start_codon_gain_variant	Ifi202b	ENSMUSG00000026535	transcript	ENSMUST00000000266	protein_coding	c.-192T>G		0|1	58	0.12	0|1	36	0.42	0|1	70	0.27	0|1	73	0.18
1	174027285	T	C	missense_variant	Ifi205	ENSMUSG00000054203	transcript	ENSMUST00000059226	protein_coding	c.307A>G	p.Ser103Gly	1|1	11	1	1|1	9	1	1|1	26	1	1|1	21	1
1	174027320	T	C	missense_variant	Ifi205	ENSMUSG00000054203	transcript	ENSMUST00000059226	protein_coding	c.272A>G	p.Glu91Gly	1|1	18	1	1|1	13	1	1|1	37	1	1|1	28	1
1	174028272	C	T	missense_variant	Ifi205	ENSMUSG00000054203	transcript	ENSMUST00000059226	protein_coding	c.191G>A	p.Arg64Lys	1|1	27	1	1|1	13	1	1|1	14	1	1|1	25	1
1	174042364	G	A	missense_variant	Olfr433	ENSMUSG00000045381	transcript	ENSMUST00000052975	protein_coding	c.413G>A	p.Arg138Lys	1|1	28	1	1|1	12	1	1|1	17	1	1|1	33	1
1	174050519	A	G	missense_variant	Olfr432	ENSMUSG00000047048	transcript	ENSMUST00000062665	protein_coding	c.145A>G	p.Ile49Val	1|1	26	1	1|1	25	1	1|1	30	1	1|1	29	1
1	174089147	T	C	missense_variant	Olfr429	ENSMUSG00000049528	transcript	ENSMUST00000060693	protein_coding	c.106T>C	p.Phe36Leu	1|1	26	1	1|1	23	1	1|1	20	1	1|1	37	1
1	174089522	T	A	missense_variant	Olfr429	ENSMUSG00000049528	transcript	ENSMUST00000060693	protein_coding	c.481T>A	p.Ser161Thr	1|1	25	1	1|1	24	1	1|1	26	1	1|1	32	1
1	174089913	G	A	missense_variant	Olfr429	ENSMUSG00000049528	transcript	ENSMUST00000060693	protein_coding	c.872G>A	p.Ser291Asn	1|1	27	1	1|1	16	1	1|1	27	1	1|1	29	1
1	174099583	G	A	missense_variant	Olfr427	ENSMUSG00000059371	transcript	ENSMUST00000080831	protein_coding	c.124G>A	p.Asp42Asn	1|1	17	1	1|1	15	1	1|1	16	1	1|1	32	1
1	174099602	A	C	missense_variant	Olfr427	ENSMUSG00000059371	transcript	ENSMUST00000080831	protein_coding	c.143A>C	p.Asp48Ala	1|1	18	1	1|1	18	1	1|1	18	1	1|1	30	1
1	174099784	G	A	missense_variant	Olfr427	ENSMUSG00000059371	transcript	ENSMUST00000080831	protein_coding	c.325G>A	p.Val109Ile	0|1	53	0.47	0|1	29	0.52	0|1	30	0.37	0|1	64	0.44
1	174099793	A	G	missense_variant	Olfr427	ENSMUSG00000059371	transcript	ENSMUST00000080831	protein_coding	c.334A>G	p.Ser112Gly	0|1	57	0.47	0|1	33	0.52	0|1	31	0.45	0|1	65	0.43
1	174099948	A	G	missense_variant	Olfr427	ENSMUSG00000059371	transcript	ENSMUST00000080831	protein_coding	c.489A>G	p.Ile163Met	0|1	48	0.6	0|1	44	0.48	0|1	59	0.39	0|1	64	0.56
1	174099958	C	T	missense_variant	Olfr427	ENSMUSG00000059371	transcript	ENSMUST00000080831	protein_coding	c.499C>T	p.Pro167Ser	0|1	48	0.58	0|1	45	0.49	0|1	61	0.39	0|1	64	0.59
1	174100309	G	T	missense_variant	Olfr427	ENSMUSG00000059371	transcript	ENSMUST00000080831	protein_coding	c.850G>T	p.Val284Phe	1|1	47	1	1|1	32	1	1|1	29	1	1|1	45	1
1	174136992	T	A	missense_variant	Olfr424	ENSMUSG00000051528	transcript	ENSMUST00000053941	protein_coding	c.247T>A	p.Ser83Thr	1|1	23	1	1|1	15	1	1|1	30	1	1|1	32	1
1	174137174	C	G	missense_variant	Olfr424	ENSMUSG00000051528	transcript	ENSMUST00000053941	protein_coding	c.429C>G	p.His143Gln	1|1	19	1	1|1	15	1	1|1	21	1	1|1	25	1
1	174137302	G	A	missense_variant	Olfr424	ENSMUSG00000051528	transcript	ENSMUST00000053941	protein_coding	c.557G>A	p.Arg186His	1|1	29	1	1|1	28	1	1|1	21	1	1|1	23	1
1	174152324	A	G	stop_lost	Olfr421-ps1	ENSMUSG00000091950	transcript	ENSMUST00000171570	protein_coding	c.807A>G	p.Ter269Trpext*?	1|1	19	1	1|1	18	1	1|1	20	1	1|1	28	1
1	174158892	G	A	missense_variant	Olfr420	ENSMUSG00000055033	transcript	ENSMUST00000068403	protein_coding	c.118G>A	p.Val40Ile	1|1	30	1	1|1	9	1	1|1	20	1	1|1	30	1
1	174159625	T	C	missense_variant	Olfr420	ENSMUSG00000055033	transcript	ENSMUST00000068403	protein_coding	c.851T>C	p.Phe284Ser	1|1	29	1	1|1	15	1	1|1	26	1	1|1	29	1
1	174174319	A	G	splice_region_variant&intron_variant	Spta1	ENSMUSG00000026532	transcript	ENSMUST00000027817	protein_coding	c.22-8A>G		1|1	19	1	1|1	22	1	1|1	24	1	1|1	27	1
1	174174324	C	T	splice_region_variant&intron_variant	Spta1	ENSMUSG00000026532	transcript	ENSMUST00000027817	protein_coding	c.22-3C>T		1|1	19	1	1|1	23	1	1|1	25	1	1|1	25	1
1	174175894	TG	T	splice_region_variant&intron_variant	Spta1	ENSMUSG00000026532	transcript	ENSMUST00000027817	protein_coding	c.384+8delG		1|1	30	1	1|1	19	1	1|1	23	1	1|1	16	1
1	174181140	A	G	splice_region_variant&intron_variant	Spta1	ENSMUSG00000026532	transcript	ENSMUST00000027817	protein_coding	c.806+3A>G		1|1	26	1	1|1	13	1	1|1	27	1	1|1	33	1
1	174185766	G	A	splice_region_variant&synonymous_variant	Spta1	ENSMUSG00000026532	transcript	ENSMUST00000027817	protein_coding	c.1242G>A	p.Lys414Lys	1|1	23	1	1|1	16	1	1|1	26	1	1|1	25	1
1	174185772	A	G	splice_region_variant&intron_variant	Spta1	ENSMUSG00000026532	transcript	ENSMUST00000027817	protein_coding	c.1242+6A>G		1|1	22	1	1|1	16	1	1|1	25	1	1|1	25	1
1	174190238	T	C	splice_region_variant&intron_variant	Spta1	ENSMUSG00000026532	transcript	ENSMUST00000027817	protein_coding	c.1482+5T>C		1|1	27	1	1|1	23	1	1|1	30	1	1|1	47	1
1	174198368	G	A	missense_variant	Spta1	ENSMUSG00000026532	transcript	ENSMUST00000027817	protein_coding	c.2221G>A	p.Val741Met	1|1	27	1	1|1	19	1	1|1	28	1	1|1	43	1
1	174198608	T	G	splice_region_variant&intron_variant	Spta1	ENSMUSG00000026532	transcript	ENSMUST00000027817	protein_coding	c.2458+3T>G		1|1	24	1	1|1	23	1	1|1	27	1	1|1	31	1
1	174205263	TC	T	splice_region_variant&intron_variant	Spta1	ENSMUSG00000026532	transcript	ENSMUST00000027817	protein_coding	c.2893-3delC		1|1	14	1	1|1	17	1	1|1	39	1	1|1	31	1
1	174207137	G	A	missense_variant	Spta1	ENSMUSG00000026532	transcript	ENSMUST00000027817	protein_coding	c.3131G>A	p.Arg1044Gln	1|1	30	1	1|1	9	1	1|1	33	1	1|1	34	1
1	174207140	A	G	missense_variant	Spta1	ENSMUSG00000026532	transcript	ENSMUST00000027817	protein_coding	c.3134A>G	p.Gln1045Arg	1|1	33	1	1|1	9	1	1|1	32	1	1|1	33	1
1	174208304	C	T	splice_region_variant&intron_variant	Spta1	ENSMUSG00000026532	transcript	ENSMUST00000027817	protein_coding	c.3183-8C>T		1|1	24	1	1|1	17	1	1|1	32	1	1|1	30	1
1	174219757	A	AT	splice_region_variant&intron_variant	Spta1	ENSMUSG00000026532	transcript	ENSMUST00000027817	protein_coding	c.4975-5dupT		1|1	28	1	1|1	17	1	1|1	28	1	1|1	24	1
1	174237777	C	T	splice_region_variant&intron_variant	Spta1	ENSMUSG00000026532	transcript	ENSMUST00000027817	protein_coding	c.5899-8C>T		1|1	23	1	1|1	18	1	1|1	18	1	1|1	24	1
1	174237778	T	G	splice_region_variant&intron_variant	Spta1	ENSMUSG00000026532	transcript	ENSMUST00000027817	protein_coding	c.5899-7T>G		1|1	23	1	1|1	18	1	1|1	18	1	1|1	24	1
1	174240192	T	A	missense_variant	Spta1	ENSMUSG00000026532	transcript	ENSMUST00000027817	protein_coding	c.6184T>A	p.Leu2062Met	1|1	24	1	1|1	17	1	1|1	43	1	1|1	26	1
1	174241034	T	A	splice_region_variant&intron_variant	Spta1	ENSMUSG00000026532	transcript	ENSMUST00000027817	protein_coding	c.6406-7T>A		1|1	22	1	1|1	26	1	1|1	24	1	1|1	25	1
1	174247325	T	G	splice_region_variant&intron_variant	Spta1	ENSMUSG00000026532	transcript	ENSMUST00000027817	protein_coding	c.7123-7T>G		1|1	29	1	1|1	21	1	1|1	21	1	1|1	50	1
1	174249989	C	T	missense_variant	Olfr419	ENSMUSG00000050788	transcript	ENSMUST00000061990	protein_coding	c.937G>A	p.Gly313Arg	1|1	31	1	1|1	15	1	1|1	16	1	1|1	33	1
1	174330630	G	C	missense_variant	Mptx1	ENSMUSG00000026531	transcript	ENSMUST00000027816	protein_coding	c.58G>C	p.Glu20Gln	1|1	26	1	1|1	24	1	1|1	21	1	1|1	16	1
1	174332301	A	G	missense_variant	Mptx1	ENSMUSG00000026531	transcript	ENSMUST00000027816	protein_coding	c.172A>G	p.Thr58Ala	1|1	27	1	1|1	14	1	1|1	15	1	1|1	22	1
1	174332352	AAC	A	frameshift_variant	Mptx1	ENSMUSG00000026531	transcript	ENSMUST00000027816	protein_coding	c.224_225delAC	p.Asn75fs	1|1	21	1	1|1	19	1	1|1	17	1	1|1	25	1
1	174332355	C	CTA	frameshift_variant	Mptx1	ENSMUSG00000026531	transcript	ENSMUST00000027816	protein_coding	c.226_227insTA	p.Gln76fs	1|1	21	1	1|1	19	1	1|1	17	1	1|1	25	1
1	174332418	A	T	missense_variant	Mptx1	ENSMUSG00000026531	transcript	ENSMUST00000027816	protein_coding	c.289A>T	p.Met97Leu	1|1	26	1	1|1	24	1	1|1	22	1	1|1	28	1
1	174332428	C	T	missense_variant	Mptx1	ENSMUSG00000026531	transcript	ENSMUST00000027816	protein_coding	c.299C>T	p.Thr100Ile	1|1	25	1	1|1	22	1	1|1	23	1	1|1	27	1
1	174332461	C	T	missense_variant	Mptx1	ENSMUSG00000026531	transcript	ENSMUST00000027816	protein_coding	c.332C>T	p.Ala111Val	1|1	25	1	1|1	17	1	1|1	29	1	1|1	26	1
1	174332488	G	T	missense_variant	Mptx1	ENSMUSG00000026531	transcript	ENSMUST00000027816	protein_coding	c.359G>T	p.Gly120Val	1|1	19	1	1|1	22	1	1|1	25	1	1|1	26	1
1	174332546	G	T	missense_variant	Mptx1	ENSMUSG00000026531	transcript	ENSMUST00000027816	protein_coding	c.417G>T	p.Lys139Asn	1|1	26	1	1|1	22	1	1|1	24	1	1|1	26	1
1	174332581	C	T	missense_variant	Mptx1	ENSMUSG00000026531	transcript	ENSMUST00000027816	protein_coding	c.452C>T	p.Thr151Ile	1|1	27	1	1|1	26	1	1|1	24	1	1|1	25	1
1	174332583	C	A	missense_variant	Mptx1	ENSMUSG00000026531	transcript	ENSMUST00000027816	protein_coding	c.454C>A	p.Leu152Ile	1|1	27	1	1|1	26	1	1|1	24	1	1|1	25	1
1	174332605	A	T	missense_variant	Mptx1	ENSMUSG00000026531	transcript	ENSMUST00000027816	protein_coding	c.476A>T	p.Tyr159Phe	1|1	24	1	1|1	27	1	1|1	25	1	1|1	27	1
1	174332767	C	T	missense_variant	Mptx1	ENSMUSG00000026531	transcript	ENSMUST00000027816	protein_coding	c.638C>T	p.Thr213Ile	1|1	24	1	1|1	16	1	1|1	33	1	1|1	19	1
1	174369670	T	G	missense_variant	Olfr417	ENSMUSG00000066672	transcript	ENSMUST00000085862	protein_coding	c.752T>G	p.Val251Gly	1|1	26	1	1|1	24	1	1|1	28	1	1|1	41	1
1	174391176	G	A	missense_variant	Olfr248	ENSMUSG00000059503	transcript	ENSMUST00000075329	protein_coding	c.106G>A	p.Ala36Thr	1|1	30	1	1|1	23	1	1|1	32	1	1|1	37	1
1	174391779	A	C	missense_variant	Olfr248	ENSMUSG00000059503	transcript	ENSMUST00000075329	protein_coding	c.709A>C	p.Thr237Pro	1|1	23	1	1|1	21	1	1|1	18	1	1|1	35	1
1	174391896	G	A	missense_variant	Olfr248	ENSMUSG00000059503	transcript	ENSMUST00000075329	protein_coding	c.826G>A	p.Val276Ile	1|1	35	1	1|1	23	1	1|1	24	1	1|1	53	1
1	174431342	G	A	missense_variant	Olfr414	ENSMUSG00000051509	transcript	ENSMUST00000053178	protein_coding	c.913G>A	p.Val305Ile	1|1	31	1	1|1	20	1	1|1	20	1	1|1	37	1
1	174448757	G	T	missense_variant	Olfr220	ENSMUSG00000066671	transcript	ENSMUST00000085861	protein_coding	c.133G>T	p.Ala45Ser	1|1	19	1	1|1	31	1	1|1	28	0.96	1|1	33	1
1	174449072	G	A	missense_variant	Olfr220	ENSMUSG00000066671	transcript	ENSMUST00000085861	protein_coding	c.448G>A	p.Ala150Thr	1|1	16	1	1|1	24	1	1|1	27	1	1|1	30	1
1	174501923	C	T	5_prime_UTR_premature_start_codon_gain_variant	Fmn2	ENSMUSG00000028354	transcript	ENSMUST00000030039	protein_coding	c.-123C>T		1|1	17	1	1|1	25	1	1|1	22	1	1|1	25	1
1	174502143	T	C	missense_variant	Fmn2	ENSMUSG00000028354	transcript	ENSMUST00000030039	protein_coding	c.98T>C	p.Ile33Thr	1|1	14	1	1|1	18	1	1|1	14	1	1|1	11	1
1	174503087	G	A	missense_variant	Fmn2	ENSMUSG00000028354	transcript	ENSMUST00000030039	protein_coding	c.1042G>A	p.Val348Met	1|1	13	1	1|1	11	1	1|1	26	1	1|1	21	1
1	174503160	T	C	missense_variant	Fmn2	ENSMUSG00000028354	transcript	ENSMUST00000030039	protein_coding	c.1115T>C	p.Val372Ala	1|1	10	1	1|1	13	1	1|1	23	1	1|1	17	1
1	174503334	G	C	missense_variant	Fmn2	ENSMUSG00000028354	transcript	ENSMUST00000030039	protein_coding	c.1289G>C	p.Arg430Pro	1|1	15	1	1|1	18	1	1|1	25	1	1|1	21	1
1	174503339	T	C	missense_variant	Fmn2	ENSMUSG00000028354	transcript	ENSMUST00000030039	protein_coding	c.1294T>C	p.Ser432Pro	1|1	16	1	1|1	19	1	1|1	26	1	1|1	20	1
1	174608698	T	C	missense_variant	Fmn2	ENSMUSG00000028354	transcript	ENSMUST00000030039	protein_coding	c.2234T>C	p.Leu745Pro	1|1	24	1	1|1	34	1	1|1	19	1	1|1	32	1
1	174609294	T	C	missense_variant	Fmn2	ENSMUSG00000028354	transcript	ENSMUST00000030039	protein_coding	c.2830T>C	p.Ser944Pro	1|1	14	1	1|1	20	1	1|1	12	1	1|1	29	1
1	174609301	T	C	missense_variant	Fmn2	ENSMUSG00000028354	transcript	ENSMUST00000030039	protein_coding	c.2837T>C	p.Leu946Pro	1|1	14	1	1|1	20	1	1|1	12	1	1|1	29	1
1	174609582	G	A	missense_variant	Fmn2	ENSMUSG00000028354	transcript	ENSMUST00000030039	protein_coding	c.3118G>A	p.Val1040Met	1|1	24	1	1|1	9	1	1|1	18	1	1|1	28	0.96
1	174609889	T	C	missense_variant	Fmn2	ENSMUSG00000028354	transcript	ENSMUST00000030039	protein_coding	c.3425T>C	p.Leu1142Pro	1|1	18	1	1|1	32	1	1|1	21	1	1|1	38	1
1	174666635	C	T	splice_region_variant&intron_variant	Fmn2	ENSMUSG00000028354	transcript	ENSMUST00000030039	protein_coding	c.3722-8C>T		1|1	27	1	1|1	17	1	1|1	24	1	1|1	25	1
1	174694189	A	G	splice_region_variant&synonymous_variant	Fmn2	ENSMUSG00000028354	transcript	ENSMUST00000030039	protein_coding	c.3786A>G	p.Arg1262Arg	1|1	35	1	1|1	29	1	1|1	26	1	1|1	29	1
1	175079401	C	T	splice_region_variant&intron_variant	Rgs7	ENSMUSG00000026527	transcript	ENSMUST00000027812	protein_coding	c.1269+4G>A		1|1	25	1	1|1	17	1	1|1	23	1	1|1	35	1
1	175091096	T	C	splice_region_variant&intron_variant	Rgs7	ENSMUSG00000026527	transcript	ENSMUST00000027812	protein_coding	c.685-4A>G		1|1	17	1	1|1	20	1	1|1	19	1	1|1	32	1
1	175149710	A	G	splice_region_variant&intron_variant	Rgs7	ENSMUSG00000026527	transcript	ENSMUST00000027812	protein_coding	c.334-7T>C		1|1	34	1	1|1	14	1	1|1	20	1	1|1	18	1
1	175153124	T	C	splice_region_variant&synonymous_variant	Rgs7	ENSMUSG00000026527	transcript	ENSMUST00000027812	protein_coding	c.333A>G	p.Gln111Gln	1|1	28	1	1|1	23	1	1|1	18	1	1|1	33	1
1	175189170	C	T	splice_region_variant&intron_variant	Rgs7	ENSMUSG00000026527	transcript	ENSMUST00000027812	protein_coding	c.226+7G>A		1|1	27	1	1|1	17	1	1|1	19	1	1|1	41	1
1	175633626	T	C	splice_region_variant&intron_variant	Kmo	ENSMUSG00000039783	transcript	ENSMUST00000150646	processed_transcript	n.402+7T>C		1|1	21	1	1|1	9	1	1|1	17	1	1|1	26	1
1	175639094	T	C	splice_region_variant&intron_variant	Kmo	ENSMUSG00000039783	transcript	ENSMUST00000040250	protein_coding	c.223-6T>C		0/1	26	0.77	0/1	29	0.59	0/1	15	0.8	0/1	29	0.66
1	175687272	G	T	missense_variant	Chml	ENSMUSG00000078185	transcript	ENSMUST00000104984	protein_coding	c.1082C>A	p.Thr361Asn	1|1	39	1	1|1	32	1	1|1	20	1	1|1	28	1
1	175795167	G	A	missense_variant	Wdr64	ENSMUSG00000026523	transcript	ENSMUST00000171939	protein_coding	c.2479G>A	p.Val827Ile	1|1	25	1	1|1	21	1	1|1	19	1	1|1	26	1
1	175882886	T	TTCTGTA	splice_region_variant&intron_variant	Exo1	ENSMUSG00000039748	transcript	ENSMUST00000039725	protein_coding	c.-13-7_-13-6insTGTATC		1|1	36	1	1|1	16	1	1|1	30	1	1|1	36	1
1	175896185	A	G	missense_variant	Exo1	ENSMUSG00000039748	transcript	ENSMUST00000039725	protein_coding	c.1096A>G	p.Thr366Ala	1|1	27	1	1|1	17	1	1|1	25	1	1|1	25	1
1	175901041	C	T	missense_variant	Exo1	ENSMUSG00000039748	transcript	ENSMUST00000039725	protein_coding	c.1670C>T	p.Thr557Met	1|1	15	1	1|1	16	1	1|1	25	1	1|1	23	1
1	175901313	A	C	missense_variant	Exo1	ENSMUSG00000039748	transcript	ENSMUST00000039725	protein_coding	c.1942A>C	p.Lys648Gln	1|1	19	1	1|1	21	1	1|1	23	1	1|1	27	1
1	175901326	T	C	missense_variant	Exo1	ENSMUSG00000039748	transcript	ENSMUST00000039725	protein_coding	c.1955T>C	p.Leu652Pro	1|1	21	1	1|1	21	1	1|1	23	1	1|1	28	1
1	175901368	C	T	missense_variant	Exo1	ENSMUSG00000039748	transcript	ENSMUST00000039725	protein_coding	c.1997C>T	p.Ser666Leu	1|1	24	1	1|1	22	1	1|1	15	1	1|1	32	1
1	175978486	G	T	missense_variant	B020018G12Rik	ENSMUSG00000078184	transcript	ENSMUST00000104983	protein_coding	c.424C>A	p.Gln142Lys	1|1	17	1	1|1	20	1	1|1	31	1	1|1	25	1
1	175978607	A	AT	frameshift_variant	B020018G12Rik	ENSMUSG00000078184	transcript	ENSMUST00000104983	protein_coding	c.302dupA	p.Asn101fs	1|1	22	1	1|1	16	1	1|1	18	1	1|1	25	1
1	175978758	T	C	missense_variant	B020018G12Rik	ENSMUSG00000078184	transcript	ENSMUST00000104983	protein_coding	c.152A>G	p.Gln51Arg	1|1	18	1	1|1	19	1	1|1	16	1	1|1	31	1
1	175978974	T	A	5_prime_UTR_premature_start_codon_gain_variant	B020018G12Rik	ENSMUSG00000078184	transcript	ENSMUST00000104983	protein_coding	c.-65A>T		1|1	21	1	1|1	20	1	1|1	20	1	1|1	30	1
1	175979069	C	A	5_prime_UTR_premature_start_codon_gain_variant	B020018G12Rik	ENSMUSG00000078184	transcript	ENSMUST00000104983	protein_coding	c.-160G>T		1|1	30	1	1|1	18	1	1|1	25	1	1|1	30	1
1	176261521	C	A	splice_acceptor_variant&intron_variant	Pld5	ENSMUSG00000055214	transcript	ENSMUST00000111166	protein_coding	c.190-1G>T		1|1	30	1	1|1	23	1	1|1	21	1	1|1	37	1
1	176261527	G	T	splice_region_variant&intron_variant	Pld5	ENSMUSG00000055214	transcript	ENSMUST00000111166	protein_coding	c.190-7C>A		1|1	30	1	1|1	21	1	1|1	21	1	1|1	37	1
1	176772419	CATCTATCTATCTATCT	C	gene_fusion	Cep170&Mir350	ENSMUSG00000057335&ENSMUSG00000065573	gene_variant	ENSMUSG00000065573		n.176772435_176772420delAGATAGATAGATAGAT		1|1	14	1	1|1	21	1	1|1	11	1	1|1	24	1
1	176782254	T	C	missense_variant	Cep170	ENSMUSG00000057335	transcript	ENSMUST00000057037	protein_coding	c.490A>G	p.Met164Val	1|1	21	1	1|1	25	1	1|1	21	1	1|1	32	1
1	176792633	A	G	splice_region_variant&intron_variant	Cep170	ENSMUSG00000057335	transcript	ENSMUST00000057037	protein_coding	c.106-8T>C		1|1	25	1	1|1	25	1	1|1	23	1	1|1	35	0.97
1	176826202	A	G	missense_variant	Sdccag8	ENSMUSG00000026504	transcript	ENSMUST00000027785	protein_coding	c.224A>G	p.Asn75Ser	1|1	27	1	1|1	21	1	1|1	25	1	1|1	36	1
1	176840343	C	T	missense_variant	Sdccag8	ENSMUSG00000026504	transcript	ENSMUST00000027785	protein_coding	c.605C>T	p.Ala202Val	1|1	33	1	1|1	21	1	1|1	20	1	1|1	37	1
1	176861909	C	A	missense_variant	Sdccag8	ENSMUSG00000026504	transcript	ENSMUST00000056773	protein_coding	c.1004C>A	p.Pro335Gln	1|1	29	1	1|1	21	1	1|1	30	1	1|1	37	1
1	176861963	T	G	missense_variant	Sdccag8	ENSMUSG00000026504	transcript	ENSMUST00000056773	protein_coding	c.1058T>G	p.Leu353Arg	1|1	24	1	1|1	23	1	1|1	31	1	1|1	31	1
1	176929215	A	G	splice_region_variant&intron_variant	Gm15423	ENSMUSG00000087082	transcript	ENSMUST00000150600	antisense	n.220-6T>C		1|1	20	1	1|1	35	1	1|1	24	1	1|1	22	1
1	178276503	AC	A	splice_acceptor_variant&splice_region_variant&intron_variant	4930527J03Rik	ENSMUSG00000070489	transcript	ENSMUST00000094270	pseudogene	n.133-1delG		1|1	18	1	1|1	24	1	1|1	18	1	1|1	24	1
1	179734356	C	A	splice_region_variant&intron_variant	Gm1305	ENSMUSG00000087236	transcript	ENSMUST00000131716	protein_coding	c.396+7G>T		1|1	36	1	1|1	31	1	1|1	25	1	1|1	27	1
1	181123924	C	T	missense_variant	Nvl	ENSMUSG00000026516	transcript	ENSMUST00000027797	protein_coding	c.1120G>A	p.Val374Ile	0/1	52	0.37	0/1	38	0.24	0/1	51	0.41	0/1	44	0.39
1	182973389	G	A	missense_variant	Tlr5	ENSMUSG00000079164	transcript	ENSMUST00000110997	protein_coding	c.257G>A	p.Arg86Gln	1|1	20	1	1|1	29	1	1|1	29	1	1|1	20	1
1	182975702	G	C	missense_variant	Tlr5	ENSMUSG00000079164	transcript	ENSMUST00000110997	protein_coding	c.2570G>C	p.Gly857Ala	1|1	23	1	1|1	33	1	1|1	22	1	1|1	42	1
1	183087367	C	T	missense_variant	Disp1	ENSMUSG00000030768	transcript	ENSMUST00000003035	protein_coding	c.3488G>A	p.Arg1163Lys	1|1	26	1	1|1	44	1	1|1	26	1	1|1	18	1
1	183357227	C	G	missense_variant	Mia3	ENSMUSG00000056050	transcript	ENSMUST00000069922	protein_coding	c.2143G>C	p.Val715Leu	1|1	16	1	1|1	30	1	1|1	16	1	1|1	36	1
1	183357437	C	T	missense_variant	Mia3	ENSMUSG00000056050	transcript	ENSMUST00000069922	protein_coding	c.1933G>A	p.Gly645Ser	1|1	36	1	1|1	34	1	1|1	31	1	1|1	39	1
1	183357464	G	C	missense_variant	Mia3	ENSMUSG00000056050	transcript	ENSMUST00000069922	protein_coding	c.1906C>G	p.Gln636Glu	1|1	40	1	1|1	31	1	1|1	39	1	1|1	41	1
1	183357824	A	G	missense_variant	Mia3	ENSMUSG00000056050	transcript	ENSMUST00000069922	protein_coding	c.1546T>C	p.Ser516Pro	1|1	33	1	1|1	33	1	1|1	36	1	1|1	38	1
1	183358109	T	C	missense_variant	Mia3	ENSMUSG00000056050	transcript	ENSMUST00000069922	protein_coding	c.1261A>G	p.Ser421Gly	1|1	27	1	1|1	45	1	1|1	25	1	1|1	31	1
1	183358211	G	T	missense_variant	Mia3	ENSMUSG00000056050	transcript	ENSMUST00000069922	protein_coding	c.1159C>A	p.Pro387Thr	1|1	24	1	1|1	31	1	1|1	24	1	1|1	38	1
1	183358693	A	G	missense_variant	Mia3	ENSMUSG00000056050	transcript	ENSMUST00000069922	protein_coding	c.677T>C	p.Val226Ala	1|1	20	1	1|1	38	1	1|1	21	1	1|1	37	1
1	183358720	C	T	missense_variant	Mia3	ENSMUSG00000056050	transcript	ENSMUST00000069922	protein_coding	c.650G>A	p.Ser217Asn	1|1	24	1	1|1	37	1	1|1	25	1	1|1	39	1
1	183358724	T	C	missense_variant	Mia3	ENSMUSG00000056050	transcript	ENSMUST00000069922	protein_coding	c.646A>G	p.Thr216Ala	1|1	25	1	1|1	36	1	1|1	25	1	1|1	38	1
1	183358768	T	C	missense_variant	Mia3	ENSMUSG00000056050	transcript	ENSMUST00000069922	protein_coding	c.602A>G	p.Glu201Gly	1|1	25	1	1|1	32	1	1|1	21	1	1|1	38	1
1	183358873	T	C	missense_variant	Mia3	ENSMUSG00000056050	transcript	ENSMUST00000069922	protein_coding	c.497A>G	p.Lys166Arg	1|1	26	1	1|1	28	1	1|1	24	1	1|1	33	1
1	183418514	G	T	start_lost	Hhipl2	ENSMUSG00000053461	transcript	ENSMUST00000065900	protein_coding	c.3G>T	p.Met1?	1|1	3	1	1|1	20	1	1|1	15	1	1|1	12	1
1	183425048	T	C	splice_region_variant&intron_variant	Hhipl2	ENSMUSG00000053461	transcript	ENSMUST00000065900	protein_coding	c.972-7T>C		1|1	16	1	1|1	37	1	1|1	25	1	1|1	39	1
1	183682152	C	T	missense_variant	Gm8214	ENSMUSG00000090533	transcript	ENSMUST00000172123	protein_coding	c.43G>A	p.Val15Met	1|1	26	1	1|1	19	1	1|1	27	1	1|1	33	1
1	184013423	A	G	5_prime_UTR_premature_start_codon_gain_variant	Dusp10	ENSMUSG00000039384	transcript	ENSMUST00000139839	protein_coding	c.-167A>G		1|1	23	1	1|1	18	1	1|1	28	1	1|1	29	1
1	184013437	A	C	splice_region_variant&intron_variant	Dusp10	ENSMUSG00000039384	transcript	ENSMUST00000139839	protein_coding	c.-156+3A>C		1|1	23	1	1|1	19	1	1|1	26	1	1|1	28	1
1	184013613	G	A	splice_region_variant&intron_variant	Dusp10	ENSMUSG00000039384	transcript	ENSMUST00000139839	protein_coding	c.-155-5G>A		1|1	16	1	1|1	22	1	1|1	12	1	1|1	13	1
1	184801913	C	T	missense_variant	Marc1	ENSMUSG00000026621	transcript	ENSMUST00000110992	protein_coding	c.757G>A	p.Val253Ile	1|1	16	1	1|1	35	1	1|1	32	1	1|1	39	1
1	184807145	G	A	missense_variant	Marc1	ENSMUSG00000026621	transcript	ENSMUST00000110992	protein_coding	c.328C>T	p.Arg110Trp	1|1	25	1	1|1	35	1	1|1	24	1	1|1	22	1
1	184905583	C	T	missense_variant	Mark1	ENSMUSG00000026620	transcript	ENSMUST00000027929	protein_coding	c.1808G>A	p.Arg603His	1|1	20	1	1|1	25	1	1|1	25	1	1|1	19	1
1	184914634	A	G	splice_region_variant&intron_variant	Mark1	ENSMUSG00000026620	transcript	ENSMUST00000027929	protein_coding	c.1010-5T>C		1|1	37	1	1|1	35	1	1|1	27	1	1|1	50	1
1	185238775	C	T	splice_region_variant&intron_variant	Rab3gap2	ENSMUSG00000039318	transcript	ENSMUST00000069652	protein_coding	c.610-4C>T		1|1	23	1	1|1	29	0.97	1|1	34	1	1|1	27	1
1	185251814	A	G	splice_region_variant&intron_variant	Rab3gap2	ENSMUSG00000039318	transcript	ENSMUST00000069652	protein_coding	c.1628+7A>G		1|1	26	1	1|1	13	1	1|1	17	1	1|1	31	1
1	185252112	G	C	splice_region_variant&synonymous_variant	Rab3gap2	ENSMUSG00000039318	transcript	ENSMUST00000069652	protein_coding	c.1710G>C	p.Pro570Pro	1|1	19	1	1|1	38	1	1|1	17	1	1|1	48	1
1	185259500	G	A	missense_variant	Rab3gap2	ENSMUSG00000039318	transcript	ENSMUST00000069652	protein_coding	c.2182G>A	p.Val728Ile	1|1	31	1	1|1	30	1	1|1	17	1	1|1	27	1
1	185260433	G	A	missense_variant	Rab3gap2	ENSMUSG00000039318	transcript	ENSMUST00000069652	protein_coding	c.2242G>A	p.Glu748Lys	1|1	22	1	1|1	36	1	1|1	25	1	1|1	27	1
1	185262674	T	C	splice_region_variant&intron_variant	Rab3gap2	ENSMUSG00000039318	transcript	ENSMUST00000069652	protein_coding	c.2414-5T>C		1|1	13	1	1|1	26	1	1|1	29	1	1|1	54	1
1	185263644	T	A	missense_variant	Rab3gap2	ENSMUSG00000039318	transcript	ENSMUST00000069652	protein_coding	c.2588T>A	p.Val863Glu	1|1	22	1	1|1	22	1	1|1	22	1	1|1	18	1
1	185341252	C	T	synonymous_variant	Bpnt1	ENSMUSG00000026617	transcript	ENSMUST00000027916	protein_coding	c.150C>T	p.Ala50Ala	0/1	28	0.64	0/1	44	0.77	0/1	26	0.88	0/1	34	0.74
1	185352198	C	T	missense_variant	Bpnt1	ENSMUSG00000026617	transcript	ENSMUST00000027916	protein_coding	c.491C>T	p.Ala164Val	1|1	21	1	1|1	25	1	1|1	24	1	1|1	30	1
1	185352276	A	G	missense_variant	Bpnt1	ENSMUSG00000026617	transcript	ENSMUST00000027916	protein_coding	c.569A>G	p.His190Arg	0/1	51	0.39	0/1	43	0.56	0/1	49	0.37	0/1	59	0.58
1	185352278	A	T	missense_variant	Bpnt1	ENSMUSG00000026617	transcript	ENSMUST00000027916	protein_coding	c.571A>T	p.Ile191Phe	0/1	53	0.58	0/1	43	0.44	0/1	49	0.63	0/1	59	0.42
1	185352356	C	T	stop_gained	Bpnt1	ENSMUSG00000026617	transcript	ENSMUST00000027916	protein_coding	c.649C>T	p.Arg217*	0/1	42	0.45	0/1	39	0.15	0/1	41	0.41	0/1	47	0.3
1	185362569	A	C	splice_region_variant&intron_variant	4930532G15Rik	ENSMUSG00000097261	transcript	ENSMUST00000180632	lincRNA	n.290+7T>G		1|1	29	1	1|1	18	1	1|1	27	1	1|1	25	1
1	185369683	G	A	splice_region_variant&intron_variant	Eprs	ENSMUSG00000026615	transcript	ENSMUST00000046514	protein_coding	c.231+7G>A		1|1	23	1	1|1	24	1	1|1	34	1	1|1	23	1
1	185370937	A	G	missense_variant	Eprs	ENSMUSG00000026615	transcript	ENSMUST00000046514	protein_coding	c.280A>G	p.Arg94Gly	1|1	30	1	1|1	41	1	1|1	37	1	1|1	34	1
1	185373044	A	G	missense_variant	Eprs	ENSMUSG00000026615	transcript	ENSMUST00000046514	protein_coding	c.515A>G	p.Asn172Ser	1|1	19	1	1|1	22	1	1|1	15	1	1|1	32	1
1	185397056	G	A	splice_region_variant&intron_variant	Eprs	ENSMUSG00000026615	transcript	ENSMUST00000046514	protein_coding	c.1743-4G>A		1|1	27	1	1|1	40	1	1|1	15	1	1|1	40	1
1	185397169	T	C	missense_variant	Eprs	ENSMUSG00000026615	transcript	ENSMUST00000046514	protein_coding	c.1852T>C	p.Ser618Pro	1|1	26	1	1|1	24	1	1|1	29	1	1|1	37	1
1	186100241	C	T	missense_variant	Lyplal1	ENSMUSG00000039246	transcript	ENSMUST00000045388	protein_coding	c.316G>A	p.Val106Ile	1|1	20	1	1|1	20	1	1|1	22	1	1|1	34	1
1	187125323	C	T	splice_region_variant&intron_variant	1700007P06Rik	ENSMUSG00000089730	transcript	ENSMUST00000160380	antisense	n.178+8C>T		1|1	18	1	1|1	21	1	1|1	19	1	1|1	23	1
1	187142840	A	G	5_prime_UTR_premature_start_codon_gain_variant	Spata17	ENSMUSG00000026611	transcript	ENSMUST00000183996	protein_coding	c.-39T>C		1|1	17	1	1|1	15	1	1|1	24	1	1|1	22	1
1	187142925	C	T	5_prime_UTR_premature_start_codon_gain_variant	Spata17	ENSMUSG00000026611	transcript	ENSMUST00000184543	protein_coding	c.-124G>A		1|1	11	1	1|1	20	1	1|1	23	1	1|1	23	1
1	188531666	T	C	missense_variant	Ush2a	ENSMUSG00000026609	transcript	ENSMUST00000060479	protein_coding	c.4739T>C	p.Leu1580Pro	1|1	20	1	1|1	15	1	1|1	14	1	1|1	25	1
1	188576187	T	C	missense_variant	Ush2a	ENSMUSG00000026609	transcript	ENSMUST00000060479	protein_coding	c.6032T>C	p.Ile2011Thr	1|1	20	1	1|1	11	1	1|1	12	1	1|1	22	1
1	188626591	G	A	missense_variant	Ush2a	ENSMUSG00000026609	transcript	ENSMUST00000060479	protein_coding	c.6313G>A	p.Ala2105Thr	1|1	20	1	1|1	20	1	1|1	29	1	1|1	25	1
1	188626705	A	G	missense_variant	Ush2a	ENSMUSG00000026609	transcript	ENSMUST00000060479	protein_coding	c.6427A>G	p.Thr2143Ala	1|1	30	1	1|1	23	1	1|1	25	1	1|1	29	1
1	188628608	T	C	missense_variant	Ush2a	ENSMUSG00000026609	transcript	ENSMUST00000060479	protein_coding	c.6524T>C	p.Ile2175Thr	1|1	12	1	1|1	20	1	1|1	13	1	1|1	28	1
1	188628654	A	C	missense_variant	Ush2a	ENSMUSG00000026609	transcript	ENSMUST00000060479	protein_coding	c.6570A>C	p.Lys2190Asn	1|1	17	1	1|1	22	1	1|1	16	1	1|1	26	1
1	188633717	A	G	missense_variant	Ush2a	ENSMUSG00000026609	transcript	ENSMUST00000060479	protein_coding	c.6767A>G	p.Glu2256Gly	1|1	23	1	1|1	26	1	1|1	15	1	1|1	30	1
1	188648428	GAGT	G	splice_region_variant&intron_variant	Ush2a	ENSMUSG00000026609	transcript	ENSMUST00000060479	protein_coding	c.6930+7_6930+9delAGT		1|1	23	1	1|1	27	1	1|1	23	1	1|1	20	1
1	188864735	A	G	missense_variant	Ush2a	ENSMUSG00000026609	transcript	ENSMUST00000060479	protein_coding	c.11671A>G	p.Ser3891Gly	1|1	10	1	1|1	19	1	1|1	28	1	1|1	28	1
1	189656884	T	C	missense_variant	Cenpf	ENSMUSG00000026605	transcript	ENSMUST00000171929	protein_coding	c.4750A>G	p.Lys1584Glu	1|1	32	1	1|1	23	1	1|1	25	1	1|1	35	1
1	189657653	G	C	missense_variant	Cenpf	ENSMUSG00000026605	transcript	ENSMUST00000171929	protein_coding	c.3981C>G	p.Asp1327Glu	0/1	22	0.32	0/1	33	0.39	0/1	26	0.27	0/1	38	0.32
1	189855034	A	G	missense_variant	Ptpn14	ENSMUSG00000026604	transcript	ENSMUST00000027898	protein_coding	c.2660A>G	p.His887Arg	1|1	26	1	1|1	32	1	1|1	28	1	1|1	25	1
1	191025931	T	C	missense_variant	Mfsd7b	ENSMUSG00000066595	transcript	ENSMUST00000085635	protein_coding	c.163A>G	p.Ile55Val	1|1	11	1	1|1	17	1	1|1	9	1	1|1	20	1
1	191039617	C	T	missense_variant	1700022P22Rik	ENSMUSG00000057072	transcript	ENSMUST00000077889	protein_coding	c.35C>T	p.Thr12Ile	1|1	38	1	1|1	40	1	1|1	31	1	1|1	46	1
1	191042897	G	A	stop_retained_variant	1700022P22Rik	ENSMUSG00000057072	transcript	ENSMUST00000077889	protein_coding	c.293G>A	p.Ter98Ter	1|1	29	1	1|1	42	1	1|1	34	1	1|1	45	1
1	191045842	T	C	splice_region_variant	Tatdn3	ENSMUSG00000026632	transcript	ENSMUST00000110891	protein_coding	c.*468A>G		1|1	30	1	1|1	45	1	1|1	25	1	1|1	16	1
1	191052912	G	A	missense_variant	Tatdn3	ENSMUSG00000026632	transcript	ENSMUST00000110893	protein_coding	c.539C>T	p.Ala180Val	1|1	18	1	1|1	41	1	1|1	28	1	1|1	41	1
1	191052967	T	C	missense_variant	Tatdn3	ENSMUSG00000026632	transcript	ENSMUST00000110893	protein_coding	c.484A>G	p.Lys162Glu	1|1	17	1	1|1	41	1	1|1	24	1	1|1	30	1
1	191058781	A	G	splice_region_variant&non_coding_transcript_exon_variant	Tatdn3	ENSMUSG00000026632	transcript	ENSMUST00000143876	processed_transcript	n.342T>C		1|1	30	1	1|1	32	1	1|1	22	1	1|1	27	1
1	191058919	T	C	splice_region_variant&intron_variant	Tatdn3	ENSMUSG00000026632	transcript	ENSMUST00000110893	protein_coding	c.165-8A>G		1|1	29	1	1|1	35	1	1|1	25	1	1|1	35	1
1	191082292	C	T	missense_variant	Nsl1	ENSMUSG00000062510	transcript	ENSMUST00000078259	protein_coding	c.689C>T	p.Ser230Phe	1|1	30	1	1|1	35	1	1|1	23	1	1|1	37	1
1	191082306	C	T	missense_variant	Nsl1	ENSMUSG00000062510	transcript	ENSMUST00000078259	protein_coding	c.703C>T	p.Arg235Cys	1|1	27	1	1|1	35	1	1|1	21	1	1|1	36	1
1	191082360	G	A	missense_variant	Nsl1	ENSMUSG00000062510	transcript	ENSMUST00000078259	protein_coding	c.757G>A	p.Asp253Asn	1|1	32	1	1|1	31	1	1|1	18	1	1|1	34	1
1	191098502	T	C	missense_variant	Batf3	ENSMUSG00000026630	transcript	ENSMUST00000027943	protein_coding	c.44T>C	p.Val15Ala	1|1	18	1	1|1	21	1	1|1	12	1	1|1	15	1
1	191575479	C	A	5_prime_UTR_premature_start_codon_gain_variant	Dtl	ENSMUSG00000037474	transcript	ENSMUST00000027933	protein_coding	c.-79G>T		1|1	14	1	1|1	14	1	1|1	22	1	1|1	14	1
1	191613213	T	A	splice_region_variant&intron_variant	Ints7	ENSMUSG00000037461	transcript	ENSMUST00000045450	protein_coding	c.2010+4T>A		1|1	21	1	1|1	20	1	1|1	23	1	1|1	45	1
1	191718535	C	CCCG	disruptive_inframe_insertion	Lpgat1	ENSMUSG00000026623	transcript	ENSMUST00000110856	protein_coding	c.47_49dupCCG	p.Ala16dup	1|1	14	1	1|1	8	1	1|1	15	1	1|1	24	1
1	191822255	A	C	missense_variant	Nek2	ENSMUSG00000026622	transcript	ENSMUST00000027931	protein_coding	c.205A>C	p.Ser69Arg	1|1	18	1	1|1	35	1	1|1	23	1	1|1	38	1
1	191827204	T	A	missense_variant	Nek2	ENSMUSG00000026622	transcript	ENSMUST00000027931	protein_coding	c.820T>A	p.Leu274Met	1|1	21	1	1|1	32	1	1|1	27	1	1|1	35	1
1	191898611	T	G	splice_region_variant&intron_variant	1700034H15Rik	ENSMUSG00000055833	transcript	ENSMUST00000140401	processed_transcript	n.316+7A>C		1|1	32	1	1|1	27	1	1|1	21	1	1|1	38	1
1	192148917	A	G	splice_region_variant&non_coding_transcript_exon_variant	Gm10516	ENSMUSG00000097316	transcript	ENSMUST00000180598	lincRNA	n.504A>G		1|1	24	1	1|1	36	1	1|1	47	1	1|1	24	1
1	192505573	A	G	missense_variant	Kcnh1	ENSMUSG00000058248	transcript	ENSMUST00000078470	protein_coding	c.2422A>G	p.Met808Val	1|1	28	1	1|1	42	1	1|1	23	1	1|1	27	1
1	192513918	T	C	missense_variant	Hhat	ENSMUSG00000037375	transcript	ENSMUST00000044190	protein_coding	c.1466A>G	p.Asp489Gly	1|1	18	1	1|1	29	1	1|1	22	1	1|1	31	1
1	192716974	A	G	missense_variant	Hhat	ENSMUSG00000037375	transcript	ENSMUST00000128619	protein_coding	c.857T>C	p.Val286Ala	1|1	22	1	1|1	30	1	1|1	21	1	1|1	29	1
1	192741517	G	A	missense_variant	Hhat	ENSMUSG00000037375	transcript	ENSMUST00000128619	protein_coding	c.266C>T	p.Thr89Ile	1|1	16	1	1|1	25	1	1|1	33	1	1|1	36	1
1	192741628	G	A	splice_region_variant&intron_variant	Hhat	ENSMUSG00000037375	transcript	ENSMUST00000128619	protein_coding	c.160-5C>T		1|1	18	1	1|1	19	1	1|1	34	1	1|1	28	1
1	192748877	T	G	splice_region_variant&intron_variant	Hhat	ENSMUSG00000037375	transcript	ENSMUST00000128619	protein_coding	c.159+4A>C		1|1	19	1	1|1	33	1	1|1	29	1	1|1	36	1
1	192748909	A	G	missense_variant	Hhat	ENSMUSG00000037375	transcript	ENSMUST00000128619	protein_coding	c.131T>C	p.Met44Thr	1|1	21	1	1|1	33	1	1|1	32	1	1|1	37	1
1	192759752	C	T	missense_variant	Hhat	ENSMUSG00000037375	transcript	ENSMUST00000128619	protein_coding	c.10G>A	p.Gly4Arg	1|1	24	1	1|1	28	1	1|1	25	1	1|1	41	1
1	193027022	TA	T	splice_region_variant&intron_variant	Syt14	ENSMUSG00000016200	transcript	ENSMUST00000016344	protein_coding	c.14-6delT		1|1	25	1	1|1	9	1	1|1	17	0.94	1|1	21	1
1	193161793	A	C	missense_variant	Irf6	ENSMUSG00000026638	transcript	ENSMUST00000076521	protein_coding	c.355A>C	p.Thr119Pro	1|1	26	1	1|1	32	1	1|1	27	1	1|1	42	1
1	193174417	C	T	missense_variant	A130010J15Rik	ENSMUSG00000079144	transcript	ENSMUST00000110831	protein_coding	c.76C>T	p.Pro26Ser	1|1	15	1	1|1	26	1	1|1	15	1	1|1	50	1
1	193184608	G	A	splice_region_variant&intron_variant	Traf3ip3	ENSMUSG00000037318	transcript	ENSMUST00000043550	protein_coding	c.919-4C>T		1|1	25	1	1|1	41	1	1|1	30	1	1|1	39	1
1	193194849	T	G	missense_variant&splice_region_variant	Traf3ip3	ENSMUSG00000037318	transcript	ENSMUST00000043550	protein_coding	c.555A>C	p.Lys185Asn	1|1	21	1	1|1	32	1	1|1	36	1	1|1	33	1
1	193197728	G	A	missense_variant	Traf3ip3	ENSMUSG00000037318	transcript	ENSMUST00000043550	protein_coding	c.292C>T	p.Leu98Phe	1|1	15	1	1|1	12	1	1|1	14	1	1|1	10	1
1	193241325	C	T	splice_region_variant&intron_variant	Hsd11b1	ENSMUSG00000016194	transcript	ENSMUST00000016338	protein_coding	c.219+7G>A		1|1	17	1	1|1	14	1	1|1	23	1	1|1	25	1
1	193303290	G	T	splice_acceptor_variant&intron_variant	Lamb3	ENSMUSG00000026639	transcript	ENSMUST00000162180	processed_transcript	n.131-1G>T		1|1	18	1	1|1	30	1	1|1	34	1	1|1	35	1
1	193330952	T	C	splice_region_variant&intron_variant	Lamb3	ENSMUSG00000026639	transcript	ENSMUST00000016315	protein_coding	c.1476+8T>C		1|1	30	1	1|1	30	1	1|1	20	1	1|1	28	1
1	193334991	G	A	missense_variant	Lamb3	ENSMUSG00000026639	transcript	ENSMUST00000016315	protein_coding	c.2489G>A	p.Arg830Gln	1|1	21	1	1|1	32	1	1|1	20	1	1|1	30	1
1	193347394	C	T	missense_variant	Camk1g	ENSMUSG00000016179	transcript	ENSMUST00000016323	protein_coding	c.1397G>A	p.Cys466Tyr	1|1	31	1	1|1	42	1	1|1	25	1	1|1	24	1
1	193353838	T	C	missense_variant	Camk1g	ENSMUSG00000016179	transcript	ENSMUST00000163202	protein_coding	c.425A>G	p.Asp142Gly	1|1	25	1	1|1	38	1	1|1	31	1	1|1	25	1
1	195166209	A	C	splice_region_variant&intron_variant	Cr2	ENSMUSG00000094924	transcript	ENSMUST00000043104	protein_coding	c.937+8T>G		1|1	26	1	1|1	20	1	1|1	26	1	1|1	26	1
10	3120209	A	G	missense_variant	9230019H11Rik	ENSMUSG00000071434	transcript	ENSMUST00000095874	protein_coding	c.4A>G	p.Thr2Ala	1|1	31	1	1|1	32	1	1|1	20	1	1|1	27	1
10	3120231	A	G	missense_variant	9230019H11Rik	ENSMUSG00000071434	transcript	ENSMUST00000095874	protein_coding	c.26A>G	p.His9Arg	1|1	29	1	1|1	29	1	1|1	18	1	1|1	26	1
10	3125031	G	A	missense_variant	9230019H11Rik	ENSMUSG00000071434	transcript	ENSMUST00000095874	protein_coding	c.121G>A	p.Val41Ile	1|1	26	1	1|1	25	1	1|1	25	1	1|1	26	1
10	3125055	G	C	missense_variant	9230019H11Rik	ENSMUSG00000071434	transcript	ENSMUST00000095874	protein_coding	c.145G>C	p.Val49Leu	1|1	29	1	1|1	26	1	1|1	29	1	1|1	33	1
10	3125193	C	T	missense_variant	9230019H11Rik	ENSMUSG00000071434	transcript	ENSMUST00000095874	protein_coding	c.283C>T	p.Leu95Phe	1|1	25	1	1|1	35	1	1|1	21	1	1|1	28	1
10	3259307	T	C	stop_lost	H60c	ENSMUSG00000091618	transcript	ENSMUST00000170893	protein_coding	c.593A>G	p.Ter198Trpext*?	1|1	39	1	1|1	28	1	1|1	19	1	1|1	24	1
10	3259314	T	C	missense_variant	H60c	ENSMUSG00000091618	transcript	ENSMUST00000170893	protein_coding	c.586A>G	p.Ile196Val	1|1	40	1	1|1	28	1	1|1	18	1	1|1	24	1
10	3259361	C	T	missense_variant	H60c	ENSMUSG00000091618	transcript	ENSMUST00000170893	protein_coding	c.539G>A	p.Cys180Tyr	1|1	31	1	1|1	34	1	1|1	21	1	1|1	20	1
10	3259766	T	C	missense_variant	H60c	ENSMUSG00000091618	transcript	ENSMUST00000170893	protein_coding	c.433A>G	p.Met145Val	1|1	22	1	1|1	33	1	1|1	18	1	1|1	28	1
10	3260343	A	C	missense_variant	H60c	ENSMUSG00000091618	transcript	ENSMUST00000170893	protein_coding	c.118T>G	p.Phe40Val	1|1	43	1	1|1	27	1	1|1	31	1	1|1	36	1
10	3366700	GGT	G	frameshift_variant	Ppp1r14c	ENSMUSG00000040653	transcript	ENSMUST00000043374	protein_coding	c.36_37delTG	p.Gly13fs	0|1	28	0.5	0|1	27	0.48	0|1	25	0.36	0|1	24	0.33
10	3366704	G	C	missense_variant	Ppp1r14c	ENSMUSG00000040653	transcript	ENSMUST00000043374	protein_coding	c.38G>C	p.Gly13Ala	0|1	30	0.53	0|1	27	0.48	0|1	26	0.35	0|1	25	0.36
10	3366707	G	GTGT	disruptive_inframe_insertion	Ppp1r14c	ENSMUSG00000040653	transcript	ENSMUST00000043374	protein_coding	c.41_42insTGT	p.Gly14_Gly15insVal	0|1	30	0.53	0|1	28	0.5	0|1	25	0.36	0|1	24	0.38
10	3366712	G	T	missense_variant	Ppp1r14c	ENSMUSG00000040653	transcript	ENSMUST00000043374	protein_coding	c.46G>T	p.Gly16Cys	0|1	27	0.52	0|1	26	0.5	0|1	23	0.35	0|1	25	0.4
10	3366740	G	T	missense_variant	Ppp1r14c	ENSMUSG00000040653	transcript	ENSMUST00000043374	protein_coding	c.74G>T	p.Ser25Ile	0|1	26	0.46	0|1	23	0.48	0|1	22	0.18	0|1	26	0.35
10	3366821	C	T	missense_variant	Ppp1r14c	ENSMUSG00000040653	transcript	ENSMUST00000043374	protein_coding	c.155C>T	p.Thr52Met	0|1	16	0.31	0|1	19	0.26	0|1	22	0.18	0|1	28	0.14
10	3978708	T	C	missense_variant	Mthfd1l	ENSMUSG00000040675	transcript	ENSMUST00000043735	protein_coding	c.299T>C	p.Val100Ala	1|1	27	1	1|1	40	1	1|1	31	1	1|1	46	1
10	4007800	T	C	missense_variant	Mthfd1l	ENSMUSG00000040675	transcript	ENSMUST00000043735	protein_coding	c.836T>C	p.Val279Ala	1|1	22	1	1|1	23	1	1|1	29	1	1|1	26	1
10	4032345	T	C	splice_region_variant&intron_variant	Mthfd1l	ENSMUSG00000040675	transcript	ENSMUST00000043735	protein_coding	c.1545+6T>C		1|1	21	1	1|1	22	1	1|1	25	1	1|1	25	1
10	4369441	T	G	missense_variant	Zbtb2	ENSMUSG00000075327	transcript	ENSMUST00000100077	protein_coding	c.584A>C	p.Glu195Ala	1|1	23	1	1|1	34	1	1|1	18	1	1|1	25	1
10	4427290	A	T	missense_variant	Rmnd1	ENSMUSG00000019763	transcript	ENSMUST00000042251	protein_coding	c.388T>A	p.Ser130Thr	1|1	22	1	1|1	28	1	1|1	28	1	1|1	25	1
10	4427392	A	G	missense_variant	Rmnd1	ENSMUSG00000019763	transcript	ENSMUST00000042251	protein_coding	c.286T>C	p.Trp96Arg	1|1	17	1	1|1	18	1	1|1	28	1	1|1	25	1
10	4427504	T	C	missense_variant	Rmnd1	ENSMUSG00000019763	transcript	ENSMUST00000042251	protein_coding	c.174A>G	p.Ile58Met	1|1	4	1	1|1	8	1	1|1	18	1	1|1	14	1
10	4428467	T	A	splice_acceptor_variant&intron_variant	Rmnd1	ENSMUSG00000019763	transcript	ENSMUST00000126102	protein_coding	c.-71-2A>T		1|1	26	1	1|1	30	1	1|1	25	1	1|1	50	1
10	4450732	T	A	missense_variant	1700052N19Rik	ENSMUSG00000061759	transcript	ENSMUST00000095893	protein_coding	c.478T>A	p.Ser160Thr	1|1	26	1	1|1	19	1	1|1	20	1	1|1	38	1
10	4509916	C	A	missense_variant	Ccdc170	ENSMUSG00000019767	transcript	ENSMUST00000019901	protein_coding	c.45C>A	p.Ser15Arg	1|1	30	1	1|1	14	1	1|1	30	1	1|1	35	1
10	4512788	T	C	missense_variant	Ccdc170	ENSMUSG00000019767	transcript	ENSMUST00000138112	protein_coding	c.103T>C	p.Trp35Arg	1|1	27	1	1|1	30	1	1|1	24	1	1|1	36	1
10	4514114	T	C	missense_variant	Ccdc170	ENSMUSG00000019767	transcript	ENSMUST00000138112	protein_coding	c.254T>C	p.Val85Ala	1|1	28	1	1|1	16	1	1|1	20	1	1|1	40	1
10	4514155	G	T	missense_variant	Ccdc170	ENSMUSG00000019767	transcript	ENSMUST00000138112	protein_coding	c.295G>T	p.Ala99Ser	1|1	29	1	1|1	19	1	1|1	27	1	1|1	40	1
10	4966154	G	T	missense_variant	Esr1	ENSMUSG00000019768	transcript	ENSMUST00000105588	protein_coding	c.1340G>T	p.Gly447Val	1|1	30	1	1|1	12	1	1|1	22	1	1|1	35	1
10	5813408	T	TGG	splice_region_variant&intron_variant	Mtrf1l	ENSMUSG00000019774	transcript	ENSMUST00000019908	protein_coding	c.922-4_922-3dupCC		1|1	24	1	1|1	23	1	1|1	25	1	1|1	40	1
10	5814180	A	G	splice_region_variant&intron_variant	Mtrf1l	ENSMUSG00000019774	transcript	ENSMUST00000019908	protein_coding	c.785-3T>C		1|1	28	1	1|1	11	1	1|1	43	1	1|1	33	1
10	6837992	TTGTGTGTGTGTGTGTGTGTG	T	splice_region_variant&intron_variant	Oprm1	ENSMUSG00000000766	transcript	ENSMUST00000092729	nonsense_mediated_decay	n.1159-23_1159-4delGTGTGTGTGTGTGTGTGTGT		1|1	13	1	1|1	15	1	1|1	12	1	1|1	19	1
10	6890551	G	A	missense_variant	Ipcef1	ENSMUSG00000064065	transcript	ENSMUST00000078070	protein_coding	c.1157C>T	p.Ala386Val	1|1	23	1	1|1	29	1	1|1	27	1	1|1	35	1
10	6908066	T	G	splice_region_variant&intron_variant	Oprm1	ENSMUSG00000000766	transcript	ENSMUST00000129954	nonsense_mediated_decay	n.1345+5T>G		1|1	18	1	1|1	29	1	1|1	26	1	1|1	28	1
10	6919968	C	T	missense_variant	Ipcef1	ENSMUSG00000064065	transcript	ENSMUST00000078070	protein_coding	c.584G>A	p.Arg195Gln	1|1	29	1	1|1	22	1	1|1	24	1	1|1	28	1
10	7445564	T	C	missense_variant	Ulbp1	ENSMUSG00000079685	transcript	ENSMUST00000177585	protein_coding	c.992A>G	p.Asp331Gly	0|1	51	0.43	0|1	44	0.41	0|1	46	0.41	0|1	43	0.33
10	7445571	C	G	missense_variant	Ulbp1	ENSMUSG00000079685	transcript	ENSMUST00000177585	protein_coding	c.985G>C	p.Asp329His	0|1	53	0.42	0|1	44	0.43	0|1	48	0.44	0|1	44	0.34
10	7445609	G	A	missense_variant	Ulbp1	ENSMUSG00000079685	transcript	ENSMUST00000177585	protein_coding	c.947C>T	p.Pro316Leu	0|1	52	0.35	0|1	38	0.34	0|1	42	0.5	0|1	46	0.37
10	7445613	A	G	missense_variant	Ulbp1	ENSMUSG00000079685	transcript	ENSMUST00000177585	protein_coding	c.943T>C	p.Phe315Leu	0|1	49	0.33	0|1	39	0.33	0|1	42	0.48	0|1	45	0.38
10	7445681	G	A	missense_variant	Ulbp1	ENSMUSG00000079685	transcript	ENSMUST00000177585	protein_coding	c.875C>T	p.Ser292Leu	0/1	44	0.27	0/1	35	0.37	0/1	46	0.39	0/1	51	0.29
10	7473311	A	G	missense_variant	Ulbp1	ENSMUSG00000079685	transcript	ENSMUST00000177585	protein_coding	c.31T>C	p.Ser11Pro	0|1	43	0.23	0|1	32	0.16	0|1	39	0.26	0|1	44	0.07
10	7473323	T	C	missense_variant	Ulbp1	ENSMUSG00000079685	transcript	ENSMUST00000177585	protein_coding	c.19A>G	p.Asn7Asp	0|1	42	0.26	0|1	30	0.23	0|1	43	0.28	0|1	51	0.14
10	7473329	C	T	missense_variant	Ulbp1	ENSMUSG00000079685	transcript	ENSMUST00000177585	protein_coding	c.13G>A	p.Ala5Thr	0|1	42	0.29	0|1	30	0.23	0|1	44	0.27	0|1	49	0.14
10	7473375	C	G	5_prime_UTR_premature_start_codon_gain_variant	Ulbp1	ENSMUSG00000079685	transcript	ENSMUST00000177585	protein_coding	c.-34G>C		0|1	39	0.33	0|1	32	0.25	0|1	48	0.38	0|1	49	0.16
10	7638968	T	C	missense_variant	Pcmt1	ENSMUSG00000019795	transcript	ENSMUST00000161428	protein_coding	c.475A>G	p.Ile159Val	1|1	17	1	1|1	17	1	1|1	24	1	1|1	31	1
10	7713262	CTTAAAAAATAGTGCTCTGT	C	splice_donor_variant&splice_region_variant&3_prime_UTR_variant&intron_variant	Lats1	ENSMUSG00000040021	transcript	ENSMUST00000040043	protein_coding	c.*260_*270+8delATAGTGCTCTGTTTAAAAA		1|1	24	1	1|1	20	1	1|1	33	1	1|1	18	1
10	7741513	T	C	missense_variant	Katna1	ENSMUSG00000019794	transcript	ENSMUST00000165806	protein_coding	c.274T>C	p.Phe92Leu	1|1	22	1	1|1	30	1	1|1	24	1	1|1	25	1
10	7762799	G	C	missense_variant	Katna1	ENSMUSG00000019794	transcript	ENSMUST00000174007	protein_coding	c.197G>C	p.Arg66Pro	1|1	19	1	1|1	36	1	1|1	33	1	1|1	52	1
10	7821178	C	A	missense_variant	Ppil4	ENSMUSG00000015757	transcript	ENSMUST00000015901	protein_coding	c.1454C>A	p.Ala485Asp	1|1	24	1	1|1	24	1	1|1	17	1	1|1	43	1
10	8725513	C	T	missense_variant	Sash1	ENSMUSG00000015305	transcript	ENSMUST00000015449	protein_coding	c.3677G>A	p.Ser1226Asn	1|1	28	1	1|1	33	1	1|1	13	1	1|1	38	1
10	8744586	G	A	missense_variant	Sash1	ENSMUSG00000015305	transcript	ENSMUST00000015449	protein_coding	c.1309C>T	p.Pro437Ser	1|1	28	1	1|1	32	1	1|1	24	1	1|1	27	1
10	8756764	G	A	splice_region_variant&intron_variant	Sash1	ENSMUSG00000015305	transcript	ENSMUST00000015449	protein_coding	c.709-3C>T		1|1	25	1	1|1	28	1	1|1	26	1	1|1	32	1
10	8780512	G	A	splice_region_variant&intron_variant	Sash1	ENSMUSG00000015305	transcript	ENSMUST00000015449	protein_coding	c.708+7C>T		1|1	31	1	1|1	25	1	1|1	25	1	1|1	28	1
10	8789557	C	T	splice_region_variant&intron_variant	Sash1	ENSMUSG00000015305	transcript	ENSMUST00000015449	protein_coding	c.406+4G>A		1|1	20	1	1|1	30	1	1|1	21	1	1|1	40	1
10	8789558	T	G	splice_region_variant&intron_variant	Sash1	ENSMUSG00000015305	transcript	ENSMUST00000015449	protein_coding	c.406+3A>C		1|1	20	1	1|1	30	1	1|1	21	1	1|1	40	1
10	9534619	A	G	missense_variant	Gm9930	ENSMUSG00000053980	transcript	ENSMUST00000066742	protein_coding	c.361T>C	p.Tyr121His	1|1	17	1	1|1	30	1	1|1	31	1	1|1	32	1
10	9534820	A	C	missense_variant	Gm9930	ENSMUSG00000053980	transcript	ENSMUST00000066742	protein_coding	c.160T>G	p.Ser54Ala	1|1	16	1	1|1	19	1	1|1	25	1	1|1	31	1
10	9534865	G	A	missense_variant	Gm9930	ENSMUSG00000053980	transcript	ENSMUST00000066742	protein_coding	c.115C>T	p.Arg39Trp	1|1	16	1	1|1	23	1	1|1	22	1	1|1	38	1
10	9534950	T	A	missense_variant	Gm9930	ENSMUSG00000053980	transcript	ENSMUST00000066742	protein_coding	c.30A>T	p.Leu10Phe	1|1	19	1	1|1	22	1	1|1	23	1	1|1	34	1
10	9535266	G	A	5_prime_UTR_premature_start_codon_gain_variant	Gm9930	ENSMUSG00000053980	transcript	ENSMUST00000066742	protein_coding	c.-287C>T		1|1	21	1	1|1	17	1	1|1	21	1	1|1	23	1
10	9674657	C	T	missense_variant	Samd5	ENSMUSG00000060487	transcript	ENSMUST00000100070	protein_coding	c.307G>A	p.Ala103Thr	1|1	15	1	1|1	24	1	1|1	20	1	1|1	15	1
10	9770451	G	A	splice_region_variant&synonymous_variant	Stxbp5	ENSMUSG00000019790	transcript	ENSMUST00000038213	protein_coding	c.2547C>T	p.Ser849Ser	1|1	30	1	1|1	25	0.96	1|1	32	1	1|1	23	1
10	9812034	T	TA	splice_region_variant&intron_variant	Stxbp5	ENSMUSG00000019790	transcript	ENSMUST00000038213	protein_coding	c.1297-3dupT		0/1	4	0.75	0/1	13	0.55	0/1	12	0.75	0/1	17	0.57
10	9841940	A	G	splice_region_variant&intron_variant	Stxbp5	ENSMUSG00000019790	transcript	ENSMUST00000038213	protein_coding	c.570-6T>C		1|1	19	1	1|1	15	1	1|1	22	1	1|1	33	1
10	11188037	G	A	splice_donor_variant&intron_variant	Shprh	ENSMUSG00000090112	transcript	ENSMUST00000159553	retained_intron	n.1670+1G>A		1|1	29	1	1|1	13	1	1|1	19	1	1|1	34	1
10	11457390	G	T	missense_variant	Epm2a	ENSMUSG00000055493	transcript	ENSMUST00000069106	protein_coding	c.966G>T	p.Lys322Asn	1|1	30	1	1|1	30	1	1|1	23	1	1|1	31	1
10	12633939	C	CTTTCCTG	splice_region_variant&intron_variant	Utrn	ENSMUSG00000019820	transcript	ENSMUST00000076817	protein_coding	c.7283+4_7283+5insCAGGAAA		1|1	34	1	1|1	23	1	1|1	26	1	1|1	32	1
10	12652736	C	T	missense_variant	Utrn	ENSMUSG00000019820	transcript	ENSMUST00000076817	protein_coding	c.6494G>A	p.Arg2165Lys	1|1	22	1	1|1	17	1	1|1	28	1	1|1	38	1
10	12652867	C	CA	splice_region_variant&intron_variant	Utrn	ENSMUSG00000019820	transcript	ENSMUST00000076817	protein_coding	c.6370-8dupT		1|1	22	1	1|1	23	1	1|1	28	1	1|1	27	1
10	12678752	TA	T	splice_region_variant&intron_variant	Utrn	ENSMUSG00000019820	transcript	ENSMUST00000076817	protein_coding	c.4594-3delT		1|1	40	1	1|1	17	1	1|1	22	1	1|1	31	1
10	12680463	GC	G	splice_region_variant&intron_variant	Utrn	ENSMUSG00000019820	transcript	ENSMUST00000076817	protein_coding	c.4593+8delG		1|1	17	1	1|1	16	1	1|1	14	1	1|1	29	1
10	12690895	C	A	missense_variant	Utrn	ENSMUSG00000019820	transcript	ENSMUST00000076817	protein_coding	c.3522G>T	p.Glu1174Asp	1|1	26	1	1|1	18	1	1|1	29	1	1|1	37	1
10	12693509	G	A	missense_variant	Utrn	ENSMUSG00000019820	transcript	ENSMUST00000076817	protein_coding	c.3362C>T	p.Ser1121Leu	1|1	27	1	1|1	17	1	1|1	32	1	1|1	25	1
10	12941909	T	C	missense_variant	Stx11	ENSMUSG00000039232	transcript	ENSMUST00000042861	protein_coding	c.70A>G	p.Asn24Asp	1|1	31	1	1|1	21	1	1|1	20	1	1|1	32	1
10	12944145	G	GC	splice_region_variant&intron_variant	Stx11	ENSMUSG00000039232	transcript	ENSMUST00000042861	protein_coding	c.-6+6_-6+7insG		1|1	26	1	1|1	26	1	1|1	40	1	1|1	42	1
10	12944291	CA	C	splice_region_variant&intron_variant	Stx11	ENSMUSG00000039232	transcript	ENSMUST00000042861	protein_coding	c.-140-6delT		1|1	17	1	1|1	18	1	1|1	39	1	1|1	40	1
10	13829623	C	G	splice_region_variant&intron_variant	Aig1	ENSMUSG00000019806	transcript	ENSMUST00000162798	retained_intron	n.410+5G>C		1|1	41	1	1|1	31	1	1|1	16	1	1|1	35	1
10	13967092	A	G	splice_region_variant&intron_variant	Gm26835	ENSMUSG00000097300	transcript	ENSMUST00000181888	lincRNA	n.3209-3T>C		1|1	18	1	1|1	16	1	1|1	13	1	1|1	19	1
10	14143850	A	C	missense_variant	Hivep2	ENSMUSG00000015501	transcript	ENSMUST00000015645	protein_coding	c.6364A>C	p.Met2122Leu	1|1	17	1	1|1	18	1	1|1	26	1	1|1	49	0.98
10	14427012	T	C	splice_region_variant&intron_variant	Gpr126	ENSMUSG00000039116	transcript	ENSMUST00000041168	protein_coding	c.2580-8A>G		1|1	25	1	1|1	14	1	1|1	22	1	1|1	32	1
10	14458125	C	A	missense_variant	Gpr126	ENSMUSG00000039116	transcript	ENSMUST00000041168	protein_coding	c.1093G>T	p.Ala365Ser	1|1	19	1	1|1	18	1	1|1	32	1	1|1	26	1
10	14467304	C	T	missense_variant	Gpr126	ENSMUSG00000039116	transcript	ENSMUST00000041168	protein_coding	c.898G>A	p.Val300Ile	1|1	19	1	1|1	14	1	1|1	32	1	1|1	39	1
10	14467412	T	C	missense_variant	Gpr126	ENSMUSG00000039116	transcript	ENSMUST00000041168	protein_coding	c.790A>G	p.Ile264Val	1|1	26	1	1|1	25	1	1|1	32	1	1|1	39	1
10	14760711	G	GTAAA	frameshift_variant	B230364G03Rik	ENSMUSG00000096963	transcript	ENSMUST00000181479	protein_coding	c.6_9dupTTTA	p.Pro4fs	1|1	15	1	1|1	5	1	1|1	13	1	1|1	17	0.94
10	17806754	A	AT	splice_acceptor_variant&intron_variant	Txlnb	ENSMUSG00000039891	transcript	ENSMUST00000037964	protein_coding	c.434-3dupT		1|1	25	1	1|1	24	1	1|1	18	1	1|1	35	1
10	17908030	C	T	splice_region_variant&intron_variant	Heca	ENSMUSG00000039879	transcript	ENSMUST00000037879	protein_coding	c.1470+4G>A		1|1	23	1	1|1	23	1	1|1	30	1	1|1	35	1
10	18018841	C	T	missense_variant&splice_region_variant	Abracl	ENSMUSG00000078453	transcript	ENSMUST00000020002	protein_coding	c.59G>A	p.Arg20Lys	1|1	25	1	1|1	30	1	1|1	21	1	1|1	38	1
10	18144599	C	T	missense_variant	Ect2l	ENSMUSG00000071392	transcript	ENSMUST00000095817	protein_coding	c.1646G>A	p.Ser549Asn	1|1	21	1	1|1	25	1	1|1	19	1	1|1	42	1
10	18159754	C	T	missense_variant	Ect2l	ENSMUSG00000071392	transcript	ENSMUST00000095817	protein_coding	c.1598G>A	p.Gly533Glu	1|1	18	0.94	1|1	33	1	1|1	22	1	1|1	31	0.94
10	18175367	CA	C	splice_region_variant&intron_variant	Ect2l	ENSMUSG00000071392	transcript	ENSMUST00000095817	protein_coding	c.216-5delT		1|1	24	1	1|1	22	1	1|1	13	1	1|1	27	1
10	18201323	C	T	missense_variant	Ect2l	ENSMUSG00000071392	transcript	ENSMUST00000095817	protein_coding	c.31G>A	p.Val11Met	1|1	31	1	1|1	24	1	1|1	20	1	1|1	51	1
10	18210853	T	C	5_prime_UTR_premature_start_codon_gain_variant	Ect2l	ENSMUSG00000071392	transcript	ENSMUST00000095817	protein_coding	c.-127A>G		1|1	13	1	1|1	20	1	1|1	17	1	1|1	15	1
10	18213678	A	G	splice_region_variant	Ccdc28a	ENSMUSG00000059554	transcript	ENSMUST00000080860	protein_coding	c.*446T>C		1|1	23	1	1|1	15	1	1|1	20	1	1|1	34	1
10	18225068	G	A	splice_region_variant&intron_variant	Ccdc28a	ENSMUSG00000059554	transcript	ENSMUST00000052648	protein_coding	c.159-8C>T		1|1	16	1	1|1	15	1	1|1	22	1	1|1	28	1
10	18390351	A	G	5_prime_UTR_premature_start_codon_gain_variant	Nhsl1	ENSMUSG00000039835	transcript	ENSMUST00000159299	nonsense_mediated_decay	n.-334A>G		1|1	9	1	1|1	20	1	1|1	17	1	1|1	26	1
10	18390462	C	T	5_prime_UTR_premature_start_codon_gain_variant	Nhsl1	ENSMUSG00000039835	transcript	ENSMUST00000159299	nonsense_mediated_decay	n.-223C>T		1|1	19	1	1|1	22	1	1|1	26	1	1|1	31	1
10	18498051	A	G	missense_variant	Nhsl1	ENSMUSG00000039835	transcript	ENSMUST00000037341	protein_coding	c.374A>G	p.Gln125Arg	1|1	34	1	1|1	23	1	1|1	20	1	1|1	28	1
10	18524079	G	A	missense_variant	Nhsl1	ENSMUSG00000039835	transcript	ENSMUST00000037341	protein_coding	c.962G>A	p.Ser321Asn	1|1	24	1	1|1	26	1	1|1	22	1	1|1	38	1
10	18524868	G	C	missense_variant	Nhsl1	ENSMUSG00000039835	transcript	ENSMUST00000037341	protein_coding	c.1751G>C	p.Cys584Ser	1|1	29	1	1|1	28	1	1|1	19	1	1|1	26	1
10	18531872	A	G	missense_variant	Nhsl1	ENSMUSG00000039835	transcript	ENSMUST00000037341	protein_coding	c.4663A>G	p.Ser1555Gly	1|1	9	1	1|1	30	1	1|1	16	1	1|1	37	1
10	18541336	C	T	splice_region_variant&intron_variant	Hebp2	ENSMUSG00000019853	transcript	ENSMUST00000020000	protein_coding	c.420-4G>A		1|1	28	1	1|1	31	1	1|1	28	1	1|1	45	1
10	18546055	T	C	5_prime_UTR_premature_start_codon_gain_variant	Hebp2	ENSMUSG00000019853	transcript	ENSMUST00000020000	protein_coding	c.-260A>G		1|1	17	1	1|1	24	1	1|1	22	1	1|1	24	1
10	19002963	A	G	missense_variant	Tnfaip3	ENSMUSG00000019850	transcript	ENSMUST00000019997	protein_coding	c.2096T>C	p.Leu699Pro	1|1	25	1	1|1	22	1	1|1	23	1	1|1	32	1
10	19003739	T	G	missense_variant	Tnfaip3	ENSMUSG00000019850	transcript	ENSMUST00000019997	protein_coding	c.1880A>C	p.Glu627Ala	1|1	28	1	1|1	21	1	1|1	40	1	1|1	39	1
10	19601376	A	G	missense_variant	Ifngr1	ENSMUSG00000020009	transcript	ENSMUST00000020188	protein_coding	c.284A>G	p.Glu95Gly	1|1	11	1	1|1	30	1	1|1	21	1	1|1	18	1
10	19632909	C	G	missense_variant	Il22ra2	ENSMUSG00000039760	transcript	ENSMUST00000036564	protein_coding	c.684C>G	p.His228Gln	1|1	20	1	1|1	21	1	1|1	32	1	1|1	26	1
10	19659406	C	A	5_prime_UTR_premature_start_codon_gain_variant	9230106D20Rik	ENSMUSG00000042940	transcript	ENSMUST00000052806	protein_coding	c.-250C>A		1|1	37	1	1|1	24	1	1|1	26	1	1|1	38	1
10	19750662	G	A	missense_variant	Il20ra	ENSMUSG00000020007	transcript	ENSMUST00000020185	protein_coding	c.433G>A	p.Val145Ile	1|1	19	1	1|1	24	1	1|1	18	1	1|1	30	1
10	20082380	A	G	splice_region_variant&intron_variant	Map3k5	ENSMUSG00000071369	transcript	ENSMUST00000095806	protein_coding	c.1956-7A>G		1|1	24	1	1|1	29	1	1|1	21	1	1|1	31	1
10	20148615	T	A	5_prime_UTR_premature_start_codon_gain_variant	Map7	ENSMUSG00000019996	transcript	ENSMUST00000020173	protein_coding	c.-399T>A		1|1	13	1	1|1	14	1	1|1	22	1	1|1	12	1
10	20246593	G	A	splice_region_variant&intron_variant	Map7	ENSMUSG00000019996	transcript	ENSMUST00000116259	protein_coding	c.409-5G>A		1|1	21	1	1|1	18	1	1|1	25	1	1|1	31	1
10	20357285	C	T	missense_variant	Mtfr2	ENSMUSG00000019992	transcript	ENSMUST00000169712	protein_coding	c.599C>T	p.Pro200Leu	1|1	17	1	1|1	20	1	1|1	26	1	1|1	33	1
10	20357346	TCCTCCTCCTCCTCCCCCA	T	disruptive_inframe_deletion	Mtfr2	ENSMUSG00000019992	transcript	ENSMUST00000169712	protein_coding	c.674_691delCCCCACCTCCTCCTCCTC	p.Pro225_Pro230del	1|1	20	1	1|1	14	1	1|1	27	1	1|1	28	1
10	20979614	A	T	splice_region_variant&intron_variant	Ahi1	ENSMUSG00000019986	transcript	ENSMUST00000105525	protein_coding	c.1816+5A>T		1|1	16	1	1|1	16	1	1|1	23	1	1|1	18	1
10	21141835	T	C	missense_variant	Myb	ENSMUSG00000019982	transcript	ENSMUST00000020158	protein_coding	c.1499A>G	p.Gln500Arg	1|1	22	1	1|1	14	1	1|1	19	1	1|1	31	1
10	21310057	AACT	A	disruptive_inframe_deletion	Hbs1l	ENSMUSG00000019977	transcript	ENSMUST00000092674	protein_coding	c.1379_1381delCTA	p.Thr460del	1|1	17	1	1|1	15	1	1|1	21	1	1|1	19	1
10	21388938	A	G	missense_variant&splice_region_variant	Aldh8a1	ENSMUSG00000037542	transcript	ENSMUST00000159163	protein_coding	c.587A>G	p.Asp196Gly	1|1	19	1	1|1	25	1	1|1	29	1	1|1	32	1
10	21992365	T	C	5_prime_UTR_premature_start_codon_gain_variant	Sgk1	ENSMUSG00000019970	transcript	ENSMUST00000150089	protein_coding	c.-9T>C		1|1	31	1	1|1	31	1	1|1	29	1	1|1	27	1
10	22047233	A	G	splice_region_variant&non_coding_transcript_exon_variant	Gm8540	ENSMUSG00000090535	transcript	ENSMUST00000168952	unprocessed_pseudogene	n.259T>C		1|1	12	1	1|1	11	1	1|1	15	1	1|1	20	1
10	22047360	G	A	splice_region_variant&intron_variant	Gm8540	ENSMUSG00000090535	transcript	ENSMUST00000168952	unprocessed_pseudogene	n.137-5C>T		1|1	21	1	1|1	18	1	1|1	19	1	1|1	28	1
10	22048371	T	C	splice_region_variant&intron_variant	Gm8540	ENSMUSG00000090535	transcript	ENSMUST00000168952	unprocessed_pseudogene	n.136+6A>G		1|1	6	1	1|1	8	1	1|1	9	1	1|1	13	1
10	22048372	G	T	splice_region_variant&intron_variant	Gm8540	ENSMUSG00000090535	transcript	ENSMUST00000168952	unprocessed_pseudogene	n.136+5C>A		1|1	6	1	1|1	8	1	1|1	9	1	1|1	13	1
10	22048373	T	C	splice_region_variant&intron_variant	Gm8540	ENSMUSG00000090535	transcript	ENSMUST00000168952	unprocessed_pseudogene	n.136+4A>G		1|1	6	1	1|1	8	1	1|1	9	1	1|1	13	1
10	22067316	TCTGCCGCAAGGA	T	disruptive_inframe_deletion	4930444G20Rik	ENSMUSG00000069712	transcript	ENSMUST00000092672	protein_coding	c.752_763delTCCTTGCGGCAG	p.Val251_Ala254del	1|1	17	1	1|1	11	1	1|1	10	1	1|1	26	1
10	22067347	A	G	missense_variant	4930444G20Rik	ENSMUSG00000069712	transcript	ENSMUST00000092672	protein_coding	c.733T>C	p.Phe245Leu	1|1	19	1	1|1	15	1	1|1	13	1	1|1	25	1
10	22067361	T	C	missense_variant	4930444G20Rik	ENSMUSG00000069712	transcript	ENSMUST00000092672	protein_coding	c.719A>G	p.Lys240Arg	1|1	20	1	1|1	15	1	1|1	13	1	1|1	28	1
10	22067385	G	GA	frameshift_variant	4930444G20Rik	ENSMUSG00000069712	transcript	ENSMUST00000092672	protein_coding	c.694_695insT	p.Ala232fs	1|1	24	1	1|1	19	1	1|1	14	1	1|1	23	1
10	22067388	TG	T	frameshift_variant	4930444G20Rik	ENSMUSG00000069712	transcript	ENSMUST00000092672	protein_coding	c.691delC	p.Gln231fs	1|1	24	1	1|1	19	1	1|1	13	1	1|1	24	1
10	22067568	C	T	missense_variant	4930444G20Rik	ENSMUSG00000069712	transcript	ENSMUST00000092672	protein_coding	c.512G>A	p.Gly171Glu	1|1	30	1	1|1	21	1	1|1	14	1	1|1	20	1
10	22067620	A	T	missense_variant	4930444G20Rik	ENSMUSG00000069712	transcript	ENSMUST00000092672	protein_coding	c.460T>A	p.Phe154Ile	1|1	20	1	1|1	9	1	1|1	11	1	1|1	11	1
10	22067624	G	C	missense_variant	4930444G20Rik	ENSMUSG00000069712	transcript	ENSMUST00000092672	protein_coding	c.456C>G	p.His152Gln	1|1	19	1	1|1	9	1	1|1	11	1	1|1	11	1
10	22067645	A	C	missense_variant	4930444G20Rik	ENSMUSG00000069712	transcript	ENSMUST00000092672	protein_coding	c.435T>G	p.Ser145Arg	1|1	14	1	1|1	7	1	1|1	9	1	1|1	7	1
10	22112870	A	G	splice_region_variant&intron_variant	Gm19791	ENSMUSG00000097214	transcript	ENSMUST00000180398	unprocessed_pseudogene	n.390-6A>G		1|1	5	1	1|1	10	1	1|1	12	1	1|1	14	1
10	22144486	C	T	missense_variant	E030030I06Rik	ENSMUSG00000055657	transcript	ENSMUST00000069372	protein_coding	c.553G>A	p.Val185Ile	1|1	28	1	1|1	32	1	1|1	22	1	1|1	27	1
10	22148507	T	C	missense_variant	E030030I06Rik	ENSMUSG00000055657	transcript	ENSMUST00000179054	protein_coding	c.506A>G	p.Glu169Gly	0|1	29	0.86	0|1	42	0.88	0|1	18	0.83	0|1	25	0.84
10	22148509	T	A	missense_variant	E030030I06Rik	ENSMUSG00000055657	transcript	ENSMUST00000179054	protein_coding	c.504A>T	p.Leu168Phe	0|1	29	0.86	0|1	42	0.88	0|1	18	0.83	0|1	25	0.84
10	22148589	G	C	missense_variant	E030030I06Rik	ENSMUSG00000055657	transcript	ENSMUST00000179054	protein_coding	c.424C>G	p.Gln142Glu	1|1	16	1	1|1	26	1	1|1	5	1	1|1	8	1
10	22148597	G	A	missense_variant	E030030I06Rik	ENSMUSG00000055657	transcript	ENSMUST00000179054	protein_coding	c.416C>T	p.Pro139Leu	1|1	15	1	1|1	25	1	1|1	2	1	1|1	8	1
10	22148841	T	C	missense_variant	E030030I06Rik	ENSMUSG00000055657	transcript	ENSMUST00000179054	protein_coding	c.172A>G	p.Ser58Gly	0|1	9	0.78	0|1	23	0.57	0|1	14	0.5	0|1	20	0.8
10	22148862	C	T	missense_variant	E030030I06Rik	ENSMUSG00000055657	transcript	ENSMUST00000179054	protein_coding	c.151G>A	p.Gly51Ser	0|1	14	0.79	0|1	26	0.5	0|1	17	0.41	0|1	25	0.68
10	22148865	C	A	missense_variant	E030030I06Rik	ENSMUSG00000055657	transcript	ENSMUST00000179054	protein_coding	c.148G>T	p.Gly50Cys	0|1	14	0.5	0|1	28	0.18	0|1	20	0.15	0|1	25	0.28
10	22148867	CCG	C	frameshift_variant	E030030I06Rik	ENSMUSG00000055657	transcript	ENSMUST00000179054	protein_coding	c.144_145delCG	p.Gly49fs	0|1	14	0.29	0|1	30	0.33	0|1	20	0.25	0|1	27	0.33
10	22148871	A	AGAGAGCGCC	conservative_inframe_insertion	E030030I06Rik	ENSMUSG00000055657	transcript	ENSMUST00000179054	protein_coding	c.141_142insGGCGCTCTC	p.Ile47_Ser48insGlyAlaLeu	0|1	16	0.31	0|1	33	0.36	0|1	20	0.25	0|1	29	0.31
10	22148872	G	GAGCGCCA	frameshift_variant	E030030I06Rik	ENSMUSG00000055657	transcript	ENSMUST00000179054	protein_coding	c.140_141insTGGCGCT	p.Ser48fs	0|1	16	0.5	0|1	33	0.18	0|1	21	0.14	0|1	32	0.31
10	22148897	C	T	missense_variant	E030030I06Rik	ENSMUSG00000055657	transcript	ENSMUST00000179054	protein_coding	c.116G>A	p.Arg39His	0|1	23	0.39	0|1	48	0.21	0|1	29	0.07	0|1	45	0.31
10	22148904	G	T	missense_variant	E030030I06Rik	ENSMUSG00000055657	transcript	ENSMUST00000179054	protein_coding	c.109C>A	p.Arg37Ser	0/1	24	0.71	0/1	51	0.59	0/1	33	0.48	0/1	49	0.61
10	22148959	AGT	A	frameshift_variant	E030030I06Rik	ENSMUSG00000055657	transcript	ENSMUST00000179054	protein_coding	c.52_53delAC	p.Thr18fs	0|1	60	0.72	0|1	85	0.68	0|1	44	0.57	0|1	72	0.57
10	22148972	T	A	missense_variant	E030030I06Rik	ENSMUSG00000055657	transcript	ENSMUST00000179054	protein_coding	c.41A>T	p.Gln14Leu	0|1	65	0.28	0|1	91	0.3	0|1	51	0.45	0|1	78	0.38
10	22148975	C	T	missense_variant	E030030I06Rik	ENSMUSG00000055657	transcript	ENSMUST00000179054	protein_coding	c.38G>A	p.Gly13Glu	1|1	66	1	1|1	91	1	1|1	52	1	1|1	82	1
10	22148987	C	T	stop_gained	E030030I06Rik	ENSMUSG00000055657	transcript	ENSMUST00000179054	protein_coding	c.26G>A	p.Trp9*	0|1	66	0.29	0|1	95	0.25	0|1	56	0.46	0|1	81	0.37
10	22149010	C	T	start_lost	E030030I06Rik	ENSMUSG00000055657	transcript	ENSMUST00000179054	protein_coding	c.3G>A	p.Met1?	0|1	71	0.3	0|1	96	0.25	0|1	62	0.42	0|1	90	0.34
10	22149011	A	C	start_lost	E030030I06Rik	ENSMUSG00000055657	transcript	ENSMUST00000179054	protein_coding	c.2T>G	p.Met1?	1|1	73	1	1|1	96	1	1|1	61	1	1|1	91	1
10	22149091	C	G	5_prime_UTR_premature_start_codon_gain_variant	E030030I06Rik	ENSMUSG00000055657	transcript	ENSMUST00000179054	protein_coding	c.-79G>C		1|1	78	1	1|1	87	1	1|1	62	1	1|1	81	1
10	22149101	T	A	5_prime_UTR_premature_start_codon_gain_variant	E030030I06Rik	ENSMUSG00000055657	transcript	ENSMUST00000179054	protein_coding	c.-89A>T		1|1	80	1	1|1	85	1	1|1	58	1	1|1	81	1
10	22149148	G	C	5_prime_UTR_premature_start_codon_gain_variant	E030030I06Rik	ENSMUSG00000055657	transcript	ENSMUST00000179054	protein_coding	c.-136C>G		0/1	72	0.25	0/1	70	0.13	0/1	49	0.2	0/1	73	0.21
10	22149182	G	C	5_prime_UTR_premature_start_codon_gain_variant	E030030I06Rik	ENSMUSG00000055657	transcript	ENSMUST00000179054	protein_coding	c.-170C>G		0/1	53	0.62	0/1	60	0.62	0/1	45	0.64	0/1	63	0.51
10	22149235	G	A	5_prime_UTR_premature_start_codon_gain_variant	E030030I06Rik	ENSMUSG00000055657	transcript	ENSMUST00000179054	protein_coding	c.-223C>T		0/1	59	0.58	0/1	43	0.47	0/1	41	0.59	0/1	50	0.64
10	22149241	C	T	5_prime_UTR_premature_start_codon_gain_variant	E030030I06Rik	ENSMUSG00000055657	transcript	ENSMUST00000179054	protein_coding	c.-229G>A		0/1	52	0.6	0/1	42	0.5	0/1	41	0.59	0/1	47	0.66
10	22149253	T	C	5_prime_UTR_premature_start_codon_gain_variant	E030030I06Rik	ENSMUSG00000055657	transcript	ENSMUST00000179054	protein_coding	c.-241A>G		0/1	48	0.56	0/1	44	0.5	0/1	36	0.53	0/1	39	0.62
10	22158580	C	T	5_prime_UTR_premature_start_codon_gain_variant	Raet1e	ENSMUSG00000053219	transcript	ENSMUST00000181645	protein_coding	c.-425C>T		0/1	52	0.5	0|1	51	0.63	0/1	26	0.5	0/1	54	0.48
10	22158585	T	C	5_prime_UTR_premature_start_codon_gain_variant	Raet1e	ENSMUSG00000053219	transcript	ENSMUST00000181645	protein_coding	c.-420T>C		1|1	50	1	1|1	53	1	1|1	26	1	1|1	54	1
10	22158662	G	T	5_prime_UTR_premature_start_codon_gain_variant	H60b	ENSMUSG00000075297	transcript	ENSMUST00000105522	protein_coding	c.-97G>T		0/1	37	0.14	0|1	43	0.16	0/1	31	0.16	0/1	48	0.21
10	22171997	G	A	splice_region_variant&intron_variant	Raet1e	ENSMUSG00000053219	transcript	ENSMUST00000181645	protein_coding	c.-286-7G>A		0/1	33	0.48	0/1	16	0.75	0/1	33	0.55	0/1	42	0.74
10	22173250	G	C	splice_region_variant	Raet1e	ENSMUSG00000053219	transcript	ENSMUST00000181645	protein_coding	c.-119G>C		0/1	30	0.8	0/1	29	0.62	0/1	28	0.75	0/1	39	0.59
10	22180654	A	C	missense_variant	Raet1e	ENSMUSG00000053219	transcript	ENSMUST00000065527	protein_coding	c.128A>C	p.Asp43Ala	0/1	21	0.24	0/1	15	0.33	0/1	10	0.1	0/1	16	0.25
10	22180662	T	C	missense_variant	Raet1e	ENSMUSG00000053219	transcript	ENSMUST00000065527	protein_coding	c.136T>C	p.Ser46Pro	1|1	19	1	1|1	13	1	1|1	9	1	1|1	15	1
10	22180672	T	C	missense_variant	Raet1e	ENSMUSG00000053219	transcript	ENSMUST00000065527	protein_coding	c.146T>C	p.Leu49Pro	1|1	17	1	1|1	12	1	1|1	9	1	1|1	12	1
10	22180675	C	T	missense_variant	Raet1e	ENSMUSG00000053219	transcript	ENSMUST00000065527	protein_coding	c.149C>T	p.Pro50Leu	1|1	15	1	1|1	12	1	1|1	8	1	1|1	11	1
10	22180681	G	A	missense_variant	Raet1e	ENSMUSG00000053219	transcript	ENSMUST00000065527	protein_coding	c.155G>A	p.Cys52Tyr	1|1	12	1	1|1	10	1	1|1	8	1	1|1	10	1
10	22180685	C	A	missense_variant	Raet1e	ENSMUSG00000053219	transcript	ENSMUST00000065527	protein_coding	c.159C>A	p.Asp53Glu	1|1	11	1	1|1	9	1	1|1	7	1	1|1	9	1
10	22180687	T	C	missense_variant	Raet1e	ENSMUSG00000053219	transcript	ENSMUST00000065527	protein_coding	c.161T>C	p.Val54Ala	1|1	11	1	1|1	8	1	1|1	7	1	1|1	9	1
10	22181294	A	C	missense_variant	Raet1e	ENSMUSG00000053219	transcript	ENSMUST00000065527	protein_coding	c.516A>C	p.Lys172Asn	1|1	31	1	1|1	31	1	1|1	24	1	1|1	30	0.93
10	22181317	A	G	missense_variant	Raet1e	ENSMUSG00000053219	transcript	ENSMUST00000065527	protein_coding	c.539A>G	p.Gln180Arg	1|1	27	1	1|1	28	1	1|1	22	1	1|1	31	1
10	22181337	C	G	missense_variant	Raet1e	ENSMUSG00000053219	transcript	ENSMUST00000065527	protein_coding	c.559C>G	p.Gln187Glu	1|1	26	1	1|1	30	1	1|1	24	1	1|1	30	1
10	22273432	C	T	5_prime_UTR_premature_start_codon_gain_variant	H60b	ENSMUSG00000075297	transcript	ENSMUST00000131558	protein_coding	c.-138C>T		0/1	20	0.6	0/1	20	0.55	0/1	15	0.4	0/1	21	0.43
10	22273535	G	C	splice_region_variant&intron_variant	H60b	ENSMUSG00000075297	transcript	ENSMUST00000131558	protein_coding	c.-41+6G>C		0/1	30	0.43	0/1	40	0.35	0/1	24	0.42	0/1	41	0.44
10	22285726	C	T	missense_variant	H60b	ENSMUSG00000075297	transcript	ENSMUST00000105522	protein_coding	c.112C>T	p.His38Tyr	0|1	120	0.5	0|1	83	0.49	0|1	98	0.53	0|1	124	0.35
10	22285733	C	A	missense_variant	H60b	ENSMUSG00000075297	transcript	ENSMUST00000105522	protein_coding	c.119C>A	p.Thr40Asn	0|1	115	0.49	0|1	88	0.5	0|1	104	0.54	0|1	124	0.38
10	22285799	G	A	missense_variant	H60b	ENSMUSG00000075297	transcript	ENSMUST00000105522	protein_coding	c.185G>A	p.Gly62Glu	0|1	106	0.5	0|1	99	0.48	0|1	96	0.44	0|1	137	0.34
10	22285810	G	A	missense_variant	H60b	ENSMUSG00000075297	transcript	ENSMUST00000105522	protein_coding	c.196G>A	p.Glu66Lys	0|1	108	0.46	0|1	104	0.51	0|1	97	0.46	0|1	133	0.35
10	22285835	G	A	missense_variant	H60b	ENSMUSG00000075297	transcript	ENSMUST00000105522	protein_coding	c.221G>A	p.Ser74Asn	0/1	109	0.48	0/1	101	0.52	0/1	102	0.5	0/1	141	0.38
10	22285846	C	A	missense_variant	H60b	ENSMUSG00000075297	transcript	ENSMUST00000105522	protein_coding	c.232C>A	p.Leu78Ile	0|1	111	0.49	0|1	105	0.53	0|1	103	0.5	0|1	147	0.42
10	22285856	G	A	missense_variant	H60b	ENSMUSG00000075297	transcript	ENSMUST00000105522	protein_coding	c.242G>A	p.Gly81Glu	0|1	114	0.48	0|1	103	0.53	0|1	102	0.49	0|1	151	0.44
10	22285861	A	T	missense_variant	H60b	ENSMUSG00000075297	transcript	ENSMUST00000105522	protein_coding	c.247A>T	p.Arg83Trp	0|1	116	0.47	0|1	102	0.54	0|1	102	0.46	0|1	151	0.44
10	22285864	AACC	A	disruptive_inframe_deletion	H60b	ENSMUSG00000075297	transcript	ENSMUST00000105522	protein_coding	c.252_254delCCA	p.Asn84_Gln85delinsLys	0|1	116	0.47	0|1	100	0.54	0|1	99	0.44	0|1	151	0.44
10	22285869	G	GTTA	conservative_inframe_insertion	H60b	ENSMUSG00000075297	transcript	ENSMUST00000105522	protein_coding	c.255_256insTTA	p.Gln85_Gln86insLeu	0|1	114	0.47	0|1	98	0.54	0|1	95	0.46	0|1	148	0.45
10	22286148	G	A	missense_variant	H60b	ENSMUSG00000075297	transcript	ENSMUST00000105522	protein_coding	c.271G>A	p.Ala91Thr	0/1	89	0.55	0/1	88	0.45	0/1	100	0.54	0/1	157	0.5
10	22286187	G	A	missense_variant	H60b	ENSMUSG00000075297	transcript	ENSMUST00000105522	protein_coding	c.310G>A	p.Glu104Lys	0|1	85	0.53	0|1	101	0.5	0|1	101	0.53	0|1	166	0.49
10	22286197	G	A	missense_variant	H60b	ENSMUSG00000075297	transcript	ENSMUST00000105522	protein_coding	c.320G>A	p.Gly107Asp	0|1	82	0.55	0|1	99	0.49	0|1	100	0.53	0|1	164	0.51
10	22286303	C	G	missense_variant	H60b	ENSMUSG00000075297	transcript	ENSMUST00000105522	protein_coding	c.426C>G	p.His142Gln	1|1	81	1	1|1	97	1	1|1	99	1	1|1	117	1
10	22286333	C	G	missense_variant	H60b	ENSMUSG00000075297	transcript	ENSMUST00000105522	protein_coding	c.456C>G	p.Ile152Met	0|1	79	0.61	0|1	101	0.47	0|1	97	0.53	0|1	131	0.44
10	22286340	G	T	missense_variant	H60b	ENSMUSG00000075297	transcript	ENSMUST00000105522	protein_coding	c.463G>T	p.Val155Phe	0|1	86	0.57	0|1	102	0.46	0|1	100	0.53	0|1	134	0.46
10	22286350	T	C	missense_variant	H60b	ENSMUSG00000075297	transcript	ENSMUST00000105522	protein_coding	c.473T>C	p.Ile158Thr	0|1	89	0.53	0|1	101	0.48	0|1	99	0.52	0|1	145	0.44
10	22286362	G	A	missense_variant	H60b	ENSMUSG00000075297	transcript	ENSMUST00000105522	protein_coding	c.485G>A	p.Arg162His	0|1	88	0.49	0|1	97	0.49	0|1	95	0.53	0|1	139	0.45
10	22286377	T	C	missense_variant	H60b	ENSMUSG00000075297	transcript	ENSMUST00000105522	protein_coding	c.500T>C	p.Leu167Ser	0|1	98	0.44	0|1	103	0.5	0|1	96	0.53	0|1	143	0.47
10	22286382	C	T	missense_variant	H60b	ENSMUSG00000075297	transcript	ENSMUST00000105522	protein_coding	c.505C>T	p.Pro169Ser	0|1	101	0.43	0|1	101	0.48	0|1	94	0.53	0|1	142	0.47
10	22286403	A	G	missense_variant&splice_region_variant	H60b	ENSMUSG00000075297	transcript	ENSMUST00000105522	protein_coding	c.526A>G	p.Lys176Glu	0/1	98	0.64	0/1	90	0.5	0/1	88	0.48	0/1	134	0.5
10	22287041	A	ATTT	splice_region_variant&intron_variant	H60b	ENSMUSG00000075297	transcript	ENSMUST00000105522	protein_coding	c.527-6_527-4dupTTT		0|1	92	0.47	0/1	79	0.36	0|1	73	0.52	0/1	88	0.45
10	22287060	A	C	missense_variant	H60b	ENSMUSG00000075297	transcript	ENSMUST00000105522	protein_coding	c.533A>C	p.Lys178Thr	0|1	95	0.47	0|1	90	0.39	0|1	85	0.47	0|1	96	0.45
10	22287062	A	T	missense_variant	H60b	ENSMUSG00000075297	transcript	ENSMUST00000105522	protein_coding	c.535A>T	p.Ile179Leu	0|1	95	0.47	0|1	90	0.39	0|1	85	0.46	0|1	99	0.44
10	22287072	T	C	missense_variant	H60b	ENSMUSG00000075297	transcript	ENSMUST00000105522	protein_coding	c.545T>C	p.Leu182Pro	0|1	91	0.51	0|1	94	0.43	0|1	85	0.47	0|1	104	0.44
10	22287083	CAG	C	frameshift_variant	H60b	ENSMUSG00000075297	transcript	ENSMUST00000105522	protein_coding	c.558_559delGA	p.Asn187fs	0|1	86	0.48	0|1	104	0.42	0|1	87	0.46	0|1	110	0.48
10	22287087	A	ACG	frameshift_variant	H60b	ENSMUSG00000075297	transcript	ENSMUST00000105522	protein_coding	c.560_561insCG	p.Thr188fs	0|1	85	0.48	0|1	104	0.43	0|1	86	0.47	0|1	108	0.49
10	22287095	A	G	missense_variant	H60b	ENSMUSG00000075297	transcript	ENSMUST00000105522	protein_coding	c.568A>G	p.Thr190Ala	1|1	86	1	1|1	107	1	1|1	88	1	1|1	106	1
10	22287126	C	T	missense_variant	H60b	ENSMUSG00000075297	transcript	ENSMUST00000105522	protein_coding	c.599C>T	p.Ser200Phe	0|1	87	0.45	0|1	111	0.44	0|1	98	0.46	0|1	113	0.5
10	22287129	A	G	missense_variant	H60b	ENSMUSG00000075297	transcript	ENSMUST00000105522	protein_coding	c.602A>G	p.Gln201Arg	0|1	88	0.44	0|1	113	0.45	0|1	98	0.46	0|1	115	0.5
10	22287144	C	A	missense_variant	H60b	ENSMUSG00000075297	transcript	ENSMUST00000105522	protein_coding	c.617C>A	p.Thr206Asn	0|1	89	0.45	0|1	120	0.47	0|1	104	0.44	0|1	112	0.53
10	22287158	T	G	missense_variant	H60b	ENSMUSG00000075297	transcript	ENSMUST00000105522	protein_coding	c.631T>G	p.Phe211Val	0|1	85	0.46	0|1	123	0.46	0|1	97	0.42	0|1	111	0.53
10	22287191	A	T	missense_variant	H60b	ENSMUSG00000075297	transcript	ENSMUST00000105522	protein_coding	c.664A>T	p.Ile222Leu	0/1	80	0.49	0/1	102	0.43	0/1	94	0.47	0/1	113	0.5
10	22287238	G	GAAAA	frameshift_variant&splice_region_variant	H60b	ENSMUSG00000075297	transcript	ENSMUST00000105522	protein_coding	c.717_720dupAAAA	p.Gly241fs	0/1	83	0.39	0/1	87	0.31	0/1	68	0.52	0/1	92	0.32
10	22361645	G	C	splice_region_variant	Raet1d	ENSMUSG00000078452	transcript	ENSMUST00000182677	protein_coding	c.-119G>C		0/1	18	0.89	0/1	27	0.7	0/1	35	0.83	0/1	20	0.45
10	22370902	C	A	missense_variant	Raet1d	ENSMUSG00000078452	transcript	ENSMUST00000095795	protein_coding	c.128C>A	p.Ala43Asp	0/1	42	0.69	0/1	48	0.56	0/1	50	0.62	0/1	60	0.47
10	22370916	G	GATCCTCTCTGGT	conservative_inframe_insertion	Raet1d	ENSMUSG00000078452	transcript	ENSMUST00000095795	protein_coding	c.144_145insCCTCTCTGGTAT	p.Asp48_Glu49insProLeuTrpTyr	1|1	51	1	1|1	57	1	1|1	54	1	1|1	75	1
10	22370923	T	C	missense_variant	Raet1d	ENSMUSG00000078452	transcript	ENSMUST00000095795	protein_coding	c.149T>C	p.Val50Ala	1|1	49	1	1|1	60	1	1|1	51	1	1|1	71	1
10	22370933	C	A	missense_variant	Raet1d	ENSMUSG00000078452	transcript	ENSMUST00000095795	protein_coding	c.159C>A	p.Phe53Leu	0|1	51	0.51	0|1	68	0.78	0|1	55	0.6	0|1	75	0.75
10	22370938	G	A	missense_variant	Raet1d	ENSMUSG00000078452	transcript	ENSMUST00000095795	protein_coding	c.164G>A	p.Gly55Asp	0|1	53	0.49	0|1	69	0.78	0|1	60	0.58	0|1	76	0.75
10	22371024	G	A	missense_variant	Raet1d	ENSMUSG00000078452	transcript	ENSMUST00000095795	protein_coding	c.250G>A	p.Gly84Arg	0|1	63	0.27	0|1	88	0.25	0|1	77	0.39	0|1	109	0.32
10	22371025	G	A	missense_variant	Raet1d	ENSMUSG00000078452	transcript	ENSMUST00000095795	protein_coding	c.251G>A	p.Gly84Glu	0|1	63	0.27	0|1	88	0.25	0|1	79	0.39	0|1	109	0.32
10	22371027	G	A	missense_variant	Raet1d	ENSMUSG00000078452	transcript	ENSMUST00000095795	protein_coding	c.253G>A	p.Glu85Lys	0|1	65	0.26	0|1	93	0.26	0|1	82	0.4	0|1	110	0.33
10	22371045	C	G	missense_variant	Raet1d	ENSMUSG00000078452	transcript	ENSMUST00000095795	protein_coding	c.271C>G	p.Leu91Val	0|1	68	0.37	0|1	86	0.41	0|1	87	0.29	0|1	113	0.33
10	22371050	A	C	missense_variant	Raet1d	ENSMUSG00000078452	transcript	ENSMUST00000095795	protein_coding	c.276A>C	p.Lys92Asn	0|1	71	0.37	0|1	86	0.41	0|1	88	0.28	0|1	111	0.33
10	22371051	G	A	missense_variant	Raet1d	ENSMUSG00000078452	transcript	ENSMUST00000095795	protein_coding	c.277G>A	p.Asp93Asn	0|1	71	0.24	0|1	85	0.27	0|1	88	0.4	0|1	111	0.33
10	22371072	G	A	missense_variant	Raet1d	ENSMUSG00000078452	transcript	ENSMUST00000095795	protein_coding	c.298G>A	p.Asp100Asn	0/1	72	0.64	0/1	87	0.64	0/1	91	0.64	0/1	107	0.66
10	22371362	T	C	splice_region_variant&intron_variant	Raet1d	ENSMUSG00000078452	transcript	ENSMUST00000095795	protein_coding	c.341-5T>C		0/1	37	0.68	0/1	25	0.8	0/1	42	0.81	0/1	64	0.89
10	22371400	C	T	missense_variant	Raet1d	ENSMUSG00000078452	transcript	ENSMUST00000095795	protein_coding	c.374C>T	p.Pro125Leu	0/1	23	0.35	0/1	20	0.4	0/1	27	0.3	0/1	51	0.35
10	22371415	A	G	missense_variant	Raet1d	ENSMUSG00000078452	transcript	ENSMUST00000095795	protein_coding	c.389A>G	p.Gln130Arg	0/1	25	0.48	0/1	16	0.5	0/1	26	0.42	0/1	40	0.53
10	22371418	C	T	missense_variant	Raet1d	ENSMUSG00000078452	transcript	ENSMUST00000095795	protein_coding	c.392C>T	p.Thr131Ile	0/1	24	0.29	0/1	16	0.38	0/1	27	0.37	0/1	40	0.4
10	22371481	T	A	missense_variant	Raet1d	ENSMUSG00000078452	transcript	ENSMUST00000095795	protein_coding	c.455T>A	p.Ile152Asn	1|1	38	1	1|1	24	1	1|1	33	1	1|1	39	1
10	22371559	A	G	missense_variant	Raet1d	ENSMUSG00000078452	transcript	ENSMUST00000095795	protein_coding	c.533A>G	p.Gln178Arg	0|1	47	0.32	0|1	39	0.51	0|1	38	0.47	0|1	63	0.51
10	22371577	A	C	missense_variant	Raet1d	ENSMUSG00000078452	transcript	ENSMUST00000095795	protein_coding	c.551A>C	p.His184Pro	0|1	47	0.3	0|1	39	0.46	0|1	34	0.41	0|1	62	0.44
10	22371580	G	A	missense_variant	Raet1d	ENSMUSG00000078452	transcript	ENSMUST00000095795	protein_coding	c.554G>A	p.Gly185Glu	1|1	46	1	1|1	38	1	1|1	33	1	1|1	58	1
10	22371587	T	A	missense_variant	Raet1d	ENSMUSG00000078452	transcript	ENSMUST00000095795	protein_coding	c.561T>A	p.Ser187Arg	0|1	44	0.3	0|1	38	0.45	0|1	27	0.44	0|1	60	0.47
10	22371591	A	G	missense_variant	Raet1d	ENSMUSG00000078452	transcript	ENSMUST00000095795	protein_coding	c.565A>G	p.Lys189Glu	0|1	46	0.28	0|1	39	0.44	0|1	28	0.43	0|1	57	0.47
10	22371594	A	G	missense_variant	Raet1d	ENSMUSG00000078452	transcript	ENSMUST00000095795	protein_coding	c.568A>G	p.Met190Val	0|1	44	0.3	0|1	39	0.44	0|1	28	0.43	0|1	57	0.47
10	22371596	G	T	missense_variant	Raet1d	ENSMUSG00000078452	transcript	ENSMUST00000095795	protein_coding	c.570G>T	p.Met190Ile	0|1	44	0.3	0|1	38	0.45	0|1	26	0.46	0|1	57	0.47
10	22371615	T	C	missense_variant	Raet1d	ENSMUSG00000078452	transcript	ENSMUST00000095795	protein_coding	c.589T>C	p.Ser197Pro	0|1	38	0.34	0|1	32	0.41	0|1	20	0.55	0|1	51	0.51
10	22371634	G	A	splice_region_variant&intron_variant	Raet1d	ENSMUSG00000078452	transcript	ENSMUST00000095795	protein_coding	c.604+4G>A		0|1	33	0.39	0|1	33	0.33	0|1	18	0.56	0|1	47	0.47
10	22371636	T	C	splice_region_variant&intron_variant	Raet1d	ENSMUSG00000078452	transcript	ENSMUST00000095795	protein_coding	c.604+6T>C		0|1	33	0.39	0|1	33	0.33	0|1	18	0.56	0|1	46	0.46
10	22372248	A	C	missense_variant	Raet1d	ENSMUSG00000078452	transcript	ENSMUST00000095795	protein_coding	c.664A>C	p.Thr222Pro	1|1	10	1	1|1	14	1	1|1	12	1	1|1	16	1
10	22403260	G	A	splice_region_variant&non_coding_transcript_exon_variant	Gm10825	ENSMUSG00000096937	transcript	ENSMUST00000180537	lincRNA	n.268G>A		0/1	27	0.19	0/1	38	0.26	0/1	38	0.24	0/1	31	0.13
10	23805880	A	ATT	splice_acceptor_variant&intron_variant	Slc18b1	ENSMUSG00000037455	transcript	ENSMUST00000179321	protein_coding	c.354-4_354-3dupTT		1|1	22	1	1|1	15	1	1|1	13	1	1|1	33	1
10	23856191	T	G	splice_region_variant&intron_variant	Vnn3	ENSMUSG00000020010	transcript	ENSMUST00000020190	protein_coding	c.345-7T>G		1|1	31	1	1|1	19	1	1|1	35	1	1|1	25	1
10	23856262	A	G	missense_variant	Vnn3	ENSMUSG00000020010	transcript	ENSMUST00000020190	protein_coding	c.409A>G	p.Met137Val	1|1	24	1	1|1	29	1	1|1	22	1	1|1	21	1
10	23864425	A	G	missense_variant	Vnn3	ENSMUSG00000020010	transcript	ENSMUST00000020190	protein_coding	c.625A>G	p.Ile209Val	1|1	23	1	1|1	24	1	1|1	15	1	1|1	39	1
10	23864561	T	C	missense_variant	Vnn3	ENSMUSG00000020010	transcript	ENSMUST00000020190	protein_coding	c.761T>C	p.Val254Ala	1|1	26	1	1|1	13	1	1|1	15	1	1|1	30	1
10	23865831	G	A	missense_variant	Vnn3	ENSMUSG00000020010	transcript	ENSMUST00000020190	protein_coding	c.1033G>A	p.Glu345Lys	1|1	29	1	1|1	22	1	1|1	22	1	1|1	24	1
10	23894883	T	C	missense_variant	Vnn1	ENSMUSG00000037440	transcript	ENSMUST00000041416	protein_coding	c.8T>C	p.Met3Thr	1|1	18	1	1|1	30	1	1|1	21	1	1|1	17	1
10	24037966	T	G	missense_variant	Taar7e	ENSMUSG00000069703	transcript	ENSMUST00000092656	protein_coding	c.353T>G	p.Ile118Ser	1|1	24	1	1|1	25	1	1|1	13	1	1|1	21	1
10	24231198	C	T	splice_region_variant&non_coding_transcript_exon_variant	Moxd1	ENSMUSG00000020000	transcript	ENSMUST00000154916	processed_transcript	n.430C>T		1|1	28	1	1|1	20	1	1|1	25	1	1|1	23	1
10	24580099	CT	C	splice_region_variant&intron_variant	Gm15270	ENSMUSG00000087400	transcript	ENSMUST00000136908	processed_transcript	n.327+8delA		1|1	29	1	1|1	37	1	1|1	18	1	1|1	10	1
10	24595883	T	C	start_lost	Ctgf	ENSMUSG00000019997	transcript	ENSMUST00000129142	protein_coding	c.2T>C	p.Met1?	1|1	15	1	1|1	22	1	1|1	16	1	1|1	25	1
10	24596342	C	T	splice_region_variant&intron_variant	Ctgf	ENSMUSG00000019997	transcript	ENSMUST00000020171	protein_coding	c.287-5C>T		1|1	28	1	1|1	24	1	1|1	22	1	1|1	40	1
10	24651248	A	C	missense_variant	Enpp1	ENSMUSG00000037370	transcript	ENSMUST00000135846	protein_coding	c.2040T>G	p.Ser680Arg	1|1	27	1	1|1	25	1	1|1	32	1	1|1	32	1
10	24651336	C	T	missense_variant	Enpp1	ENSMUSG00000037370	transcript	ENSMUST00000135846	protein_coding	c.1952G>A	p.Arg651His	1|1	28	1	1|1	18	1	1|1	25	1	1|1	35	1
10	24793634	T	C	missense_variant	Enpp3	ENSMUSG00000019989	transcript	ENSMUST00000020169	protein_coding	c.1427A>G	p.Asn476Ser	1|1	23	1	1|1	15	1	1|1	25	1	1|1	34	1
10	24798287	A	AAAAAT	splice_region_variant&intron_variant	Enpp3	ENSMUSG00000019989	transcript	ENSMUST00000020169	protein_coding	c.1121-12_1121-8dupATTTT		1|1	17	1	1|1	16	1	1|1	16	1	1|1	22	1
10	24809941	G	A	splice_region_variant&intron_variant	Enpp3	ENSMUSG00000019989	transcript	ENSMUST00000020169	protein_coding	c.563-8C>T		1|1	15	1	1|1	27	1	1|1	25	1	1|1	31	1
10	24817968	A	G	splice_region_variant&intron_variant	Enpp3	ENSMUSG00000019989	transcript	ENSMUST00000020169	protein_coding	c.465-4T>C		1|1	23	1	1|1	16	1	1|1	29	1	1|1	32	1
10	24817972	T	C	splice_region_variant&intron_variant	Enpp3	ENSMUSG00000019989	transcript	ENSMUST00000020169	protein_coding	c.465-8A>G		1|1	23	1	1|1	16	1	1|1	29	1	1|1	32	1
10	24895701	G	C	splice_region_variant&intron_variant	Med23	ENSMUSG00000019984	transcript	ENSMUST00000092646	protein_coding	c.1641-5G>C		1|1	33	1	1|1	22	1	1|1	31	1	1|1	43	1
10	24895855	G	C	splice_region_variant&intron_variant	Med23	ENSMUSG00000019984	transcript	ENSMUST00000092646	protein_coding	c.1783+7G>C		1|1	36	1	1|1	19	1	1|1	22	1	1|1	31	1
10	24901969	ATCCAGTGACATGAACTTCGAATCT	A	splice_region_variant&intron_variant	Med23	ENSMUSG00000019984	transcript	ENSMUST00000092646	protein_coding	c.2248-30_2248-7delAGTGACATGAACTTCGAATCTTCC		1|1	25	1	1|1	26	1	1|1	20	1	1|1	26	1
10	25495517	G	A	missense_variant	Epb4.1l2	ENSMUSG00000019978	transcript	ENSMUST00000053748	protein_coding	c.1918G>A	p.Ala640Thr	1|1	17	1	1|1	13	1	1|1	24	1	1|1	33	1
10	25535991	G	T	missense_variant	Smlr1	ENSMUSG00000096546	transcript	ENSMUST00000179685	protein_coding	c.97C>A	p.Leu33Ile	1|1	27	1	1|1	32	1	1|1	21	1	1|1	22	1
10	25536102	G	A	5_prime_UTR_premature_start_codon_gain_variant	Smlr1	ENSMUSG00000096546	transcript	ENSMUST00000179685	protein_coding	c.-15C>T		1|1	43	1	1|1	32	1	1|1	16	1	1|1	21	1
10	26984458	C	T	missense_variant	Lama2	ENSMUSG00000019899	transcript	ENSMUST00000092639	protein_coding	c.9032G>A	p.Gly3011Glu	1|1	37	1	1|1	18	1	1|1	25	1	1|1	33	1
10	26986926	GA	G	splice_region_variant&intron_variant	Lama2	ENSMUSG00000019899	transcript	ENSMUST00000092639	protein_coding	c.8846-7delT		1|1	24	1	1|1	19	1	1|1	29	1	1|1	34	1
10	26993405	A	G	splice_region_variant&synonymous_variant	Lama2	ENSMUSG00000019899	transcript	ENSMUST00000092639	protein_coding	c.8343T>C	p.Asn2781Asn	1|1	9	1	1|1	16	1	1|1	10	1	1|1	20	1
10	27105138	C	T	missense_variant	Lama2	ENSMUSG00000019899	transcript	ENSMUST00000092639	protein_coding	c.5519G>A	p.Arg1840Gln	1|1	22	1	1|1	20	1	1|1	27	1	1|1	46	1
10	27120050	G	T	missense_variant	Lama2	ENSMUSG00000019899	transcript	ENSMUST00000092639	protein_coding	c.5080C>A	p.Gln1694Lys	1|1	24	1	1|1	25	1	1|1	20	1	1|1	28	1
10	27212223	T	C	missense_variant	Lama2	ENSMUSG00000019899	transcript	ENSMUST00000092639	protein_coding	c.2557A>G	p.Ile853Val	1|1	31	1	1|1	14	1	1|1	29	1	1|1	32	1
10	27265066	T	C	missense_variant	Lama2	ENSMUSG00000019899	transcript	ENSMUST00000092639	protein_coding	c.1936A>G	p.Ile646Val	1|1	31	1	1|1	22	1	1|1	24	1	1|1	35	1
10	27344580	G	GAA	splice_region_variant&intron_variant	Lama2	ENSMUSG00000019899	transcript	ENSMUST00000092639	protein_coding	c.1295-9_1295-8dupTT		1|1	21	1	1|1	17	1	1|1	21	1	1|1	33	1
10	27346989	T	C	splice_region_variant&intron_variant	Lama2	ENSMUSG00000019899	transcript	ENSMUST00000092639	protein_coding	c.1294+6A>G		1|1	17	1	1|1	5	1	1|1	10	1	1|1	28	1
10	27347092	T	C	splice_region_variant&synonymous_variant	Lama2	ENSMUSG00000019899	transcript	ENSMUST00000092639	protein_coding	c.1197A>G	p.Val399Val	1|1	21	1	1|1	8	1	1|1	15	1	1|1	35	1
10	27350247	T	C	splice_region_variant&intron_variant	Lama2	ENSMUSG00000019899	transcript	ENSMUST00000092639	protein_coding	c.1194+6A>G		1|1	30	1	1|1	12	1	1|1	21	1	1|1	31	1
10	43997311	C	T	missense_variant	Aim1	ENSMUSG00000019866	transcript	ENSMUST00000020017	protein_coding	c.2678G>A	p.Arg893His	1|1	20	1	1|1	30	1	1|1	18	1	1|1	37	1
10	58223007	G	A	missense_variant	AW822073	ENSMUSG00000058537	transcript	ENSMUST00000174056	protein_coding	c.1102C>T	p.Pro368Ser	0/1	25	0.28	0/1	36	0.22	0/1	15	0.27	0/1	25	0.2
10	58223105	A	T	missense_variant	AW822073	ENSMUSG00000058537	transcript	ENSMUST00000174056	protein_coding	c.1004T>A	p.Leu335Gln	0|1	27	0.15	0|1	33	0.12	0|1	16	0.25	0|1	36	0.19
10	58223150	G	A	missense_variant	AW822073	ENSMUSG00000058537	transcript	ENSMUST00000174056	protein_coding	c.959C>T	p.Thr320Ile	0/1	51	0.61	0/1	72	0.64	0/1	39	0.59	0/1	72	0.62
10	58223208	C	T	missense_variant	AW822073	ENSMUSG00000058537	transcript	ENSMUST00000174056	protein_coding	c.901G>A	p.Glu301Lys	0|1	84	0.79	0|1	124	0.9	0|1	72	0.78	0|1	103	0.81
10	58223220	T	C	missense_variant	AW822073	ENSMUSG00000058537	transcript	ENSMUST00000174056	protein_coding	c.889A>G	p.Thr297Ala	0|1	96	0.82	0|1	142	0.91	0|1	85	0.82	0|1	120	0.82
10	58223388	G	A	missense_variant	AW822073	ENSMUSG00000058537	transcript	ENSMUST00000174056	protein_coding	c.721C>T	p.Leu241Phe	0/1	188	0.52	0/1	308	0.63	0/1	159	0.5	0/1	235	0.57
10	58223447	A	G	missense_variant	AW822073	ENSMUSG00000058537	transcript	ENSMUST00000075305	protein_coding	c.80T>C	p.Val27Ala	0/1	71	0.75	0/1	114	0.77	0/1	73	0.63	0/1	95	0.67
10	58223454	A	G	missense_variant	AW822073	ENSMUSG00000058537	transcript	ENSMUST00000075305	protein_coding	c.73T>C	p.Cys25Arg	0|1	65	0.63	0|1	107	0.62	0|1	71	0.48	0|1	87	0.52
10	58223456	G	C	missense_variant	AW822073	ENSMUSG00000058537	transcript	ENSMUST00000075305	protein_coding	c.71C>G	p.Pro24Arg	0|1	66	0.62	0|1	107	0.62	0|1	69	0.49	0|1	88	0.51
10	58223478	G	T	missense_variant	AW822073	ENSMUSG00000058537	transcript	ENSMUST00000075305	protein_coding	c.49C>A	p.Gln17Lys	0|1	31	0.19	0|1	45	0.42	0|1	50	0.34	0|1	46	0.17
10	58224225	T	G	splice_region_variant&intron_variant	AW822073	ENSMUSG00000058537	transcript	ENSMUST00000174056	protein_coding	c.700+6A>C		0/1	108	0.85	0/1	110	0.88	0/1	106	0.79	0/1	121	0.81
10	58224245	T	C	missense_variant	AW822073	ENSMUSG00000058537	transcript	ENSMUST00000174056	protein_coding	c.686A>G	p.Gln229Arg	0/1	75	0.4	0/1	71	0.42	0/1	67	0.34	0/1	82	0.29
10	58224266	A	C	missense_variant	AW822073	ENSMUSG00000058537	transcript	ENSMUST00000174056	protein_coding	c.665T>G	p.Val222Gly	0/1	49	0.76	0/1	58	0.64	0/1	48	0.67	0/1	51	0.59
10	58224314	G	A	missense_variant	AW822073	ENSMUSG00000058537	transcript	ENSMUST00000174056	protein_coding	c.617C>T	p.Ser206Phe	0/1	93	0.87	0/1	148	0.87	0/1	90	0.79	0/1	120	0.81
10	58224383	C	T	missense_variant	AW822073	ENSMUSG00000058537	transcript	ENSMUST00000174056	protein_coding	c.548G>A	p.Ser183Asn	0/1	214	0.9	0/1	349	0.91	0/1	171	0.84	0/1	284	0.9
10	58224498	A	G	missense_variant	AW822073	ENSMUSG00000058537	transcript	ENSMUST00000174056	protein_coding	c.433T>C	p.Trp145Arg	0/1	121	0.79	0/1	173	0.86	0/1	106	0.78	0/1	157	0.76
10	58224882	C	T	missense_variant	AW822073	ENSMUSG00000058537	transcript	ENSMUST00000174056	protein_coding	c.49G>A	p.Glu17Lys	0|1	71	0.68	0/1	82	0.73	0|1	54	0.69	0/1	111	0.59
10	58225076	A	G	5_prime_UTR_premature_start_codon_gain_variant	AW822073	ENSMUSG00000058537	transcript	ENSMUST00000174056	protein_coding	c.-146T>C		0/1	155	0.81	0/1	189	0.89	0/1	125	0.86	0/1	187	0.87
10	58225202	T	G	5_prime_UTR_premature_start_codon_gain_variant	AW822073	ENSMUSG00000058537	transcript	ENSMUST00000174056	protein_coding	c.-272A>C		1|1	428	0.93	1|1	620	0.96	1|1	419	0.95	1|1	512	0.95
10	61696402	G	C	missense_variant	Tysnd1	ENSMUSG00000020087	transcript	ENSMUST00000020284	protein_coding	c.832G>C	p.Ala278Pro	0/1	14	0.5	0/1	31	0.65	0/1	23	0.48	0/1	29	0.45
10	67238174	T	C	missense_variant	Jmjd1c	ENSMUSG00000037876	transcript	ENSMUST00000174408	protein_coding	c.5687T>C	p.Leu1896Pro	1|1	31	1	1|1	27	1	1|1	23	1	1|1	29	1
10	67886104	G	A	splice_region_variant	Zfp365	ENSMUSG00000037855	transcript	ENSMUST00000064656	protein_coding	c.*2726C>T		1|1	22	1	1|1	22	1	1|1	24	1	1|1	39	1
10	67889051	T	G	missense_variant	Zfp365	ENSMUSG00000037855	transcript	ENSMUST00000064656	protein_coding	c.1006A>C	p.Met336Leu	1|1	35	1	1|1	26	1	1|1	18	1	1|1	32	1
10	67897620	G	A	splice_region_variant&intron_variant	Zfp365	ENSMUSG00000037855	transcript	ENSMUST00000064656	protein_coding	c.747-6C>T		1|1	29	1	1|1	31	1	1|1	41	1	1|1	19	1
10	67909658	A	G	missense_variant	Zfp365	ENSMUSG00000037855	transcript	ENSMUST00000064656	protein_coding	c.289T>C	p.Ser97Pro	1|1	14	1	1|1	28	1	1|1	18	1	1|1	47	1
10	67912372	G	A	splice_region_variant	Zfp365	ENSMUSG00000037855	transcript	ENSMUST00000064656	protein_coding	c.-15C>T		1|1	23	1	1|1	31	1	1|1	14	1	1|1	27	1
10	68017798	G	A	splice_region_variant&intron_variant	Rtkn2	ENSMUSG00000037846	transcript	ENSMUST00000118160	protein_coding	c.672-8G>A		1|1	26	1	1|1	31	1	1|1	30	1	1|1	34	1
10	68026499	C	CT	splice_region_variant&intron_variant	Rtkn2	ENSMUSG00000037846	transcript	ENSMUST00000118160	protein_coding	c.874-9dupT		1|1	14	0.86	1|1	30	1	1|1	21	1	1|1	34	0.94
10	68041447	C	G	missense_variant	Rtkn2	ENSMUSG00000037846	transcript	ENSMUST00000118160	protein_coding	c.1345C>G	p.Arg449Gly	1|1	31	1	1|1	13	1	1|1	17	1	1|1	35	1
10	68041553	T	C	missense_variant	Rtkn2	ENSMUSG00000037846	transcript	ENSMUST00000118160	protein_coding	c.1451T>C	p.Ile484Thr	1|1	34	1	1|1	11	1	1|1	15	1	1|1	48	1
10	68041647	A	C	missense_variant	Rtkn2	ENSMUSG00000037846	transcript	ENSMUST00000118160	protein_coding	c.1545A>C	p.Arg515Ser	1|1	24	1	1|1	18	1	1|1	23	1	1|1	46	1
10	68041699	T	C	missense_variant	Rtkn2	ENSMUSG00000037846	transcript	ENSMUST00000118160	protein_coding	c.1597T>C	p.Ser533Pro	1|1	25	1	1|1	18	1	1|1	29	1	1|1	38	1
10	68041703	C	T	missense_variant	Rtkn2	ENSMUSG00000037846	transcript	ENSMUST00000118160	protein_coding	c.1601C>T	p.Ser534Leu	1|1	26	1	1|1	18	1	1|1	30	1	1|1	38	1
10	68041724	C	T	missense_variant	Rtkn2	ENSMUSG00000037846	transcript	ENSMUST00000118160	protein_coding	c.1622C>T	p.Ser541Leu	1|1	28	1	1|1	16	1	1|1	25	1	1|1	36	1
10	68041727	C	T	missense_variant	Rtkn2	ENSMUSG00000037846	transcript	ENSMUST00000118160	protein_coding	c.1625C>T	p.Pro542Leu	1|1	28	1	1|1	16	1	1|1	25	1	1|1	35	1
10	68050685	G	A	splice_acceptor_variant&intron_variant	Rtkn2	ENSMUSG00000037846	transcript	ENSMUST00000123147	processed_transcript	n.186-1G>A		1|1	29	1	1|1	22	1	1|1	31	1	1|1	33	1
10	68096905	C	T	missense_variant	Arid5b	ENSMUSG00000019947	transcript	ENSMUST00000020106	protein_coding	c.3166G>A	p.Gly1056Ser	1|1	20	1	1|1	14	1	1|1	18	1	1|1	29	1
10	68097289	T	C	missense_variant	Arid5b	ENSMUSG00000019947	transcript	ENSMUST00000020106	protein_coding	c.2782A>G	p.Thr928Ala	1|1	28	1	1|1	24	1	1|1	11	1	1|1	21	1
10	68098632	T	C	missense_variant	Arid5b	ENSMUSG00000019947	transcript	ENSMUST00000020106	protein_coding	c.1439A>G	p.Asn480Ser	1|1	35	1	1|1	21	1	1|1	22	1	1|1	30	1
10	68098651	T	C	missense_variant	Arid5b	ENSMUSG00000019947	transcript	ENSMUST00000020106	protein_coding	c.1420A>G	p.Lys474Glu	1|1	34	1	1|1	20	1	1|1	19	1	1|1	23	1
10	68118244	A	G	splice_region_variant&intron_variant	Arid5b	ENSMUSG00000019947	transcript	ENSMUST00000020106	protein_coding	c.1202+7T>C		1|1	23	1	1|1	23	1	1|1	21	1	1|1	35	1
10	70927801	A	G	splice_region_variant&intron_variant	Bicc1	ENSMUSG00000014329	transcript	ENSMUST00000131445	protein_coding	c.2555-7T>C		1|1	15	1	1|1	20	1	1|1	17	1	1|1	25	1
10	80417365	C	T	missense_variant	Tcf3	ENSMUSG00000020167	transcript	ENSMUST00000105342	protein_coding	c.764G>A	p.Ser255Asn	0/1	22	0.41	0/1	58	0.52	0/1	21	0.52	0/1	27	0.48
10	81643563	T	TGCAGAGGCGGAG	disruptive_inframe_insertion	Ankrd24	ENSMUSG00000054708	transcript	ENSMUST00000119336	protein_coding	c.2363_2364insGGAGGCAGAGGC	p.Ala788_Glu789insGluAlaGluAla	1|1	16	1	1|1	20	1	1|1	19	1	1|1	20	1
10	82226062	A	T	missense_variant	Zfp938	ENSMUSG00000062931	transcript	ENSMUST00000041264	protein_coding	c.723T>A	p.Asp241Glu	1|1	16	1	1|1	17	1	1|1	24	1	1|1	26	1
10	82226120	C	T	missense_variant	Zfp938	ENSMUSG00000062931	transcript	ENSMUST00000041264	protein_coding	c.665G>A	p.Cys222Tyr	1|1	13	1	1|1	18	1	1|1	25	1	1|1	29	1
10	82241227	C	T	5_prime_UTR_premature_start_codon_gain_variant	Zfp938	ENSMUSG00000062931	transcript	ENSMUST00000041264	protein_coding	c.-54G>A		1|1	26	1	1|1	15	1	1|1	18	1	1|1	25	1
10	82284600	G	C	missense_variant	4932415D10Rik	ENSMUSG00000044581	transcript	ENSMUST00000171401	protein_coding	c.665C>G	p.Ser222Cys	1|1	42	1	1|1	9	1	1|1	22	1	1|1	26	1
10	82284880	T	C	missense_variant	4932415D10Rik	ENSMUSG00000044581	transcript	ENSMUST00000171401	protein_coding	c.385A>G	p.Ile129Val	1|1	17	1	1|1	24	1	1|1	23	1	1|1	30	1
10	82378764	G	C	missense_variant	Gm4924	ENSMUSG00000073427	transcript	ENSMUST00000165906	protein_coding	c.172G>C	p.Gly58Arg	1|1	40	1	1|1	22	1	1|1	43	1	1|1	35	1
10	82378765	G	A	missense_variant	Gm4924	ENSMUSG00000073427	transcript	ENSMUST00000165906	protein_coding	c.173G>A	p.Gly58Glu	1|1	40	1	1|1	22	1	1|1	43	1	1|1	35	1
10	82378828	G	A	missense_variant	Gm4924	ENSMUSG00000073427	transcript	ENSMUST00000165906	protein_coding	c.236G>A	p.Ser79Asn	1|1	38	0.97	1|1	15	1	1|1	47	1	1|1	32	1
10	82379004	A	G	missense_variant	Gm4924	ENSMUSG00000073427	transcript	ENSMUST00000165906	protein_coding	c.412A>G	p.Ile138Val	1|1	26	1	1|1	16	1	1|1	28	1	1|1	28	1
10	82492194	G	T	missense_variant	Gm1553	ENSMUSG00000094186	transcript	ENSMUST00000177934	protein_coding	c.178C>A	p.Leu60Met	1|1	25	1	1|1	21	1	1|1	34	1	1|1	19	1
10	82620026	C	A	splice_region_variant	1190007I07Rik	ENSMUSG00000063320	transcript	ENSMUST00000183363	protein_coding	c.*96G>T		1|1	19	1	1|1	24	1	1|1	23	1	1|1	37	1
10	82622830	G	A	splice_region_variant&intron_variant	1190007I07Rik	ENSMUSG00000063320	transcript	ENSMUST00000183416	protein_coding	c.-9-6C>T		1|1	13	1	1|1	20	1	1|1	15	1	1|1	25	1
10	82623137	T	C	5_prime_UTR_premature_start_codon_gain_variant	1190007I07Rik	ENSMUSG00000063320	transcript	ENSMUST00000079648	protein_coding	c.-182A>G		1|1	15	1	1|1	12	1	1|1	17	1	1|1	32	1
10	82623149	G	C	splice_region_variant&intron_variant	1190007I07Rik	ENSMUSG00000063320	transcript	ENSMUST00000185168	protein_coding	c.-10+4C>G		1|1	14	1	1|1	10	1	1|1	18	1	1|1	28	1
10	82623196	G	A	5_prime_UTR_premature_start_codon_gain_variant	1190007I07Rik	ENSMUSG00000063320	transcript	ENSMUST00000185168	protein_coding	c.-53C>T		1|1	13	1	1|1	13	1	1|1	16	1	1|1	23	1
10	82638847	A	C	missense_variant	Tdg	ENSMUSG00000034674	transcript	ENSMUST00000151390	protein_coding	c.170A>C	p.Glu57Ala	1|1	26	1	1|1	23	1	1|1	24	1	1|1	40	1
10	82647345	G	A	missense_variant	Tdg	ENSMUSG00000034674	transcript	ENSMUST00000151390	protein_coding	c.949G>A	p.Ala317Thr	1|1	20	1	1|1	19	1	1|1	12	1	1|1	31	1
10	82648020	T	C	missense_variant	Tdg	ENSMUSG00000034674	transcript	ENSMUST00000177353	protein_coding	c.569T>C	p.Val190Ala	1|1	26	1	1|1	24	1	1|1	31	1	1|1	36	1
10	82648582	T	C	splice_region_variant&non_coding_transcript_exon_variant	Tdg	ENSMUSG00000034674	transcript	ENSMUST00000176195	nonsense_mediated_decay	n.*385T>C		1|1	16	1	1|1	20	1	1|1	21	1	1|1	24	1
10	82648610	G	A	missense_variant	Tdg	ENSMUSG00000034674	transcript	ENSMUST00000151390	protein_coding	c.1156G>A	p.Ala386Thr	1|1	13	1	1|1	15	1	1|1	18	1	1|1	18	1
10	82648616	A	G	missense_variant	Tdg	ENSMUSG00000034674	transcript	ENSMUST00000151390	protein_coding	c.1162A>G	p.Ser388Gly	1|1	13	1	1|1	15	1	1|1	18	1	1|1	18	1
10	82650799	C	T	splice_region_variant	Tdg	ENSMUSG00000034674	transcript	ENSMUST00000151390	protein_coding	c.*2079C>T		1|1	26	1	1|1	25	1	1|1	26	1	1|1	29	1
10	82652584	A	T	missense_variant	Glt8d2	ENSMUSG00000020251	transcript	ENSMUST00000065815	protein_coding	c.1051T>A	p.Ser351Thr	1|1	24	1	1|1	23	1	1|1	16	1	1|1	30	1
10	82652641	C	T	missense_variant	Glt8d2	ENSMUSG00000020251	transcript	ENSMUST00000065815	protein_coding	c.994G>A	p.Ala332Thr	1|1	18	1	1|1	29	1	1|1	15	1	1|1	32	1
10	82652643	C	T	missense_variant	Glt8d2	ENSMUSG00000020251	transcript	ENSMUST00000065815	protein_coding	c.992G>A	p.Cys331Tyr	1|1	18	1	1|1	29	1	1|1	16	1	1|1	32	1
10	82652644	A	G	missense_variant	Glt8d2	ENSMUSG00000020251	transcript	ENSMUST00000065815	protein_coding	c.991T>C	p.Cys331Arg	1|1	18	1	1|1	29	1	1|1	17	1	1|1	32	1
10	82652650	C	CTG	frameshift_variant	Glt8d2	ENSMUSG00000020251	transcript	ENSMUST00000065815	protein_coding	c.983_984dupCA	p.Val329fs	1|1	18	1	1|1	30	1	1|1	18	1	1|1	32	1
10	82652679	A	ATCCTTT	conservative_inframe_insertion	Glt8d2	ENSMUSG00000020251	transcript	ENSMUST00000065815	protein_coding	c.955_956insAAAGGA	p.Lys318_Ile319insLysArg	1|1	17	1	1|1	32	1	1|1	15	1	1|1	32	1
10	82652869	G	A	splice_region_variant&synonymous_variant	Glt8d2	ENSMUSG00000020251	transcript	ENSMUST00000065815	protein_coding	c.885C>T	p.Leu295Leu	1|1	25	1	1|1	29	1	1|1	31	1	1|1	25	1
10	82670307	T	C	missense_variant	Glt8d2	ENSMUSG00000020251	transcript	ENSMUST00000065815	protein_coding	c.89A>G	p.His30Arg	1|1	23	1	1|1	15	1	1|1	27	1	1|1	32	1
10	82670333	G	A	synonymous_variant	Glt8d2	ENSMUSG00000020251	transcript	ENSMUST00000065815	protein_coding	c.63C>T	p.Leu21Leu	1|1	21	1	1|1	17	1	1|1	31	1	1|1	28	1
10	82672049	G	A	splice_region_variant&intron_variant	Glt8d2	ENSMUSG00000020251	transcript	ENSMUST00000065815	protein_coding	c.25+8C>T		1|1	28	1	1|1	19	1	1|1	34	1	1|1	39	1
10	82750473	A	AT	splice_region_variant&non_coding_transcript_exon_variant	Nfyb	ENSMUSG00000020248	transcript	ENSMUST00000145561	retained_intron	n.620dupA		1|1	10	1	1|1	21	0.9	1|1	26	0.92	1|1	23	1
10	82859253	C	T	5_prime_UTR_premature_start_codon_gain_variant	Txnrd1	ENSMUSG00000020250	transcript	ENSMUST00000020484	protein_coding	c.-191C>T		1|1	22	1	1|1	17	1	1|1	28	1	1|1	32	1
10	82884938	A	G	splice_region_variant&intron_variant	Txnrd1	ENSMUSG00000020250	transcript	ENSMUST00000020484	protein_coding	c.936-4A>G		1|1	27	1	1|1	37	1	1|1	19	1	1|1	35	1
10	82954524	A	C	missense_variant	Gm4799	ENSMUSG00000071151	transcript	ENSMUST00000095396	protein_coding	c.181A>C	p.Thr61Pro	1|1	24	1	1|1	23	1	1|1	12	1	1|1	18	1
10	82954564	T	G	missense_variant	Gm4799	ENSMUSG00000071151	transcript	ENSMUST00000095396	protein_coding	c.221T>G	p.Leu74Arg	1|1	24	1	1|1	25	1	1|1	14	1	1|1	12	1
10	82954636	T	C	missense_variant	Gm4799	ENSMUSG00000071151	transcript	ENSMUST00000095396	protein_coding	c.293T>C	p.Val98Ala	1|1	19	1	1|1	28	1	1|1	12	1	1|1	16	1
10	82954747	C	T	missense_variant	Gm4799	ENSMUSG00000071151	transcript	ENSMUST00000095396	protein_coding	c.404C>T	p.Thr135Ile	1|1	18	1	1|1	23	1	1|1	17	1	1|1	22	1
10	83508124	A	G	missense_variant	Aldh1l2	ENSMUSG00000020256	transcript	ENSMUST00000020497	protein_coding	c.1426T>C	p.Tyr476His	1|1	17	1	1|1	27	1	1|1	37	1	1|1	38	1
10	84584755	C	G	5_prime_UTR_premature_start_codon_gain_variant	Tcp11l2	ENSMUSG00000020034	transcript	ENSMUST00000020223	protein_coding	c.-144C>G		1|1	12	1	1|1	14	1	1|1	18	1	1|1	19	1
10	84584757	C	G	5_prime_UTR_premature_start_codon_gain_variant	Tcp11l2	ENSMUSG00000020034	transcript	ENSMUST00000020223	protein_coding	c.-142C>G		1|1	12	1	1|1	16	1	1|1	20	1	1|1	19	1
10	84880976	TA	T	splice_region_variant&intron_variant	Rfx4	ENSMUSG00000020037	transcript	ENSMUST00000060397	protein_coding	c.1633+5delA		1|1	28	1	1|1	44	1	1|1	31	1	1|1	27	1
10	85314011	G	A	missense_variant	Gm8394	ENSMUSG00000050490	transcript	ENSMUST00000079684	protein_coding	c.443G>A	p.Gly148Glu	1|1	16	1	1|1	17	1	1|1	22	1	1|1	26	1
10	85388329	T	C	missense_variant	Btbd11	ENSMUSG00000020042	transcript	ENSMUST00000105307	protein_coding	c.1001T>C	p.Val334Ala	1|1	11	1	1|1	31	1	1|1	28	1	1|1	28	1
10	85647801	C	G	splice_region_variant&intron_variant	Btbd11	ENSMUSG00000020042	transcript	ENSMUST00000105307	protein_coding	c.2937+8C>G		0/1	15	0.27	0/1	37	0.22	0/1	22	0.23	0/1	20	0.55
10	85965238	G	C	missense_variant	Bpifc	ENSMUSG00000050108	transcript	ENSMUST00000061699	protein_coding	c.1245C>G	p.Ser415Arg	0/1	27	0.3	0/1	25	0.4	0/1	42	0.33	0/1	29	0.28
10	86467097	C	T	missense_variant	Syn3	ENSMUSG00000059602	transcript	ENSMUST00000120638	protein_coding	c.193G>A	p.Gly65Ser	1|1	15	1	1|1	40	1	1|1	26	1	1|1	32	1
10	86656805	G	T	missense_variant	Gm5174	ENSMUSG00000090308	transcript	ENSMUST00000171131	protein_coding	c.867G>T	p.Glu289Asp	1|1	23	1	1|1	18	1	1|1	26	1	1|1	38	1
10	86657372	A	C	missense_variant	Gm5174	ENSMUSG00000090308	transcript	ENSMUST00000171131	protein_coding	c.1434A>C	p.Lys478Asn	0/1	29	0.52	0/1	44	0.52	0/1	25	0.52	0/1	33	0.55
10	86866759	TGAGAGAGAGAGAGAGAGAGAGAGAGAGAGAGAGA	T	splice_region_variant&intron_variant	Stab2	ENSMUSG00000035459	transcript	ENSMUST00000035288	protein_coding	c.5572-36_5572-3delTCTCTCTCTCTCTCTCTCTCTCTCTCTCTCTCTC		1|1	10	1	1|1	23	1	1|1	13	1	1|1	15	1
10	87861285	C	A	5_prime_UTR_premature_start_codon_gain_variant	Igf1	ENSMUSG00000020053	transcript	ENSMUST00000062862	protein_coding	c.-86C>A		1|1	23	1	1|1	25	1	1|1	21	1	1|1	25	1
10	88114645	C	T	missense_variant	Parpbp	ENSMUSG00000035365	transcript	ENSMUST00000048518	protein_coding	c.872G>A	p.Ser291Asn	1|1	25	1	1|1	14	1	1|1	28	1	1|1	28	1
10	88133128	T	G	missense_variant	Parpbp	ENSMUSG00000035365	transcript	ENSMUST00000048518	protein_coding	c.455A>C	p.Glu152Ala	1|1	28	1	1|1	30	1	1|1	23	1	1|1	24	1
10	88133205	G	A	splice_region_variant&intron_variant	Parpbp	ENSMUSG00000035365	transcript	ENSMUST00000048518	protein_coding	c.385-7C>T		1|1	26	1	1|1	24	1	1|1	19	1	1|1	26	1
10	88148278	G	C	missense_variant	Nup37	ENSMUSG00000035351	transcript	ENSMUST00000052355	protein_coding	c.55G>C	p.Val19Leu	0/1	40	0.72	0/1	55	0.6	0/1	75	0.61	0/1	65	0.6
10	88174439	G	T	missense_variant	Nup37	ENSMUSG00000035351	transcript	ENSMUST00000052355	protein_coding	c.594G>T	p.Gln198His	0/1	41	0.39	0/1	43	0.47	0/1	52	0.58	0/1	65	0.57
10	88178152	G	A	missense_variant	Nup37	ENSMUSG00000035351	transcript	ENSMUST00000052355	protein_coding	c.886G>A	p.Val296Ile	0/1	50	0.46	0/1	34	0.53	0/1	54	0.37	0/1	52	0.4
10	88553289	C	CG	frameshift_variant	Mybpc1	ENSMUSG00000020061	transcript	ENSMUST00000119185	protein_coding	c.1215dupC	p.Gly406fs	0/1	23	0.26	0/1	17	0.47	0/1	40	0.25	0/1	29	0.21
10	88680550	G	A	5_prime_UTR_premature_start_codon_gain_variant	Spic	ENSMUSG00000004359	transcript	ENSMUST00000004473	protein_coding	c.-69C>T		1|1	16	1	1|1	27	1	1|1	30	1	1|1	36	1
10	88774971	AGAC	A	disruptive_inframe_deletion&splice_region_variant	Utp20	ENSMUSG00000004356	transcript	ENSMUST00000004470	protein_coding	c.4247_4249delGTC	p.Ser1416_Leu1417delinsMet	1|1	26	1	1|1	30	1	1|1	27	1	1|1	30	1
10	88778418	G	A	missense_variant	Utp20	ENSMUSG00000004356	transcript	ENSMUST00000004470	protein_coding	c.3673C>T	p.Pro1225Ser	1|1	21	1	1|1	23	1	1|1	25	1	1|1	21	1
10	88909700	T	C	splice_region_variant&intron_variant	Slc5a8	ENSMUSG00000020062	transcript	ENSMUST00000020255	protein_coding	c.1165+4T>C		1|1	21	1	1|1	15	1	1|1	20	1	1|1	35	1
10	88926259	C	A	missense_variant	Slc5a8	ENSMUSG00000020062	transcript	ENSMUST00000020255	protein_coding	c.1760C>A	p.Thr587Asn	1|1	24	1	1|1	35	1	1|1	33	1	1|1	28	1
10	89336403	C	T	splice_region_variant&non_coding_transcript_exon_variant	Ano4	ENSMUSG00000035189	transcript	ENSMUST00000180843	processed_transcript	n.141G>A		1|1	18	1	1|1	25	1	1|1	38	1	1|1	22	1
10	89480555	G	A	missense_variant	Nr1h4	ENSMUSG00000047638	transcript	ENSMUST00000105296	protein_coding	c.704C>T	p.Ala235Val	1|1	20	1	1|1	17	1	1|1	25	1	1|1	22	1
10	89480630	TGGGG	T	splice_region_variant&intron_variant	Nr1h4	ENSMUSG00000047638	transcript	ENSMUST00000105296	protein_coding	c.632-7_632-4delCCCC		1|1	18	1	1|1	13	1	1|1	16	1	1|1	17	1
10	89483407	T	C	missense_variant	Nr1h4	ENSMUSG00000047638	transcript	ENSMUST00000105296	protein_coding	c.596A>G	p.Lys199Arg	1|1	20	1	1|1	20	1	1|1	26	1	1|1	23	1
10	89506533	T	G	missense_variant	Nr1h4	ENSMUSG00000047638	transcript	ENSMUST00000105296	protein_coding	c.84A>C	p.Glu28Asp	1|1	17	1	1|1	32	1	1|1	18	1	1|1	28	1
10	89599795	G	A	5_prime_UTR_premature_start_codon_gain_variant	Slc17a8	ENSMUSG00000019935	transcript	ENSMUST00000105295	protein_coding	c.-284C>T		1|1	18	1	1|1	39	1	1|1	24	1	1|1	28	1
10	89667425	G	GT	splice_region_variant&non_coding_transcript_exon_variant	Scyl2	ENSMUSG00000069539	transcript	ENSMUST00000174575	retained_intron	n.2813dupA		1|1	10	1	1|1	16	1	1|1	11	1	1|1	27	1
10	89717207	A	G	missense_variant	Actr6	ENSMUSG00000019948	transcript	ENSMUST00000020109	protein_coding	c.788T>C	p.Phe263Ser	1|1	27	1	1|1	23	1	1|1	25	1	1|1	31	1
10	89805511	T	C	missense_variant	Uhrf1bp1l	ENSMUSG00000019951	transcript	ENSMUST00000020112	protein_coding	c.2543T>C	p.Ile848Thr	1|1	19	1	1|1	29	1	1|1	22	1	1|1	32	1
10	89805549	A	G	missense_variant	Uhrf1bp1l	ENSMUSG00000019951	transcript	ENSMUST00000020112	protein_coding	c.2581A>G	p.Ile861Val	1|1	25	1	1|1	35	1	1|1	18	1	1|1	31	1
10	89808612	G	C	missense_variant	Uhrf1bp1l	ENSMUSG00000019951	transcript	ENSMUST00000020112	protein_coding	c.3513G>C	p.Glu1171Asp	1|1	22	1	1|1	22	1	1|1	23	1	1|1	37	1
10	90033210	G	A	splice_region_variant&intron_variant	Anks1b	ENSMUSG00000058589	transcript	ENSMUST00000183156	protein_coding	c.135-4G>A		1|1	23	1	1|1	18	0.94	1|1	14	1	1|1	33	1
10	91000125	C	T	splice_region_variant&intron_variant	Apaf1	ENSMUSG00000019979	transcript	ENSMUST00000159457	processed_transcript	n.283+4G>A		1|1	31	1	1|1	23	1	1|1	21	1	1|1	46	1
10	91039777	C	CCA	splice_region_variant&intron_variant	Apaf1	ENSMUSG00000019979	transcript	ENSMUST00000020157	protein_coding	c.2178+6_2178+7dupTG		1|1	32	1	1|1	28	1	1|1	24	1	1|1	29	1
10	91060288	TG	T	splice_region_variant&intron_variant	Apaf1	ENSMUSG00000019979	transcript	ENSMUST00000020157	protein_coding	c.956-3delC		1|1	19	1	1|1	19	1	1|1	22	1	1|1	32	1
10	91062098	C	T	splice_region_variant&intron_variant	Apaf1	ENSMUSG00000019979	transcript	ENSMUST00000020157	protein_coding	c.823+6G>A		1|1	29	1	1|1	12	1	1|1	21	1	1|1	24	1
10	91082699	G	A	5_prime_UTR_premature_start_codon_gain_variant	Apaf1	ENSMUSG00000019979	transcript	ENSMUST00000020157	protein_coding	c.-624C>T		1|1	15	1	1|1	21	1	1|1	8	1	1|1	12	1
10	91083278	T	C	missense_variant	Ikbip	ENSMUSG00000019975	transcript	ENSMUST00000020149	protein_coding	c.152T>C	p.Met51Thr	1|1	25	1	1|1	15	1	1|1	18	1	1|1	31	1
10	91083747	G	T	splice_region_variant&intron_variant	Ikbip	ENSMUSG00000019975	transcript	ENSMUST00000128371	processed_transcript	n.192-8G>T		1|1	26	1	1|1	32	1	1|1	36	1	1|1	42	1
10	91095828	A	G	missense_variant	Ikbip	ENSMUSG00000019975	transcript	ENSMUST00000020149	protein_coding	c.333A>G	p.Ile111Met	1|1	36	1	1|1	40	1	1|1	27	1	1|1	30	1
10	91095986	T	G	missense_variant	Ikbip	ENSMUSG00000019975	transcript	ENSMUST00000020149	protein_coding	c.491T>G	p.Ile164Ser	1|1	25	1	1|1	36	1	1|1	28	1	1|1	33	1
10	91096507	C	A	missense_variant	Ikbip	ENSMUSG00000019975	transcript	ENSMUST00000020149	protein_coding	c.1012C>A	p.Leu338Met	1|1	19	1	1|1	16	1	1|1	28	1	1|1	42	1
10	91102056	G	A	missense_variant	Ikbip	ENSMUSG00000019975	transcript	ENSMUST00000020150	protein_coding	c.590G>A	p.Gly197Glu	1|1	27	1	1|1	23	1	1|1	30	1	1|1	34	1
10	91117121	ACACCTGGTTCAGAGAGGAGACATGAGTGCCCGAGCGCCACCTACCTCCCCACGCGCACAGTGAGCTGCTGTCTCAGGGGAGCCTGACT	A	splice_acceptor_variant&disruptive_inframe_deletion&splice_region_variant&intron_variant	Slc25a3	ENSMUSG00000061904	transcript	ENSMUST00000170810	protein_coding	c.916+4_919delAGTCAGGCTCCCCTGAGACAGCAGCTCACTGTGCGCGTGGGGAGGTAGGTGGCGCTCGGGCACTCATGTCTCCTCTCTGAACCAGGTG	p.Gly306del	0/1	62	0.37	0/1	56	0.23	0/1	56	0.39	0/1	90	0.41
10	92163904	T	C	splice_donor_variant&intron_variant	Gm26700	ENSMUSG00000097201	transcript	ENSMUST00000181480	lincRNA	n.1800+2T>C		1|1	18	1	1|1	23	1	1|1	20	1	1|1	22	1
10	92371719	T	C	splice_region_variant&intron_variant	Gm20757	ENSMUSG00000098040	transcript	ENSMUST00000182870	lincRNA	n.286+6A>G		1|1	26	1	1|1	17	1	1|1	34	1	1|1	38	1
10	92689629	T	C	splice_region_variant&intron_variant	Nedd1	ENSMUSG00000019988	transcript	ENSMUST00000020163	protein_coding	c.1811+6A>G		1|1	24	1	1|1	21	1	1|1	30	1	1|1	56	1
10	92691895	G	A	missense_variant	Nedd1	ENSMUSG00000019988	transcript	ENSMUST00000020163	protein_coding	c.1436C>T	p.Pro479Leu	1|1	30	1	1|1	22	1	1|1	15	1	1|1	38	1
10	92714196	T	TAAACAAAC	splice_region_variant&intron_variant	Nedd1	ENSMUSG00000019988	transcript	ENSMUST00000020163	protein_coding	c.232-14_232-7dupGTTTGTTT		1|1	15	1	1|1	14	1	1|1	26	1	1|1	32	1
10	92776199	T	C	missense_variant	Gm872	ENSMUSG00000020014	transcript	ENSMUST00000168110	protein_coding	c.9301A>G	p.Met3101Val	1|1	23	1	1|1	26	1	1|1	24	1	1|1	36	1
10	92868762	T	C	missense_variant	Gm872	ENSMUSG00000020014	transcript	ENSMUST00000168110	protein_coding	c.8260A>G	p.Thr2754Ala	1|1	26	1	1|1	20	1	1|1	39	1	1|1	45	1
10	92875034	T	TA	splice_region_variant&intron_variant	Gm872	ENSMUSG00000020014	transcript	ENSMUST00000168110	protein_coding	c.7971-3dupT		1|1	17	1	1|1	16	1	1|1	24	1	1|1	18	1
10	92957134	G	C	missense_variant&splice_region_variant	Gm872	ENSMUSG00000020014	transcript	ENSMUST00000168110	protein_coding	c.5116C>G	p.Pro1706Ala	1|1	25	1	1|1	37	1	1|1	34	1	1|1	40	1
10	92964642	G	A	missense_variant	Gm872	ENSMUSG00000020014	transcript	ENSMUST00000168110	protein_coding	c.4703C>T	p.Thr1568Ile	1|1	28	1	1|1	25	1	1|1	28	1	1|1	17	1
10	92979081	T	TA	splice_region_variant&intron_variant	Gm872	ENSMUSG00000020014	transcript	ENSMUST00000168110	protein_coding	c.3896-8dupT		1|1	29	1	1|1	32	1	1|1	26	1	1|1	33	1
10	92997395	G	A	splice_region_variant&intron_variant	Gm872	ENSMUSG00000020014	transcript	ENSMUST00000168110	protein_coding	c.3373-5C>T		1|1	16	1	1|1	20	1	1|1	21	1	1|1	33	1
10	93011417	A	G	splice_region_variant&intron_variant	Gm872	ENSMUSG00000020014	transcript	ENSMUST00000168110	protein_coding	c.2901+8T>C		1|1	20	1	1|1	22	1	1|1	26	1	1|1	39	1
10	93016430	G	C	splice_region_variant&intron_variant	Gm872	ENSMUSG00000020014	transcript	ENSMUST00000168110	protein_coding	c.2808+5C>G		1|1	19	1	1|1	22	1	1|1	26	1	1|1	38	1
10	93025132	A	C	missense_variant&splice_region_variant	Gm872	ENSMUSG00000020014	transcript	ENSMUST00000168110	protein_coding	c.2512T>G	p.Leu838Val	1|1	36	1	1|1	30	1	1|1	27	1	1|1	40	1
[truncated: 21,122 more rows]

## Sheet: different_varients
CHROM	POS	REF	ALT	CLASS	GENE	GENE_ID	FEATURE_TYPE	FEATURE_ID	TRANSCRIPT_BIOTYPE	DNA_CHANGE	AA_CHANGE	4T1_EV_DNA_1_GT	4T1_EV_DNA_1_DP	4T1_EV_DNA_1_AF	4T1_EV_DNA_2_GT	4T1_EV_DNA_2_DP	4T1_EV_DNA_2_AF	4T1_cell_genomic_DNA_1_GT	4T1_cell_genomic_DNA_1_DP	4T1_cell_genomic_DNA_1_AF	4T1_cell_genomic_DNA_2_GT	4T1_cell_genomic_DNA_2_DP	4T1_cell_genomic_DNA_2_AF
1	85246293	C	G	splice_region_variant&intron_variant	C130026I21Rik	ENSMUSG00000052477	transcript	ENSMUST00000159114	processed_transcript	n.101+4G>C		0/0	80	0	0/0	90	0	0/1	118	0.21	0/1	129	0.16
1	85577208	G	GAC	frameshift_variant	G530012D18Rik	ENSMUSG00000094127	transcript	ENSMUST00000178024	protein_coding	c.334_335insCA	p.Arg112fs	0|1	18	0.28	0|1	26	0.08	0/0	26	0	0/0	25	0
1	85610866	C	T	missense_variant	Sp140	ENSMUSG00000070031	transcript	ENSMUST00000080204	protein_coding	c.323C>T	p.Ala108Val	0/1	40	0.2	0/1	60	0.15	0/0	64	0	0/0	74	0
1	85630543	C	G	missense_variant	Sp140	ENSMUSG00000070031	transcript	ENSMUST00000080204	protein_coding	c.808C>G	p.His270Asp	0/1	27	0.11	0/1	30	0.2	0/0	19	0.11	0/0	38	0.05
1	136724786	A	C	splice_region_variant&intron_variant	Gm16880	ENSMUSG00000097448	transcript	ENSMUST00000181274	lincRNA	n.398-6A>C		0/0	15	0	0/0	11	0	0/1	27	0.3	0/1	26	0.42
1	164508187	C	CT	splice_region_variant&intron_variant	Gm26685	ENSMUSG00000097281	transcript	ENSMUST00000181831	lincRNA	n.239-4dupT		0/0	13	0	0/0	18	0	0/1	26	0.15	0/1	18	0.22
1	171515242	G	C	missense_variant	Gm9765	ENSMUSG00000038218	transcript	ENSMUST00000043170	protein_coding	c.10G>C	p.Glu4Gln	0/0	111	0	0/0	108	0	0|1	132	0.22	0|1	145	0.12
1	171515248	G	T	missense_variant	Gm9765	ENSMUSG00000038218	transcript	ENSMUST00000043170	protein_coding	c.16G>T	p.Ala6Ser	0/0	115	0	0/0	97	0	0|1	130	0.22	0|1	143	0.12
1	171573764	G	A	missense_variant	Cd244	ENSMUSG00000004709	transcript	ENSMUST00000004829	protein_coding	c.145G>A	p.Val49Ile	0/1	65	0.22	0/1	52	0.15	0/0	50	0	0/0	68	0
1	171573768	C	T	missense_variant	Cd244	ENSMUSG00000004709	transcript	ENSMUST00000004829	protein_coding	c.149C>T	p.Ser50Phe	0/0	63	0	0/0	52	0	0/1	59	0.24	0/1	70	0.3
1	171573811	TGA	T	frameshift_variant	Cd244	ENSMUSG00000004709	transcript	ENSMUST00000004829	protein_coding	c.195_196delGA	p.Glu65fs	0/1	68	0.16	0/1	68	0.21	0/0	80	0	0/0	95	0
1	171574171	T	C	missense_variant	Cd244	ENSMUSG00000004709	transcript	ENSMUST00000004829	protein_coding	c.464T>C	p.Leu155Ser	0/1	114	0.22	0/1	118	0.29	0/0	112	0	0/0	121	0
1	175975516	G	C	missense_variant	Pld5	ENSMUSG00000055214	transcript	ENSMUST00000065967	protein_coding	c.1182C>G	p.Asn394Lys	0/0	6	0	0/0	14	0	0/1	25	0.36	0/1	35	0.37
1	181123985	C	CACAGCCTGGTCAAA	splice_acceptor_variant&intron_variant	Nvl	ENSMUSG00000026516	transcript	ENSMUST00000027797	protein_coding	c.1060-2_1060-1insTTTGACCAGGCTGT		0/0	43	0	0/0	26	0	0|1	46	0.28	0|1	37	0.32
1	181123987	A	AACTCACGGAGCTTCTGCTCAGACTCTCCAGAAACTCCGGACACAATCTCTG	splice_region_variant&intron_variant	Nvl	ENSMUSG00000026516	transcript	ENSMUST00000027797	protein_coding	c.1060-4_1060-3insCAGAGATTGTGTCCGGAGTTTCTGGAGAGTCTGAGCAGAAGCTCCGTGAGT		0/0	38	0	0/0	26	0	0|1	46	0.28	0|1	37	0.32
1	184795309	G	GAC	splice_region_variant&intron_variant	2025-03-01	ENSMUSG00000026621	transcript	ENSMUST00000110992	protein_coding	c.831-6_831-5dupGT		1|1	25	1	1|1	20	1	0/1	22	0.86	0/1	22	0.91
10	51494179	G	A	splice_donor_variant&intron_variant	Lilrb4	ENSMUSG00000062593	transcript	ENSMUST00000078778	protein_coding	c.811+1G>A		0/1	22	0.32	0/1	24	0.29	0/0	14	0	0/0	37	0.14
10	51628558	GA	G	splice_region_variant&intron_variant	Gprc6a	ENSMUSG00000019905	transcript	ENSMUST00000020062	protein_coding	c.195-7delT		0/0	19	0.12	0/0	18	0.11	0/1	27	0.25	0/1	27	0.33
10	58224626	C	A	missense_variant	AW822073	ENSMUSG00000058537	transcript	ENSMUST00000174056	protein_coding	c.305G>T	p.Arg102Leu	1|1	344	0.91	1|1	561	0.91	0|1	325	0.86	0/1	463	0.89
10	63340914	TA	T	splice_region_variant&intron_variant	Sirt1	ENSMUSG00000020063	transcript	ENSMUST00000120239	protein_coding	c.-217-3delT		0/1	18	0.22	0/1	16	0.14	0/0	21	0	0/0	30	0
10	109714242	C	G	missense_variant	Nav3	ENSMUSG00000020181	transcript	ENSMUST00000032719	protein_coding	c.5626G>C	p.Val1876Leu	0/0	17	0	0/0	12	0	0/1	13	0.23	0/1	29	0.21
10	127064452	CGGTGAGAAGGTTGGATTGGGAGTGGGGCGGAGAGGACAATAGGACCCGTAAGGCAGGAGTGGGACCCTAGAACGCCAGAGGCCACGTTGAGACAAAGGGGACGACTAGCTGGTGATCATTTGTTCTTCTCA	C	frameshift_variant&splice_acceptor_variant&splice_donor_variant&splice_region_variant&intron_variant	Cdk4	ENSMUSG00000006728	transcript	ENSMUST00000006911	protein_coding	c.218+2_219del	p.Leu74fs	0/0	33	0	0/0	40	0	0/1	47	0.21	0/1	66	0.33
11	5964521	CCT	C	splice_region_variant&intron_variant	Ykt6	ENSMUSG00000002741	transcript	ENSMUST00000002818	protein_coding	c.460-9_460-8delCT		0/0	24	0	0/0	33	0	0/1	21	0.24	0/1	28	0.36
11	32031783	A	T	missense_variant	Nsg2	ENSMUSG00000020297	transcript	ENSMUST00000093219	protein_coding	c.227A>T	p.Lys76Ile	0/0	17	0.12	0/0	20	0	0/1	14	0.14	0/1	24	0.21
11	58552114	C	T	missense_variant	Olfr328	ENSMUSG00000057654	transcript	ENSMUST00000073933	protein_coding	c.124G>A	p.Ala42Thr	1|1	22	0.95	1|1	29	0.93	0/1	30	0.73	0/1	31	0.87
11	59128180	T	C	missense_variant	Obscn	ENSMUSG00000061462	transcript	ENSMUST00000047441	protein_coding	c.2731A>G	p.Met911Val	0|1	18	0.33	0|1	18	0.33	0/0	13	0	0/0	15	0
11	71217911	C	CAT	frameshift_variant	Nlrp1b	ENSMUSG00000070390	transcript	ENSMUST00000108516	protein_coding	c.762_763insAT	p.Ala255fs	1|1	8	1	1|1	10	1	0/1	8	0.5	0|1	12	0.83
11	86257419	C	CA	splice_region_variant&intron_variant	Ints2	ENSMUSG00000018068	transcript	ENSMUST00000132024	protein_coding	c.-223-5dupT		0/0	9	0	0/0	12	0	0/1	10	0.4	0/1	20	0.25
11	99851042	GCAGCTGGGGCGGCAAGTGGTCTGGCAGCAGACTGGGCGGCAGCAGCTGGACACTCCA	G	disruptive_inframe_deletion	Krtap4-16	ENSMUSG00000046474	transcript	ENSMUST00000107437	protein_coding	c.474_530delTGGAGTGTCCAGCTGCTGCCGCCCAGTCTGCTGCCAGACCACTTGCCGCCCCAGCTG	p.Gly159_Cys177del	0/0	16	0	0/0	11	0	1|1	9	1	1|1	18	1
12	30094969	G	C	missense_variant	Tpo	ENSMUSG00000020673	transcript	ENSMUST00000021005	protein_coding	c.1780C>G	p.Pro594Ala	0/0	21	0	0/0	37	0	0/1	28	0.11	0/1	24	0.21
12	32826013	T	A	splice_region_variant&intron_variant	Gdap10	ENSMUSG00000096954	transcript	ENSMUST00000180613	lincRNA	n.4117-5T>A		1|1	18	1	1|1	7	1	0|1	16	0.88	0/1	17	0.71
12	40036667	C	T	missense_variant	Arl4a	ENSMUSG00000047446	transcript	ENSMUST00000101472	protein_coding	c.80G>A	p.Gly27Asp	0/0	23	0.04	0/0	29	0.07	0/1	33	0.21	0/1	69	0.42
12	40036682	T	G	missense_variant	Arl4a	ENSMUSG00000047446	transcript	ENSMUST00000101472	protein_coding	c.65A>C	p.His22Pro	0/0	21	0	0/0	29	0.03	0/1	32	0.12	0/1	59	0.47
12	113597446	T	C	splice_region_variant&synonymous_variant	Ighv5-4	ENSMUSG00000095612	transcript	ENSMUST00000103444	protein_coding	c.353A>G	p.???118???	0|1	17	0.24	0|1	17	0.24	0/0	20	0	0/0	34	0
12	113702262	T	C	missense_variant	Ighv5-12	ENSMUSG00000095429	transcript	ENSMUST00000103450	protein_coding	c.215A>G	p.Asn72Ser	0/1	63	0.17	0/1	56	0.25	0/0	52	0.12	0/0	74	0
12	113948521	T	A	missense_variant	Ighv4-1	ENSMUSG00000076655	transcript	ENSMUST00000103464	protein_coding	c.111A>T	p.Lys37Asn	1|1	5	1	1|1	3	1	0/1	5	0.8	0/1	13	0.85
12	114109106	G	C	missense_variant	Ighv9-2	ENSMUSG00000094102	transcript	ENSMUST00000103472	protein_coding	c.246C>G	p.Asp82Glu	0/0	18	0	0/0	13	0	0/1	12	0.17	0/1	11	0.27
12	114153288	C	T	missense_variant	Ighv7-3	ENSMUSG00000076652	transcript	ENSMUST00000103461	protein_coding	c.253G>A	p.Val85Met	0/0	15	0	0/0	18	0	0/1	24	0.17	0/1	39	0.23
12	114153308	G	A	missense_variant	Ighv7-3	ENSMUSG00000076652	transcript	ENSMUST00000103461	protein_coding	c.233C>T	p.Thr78Ile	0/0	20	0	0/0	18	0	0/1	25	0.16	0/1	44	0.2
12	114153334	A	C	missense_variant	Ighv7-3	ENSMUSG00000076652	transcript	ENSMUST00000103461	protein_coding	c.207T>G	p.Phe69Leu	0|0	20	0.05	0|0	21	0	0|1	23	0.17	0|1	45	0.24
12	114153338	C	G	missense_variant	Ighv7-3	ENSMUSG00000076652	transcript	ENSMUST00000103461	protein_coding	c.203G>C	p.Gly68Ala	0|0	21	0.05	0/0	19	0	0|1	22	0.18	0|1	45	0.24
12	114153344	C	T	stop_gained	Ighv7-3	ENSMUSG00000076652	transcript	ENSMUST00000103461	protein_coding	c.197G>A	p.Trp66*	0|0	21	0.05	0/0	19	0	0|1	22	0.23	0|1	44	0.25
12	114513595	A	T	missense_variant	Ighv1-5	ENSMUSG00000096499	transcript	ENSMUST00000103494	protein_coding	c.29T>A	p.Val10Glu	0/0	49	0	0/0	37	0	0|1	90	0.21	0|1	53	0.23
12	114513599	T	C	missense_variant	Ighv1-5	ENSMUSG00000096499	transcript	ENSMUST00000103494	protein_coding	c.25A>G	p.Thr9Ala	0/0	49	0	0/0	37	0	0|1	90	0.22	0|1	54	0.22
12	114513623	C	G	missense_variant	Ighv1-5	ENSMUSG00000096499	transcript	ENSMUST00000103494	protein_coding	c.1G>C	p.Glu1Gln	0/0	49	0	0/0	37	0	0|1	87	0.25	0|1	58	0.31
12	114538587	C	T	missense_variant	Ighv1-7	ENSMUSG00000095200	transcript	ENSMUST00000103496	protein_coding	c.259G>A	p.Ala87Thr	0/1	12	0.25	0/1	16	0.12	0/0	13	0	0/0	13	0.08
12	114583679	C	G	missense_variant	Ighv1-9	ENSMUSG00000094694	transcript	ENSMUST00000103498	protein_coding	c.238G>C	p.Glu80Gln	0|0	30	0.07	0|0	19	0.05	0|1	37	0.14	0|1	24	0.21
12	114851381	G	T	missense_variant	Ighv1-34	ENSMUSG00000093955	transcript	ENSMUST00000103512	protein_coding	c.160C>A	p.His54Asn	0|1	25	0.08	0/1	12	0.25	0/0	22	0	0/0	30	0.07
12	114896659	A	G	missense_variant	Ighv1-37	ENSMUSG00000095923	transcript	ENSMUST00000103514	protein_coding	c.13T>C	p.Trp5Arg	0/0	32	0.09	0/0	28	0	0|1	24	0.21	0|1	48	0.08
12	115158499	G	T	missense_variant	Ighv1-53	ENSMUSG00000093894	transcript	ENSMUST00000103523	protein_coding	c.255C>A	p.Ser85Arg	0/0	110	0	0/0	86	0	0/1	93	0.2	0/1	145	0.24
12	115158528	C	G	missense_variant	Ighv1-53	ENSMUSG00000093894	transcript	ENSMUST00000103523	protein_coding	c.226G>C	p.Gly76Arg	0|1	89	0.12	0|1	86	0.27	0/0	104	0	0/0	160	0
12	115461004	C	T	missense_variant	Ighv1-62-3	ENSMUSG00000096767	transcript	ENSMUST00000103532	protein_coding	c.346G>A	p.Ala116Thr	0/1	30	0.87	0/1	37	0.57	1|1	38	1	1|1	48	0.98
12	115461061	T	A	missense_variant	Ighv1-62-3	ENSMUSG00000096767	transcript	ENSMUST00000103532	protein_coding	c.289A>T	p.Thr97Ser	0/0	20	0	0/0	15	0	0|1	20	0.25	0|1	33	0.15
12	115567347	C	T	missense_variant	Ighv8-11	ENSMUSG00000095170	transcript	ENSMUST00000103536	protein_coding	c.154G>A	p.Gly52Ser	0/0	17	0	0/0	18	0.11	0/1	15	0.27	0/1	23	0.09
12	115802736	G	A	missense_variant	Gm16710	ENSMUSG00000094124	transcript	ENSMUST00000103543	protein_coding	c.260C>T	p.Thr87Ile	0/1	28	0.29	0/1	23	0.17	0/0	27	0	0/0	37	0
12	115802817	C	T	missense_variant	Gm16710	ENSMUSG00000094124	transcript	ENSMUST00000103543	protein_coding	c.179G>A	p.Gly60Asp	0/1	28	0.25	0/1	35	0.26	0/0	30	0.03	0/0	43	0
12	115834059	T	A	missense_variant	Ighv1-75	ENSMUSG00000096020	transcript	ENSMUST00000103544	protein_coding	c.242A>T	p.Glu81Val	0/0	9	0	0/0	4	0	0/1	12	0.33	0/1	20	0.15
12	115861997	C	T	missense_variant	Ighv1-77	ENSMUSG00000096452	transcript	ENSMUST00000170551	protein_coding	c.164G>A	p.Ser55Asn	0/0	17	0	0/0	8	0	0/1	19	0.16	0/1	36	0.31
12	115861998	T	C	missense_variant	Ighv1-77	ENSMUSG00000096452	transcript	ENSMUST00000170551	protein_coding	c.163A>G	p.Ser55Gly	0/0	12	0	0/0	8	0	0/1	20	0.15	0/1	36	0.28
12	115868890	C	A	missense_variant	Ighv1-78	ENSMUSG00000096326	transcript	ENSMUST00000163670	protein_coding	c.177G>T	p.Lys59Asn	0/1	50	0.23	0/1	41	0.12	0/0	51	0.06	0/0	78	0
12	115868907	T	C	missense_variant	Ighv1-78	ENSMUSG00000096326	transcript	ENSMUST00000163670	protein_coding	c.160A>G	p.Arg54Gly	0/1	57	0.81	0/1	43	0.88	1|1	59	0.95	1|1	83	0.94
12	115920403	T	C	missense_variant	Ighv1-81	ENSMUSG00000094689	transcript	ENSMUST00000103548	protein_coding	c.227A>G	p.Asn76Ser	1|1	15	1	1|1	14	1	0/1	15	0.8	0/1	14	0.86
13	3361132	C	T	missense_variant	Gm16505	ENSMUSG00000096107	transcript	ENSMUST00000179981	protein_coding	c.104C>T	p.Pro35Leu	0|1	17	0.12	0|1	17	0.41	0|0	14	0	0/0	26	0
13	3361143	C	G	missense_variant	Gm16505	ENSMUSG00000096107	transcript	ENSMUST00000179981	protein_coding	c.115C>G	p.Pro39Ala	0|1	19	0.11	0|1	15	0.47	0|0	12	0	0/0	27	0
13	3361147	A	T	missense_variant	Gm16505	ENSMUSG00000096107	transcript	ENSMUST00000179981	protein_coding	c.119A>T	p.Glu40Val	0/1	18	0.12	0/1	15	0.47	0/0	11	0	0/0	27	0
13	3361224	T	C	missense_variant	Gm16505	ENSMUSG00000096107	transcript	ENSMUST00000179981	protein_coding	c.196T>C	p.Tyr66His	0|1	17	0.12	0/1	12	0.25	0/0	10	0	0/0	19	0
13	61568155	G	T	missense_variant	Cts3	ENSMUSG00000074870	transcript	ENSMUST00000054702	protein_coding	c.296C>A	p.Thr99Asn	1|1	19	1	1|1	18	0.94	0/1	31	0.77	0/1	29	0.52
13	61568179	T	A	missense_variant	Cts3	ENSMUSG00000074870	transcript	ENSMUST00000054702	protein_coding	c.272A>T	p.Glu91Val	0/0	20	0	0/0	15	0	0/1	28	0.14	0/1	25	0.32
13	62171418	T	A	missense_variant	Zfp808	ENSMUSG00000074867	transcript	ENSMUST00000099449	protein_coding	c.460T>A	p.Phe154Ile	0/0	18	0	0/0	19	0	0|1	29	0.21	0|1	28	0.11
13	66852492	ACCACATTGATTACATTCATAAGGTTTCTCTCCAGTATGGCTTCTTTTATGACATTGGAGATCAGCGGGTCTTACAAAGG	A	frameshift_variant&splice_acceptor_variant&splice_region_variant&intron_variant	Gm10323	ENSMUSG00000071295	transcript	ENSMUST00000079229	protein_coding	c.462+35_488delCCTTTGTAAGACCCGCTGATCTCCAATGTCATAAAAGAAGCCATACTGGAGAGAAACCTTATGAATGTAATCAATGTGG	p.Lys155fs	0/0	33	0	0/0	31	0	0|1	51	0.88	0|1	58	0.86
13	66852814	G	T	missense_variant	Gm10323	ENSMUSG00000071295	transcript	ENSMUST00000079229	protein_coding	c.254C>A	p.Ser85Tyr	0/0	11	0	0/0	15	0	0/1	13	0.15	0/1	11	0.27
13	67198639	T	A	missense_variant	Zfp455	ENSMUSG00000051037	transcript	ENSMUST00000120861	protein_coding	c.113T>A	p.Phe38Tyr	0/0	11	0	0/0	16	0	0/1	17	0.18	0/1	24	0.38
13	89094531	C	CT	splice_region_variant&intron_variant	Edil3	ENSMUSG00000034488	transcript	ENSMUST00000081769	protein_coding	c.356-7dupT		1|1	11	1	1|1	11	1	0/1	10	0.75	0/1	15	0.85
14	14407259	C	G	missense_variant	Olfr721-ps1	ENSMUSG00000091809	transcript	ENSMUST00000165291	protein_coding	c.36C>G	p.Asp12Glu	0|0	19	0.11	0/0	15	0.13	0/1	21	0.33	0/1	25	0.35
14	26772510	GT	G	splice_region_variant&intron_variant	Dnah12	ENSMUSG00000021879	transcript	ENSMUST00000022433	protein_coding	c.3787-8delT		0/1	13	0.36	0/1	8	0.25	0/0	18	0	0/0	17	0
14	44501197	A	G	missense_variant	BC061237	ENSMUSG00000072145	transcript	ENSMUST00000096899	protein_coding	c.52A>G	p.Ile18Val	0/1	13	0.31	0/1	15	0.2	0/0	29	0	0/0	23	0
14	50736578	C	T	missense_variant	Olfr749	ENSMUSG00000059069	transcript	ENSMUST00000074674	protein_coding	c.583G>A	p.Glu195Lys	0/0	17	0	0|0	16	0.06	0|1	14	0.14	0|1	29	0.21
14	51413201	A	G	missense_variant	Vmn2r88	ENSMUSG00000000606	transcript	ENSMUST00000022438	protein_coding	c.370A>G	p.Asn124Asp	0|1	15	0.2	0|1	21	0.1	0/0	15	0	0|0	29	0.03
14	51413208	A	G	missense_variant	Vmn2r88	ENSMUSG00000000606	transcript	ENSMUST00000022438	protein_coding	c.377A>G	p.His126Arg	0/1	16	0.81	0/1	20	0.9	1|1	15	1	1|1	30	0.97
14	53559986	A	G	missense_variant	Trav15-1-dv6-1	ENSMUSG00000094016	transcript	ENSMUST00000103653	protein_coding	c.88A>G	p.Thr30Ala	0/1	24	0.08	0/1	17	0.29	0/0	25	0	0/0	45	0.04
14	53598924	G	T	missense_variant	Trav4-3	ENSMUSG00000093966	transcript	ENSMUST00000103655	protein_coding	c.17G>T	p.Gly6Val	1|1	18	1	1|1	17	1	0|1	20	0.9	0|1	39	0.87
14	76237109	G	GC	frameshift_variant	Rps2-ps6	ENSMUSG00000095427	transcript	ENSMUST00000095471	protein_coding	c.244dupG	p.Ala82fs	0/1	23	0.13	0/1	30	0.2	0/0	16	0	0/0	25	0.08
15	10978586	G	C	missense_variant	C1qtnf3	ENSMUSG00000058914	transcript	ENSMUST00000110523	protein_coding	c.871G>C	p.Val291Leu	0|1	21	0.38	0/1	30	0.32	0/0	37	0.16	0/0	50	0.17
15	82454409	A	T	missense_variant	Cyp2d9	ENSMUSG00000068086	transcript	ENSMUST00000089129	protein_coding	c.643A>T	p.Ser215Cys	0/0	34	0	0/0	26	0	0|1	44	0.07	0|1	30	0.2
15	88781898	A	G	missense_variant	Zbed4	ENSMUSG00000034333	transcript	ENSMUST00000041297	protein_coding	c.2168A>G	p.Glu723Gly	0/1	31	0.19	0/1	30	0.2	0/0	26	0	0/0	35	0.09
15	98647990	CT	C	splice_region_variant&non_coding_transcript_exon_variant	Ddx23	ENSMUSG00000003360	transcript	ENSMUST00000160506	retained_intron	n.3093delA		0/1	15	0.2	0/1	14	0.14	0/0	33	0	0/0	29	0.07
16	23224446	TA	T	splice_region_variant&intron_variant	BC106179	ENSMUSG00000045231	transcript	ENSMUST00000055369	protein_coding	c.1-3delT		0/1	20	0.22	0/1	21	0.14	0/0	17	0.14	0/0	16	0
16	32752825	C	T	missense_variant	Muc4	ENSMUSG00000079620	transcript	ENSMUST00000096106	protein_coding	c.2702C>T	p.Thr901Ile	1|1	10	1	1|1	23	0.96	0/1	14	0.71	0/1	20	0.8
16	32752834	G	T	missense_variant	Muc4	ENSMUSG00000079620	transcript	ENSMUST00000096106	protein_coding	c.2711G>T	p.Gly904Val	0/0	8	0	0|0	20	0.05	0|1	14	0.21	0|1	20	0.2
16	32753871	C	T	missense_variant	Muc4	ENSMUSG00000079620	transcript	ENSMUST00000096106	protein_coding	c.3746C>T	p.Thr1249Ile	0/0	21	0	0/0	39	0	0|1	36	0.14	0|1	45	0.24
16	32753895	C	T	missense_variant	Muc4	ENSMUSG00000079620	transcript	ENSMUST00000096106	protein_coding	c.3770C>T	p.Thr1257Ile	0/0	25	0	0/0	41	0	0|1	31	0.16	0|1	52	0.29
17	22618582	A	G	missense_variant	Vmn2r112	ENSMUSG00000094921	transcript	ENSMUST00000097381	protein_coding	c.2023A>G	p.Thr675Ala	0|1	20	0.2	0|1	21	0.14	0/0	34	0	0/0	30	0
17	22618583	C	T	missense_variant	Vmn2r112	ENSMUSG00000094921	transcript	ENSMUST00000097381	protein_coding	c.2024C>T	p.Thr675Ile	0|1	20	0.2	0|1	21	0.14	0/0	34	0	0/0	30	0
17	23311125	T	C	missense_variant	Vmn2r114	ENSMUSG00000091945	transcript	ENSMUST00000168033	protein_coding	c.307A>G	p.Lys103Glu	0/0	26	0	0/0	24	0	0|1	94	0.7	0|1	136	0.8
17	23311190	GA	G	frameshift_variant	Vmn2r114	ENSMUSG00000091945	transcript	ENSMUST00000168033	protein_coding	c.241delT	p.Ser81fs	0/0	67	0	0/0	13	0	0|1	78	0.67	0|1	109	0.69
17	23401726	CTTT	C	disruptive_inframe_deletion	Vmn2r116	ENSMUSG00000090966	transcript	ENSMUST00000164856	protein_coding	c.2435_2437delTTT	p.Phe812del	0|1	33	0.21	0|1	29	0.14	0/0	21	0	0/0	19	0
17	23401742	T	A	missense_variant	Vmn2r116	ENSMUSG00000090966	transcript	ENSMUST00000164856	protein_coding	c.2449T>A	p.Ser817Thr	0|1	28	0.21	0|1	28	0.14	0/0	21	0	0/0	20	0
17	23401749	CA	C	frameshift_variant	Vmn2r116	ENSMUSG00000090966	transcript	ENSMUST00000164856	protein_coding	c.2457delA	p.Met821fs	0/1	23	0.87	0/1	30	0.87	1|1	23	1	1|1	21	1
17	23460165	G	C	stop_gained	Vmn2r117	ENSMUSG00000091407	transcript	ENSMUST00000171996	protein_coding	c.2084C>G	p.Ser695*	0/1	22	0.23	0/1	18	0.17	0/0	30	0	0/0	30	0.1
17	23471212	T	C	missense_variant	Vmn2r117	ENSMUSG00000091407	transcript	ENSMUST00000171996	protein_coding	c.1619A>G	p.Lys540Arg	0/1	55	0.11	0/1	50	0.36	0/0	33	0	0/0	43	0
17	33961607	C	T	splice_region_variant&intron_variant	Vps52	ENSMUSG00000024319	transcript	ENSMUST00000025178	protein_coding	c.1126-6C>T		0|1	14	0.21	0|1	49	0.14	0/0	15	0	0/0	35	0
17	33961609	G	T	splice_region_variant&intron_variant	Vps52	ENSMUSG00000024319	transcript	ENSMUST00000025178	protein_coding	c.1126-4G>T		0|1	14	0.21	0|1	51	0.14	0/0	17	0	0/0	35	0
17	33961622	G	A	missense_variant	Vps52	ENSMUSG00000024319	transcript	ENSMUST00000025178	protein_coding	c.1135G>A	p.Glu379Lys	0|1	15	0.2	0|1	54	0.15	0/0	16	0	0/0	37	0
17	33961634	C	T	missense_variant	Vps52	ENSMUSG00000024319	transcript	ENSMUST00000025178	protein_coding	c.1147C>T	p.Arg383Cys	0|1	18	0.22	0|1	56	0.2	0/0	19	0	0/0	35	0
17	33962137	T	C	missense_variant	Vps52	ENSMUSG00000024319	transcript	ENSMUST00000025178	protein_coding	c.1352T>C	p.Leu451Pro	0|0	31	0.03	0/0	28	0	0|1	27	0.22	0|1	28	0.25
17	33962146	G	A	missense_variant	Vps52	ENSMUSG00000024319	transcript	ENSMUST00000025178	protein_coding	c.1361G>A	p.Arg454His	0|0	29	0.03	0/0	26	0	0|1	27	0.15	0|1	27	0.26
17	33962151	A	C	missense_variant	Vps52	ENSMUSG00000024319	transcript	ENSMUST00000025178	protein_coding	c.1366A>C	p.Ile456Leu	0|0	28	0.04	0/0	26	0	0|1	26	0.12	0|1	27	0.26
17	34000061	G	A	missense_variant&splice_region_variant	H2-K1	ENSMUSG00000061232	transcript	ENSMUST00000173075	protein_coding	c.67C>T	p.Arg23Cys	0|1	20	0.45	0|1	32	0.19	0/0	29	0	0|0	20	0
17	34000065	T	C	splice_acceptor_variant&intron_variant	H2-K1	ENSMUSG00000061232	transcript	ENSMUST00000173075	protein_coding	c.65-2A>G		0|1	20	0.45	0|1	32	0.19	0/0	29	0	0|0	21	0
17	34000067	A	G	splice_region_variant&intron_variant	H2-K1	ENSMUSG00000061232	transcript	ENSMUST00000173075	protein_coding	c.65-4T>C		0|1	20	0.45	0|1	33	0.18	0/0	29	0	0|0	21	0
17	34021751	G	GAAGTATGTTAAATGGTGCAC	frameshift_variant	Ring1	ENSMUSG00000024325	transcript	ENSMUST00000025183	protein_coding	c.1050_1051insGTGCACCATTTAACATACTT	p.Pro351fs	0|1	37	0.08	0|1	32	0.25	0/0	13	0	0/0	50	0
17	35263390	A	C	missense_variant	H2-D1	ENSMUSG00000073411	transcript	ENSMUST00000172785	protein_coding	c.85A>C	p.Met29Leu	0/0	34	0	0/0	49	0	0/1	31	0.26	0/1	49	0.1
17	35263863	C	A	missense_variant	H2-D1	ENSMUSG00000073411	transcript	ENSMUST00000172785	protein_coding	c.368C>A	p.Ser123Tyr	1|1	31	0.94	1|1	41	0.98	0/1	38	0.71	0/1	38	0.84
17	35323300	T	G	missense_variant	H2-Q1	ENSMUSG00000079507	transcript	ENSMUST00000073208	protein_coding	c.847T>G	p.Tyr283Asp	0|1	28	0.25	0|1	47	0.15	0/0	31	0	0/0	44	0
17	35323302	C	A	stop_gained	H2-Q1	ENSMUSG00000079507	transcript	ENSMUST00000073208	protein_coding	c.849C>A	p.Tyr283*	0|1	28	0.25	0|1	47	0.15	0/0	33	0	0/0	44	0
17	35345223	A	G	missense_variant	H2-Q2	ENSMUSG00000091705	transcript	ENSMUST00000074806	protein_coding	c.952A>G	p.Ile318Val	0/0	23	0	0|0	8	0	0|1	10	0.4	0|1	11	0.27
17	35345230	T	A	missense_variant	H2-Q2	ENSMUSG00000091705	transcript	ENSMUST00000074806	protein_coding	c.959T>A	p.Ile320Asn	0/0	24	0	0|0	10	0	0|1	11	0.36	0|1	13	0.15
17	35345233	G	T	missense_variant	H2-Q2	ENSMUSG00000091705	transcript	ENSMUST00000074806	protein_coding	c.962G>T	p.Gly321Val	0/0	24	0	0|0	11	0	0|1	12	0.33	0|1	13	0.15
17	35425229	A	T	missense_variant	H2-Q6	ENSMUSG00000073409	transcript	ENSMUST00000113879	protein_coding	c.186A>T	p.Glu62Asp	0/0	19	0	0|0	30	0.07	0|1	13	0.23	0|1	35	0.11
17	35425239	A	T	missense_variant	H2-Q6	ENSMUSG00000073409	transcript	ENSMUST00000113879	protein_coding	c.196A>T	p.Met66Leu	0/0	19	0	0|0	30	0.07	0|1	13	0.23	0|1	37	0.11
17	35425241	G	T	missense_variant	H2-Q6	ENSMUSG00000073409	transcript	ENSMUST00000113879	protein_coding	c.198G>T	p.Met66Ile	0/0	19	0	0|0	30	0.07	0|1	13	0.23	0|1	37	0.11
17	35442981	G	T	missense_variant	H2-Q7	ENSMUSG00000060550	transcript	ENSMUST00000078205	protein_coding	c.910G>T	p.Asp304Tyr	0/0	6	0	0/0	19	0	0|1	15	0.2	0|1	17	0.24
17	35442985	G	A	missense_variant	H2-Q7	ENSMUSG00000060550	transcript	ENSMUST00000078205	protein_coding	c.914G>A	p.Cys305Tyr	0/0	7	0	0/0	20	0	0|1	15	0.2	0|1	17	0.24
17	35442999	G	C	missense_variant&splice_region_variant	H2-Q7	ENSMUSG00000060550	transcript	ENSMUST00000078205	protein_coding	c.928G>C	p.Ala310Pro	0/0	13	0	0/0	24	0	0|1	14	0.21	0|1	18	0.17
17	35443000	G	C	splice_donor_variant&intron_variant	H2-Q7	ENSMUSG00000060550	transcript	ENSMUST00000071951	protein_coding	c.*40+1G>C		0/0	13	0	0/0	24	0	0|1	14	0.21	0|1	18	0.17
17	35470966	G	A	missense_variant	H2-Q10	ENSMUSG00000067235	transcript	ENSMUST00000068291	protein_coding	c.484G>A	p.Val162Met	0/1	25	0.16	0|1	45	0.2	0/0	18	0	0|0	21	0
17	35470967	T	C	missense_variant	H2-Q10	ENSMUSG00000067235	transcript	ENSMUST00000068291	protein_coding	c.485T>C	p.Val162Ala	0/1	25	0.12	0|1	45	0.2	0/0	18	0	0|0	21	0
17	35471087	C	T	missense_variant	H2-Q10	ENSMUSG00000067235	transcript	ENSMUST00000068291	protein_coding	c.605C>T	p.Thr202Met	0/0	28	0	0/0	44	0	0/1	24	0.25	0/1	27	0.11
17	36110139	A	G	splice_region_variant&intron_variant	C920025E04Rik	ENSMUSG00000073405	transcript	ENSMUST00000172538	unprocessed_pseudogene	n.609-4T>C		0|0	16	0.06	0/0	21	0	0|1	22	0.14	0|1	27	0.22
17	36165832	T	C	missense_variant	Gm8909	ENSMUSG00000073402	transcript	ENSMUST00000173353	protein_coding	c.749A>G	p.Asp250Gly	0/0	21	0	0/0	42	0	0|1	26	0.23	0|1	48	0.23
17	36165835	T	G	missense_variant	Gm8909	ENSMUSG00000073402	transcript	ENSMUST00000173353	protein_coding	c.746A>C	p.Glu249Ala	0/0	21	0	0/0	41	0	0|1	26	0.23	0|1	51	0.24
17	36165862	A	G	missense_variant	Gm8909	ENSMUSG00000073402	transcript	ENSMUST00000173353	protein_coding	c.719T>C	p.Val240Ala	0/0	24	0	0/0	31	0	0|1	28	0.32	0|1	56	0.27
17	36165863	C	T	missense_variant	Gm8909	ENSMUSG00000073402	transcript	ENSMUST00000173353	protein_coding	c.718G>A	p.Val240Ile	0/0	24	0	0/0	32	0	0|1	28	0.32	0|1	56	0.27
17	37300250	C	A	missense_variant	Olfr101	ENSMUSG00000092077	transcript	ENSMUST00000058046	protein_coding	c.171G>T	p.Met57Ile	0/1	21	0.9	0/1	25	0.84	1|1	16	1	1|1	27	0.96
17	37575341	C	A	missense_variant	Olfr113	ENSMUSG00000092292	transcript	ENSMUST00000174139	protein_coding	c.81G>T	p.Gln27His	1|1	6	1	1|1	14	1	0|1	8	0.88	0|1	21	0.9
17	45568520	C	T	missense_variant	Hsp90ab1	ENSMUSG00000023944	transcript	ENSMUST00000024739	protein_coding	c.1774G>A	p.Val592Met	0|1	19	0.26	0|1	58	0.09	0/0	34	0	0/0	51	0
17	75348894	TC	T	frameshift_variant	Ltbp1	ENSMUSG00000001870	transcript	ENSMUST00000135447	protein_coding	c.2914delC	p.His972fs	0/0	32	0.07	0/0	20	0	0/1	17	0.24	0/1	26	0.12
18	3472493	C	T	5_prime_UTR_premature_start_codon_gain_variant	G430049J08Rik	ENSMUSG00000096528	transcript	ENSMUST00000179907	protein_coding	c.-450C>T		0/0	22	0	0/0	15	0	0/1	22	0.27	0/1	25	0.16
18	27599128	T	C	missense_variant	Gm7729	ENSMUSG00000046636	transcript	ENSMUST00000050143	protein_coding	c.485T>C	p.Ile162Thr	0/0	3	0	0/0	4	0	0/1	6	0.33	0/1	12	0.33
19	28666108	G	C	missense_variant	Glis3	ENSMUSG00000052942	transcript	ENSMUST00000162022	protein_coding	c.33C>G	p.His11Gln	0/0	30	0	0/0	20	0	0/1	33	0.21	0/1	33	0.39
19	31743292	GA	G	splice_region_variant&intron_variant	Prkg1	ENSMUSG00000052920	transcript	ENSMUST00000182685	protein_coding	c.302-4delT		0|1	24	0.29	0/1	28	0.43	0/0	25	0	0/0	25	0.09
19	40097952	T	A	splice_region_variant&intron_variant	Cyp2c50	ENSMUSG00000054827	transcript	ENSMUST00000080171	protein_coding	c.962-3T>A		0/0	5	0	0/0	9	0	0|1	13	0.62	0|1	10	0.2
19	40097966	G	A	missense_variant	Cyp2c50	ENSMUSG00000054827	transcript	ENSMUST00000080171	protein_coding	c.973G>A	p.Glu325Lys	0/0	5	0	0/0	10	0	0|1	14	0.57	0|1	10	0.2
2	86216955	C	T	missense_variant	Olfr1046	ENSMUSG00000075197	transcript	ENSMUST00000099902	protein_coding	c.754G>A	p.Val252Ile	0/0	14	0	0/0	8	0	0/1	21	0.14	0/1	19	0.26
2	154009164	T	G	missense_variant	Bpifa2	ENSMUSG00000042459	transcript	ENSMUST00000048103	protein_coding	c.44T>G	p.Ile15Ser	0|0	18	0.06	0/0	29	0	0|1	15	0.27	0|1	32	0.16
2	154009170	A	C	missense_variant	Bpifa2	ENSMUSG00000042459	transcript	ENSMUST00000048103	protein_coding	c.50A>C	p.Asn17Thr	0|0	17	0	0/0	29	0	0|1	16	0.25	0|1	30	0.13
2	154009175	G	A	missense_variant	Bpifa2	ENSMUSG00000042459	transcript	ENSMUST00000048103	protein_coding	c.55G>A	p.Glu19Lys	0|0	18	0	0/0	29	0	0|1	17	0.24	0|1	30	0.13
2	154009181	C	G	missense_variant	Bpifa2	ENSMUSG00000042459	transcript	ENSMUST00000048103	protein_coding	c.61C>G	p.Leu21Val	0|0	18	0	0/0	29	0	0|1	17	0.24	0|1	30	0.1
2	154009184	C	T	missense_variant	Bpifa2	ENSMUSG00000042459	transcript	ENSMUST00000048103	protein_coding	c.64C>T	p.Leu22Phe	0|0	18	0	0/0	26	0	0|1	17	0.24	0|1	28	0.11
2	154009189	TG	T	frameshift_variant	Bpifa2	ENSMUSG00000042459	transcript	ENSMUST00000048103	protein_coding	c.70delG	p.Glu24fs	0/0	19	0	0/0	26	0	0|1	16	0.25	0|1	28	0.11
2	154009192	AC	A	frameshift_variant	Bpifa2	ENSMUSG00000042459	transcript	ENSMUST00000048103	protein_coding	c.73delC	p.Gly26fs	0/0	20	0	0/0	26	0	0|1	17	0.24	0|1	25	0.08
2	154009194	T	TAA	frameshift_variant	Bpifa2	ENSMUSG00000042459	transcript	ENSMUST00000048103	protein_coding	c.74_75insAA	p.Gly26fs	0/0	20	0	0/0	26	0	0|1	17	0.24	0|1	25	0.08
3	15963663	T	A	missense_variant	Gm5150	ENSMUSG00000078780	transcript	ENSMUST00000108347	protein_coding	c.443A>T	p.Lys148Ile	0|1	18	0.17	0|1	14	0.29	0/0	14	0	0/0	11	0
3	15963666	C	T	missense_variant	Gm5150	ENSMUSG00000078780	transcript	ENSMUST00000108347	protein_coding	c.440G>A	p.Gly147Glu	0/1	18	0.83	0/1	14	0.71	1|1	15	1	1|1	8	1
3	19260295	G	GA	splice_region_variant&intron_variant	Pde7a	ENSMUSG00000069094	transcript	ENSMUST00000099195	protein_coding	c.139-4dupT		1|1	23	1	1|1	15	1	0/1	25	0.84	0/1	40	0.89
3	64163637	A	T	splice_region_variant&non_coding_transcript_exon_variant	Gm5139	ENSMUSG00000093447	transcript	ENSMUST00000175943	processed_pseudogene	n.248A>T		0/1	29	0.21	0/1	16	0.19	0/0	19	0	0/0	28	0
3	82837814	CT	C	splice_region_variant	Rbm46	ENSMUSG00000033882	transcript	ENSMUST00000182637	protein_coding	c.*634delA		0/1	24	0.17	0|1	18	0.22	0/0	18	0	0/0	26	0.08
3	87939260	C	T	missense_variant	Isg20l2	ENSMUSG00000048039	transcript	ENSMUST00000055984	protein_coding	c.1016C>T	p.Ser339Leu	0/0	31	0	0|0	53	0.06	0|1	32	0.22	0|1	46	0.09
3	87939288	G	C	missense_variant	Isg20l2	ENSMUSG00000048039	transcript	ENSMUST00000055984	protein_coding	c.1044G>C	p.Glu348Asp	0/0	33	0	0/0	50	0.08	0/1	36	0.22	0/1	43	0.19
3	89958554	G	A	splice_region_variant&synonymous_variant	Atp8b2	ENSMUSG00000060671	transcript	ENSMUST00000171422	protein_coding	c.216C>T	p.Phe72Phe	0/1	32	0.19	0/1	37	0.38	0/0	22	0	0/0	26	0
3	108673375	T	C	missense_variant	Clcc1	ENSMUSG00000027884	transcript	ENSMUST00000106613	protein_coding	c.1004T>C	p.Ile335Thr	0/0	17	0	0/0	27	0	0|1	25	0.2	0|1	44	0.16
3	152981171	C	CCTG	conservative_inframe_insertion	St6galnac5	ENSMUSG00000039037	transcript	ENSMUST00000044278	protein_coding	c.142_144dupCAG	p.Gln48dup	0/1	18	0.89	0|1	20	0.85	1|1	22	1	1|1	23	0.96
3	155087579	G	T	missense_variant	Fpgt	ENSMUSG00000053870	transcript	ENSMUST00000066568	protein_coding	c.810C>A	p.His270Gln	0/0	27	0	0/0	21	0	0/1	15	0.2	0/1	33	0.18
4	39433755	T	TATA	splice_region_variant&intron_variant	Gm17094	ENSMUSG00000090839	transcript	ENSMUST00000169881	antisense	n.288-3_288-2insTAT		0|1	11	0.82	0/1	23	0.52	1|1	11	1	1|1	9	1
4	39433756	A	AT	splice_region_variant&intron_variant	Gm17094	ENSMUSG00000090839	transcript	ENSMUST00000169881	antisense	n.288-4_288-3insA		0|1	11	0.18	0|1	23	0.3	0/0	11	0	0/0	8	0
4	60139294	T	A	missense_variant	Mup2	ENSMUSG00000078688	transcript	ENSMUST00000074700	protein_coding	c.155A>T	p.Asp52Val	0/0	7	0	0/0	9	0	0/1	12	0.25	0/1	16	0.44
4	61595798	C	T	5_prime_UTR_premature_start_codon_gain_variant	Mup17	ENSMUSG00000096688	transcript	ENSMUST00000107484	protein_coding	c.-38G>A		0/0	40	0	0/0	39	0.13	0/1	52	0.37	0/1	37	0.27
4	70228730	GA	G	splice_region_variant&intron_variant	Cdk5rap2	ENSMUSG00000039298	transcript	ENSMUST00000144099	protein_coding	c.5239-7delT		0/0	16	0	0/0	19	0	0/1	11	0.27	0/1	17	0.12
4	88816738	G	A	missense_variant	Ifna7	ENSMUSG00000070907	transcript	ENSMUST00000105143	protein_coding	c.511G>A	p.Val171Ile	0/1	12	0.67	0/1	28	0.86	1|1	16	0.94	1|1	24	0.96
4	113535758	T	C	missense_variant&splice_region_variant	Skint5	ENSMUSG00000078598	transcript	ENSMUST00000169631	protein_coding	c.3676A>G	p.Thr1226Ala	0/0	14	0	0/0	2	0	0|1	5	0.2	0|1	20	0.2
4	113535759	C	A	missense_variant&splice_region_variant	Skint5	ENSMUSG00000078598	transcript	ENSMUST00000169631	protein_coding	c.3675G>T	p.Glu1225Asp	0/0	14	0	0|0	2	0	0|1	5	0.2	0/1	20	0.25
4	113763470	G	A	splice_region_variant&intron_variant	Skint5	ENSMUSG00000078598	transcript	ENSMUST00000169631	protein_coding	c.2038+8C>T		0/1	22	0.86	0/1	7	0.86	1|1	8	1	1|1	26	1
4	113763496	T	A	missense_variant	Skint5	ENSMUSG00000078598	transcript	ENSMUST00000169631	protein_coding	c.2020A>T	p.Ser674Cys	0/1	24	0.21	0/1	6	0.17	0/0	9	0	0/0	19	0
4	113763503	A	T	missense_variant	Skint5	ENSMUSG00000078598	transcript	ENSMUST00000169631	protein_coding	c.2013T>A	p.Ser671Arg	0/1	25	0.8	0/1	6	0.83	1|1	9	1	1|1	20	1
4	113763516	A	G	missense_variant	Skint5	ENSMUSG00000078598	transcript	ENSMUST00000169631	protein_coding	c.2000T>C	p.Ile667Thr	0|1	25	0.8	0|1	6	0.83	1|1	9	1	1|1	19	1
4	113763519	T	C	missense_variant	Skint5	ENSMUSG00000078598	transcript	ENSMUST00000169631	protein_coding	c.1997A>G	p.Lys666Arg	0|1	25	0.8	0|1	6	0.83	1|1	9	1	1|1	21	1
4	113763523	C	A	missense_variant	Skint5	ENSMUSG00000078598	transcript	ENSMUST00000169631	protein_coding	c.1993G>T	p.Val665Leu	0|1	22	0.23	0|1	6	0.17	0/0	8	0	0/0	20	0
4	113763534	T	A	missense_variant	Skint5	ENSMUSG00000078598	transcript	ENSMUST00000169631	protein_coding	c.1982A>T	p.Lys661Ile	0|1	21	0.76	0|1	5	0.8	1|1	8	1	1|1	21	1
4	113763537	G	T	missense_variant	Skint5	ENSMUSG00000078598	transcript	ENSMUST00000169631	protein_coding	c.1979C>A	p.Thr660Lys	0|1	22	0.77	0|1	5	0.8	1|1	8	1	1|1	22	1
4	113763540	C	T	missense_variant&splice_region_variant	Skint5	ENSMUSG00000078598	transcript	ENSMUST00000169631	protein_coding	c.1976G>A	p.Gly659Glu	0|1	21	0.76	0|1	5	0.8	1|1	8	1	1|1	21	1
4	113763541	C	A	splice_acceptor_variant&intron_variant	Skint5	ENSMUSG00000078598	transcript	ENSMUST00000169631	protein_coding	c.1976-1G>T		0|1	21	0.24	0|1	5	0.2	0/0	7	0	0/0	20	0
4	115565663	CCTTTCAGATCCAAAGG	C	frameshift_variant&splice_acceptor_variant&splice_region_variant&intron_variant	Cyp4a31	ENSMUSG00000028712	transcript	ENSMUST00000030486	protein_coding	c.335-5_345delTTCAGATCCAAAGGCT	p.Asp112fs	0/1	30	0.93	0/1	27	0.78	1|1	16	1	1|1	26	0.96
4	133679940	CT	C	splice_region_variant	Arid1a	ENSMUSG00000007880	transcript	ENSMUST00000008024	protein_coding	c.*390delA		0/1	18	0.31	0/1	16	0.5	0/0	17	0.12	0/0	22	0.11
4	146466458	T	A	missense_variant	Gm13251	ENSMUSG00000070605	transcript	ENSMUST00000105733	protein_coding	c.635T>A	p.Phe212Tyr	0/1	28	0.14	0/1	22	0.23	0/0	26	0	0/0	24	0
4	156338479	G	C	missense_variant	Vmn2r-ps159	ENSMUSG00000057021	transcript	ENSMUST00000096792	protein_coding	c.1972G>C	p.Val658Leu	0/0	10	0	0/0	14	0	0/1	12	0.25	0|1	17	0.24
4	156338494	T	G	missense_variant	Vmn2r-ps159	ENSMUSG00000057021	transcript	ENSMUST00000096792	protein_coding	c.1987T>G	p.Ser663Ala	0/0	12	0	0/0	14	0.07	0/1	9	0.33	0|1	20	0.3
4	156351332	C	T	missense_variant	Gm20782	ENSMUSG00000096042	transcript	ENSMUST00000096794	protein_coding	c.1004C>T	p.Ala335Val	0/0	20	0	0/0	31	0.06	0/1	16	0.12	0|1	39	0.23
4	156351354	A	C	missense_variant	Gm20782	ENSMUSG00000096042	transcript	ENSMUST00000096794	protein_coding	c.1026A>C	p.Gln342His	0/0	17	0	0/0	28	0.07	0/1	15	0.13	0|1	38	0.24
5	15655870	G	A	splice_region_variant&intron_variant	4930572O03Rik	ENSMUSG00000069720	transcript	ENSMUST00000092696	protein_coding	c.8-7C>T		0/0	4	0	0/0	5	0	0/1	17	0.12	0/1	11	0.27
5	15705447	G	A	splice_acceptor_variant&intron_variant	Speer7-ps1	ENSMUSG00000089871	transcript	ENSMUST00000162113	processed_transcript	n.205-1G>A		0/1	9	0.22	0/1	15	0.33	0/0	10	0	0/0	12	0
5	21288570	A	AT	splice_region_variant&intron_variant	Gsap	ENSMUSG00000039934	transcript	ENSMUST00000036031	protein_coding	c.2222-5dupT		0/1	13	0.23	0/1	24	0.12	0/0	27	0	0/0	27	0
5	25925068	T	A	missense_variant	Gm21655	ENSMUSG00000096878	transcript	ENSMUST00000167847	protein_coding	c.157A>T	p.Thr53Ser	0/0	29	0	0/0	20	0	0/1	32	0.12	0/1	35	0.2
5	45495148	A	AT	splice_region_variant&intron_variant	Lap3	ENSMUSG00000039682	transcript	ENSMUST00000046122	protein_coding	c.103-4dupT		0/1	19	0.29	0/1	22	0.86	1|1	22	0.91	1|1	27	0.89
5	76638056	T	G	splice_region_variant&intron_variant	Cep135	ENSMUSG00000036403	transcript	ENSMUST00000049060	protein_coding	c.3013-8T>G		0|1	31	0.19	0|1	70	0.46	0/0	25	0	0/0	34	0
5	76638058	C	G	splice_region_variant&intron_variant	Cep135	ENSMUSG00000036403	transcript	ENSMUST00000049060	protein_coding	c.3013-6C>G		0|1	30	0.2	0|1	70	0.46	0/0	25	0	0/0	34	0
5	76638059	TG	T	splice_region_variant&intron_variant	Cep135	ENSMUSG00000036403	transcript	ENSMUST00000049060	protein_coding	c.3013-4delG		0|1	30	0.2	0|1	71	0.45	0/0	25	0	0/0	34	0
5	76638064	G	C	missense_variant&splice_region_variant	Cep135	ENSMUSG00000036403	transcript	ENSMUST00000049060	protein_coding	c.3013G>C	p.Ala1005Pro	0|1	29	0.21	0|1	68	0.47	0/0	25	0	0/0	34	0
5	76638065	C	T	missense_variant&splice_region_variant	Cep135	ENSMUSG00000036403	transcript	ENSMUST00000049060	protein_coding	c.3014C>T	p.Ala1005Val	0|1	29	0.21	0|1	68	0.47	0/0	25	0	0/0	34	0
5	76638068	T	TTC	frameshift_variant	Cep135	ENSMUSG00000036403	transcript	ENSMUST00000049060	protein_coding	c.3017_3018insTC	p.Ala1007fs	0|1	30	0.2	0|1	68	0.47	0/0	25	0	0/0	34	0
5	76638069	A	AAGAAAAACAATTTTGATTTT	frameshift_variant	Cep135	ENSMUSG00000036403	transcript	ENSMUST00000049060	protein_coding	c.3018_3019insAGAAAAACAATTTTGATTTT	p.Ala1007fs	0|1	30	0.2	0|1	69	0.46	0/0	25	0	0/0	34	0
5	76638073	G	A	missense_variant	Cep135	ENSMUSG00000036403	transcript	ENSMUST00000049060	protein_coding	c.3022G>A	p.Glu1008Lys	0|1	30	0.2	0|1	66	0.45	0/0	25	0	0/0	34	0
5	76638077	T	TTTTGACCAATCGTTTGGTTTTTGTTAAACAA	frameshift_variant	Cep135	ENSMUSG00000036403	transcript	ENSMUST00000049060	protein_coding	c.3026_3027insTTTGACCAATCGTTTGGTTTTTGTTAAACAA	p.Leu1009fs	0|1	29	0.21	0|1	66	0.45	0/0	25	0	0/0	34	0
5	76638079	G	GGCA	disruptive_inframe_insertion	Cep135	ENSMUSG00000036403	transcript	ENSMUST00000049060	protein_coding	c.3028_3029insGCA	p.Glu1010delinsGlyLys	0|1	28	0.21	0|1	66	0.44	0/0	25	0	0/0	34	0
5	76638082	A	ATT	frameshift_variant	Cep135	ENSMUSG00000036403	transcript	ENSMUST00000049060	protein_coding	c.3031_3032insTT	p.Asn1011fs	0|1	28	0.21	0|1	63	0.43	0/0	24	0	0/0	34	0
5	76638084	T	TTTTGA	frameshift_variant	Cep135	ENSMUSG00000036403	transcript	ENSMUST00000049060	protein_coding	c.3033_3034insTTTGA	p.Val1012fs	0|1	28	0.21	0|1	63	0.41	0/0	24	0	0/0	34	0
5	76638090	ATC	A	frameshift_variant	Cep135	ENSMUSG00000036403	transcript	ENSMUST00000049060	protein_coding	c.3040_3041delTC	p.Ser1014fs	0|1	30	0.2	0|1	56	0.34	0/0	24	0	0/0	34	0
5	76638093	AG	A	frameshift_variant	Cep135	ENSMUSG00000036403	transcript	ENSMUST00000049060	protein_coding	c.3043delG	p.Glu1015fs	0|1	30	0.17	0|1	58	0.33	0/0	24	0	0/0	34	0
5	76638097	TC	T	frameshift_variant	Cep135	ENSMUSG00000036403	transcript	ENSMUST00000049060	protein_coding	c.3047delC	p.Ser1016fs	0|1	30	0.17	0|1	57	0.32	0/0	24	0	0/0	34	0
5	76638100	G	GT	frameshift_variant	Cep135	ENSMUSG00000036403	transcript	ENSMUST00000049060	protein_coding	c.3049_3050insT	p.Glu1017fs	0|1	30	0.17	0|1	55	0.29	0/0	25	0	0/0	34	0
5	76638103	C	CAAT	disruptive_inframe_insertion	Cep135	ENSMUSG00000036403	transcript	ENSMUST00000049060	protein_coding	c.3052_3053insAAT	p.Glu1017_Leu1018insGln	0|1	29	0.14	0|1	52	0.25	0/0	25	0	0/0	34	0
5	104814403	T	G	missense_variant	Zfp951	ENSMUSG00000072774	transcript	ENSMUST00000089906	protein_coding	c.1296A>C	p.Gln432His	0/0	32	0	0/0	19	0	0|1	19	0.53	0|1	24	0.54
5	117895931	G	A	splice_region_variant&intron_variant	Nos1	ENSMUSG00000029361	transcript	ENSMUST00000102557	protein_coding	c.1112+5G>A		0/1	43	0.35	0/1	39	0.23	0/0	20	0	0/0	41	0
5	129020766	TAGGTAGGTGCGGCCGGGGGTGCTTCACGGCAGCGAGGCCTCCGGGGGAAGGCGGCGGGCAGTGCACGGCTGACCCCTTCTGCCGCCCTGTTCCCCGC	T	splice_acceptor_variant&splice_donor_variant&splice_region_variant&intron_variant	Ran	ENSMUSG00000029430	transcript	ENSMUST00000031383	protein_coding	c.121+1_122-1delGTAGGTGCGGCCGGGGGTGCTTCACGGCAGCGAGGCCTCCGGGGGAAGGCGGCGGGCAGTGCACGGCTGACCCCTTCTGCCGCCCTGTTCCCCGCAG		0|1	39	0.08	0|1	70	0.2	0/0	26	0	0/0	49	0.1
5	148893678	C	T	splice_region_variant&intron_variant	Katnal1	ENSMUSG00000041298	transcript	ENSMUST00000047257	protein_coding	c.720+5G>A		0/1	29	0.31	0/1	38	0.29	0/0	18	0	0/0	26	0
6	81962421	A	T	missense_variant	Mrpl19	ENSMUSG00000030045	transcript	ENSMUST00000032124	protein_coding	c.552T>A	p.Asp184Glu	0/0	13	0	0/0	26	0	0/1	13	0.46	0/1	18	0.22
6	89146612	GCA	G	frameshift_variant	Gm1965	ENSMUSG00000072917	transcript	ENSMUST00000101176	protein_coding	c.398_399delAC	p.His133fs	0/0	21	0	0/0	21	0	0/1	15	0.2	0/1	20	0.11
6	113374385	CT	C	splice_region_variant	Tada3	ENSMUSG00000048930	transcript	ENSMUST00000113107	protein_coding	c.*610delA		0/1	18	0.22	0/1	27	0.19	0/0	27	0	0/0	24	0
6	122880763	G	GGCGCAGCGCATT	splice_donor_variant&intron_variant	Necap1	ENSMUSG00000030327	transcript	ENSMUST00000032477	protein_coding	c.301+1_301+2insGCGCAGCGCATT		0|1	35	0.49	0|1	46	0.33	0/0	50	0	0/0	53	0
6	126866488	A	C	missense_variant	Akap3	ENSMUSG00000030344	transcript	ENSMUST00000095440	protein_coding	c.2069A>C	p.Lys690Thr	0/0	23	0	0/0	24	0	0/1	18	0.28	0/1	17	0.29
6	128784242	CTAAA	C	frameshift_variant	Klrb1c	ENSMUSG00000030325	transcript	ENSMUST00000174404	protein_coding	c.417_420delTTTA	p.Asn139fs	0|1	26	0.23	0|1	31	0.16	0|0	19	0.05	0/0	40	0
6	128784246	A	ACTGC	frameshift_variant	Klrb1c	ENSMUSG00000030325	transcript	ENSMUST00000174404	protein_coding	c.416_417insGCAG	p.Asn139fs	0|1	26	0.23	0|1	31	0.16	0|0	19	0.05	0/0	40	0
6	128784250	A	G	missense_variant	Klrb1c	ENSMUSG00000030325	transcript	ENSMUST00000174404	protein_coding	c.413T>C	p.Val138Ala	0|1	24	0.21	0|1	31	0.16	0|0	18	0.06	0/0	40	0
6	128784254	A	G	missense_variant	Klrb1c	ENSMUSG00000030325	transcript	ENSMUST00000174404	protein_coding	c.409T>C	p.Ser137Pro	0|1	24	0.21	0|1	30	0.13	0|0	18	0.06	0/0	40	0
6	129376352	A	G	splice_region_variant&intron_variant	Clec12b	ENSMUSG00000030158	transcript	ENSMUST00000032261	protein_coding	c.678-7T>C		0/1	22	0.23	0/1	15	0.27	0/0	17	0	0/0	31	0
6	132115161	TGGGCCTCCCTGTGGGGGTGGTCCTTGTTGGTTTCCAGGCTGAGGTGGTCTCTGCTGG	T	disruptive_inframe_deletion	Gm4736	ENSMUSG00000079276	transcript	ENSMUST00000100870	protein_coding	c.486_542delCCAGCAGAGACCACCTCAGCCTGGAAACCAACAAGGACCACCCCCACAGGGAGGCCC	p.Gln163_Pro181del	0/0	21	0	0/0	14	0	0/1	14	0.21	0/1	27	0.22
6	145366829	G	GA	splice_region_variant&intron_variant	Ifltd1	ENSMUSG00000054966	transcript	ENSMUST00000148739	nonsense_mediated_decay	n.*537-6dupT		1|1	12	1	1|1	33	0.97	0/1	18	0.89	0/1	24	0.88
6	145392230	GA	G	splice_region_variant&non_coding_transcript_exon_variant	1700073E17Rik	ENSMUSG00000087204	transcript	ENSMUST00000152419	processed_transcript	n.1117delA		0/0	13	0	0/0	15	0	0/1	18	0.22	0/1	29	0.31
7	4580976	C	T	missense_variant	Ptprh	ENSMUSG00000035429	transcript	ENSMUST00000049113	protein_coding	c.616G>A	p.Ala206Thr	0/1	19	0.21	0/1	27	0.15	0/0	21	0	0/0	26	0.08
7	7205545	G	T	missense_variant	Zfp772	ENSMUSG00000066838	transcript	ENSMUST00000074455	protein_coding	c.299C>A	p.Pro100His	0/0	16	0	0/0	21	0.1	0/1	20	0.3	0|1	35	0.2
7	7232204	T	G	missense_variant	Vmn2r29	ENSMUSG00000095730	transcript	ENSMUST00000170922	protein_coding	c.1682A>C	p.Glu561Ala	1|1	19	0.89	1|1	11	0.91	0/1	10	0.6	0/1	17	0.59
7	7239991	C	T	missense_variant	Vmn2r29	ENSMUSG00000095730	transcript	ENSMUST00000170922	protein_coding	c.1519G>A	p.Gly507Arg	0/0	11	0	0/0	24	0	0/1	24	0.12	0/1	26	0.35
7	7269297	T	C	splice_region_variant&non_coding_transcript_exon_variant	RP23-344G11.3	ENSMUSG00000098900	transcript	ENSMUST00000174801	unprocessed_pseudogene	n.39A>G		1|1	10	1	1|1	1	1	0|1	10	0.7	0|1	8	0.75
7	7323106	C	A	missense_variant	Vmn2r30	ENSMUSG00000070847	transcript	ENSMUST00000072475	protein_coding	c.1474G>T	p.Gly492Cys	0/0	6	0	0/0	7	0	0/1	8	0.38	0/1	20	0.5
7	8908233	C	A	missense_variant	Vmn2r40	ENSMUSG00000090864	transcript	ENSMUST00000169206	protein_coding	c.2060G>T	p.Arg687Ile	0/1	12	0.17	0/1	11	0.27	0/0	5	0	0/0	9	0
7	9986367	T	C	missense_variant	Vmn2r49	ENSMUSG00000096180	transcript	ENSMUST00000108550	protein_coding	c.1196A>G	p.Tyr399Cys	0/1	48	0.21	0/1	23	0.22	0/0	44	0.09	0/0	61	0.07
7	9986424	T	C	missense_variant	Vmn2r49	ENSMUSG00000096180	transcript	ENSMUST00000108550	protein_coding	c.1139A>G	p.Asp380Gly	0/0	71	0	0/0	37	0.11	0/1	64	0.14	0/1	75	0.23
7	9987055	C	T	missense_variant	Vmn2r49	ENSMUSG00000096180	transcript	ENSMUST00000108550	protein_coding	c.508G>A	p.Gly170Arg	0/1	22	0.27	0/1	8	0.25	0/0	22	0	0/0	24	0.08
7	10381344	C	A	splice_region_variant&non_coding_transcript_exon_variant	Nlrp4d	ENSMUSG00000034122	transcript	ENSMUST00000086269	transcribed_unprocessed_pseudogene	n.1453G>T		0|1	12	0.83	0|1	16	0.88	1|1	20	1	1|1	19	1
7	10446864	T	A	missense_variant	Vmn1r67	ENSMUSG00000046716	transcript	ENSMUST00000055964	protein_coding	c.54T>A	p.Ser18Arg	0|1	16	0.12	0|1	12	0.25	0/0	14	0	0/0	16	0
7	10446878	A	ATG	frameshift_variant	Vmn1r67	ENSMUSG00000046716	transcript	ENSMUST00000055964	protein_coding	c.69_70insGT	p.Phe24fs	0|1	15	0.13	0|1	13	0.23	0/0	13	0	0/0	19	0
7	10446886	C	T	missense_variant	Vmn1r67	ENSMUSG00000046716	transcript	ENSMUST00000055964	protein_coding	c.76C>T	p.Leu26Phe	0|1	13	0.08	0|1	11	0.27	0/0	13	0	0/0	18	0
7	10446889	C	G	missense_variant	Vmn1r67	ENSMUSG00000046716	transcript	ENSMUST00000055964	protein_coding	c.79C>G	p.Leu27Val	0|1	12	0.08	0|1	11	0.27	0/0	13	0	0/0	18	0
7	10446890	TTA	T	frameshift_variant	Vmn1r67	ENSMUSG00000046716	transcript	ENSMUST00000055964	protein_coding	c.82_83delAT	p.Ile28fs	0|1	13	0.08	0|1	11	0.27	0/0	13	0	0/0	16	0
7	10446896	A	T	missense_variant	Vmn1r67	ENSMUSG00000046716	transcript	ENSMUST00000055964	protein_coding	c.86A>T	p.Tyr29Phe	0|1	12	0.08	0|1	11	0.27	0/0	14	0	0/0	15	0
7	10446904	G	T	missense_variant	Vmn1r67	ENSMUSG00000046716	transcript	ENSMUST00000055964	protein_coding	c.94G>T	p.Val32Phe	0|1	12	0.08	0|1	11	0.27	0/0	13	0	0/0	14	0
7	10446935	C	A	missense_variant	Vmn1r67	ENSMUSG00000046716	transcript	ENSMUST00000055964	protein_coding	c.125C>A	p.Thr42Lys	0|1	13	0.15	0|1	11	0.27	0/0	14	0	0|0	17	0.06
7	10446939	T	G	missense_variant	Vmn1r67	ENSMUSG00000046716	transcript	ENSMUST00000055964	protein_coding	c.129T>G	p.Asp43Glu	0|1	14	0.14	0|1	13	0.23	0/0	14	0	0|0	17	0.06
7	10446954	C	A	missense_variant	Vmn1r67	ENSMUSG00000046716	transcript	ENSMUST00000055964	protein_coding	c.144C>A	p.His48Gln	0/1	13	0.85	0/1	13	0.77	1|1	15	1	1|1	20	0.95
7	10446986	T	C	missense_variant	Vmn1r67	ENSMUSG00000046716	transcript	ENSMUST00000055964	protein_coding	c.176T>C	p.Phe59Ser	0|1	12	0.83	0|1	12	0.92	1|1	13	1	1|1	18	0.94
7	10446989	C	G	missense_variant	Vmn1r67	ENSMUSG00000046716	transcript	ENSMUST00000055964	protein_coding	c.179C>G	p.Thr60Arg	0|1	12	0.83	0|1	12	0.92	1|1	13	1	1|1	18	0.94
7	27033987	GCT	G	splice_region_variant&intron_variant	Cyp2a12	ENSMUSG00000060407	transcript	ENSMUST00000075552	protein_coding	c.829-5_829-4delTC		0/1	15	0.2	0/1	13	0.23	0/0	19	0	0/0	20	0.06
7	41158239	A	C	missense_variant	Gm2128	ENSMUSG00000078737	transcript	ENSMUST00000108009	protein_coding	c.1515A>C	p.Lys505Asn	0/0	24	0	0/0	19	0	0|1	29	0.21	0/1	43	0.09
7	62418753	C	T	missense_variant	Mkrn3	ENSMUSG00000070527	transcript	ENSMUST00000094340	protein_coding	c.1289G>A	p.Gly430Glu	0/1	10	0.4	0/1	10	0.2	0/0	15	0	0/0	19	0
7	85620768	G	T	missense_variant	Vmn2r71	ENSMUSG00000091205	transcript	ENSMUST00000172338	protein_coding	c.1486G>T	p.Ala496Ser	0|0	13	0	0/0	11	0	0|1	23	0.3	0|1	26	0.08
7	85620769	C	T	missense_variant	Vmn2r71	ENSMUSG00000091205	transcript	ENSMUST00000172338	protein_coding	c.1487C>T	p.Ala496Val	0|0	13	0	0/0	11	0	0|1	23	0.3	0|1	26	0.08
7	85620779	G	T	missense_variant	Vmn2r71	ENSMUSG00000091205	transcript	ENSMUST00000172338	protein_coding	c.1497G>T	p.Met499Ile	0|0	15	0	0/0	11	0	0|1	20	0.2	0|1	29	0.07
7	103767507	C	T	missense_variant	Olfr69	ENSMUSG00000058662	transcript	ENSMUST00000080910	protein_coding	c.889G>A	p.Val297Ile	0/1	8	0.62	0/1	8	0.88	1|1	11	0.91	1|1	25	0.92
7	103881539	A	C	missense_variant	Olfr66	ENSMUSG00000058200	transcript	ENSMUST00000079117	protein_coding	c.703T>G	p.Ser235Ala	0|1	20	0.2	0|1	14	0.21	0/0	15	0	0|0	31	0.06
7	103881544	T	G	missense_variant	Olfr66	ENSMUSG00000058200	transcript	ENSMUST00000079117	protein_coding	c.698A>C	p.Lys233Thr	0|1	19	0.21	0|1	15	0.2	0/0	16	0	0|0	31	0.06
7	103881545	T	C	missense_variant	Olfr66	ENSMUSG00000058200	transcript	ENSMUST00000079117	protein_coding	c.697A>G	p.Lys233Glu	0|1	19	0.21	0|1	15	0.2	0/0	16	0	0|0	31	0.06
7	114248801	C	T	splice_region_variant&intron_variant	Copb1	ENSMUSG00000030754	transcript	ENSMUST00000033012	protein_coding	c.491+7G>A		1|1	19	1	1|1	17	1	0|1	11	0.64	0|1	21	0.81
7	126578358	C	CT	splice_region_variant&non_coding_transcript_exon_variant	Cln3	ENSMUSG00000030720	transcript	ENSMUST00000153790	retained_intron	n.1821dupA		0/0	9	0	0/0	27	0	0/1	17	0.29	0/1	19	0.32
7	141638141	G	C	missense_variant	Muc6	ENSMUSG00000048191	transcript	ENSMUST00000062451	protein_coding	c.6423C>G	p.His2141Gln	0/0	22	0	0/0	35	0	0/1	20	0.2	0/1	32	0.25
7	142212105	A	AGCTGTGGCTCCTGTGGGGGATGCAAGGGAG	disruptive_inframe_insertion	Gm7579	ENSMUSG00000073786	transcript	ENSMUST00000097943	protein_coding	c.267_296dupATGCAAGGGAGGCTGTGGCTCCTGTGGGGG	p.Gly99_Cys100insCysLysGlyGlyCysGlySerCysGlyGly	0/1	8	0.75	0/1	4	0.75	1|1	17	1	1|1	16	1
8	15042020	G	A	missense_variant	BB014433	ENSMUSG00000049008	transcript	ENSMUST00000050493	protein_coding	c.832C>T	p.Arg278Trp	0/0	13	0	0/0	18	0	0/1	12	0.17	0/1	13	0.23
8	19279124	G	A	splice_region_variant&intron_variant	Gm15357	ENSMUSG00000081901	transcript	ENSMUST00000119160	processed_pseudogene	n.173-3C>T		0/0	66	0	0/0	51	0	0|1	59	0.56	0|1	82	0.52
8	19279127	T	G	splice_region_variant&intron_variant	Gm15357	ENSMUSG00000081901	transcript	ENSMUST00000119160	processed_pseudogene	n.173-6A>C		0/0	65	0	0/0	52	0	0/1	57	0.54	0|1	80	0.53
8	19295101	A	T	missense_variant	Defb3	ENSMUSG00000039775	transcript	ENSMUST00000033852	protein_coding	c.72A>T	p.Lys24Asn	0/1	45	0.24	0/1	37	0.16	0/0	36	0	0/0	42	0
8	20339022	G	C	missense_variant	Gm15319	ENSMUSG00000074449	transcript	ENSMUST00000084046	protein_coding	c.986C>G	p.Ala329Gly	0/0	9	0	0/0	11	0	0/1	17	0.24	0/1	15	0.13
8	21316334	C	A	missense_variant	Gm15299	ENSMUSG00000082211	transcript	ENSMUST00000167683	protein_coding	c.229C>A	p.Leu77Met	0/0	9	0	0/0	16	0	0/1	32	0.16	0/1	29	0.31
8	21316371	C	T	missense_variant	Gm15299	ENSMUSG00000082211	transcript	ENSMUST00000167683	protein_coding	c.266C>T	p.Thr89Met	1|1	8	1	1|1	16	0.94	0/1	33	0.82	0/1	32	0.66
8	21618306	G	A	missense_variant	Defa26	ENSMUSG00000060070	transcript	ENSMUST00000074343	protein_coding	c.124G>A	p.Val42Met	1|1	9	1	1|1	10	1	0/1	18	0.83	0/1	24	0.83
8	40990768	T	TA	splice_region_variant	Pdgfrl	ENSMUSG00000031595	transcript	ENSMUST00000034004	protein_coding	c.*279dupA		0/0	24	0	0/0	28	0.12	0/1	36	0.39	0/1	33	0.15
8	71679544	G	GC	splice_region_variant&intron_variant	Jak3	ENSMUSG00000031805	transcript	ENSMUST00000051995	protein_coding	c.567-5dupC		0/1	17	0.88	0/1	37	0.84	1|1	19	1	1|1	33	0.94
8	76906575	CT	C	splice_region_variant&intron_variant	Nr3c2	ENSMUSG00000031618	transcript	ENSMUST00000128862	protein_coding	c.-33-3delT		0/1	20	0.29	0/1	16	0.12	0/0	20	0	0/0	32	0
9	3006411	T	G	missense_variant	Gm11168	ENSMUSG00000096385	transcript	ENSMUST00000179881	protein_coding	c.430T>G	p.Ser144Ala	0/0	962	0	0/0	56	0	0/1	43	0.4	0/1	18	0.13
9	3006421	C	T	missense_variant	Gm11168	ENSMUSG00000096385	transcript	ENSMUST00000179881	protein_coding	c.440C>T	p.Ser147Leu	0/0	242	0	0/0	70	0	0|1	51	0.39	0/1	21	0.11
9	3017525	T	G	missense_variant	Gm10719	ENSMUSG00000095547	transcript	ENSMUST00000099049	protein_coding	c.114T>G	p.Cys38Trp	0/0	399	0	0/0	56	0	0/1	171	0.23	0|1	146	0.23
9	3017531	T	A	missense_variant	Gm10719	ENSMUSG00000095547	transcript	ENSMUST00000099049	protein_coding	c.120T>A	p.Phe40Leu	0/0	383	0	0/0	56	0	0|1	161	0.24	0|1	139	0.24
9	9017009	C	G	missense_variant	Arhgap42	ENSMUSG00000050730	transcript	ENSMUST00000093893	protein_coding	c.1153G>C	p.Gly385Arg	0/0	21	0	0/0	19	0	0/1	23	0.22	0/1	32	0.16
9	22462042	GA	G	frameshift_variant	Gm17545	ENSMUSG00000091159	transcript	ENSMUST00000168332	protein_coding	c.68delA	p.Asn23fs	0/1	15	0.27	0/1	23	0.17	0/0	22	0	0/0	21	0
9	39614278	C	T	missense_variant	Olfr148	ENSMUSG00000048299	transcript	ENSMUST00000050807	protein_coding	c.710C>T	p.Ser237Phe	0/1	38	0.21	0/1	24	0.17	0/0	26	0	0/0	37	0.11
9	48393023	A	C	missense_variant	Nxpe4	ENSMUSG00000044229	transcript	ENSMUST00000093853	protein_coding	c.409A>C	p.Met137Leu	1|1	16	1	1|1	9	1	0|1	22	0.82	0|1	34	0.88
9	48393039	T	C	missense_variant	Nxpe4	ENSMUSG00000044229	transcript	ENSMUST00000093853	protein_coding	c.425T>C	p.Phe142Ser	1|1	13	1	1|1	10	1	0|1	21	0.81	0|1	36	0.89
9	100495487	T	C	missense_variant	Nck1	ENSMUSG00000032475	transcript	ENSMUST00000116522	protein_coding	c.1124A>G	p.His375Arg	0|1	22	0.09	0|1	25	0.24	0/0	14	0	0/0	19	0
9	100495491	T	G	missense_variant	Nck1	ENSMUSG00000032475	transcript	ENSMUST00000116522	protein_coding	c.1120A>C	p.Lys374Gln	0|1	22	0.09	0|1	25	0.24	0/0	14	0	0/0	19	0
X	3077341	G	T	missense_variant	Gm21950	ENSMUSG00000095801	transcript	ENSMUST00000178827	protein_coding	c.382G>T	p.Gly128Cys	0/0	8	0	0/0	11	0	0/1	14	0.29	0/1	22	0.32
X	25373949	C	T	splice_region_variant&non_coding_transcript_exon_variant	Gm1989	ENSMUSG00000096724	transcript	ENSMUST00000126244	unprocessed_pseudogene	n.196G>A		0/0	10	0	0/0	14	0	0/1	10	0.8	0/1	24	0.42
X	91575537	T	C	missense_variant	1700084M14Rik	ENSMUSG00000057805	transcript	ENSMUST00000078832	protein_coding	c.166A>G	p.Lys56Glu	0/0	15	0	0/0	6	0	0/1	31	0.19	0/1	19	0.37
X	95946559	C	CAGTCTTGGTGTTGGCCACGATCAGTTCAACGGTCCATCTAAGGA	splice_acceptor_variant&intron_variant	Las1l	ENSMUSG00000057421	transcript	ENSMUST00000113864	protein_coding	c.1253-2_1253-1insTCCTTAGATGGACCGTTGAACTGATCGTGGCCAACACCAAGACT		0/1	33	0.24	0|1	34	0.21	0/0	29	0	0/0	44	0
X	135745853	G	T	missense_variant	Armcx5	ENSMUSG00000072969	transcript	ENSMUST00000096321	protein_coding	c.677G>T	p.Gly226Val	0|1	12	0.25	0|1	9	0.22	0/0	16	0	0|0	8	0
X	136115191	CT	C	splice_region_variant&intron_variant	5730412P04Rik	ENSMUSG00000087553	transcript	ENSMUST00000147100	processed_transcript	n.940-4delT		0/0	4	0	0/0	7	0	0/1	11	0.27	0/1	14	0.21
X	136733622	T	C	missense_variant	Morf4l2	ENSMUSG00000031422	transcript	ENSMUST00000033797	protein_coding	c.856A>G	p.Lys286Glu	0/0	15	0	0/0	11	0	0/1	14	0.43	0/1	22	0.45
X	141901194	A	G	splice_region_variant&intron_variant	Gm15298	ENSMUSG00000086907	transcript	ENSMUST00000145916	lincRNA	n.607-7T>C		0/1	28	0.25	0/1	27	0.15	0/0	27	0.07	0/0	24	0
